# Supplementary material for: Multimodal MRI marker of cognition explains the association between cognition and mental health in the UK Biobank
Source: eLife. 2026 May 20;14:RP108109. doi: 10.7554/eLife.108109 (PMC13189626; doi:10.7554/eLife.108109)
Supplement: Figure 2—source data 1. [file elife-108109-fig2-data1.xlsx]

## Sheet: Figure 2a
Loadings of the cognitive test scores onto four latent factors and loadings of the latent factors onto the g-factor based on the ESEM.
Cognitive test	Latent Factor	Loading
(log)Reaction time	Factor 1	0.3622
Fluid intelligence score	Factor 1	-0.0393
Numeric memory: Maximum digits remembered correctly	Factor 1	-0.1812
(log)Trail making test: Duration to complete numeric path	Factor 1	0.7052
(log)Trail making test: Duration to complete alphabetic path	Factor 1	0.6954
Symbol digit substitution: Number of correct matches	Factor 1	-0.4956
Paired associate learning: Number of correct pairs	Factor 1	-0.0622
Tower rearranging: Number of puzzles correct	Factor 1	0.0045
Matrix pattern completion: Number of puzzles correct	Factor 1	-0.0448
(logx+1)Pairs matching: Incorrect matches	Factor 1	0.0457
Picture vocabulary: Specific cognitive ability	Factor 1	0.0829
Prospective memory: Initial answer	Factor 1	-0.0261
(log)Reaction time	Factor 2	-0.005
Fluid intelligence score	Factor 2	0.3065
Numeric memory: Maximum digits remembered correctly	Factor 2	0.1194
(log)Trail making test: Duration to complete numeric path	Factor 2	0.0705
(log)Trail making test: Duration to complete alphabetic path	Factor 2	-0.0458
Symbol digit substitution: Number of correct matches	Factor 2	0.1725
Paired associate learning: Number of correct pairs	Factor 2	0.0545
Tower rearranging: Number of puzzles correct	Factor 2	0.5807
Matrix pattern completion: Number of puzzles correct	Factor 2	0.3989
(logx+1)Pairs matching: Incorrect matches	Factor 2	-0.2908
Picture vocabulary: Specific cognitive ability	Factor 2	-0.0443
Prospective memory: Initial answer	Factor 2	0.1318
(log)Reaction time	Factor 3	0.0528
Fluid intelligence score	Factor 3	0.5764
Numeric memory: Maximum digits remembered correctly	Factor 3	0.3227
(log)Trail making test: Duration to complete numeric path	Factor 3	-0.0134
(log)Trail making test: Duration to complete alphabetic path	Factor 3	-0.1743
Symbol digit substitution: Number of correct matches	Factor 3	-0.0791
Paired associate learning: Number of correct pairs	Factor 3	0.0679
Tower rearranging: Number of puzzles correct	Factor 3	0.0156
Matrix pattern completion: Number of puzzles correct	Factor 3	0.1538
(logx+1)Pairs matching: Incorrect matches	Factor 3	0.0659
Picture vocabulary: Specific cognitive ability	Factor 3	0.5453
Prospective memory: Initial answer	Factor 3	-0.017
(log)Reaction time	Factor 4	-0.0774
Fluid intelligence score	Factor 4	0.0091
Numeric memory: Maximum digits remembered correctly	Factor 4	-0.0204
(log)Trail making test: Duration to complete numeric path	Factor 4	0.0068
(log)Trail making test: Duration to complete alphabetic path	Factor 4	0.0137
Symbol digit substitution: Number of correct matches	Factor 4	0.0714
Paired associate learning: Number of correct pairs	Factor 4	0.4244
Tower rearranging: Number of puzzles correct	Factor 4	-0.017
Matrix pattern completion: Number of puzzles correct	Factor 4	0.1536
(logx+1)Pairs matching: Incorrect matches	Factor 4	-0.0364
Picture vocabulary: Specific cognitive ability	Factor 4	0.219
Prospective memory: Initial answer	Factor 4	0.2876
Goodness-of-fit indices for the CFA model.
Estimator	ML
Optimization method	NLMINB
Number of model parameters	48
Number of observations	16861
Test statistic (User Model)	1238.82
Degrees of freedom (User Model)	30
P-value (User Model)	0
Test statistic (Baseline Model)	36952
Degrees of freedom (Baseline Model)	66
P-value (Baseline Model)	0
CFI	0.967
TLI	0.928
Loglikelihood H0	-269240
Loglikelihood H1	-268621
AIC	538576
BIC	538947
SABIC	538795
RMSEA	0.049
RMSEA CI lower	0.047
RMSEA CI upper	0.051
RMSEA p(RMSEA ≤ .05)	0.781
RMSEA p(RMSEA ≥ .08)	0
SRMR	0.026
Standardized factor loadings from the ESEM analysis.
Factor	Indicator	Estimate	Std.Err	z-value	P(>|z|)	Std.lv	Std.all
F1	log_RT	0.203	0.009	22.455	0	0.254	0.254
F1	FIS	-0.039				-0.049	-0.048
F1	Nmrc.mmry.M...	-0.089	0.008	-10.847	0	-0.112	-0.112
F1	lg_TMT.Drt....	0.705				0.882	0.856
F1	lg_TMT.Drt....	0.364	0.01	37.311	0	0.456	0.456
F1	SDS.Nmb.f.....	-0.312	0.01	-32.353	0	-0.39	-0.39
F1	PAL.Nmb.f.w...	-0.062				-0.078	-0.078
F1	Twr.rrrng.N...	0.005				0.006	0.006
F1	Mtrx.PC..N....	-0.114	0.008	-13.755	0	-0.142	-0.142
F1	lg1_P..I....2.	0.106	0.009	12.135	0	0.132	0.132
F1	Pctr.vcb.Spc..	0.109	0.008	13.507	0	0.137	0.137
F1	Prsp.mmry.Int.	-0.036	0.009	-4.223	0	-0.045	-0.045
F2	log_RT	-0.156	0.01	-15.616	0	-0.19	-0.19
F2	FIS	0.306				0.374	0.37
F2	Nmrc.mmry.M...	0.191	0.009	20.209	0	0.233	0.233
F2	lg_TMT.Drt....	0.07				0.085	0.083
F2	lg_TMT.Drt....	-0.312	0.01	-32.746	0	-0.38	-0.381
F2	SDS.Nmb.f.....	0.311	0.01	30.478	0	0.379	0.38
F2	PAL.Nmb.f.w...	0.055				0.067	0.067
F2	Twr.rrrng.N...	0.581				0.709	0.677
F2	Mtrx.PC..N....	0.288	0.009	30.304	0	0.351	0.351
F2	lg1_P..I....2.	-0.188	0.01	-18.856	0	-0.23	-0.23
F2	Pctr.vcb.Spc..	0.027	0.01	2.776	0.005	0.032	0.032
F2	Prsp.mmry.Int.	0.13	0.01	13.071	0	0.159	0.159
F3	log_RT	0.055	0.01	5.353	0	0.058	0.058
F3	FIS	0.576				0.614	0.608
F3	Nmrc.mmry.M...	0.269	0.01	25.7	0	0.286	0.286
F3	lg_TMT.Drt....	-0.013				-0.014	-0.013
F3	lg_TMT.Drt....	-0.101	0.009	-11.022	0	-0.107	-0.107
F3	SDS.Nmb.f.....	-0.08	0.01	-8.296	0	-0.086	-0.086
F3	PAL.Nmb.f.w...	0.068				0.072	0.072
F3	Twr.rrrng.N...	0.016				0.017	0.016
F3	Mtrx.PC..N....	0.175	0.01	17.352	0	0.187	0.187
F3	lg1_P..I....2.	0.041	0.01	3.983	0	0.044	0.044
F3	Pctr.vcb.Spc..	0.522	0.012	42.116	0	0.556	0.557
F3	Prsp.mmry.Int.	0.039	0.011	3.692	0	0.042	0.042
F4	log_RT	-0.048	0.013	-3.687	0	-0.056	-0.056
F4	FIS	0.009				0.01	0.01
F4	Nmrc.mmry.M...	0.032	0.013	2.502	0.012	0.037	0.037
F4	lg_TMT.Drt....	0.007				0.008	0.008
F4	lg_TMT.Drt....	-0.041	0.012	-3.483	0	-0.047	-0.047
F4	SDS.Nmb.f.....	0.069	0.012	5.567	0	0.081	0.081
F4	PAL.Nmb.f.w...	0.424				0.493	0.493
F4	Twr.rrrng.N...	-0.017				-0.02	-0.019
F4	Mtrx.PC..N....	0.161	0.013	12.588	0	0.188	0.187
F4	lg1_P..I....2.	-0.052	0.013	-3.899	0	-0.06	-0.06
F4	Pctr.vcb.Spc..	0.19	0.013	14.464	0	0.222	0.222
F4	Prsp.mmry.Int.	0.213	0.014	15.2	0	0.248	0.248
g	F1	-0.751	0.018	-41.131	0	-0.601	-0.601
g	F2	0.7	0.02	34.197	0	0.574	0.574
g	F3	0.37	0.021	17.961	0	0.347	0.347
g	F4	0.595	0.027	21.681	0	0.511	0.511
Variance estimates from the CFA of the g-factor model.
Variable	Estimate	Std.Err	z-value	P(>|z|)	Std.lv	Std.all
g	1				1	1
.log_RT	0.856	0.01	87.081	0	0.856	0.856
.FIS	0.381	0.009	42.887	0	0.381	0.373
.Nmrc.mmry.M...	0.783	0.009	84.998	0	0.783	0.781
.lg_TMT.Drt....	0.327	0.013	25.591	0	0.327	0.308
.lg_TMT.Drt....	0.452	0.007	68.782	0	0.452	0.452
.SDS.Nmb.f.....	0.579	0.008	70.519	0	0.579	0.58
.PAL.Nmb.f.w...	0.678	0.01	64.918	0	0.678	0.677
.Twr.rrrng.N...	0.599	0.01	59.724	0	0.599	0.546
.Mtrx.PC..N....	0.65	0.008	78.945	0	0.65	0.648
.lg1_P..I....2.	0.898	0.01	87.499	0	0.898	0.898
.Pctr.vcb.Spc..	0.618	0.012	52.097	0	0.618	0.619
.Prsp.mmry.Int.	0.868	0.011	79.744	0	0.868	0.867
.F1	1				0.639	0.639
.F2	1				0.671	0.671
.F3	1				0.88	0.88
.F4	1				0.738	0.738

## Sheet: Figure 2b
Scatterplot of the observed g-factor and g-factor predicted from mental health indices with PLSR. Out-of-sample predictive performance of the PLSR model is evaluated with Pearson r and R2 averaged across five folds.
Predicted g-factor	Observed g-factor	Fold
0.0810724	-0.0770193	0
0.337288	0.589946	0
0.0165049	-0.88139	0
-0.170316	0.1839	0
0.0521671	0.725558	0
0.151562	-0.0772053	0
-0.157216	-0.97737	0
0.098157	-1.86751	0
-0.12508	0.480947	0
0.0625658	-1.00296	0
0.258887	0.565255	0
0.167843	0.924356	0
0.223443	-0.313423	0
0.0100403	-0.223692	0
-0.255236	0.166709	0
0.0290446	0.247391	0
-0.113686	0.262983	0
0.26469	-0.699469	0
0.0909342	0.118163	0
0.372708	0.419596	0
0.461478	0.833165	0
0.233833	0.752183	0
0.387961	1.26111	0
-0.185902	1.09629	0
-0.155174	-0.252904	0
0.072825	0.331401	0
-0.563864	-1.1445	0
-0.0975127	-0.53572	0
-0.216132	-0.107492	0
0.242373	0.330432	0
-0.0987488	0.125698	0
0.269142	-0.0123313	0
-0.106889	-0.907726	0
0.358405	0.535503	0
0.0928897	-1.13868	0
-0.0896366	0.490626	0
-0.473181	0.185115	0
0.235863	-0.443202	0
0.298244	0.317515	0
0.155119	0.799783	0
-0.497548	-1.37206	0
-0.489302	-1.45384	0
0.513214	1.21819	0
-0.424128	-0.802248	0
0.154789	0.256373	0
0.0242039	0.556788	0
-0.0265462	-0.345361	0
0.3915	0.337994	0
0.516024	0.897076	0
0.011238	0.105305	0
0.177797	-0.172483	0
0.232411	1.30645	0
-0.235865	-0.59144	0
-0.156945	0.54163	0
0.223479	0.692534	0
-0.159833	0.324481	0
0.327501	0.221176	0
0.398791	-0.331171	0
0.528235	0.68862	0
-0.0295201	0.84908	0
0.266503	0.391809	0
0.364882	-0.17226	0
0.201925	0.377728	0
-0.200866	-0.893925	0
0.187405	-0.801776	0
0.0575787	-0.107549	0
0.3334	0.581161	0
0.366693	0.543699	0
-0.00324137	0.915111	0
0.284046	0.0998079	0
0.107554	-0.12188	0
0.00234234	0.71351	0
-0.00795716	0.383399	0
-0.0211124	0.0449724	0
0.269861	0.762646	0
0.0154127	-0.114426	0
0.484859	1.94554	0
0.0181591	0.726132	0
0.151663	0.647353	0
0.123181	1.26085	0
0.407771	0.427639	0
0.209261	-0.246978	0
-0.0458524	0.418236	0
0.665564	0.899345	0
-0.388021	-0.498583	0
0.567336	-0.149829	0
-0.0874272	-0.111017	0
-0.292229	-0.848507	0
-0.0622254	0.847955	0
0.615619	0.960396	0
-0.100179	-0.556237	0
-0.0720822	0.0232584	0
0.0677714	-1.11399	0
-0.24334	-0.779997	0
0.613022	0.837622	0
0.362454	-0.564932	0
0.0653925	0.401218	0
0.108598	-1.17883	0
0.145754	0.608036	0
0.175214	1.32781	0
0.0124112	0.7464	0
-0.244617	-0.441479	0
0.0363933	0.168373	0
-0.068558	-0.253343	0
0.0379341	-0.531964	0
-0.250677	0.0945439	0
-0.174927	0.0278227	0
0.187767	-0.502505	0
-0.063852	0.137334	0
0.183272	-0.505234	0
0.42387	0.848463	0
0.238126	-0.33178	0
0.0758869	-0.29783	0
0.12824	0.0633595	0
0.187869	0.50425	0
-0.265986	-1.23979	0
-0.0484463	-0.40295	0
-0.344894	-0.33752	0
0.0438675	0.361516	0
0.195571	0.356447	0
0.112831	-0.00848329	0
0.127798	0.245156	0
-0.23187	-1.14295	0
0.180679	-0.0479142	0
0.123865	0.0678991	0
0.155791	0.489592	0
0.455132	0.300554	0
0.5941	0.478395	0
0.323591	-0.968362	0
0.306399	0.44424	0
-0.0990457	0.479729	0
0.147704	-0.678187	0
0.488593	0.435715	0
0.339963	0.895367	0
0.467789	-0.966144	0
0.221669	0.383501	0
-0.0773414	-0.0146678	0
0.0658468	0.6073	0
0.0997279	-0.045832	0
0.233167	-0.0023385	0
-0.12037	-0.0837747	0
0.0143685	-1.24311	0
-0.0611183	0.138612	0
8.87315e-05	-1.23604	0
-0.11534	-0.211268	0
0.292008	1.00656	0
0.184156	0.0574311	0
-0.314218	0.329123	0
0.20604	0.587886	0
0.441672	0.518365	0
-0.233757	-0.704665	0
-0.282422	-0.855165	0
0.525316	0.474226	0
0.0818709	0.549746	0
0.351808	1.7018	0
0.22389	0.492679	0
-0.14005	-0.288533	0
0.227218	0.00832465	0
0.0579116	0.102113	0
0.302356	-0.147098	0
-0.3273	0.486744	0
-0.268138	-0.235104	0
0.0216063	0.202571	0
-0.0626479	0.598002	0
0.20814	0.348212	0
-0.505429	0.573775	0
-0.205844	-0.278601	0
0.218315	0.573166	0
0.263254	-0.258605	0
-0.175842	-0.0907084	0
-0.15145	-0.558237	0
0.169796	-0.31192	0
-0.0854847	0.827064	0
0.197168	0.288114	0
-0.107716	0.858762	0
-0.437441	0.627751	0
0.0904366	0.140811	0
0.303919	0.767124	0
0.379236	-0.134294	0
0.533238	-0.0371061	0
-0.298355	-0.639781	0
-0.298657	0.766001	0
-0.0190112	-1.58508	0
0.30115	0.203561	0
-0.15917	0.104474	0
0.323034	0.43623	0
0.359648	0.250586	0
-0.0533106	0.562897	0
0.271096	0.243868	0
0.114259	1.10135	0
-0.151633	-0.446941	0
0.171426	0.615534	0
-0.172686	0.505724	0
-0.220346	0.103062	0
0.176909	0.0279803	0
0.0879523	-0.0222073	0
0.245152	-0.28517	0
0.384279	0.89939	0
-0.221253	-0.0524474	0
0.512513	0.516212	0
0.21855	-0.758379	0
-0.439041	-0.109749	0
-0.10524	-0.322383	0
0.278425	-0.666856	0
0.184722	1.00071	0
0.0872298	0.78924	0
0.0276307	-0.183918	0
-0.17858	0.356878	0
-0.273075	-0.109372	0
0.54823	0.511401	0
0.375334	0.812146	0
-0.514567	-1.40808	0
0.039887	0.563953	0
-0.00126991	0.229834	0
0.382043	-0.893199	0
0.368566	1.44331	0
-0.0737425	-0.215795	0
0.0883483	0.100374	0
-0.343861	0.927371	0
-0.146205	-0.288674	0
-0.00590946	0.445536	0
-0.0506216	-1.86927	0
0.138726	1.01447	0
-0.0765811	0.156469	0
-0.294862	-1.32878	0
-0.112586	1.096	0
0.240112	0.467526	0
-0.395442	-0.85854	0
-0.141772	0.0778916	0
-0.0160083	-0.0300286	0
0.0794837	0.0468806	0
0.477981	1.06115	0
-0.0338495	0.715576	0
0.0479762	-0.569668	0
-0.0712937	-0.210183	0
0.278182	0.690851	0
-0.3428	0.178989	0
0.10155	-0.0746383	0
0.109536	0.429251	0
0.17535	-0.194918	0
0.547026	0.024088	0
0.132288	-0.271808	0
0.345369	-0.94974	0
0.0952428	-0.0288615	0
-0.33179	-0.178276	0
0.244529	-0.389178	0
0.23969	-0.254114	0
0.288617	-0.23121	0
0.257214	-0.289456	0
-0.259961	-0.297628	0
0.35199	-0.695096	0
0.168599	0.54157	0
-0.462282	-0.0108397	0
-0.131555	1.21796	0
-0.135518	-1.02396	0
0.0331506	-0.155589	0
0.231503	-0.713166	0
-0.212149	0.616186	0
-0.105136	-0.517784	0
0.341292	1.11447	0
0.130037	1.26134	0
-0.0223891	-0.563994	0
-0.244541	-0.585436	0
-0.251728	-0.0831186	0
0.172359	0.562994	0
0.293151	0.365151	0
-0.53842	0.237458	0
-0.0758466	-0.194623	0
0.0101706	0.654815	0
0.191032	0.018709	0
0.0590569	0.570701	0
-0.117954	-0.145492	0
-0.188365	0.331079	0
0.282729	0.991135	0
0.0919025	0.334136	0
0.285829	-0.512078	0
0.165758	-0.157736	0
0.0871444	0.858376	0
0.160142	1.36478	0
-0.042363	0.394223	0
-0.168471	0.833692	0
-0.214391	0.885907	0
-0.596889	0.178222	0
0.082608	0.787945	0
-0.261485	-0.130674	0
-0.0771605	-0.432906	0
0.268208	-0.653459	0
-0.291567	-0.378855	0
0.129867	-0.0969709	0
-0.0795799	1.10374	0
0.156882	0.612128	0
0.212138	0.929455	0
-0.00101238	-0.618658	0
0.0805345	-0.60621	0
0.311175	0.616572	0
0.0803965	-0.953298	0
0.429636	0.28896	0
-0.0772524	0.443276	0
-0.119807	-0.683562	0
0.28501	0.873114	0
0.0735945	-0.450344	0
-0.051965	0.518508	0
-0.00844005	-0.112238	0
0.381614	0.581381	0
0.11158	0.140389	0
-0.049128	-1.25905	0
0.260888	-0.392294	0
0.000306509	0.417697	0
0.0987752	0.907524	0
-0.148443	-0.936363	0
-0.161257	-0.760436	0
0.0818921	-0.324182	0
0.261447	-0.121626	0
-0.0558643	-0.494935	0
-0.0375849	0.568624	0
0.132843	0.00464745	0
-0.643508	-0.289068	0
-0.123094	-0.291055	0
-0.0373926	-0.941189	0
0.187976	-0.103859	0
0.12813	-0.047955	0
0.583487	0.377645	0
0.23109	1.5117	0
-0.169959	0.68149	0
-0.0116877	0.266233	0
0.499202	0.567323	0
0.531041	0.690953	0
0.0709773	0.0203531	0
0.65798	1.23161	0
-0.00999571	-0.613356	0
0.253652	0.417488	0
-0.437963	0.309731	0
0.405453	-0.081706	0
0.0811868	1.38227	0
0.0229509	-0.197988	0
-0.263567	-1.22319	0
-0.17783	0.246518	0
0.117052	-0.448612	0
-0.0766379	0.651348	0
-0.102336	-0.253577	0
-0.151591	0.0255857	0
-0.0233887	0.58864	0
0.09335	0.344067	0
-0.304374	-1.27764	0
0.482272	0.692162	0
0.209847	0.112518	0
0.0993257	-0.209245	0
0.268523	0.75682	0
0.491421	0.442547	0
0.32636	1.28	0
-0.381104	0.0735508	0
0.117206	-0.53288	0
0.171994	-0.118627	0
0.322005	0.444884	0
-0.17282	-0.795333	0
0.115585	-0.570833	0
-0.0697104	-0.1124	0
-0.263076	-0.69443	0
0.0675884	0.395798	0
0.102613	-0.653425	0
-0.167934	-0.479298	0
-0.0720989	-0.309774	0
0.0557486	-0.160964	0
0.260701	0.707958	0
0.0747271	-0.64896	0
-0.0783141	-0.439424	0
-0.021963	1.14442	0
-0.118704	-0.742637	0
-0.284	0.856034	0
0.265823	0.0807957	0
0.103297	-0.205015	0
-0.110158	-1.47198	0
-0.217334	0.365603	0
0.392242	-0.105397	0
0.00873265	0.664711	0
-0.0338326	-0.576274	0
0.189943	0.212172	0
0.0229215	-1.71753	0
-0.129932	-1.45108	0
0.418817	1.21802	0
-0.141693	-0.66843	0
-0.0756217	-0.459982	0
0.298287	0.679005	0
0.285766	1.09226	0
0.0102282	-0.463362	0
0.163569	0.991755	0
-0.147908	0.399431	0
-0.0069207	0.486795	0
0.0558147	-0.0868317	0
0.0162634	-0.436504	0
0.131107	0.347411	0
0.286537	0.166936	0
0.329816	-0.450355	0
0.0481046	-0.228273	0
0.240277	-0.129418	0
0.0676777	0.13437	0
0.134903	-0.0296126	0
0.191575	-1.74146	0
0.0564896	0.0921466	0
0.274154	0.188022	0
-0.0161227	-0.224758	0
0.128955	-0.745571	0
-0.0874711	-0.565118	0
-0.273073	0.123788	0
-0.00233576	-0.119659	0
0.0357558	0.451427	0
0.343815	0.402642	0
0.137679	0.771202	0
0.280073	-0.501555	0
0.0468302	0.846394	0
0.129427	1.0302	0
-0.27473	1.42724	0
0.416031	0.662213	0
-0.153907	-0.363983	0
0.466354	1.10575	0
0.17113	0.729871	0
0.0865466	1.25788	0
0.220242	0.115964	0
0.135469	1.00423	0
0.25643	-0.327579	0
0.107953	1.53856	0
-0.102895	0.998123	0
-0.330235	0.0383895	0
-0.182483	-1.0124	0
-0.119076	0.0679797	0
0.262309	1.17986	0
0.130081	0.619679	0
0.161201	-0.309456	0
0.50302	-0.170407	0
0.359375	0.135002	0
-0.100094	-1.64928	0
-0.460091	-0.804458	0
-0.192705	0.832361	0
-0.0354197	0.0459071	0
0.467223	0.403335	0
0.000473719	0.727482	0
0.352431	0.377001	0
0.0306456	0.0995727	0
0.282737	-0.225468	0
0.272305	0.28315	0
0.498169	1.23715	0
0.150472	0.348381	0
0.335676	0.356762	0
0.343114	0.80128	0
-0.0856938	0.219499	0
-0.247129	0.705591	0
0.247261	0.83968	0
0.204984	0.561542	0
-0.0619759	0.295611	0
0.13618	0.0674883	0
0.157356	0.0647748	0
0.0556347	1.29169	0
0.202628	-0.659901	0
0.281672	-0.163051	0
-0.0478075	-0.567718	0
0.572028	0.613617	0
-0.0573991	-0.990527	0
0.103054	0.810837	0
-0.775282	-2.2937	0
0.533955	0.393028	0
-0.210833	-0.624286	0
0.0158921	-0.929582	0
0.4144	-1.09844	0
-0.148077	-0.572332	0
-0.865112	-0.72615	0
0.307337	0.318323	0
0.225877	0.404377	0
0.0769344	0.599896	0
-0.0393386	-0.694774	0
-0.131561	0.157487	0
-0.106332	-0.522709	0
-0.111081	0.655491	0
-0.657552	-0.25218	0
-0.689169	-0.247626	0
-0.0269023	1.18445	0
0.247976	-0.163673	0
0.278663	0.739247	0
0.388931	0.591354	0
0.237029	0.089381	0
0.205741	0.424946	0
0.266274	1.49425	0
0.334314	0.145348	0
0.128163	1.27007	0
-0.156688	-0.910215	0
0.704342	1.49521	0
-0.0408254	0.66031	0
-0.15899	-1.01763	0
0.20886	-1.87787	0
0.169107	0.0350152	0
0.0631375	0.47912	0
-0.0340882	0.308472	0
-0.155528	0.196983	0
0.00834147	-0.117717	0
0.273053	0.172743	0
0.305226	0.118507	0
0.178023	0.484686	0
-0.0562352	0.97287	0
0.0594543	0.729784	0
-0.0732138	-1.05397	0
0.402491	0.118581	0
-0.198069	-0.113995	0
0.104421	-0.188722	0
0.115779	-0.140864	0
-0.170163	-0.31601	0
0.947646	1.08724	0
-0.127381	-0.267209	0
0.117019	-0.231175	0
0.568817	0.865235	0
-0.588058	-0.373703	0
-0.0638903	-0.803258	0
0.0349599	1.31693	0
0.260042	-0.795709	0
0.0412951	1.28343	0
0.0141778	0.230252	0
0.362133	0.789853	0
0.0627556	-0.45649	0
0.133887	0.690685	0
0.0822977	0.878298	0
-0.104586	0.190436	0
0.166273	1.466	0
0.456876	1.04244	0
0.107577	0.818842	0
-0.155665	0.711552	0
0.127567	0.641081	0
0.272849	0.411348	0
-0.306374	-1.47422	0
-0.274243	-0.385947	0
-0.0686387	-1.25039	0
0.0437045	0.335299	0
-0.26424	-0.158017	0
-0.362159	0.57194	0
0.428191	1.42316	0
0.193793	-0.194637	0
0.239641	-0.127453	0
-0.0783774	-0.088305	0
0.330209	0.53893	0
0.090959	-0.0271229	0
0.0815139	-1.845	0
0.316041	-0.20783	0
-0.107968	0.149688	0
0.258167	-1.02294	0
0.154288	-0.258221	0
-0.483391	-1.32882	0
0.0658012	-0.929873	0
0.169738	0.561496	0
-0.304096	-0.286012	0
0.47596	0.740361	0
0.120404	0.701518	0
-0.105566	-1.37127	0
0.405124	0.0932596	0
0.159379	0.0045552	0
0.0328284	-0.898199	0
-0.322519	-1.21259	0
0.474702	0.572497	0
0.290007	0.242034	0
-0.0561286	-0.149223	0
0.113957	0.40415	0
0.254726	1.48355	0
-0.620527	0.211494	0
0.0394552	-0.0140727	0
0.295209	0.336371	0
-0.083511	0.261693	0
-0.230814	-0.269049	0
-0.359765	-0.264364	0
-0.0765828	-0.438343	0
0.164978	0.596869	0
-0.0955845	-1.51859	0
0.151912	0.075472	0
-0.0136101	-0.347351	0
-0.221164	0.539697	0
0.0855001	1.15812	0
0.492208	-1.33226	0
0.224024	-0.0810303	0
-0.110736	-1.2841	0
0.482573	0.146679	0
0.152934	0.311667	0
0.0101406	-0.548356	0
-0.276572	0.210825	0
0.0876091	0.426661	0
0.137379	-0.272599	0
0.376066	0.381763	0
-0.382607	-0.242657	0
0.673463	0.118752	0
-0.192192	0.199567	0
-0.155286	-1.59755	0
0.185632	-0.591863	0
0.042958	0.405774	0
0.340106	0.386276	0
-0.0639764	0.609951	0
0.0970617	-0.975246	0
-0.165826	-0.615265	0
0.230514	0.408135	0
0.460433	0.57604	0
-0.0737534	0.0311206	0
-0.112754	-1.78995	0
0.111187	-0.0242633	0
0.231204	-2.26761	0
-0.58273	0.324796	0
-0.135114	1.34377	0
-0.173768	0.0106696	0
0.00917426	0.300818	0
-0.197298	-0.804742	0
0.4194	0.575294	0
0.0270219	-0.871957	0
0.178142	-0.11499	0
0.0686689	1.15259	0
0.340726	0.795483	0
0.0615694	0.688396	0
0.0687412	0.519915	0
0.100779	-0.13544	0
-0.0421356	0.564512	0
-0.241723	-0.905406	0
-0.0307558	-0.0518814	0
-0.0654269	0.0032848	0
-0.151544	-0.634608	0
-0.0201771	0.145384	0
0.155955	1.04616	0
0.329838	-0.143323	0
-0.854118	0.0601277	0
-0.0879091	-1.08923	0
-0.058564	-0.0832913	0
0.101738	0.636478	0
-0.00572303	0.23941	0
-0.305512	-0.0740105	0
0.323889	0.255535	0
-0.0571994	0.782899	0
-0.361875	-1.20995	0
-0.188921	0.41955	0
0.000614136	0.300642	0
0.421495	0.184555	0
-0.187474	-0.907302	0
-0.0106166	0.226088	0
0.0147511	-0.211135	0
0.322647	0.324606	0
0.371687	0.445219	0
-0.196151	-0.772058	0
0.191278	0.800577	0
-0.0304107	0.838329	0
0.206907	0.586013	0
-0.00676586	0.271103	0
0.00424073	-0.323148	0
0.0669709	0.133298	0
0.265755	0.185938	0
0.116561	0.296487	0
0.246422	-0.431034	0
0.403294	0.192648	0
0.346983	-0.170602	0
-0.152866	0.195925	0
0.158343	0.176144	0
-0.227072	0.433293	0
-0.261824	-0.586964	0
0.150351	-0.475867	0
-0.207384	-0.275681	0
-0.265202	-0.388391	0
-0.0279184	-1.31566	0
-0.16574	-0.197769	0
-0.146868	-0.272361	0
0.852289	1.04468	0
0.224648	0.897191	0
-0.144197	-0.388901	0
0.0262927	1.41951	0
0.0808304	0.798201	0
0.203093	1.16256	0
0.181704	0.970949	0
0.295554	0.521655	0
0.0886606	-0.199851	0
0.328854	0.496952	0
-0.129982	-0.614045	0
0.0371621	-0.597649	0
-0.000698465	-0.311515	0
-0.125986	-1.37058	0
0.11816	0.375784	0
-0.264927	0.481081	0
0.149212	0.512019	0
-0.151111	-0.8223	0
-0.20226	0.392499	0
0.193266	-0.783471	0
0.228456	-0.188559	0
-0.759902	0.591375	0
0.395792	-0.10705	0
-0.10381	-1.06389	0
-0.00186512	0.0932895	0
0.436088	0.0284947	0
0.397172	0.699224	0
0.283319	0.469577	0
0.230795	-0.334268	0
0.447836	1.06222	0
0.115416	0.20879	0
0.399864	0.669071	0
0.341918	0.379783	0
0.153251	-0.0352631	0
-0.163931	-0.433781	0
0.285497	-0.415265	0
0.169902	0.864732	0
-0.0819908	-0.510027	0
-0.976415	-0.975289	0
0.110101	-0.810673	0
-0.294128	-0.349732	0
-0.0274095	0.844508	0
-0.0998255	-0.646267	0
0.00597177	0.577139	0
0.167991	0.495967	0
-0.184674	0.625815	0
-0.203058	-0.0906335	0
-0.145949	-0.101961	0
0.000362916	0.160253	0
0.0454525	0.320745	0
0.469892	0.686032	0
0.0187697	-1.17454	0
0.330204	0.165764	0
-0.101814	0.221859	0
0.138083	0.358682	0
-0.231064	0.851155	0
0.442178	0.451859	0
0.141071	0.208718	0
-0.0699737	0.207211	0
0.0340316	-0.254923	0
0.0876602	-0.982194	0
0.00461537	0.0802848	0
-0.623612	-0.952497	0
-0.0930696	-1.21142	0
8.10737e-05	0.331511	0
0.241203	-0.638665	0
-0.326041	0.448651	0
-0.0699449	-1.77244	0
-0.011243	-0.483208	0
0.027751	-0.0700899	0
0.139933	0.659069	0
0.0116313	-0.402729	0
0.487391	-0.170009	0
0.0741384	-1.07277	0
0.177531	-0.32424	0
-0.161225	-0.232832	0
0.508171	-0.0530682	0
-0.0967106	1.21807	0
0.0937372	-0.388541	0
-0.412477	-0.425863	0
0.124222	1.5101	0
0.222154	0.328127	0
0.108052	0.534642	0
-0.0850698	-0.175983	0
-0.187665	1.06757	0
0.314601	-0.890385	0
-0.070831	-0.363934	0
-0.0251654	0.328393	0
-0.260166	-0.00269701	0
0.288743	1.36476	0
0.0198701	-0.426308	0
-0.00237535	1.29877	0
0.381559	0.467756	0
-0.629512	-0.503057	0
-1.27414	-0.964016	0
0.0360502	-0.52548	0
0.290302	-0.465596	0
0.469082	0.776526	0
0.20075	1.58201	0
0.439098	1.11849	0
-0.165727	-1.05906	0
-0.177058	-0.143694	0
0.0141221	-0.574402	0
0.0391196	1.63762	0
0.188317	0.591053	0
-0.079674	0.55341	0
0.227042	0.835986	0
0.486567	-0.245354	0
0.235777	0.828957	0
-0.282898	-0.772109	0
0.208372	-0.279819	0
0.291942	1.17995	0
0.157523	0.102778	0
0.042235	0.154486	0
-0.134934	-0.254102	0
0.163726	0.860909	0
0.187321	-0.402346	0
0.197853	-0.72871	0
-0.161212	-0.195309	0
0.295993	-0.478829	0
-0.18703	0.170285	0
-0.324467	-1.85613	0
-0.200953	0.355748	0
0.147549	-0.0231991	0
0.205157	0.593508	0
-0.182936	-1.24511	0
0.14465	-0.239578	0
0.243383	-0.713969	0
0.00302717	-0.576163	0
-0.309158	-0.120411	0
-0.0994522	0.273103	0
0.129948	0.284144	0
0.114149	0.680277	0
-0.092844	-0.689767	0
0.11774	0.484913	0
0.252439	0.0393643	0
0.258912	0.200768	0
0.447274	0.157173	0
-0.0716426	-0.146586	0
0.135315	1.68565	0
0.0886333	0.127043	0
-0.121746	0.0326309	0
0.0760855	0.03448	0
0.17279	0.525263	0
0.128384	-0.626864	0
-0.026206	-1.18125	0
-0.346702	-0.872599	0
-0.601838	0.191515	0
0.123083	0.193075	0
0.397139	0.763026	0
0.205552	-0.1695	0
0.40547	0.21621	0
0.397339	0.0342322	0
-0.244281	0.193388	0
-0.621043	-0.360669	0
-0.437261	-0.644514	0
-0.0262415	-0.42165	0
0.0417875	1.13594	0
-0.00379767	-0.741707	0
0.337172	0.224441	0
-0.263899	-1.13385	0
0.119975	0.804553	0
-0.371057	0.643832	0
0.386364	1.12889	0
0.109045	1.26066	0
-0.0557686	0.387112	0
0.0827576	-0.929815	0
0.152289	-1.27396	0
-0.0555948	-0.421228	0
0.00969972	0.125471	0
0.0709841	0.0187626	0
0.544765	0.249887	0
-0.00331149	0.264134	0
0.691513	-0.735117	0
-0.0602299	-0.65182	0
-0.457877	0.276122	0
-0.0750048	0.240939	0
0.341889	-0.636002	0
0.410187	0.850826	0
-0.182555	0.407484	0
0.119956	-0.722939	0
-0.233537	0.591427	0
0.227104	-0.108363	0
0.270229	0.13328	0
-0.14579	0.120028	0
0.0608075	-0.533187	0
0.0551082	-0.18952	0
0.159186	-0.116832	0
-0.161827	1.24925	0
-0.239447	-0.640587	0
-0.527731	-0.848409	0
0.0523322	0.771159	0
-0.00239189	-0.35405	0
-0.302379	-0.238144	0
0.3365	0.594478	0
0.140317	-0.615788	0
0.568658	1.67604	0
-0.308321	0.290645	0
0.0714553	0.0100382	0
-0.0478813	-0.858843	0
-0.112688	0.870903	0
-0.221312	-1.77924	0
-0.391138	-0.562959	0
0.124835	-0.00342517	0
-0.000535725	-0.373281	0
-0.336512	0.10975	0
0.217382	0.545175	0
0.0915838	-0.830253	0
0.216602	0.0860987	0
0.0757121	0.0779714	0
0.28373	0.98376	0
0.00257563	0.110619	0
0.517611	-0.0305334	0
-0.0538249	0.446327	0
-0.103007	-0.870874	0
0.618176	0.379545	0
-0.031975	-0.0979416	0
0.262317	0.474924	0
0.313811	-0.494292	0
0.0233645	0.29785	0
0.0851765	-1.08481	0
-0.19782	-0.136105	0
-0.0231349	0.984999	0
0.243748	-0.395674	0
-0.193225	0.0487184	0
-0.487556	0.00372986	0
0.270048	0.237285	0
0.229139	0.185565	0
-0.512503	-1.68427	0
-0.0953954	0.0566744	0
0.414698	0.609116	0
-0.141812	0.570942	0
-0.0283737	0.597178	0
0.171346	-0.722548	0
0.00158962	0.315142	0
0.107635	0.58285	0
-0.0236696	-0.825093	0
-0.431009	0.0144792	0
0.0132888	-0.0718536	0
-0.171273	-0.523204	0
0.756605	1.37913	0
-0.0440969	0.0228354	0
0.0737798	0.293113	0
0.0109335	-0.449629	0
0.49499	0.665044	0
-0.344654	-0.0240491	0
0.624655	0.58921	0
0.486223	0.125223	0
0.333306	1.08709	0
0.0262852	0.416935	0
0.0662988	-0.438256	0
0.217782	0.947107	0
0.0136217	0.646146	0
0.215719	0.562446	0
0.214378	-0.0281982	0
0.310177	-0.777407	0
-0.000342205	1.22185	0
0.0810282	0.0750118	0
0.0844443	0.511223	0
0.315343	0.0936067	0
0.00296887	0.122992	0
0.0956289	0.457208	0
0.102208	-0.685554	0
0.228265	0.106766	0
-0.0213505	0.661435	0
-0.106387	-0.183504	0
-0.0915845	0.260743	0
0.0514139	-0.679135	0
0.193064	-0.420383	0
-0.00172466	0.228595	0
0.630722	0.79415	0
-0.0540152	0.0711449	0
0.0320414	1.31111	0
0.17762	0.587573	0
-0.036853	0.405684	0
-0.333013	-0.904522	0
-0.028331	0.200291	0
0.546833	0.0645988	0
-0.0594765	-0.732248	0
-0.373866	-1.16866	0
0.439175	-0.497153	0
0.247861	1.45066	0
0.0340841	0.453246	0
0.270469	0.470967	0
0.035726	0.550712	0
0.260716	-0.582886	0
-0.21002	-0.471284	0
-0.251155	-1.042	0
-0.293419	-0.185986	0
-0.0803306	0.719727	0
0.131277	-0.589091	0
-0.0232398	0.0359654	0
0.211312	0.593531	0
-0.0765258	-0.502708	0
-0.505673	-0.444651	0
0.491798	0.649376	0
-0.416456	-0.273836	0
-0.066594	0.605978	0
0.082411	-0.342803	0
0.259809	0.571203	0
0.0128509	-0.712603	0
0.454145	-0.369792	0
0.205278	-0.175155	0
-0.0318179	0.16453	0
0.234834	1.22398	0
0.218647	0.364386	0
0.133807	0.51971	0
-0.0658392	1.03845	0
0.0829342	-0.132554	0
0.143137	0.233446	0
0.0723128	0.198431	0
-0.0846716	0.137575	0
0.226682	0.617424	0
0.162019	0.369713	0
0.195211	-0.00148121	0
-0.260596	-1.59677	0
-0.538102	-0.695973	0
0.383643	-1.32955	0
-0.26221	0.248388	0
0.0125816	-0.3591	0
0.172295	-0.600145	0
0.0235121	1.05936	0
0.562209	-0.418185	0
0.259125	1.74584	0
0.279794	0.735239	0
0.411146	0.0138847	0
0.0584751	-0.598748	0
0.188483	-0.0231838	0
-0.221646	-0.840073	0
0.266338	0.10893	0
0.172211	1.21715	0
-0.192169	-0.829032	0
0.306442	-0.764767	0
-0.0755202	-0.525627	0
-0.0340924	-0.454013	0
0.574686	1.04151	0
-0.0186803	0.671993	0
0.330121	0.987639	0
0.0170475	0.472681	0
-0.164458	0.364969	0
0.629059	0.782317	0
0.254571	0.946243	0
-0.285819	-1.02465	0
-0.34244	-0.841027	0
0.467922	-0.185968	0
0.764576	0.184106	0
0.17677	0.587788	0
0.209901	-0.504434	0
-0.0575914	0.435933	0
0.472556	0.52939	0
-0.0468442	0.518836	0
0.308305	-0.47472	0
-0.260129	0.624178	0
0.472788	-0.115928	0
0.130683	-0.0134485	0
-0.0359803	0.217085	0
-0.0946593	0.398023	0
-0.58856	-1.91	0
-0.342435	-1.71698	0
-0.0178389	-0.52565	0
0.399012	0.546511	0
0.176165	-0.207261	0
0.37837	-1.09498	0
0.465107	0.380118	0
-0.117076	0.0774321	0
0.217422	-0.550339	0
0.0400042	-0.740461	0
-0.050097	-0.0716628	0
0.0898335	-0.248657	0
0.0491468	-0.333243	0
-0.0637471	0.203931	0
-0.0987568	-0.712708	0
-0.0337082	-1.2189	0
0.126792	0.706217	0
-0.276979	0.349476	0
-0.147025	-0.394778	0
0.122948	0.498625	0
0.493498	0.793147	0
0.255613	0.890748	0
-0.229438	-0.164493	0
0.169001	1.1142	0
0.119439	1.02117	0
0.194512	-0.491916	0
0.596416	1.28964	0
0.04509	-0.0426678	0
0.388091	0.589737	0
0.241556	0.276648	0
0.00120472	-0.155151	0
0.147704	-0.322491	0
0.126024	-0.684585	0
0.256525	-0.805903	0
0.244221	1.42584	0
0.223414	0.22651	0
0.406683	-0.33009	0
0.129181	0.548458	0
-0.174116	0.0229703	0
0.467221	-0.389842	0
-0.188237	-1.34335	0
-0.0411086	-0.132577	0
0.817244	1.69683	0
0.25729	-0.396625	0
0.0221395	0.76248	0
-0.00107886	0.774107	0
-0.0648886	-0.196612	0
-0.130081	0.93149	0
0.222218	0.0744018	0
-0.0960221	0.49127	0
0.249335	0.929047	0
0.175035	-0.474954	0
0.0482138	1.34633	0
0.844274	0.227036	0
-0.208926	-0.861728	0
-0.019797	-1.02273	0
0.145245	0.214654	0
-0.155618	-0.687669	0
-0.354366	-0.491869	0
-0.317	-0.256855	0
0.240264	-0.0802679	0
-0.0522261	0.882927	0
0.0523723	-0.773838	0
-0.138057	0.355224	0
8.73007e-05	0.439359	0
0.219057	0.397891	0
0.269493	-0.46539	0
-0.22123	-1.05432	0
0.0267068	0.821059	0
-0.194853	-0.105383	0
0.28144	1.42554	0
0.164699	-0.156827	0
0.403293	-0.38671	0
-0.186803	-0.943292	0
0.358984	1.05867	0
0.415413	0.491713	0
-0.13408	-0.406037	0
0.141295	-0.24462	0
0.53961	0.871895	0
0.255213	1.3401	0
0.097062	-0.0383672	0
-0.150482	1.04177	0
-0.0168735	-1.39642	0
0.0484091	0.182185	0
0.242914	0.609464	0
-0.00509039	-0.844804	0
-0.0203007	0.499934	0
-0.18423	-0.281709	0
0.00283006	-0.397962	0
0.209586	0.430603	0
-0.0364696	-1.0408	0
0.243923	-0.00315943	0
0.0642341	0.10582	0
-0.924939	-0.885698	0
-0.321188	-0.922413	0
0.0770565	-0.625294	0
0.324059	0.416385	0
0.443161	1.40487	0
0.545102	0.793259	0
-0.122337	0.7743	0
0.836134	-0.144158	0
-0.203658	0.326211	0
0.188788	0.182924	0
0.271366	-0.166165	0
0.190447	0.536475	0
-0.207251	-0.125196	0
0.00398582	-2.32142	0
0.590363	0.582338	0
0.48491	1.40092	0
0.0605599	-1.20222	0
0.0429968	0.122171	0
0.0884939	0.0587419	0
0.112279	-0.84873	0
-0.903777	-0.435904	0
0.186581	0.377567	0
-0.0267499	0.124653	0
0.252309	-0.26661	0
0.200364	1.25379	0
0.0471529	-0.528667	0
-0.112116	-0.009545	0
0.0028168	0.59604	0
0.15099	-0.454541	0
-0.122393	0.00173112	0
0.138798	-0.645775	0
-0.0521454	0.330839	0
0.565703	-0.226667	0
0.612477	1.04311	0
-0.277001	-1.31173	0
-0.226275	0.370243	0
0.262517	0.727083	0
-0.00985408	-0.331607	0
0.066741	-0.153965	0
0.0904819	0.310357	0
0.129488	0.188801	0
0.0290762	-0.0853857	0
-0.198515	-0.596221	0
0.0846428	-0.299392	0
-0.182525	0.53465	0
0.182014	-0.638833	0
0.121243	-0.150757	0
0.210435	0.835169	0
-0.168562	0.24752	0
0.26075	1.43315	0
0.00856376	-0.264441	0
0.135899	1.15176	0
0.106771	0.0690376	0
0.41422	0.912082	0
0.126618	-0.60742	0
-0.0525234	-1.2337	0
-0.264098	-1.02748	0
-0.313498	0.749084	0
0.0632951	-0.517685	0
0.0771071	-0.469689	0
0.488126	0.459657	0
-0.4389	-0.697682	0
0.0846854	0.971335	0
-0.120649	-0.56133	0
-0.0817549	-0.782075	0
0.128583	-0.340691	0
0.369148	0.66467	0
-0.129574	-0.39674	0
-0.0445309	0.245539	0
-0.707597	-0.661601	0
0.179382	0.996842	0
0.0114144	1.29585	0
0.119142	-0.646513	0
0.105459	0.20828	0
-0.200111	0.772704	0
-0.0210874	0.090305	0
0.17681	-0.290786	0
0.0952931	0.179051	0
-0.666814	-0.189416	0
0.0740838	0.280641	0
0.216114	0.435512	0
0.293263	-0.778228	0
0.382518	-0.250442	0
0.156393	-0.115095	0
-0.0329291	0.462674	0
-0.0186787	0.105961	0
0.238791	0.173808	0
0.120665	0.240824	0
-0.0864907	-0.580567	0
0.16283	-0.587625	0
-0.100486	-0.195212	0
0.46696	0.649412	0
-0.498257	0.867277	0
0.0879838	-0.475177	0
-0.00959766	0.491286	0
-0.0716114	0.0929806	0
0.292932	0.352426	0
0.01271	-0.00523462	0
0.109591	0.068658	0
0.588886	0.740051	0
0.159655	-0.827067	0
0.195198	-0.109624	0
-0.25721	0.0375558	0
0.153978	-0.62768	0
0.121038	-0.462529	0
0.293828	-0.535334	0
0.112018	0.84975	0
0.0406863	-0.15295	0
-0.118312	0.868895	0
0.250741	0.844678	0
0.332119	1.16336	0
-0.0387692	0.0929501	0
0.0287247	-2.10832	0
0.404934	0.253496	0
-0.0833247	-0.542927	0
-0.115338	-0.719506	0
0.0902751	0.565303	0
0.00894853	0.162215	0
-0.401203	-0.502849	0
0.084117	0.0378473	0
0.20338	0.344975	0
0.313132	0.45399	0
-0.0190094	-0.925639	0
-0.320701	0.163054	0
0.118504	-0.797169	0
-0.0446764	-0.177045	0
0.0638549	0.300822	0
0.34356	1.64125	0
-0.0179743	0.187287	0
0.1802	-0.205037	0
0.338595	0.15857	0
0.40693	-0.490168	0
0.420732	-0.230169	0
-0.289157	0.34114	0
-0.182558	0.406734	0
-0.419753	0.170666	0
0.0954459	-0.205371	0
-0.147384	0.640906	0
0.403759	-1.1945	0
0.0769358	0.288842	0
0.38778	0.195924	0
0.352596	0.41788	0
-0.00722409	-0.667975	0
-0.0700758	1.06012	0
0.22854	0.324664	0
-0.260499	-0.530752	0
0.0502458	0.297041	0
0.0328548	0.464035	0
0.0799642	2.0136	0
0.235882	1.12468	0
-0.441317	-0.525112	0
-0.0117921	-0.774834	0
-0.0516137	0.225328	0
-0.135133	0.591006	0
0.40354	2.14902	0
-0.368714	-0.372897	0
-0.132827	-0.336845	0
0.186826	-0.261066	0
0.241297	0.642057	0
0.0524808	0.930978	0
-0.0544901	-0.33652	0
-0.00534517	-0.247303	0
0.150166	-1.19252	0
-0.265384	-1.7263	0
0.346148	0.0568114	0
0.0120745	1.47303	0
-0.108154	-0.031196	0
-0.132726	-0.0873098	0
0.641403	0.866765	0
0.156975	0.458475	0
0.392801	0.882984	0
-0.0823189	0.43515	0
0.152744	1.47359	0
0.160736	0.695658	0
0.0935581	-2.32153	0
-0.0120407	0.37913	0
-0.117935	-0.592275	0
0.522586	-1.02205	0
0.0927466	-0.794063	0
0.0793691	0.289596	0
-0.251953	-0.571876	0
-0.00362491	0.0311062	0
0.214756	0.825644	0
0.314449	1.10165	0
0.170771	-0.503578	0
-0.0517772	0.139808	0
0.52937	-0.134222	0
-0.0487932	0.508602	0
0.164415	0.294714	0
0.094848	0.272735	0
0.264241	0.247351	0
-0.142755	-0.616162	0
-0.135203	0.642001	0
0.174428	0.898106	0
0.168759	0.559892	0
-0.0717744	-0.287594	0
0.316353	0.645879	0
0.216152	1.08065	0
0.0144795	0.438874	0
-0.03909	-0.648924	0
0.0339419	1.15073	0
0.00710594	0.0501337	0
0.123079	0.856215	0
0.0359353	-0.731712	0
0.028705	1.20369	0
-0.183835	-0.223382	0
0.0162898	-0.983493	0
0.0660451	0.42883	0
0.122717	0.586001	0
0.22986	0.230985	0
0.104755	-0.912084	0
-0.12337	-0.52421	0
-0.196446	-1.0827	0
0.00271055	-0.516455	0
0.117896	1.05123	0
0.05284	0.561255	0
-0.178765	-0.965413	0
-0.254672	0.459306	0
0.114639	0.499073	0
-0.0482488	-1.622	0
-0.658316	0.139026	0
0.101602	-1.20711	0
-0.253237	-0.498287	0
0.155132	-0.779686	0
-0.155208	-0.215134	0
-0.0305602	0.619018	0
0.159644	1.26631	0
0.173616	0.516859	0
0.0515349	-0.510337	0
0.0196914	0.791413	0
0.186891	0.568688	0
0.0181274	0.86456	0
0.0133943	-0.144281	0
-0.0915521	0.29195	0
-0.202463	-0.0648	0
0.445947	1.56565	0
0.048675	-0.380668	0
-0.287582	0.91328	0
-0.184895	0.0999326	0
0.0586853	0.907263	0
0.193522	0.275057	0
-0.154558	-0.437764	0
-0.457043	-0.246758	0
-0.63196	-0.0681321	0
0.189197	1.00979	0
0.144006	-0.316341	0
0.216187	-0.161739	0
0.0377108	-0.116487	0
0.349774	-0.395533	0
0.0641753	-0.0307154	0
-0.59079	-0.715772	0
0.173269	-0.284664	0
-0.101655	-0.49299	0
-0.161872	0.320536	0
0.0884364	-1.07049	0
0.119022	0.0611069	0
-0.0802935	0.482701	0
-0.023973	-0.118436	0
-0.0277238	1.48797	0
0.0685311	0.0149751	0
0.574393	0.63538	0
0.161081	0.131306	0
-0.0819365	0.312328	0
0.0871797	0.293567	0
-0.192357	-0.610388	0
0.191926	0.602982	0
0.329297	1.07367	0
-0.576313	-0.315475	0
0.560791	1.17691	0
-0.0890561	0.176692	0
0.233886	0.813564	0
-0.418594	-0.806247	0
-0.185215	-1.15295	0
0.0537257	0.435107	0
0.336508	-0.146714	0
0.135616	-0.86711	0
0.340932	-0.454211	0
0.058635	-0.826297	0
0.597015	-0.0185216	0
-0.367595	0.741272	0
-0.109395	-0.578741	0
0.193026	-0.059576	0
0.581335	0.648173	0
0.277831	1.31512	0
0.23015	1.20754	0
0.555661	0.512141	0
0.34132	0.507139	0
-0.40415	-0.262272	0
0.0123597	0.177456	0
0.109876	-0.776489	0
-0.0432912	0.451505	0
-0.0522179	0.779822	0
0.17252	2.30792	0
0.398192	1.06829	0
-0.375383	-0.536013	0
0.223509	1.18902	0
-0.197014	0.71591	0
-0.00564706	-1.03253	0
0.0173202	0.233719	0
0.231288	0.176748	0
-0.145022	-0.16115	0
-0.132638	-0.496697	0
0.318813	0.664599	0
-0.0994089	-1.05553	0
0.119687	-0.252261	0
-0.21932	-0.165566	0
0.376782	0.742998	0
-0.117931	-0.195996	0
0.189589	0.365859	0
-0.338509	-0.106963	0
0.819633	0.790916	0
-0.0308071	-1.00175	0
0.0677884	0.310318	0
0.117029	-0.675739	0
0.277539	0.234856	0
-0.342373	-1.50714	0
0.194051	0.11451	0
-0.0344052	-0.924222	0
0.127149	-0.377178	0
-0.936411	-1.03501	0
0.261135	-0.0800945	0
0.0536954	-0.982192	0
0.130688	-0.498363	0
0.205236	-0.471848	0
0.27634	-0.0332882	0
0.0265726	0.114396	0
0.0235649	-0.0850209	0
0.150006	-0.820801	0
0.0286942	-0.365063	0
0.201768	-0.0989071	0
0.150572	0.519987	0
-0.0676829	-0.849524	0
0.222121	1.37857	0
-0.0268289	0.494781	0
-0.490497	-0.125078	0
-0.0496303	-0.568332	0
0.158025	0.330343	0
-0.186009	-1.05878	0
-0.0765803	0.575614	0
-0.0301951	0.0479466	0
0.147153	-0.425001	0
-0.134118	-0.470308	0
-0.00735055	0.393229	0
0.357764	0.502636	0
-0.0976011	-0.789134	0
0.104576	-0.607719	0
-0.481491	-0.48196	0
0.282981	-0.366136	0
-0.0503059	-1.57121	0
0.387598	-0.190402	0
0.165732	-0.0755769	0
0.112339	-0.962026	0
0.495234	0.837957	0
-0.1077	0.519649	0
0.106239	0.542001	0
0.340121	-1.25182	0
0.10534	-0.74372	0
0.116788	0.132749	0
0.0354201	0.462477	0
0.034615	-0.285888	0
0.121497	-0.528138	0
0.141467	-0.0928231	0
0.375568	0.218914	0
-0.0336331	0.320227	0
0.0998859	0.636772	0
0.053385	-0.34744	0
-0.0523769	0.56988	0
-0.0283658	1.10696	0
0.353313	0.169916	0
0.103801	0.574607	0
0.0166551	-0.137532	0
0.0935032	-0.331343	0
-0.118917	0.186512	0
0.197509	0.278864	0
0.0463375	-0.25292	0
-0.0679289	0.319861	0
-0.0724959	-0.637999	0
-0.200112	-0.830557	0
0.271261	-0.442112	0
-0.0307066	0.144853	0
0.0281766	0.0810833	0
0.442578	0.0592838	0
-0.105355	-0.51941	0
0.0752577	0.492049	0
0.432866	0.333421	0
-0.218123	-0.525636	0
-0.310016	0.162072	0
-0.050994	-1.30392	0
-0.0108516	0.460427	0
0.464398	0.0542916	0
-0.192136	0.753261	0
0.273099	0.593546	0
0.0699411	-0.948242	0
0.301231	-0.0196444	0
0.0240451	-0.239589	0
-0.225969	0.134478	0
-0.0557068	-0.574589	0
-0.102692	-0.417554	0
0.349473	-0.0663913	0
0.789903	-0.0968064	0
-0.027812	-0.129744	0
-0.131012	0.723537	0
-0.133654	-0.559709	0
0.452916	0.234191	0
0.395452	0.474411	0
0.087948	-0.363785	0
-0.0953565	-0.450541	0
0.111665	-0.616051	0
0.566774	0.682402	0
0.0389278	-0.383478	0
0.132875	-1.17957	0
-0.342733	0.214778	0
0.223067	0.138202	0
0.0837132	-0.582751	0
-0.0219905	-0.729701	0
0.416754	0.889048	0
0.13778	0.282233	0
0.0596506	0.350015	0
0.38991	1.51792	0
0.160521	-0.0435538	0
0.620505	0.623499	0
0.229599	0.270905	0
-0.011027	-1.33164	0
0.0972098	-1.01117	0
-0.0923549	0.614548	0
0.015847	-0.358933	0
0.00856555	0.333854	0
0.204286	0.528253	0
-0.0809595	-0.523631	0
-0.34379	-0.882412	0
0.047614	-0.0474218	0
-0.174967	-0.587942	0
-0.212753	-1.37833	0
-0.439621	-0.285831	0
-0.0978348	0.642305	0
0.0337978	1.75235	0
0.0458418	0.599397	0
0.161216	1.05561	0
-0.783301	-1.00136	0
0.467169	1.23222	0
0.0432904	0.717646	0
-0.0992192	-0.539897	0
0.555479	-0.0231722	0
-0.145548	-0.0367134	0
0.0122972	-0.723014	0
0.203408	-0.00873428	0
0.0336933	-0.469872	0
-0.0240127	0.478311	0
0.0771863	-0.232259	0
0.392456	0.723677	0
-0.145007	0.238008	0
-0.0661303	0.261057	0
0.166458	0.897851	0
0.186992	0.652152	0
0.235926	0.463988	0
-0.345447	-0.502815	0
0.544813	0.35205	0
-0.293005	-1.40035	0
0.0759827	-0.0628921	0
-0.445894	0.392357	0
0.0578379	0.420367	0
0.0592824	-0.0695537	0
-0.0622498	-0.875028	0
0.187926	-0.191933	0
0.00244669	-1.9291	0
0.175664	0.803826	0
0.518016	1.18046	0
-0.091184	0.283765	0
0.209174	0.556737	0
-0.123989	-0.437171	0
0.149271	-0.229238	0
0.00103636	0.358372	0
-0.0671216	-1.4077	0
0.0795389	-0.418374	0
0.285244	0.211589	0
0.0338943	0.413773	0
-0.165484	-0.785816	0
0.11276	-0.0287679	0
-0.326833	-0.056526	0
-0.0749457	-0.428233	0
-0.157529	-0.208196	0
0.183733	0.37214	0
0.321648	0.0464448	0
-0.324007	-1.09384	0
0.103808	0.328634	0
-0.261448	-0.364427	0
0.240129	1.00612	0
0.0935055	0.573574	0
0.312668	-0.730035	0
-0.0600305	-0.66997	0
-0.0738152	-0.766946	0
-0.0833639	-0.943636	0
0.10606	1.07675	0
0.531845	1.48054	0
0.279545	-0.428575	0
-0.0504227	-0.450662	0
0.286961	-1.30736	0
0.218535	-0.200487	0
-0.347725	-0.455608	0
0.204371	-0.390572	0
0.0411288	-0.323922	0
-0.135766	0.42656	0
0.195175	0.201544	0
0.257424	-0.101102	0
0.199784	0.148864	0
0.0283832	1.35408	0
0.0800758	-0.0817053	0
0.552946	1.1168	0
0.0275615	-0.552628	0
0.231595	-0.187408	0
0.201524	0.100304	0
-0.336835	-0.367398	0
-0.0639965	1.0528	0
0.434144	0.369844	0
0.176091	0.617969	0
0.119418	1.29206	0
0.062283	1.16328	0
-0.00924285	-0.382345	0
0.266328	-0.217244	0
0.164244	0.207758	0
-0.0642835	-0.0959958	0
0.228089	0.437164	0
-0.351321	0.153026	0
0.195451	-0.184623	0
0.281599	0.671386	0
0.149537	-0.432147	0
-0.468294	0.125193	0
-0.0244317	-0.410263	0
0.120136	0.43588	0
0.13916	0.163142	0
0.182096	0.223896	0
0.214211	1.44572	0
0.254801	-0.200044	0
-0.0405233	0.710779	0
0.0406428	-0.481824	0
0.189052	-0.172459	0
-0.233504	-0.972252	0
-0.0059709	0.896463	0
0.133617	1.03172	0
0.118063	0.236618	0
-0.0337118	0.0822138	0
0.0082511	-0.198754	0
0.208694	1.73078	0
0.374153	1.22566	0
0.175823	0.53368	0
0.354075	0.864509	0
-0.0516753	-0.80027	0
0.588043	0.253771	0
0.113001	0.84272	0
0.219	0.419543	0
0.209576	0.647404	0
0.200347	1.3712	0
0.0431405	-0.138604	0
-0.0875314	0.36256	0
0.10473	0.989529	0
-0.0314477	0.206138	0
-0.10618	-0.746054	0
0.145515	1.3243	0
-0.323662	-0.641436	0
0.215661	-0.0445531	0
0.139084	-0.354928	0
-0.296519	-0.795417	0
0.353115	1.21128	0
0.303661	0.848094	0
0.186443	-0.310076	0
-0.532699	-0.26874	0
0.0954881	0.349528	0
0.108192	0.126676	0
-0.291373	-0.764956	0
0.167379	0.0861344	0
-0.314683	-0.36248	0
0.505103	0.222276	0
0.106777	0.0137094	0
-0.186603	1.12841	0
-0.0290581	0.441817	0
0.200769	0.995664	0
0.102978	0.0949738	0
0.160566	0.164307	0
-0.104015	-0.190505	0
0.551826	1.26983	0
-0.496418	0.480995	0
0.22127	1.02293	0
0.0727235	1.00791	0
0.510958	0.628425	0
-0.505095	-0.765578	0
-0.0955328	0.464173	0
0.0420616	1.59241	0
0.364164	0.956848	0
-0.00943742	-0.511977	0
-0.0266869	0.878869	0
0.267215	-0.467232	0
-0.293511	-0.785681	0
0.437521	1.5102	0
-0.0663153	-0.790384	0
0.593515	-0.0677146	0
0.0907371	-0.0723817	0
-0.0935993	0.403124	0
-0.0717845	-0.729135	0
0.024509	0.52132	0
0.0129307	0.317511	0
0.0586542	0.208284	0
0.542039	0.340685	0
-0.0301524	0.0715122	0
0.315152	-0.826423	0
0.0385603	0.234468	0
0.0404323	-0.135384	0
0.145064	1.17002	0
0.47456	-0.140114	0
0.336907	0.847148	0
0.0714148	1.6943	0
0.625192	0.549003	0
0.0050194	0.31415	0
-0.136792	0.99487	0
-0.233424	0.657269	0
-0.209884	-0.585964	0
0.194269	-0.355111	0
0.376147	0.140983	0
0.488063	0.722235	0
0.109358	0.289741	0
0.455064	-0.227818	0
0.28755	1.28398	0
-0.027467	-1.03329	0
0.042406	-0.475465	0
0.0451898	-0.77155	0
-0.0585485	-1.04637	0
0.194298	0.972624	0
0.144755	-0.0969303	0
0.636579	1.30299	0
0.424975	0.0395802	0
0.593698	0.180783	0
0.387256	-0.206347	0
0.685905	-0.562352	0
0.027997	0.297845	0
-0.00170434	-1.25255	0
-0.126785	-0.27058	0
0.236362	-0.404635	0
-0.0741984	0.431876	0
-0.107945	-0.664229	0
0.0883163	-0.0893537	0
0.295797	1.01769	0
-0.541589	-0.41354	0
0.139328	0.773443	0
0.0410922	0.94503	0
-0.236377	-0.500447	0
0.139418	0.957883	0
0.459598	0.631128	0
0.164265	-0.592595	0
0.0229578	0.837704	0
-0.24895	-0.161159	0
0.361744	0.525053	0
-0.180496	0.374092	0
0.21812	-0.567099	0
0.14735	-0.308616	0
0.204047	0.856736	0
0.329064	0.98256	0
0.264263	0.473699	0
0.504122	-0.475475	0
0.34793	0.439396	0
0.303114	0.16356	0
0.168829	-0.695681	0
0.248548	0.18799	0
0.0735494	-0.0584351	0
-0.664436	-1.60006	0
-0.203375	0.00726487	0
-0.269511	-0.333869	0
0.00485448	0.186731	0
-0.0867303	0.806365	0
-0.16444	0.131621	0
0.285124	-0.480091	0
0.172524	-0.0621505	0
-0.0513981	0.458813	0
0.373158	0.951608	0
-0.0522283	0.928289	0
0.14314	0.64767	0
0.407972	0.12999	0
0.199689	0.3989	0
0.0729893	0.45692	0
0.128068	-0.442262	0
-0.242227	0.166504	0
0.377507	0.659031	0
0.412543	0.367898	0
0.243539	-0.167887	0
-0.12586	0.113379	0
-0.0126593	-0.933327	0
-0.169775	0.453696	0
0.0821922	-1.05365	0
-0.0698707	-0.387685	0
0.247963	0.31619	0
0.174592	0.116506	0
-0.299912	0.416131	0
0.193985	1.27551	0
0.377079	0.596053	0
0.3579	-0.274798	0
-0.00417519	-0.402615	0
0.176271	0.313249	0
0.0184154	0.131672	0
0.199218	-0.017508	0
0.55859	0.773109	0
0.0686787	0.230592	0
0.294246	0.278187	0
0.300834	-0.472848	0
-0.0712007	-0.28409	0
0.0469036	0.252709	0
0.062187	0.477077	0
-0.00513765	-0.23549	0
0.409581	0.326512	0
-0.204917	-0.242888	0
0.128793	-0.72454	0
0.164745	0.595424	0
-0.181589	-0.0769902	0
0.00817718	0.251636	0
-0.28057	0.0630255	0
0.17255	0.623832	0
0.139679	0.365529	0
0.288961	0.528222	0
-0.365783	-1.06055	0
-0.194622	-0.317795	0
0.0756726	0.868221	0
-0.104541	0.322794	0
-0.431177	0.231316	0
0.00913848	-0.070085	0
0.00762717	-0.184529	0
0.0318205	0.150823	0
0.00819045	-0.766704	0
-0.0368581	-0.34431	0
0.10179	-0.19137	0
0.115012	-0.0812004	0
-0.0599088	-1.17305	0
-0.515717	-1.75028	0
0.0539948	0.599841	0
0.214866	0.104367	0
0.503158	-0.135079	0
-0.67526	-0.0305755	0
0.342902	0.516082	0
0.217996	0.137151	0
-0.463568	-1.25402	0
-0.539918	0.293713	0
0.103344	0.771012	0
0.53818	-0.567697	0
0.104925	1.80979	0
-0.142243	-0.190519	0
-0.00348742	-0.193805	0
0.338544	0.876647	0
0.0547885	0.0784252	0
0.163043	0.786263	0
-0.0495812	1.07328	0
0.115591	-0.867244	0
-0.152631	-1.06926	0
-0.190075	-0.320948	0
0.328638	-0.218064	0
-0.0771195	0.9202	0
-0.120131	-0.62257	0
0.563177	0.70121	0
-0.0944277	0.230265	0
0.0677558	0.483557	0
0.0169111	0.602121	0
0.364026	0.467054	0
0.0631383	0.424519	0
0.224414	-0.73749	0
0.0891194	0.548895	0
0.622153	0.274713	0
0.195255	-0.534073	0
0.0610295	0.0982767	0
0.132587	1.46553	0
-0.138275	-0.470108	0
-0.361176	-1.01778	0
0.04104	-0.049261	0
0.101805	0.20412	0
0.176853	-0.245469	0
0.0553862	0.311913	0
-0.0552005	0.00521306	0
0.233169	0.955665	0
-0.0212558	0.342546	0
0.139424	0.0852848	0
0.284406	0.447308	0
-0.242884	-0.158458	0
0.0302901	1.29534	0
0.176577	-0.00847541	0
-0.0593793	0.160912	0
0.573552	1.06553	0
0.048527	-0.593746	0
-0.315054	-0.369688	0
0.125411	-0.441134	0
-0.222401	-0.758182	0
0.107747	-0.241731	0
0.222155	0.517662	0
0.150584	-0.429532	0
0.0821583	0.780735	0
0.346297	-0.0819117	0
-0.264055	0.282341	0
0.276614	0.213647	0
-0.0759417	0.703985	0
0.102088	0.34083	0
0.066783	0.573437	0
0.281104	0.23114	0
0.433226	0.417057	0
0.269938	-0.231641	0
-0.0181117	-0.810504	0
0.111847	-0.669167	0
0.35026	-0.177204	0
0.235915	-0.493913	0
0.391589	-0.0187562	0
-0.0236965	0.707249	0
0.124395	-0.80385	0
0.00651947	-0.258873	0
0.360337	0.527259	0
0.00622968	-0.494662	0
0.136916	1.17812	0
0.291766	0.0507792	0
0.356147	0.991713	0
0.465999	-0.12407	0
-0.155682	0.381261	0
0.269153	-0.16461	0
0.191835	-0.163079	0
0.449524	1.4603	0
0.0763571	0.406052	0
0.329997	0.936171	0
0.0530545	0.504283	0
0.0623979	0.906886	0
0.177588	0.365339	0
-0.0892715	-0.447282	0
-0.0780387	-0.07613	0
-0.0168896	0.346502	0
-0.10699	0.568958	0
-0.137769	0.465709	0
-0.168195	0.117628	0
-0.0229126	-0.162076	0
-0.657365	-0.681723	0
0.0498851	0.646825	0
-0.794022	-0.379721	0
0.0742663	-1.60867	0
0.0349697	0.0438712	0
0.370386	0.339447	0
-0.0171856	0.273845	0
-0.361863	-0.487458	0
-0.0524015	-0.38734	0
0.0971717	0.997319	0
0.128677	0.16523	0
-0.372326	-0.108695	0
0.262561	0.21442	0
0.0717296	0.946231	0
0.0896481	0.760391	0
0.393408	0.494315	0
0.493739	-0.104837	0
-0.294196	-1.11582	0
-0.0821887	-0.372025	0
-0.0506927	-0.454338	0
-0.0587816	-1.33669	0
-0.168794	-0.11658	0
0.549143	0.556365	0
-0.100312	0.797198	0
-0.0342944	0.641162	0
0.165138	-0.808901	0
0.259295	-0.28521	0
-0.263023	0.0977531	0
0.305951	0.447433	0
0.00859775	-0.0277085	0
0.195659	-0.422732	0
0.157113	-0.0811435	0
-0.409662	-1.49896	0
0.143543	-1.17656	0
-0.0609167	0.271701	0
-0.232552	0.487426	0
0.166403	0.0290483	0
-0.351213	-0.595922	0
0.0886512	1.49168	0
0.154669	-1.7121	0
0.262223	0.707656	0
0.0491738	-1.68836	0
0.416444	1.00376	0
-0.195424	-0.91645	0
-0.179787	1.17736	0
0.146691	1.62582	0
-0.433595	-1.57954	0
0.242811	1.11712	0
-0.617354	-1.2953	0
0.34397	0.310249	0
-0.0432839	0.791663	0
-0.121578	-0.0045344	0
0.353392	0.522207	0
0.0147211	0.688926	0
0.364964	0.126089	0
0.478511	0.198475	0
0.25679	-0.226529	0
-0.0399419	0.262698	0
0.499241	0.762913	0
0.444249	1.33632	0
0.41033	0.857281	0
0.321784	0.434472	0
0.0651154	-0.396671	0
0.265339	0.779371	0
[truncated: 19,079 more rows]

## Sheet: Figure 2c
Pearson correlations between the g-factor and mental health indices. Mental health features are grouped into categories.
Feature	Correlation	Domain
Ever sought or received professional help for mental distress	0.0619101	Mental distress
Any distress	0.0574647	Mental distress
Ever suffered mental distress preventing usual activities	0.0564403	Mental distress
Seen doctor (GP) for nerves, anxiety, tension or depression	0.0504948	Mental distress
Seen a psychiatrist for nerves, anxiety, tension or depression	-0.00431804	Mental distress
Depression single episode	0.0207738	Depression
RDS-4	0.0153562	Depression
PHQ-9	0.0169737	Depression
Subthreshold depression	-0.00429592	Depression
Depression triggered by loss	0.00114027	Depression
Current severe depression	-0.00768748	Depression
Current depression	-0.0133308	Depression
Ever unenthusiastic/disinterested for a whole week	0.0637399	Depression
Depression ever	0.0355631	Depression
Recurrent depression	0.0326428	Depression
Ever had prolonged feelings of sadness or depression	0.0296719	Depression
Recent poor appetite or overeating	0.0347084	Depression
PDS	0.0497247	Depression
Ever had prolonged loss of interest in normal activities	0.0387575	Depression
Recent changes in speed/amount of moving or speaking	-0.0394112	Depression
Recent feelings of depression	0.0108112	Depression
Recent feelings of inadequacy	0.0223551	Depression
Recent feelings of tiredness or low energy	0.019197	Depression
Recent lack of interest or pleasure in doing things	0.00217441	Depression
Recent thoughts of suicide or self-harm	0.00401935	Depression
Recent trouble concentrating on things	-0.0106269	Depression
Trouble falling or staying asleep, or sleeping too much	0.0222937	Depression
Frequency of depressed mood in last 2 weeks	0.0135249	Depression
Frequency of unenthusiasm / disinterest in last 2 weeks	0.00619088	Depression
Frequency of tenseness / restlessness in last 2 weeks	0.00893861	Depression
Frequency of tiredness / lethargy in last 2 weeks	0.0156604	Depression
Ever depressed for a whole week	0.0339512	Depression
Neurological problems, nervous system injury, epilepsy	-0.0210489	Diagnoses
Mental and behavioural disorders	-0.0245192	Diagnoses
Diseases of the nervous system	-0.0454041	Diagnoses
Anxiety/panic attacks	0.0121669	Diagnoses
Stress, insomnia, migraine, nervous/mental problems	0.0255452	Diagnoses
Depression	0.0248658	Diagnoses
Ever had period of extreme irritability	0.0425033	Mania
Ever had period of mania / excitability	0.00100798	Mania
Ever manic/hyper for 2 days	-0.0319978	Mania
Ever highly irritable/argumentative for 2 days	0.00905718	Mania
Bipolar I	-0.0123358	Mania
Bipolar II	-0.00898142	Mania
Ever felt worried, tense, or anxious for most of a month or longer	0.0154955	Anxiety
Ever worried more than most people would in similar situation	0.0165143	Anxiety
Recent easy annoyance or irritability	-0.00449627	Anxiety
Recent feelings of foreboding	-0.0282902	Anxiety
Recent feelings or nervousness or anxiety	-0.00862698	Anxiety
Recent inability to stop or control worrying	-0.0396571	Anxiety
Recent restlessness	-0.0459035	Anxiety
Recent trouble relaxing	-0.00325449	Anxiety
Recent worrying too much about different things	-0.0178574	Anxiety
GAD ever	-0.00100614	Anxiety
GAD-7	-0.0252376	Anxiety
Current GAD	-0.0180027	Anxiety
Current GAD moderate	-0.0139958	Anxiety
Current GAD mild	-0.0105787	Anxiety
Current GAD severe	-0.0112424	Anxiety
N-12	0.0163844	Neuroticism
Mood swings	-0.0141503	Neuroticism
Miserableness	0.0464407	Neuroticism
Irritability	0.0526255	Neuroticism
Sensitivity / hurt feelings	0.00269893	Neuroticism
Fed-up feelings	0.0163311	Neuroticism
Nervous feelings	-0.0188717	Neuroticism
Worrier / anxious feelings	-0.0153554	Neuroticism
Tense / 'highly strung'	-0.0205016	Neuroticism
Worry too long after embarrassment	0.0650412	Neuroticism
Suffer from 'nerves'	-0.0099749	Neuroticism
Loneliness, isolation	-0.0183246	Neuroticism
Guilty feelings	0.00221872	Neuroticism
Risk taking	-0.0282671	Neuroticism
Ever addicted to any substance or behaviour	0.022715	Addictions
Substance addiction	0.0100102	Addictions
Current addiction	0.0138368	Addictions
Physical alcohol dependence ever	-0.00991703	Addictions
Cannabis ever	0.156881	Alcohol and cannabis use
Lifertime frequency of taking cannabis	0.143727	Alcohol and cannabis use
(log)AUDIT	0.127479	Alcohol and cannabis use
(log)AUDIT-C	0.131094	Alcohol and cannabis use
(log)AUDIT-P	0.0618224	Alcohol and cannabis use
Alcohol dependence (AUDIT≥15)	0.0365154	Alcohol and cannabis use
Hazardous alcohol use (AUDIT≥8)	0.079876	Alcohol and cannabis use
Frequency of consuming six or more units of alcohol	0.128665	Alcohol and cannabis use
Frequency of drinking alcohol	0.0978078	Alcohol and cannabis use
Amount of alcohol drunk on a typical drinking day	0.0776417	Alcohol and cannabis use
Cannabis daily	0.03214	Alcohol and cannabis use
Ever believed in an un-real conspiracy against self	-0.00799401	Unusual/psychotic experiences
Ever believed in un-real communications or signs	-0.0132005	Unusual/psychotic experiences
Ever heard an un-real voice	0.0122598	Unusual/psychotic experiences
Ever seen an un-real vision	-0.00130026	Unusual/psychotic experiences
Recent unusual experience	-0.00764192	Unusual/psychotic experiences
Unusual experience	0.00333543	Unusual/psychotic experiences
Catastrophic trauma	0.0142568	Traumatic events
Childhood adverse events	-0.0554528	Traumatic events
Adult adverse events	-0.062485	Traumatic events
Felt loved as a child	0.0546523	Traumatic events
Physically abused by family as a child	-0.0274095	Traumatic events
Sexually molested as a child	-0.00774262	Traumatic events
Someone to take to doctor when needed as a child	0.173176	Traumatic events
Been in a confiding relationship as an adult	0.12104	Traumatic events
Physical violence by partner or ex-partner as an adult	-0.00687946	Traumatic events
Belittlement by partner or ex-partner as an adult	0.0141319	Traumatic events
Sexual interference by partner or ex-partner without consent as an adult	0.0124996	Traumatic events
Able to pay rent/mortgage as an adult	0.133005	Traumatic events
Victim of sexual assault	0.0316195	Traumatic events
Victim of physically violent crime	0.0442031	Traumatic events
Been in serious accident believed to be life-threatening	0.00162491	Traumatic events
Witnessed sudden violent death	-0.00633619	Traumatic events
Diagnosed with life-threatening illness	-0.0635995	Traumatic events
Been involved in combat or exposed to war-zone	-0.0470261	Traumatic events
Repeated disturbing thoughts of stressful experience in past month	-0.0459279	Traumatic events
Felt very upset when reminded of stressful experience in past month	-0.0486688	Traumatic events
PTSD	-0.0217564	Traumatic events
PCL-6	-0.0318046	Traumatic events
Avoided activities or situations because of previous stressful experience in past month	-0.0226855	Traumatic events
Felt hated by family member as a child	-0.000650372	Traumatic events
Lifetime frequency of contemplating self-harm	0.0777231	Self-harm behaviours
Self-harm: Ever thought life not worth living	0.0652003	Self-harm behaviours
Ever self-harmed	0.0515091	Self-harm behaviours
Ever self-harmed (non-suicidal)	0.0495725	Self-harm behaviours
Ever attempted suicide	0.0247867	Self-harm behaviours
Frequency of 'life not worth living' thoughts	0.0683622	Self-harm behaviours
Belief that own life is meaningful	-0.0693532	Happiness and subjective well-being
Health satisfaction	0.0343587	Happiness and subjective well-being
General happiness	-0.0498855	Happiness and subjective well-being
General happiness with own health	0.0165544	Happiness and subjective well-being
Happiness	-0.0427266	Happiness and subjective well-being
Family relationship satisfaction	-0.0201411	Happiness and subjective well-being
Friendships satisfaction	-0.0784562	Happiness and subjective well-being
Financial situation satisfaction	0.00930744	Happiness and subjective well-being
Wellbeing	-0.0417339	Happiness and subjective well-being
Features	Significant correlations	p-values
Someone to take to doctor when needed as a child	0.173176	1.19945e-113
Cannabis ever	0.156881	2.31277e-93
Lifertime frequency of taking cannabis	0.143727	1.63363e-78
Able to pay rent/mortgage as an adult	0.133005	2.09605e-67
(log)AUDIT-C	0.131094	1.6127e-65
Frequency of consuming six or more units of alcohol	0.128665	3.67522e-63
(log)AUDIT	0.127479	5.0133e-62
Been in a confiding relationship as an adult	0.12104	4.70512e-56
Frequency of drinking alcohol	0.0978078	4.03247e-37
Hazardous alcohol use (AUDIT≥8)	0.079876	2.81997e-25
Lifetime frequency of contemplating self-harm	0.0777231	5.14948e-24
Amount of alcohol drunk on a typical drinking day	0.0776417	5.7386e-24
Frequency of 'life not worth living' thoughts	0.0683622	6.30259e-19
Self-harm: Ever thought life not worth living	0.0652003	2.35795e-17
Worry too long after embarrassment	0.0650412	2.81687e-17
Ever unenthusiastic/disinterested for a whole week	0.0637399	1.1867e-16
Ever sought or received professional help for mental distress	0.0619101	8.54435e-16
(log)AUDIT-P	0.0618224	9.3789e-16
Any distress	0.0574647	8.17931e-14
Ever suffered mental distress preventing usual activities	0.0564403	2.2327e-13
Felt loved as a child	0.0546523	1.23517e-12
Irritability	0.0526255	8.0504e-12
Ever self-harmed	0.0515091	2.19539e-11
Seen doctor (GP) for nerves, anxiety, tension or depression	0.0504948	5.36488e-11
PDS	0.0497247	1.04518e-10
Ever self-harmed (non-suicidal)	0.0495725	1.19101e-10
Miserableness	0.0464407	1.60817e-09
Victim of physically violent crime	0.0442031	9.34825e-09
Ever had period of extreme irritability	0.0425033	3.36813e-08
Ever had prolonged loss of interest in normal activities	0.0387575	4.79893e-07
Alcohol dependence (AUDIT≥15)	0.0365154	2.1083e-06
Depression ever	0.0355631	3.85618e-06
Recent poor appetite or overeating	0.0347084	6.54693e-06
Health satisfaction	0.0343587	8.10214e-06
Ever depressed for a whole week	0.0339512	1.03608e-05
Recurrent depression	0.0326428	2.24036e-05
Cannabis daily	0.03214	2.99099e-05
Victim of sexual assault	0.0316195	4.01684e-05
Ever had prolonged feelings of sadness or depression	0.0296719	0.000116461
Stress, insomnia, migraine, nervous/mental problems	0.0255452	0.000908779
Depression	0.0248658	0.00124191
Ever attempted suicide	0.0247867	0.00128724
Ever addicted to any substance or behaviour	0.022715	0.00318075
Recent feelings of inadequacy	0.0223551	0.00369658
Trouble falling or staying asleep, or sleeping too much	0.0222937	0.00379185
Depression single episode	0.0207738	0.00698479
Recent feelings of tiredness or low energy	0.019197	0.0126749
PHQ-9	0.0169737	0.0275221
General happiness with own health	0.0165544	0.0315889
Ever worried more than most people would in similar situation	0.0165143	0.0320039
N-12	0.0163844	0.0333792
Fed-up feelings	0.0163311	0.0339573
Frequency of tiredness / lethargy in last 2 weeks	0.0156604	0.0420042
Ever felt worried, tense, or anxious for most of a month or longer	0.0154955	0.0442136
RDS-4	0.0153562	0.0461546
Worrier / anxious feelings	-0.0153554	0.0461664
Recent worrying too much about different things	-0.0178574	0.0204064
Current GAD	-0.0180027	0.0194045
Loneliness, isolation	-0.0183246	0.0173378
Nervous feelings	-0.0188717	0.0142651
Family relationship satisfaction	-0.0201411	0.00891261
Tense / 'highly strung'	-0.0205016	0.00776286
Neurological problems, nervous system injury, epilepsy	-0.0210489	0.00627031
PTSD	-0.0217564	0.00472529
Avoided activities or situations because of previous stressful experience in past month	-0.0226855	0.00322052
Mental and behavioural disorders	-0.0245192	0.00145227
GAD-7	-0.0252376	0.00104777
Physically abused by family as a child	-0.0274095	0.000371517
Risk taking	-0.0282671	0.000241655
Recent feelings of foreboding	-0.0282902	0.000238835
PCL-6	-0.0318046	3.61869e-05
Ever manic/hyper for 2 days	-0.0319978	3.24341e-05
Recent changes in speed/amount of moving or speaking	-0.0394112	3.06918e-07
Recent inability to stop or control worrying	-0.0396571	2.5895e-07
Wellbeing	-0.0417339	5.92312e-08
Happiness	-0.0427266	2.85389e-08
Diseases of the nervous system	-0.0454041	3.67223e-09
Recent restlessness	-0.0459035	2.47253e-09
Repeated disturbing thoughts of stressful experience in past month	-0.0459279	2.42491e-09
Been involved in combat or exposed to war-zone	-0.0470261	1.0009e-09
Felt very upset when reminded of stressful experience in past month	-0.0486688	2.56671e-10
General happiness	-0.0498855	9.10062e-11
Childhood adverse events	-0.0554528	5.78087e-13
Adult adverse events	-0.062485	4.62324e-16
Diagnosed with life-threatening illness	-0.0635995	1.38362e-16
Belief that own life is meaningful	-0.0693532	1.95634e-19
Friendships satisfaction	-0.0784562	1.93227e-24

## Sheet: Figure 2d
Loadings of mental health indices in the PLSR model showing the relationships between the features (mental health) and the target variable (g-factor). The loadings are averaged across all PLSR components and weighted by R2 in the training set. Mental health features are grouped into categories.
Feature	Loading	Domain
Ever sought or received professional help for mental distress	0.0769191	Mental distress
Any distress	0.0905185	Mental distress
Ever suffered mental distress preventing usual activities	0.0743686	Mental distress
Seen doctor (GP) for nerves, anxiety, tension or depression	0.0695918	Mental distress
Seen a psychiatrist for nerves, anxiety, tension or depression	0.0310129	Mental distress
Depression single episode	0.0215834	Depression
RDS-4	-0.0204031	Depression
PHQ-9	-0.0342465	Depression
Subthreshold depression	-0.0546801	Depression
Depression triggered by loss	0.00617025	Depression
Current severe depression	-0.0671707	Depression
Current depression	-0.0613133	Depression
Ever unenthusiastic/disinterested for a whole week	0.0657344	Depression
Depression ever	0.0687199	Depression
Recurrent depression	0.0321922	Depression
Ever had prolonged feelings of sadness or depression	0.053858	Depression
Recent poor appetite or overeating	-0.0405685	Depression
PDS	0.0757516	Depression
Ever had prolonged loss of interest in normal activities	0.0647583	Depression
Recent changes in speed/amount of moving or speaking	-0.0738542	Depression
Recent feelings of depression	-0.0422338	Depression
Recent feelings of inadequacy	-0.016959	Depression
Recent feelings of tiredness or low energy	-0.0386564	Depression
Recent lack of interest or pleasure in doing things	-0.0389064	Depression
Recent thoughts of suicide or self-harm	-0.0268157	Depression
Recent trouble concentrating on things	-0.0507754	Depression
Trouble falling or staying asleep, or sleeping too much	-0.038658	Depression
Frequency of depressed mood in last 2 weeks	-0.017188	Depression
Frequency of unenthusiasm / disinterest in last 2 weeks	-0.0185775	Depression
Frequency of tenseness / restlessness in last 2 weeks	-0.0349213	Depression
Frequency of tiredness / lethargy in last 2 weeks	-0.0369502	Depression
Ever depressed for a whole week	0.040284	Depression
Neurological problems, nervous system injury, epilepsy	-0.0601102	Diagnoses
Mental and behavioural disorders	-0.0422941	Diagnoses
Diseases of the nervous system	-0.0686674	Diagnoses
Anxiety/panic attacks	-0.0250144	Diagnoses
Stress, insomnia, migraine, nervous/mental problems	-0.0558618	Diagnoses
Depression	0.0222611	Diagnoses
Ever had period of extreme irritability	0.0253155	Mania
Ever had period of mania / excitability	-0.00211021	Mania
Ever manic/hyper for 2 days	-0.0246728	Mania
Ever highly irritable/argumentative for 2 days	-0.00233018	Mania
Bipolar I	-0.027953	Mania
Bipolar II	-0.0153571	Mania
Ever felt worried, tense, or anxious for most of a month or longer	0.0177648	Anxiety
Ever worried more than most people would in similar situation	-0.00368483	Anxiety
Recent easy annoyance or irritability	-0.0415201	Anxiety
Recent feelings of foreboding	-0.0751984	Anxiety
Recent feelings or nervousness or anxiety	-0.0783116	Anxiety
Recent inability to stop or control worrying	-0.0912803	Anxiety
Recent restlessness	-0.094417	Anxiety
Recent trouble relaxing	-0.0753935	Anxiety
Recent worrying too much about different things	-0.0841659	Anxiety
GAD ever	-0.0120556	Anxiety
GAD-7	-0.0837309	Anxiety
Current GAD	-0.0819818	Anxiety
Current GAD moderate	-0.0694449	Anxiety
Current GAD mild	-0.0317319	Anxiety
Current GAD severe	-0.0773316	Anxiety
N-12	-0.00471856	Neuroticism
Mood swings	-0.00874909	Neuroticism
Miserableness	0.0191731	Neuroticism
Irritability	0.0152778	Neuroticism
Sensitivity / hurt feelings	-0.0375501	Neuroticism
Fed-up feelings	-0.0115687	Neuroticism
Nervous feelings	-0.0643003	Neuroticism
Worrier / anxious feelings	-0.0570763	Neuroticism
Tense / 'highly strung'	-0.0436821	Neuroticism
Worry too long after embarrassment	-0.0161284	Neuroticism
Suffer from 'nerves'	-0.0501959	Neuroticism
Loneliness, isolation	-0.0278997	Neuroticism
Guilty feelings	-0.0231744	Neuroticism
Risk taking	-0.000508383	Neuroticism
Ever addicted to any substance or behaviour	0.0812493	Addictions
Substance addiction	0.0764138	Addictions
Current addiction	0.0573241	Addictions
Physical alcohol dependence ever	-0.00367774	Addictions
Cannabis ever	0.177644	Alcohol and cannabis use
Lifertime frequency of taking cannabis	0.181875	Alcohol and cannabis use
(log)AUDIT	0.328692	Alcohol and cannabis use
(log)AUDIT-C	0.29394	Alcohol and cannabis use
(log)AUDIT-P	0.246655	Alcohol and cannabis use
Alcohol dependence (AUDIT≥15)	0.1736	Alcohol and cannabis use
Hazardous alcohol use (AUDIT≥8)	0.27334	Alcohol and cannabis use
Frequency of consuming six or more units of alcohol	0.285067	Alcohol and cannabis use
Frequency of drinking alcohol	0.217748	Alcohol and cannabis use
Amount of alcohol drunk on a typical drinking day	0.249984	Alcohol and cannabis use
Cannabis daily	0.0527109	Alcohol and cannabis use
Ever believed in an un-real conspiracy against self	-0.0216604	Unusual/psychotic experiences
Ever believed in un-real communications or signs	-0.0398871	Unusual/psychotic experiences
Ever heard an un-real voice	-0.0150581	Unusual/psychotic experiences
Ever seen an un-real vision	-0.0152925	Unusual/psychotic experiences
Recent unusual experience	-0.046489	Unusual/psychotic experiences
Unusual experience	-0.00657954	Unusual/psychotic experiences
Catastrophic trauma	0.0356771	Traumatic events
Childhood adverse events	-0.0343571	Traumatic events
Adult adverse events	-0.0576757	Traumatic events
Felt loved as a child	-0.0576531	Traumatic events
Physically abused by family as a child	-0.0151851	Traumatic events
Sexually molested as a child	-0.0308929	Traumatic events
Someone to take to doctor when needed as a child	0.0258421	Traumatic events
Been in a confiding relationship as an adult	0.00868874	Traumatic events
Physical violence by partner or ex-partner as an adult	-0.0240713	Traumatic events
Belittlement by partner or ex-partner as an adult	-0.00903627	Traumatic events
Sexual interference by partner or ex-partner without consent as an adult	-0.0353973	Traumatic events
Able to pay rent/mortgage as an adult	0.00665441	Traumatic events
Victim of sexual assault	0.0117441	Traumatic events
Victim of physically violent crime	0.0423254	Traumatic events
Been in serious accident believed to be life-threatening	-0.00442756	Traumatic events
Witnessed sudden violent death	-0.0125316	Traumatic events
Diagnosed with life-threatening illness	-0.0662587	Traumatic events
Been involved in combat or exposed to war-zone	-0.0447738	Traumatic events
Repeated disturbing thoughts of stressful experience in past month	-0.0598751	Traumatic events
Felt very upset when reminded of stressful experience in past month	-0.0644041	Traumatic events
PTSD	-0.0670932	Traumatic events
PCL-6	-0.0553977	Traumatic events
Avoided activities or situations because of previous stressful experience in past month	-0.0664738	Traumatic events
Felt hated by family member as a child	-0.021335	Traumatic events
Lifetime frequency of contemplating self-harm	0.078783	Self-harm behaviours
Self-harm: Ever thought life not worth living	0.077669	Self-harm behaviours
Ever self-harmed	0.051939	Self-harm behaviours
Ever self-harmed (non-suicidal)	0.0233424	Self-harm behaviours
Ever attempted suicide	0.0190649	Self-harm behaviours
Frequency of 'life not worth living' thoughts	0.0813931	Self-harm behaviours
Belief that own life is meaningful	-0.114766	Happiness and subjective well-being
Health satisfaction	-0.0718646	Happiness and subjective well-being
General happiness	-0.0995139	Happiness and subjective well-being
General happiness with own health	-0.0751124	Happiness and subjective well-being
Happiness	-0.102431	Happiness and subjective well-being
Family relationship satisfaction	-0.103886	Happiness and subjective well-being
Friendships satisfaction	-0.114783	Happiness and subjective well-being
Financial situation satisfaction	-0.0814058	Happiness and subjective well-being
Wellbeing	-0.108327	Happiness and subjective well-being
Model summary

## Sheet: Figure 2—Figure Supplement
Correlations (Pearson r) between twelve scores from eleven cognitive tests of the UK Biobank cognitive test battery (N = 31,614)
	(log)RT	FIS	NM	(log)TMT-numeric	(log)TMT-alphabetic	SDS	PAL	Tower Rear.	Matrix PC	(log1p)Pairs Match.	Picture Vocab.	Prospective Mem.
(log)RT	1
FIS	-0.15	1
NM	-0.12	0.37	1
(log)TMT-numeric	0.26	-0.27	-0.21	1
(log)TMT-alphabetic	0.29	-0.43	-0.34	0.5	1
SDS	-0.27	0.29	0.22	-0.42	-0.49	1
PAL	-0.12	0.3	0.19	-0.19	-0.27	0.24	1
Tower Rear.	-0.19	0.33	0.22	-0.3	-0.39	0.34	0.21	1
Matrix PC	-0.19	0.4	0.27	-0.3	-0.41	0.35	0.28	0.33	1
(log1p)Pairs Match.	0.13	-0.16	-0.11	0.19	0.24	-0.2	-0.13	-0.2	-0.19	1
Picture Vocab.	-0.05	0.43	0.22	-0.06	-0.17	0.05	0.23	0.12	0.25	-0.03	1
Prospective Mem.	-0.11	0.2	0.14	-0.16	-0.22	0.18	0.21	0.18	0.22	-0.1	0.12	1
