# Supplementary material for: Multimodal MRI marker of cognition explains the association between cognition and mental health in the UK Biobank
Source: eLife. 2026 May 20;14:RP108109. doi: 10.7554/eLife.108109 (PMC13189626; doi:10.7554/eLife.108109)
Supplement: Figure 3—source data 1. [file elife-108109-fig3-data1.xlsx]

## Sheet: Figure 3 dwMRI Pearson r
Predictive performance (bootstrapped Pearson r) of machine learning models based on 42 dwMRI neuroimaging phenotypes.
FA TBSS	FA Prob.	MD TBSS	MD Prob.	L1 TBSS	L1 Prob.	L2 TBSS	L2 Prob.	L3 TBSS	L3 Prob.	MO TBSS	MO Prob.	OD TBSS	OD Prob.	ICVF TBSS	ICVF Prob.	ISOVF TBSS	ISOVF Prob.	aparc.a2009s-I FA	aparc.a2009s-I Mean Length	aparc.a2009s-I SIFT2	aparc.a2009s-I Streamline Count	aparc-I FA	aparc-I Mean Length	aparc-I SIFT2	aparc-I Streamline Count	Glasser-I FA	Glasser-I Mean Length	Glasser-I SIFT2	Glasser-I Streamline Count	Glasser-IV FA	Glasser-IV Mean Length	Glasser-IV SIFT2	Glasser-IV Streamline Count	Schaefer200-I FA	Schaefer200-I Mean Length	Schaefer200-I SIFT2	Schaefer200-I Streamline Count	Schaefer500-IV FA	Schaefer500-IV Mean Length	Schaefer500-IV SIFT2	Schaefer500-IV Streamline Count
0.194326	0.137804	0.1849	0.190523	0.205255	0.17969	0.194917	0.186882	0.197757	0.174482	0.168882	0.0663721	0.170291	0.0949259	0.199608	0.158678	0.167469	0.144362	0.215095	0.206729	0.206689	0.234951	0.216639	0.219427	0.216392	0.227292	0.189671	0.17597	0.188629	0.182517	0.2088	0.18209	0.207333	0.197788	0.20408	0.197151	0.22505	0.220026	0.193937	0.151767	0.218026	0.2142
0.202636	0.145979	0.198376	0.194376	0.187942	0.179721	0.204063	0.172462	0.203697	0.187475	0.164652	0.088262	0.169642	0.0903322	0.194102	0.160934	0.170805	0.146464	0.210473	0.210558	0.214579	0.226104	0.214763	0.203726	0.226065	0.22641	0.193338	0.181229	0.189393	0.191424	0.189177	0.188239	0.21137	0.198429	0.196352	0.195342	0.219292	0.207851	0.205221	0.147268	0.203891	0.196293
0.195706	0.143802	0.196087	0.187746	0.198726	0.18159	0.200189	0.188857	0.184953	0.181509	0.168787	0.0782646	0.165562	0.0893406	0.197266	0.163924	0.172397	0.138494	0.213982	0.207717	0.213198	0.226258	0.209088	0.228483	0.221091	0.2126	0.193724	0.181866	0.18141	0.189573	0.203247	0.178896	0.198254	0.206977	0.208261	0.191662	0.219526	0.210643	0.195014	0.156404	0.200381	0.206962
0.206528	0.145109	0.177363	0.188558	0.198377	0.171416	0.207891	0.170201	0.191768	0.189949	0.16966	0.0784785	0.165167	0.0923123	0.19368	0.157694	0.173695	0.143877	0.210693	0.204421	0.206888	0.228187	0.225031	0.212108	0.224942	0.220694	0.190948	0.174239	0.204024	0.198793	0.195832	0.180705	0.200487	0.19461	0.214038	0.203445	0.222002	0.220713	0.185769	0.142777	0.206742	0.202813
0.197352	0.145291	0.190941	0.186253	0.198565	0.174001	0.21408	0.1896	0.195007	0.184183	0.155913	0.0765389	0.160232	0.0973847	0.210151	0.160301	0.16343	0.1509	0.214766	0.204157	0.212606	0.218586	0.212496	0.213409	0.226418	0.224887	0.179294	0.179147	0.197985	0.185429	0.201314	0.186468	0.208553	0.208785	0.209132	0.187908	0.221539	0.215016	0.186156	0.137912	0.204927	0.200557
0.201026	0.142801	0.196438	0.181108	0.195408	0.173581	0.20318	0.188861	0.19374	0.177195	0.158658	0.0792729	0.160204	0.105033	0.192536	0.165894	0.178814	0.148649	0.20477	0.213265	0.207931	0.221737	0.212528	0.212574	0.213137	0.213557	0.188328	0.180641	0.194769	0.195574	0.207949	0.181183	0.206355	0.205775	0.213649	0.193431	0.224453	0.226584	0.190289	0.151507	0.1958	0.203191
0.192898	0.138156	0.193464	0.182482	0.197227	0.172381	0.197649	0.174541	0.209716	0.179581	0.163048	0.0763028	0.173066	0.0981413	0.19838	0.160839	0.173162	0.152288	0.216608	0.207318	0.216803	0.215089	0.208604	0.219291	0.223827	0.219168	0.191417	0.17799	0.207765	0.197331	0.192373	0.179016	0.205887	0.199793	0.203387	0.197404	0.224073	0.220727	0.193458	0.143903	0.205051	0.198168
0.190814	0.135813	0.189403	0.182209	0.181702	0.174701	0.207542	0.175682	0.20022	0.176795	0.164597	0.0729788	0.158983	0.0989379	0.207067	0.161419	0.177952	0.146971	0.216356	0.204449	0.218475	0.220569	0.213724	0.227087	0.205092	0.229634	0.190463	0.172075	0.189424	0.186715	0.198202	0.184689	0.203524	0.211436	0.21021	0.19972	0.219237	0.219994	0.194803	0.133808	0.210234	0.196397
0.193105	0.136001	0.186886	0.182655	0.194252	0.184912	0.211285	0.18192	0.194411	0.179572	0.174774	0.0894681	0.157303	0.101461	0.198906	0.176831	0.167258	0.160492	0.213629	0.197084	0.205422	0.217964	0.206702	0.219889	0.219876	0.221749	0.194773	0.177576	0.196283	0.193402	0.190472	0.176568	0.217088	0.208839	0.200234	0.198567	0.221024	0.224817	0.197195	0.146624	0.1989	0.19687
0.201162	0.132841	0.200107	0.189362	0.196756	0.184563	0.200196	0.179408	0.19878	0.177516	0.157444	0.0708696	0.164643	0.0919474	0.183013	0.166316	0.165848	0.14916	0.198334	0.193478	0.203686	0.231579	0.220221	0.204227	0.228825	0.223035	0.194641	0.170014	0.204263	0.187475	0.203786	0.17563	0.202796	0.203767	0.201866	0.190555	0.22535	0.229878	0.189579	0.147904	0.200565	0.194432
0.193575	0.139565	0.197165	0.183862	0.196862	0.173065	0.215041	0.181296	0.197462	0.175152	0.168834	0.0681883	0.164148	0.0967436	0.19656	0.17529	0.18781	0.147539	0.206352	0.201338	0.195822	0.214844	0.213469	0.220737	0.227649	0.22932	0.203292	0.176369	0.184088	0.195559	0.209936	0.189474	0.198691	0.202905	0.207079	0.196004	0.210034	0.217068	0.18454	0.140002	0.204575	0.202057
0.183913	0.145296	0.190341	0.185393	0.202348	0.166477	0.204004	0.173124	0.21196	0.178718	0.16392	0.0728831	0.164555	0.100626	0.194946	0.168184	0.173197	0.144341	0.208592	0.214694	0.207799	0.227874	0.213069	0.209266	0.211723	0.216716	0.197039	0.170622	0.18815	0.194338	0.198516	0.175514	0.203462	0.202961	0.20231	0.199697	0.219643	0.224722	0.198626	0.136436	0.200398	0.197758
0.200772	0.146143	0.192816	0.190471	0.202274	0.180125	0.210578	0.17272	0.191705	0.187704	0.162105	0.0738044	0.152624	0.0937214	0.195331	0.176226	0.166021	0.156714	0.215337	0.207615	0.212107	0.221543	0.211296	0.20952	0.229282	0.221109	0.201263	0.184042	0.19731	0.193472	0.20056	0.177808	0.194128	0.20402	0.201798	0.200423	0.210761	0.223059	0.195673	0.132794	0.206542	0.194934
0.203338	0.128947	0.190076	0.176688	0.199507	0.176166	0.203311	0.177103	0.214159	0.195116	0.172802	0.0832282	0.161918	0.0896212	0.182909	0.159348	0.183031	0.145887	0.213058	0.210981	0.211728	0.22019	0.215819	0.219449	0.223884	0.219291	0.193981	0.176801	0.195652	0.195102	0.188635	0.182554	0.206949	0.201128	0.214167	0.196631	0.221316	0.2159	0.185845	0.133886	0.206527	0.188648
0.217188	0.13212	0.189882	0.18884	0.184656	0.17336	0.208581	0.182955	0.1998	0.180684	0.162579	0.0664983	0.162995	0.102429	0.194784	0.171974	0.174407	0.149828	0.204816	0.199372	0.20522	0.217896	0.214981	0.212841	0.2183	0.227963	0.193291	0.171069	0.195128	0.189124	0.207042	0.190955	0.202582	0.196064	0.199217	0.194157	0.229432	0.21761	0.193956	0.129264	0.20732	0.212357
0.198663	0.143365	0.195888	0.18633	0.196982	0.17397	0.203988	0.186256	0.200206	0.183167	0.158012	0.0831865	0.160458	0.090377	0.202972	0.171654	0.171898	0.157921	0.209768	0.206111	0.195914	0.216203	0.215799	0.214161	0.216877	0.222949	0.19026	0.177911	0.191061	0.18843	0.19469	0.188302	0.197238	0.201444	0.202602	0.193669	0.219761	0.214344	0.193447	0.140257	0.203893	0.20951
0.185532	0.143232	0.193893	0.191449	0.182882	0.17912	0.204973	0.177484	0.202126	0.1895	0.172653	0.0690325	0.162021	0.0844742	0.194828	0.169355	0.174487	0.143618	0.205398	0.214147	0.218049	0.233247	0.205536	0.225908	0.224038	0.222902	0.196698	0.188115	0.191511	0.191726	0.189514	0.181748	0.208479	0.203632	0.203428	0.204516	0.222672	0.225336	0.19263	0.145846	0.201889	0.20819
0.193331	0.137753	0.174417	0.181425	0.197634	0.183179	0.211134	0.17789	0.196033	0.183957	0.162671	0.0758919	0.166048	0.0892344	0.200543	0.170362	0.170301	0.153793	0.211687	0.214011	0.209381	0.220752	0.217696	0.212704	0.222762	0.208834	0.198925	0.17535	0.195129	0.201195	0.202931	0.188901	0.203026	0.190058	0.208647	0.198397	0.221139	0.213409	0.198368	0.148397	0.201038	0.20065
0.199538	0.140182	0.193498	0.190909	0.194194	0.175188	0.200306	0.190878	0.191196	0.188315	0.169136	0.0718447	0.164615	0.103121	0.185086	0.16547	0.166532	0.13988	0.210529	0.209346	0.211426	0.232903	0.206588	0.210917	0.219527	0.222467	0.186007	0.180232	0.183162	0.196694	0.197992	0.166287	0.196204	0.204588	0.200197	0.190237	0.220324	0.220873	0.196631	0.149558	0.206073	0.20787
0.200336	0.137291	0.194094	0.187303	0.187923	0.188395	0.209369	0.183374	0.201881	0.175399	0.17272	0.0766499	0.159341	0.090549	0.199471	0.163511	0.17499	0.151256	0.207507	0.211154	0.206553	0.221426	0.207171	0.216745	0.224323	0.220631	0.191331	0.177693	0.203835	0.191852	0.198813	0.183663	0.211404	0.208493	0.218775	0.199425	0.232492	0.220773	0.190023	0.140171	0.21148	0.193738
0.205342	0.13262	0.185407	0.177384	0.201433	0.178325	0.19448	0.176094	0.193021	0.185708	0.165286	0.0840528	0.153254	0.105388	0.211965	0.167002	0.173215	0.148917	0.205003	0.206467	0.216205	0.220198	0.216559	0.210411	0.226287	0.218318	0.195891	0.17395	0.189421	0.193259	0.198262	0.182739	0.209591	0.200815	0.203531	0.198477	0.212236	0.22011	0.181256	0.146561	0.202887	0.195564
0.180695	0.143733	0.198142	0.188871	0.198188	0.1687	0.206032	0.176555	0.194039	0.187177	0.166612	0.079885	0.167255	0.104984	0.193942	0.157463	0.171891	0.149462	0.216431	0.208573	0.227383	0.227928	0.214734	0.213133	0.22058	0.221648	0.193795	0.17414	0.19392	0.182919	0.200423	0.184543	0.200867	0.208104	0.216064	0.194268	0.221402	0.208908	0.188635	0.152772	0.20486	0.209187
0.196557	0.144194	0.188496	0.180059	0.188023	0.163058	0.203711	0.191446	0.183758	0.191752	0.173651	0.0706457	0.162438	0.108289	0.183641	0.158953	0.176634	0.15655	0.200564	0.213563	0.209109	0.226331	0.214435	0.204678	0.213379	0.21365	0.201367	0.177482	0.194512	0.185413	0.200148	0.184406	0.207545	0.195164	0.208621	0.188883	0.218691	0.221502	0.19523	0.141388	0.209601	0.199348
0.191578	0.139201	0.193698	0.185637	0.192531	0.172733	0.201432	0.169484	0.192686	0.175321	0.162001	0.0771101	0.156322	0.106137	0.197607	0.159653	0.177706	0.14915	0.210128	0.208574	0.208671	0.21784	0.206775	0.205703	0.223145	0.233105	0.187079	0.17854	0.200351	0.181881	0.197717	0.188873	0.21358	0.201116	0.207102	0.186816	0.216446	0.228087	0.193743	0.14238	0.209189	0.195541
0.193672	0.131473	0.187598	0.195808	0.201888	0.178875	0.21272	0.179644	0.198851	0.186896	0.153617	0.0781393	0.164378	0.10948	0.210946	0.150901	0.168078	0.141639	0.20621	0.207549	0.210255	0.234682	0.208994	0.217937	0.224763	0.227127	0.195094	0.177116	0.193096	0.182565	0.208534	0.1765	0.20888	0.197499	0.193258	0.197803	0.228004	0.220086	0.197194	0.146405	0.205205	0.199403
0.19719	0.136035	0.190811	0.188032	0.196047	0.17567	0.201525	0.173977	0.199408	0.189989	0.163653	0.0716925	0.163373	0.0882406	0.194376	0.165043	0.169045	0.144223	0.216438	0.204363	0.2168	0.216151	0.198391	0.213258	0.208591	0.214722	0.198805	0.18314	0.176989	0.18678	0.204476	0.182453	0.198532	0.203679	0.212796	0.197688	0.216211	0.210812	0.198975	0.148216	0.211819	0.198074
0.195375	0.14462	0.193461	0.194488	0.204534	0.180507	0.196737	0.176428	0.193249	0.178435	0.149935	0.0815658	0.163704	0.0956631	0.199331	0.149142	0.178461	0.148472	0.211418	0.215341	0.214635	0.233823	0.206245	0.216098	0.222706	0.22462	0.186323	0.184554	0.180765	0.189798	0.198699	0.178426	0.203455	0.194157	0.215547	0.201866	0.214387	0.21718	0.196701	0.144933	0.202557	0.200993
0.201947	0.141917	0.193444	0.186453	0.193018	0.175742	0.207258	0.181443	0.201521	0.173149	0.169896	0.0752289	0.156212	0.0859497	0.200619	0.168743	0.179066	0.153742	0.203545	0.197169	0.212592	0.22743	0.219537	0.218691	0.217889	0.222254	0.19252	0.183248	0.197953	0.183221	0.197921	0.182345	0.191042	0.200644	0.200625	0.196835	0.216243	0.214339	0.182523	0.136841	0.205741	0.207038
0.201619	0.14071	0.192746	0.192347	0.19915	0.178013	0.195256	0.174441	0.194639	0.187443	0.16061	0.0819343	0.162962	0.0954056	0.196176	0.154438	0.173469	0.15161	0.220089	0.202121	0.212139	0.224131	0.205569	0.206931	0.226397	0.228483	0.192282	0.169622	0.191028	0.187808	0.204234	0.188393	0.19598	0.195427	0.206983	0.191329	0.21992	0.215264	0.188507	0.149737	0.210211	0.196367
0.189879	0.138088	0.192207	0.186009	0.188853	0.168542	0.203314	0.177116	0.200158	0.179201	0.173931	0.0661628	0.173913	0.0794419	0.19198	0.172786	0.175111	0.149876	0.206888	0.203996	0.211422	0.230101	0.213902	0.205624	0.223304	0.229386	0.194884	0.176429	0.193416	0.181836	0.204356	0.18011	0.209577	0.205186	0.210543	0.194151	0.218377	0.214342	0.181401	0.144608	0.204403	0.204666
0.185197	0.145778	0.195182	0.178716	0.194876	0.183034	0.201599	0.187728	0.204294	0.19152	0.15001	0.0741814	0.160766	0.0932358	0.202255	0.161181	0.166886	0.134275	0.202223	0.196759	0.220729	0.228037	0.207595	0.209099	0.236522	0.227608	0.185755	0.189245	0.200833	0.184949	0.190725	0.190861	0.198173	0.182335	0.20301	0.193287	0.218413	0.222122	0.187934	0.145264	0.212776	0.196577
0.206561	0.134713	0.198309	0.194792	0.19513	0.170911	0.195623	0.179204	0.197456	0.191541	0.162559	0.0881824	0.162172	0.107881	0.214906	0.150659	0.179729	0.153608	0.21571	0.199529	0.206107	0.21986	0.21729	0.220634	0.221233	0.22342	0.199343	0.185893	0.194062	0.1888	0.201599	0.185507	0.204313	0.204173	0.201164	0.196789	0.222197	0.218975	0.190578	0.147881	0.202563	0.191688
0.195042	0.137888	0.194522	0.18378	0.195347	0.171262	0.203586	0.17751	0.193279	0.184165	0.16693	0.0745548	0.171424	0.0934461	0.192609	0.16719	0.173586	0.147766	0.222502	0.20194	0.209661	0.233106	0.204523	0.206563	0.222779	0.224291	0.205416	0.186046	0.207726	0.195358	0.191464	0.181243	0.197371	0.204125	0.208388	0.192095	0.220344	0.223548	0.179656	0.14465	0.211732	0.201695
0.195625	0.1423	0.193974	0.169697	0.194372	0.168342	0.204086	0.178649	0.201207	0.187113	0.156923	0.0830017	0.160699	0.10474	0.191813	0.15727	0.165197	0.148191	0.212638	0.209272	0.208951	0.213439	0.209782	0.206715	0.225584	0.223975	0.194422	0.177431	0.191588	0.191044	0.199885	0.1839	0.20335	0.201731	0.208767	0.196131	0.220198	0.209524	0.19937	0.134639	0.206822	0.19891
0.202985	0.143109	0.188497	0.196261	0.191162	0.172857	0.19688	0.181427	0.200991	0.177753	0.160328	0.0765652	0.150981	0.091808	0.194857	0.171491	0.161309	0.144358	0.212997	0.20579	0.215981	0.235937	0.220265	0.216514	0.224346	0.222458	0.192724	0.182563	0.195003	0.189286	0.20945	0.168751	0.206825	0.193595	0.221392	0.191131	0.208386	0.205058	0.192112	0.152686	0.202682	0.192586
0.211116	0.138347	0.192931	0.183515	0.189863	0.174753	0.208539	0.17959	0.19785	0.176933	0.162477	0.0781183	0.16902	0.104455	0.196786	0.151578	0.179032	0.155487	0.216864	0.203898	0.204297	0.228672	0.215203	0.221303	0.222542	0.22353	0.197215	0.18414	0.198101	0.184405	0.200523	0.164359	0.190282	0.205199	0.211293	0.207386	0.210442	0.221887	0.184467	0.13977	0.200139	0.20361
0.186192	0.135952	0.192937	0.185142	0.185318	0.170257	0.208226	0.16797	0.203334	0.180372	0.154331	0.0759843	0.154885	0.103395	0.202245	0.171599	0.17229	0.132752	0.206258	0.207257	0.215782	0.225173	0.212198	0.208829	0.224706	0.226707	0.188091	0.173846	0.200877	0.190416	0.185667	0.18123	0.195877	0.195884	0.209952	0.204957	0.210747	0.215816	0.190282	0.14438	0.203521	0.202168
0.205799	0.136026	0.192308	0.193891	0.20859	0.169178	0.208247	0.178347	0.208012	0.190772	0.157885	0.0707083	0.158161	0.0879826	0.188013	0.154294	0.1809	0.149803	0.210672	0.200191	0.209953	0.226562	0.211258	0.205052	0.213129	0.230684	0.183571	0.180328	0.19731	0.198481	0.189912	0.18188	0.210447	0.183935	0.214428	0.200417	0.21635	0.228528	0.198379	0.139501	0.200331	0.211847
0.195298	0.143524	0.200841	0.19138	0.193941	0.183448	0.201064	0.171872	0.198961	0.170112	0.157436	0.0715551	0.156671	0.0865425	0.195143	0.165025	0.167565	0.150651	0.202009	0.210443	0.214746	0.218509	0.2226	0.215962	0.230797	0.228572	0.197327	0.180511	0.194641	0.182685	0.198647	0.188361	0.192982	0.196421	0.209333	0.197366	0.224078	0.220842	0.187068	0.139345	0.206769	0.19905
0.198756	0.144963	0.181976	0.182024	0.203055	0.166653	0.207604	0.180363	0.2036	0.183155	0.168296	0.0733028	0.16813	0.0888591	0.196373	0.168059	0.17443	0.149218	0.222669	0.214699	0.212538	0.219417	0.218288	0.216086	0.221927	0.222335	0.191458	0.181759	0.187034	0.192014	0.19339	0.185193	0.211818	0.204951	0.201415	0.185813	0.223296	0.215143	0.196772	0.144794	0.205919	0.202779
0.200256	0.153313	0.19418	0.192433	0.18905	0.185565	0.202029	0.181605	0.204271	0.192558	0.166244	0.0773666	0.165662	0.0838676	0.204824	0.158179	0.170582	0.148751	0.209205	0.200741	0.207187	0.221035	0.208502	0.209375	0.221186	0.227066	0.20084	0.180134	0.181818	0.192162	0.19382	0.175637	0.202555	0.202819	0.206652	0.199245	0.211683	0.215046	0.19583	0.139187	0.206632	0.198684
0.193845	0.132107	0.198388	0.181919	0.186575	0.169949	0.208541	0.178685	0.199935	0.179194	0.158461	0.0837801	0.158924	0.0914721	0.197487	0.174309	0.169415	0.155416	0.210085	0.201627	0.20994	0.223221	0.204731	0.196932	0.221086	0.219383	0.191162	0.182871	0.185097	0.190489	0.199263	0.181644	0.196479	0.203777	0.212282	0.193422	0.203069	0.221088	0.193723	0.137029	0.218955	0.198151
0.207421	0.134125	0.186815	0.193034	0.189836	0.178361	0.206804	0.174365	0.207899	0.178871	0.159428	0.0728183	0.171655	0.100952	0.199864	0.157039	0.173315	0.1517	0.209321	0.205902	0.210293	0.224737	0.220684	0.217612	0.225671	0.231985	0.193902	0.173851	0.190325	0.186624	0.191707	0.176804	0.204725	0.208425	0.203708	0.189115	0.21934	0.219901	0.192887	0.146151	0.199954	0.201396
0.19787	0.142893	0.181363	0.184509	0.186422	0.176292	0.19844	0.177084	0.191853	0.188598	0.168677	0.0744726	0.162526	0.0824746	0.190602	0.161641	0.177814	0.144451	0.215958	0.20515	0.211884	0.223406	0.217139	0.20617	0.214122	0.222979	0.194276	0.176975	0.189141	0.186064	0.192973	0.17816	0.201581	0.202048	0.196685	0.193198	0.220001	0.22186	0.191911	0.149775	0.19718	0.200567
0.199378	0.131082	0.189544	0.191301	0.197885	0.17942	0.203209	0.174367	0.202911	0.186499	0.164928	0.0701656	0.1643	0.0984392	0.189749	0.166521	0.178587	0.146916	0.201176	0.208636	0.224066	0.213452	0.211637	0.226448	0.216968	0.229779	0.196844	0.181299	0.201521	0.187608	0.194043	0.182765	0.202602	0.205106	0.207891	0.184216	0.218497	0.211796	0.189944	0.141074	0.205507	0.200116
0.195749	0.133089	0.195867	0.182634	0.191301	0.178529	0.206215	0.17132	0.200726	0.172933	0.158726	0.0844184	0.158106	0.0951886	0.206646	0.170494	0.175283	0.140928	0.213248	0.195811	0.207956	0.230292	0.214664	0.214268	0.2122	0.226057	0.188612	0.186008	0.194618	0.194194	0.193674	0.182475	0.206814	0.203218	0.217763	0.185286	0.215765	0.214231	0.197441	0.145017	0.207084	0.209814
0.191061	0.142735	0.19296	0.187076	0.185856	0.165597	0.20979	0.175025	0.200619	0.175213	0.16112	0.0689808	0.15801	0.0951599	0.194619	0.17547	0.171248	0.151552	0.206541	0.202902	0.215797	0.220268	0.218928	0.21346	0.219915	0.232153	0.192001	0.186818	0.195267	0.19742	0.200292	0.171315	0.204294	0.203476	0.2015	0.187962	0.22332	0.22037	0.203422	0.139675	0.206487	0.202759
0.188779	0.142766	0.199427	0.186425	0.196422	0.17916	0.206347	0.189588	0.2097	0.171635	0.154578	0.0772541	0.170613	0.0955596	0.19144	0.154691	0.171243	0.143552	0.219726	0.20958	0.212534	0.215156	0.211707	0.207581	0.223461	0.220066	0.196242	0.174795	0.193394	0.200844	0.199692	0.178592	0.207978	0.191017	0.199058	0.196151	0.218116	0.213861	0.190456	0.135855	0.202308	0.205336
0.185664	0.140992	0.188987	0.183272	0.192496	0.171912	0.19615	0.175838	0.199315	0.184194	0.144679	0.0815512	0.161619	0.0961203	0.198368	0.163567	0.18015	0.141183	0.213799	0.210796	0.213127	0.227757	0.213125	0.208114	0.218934	0.216299	0.189003	0.187322	0.192657	0.19272	0.202309	0.186527	0.200847	0.19666	0.207846	0.181264	0.218387	0.214762	0.186865	0.151759	0.19728	0.204666
0.192546	0.134979	0.195289	0.187908	0.203582	0.177395	0.214596	0.179032	0.197052	0.185649	0.161734	0.0708944	0.161649	0.109595	0.199691	0.171418	0.172601	0.153416	0.201071	0.201583	0.207968	0.22451	0.211647	0.215514	0.216389	0.224105	0.189325	0.173929	0.186644	0.184534	0.203214	0.180563	0.209428	0.198053	0.200347	0.195874	0.218026	0.221602	0.18797	0.149734	0.200058	0.198757
0.200704	0.127662	0.187243	0.190042	0.192972	0.177646	0.195761	0.188317	0.193997	0.189833	0.156505	0.0710504	0.171163	0.0972747	0.196221	0.16883	0.182934	0.161139	0.204664	0.212598	0.207631	0.238692	0.211345	0.213188	0.226581	0.227094	0.198886	0.181285	0.186298	0.196631	0.204364	0.18029	0.211209	0.207787	0.211043	0.196066	0.218992	0.217368	0.191457	0.150153	0.204009	0.194625
0.192536	0.137873	0.202751	0.189714	0.198676	0.175647	0.207488	0.175213	0.198439	0.174055	0.158265	0.0800606	0.169306	0.0900355	0.193088	0.15461	0.171994	0.148472	0.21364	0.200319	0.210672	0.222337	0.202772	0.218735	0.211588	0.21667	0.194716	0.178058	0.192015	0.185889	0.199272	0.186073	0.201207	0.193875	0.219534	0.199338	0.224156	0.216039	0.192451	0.150603	0.208354	0.198163
0.201855	0.133968	0.192227	0.187439	0.194232	0.169819	0.198403	0.182218	0.203282	0.182487	0.162472	0.0767672	0.17029	0.097245	0.200403	0.166668	0.180642	0.143027	0.212336	0.202155	0.211917	0.222395	0.206023	0.209748	0.229913	0.21935	0.20455	0.178968	0.194063	0.18604	0.201712	0.178918	0.201146	0.195251	0.201417	0.196488	0.21976	0.212549	0.195733	0.145582	0.198933	0.208326
0.194589	0.135646	0.197321	0.201728	0.190557	0.16803	0.204986	0.174414	0.201333	0.189977	0.161046	0.0776941	0.155989	0.0862963	0.206261	0.160731	0.177298	0.150104	0.204915	0.210193	0.207078	0.216346	0.210274	0.214763	0.227548	0.228298	0.197124	0.172457	0.188617	0.190213	0.196655	0.178803	0.209472	0.208538	0.196058	0.193916	0.21911	0.217244	0.193087	0.14072	0.203203	0.207824
0.199448	0.146893	0.195775	0.193265	0.199226	0.181146	0.194847	0.174879	0.207963	0.172339	0.162565	0.0731198	0.162445	0.103258	0.192933	0.171678	0.171355	0.151423	0.215111	0.209672	0.21466	0.225826	0.210462	0.212224	0.22087	0.22211	0.187973	0.180458	0.190974	0.195852	0.19552	0.185688	0.215024	0.200284	0.199483	0.198301	0.216445	0.22212	0.186672	0.152973	0.205743	0.201719
0.20282	0.138293	0.190498	0.188836	0.199238	0.178464	0.206941	0.173324	0.194307	0.189791	0.169301	0.0791733	0.151428	0.101574	0.18453	0.164515	0.178245	0.1483	0.198781	0.206888	0.20737	0.219228	0.21573	0.211031	0.217695	0.224135	0.191757	0.184057	0.181036	0.194855	0.194444	0.185941	0.203999	0.197865	0.200776	0.19074	0.222413	0.22123	0.183305	0.144184	0.21529	0.202369
0.200004	0.138764	0.185724	0.191407	0.201179	0.178753	0.20935	0.175607	0.194372	0.18505	0.153911	0.0828778	0.16484	0.100444	0.20507	0.167697	0.181173	0.144381	0.206318	0.19695	0.214158	0.221324	0.205645	0.207618	0.21697	0.228173	0.20769	0.182151	0.19177	0.188894	0.19839	0.17188	0.206757	0.198576	0.211586	0.197317	0.223171	0.226122	0.196905	0.128957	0.198521	0.197184
0.205965	0.140937	0.194994	0.192986	0.195979	0.17004	0.192043	0.18323	0.201889	0.179963	0.160094	0.0682393	0.170811	0.0984415	0.197347	0.159494	0.166287	0.155759	0.204545	0.196266	0.215179	0.230131	0.210532	0.203378	0.218018	0.218671	0.196695	0.174109	0.191499	0.187505	0.203294	0.189318	0.202444	0.200717	0.203341	0.19265	0.225364	0.210583	0.187273	0.145776	0.198095	0.204057
0.200348	0.1338	0.196406	0.184837	0.202232	0.173592	0.201871	0.178978	0.193456	0.182415	0.161955	0.0848529	0.167934	0.0998606	0.190811	0.154826	0.176443	0.14361	0.211103	0.203451	0.215482	0.217018	0.217819	0.214491	0.227017	0.231944	0.192904	0.1873	0.194231	0.190568	0.198638	0.1719	0.20199	0.19857	0.20252	0.190188	0.225806	0.218565	0.1897	0.144228	0.206548	0.200903
0.193482	0.136359	0.186455	0.176767	0.199834	0.179376	0.200296	0.178424	0.197004	0.186593	0.157203	0.0845107	0.167734	0.0908891	0.198308	0.163203	0.174166	0.149576	0.217197	0.21395	0.207028	0.23634	0.205546	0.213323	0.223185	0.221157	0.194349	0.181772	0.191523	0.195176	0.18872	0.185316	0.210083	0.208559	0.216053	0.193219	0.219401	0.213005	0.192818	0.149383	0.2019	0.202248
0.201538	0.141841	0.17942	0.193659	0.190476	0.166577	0.201337	0.185757	0.20589	0.176357	0.172924	0.0793124	0.15991	0.0961712	0.185969	0.167062	0.1718	0.152423	0.211514	0.204821	0.2149	0.224615	0.209406	0.212533	0.221615	0.226764	0.199628	0.18443	0.190873	0.204486	0.199526	0.17758	0.192118	0.204256	0.21619	0.195706	0.220431	0.208974	0.201417	0.136425	0.211805	0.201384
0.185892	0.148297	0.192644	0.190733	0.188521	0.173683	0.207562	0.189668	0.207659	0.183281	0.154308	0.0677024	0.165631	0.101411	0.19189	0.157537	0.166414	0.146285	0.206154	0.20752	0.214247	0.222554	0.213098	0.203385	0.223896	0.227233	0.175271	0.168691	0.196571	0.195609	0.191123	0.179183	0.199942	0.208553	0.204475	0.195113	0.226718	0.218538	0.192646	0.141229	0.207506	0.205778
0.19264	0.134615	0.198328	0.188507	0.194453	0.180707	0.205448	0.175893	0.194766	0.185378	0.159822	0.0650198	0.158707	0.0996387	0.205725	0.158569	0.17368	0.150862	0.204738	0.213715	0.213515	0.229774	0.207517	0.21668	0.221656	0.218572	0.200002	0.181499	0.194342	0.190151	0.197002	0.183818	0.209497	0.203348	0.202333	0.19818	0.213077	0.214871	0.18577	0.145895	0.193864	0.203744
0.197246	0.142741	0.199227	0.186242	0.208223	0.181302	0.196499	0.184811	0.192846	0.187561	0.164071	0.082417	0.162	0.0918995	0.186023	0.164046	0.173113	0.156211	0.214837	0.203046	0.220094	0.225885	0.210722	0.207046	0.223131	0.223689	0.19636	0.179651	0.201504	0.203323	0.196694	0.191732	0.198393	0.207022	0.206712	0.199581	0.224948	0.221008	0.188332	0.149524	0.205827	0.196538
0.201139	0.141603	0.185967	0.183085	0.196399	0.171503	0.209929	0.18426	0.207156	0.187085	0.156363	0.0726342	0.164516	0.104105	0.198629	0.171227	0.165534	0.153078	0.206559	0.203679	0.207586	0.225432	0.221598	0.211156	0.213502	0.229171	0.19557	0.172965	0.194576	0.199391	0.206544	0.193359	0.190518	0.202061	0.210275	0.193038	0.216554	0.211788	0.196149	0.140435	0.207771	0.199352
0.195992	0.135197	0.190152	0.191895	0.190486	0.171975	0.206429	0.183981	0.196634	0.176848	0.174651	0.0822918	0.163266	0.0993	0.197753	0.169507	0.174848	0.152867	0.208549	0.204493	0.210593	0.224961	0.216735	0.212645	0.227613	0.222953	0.193121	0.188147	0.187755	0.198303	0.200722	0.18208	0.211524	0.191477	0.208826	0.187427	0.216895	0.209488	0.1874	0.147091	0.194	0.210568
0.207431	0.132747	0.179177	0.194595	0.19212	0.174483	0.205133	0.176917	0.198673	0.184253	0.172832	0.0700878	0.160559	0.102328	0.199178	0.163936	0.178472	0.145411	0.204709	0.207167	0.209496	0.214382	0.213774	0.211537	0.223432	0.212605	0.193095	0.177133	0.20759	0.198105	0.198641	0.179614	0.203505	0.20712	0.217048	0.19913	0.223876	0.22036	0.185815	0.14618	0.203356	0.212685
0.192215	0.137958	0.180222	0.189989	0.189336	0.178038	0.20206	0.174819	0.213987	0.187932	0.174348	0.0656841	0.168008	0.0869026	0.190887	0.163211	0.165993	0.142035	0.21764	0.198239	0.212115	0.229107	0.211978	0.211516	0.218699	0.22545	0.195015	0.173842	0.191322	0.189002	0.193942	0.188742	0.19993	0.193991	0.207456	0.198455	0.218576	0.227793	0.179149	0.143044	0.208222	0.204665
0.194109	0.14984	0.203491	0.181444	0.185249	0.17713	0.210014	0.178958	0.19479	0.188439	0.147172	0.0767761	0.161017	0.0942708	0.19431	0.168427	0.171566	0.143745	0.213359	0.209717	0.22127	0.225998	0.204959	0.212318	0.230481	0.226002	0.194463	0.184086	0.187353	0.187064	0.200299	0.168343	0.197405	0.192112	0.205067	0.202413	0.214467	0.214817	0.195319	0.145885	0.194511	0.200562
0.189489	0.142317	0.201442	0.184706	0.19969	0.171634	0.204014	0.19003	0.195	0.181685	0.165514	0.0772078	0.166768	0.0746473	0.208541	0.162057	0.174441	0.14969	0.220914	0.210494	0.206015	0.228573	0.216472	0.211143	0.233403	0.210128	0.195427	0.176789	0.19369	0.194411	0.202082	0.1772	0.194965	0.208659	0.207623	0.200997	0.217857	0.224313	0.190751	0.14385	0.209609	0.20935
0.185595	0.145585	0.194253	0.190025	0.203503	0.186684	0.213312	0.177799	0.184867	0.192489	0.172512	0.0768975	0.155073	0.105266	0.193303	0.162399	0.165914	0.140104	0.218798	0.211921	0.210854	0.214765	0.212302	0.208034	0.229107	0.23106	0.194568	0.185049	0.198153	0.188822	0.201455	0.181577	0.206261	0.196729	0.206563	0.190789	0.217691	0.226064	0.187326	0.146421	0.214584	0.199239
0.194383	0.139952	0.182316	0.190723	0.204787	0.169214	0.20408	0.181837	0.197667	0.180564	0.1534	0.0876354	0.170905	0.0895641	0.196455	0.165174	0.181145	0.144042	0.207824	0.202573	0.215336	0.220965	0.221032	0.216473	0.224249	0.226134	0.196854	0.176701	0.191803	0.18387	0.203889	0.180101	0.208071	0.199002	0.215504	0.195707	0.209711	0.219907	0.187483	0.158111	0.202993	0.201576
0.200611	0.149462	0.186752	0.187429	0.192809	0.176668	0.20958	0.178399	0.198784	0.182735	0.150729	0.0855838	0.163697	0.0860695	0.2009	0.160508	0.173259	0.146939	0.218788	0.19871	0.214561	0.225877	0.209527	0.208599	0.214247	0.215719	0.19135	0.183546	0.198106	0.19393	0.193939	0.183385	0.204611	0.196014	0.206776	0.192742	0.220077	0.21506	0.193586	0.14615	0.202401	0.209173
0.192082	0.146557	0.191436	0.191533	0.196324	0.15898	0.205093	0.165779	0.197343	0.178335	0.141991	0.0697265	0.172017	0.090109	0.198465	0.161187	0.179527	0.149549	0.208924	0.206088	0.209399	0.227776	0.222567	0.216577	0.217334	0.223626	0.190788	0.175961	0.188484	0.190711	0.200488	0.187141	0.199579	0.205279	0.208332	0.194981	0.212072	0.21182	0.188564	0.149451	0.197305	0.206551
0.206669	0.134027	0.189595	0.184496	0.200026	0.181065	0.200342	0.165344	0.209483	0.178836	0.168103	0.0772346	0.166901	0.0914082	0.192981	0.153774	0.18079	0.148154	0.208526	0.203436	0.217677	0.231162	0.221496	0.218529	0.220036	0.222187	0.193647	0.179122	0.192301	0.188768	0.202324	0.180339	0.208549	0.200383	0.20859	0.201089	0.217568	0.219711	0.189748	0.148827	0.204788	0.205731
0.187828	0.146129	0.18714	0.188561	0.198388	0.185713	0.203969	0.17303	0.203505	0.183119	0.165035	0.0672806	0.163859	0.0998256	0.200804	0.158933	0.178922	0.143375	0.20334	0.208229	0.218385	0.2267	0.21447	0.213849	0.231263	0.224421	0.192983	0.181921	0.187509	0.196873	0.193414	0.189367	0.196795	0.195707	0.207611	0.20489	0.219744	0.221987	0.192698	0.136554	0.215041	0.210562
0.194379	0.14518	0.196181	0.189765	0.193678	0.189584	0.204622	0.189338	0.18869	0.18182	0.151962	0.0739191	0.164604	0.104826	0.201042	0.174041	0.171023	0.153181	0.206676	0.202448	0.211363	0.219794	0.205209	0.217694	0.213825	0.218499	0.193305	0.17363	0.195614	0.19346	0.19989	0.183048	0.197612	0.196963	0.204853	0.186293	0.229634	0.216081	0.1894	0.151326	0.199632	0.206279
0.197996	0.145705	0.190725	0.20129	0.198396	0.175153	0.204303	0.182741	0.203804	0.186749	0.153733	0.0620994	0.157228	0.0960211	0.205733	0.162676	0.161042	0.15452	0.202534	0.211606	0.214169	0.227988	0.225131	0.202901	0.217412	0.209233	0.179492	0.178521	0.190446	0.187755	0.196919	0.181836	0.208236	0.206227	0.20906	0.190815	0.23609	0.220055	0.185642	0.139114	0.197797	0.193718
0.183679	0.127863	0.196196	0.201865	0.185705	0.172708	0.203956	0.180293	0.184381	0.197167	0.174122	0.0685162	0.163671	0.092924	0.197548	0.157655	0.169762	0.148108	0.207012	0.210299	0.210459	0.234091	0.220467	0.217273	0.222379	0.232064	0.192443	0.174742	0.187619	0.191443	0.19308	0.170541	0.201914	0.207281	0.207152	0.199113	0.226086	0.211853	0.196841	0.147036	0.203298	0.203097
0.197647	0.140512	0.185187	0.187922	0.197845	0.174558	0.200255	0.178146	0.199616	0.180739	0.173688	0.0664849	0.165339	0.0909775	0.188702	0.151274	0.17569	0.146966	0.205206	0.198376	0.203191	0.227384	0.214346	0.210858	0.215491	0.223503	0.191272	0.173296	0.184158	0.198303	0.206843	0.176593	0.202079	0.206519	0.198544	0.197404	0.227424	0.223402	0.195994	0.145001	0.198883	0.208119
0.202311	0.148516	0.195344	0.182683	0.18795	0.176987	0.209403	0.189663	0.194313	0.182774	0.151908	0.0765031	0.173828	0.0966599	0.194083	0.159954	0.174756	0.155117	0.215148	0.219838	0.215344	0.22733	0.216559	0.210945	0.22715	0.23246	0.194633	0.180279	0.192508	0.196659	0.206164	0.178117	0.206433	0.207544	0.203772	0.197063	0.20824	0.219197	0.193861	0.142237	0.196657	0.204802
0.196573	0.145845	0.187039	0.191658	0.194038	0.172205	0.200188	0.174275	0.20969	0.180344	0.158169	0.0746898	0.166115	0.0948365	0.195694	0.16212	0.169981	0.142993	0.206354	0.212667	0.21568	0.219111	0.213015	0.211118	0.207134	0.221314	0.190295	0.173638	0.202568	0.195054	0.191273	0.192941	0.197558	0.19754	0.219004	0.19464	0.214206	0.22394	0.180686	0.143165	0.197642	0.205996
0.203796	0.143247	0.180332	0.180447	0.188979	0.187569	0.211578	0.181973	0.195086	0.186375	0.141388	0.0746966	0.158826	0.0995868	0.192721	0.164738	0.170965	0.133024	0.209671	0.194139	0.214521	0.22292	0.219014	0.214962	0.213732	0.226425	0.193259	0.172716	0.189643	0.191594	0.190576	0.176166	0.193033	0.195625	0.201149	0.191584	0.209118	0.23126	0.197684	0.147817	0.204692	0.19895
0.19019	0.143531	0.200056	0.182218	0.190696	0.170655	0.21479	0.175126	0.200189	0.185443	0.15476	0.0737412	0.165693	0.0904591	0.195844	0.154802	0.168677	0.157263	0.218852	0.20991	0.210995	0.233304	0.20081	0.21128	0.225049	0.225395	0.187899	0.182701	0.191895	0.187662	0.190587	0.193046	0.204369	0.195219	0.201927	0.196116	0.218252	0.224993	0.196348	0.143356	0.207437	0.206405
0.192802	0.137269	0.191664	0.193198	0.188812	0.189612	0.211065	0.176538	0.192383	0.18474	0.162521	0.07783	0.166006	0.0911613	0.192869	0.159983	0.164932	0.144081	0.215753	0.212817	0.210786	0.231433	0.203622	0.214992	0.218546	0.217698	0.19147	0.174502	0.192885	0.195391	0.203494	0.177196	0.218508	0.203086	0.205935	0.191863	0.225471	0.218203	0.198895	0.145621	0.212867	0.217033
0.200389	0.143375	0.198053	0.191289	0.177278	0.177723	0.215494	0.187215	0.201748	0.190365	0.15487	0.0734376	0.145058	0.0962146	0.194968	0.161825	0.175257	0.152712	0.206725	0.204174	0.220951	0.230182	0.212091	0.216156	0.226344	0.226964	0.191531	0.170575	0.196059	0.185999	0.20037	0.176933	0.199714	0.208956	0.208893	0.198652	0.21332	0.216262	0.201086	0.137408	0.202903	0.196866
0.203734	0.140805	0.1983	0.196733	0.186969	0.180408	0.196299	0.175279	0.207156	0.192538	0.155775	0.0784503	0.162967	0.101746	0.197371	0.164536	0.184524	0.148342	0.210627	0.203594	0.215799	0.216899	0.214172	0.210354	0.217744	0.223652	0.184361	0.177464	0.181941	0.17736	0.211952	0.184129	0.205846	0.193548	0.20689	0.200202	0.208657	0.216202	0.18986	0.139234	0.194455	0.208383
0.195735	0.13161	0.186784	0.182886	0.187287	0.18845	0.206506	0.178201	0.192528	0.178097	0.157783	0.081927	0.164097	0.0926569	0.190392	0.158799	0.170156	0.149469	0.201362	0.203348	0.204761	0.221277	0.212624	0.200911	0.224079	0.215053	0.193604	0.177424	0.185706	0.189714	0.199206	0.178444	0.20063	0.191644	0.207972	0.186136	0.223667	0.216618	0.195791	0.141087	0.21222	0.195167
0.189849	0.143287	0.198292	0.195001	0.195702	0.1738	0.204078	0.175221	0.191487	0.177564	0.163109	0.0759653	0.15164	0.099514	0.192916	0.153917	0.170074	0.15363	0.212435	0.207518	0.225692	0.234735	0.220396	0.222014	0.213805	0.232207	0.193761	0.173189	0.188836	0.192186	0.186166	0.185569	0.199409	0.204919	0.210274	0.195167	0.233867	0.219244	0.191229	0.146338	0.210852	0.19139
0.19534	0.133838	0.190289	0.189889	0.199928	0.187362	0.208534	0.179614	0.186044	0.18672	0.168287	0.0816894	0.163264	0.0993338	0.198774	0.171909	0.181781	0.141302	0.216879	0.197356	0.208669	0.23348	0.210067	0.20736	0.226969	0.22476	0.195997	0.178755	0.19714	0.188631	0.202916	0.177989	0.205802	0.198562	0.202121	0.203462	0.213609	0.223662	0.191689	0.13806	0.206668	0.201368
0.192831	0.143075	0.185032	0.200807	0.199775	0.176405	0.189275	0.188055	0.201538	0.184194	0.15885	0.0701852	0.172659	0.0968336	0.198274	0.15948	0.175073	0.149101	0.209479	0.209262	0.200618	0.213243	0.217402	0.225648	0.216908	0.227492	0.186239	0.193208	0.207258	0.18474	0.186732	0.183303	0.20046	0.203195	0.200172	0.194379	0.218273	0.228711	0.204026	0.144076	0.198211	0.198252
0.201157	0.138361	0.19552	0.182098	0.196297	0.177008	0.217659	0.178865	0.192789	0.176748	0.160521	0.0820138	0.152502	0.103819	0.195074	0.172245	0.17316	0.144655	0.207942	0.209663	0.216725	0.216058	0.214079	0.207716	0.216504	0.219923	0.186751	0.177234	0.185856	0.196284	0.201334	0.171769	0.21209	0.196208	0.208445	0.18949	0.220617	0.215425	0.183175	0.132388	0.196547	0.206807
0.198629	0.145833	0.19158	0.189592	0.191783	0.174595	0.202724	0.176851	0.208018	0.183092	0.163786	0.073647	0.155846	0.102048	0.196839	0.162194	0.172008	0.135222	0.213524	0.205004	0.213768	0.230608	0.224038	0.21547	0.227524	0.211805	0.198019	0.169933	0.188798	0.190867	0.201354	0.182956	0.195437	0.20645	0.205138	0.199217	0.215968	0.214406	0.184933	0.143303	0.206469	0.193216
0.186664	0.13222	0.185494	0.19095	0.185761	0.172666	0.19558	0.17912	0.19864	0.168063	0.158062	0.0715722	0.157357	0.0952854	0.185159	0.170221	0.179503	0.157386	0.206571	0.202085	0.230174	0.216903	0.206873	0.213784	0.229054	0.23258	0.185802	0.16743	0.197132	0.197551	0.203592	0.174662	0.200036	0.197287	0.211464	0.191523	0.223299	0.222884	0.195464	0.140857	0.203273	0.206301
0.198769	0.147496	0.195397	0.189997	0.195045	0.184934	0.203515	0.175647	0.188532	0.181828	0.156236	0.0715374	0.168619	0.0932628	0.204993	0.162473	0.180803	0.14534	0.210817	0.215469	0.208895	0.227323	0.221056	0.219738	0.20934	0.228503	0.20014	0.182379	0.193948	0.18491	0.194182	0.182823	0.189648	0.213238	0.203006	0.180812	0.218192	0.229204	0.203772	0.151275	0.204532	0.205285
0.193018	0.137543	0.202182	0.191341	0.187594	0.174085	0.192071	0.18599	0.19659	0.19156	0.150872	0.0821734	0.166846	0.0988147	0.202995	0.171282	0.171158	0.148172	0.207108	0.215287	0.216676	0.229454	0.203354	0.218957	0.226971	0.227687	0.19332	0.178423	0.191306	0.197165	0.199403	0.177289	0.201539	0.201178	0.206428	0.202862	0.215729	0.217268	0.182956	0.142353	0.207944	0.207135
0.200419	0.137663	0.194815	0.191604	0.192076	0.177624	0.201073	0.176727	0.199703	0.185246	0.154829	0.0763964	0.14953	0.0965316	0.204848	0.160318	0.176622	0.143742	0.203979	0.204844	0.213561	0.232399	0.219589	0.215228	0.227645	0.224826	0.198433	0.17942	0.188258	0.192026	0.195088	0.180793	0.189975	0.198956	0.193897	0.195829	0.223728	0.222243	0.190292	0.137995	0.20264	0.203249
0.194635	0.148767	0.192522	0.179813	0.201743	0.169745	0.205076	0.177557	0.195063	0.178208	0.157793	0.0747868	0.164318	0.0866856	0.200073	0.171418	0.16583	0.155048	0.198869	0.208503	0.217726	0.217137	0.22305	0.212878	0.227673	0.218115	0.185168	0.182733	0.193944	0.189537	0.200907	0.18339	0.199787	0.21176	0.211725	0.197205	0.213375	0.216449	0.186531	0.137813	0.204453	0.197404
0.194362	0.146153	0.193778	0.190524	0.196352	0.177667	0.207737	0.189031	0.19397	0.193201	0.164627	0.0822688	0.177401	0.0963583	0.200033	0.170822	0.167513	0.138239	0.211076	0.198302	0.211396	0.238171	0.210051	0.213087	0.219727	0.225776	0.189048	0.17148	0.17964	0.192386	0.193478	0.184256	0.207383	0.191917	0.205244	0.197675	0.229379	0.215165	0.200223	0.147242	0.216325	0.197498
0.194721	0.144399	0.196079	0.199296	0.192396	0.169844	0.204604	0.185555	0.190729	0.179243	0.160423	0.0809265	0.166991	0.100416	0.187413	0.147101	0.176803	0.153056	0.213233	0.206827	0.215811	0.224732	0.213925	0.217445	0.223349	0.229283	0.20009	0.182968	0.196012	0.188098	0.195001	0.176958	0.20814	0.212038	0.206264	0.208711	0.221355	0.224484	0.188969	0.136255	0.203909	0.194677
0.206283	0.147748	0.189733	0.174381	0.199304	0.175071	0.201867	0.173555	0.200873	0.185237	0.160832	0.08154	0.158805	0.0987961	0.192216	0.167054	0.16648	0.151514	0.208666	0.20694	0.210937	0.228829	0.213614	0.220815	0.226012	0.222694	0.180385	0.182653	0.189791	0.192576	0.195817	0.174726	0.210742	0.209135	0.205453	0.202337	0.222821	0.216167	0.189038	0.15103	0.196621	0.197811
0.2066	0.129785	0.193908	0.18948	0.201218	0.172101	0.206519	0.182002	0.198927	0.17905	0.163498	0.0851136	0.163911	0.10042	0.194819	0.163536	0.179148	0.152574	0.205257	0.214805	0.215727	0.219781	0.203614	0.203181	0.228306	0.221386	0.185246	0.171647	0.191483	0.188287	0.200828	0.17859	0.203949	0.197693	0.214523	0.19935	0.210988	0.225823	0.194812	0.153185	0.193471	0.196115
0.202268	0.134121	0.194625	0.195388	0.188435	0.189688	0.204925	0.184529	0.193914	0.181718	0.172454	0.0839743	0.160511	0.104512	0.196016	0.161908	0.168749	0.149512	0.209763	0.208301	0.203204	0.226012	0.207013	0.210521	0.212574	0.208851	0.194808	0.175059	0.192768	0.19982	0.195369	0.178545	0.19712	0.198572	0.205216	0.194656	0.218041	0.225383	0.184164	0.137507	0.203191	0.196447
0.194235	0.14797	0.187158	0.177905	0.202304	0.170653	0.204621	0.175728	0.200071	0.189011	0.164936	0.0760692	0.167924	0.0955778	0.201624	0.160785	0.191277	0.153344	0.209458	0.205489	0.22284	0.212035	0.206862	0.210702	0.2213	0.225699	0.20301	0.183946	0.19739	0.188537	0.194336	0.182465	0.202749	0.195327	0.213289	0.193705	0.222856	0.208619	0.19976	0.145534	0.196717	0.205199
0.201586	0.150164	0.181854	0.184486	0.194113	0.184583	0.205225	0.193058	0.199607	0.183721	0.177469	0.08067	0.16133	0.0949989	0.195144	0.169626	0.168068	0.140773	0.204301	0.202315	0.21185	0.219268	0.210923	0.216523	0.21762	0.234449	0.198424	0.176	0.185218	0.197794	0.202603	0.191207	0.206898	0.199297	0.220589	0.189759	0.216647	0.214561	0.194383	0.149547	0.2049	0.198884
0.200887	0.145609	0.187748	0.193049	0.192291	0.173822	0.220671	0.184461	0.199252	0.184199	0.157878	0.0745854	0.176104	0.10012	0.196708	0.166089	0.17048	0.156091	0.209533	0.206664	0.209197	0.223904	0.215618	0.210218	0.222796	0.23235	0.194736	0.178288	0.191961	0.186122	0.203973	0.180872	0.207384	0.194641	0.206375	0.194561	0.229212	0.225349	0.183641	0.144909	0.202214	0.199543
0.192714	0.14206	0.187383	0.193259	0.192716	0.186219	0.199665	0.182371	0.201418	0.18493	0.168906	0.0723498	0.168543	0.0996046	0.190563	0.168149	0.17963	0.136232	0.206988	0.204984	0.218399	0.22901	0.218188	0.214839	0.224885	0.223366	0.200065	0.189019	0.195407	0.188791	0.190882	0.187827	0.205776	0.198141	0.199779	0.195983	0.225894	0.212237	0.196437	0.144901	0.204368	0.2053
0.188569	0.143745	0.191662	0.184783	0.194069	0.163958	0.203709	0.173929	0.188867	0.173844	0.154744	0.0678541	0.156273	0.0934052	0.193558	0.15778	0.165471	0.162316	0.207409	0.206922	0.205103	0.221862	0.199672	0.214276	0.233534	0.225023	0.192494	0.177533	0.18369	0.182951	0.207411	0.179414	0.20624	0.211208	0.200953	0.198859	0.208216	0.220672	0.184097	0.134633	0.206821	0.20357
0.190491	0.150591	0.192186	0.198574	0.180835	0.180616	0.211268	0.182424	0.192809	0.185036	0.154188	0.0753211	0.154452	0.0908684	0.190402	0.154586	0.170598	0.15811	0.208937	0.203133	0.213986	0.229432	0.207922	0.211408	0.213246	0.216192	0.185769	0.174189	0.202063	0.1883	0.195763	0.179428	0.208917	0.204234	0.213686	0.193144	0.224175	0.217438	0.185209	0.142462	0.206385	0.20296
0.192986	0.138687	0.20299	0.193415	0.202326	0.162705	0.203063	0.186368	0.202693	0.182006	0.153671	0.0768652	0.170776	0.0988214	0.200258	0.15754	0.175872	0.155338	0.212668	0.212004	0.206424	0.223115	0.207477	0.210972	0.22869	0.228641	0.192911	0.178521	0.18729	0.188337	0.203801	0.188915	0.202312	0.202201	0.204116	0.188717	0.229115	0.226668	0.195944	0.144798	0.197665	0.196963
0.200456	0.147634	0.187854	0.171243	0.20081	0.18559	0.208675	0.180641	0.196537	0.184884	0.164385	0.0703257	0.146778	0.100475	0.20619	0.170168	0.16322	0.162794	0.200355	0.212743	0.221579	0.227774	0.208103	0.212638	0.221726	0.210337	0.189201	0.179432	0.197441	0.197587	0.1962	0.18336	0.206599	0.196764	0.203287	0.186657	0.223584	0.211043	0.201094	0.140358	0.204364	0.198682
0.190163	0.131118	0.203007	0.179991	0.205916	0.172188	0.203958	0.17726	0.19642	0.185111	0.173393	0.0805978	0.162268	0.0989863	0.201202	0.167965	0.169896	0.157916	0.206536	0.20362	0.212915	0.22449	0.221653	0.210343	0.214692	0.218613	0.198297	0.175676	0.192437	0.193871	0.208341	0.180596	0.20711	0.196576	0.202871	0.20856	0.221864	0.2145	0.187914	0.154493	0.197686	0.195208
0.213733	0.135224	0.181848	0.195235	0.194603	0.176428	0.212896	0.188149	0.198613	0.184985	0.152754	0.0722429	0.158652	0.103298	0.196148	0.161769	0.170992	0.155395	0.202979	0.206887	0.218749	0.225751	0.215107	0.218617	0.230793	0.233247	0.189076	0.178107	0.193251	0.192483	0.195055	0.166884	0.193863	0.20724	0.207124	0.197068	0.217083	0.221227	0.190455	0.140612	0.192355	0.203312
0.181951	0.139323	0.19371	0.183782	0.181391	0.178568	0.208662	0.181306	0.194468	0.177135	0.158386	0.0728898	0.168811	0.10725	0.189968	0.164355	0.168358	0.138148	0.19926	0.201333	0.218239	0.213479	0.205656	0.211586	0.220355	0.223795	0.181238	0.171453	0.194359	0.194602	0.195567	0.182593	0.192816	0.205037	0.216687	0.194559	0.218197	0.210216	0.192777	0.143396	0.199326	0.20571
0.186836	0.14295	0.186461	0.20061	0.199809	0.183325	0.204326	0.186155	0.198843	0.182768	0.156061	0.0724414	0.164754	0.0837714	0.195285	0.167741	0.164227	0.144019	0.201393	0.199601	0.224818	0.223206	0.210743	0.212883	0.215075	0.219646	0.187227	0.173583	0.187255	0.184854	0.207748	0.185973	0.2058	0.201415	0.204813	0.195258	0.218385	0.207609	0.179173	0.138624	0.214335	0.197913
0.190146	0.142916	0.194234	0.190703	0.212686	0.171763	0.205622	0.176681	0.19463	0.181407	0.162779	0.0691595	0.171996	0.106252	0.199246	0.162187	0.177919	0.148133	0.20742	0.196985	0.215096	0.220775	0.218023	0.208486	0.213995	0.221173	0.196402	0.170381	0.202648	0.194893	0.195639	0.179074	0.202755	0.204601	0.22444	0.193702	0.219038	0.217356	0.198436	0.141663	0.202785	0.19095
0.193775	0.143122	0.191828	0.19116	0.19659	0.172373	0.208757	0.177691	0.201876	0.183743	0.179164	0.0798882	0.164201	0.0918044	0.19299	0.15834	0.179197	0.14566	0.219316	0.209475	0.212861	0.227607	0.203129	0.209903	0.217928	0.227662	0.189541	0.182326	0.186306	0.185774	0.201453	0.189118	0.203629	0.19852	0.203156	0.190268	0.213005	0.222906	0.181223	0.154706	0.200445	0.196739
0.204997	0.134553	0.195733	0.188221	0.202142	0.185364	0.199577	0.166642	0.198879	0.164897	0.165896	0.0715131	0.168458	0.107939	0.201077	0.159278	0.169359	0.156777	0.208117	0.210328	0.21318	0.215893	0.21822	0.208488	0.225263	0.224661	0.196367	0.17392	0.194361	0.18962	0.189528	0.174276	0.212842	0.200042	0.198377	0.194274	0.226845	0.211837	0.189027	0.149285	0.20403	0.201662
0.199365	0.149968	0.192783	0.182318	0.181923	0.179539	0.202897	0.178428	0.196367	0.194389	0.167113	0.085219	0.165372	0.0986401	0.210101	0.170289	0.17371	0.143593	0.203386	0.208292	0.19818	0.226429	0.216314	0.211588	0.216845	0.217601	0.189808	0.168131	0.195351	0.184955	0.197372	0.187901	0.205913	0.20523	0.201588	0.197829	0.211736	0.215891	0.194179	0.128837	0.203257	0.20055
0.186787	0.140633	0.187542	0.1899	0.190694	0.17412	0.205853	0.187683	0.208557	0.174839	0.153603	0.0775271	0.165692	0.0875417	0.193619	0.153259	0.176912	0.152635	0.207949	0.197557	0.205891	0.223728	0.214161	0.212182	0.216823	0.221235	0.190799	0.174124	0.197765	0.180528	0.197664	0.18073	0.202871	0.202766	0.207846	0.198463	0.217144	0.227406	0.186645	0.141281	0.200392	0.213269
0.198769	0.14943	0.190516	0.189172	0.191511	0.177749	0.208735	0.189571	0.20505	0.180287	0.156718	0.0844797	0.162796	0.0986359	0.198071	0.164866	0.186722	0.146013	0.21044	0.199806	0.211958	0.222723	0.216463	0.212257	0.212575	0.230807	0.20442	0.169316	0.18952	0.198047	0.199285	0.183926	0.203194	0.201791	0.200184	0.194573	0.218136	0.219074	0.188721	0.151498	0.198376	0.199521
0.196385	0.141244	0.206517	0.175774	0.189639	0.183521	0.197361	0.185826	0.190116	0.174218	0.156069	0.0730472	0.159411	0.101767	0.193389	0.172121	0.170373	0.148274	0.207007	0.200352	0.209818	0.218442	0.224575	0.210624	0.22646	0.222163	0.200141	0.176293	0.197441	0.195818	0.194602	0.174822	0.203866	0.200682	0.220865	0.199596	0.216348	0.21875	0.19379	0.151908	0.20192	0.202665
0.186979	0.149104	0.195069	0.186961	0.189291	0.174642	0.198355	0.187066	0.20422	0.181279	0.173179	0.0777044	0.163355	0.0882666	0.186947	0.156063	0.174721	0.143559	0.208399	0.199547	0.210772	0.213309	0.226598	0.213655	0.227913	0.224826	0.191401	0.173072	0.198691	0.199329	0.188701	0.180128	0.197644	0.205207	0.211419	0.20265	0.218533	0.2158	0.192832	0.143819	0.209817	0.199836
0.191817	0.134125	0.186991	0.1961	0.18951	0.172606	0.195244	0.168549	0.197255	0.183295	0.162077	0.0755958	0.162108	0.0853058	0.193984	0.164541	0.170003	0.140163	0.198459	0.206528	0.215595	0.224491	0.219602	0.217675	0.222971	0.222789	0.18761	0.185276	0.199819	0.189043	0.204254	0.170834	0.200446	0.191013	0.200045	0.191894	0.22682	0.211532	0.187899	0.146094	0.203931	0.201023
0.198539	0.133981	0.194427	0.18514	0.191285	0.181241	0.199745	0.181028	0.193723	0.187263	0.155096	0.0684318	0.1683	0.0981317	0.194453	0.160282	0.176881	0.147467	0.200403	0.209561	0.211679	0.221551	0.211151	0.213159	0.220774	0.225149	0.197575	0.179483	0.195373	0.191847	0.185983	0.179914	0.208169	0.204215	0.203814	0.180461	0.222516	0.224777	0.189125	0.148938	0.206782	0.194733
0.199927	0.148503	0.1891	0.193402	0.186161	0.186425	0.209065	0.187942	0.196621	0.189275	0.16201	0.075824	0.168958	0.101065	0.199659	0.164951	0.168551	0.14841	0.211008	0.199299	0.203381	0.2264	0.213537	0.21081	0.224471	0.229725	0.194183	0.18401	0.200449	0.184059	0.189214	0.184183	0.208252	0.203691	0.202067	0.191202	0.206102	0.216211	0.187653	0.152172	0.194589	0.199444
0.196099	0.14381	0.189913	0.191507	0.192657	0.187823	0.206197	0.178365	0.187109	0.191576	0.166694	0.0794351	0.160782	0.0999692	0.202748	0.172081	0.167205	0.145987	0.222019	0.207993	0.213072	0.229472	0.211506	0.198702	0.220571	0.223297	0.198201	0.177904	0.205208	0.1925	0.197705	0.180267	0.206504	0.201377	0.211943	0.204583	0.220762	0.214806	0.195121	0.147792	0.200907	0.199081
0.194201	0.138113	0.206041	0.193353	0.192019	0.174412	0.19566	0.174356	0.202998	0.189906	0.163678	0.0700382	0.166909	0.0967658	0.200771	0.164026	0.1666	0.158722	0.215167	0.205576	0.207133	0.221326	0.201748	0.210997	0.224475	0.22944	0.183396	0.177307	0.191504	0.187526	0.207462	0.181584	0.200876	0.194665	0.201266	0.195585	0.213427	0.223586	0.18333	0.137763	0.201886	0.192721
0.182655	0.148427	0.184837	0.186975	0.19004	0.17249	0.204034	0.184492	0.210074	0.179192	0.16658	0.085198	0.154888	0.105535	0.209884	0.166159	0.167401	0.146131	0.216564	0.204333	0.218113	0.227277	0.212323	0.213645	0.223573	0.219625	0.197583	0.176355	0.185496	0.181106	0.199414	0.18244	0.198539	0.202776	0.20619	0.197705	0.218081	0.213862	0.188418	0.139949	0.195089	0.204923
0.210636	0.134632	0.200561	0.185888	0.196909	0.175578	0.208119	0.181495	0.199737	0.186682	0.165701	0.0797121	0.163457	0.103521	0.197331	0.169877	0.165405	0.154637	0.213777	0.203343	0.21466	0.231837	0.212903	0.202975	0.223685	0.217628	0.196443	0.182058	0.194934	0.188412	0.19	0.168331	0.199251	0.199378	0.214109	0.19472	0.218218	0.204742	0.19216	0.149545	0.200393	0.202181
0.19435	0.136257	0.190045	0.195876	0.20051	0.169358	0.213758	0.171566	0.203911	0.185674	0.155518	0.0699601	0.17157	0.0854007	0.191757	0.159608	0.177644	0.144072	0.2119	0.207818	0.203652	0.226904	0.211524	0.215789	0.219287	0.21698	0.182737	0.181437	0.200456	0.185172	0.191527	0.171061	0.213048	0.198433	0.2019	0.195938	0.207903	0.214673	0.200482	0.138742	0.201152	0.204372
0.191314	0.145524	0.192809	0.191596	0.195477	0.179357	0.194662	0.177942	0.203908	0.187032	0.17045	0.0762949	0.160229	0.0921962	0.198942	0.174288	0.167945	0.148719	0.209132	0.208473	0.206858	0.220579	0.207616	0.220457	0.221387	0.230898	0.20394	0.175544	0.189694	0.183809	0.203247	0.187402	0.210129	0.21202	0.204231	0.195952	0.21725	0.218025	0.188614	0.137366	0.200234	0.197845
0.209678	0.137656	0.194111	0.198906	0.189167	0.185382	0.205	0.183918	0.195431	0.18131	0.162516	0.0823581	0.168318	0.0911974	0.207573	0.171402	0.170079	0.150317	0.215906	0.202382	0.217298	0.219033	0.204077	0.217266	0.236672	0.230319	0.196469	0.177537	0.1899	0.194113	0.194481	0.183722	0.201502	0.195468	0.213808	0.210919	0.218873	0.213017	0.192663	0.146136	0.207357	0.200783
0.191483	0.134892	0.195214	0.187733	0.196717	0.175584	0.211574	0.179055	0.198278	0.184204	0.167137	0.0708657	0.160062	0.0985426	0.193031	0.17745	0.173275	0.149584	0.207376	0.202313	0.209607	0.232212	0.217384	0.209276	0.21955	0.222719	0.184889	0.186111	0.19064	0.192756	0.20083	0.189495	0.203354	0.205718	0.207359	0.189497	0.219559	0.200444	0.187133	0.145425	0.203867	0.203058
0.203504	0.133274	0.191947	0.202907	0.192366	0.168585	0.207612	0.174257	0.199041	0.182136	0.151006	0.0829916	0.160541	0.101089	0.193872	0.165656	0.174332	0.151012	0.224769	0.212949	0.208355	0.216024	0.207763	0.217278	0.221997	0.229036	0.193154	0.183121	0.186009	0.194858	0.194369	0.178529	0.20353	0.192447	0.204469	0.196191	0.19967	0.220642	0.186044	0.145042	0.208437	0.195363
0.191999	0.142542	0.196934	0.182549	0.184702	0.185855	0.208547	0.182329	0.202014	0.172114	0.156033	0.0793425	0.16366	0.0909247	0.198535	0.167891	0.166988	0.150255	0.216664	0.205744	0.21174	0.233718	0.214465	0.203512	0.225248	0.224537	0.199912	0.179558	0.194887	0.195615	0.193399	0.178406	0.201591	0.201741	0.197169	0.192725	0.228633	0.215757	0.19247	0.155646	0.207124	0.196484
0.196277	0.134029	0.194885	0.18896	0.201706	0.175957	0.203069	0.182853	0.194862	0.188641	0.167927	0.0781702	0.160005	0.0984618	0.200347	0.162312	0.164791	0.145681	0.210726	0.203281	0.212129	0.21951	0.205983	0.209905	0.218328	0.215544	0.202269	0.17925	0.189527	0.183458	0.191933	0.179201	0.200473	0.20419	0.198689	0.195808	0.227774	0.20494	0.184923	0.139638	0.199954	0.199529
0.194072	0.136421	0.20067	0.1844	0.198862	0.179343	0.211933	0.185457	0.189857	0.17654	0.154787	0.0758743	0.16377	0.103078	0.194255	0.156664	0.166615	0.146572	0.203575	0.210823	0.219507	0.217855	0.219404	0.211073	0.219467	0.227627	0.205541	0.179191	0.194051	0.185199	0.198959	0.176566	0.199869	0.205035	0.200764	0.200075	0.218484	0.213013	0.193016	0.137236	0.208163	0.197565
0.196414	0.137892	0.191333	0.187958	0.202213	0.173601	0.20775	0.179731	0.199238	0.186509	0.16199	0.0750201	0.160062	0.0929924	0.198339	0.165013	0.17903	0.151674	0.205644	0.199816	0.20959	0.226528	0.208345	0.204874	0.22777	0.22293	0.179992	0.18176	0.198118	0.187738	0.195076	0.173692	0.201804	0.204983	0.220137	0.216342	0.215307	0.232282	0.193868	0.135242	0.212011	0.208352
0.190656	0.147032	0.19675	0.182438	0.186672	0.184911	0.197082	0.181788	0.214134	0.177533	0.16025	0.0815936	0.161017	0.0955823	0.195585	0.170049	0.16517	0.146177	0.1992	0.214106	0.217146	0.232745	0.219923	0.214465	0.215582	0.225409	0.19076	0.170021	0.185256	0.186579	0.194715	0.180346	0.206525	0.194069	0.213745	0.200665	0.220678	0.210525	0.196706	0.137185	0.206799	0.19583
0.190904	0.137245	0.18836	0.184558	0.200022	0.174098	0.199531	0.180364	0.194926	0.17787	0.160292	0.0824894	0.18094	0.0880415	0.193316	0.16135	0.164555	0.15442	0.201885	0.19578	0.214807	0.223849	0.216018	0.218136	0.222382	0.240068	0.190727	0.184736	0.193581	0.191802	0.196562	0.183539	0.214158	0.201033	0.207348	0.187879	0.216632	0.223831	0.191502	0.143387	0.195851	0.194289
0.199657	0.144099	0.191464	0.182323	0.182963	0.175153	0.195062	0.179349	0.200188	0.191778	0.16327	0.0906438	0.154444	0.101004	0.200083	0.162716	0.162822	0.149698	0.211901	0.193373	0.216723	0.221312	0.217264	0.213333	0.209437	0.233304	0.199664	0.185823	0.188726	0.18701	0.199206	0.172555	0.197428	0.200893	0.206968	0.200795	0.220756	0.224374	0.199876	0.150588	0.211287	0.211644
0.19898	0.137142	0.180914	0.19479	0.18946	0.16548	0.203927	0.177204	0.201281	0.186515	0.151936	0.0670444	0.164065	0.0936453	0.191913	0.155748	0.169732	0.144905	0.212831	0.21163	0.207251	0.22642	0.210179	0.213034	0.221277	0.23951	0.190025	0.182159	0.193977	0.193185	0.204672	0.186066	0.20501	0.21163	0.204774	0.194827	0.218074	0.216623	0.177788	0.142536	0.208521	0.201767
0.195899	0.140385	0.194211	0.186148	0.200617	0.177387	0.200326	0.186621	0.202672	0.181119	0.160749	0.0718072	0.167403	0.0980702	0.201713	0.161847	0.176827	0.142486	0.207353	0.206798	0.222062	0.223426	0.207431	0.211676	0.230462	0.223555	0.190023	0.183292	0.192892	0.188264	0.198173	0.182211	0.202627	0.199394	0.204473	0.192753	0.223305	0.217055	0.18709	0.149533	0.215218	0.211244
0.182658	0.141777	0.187956	0.18976	0.191685	0.176876	0.194806	0.18116	0.186422	0.18752	0.161371	0.082032	0.170709	0.101009	0.197663	0.16564	0.181764	0.148278	0.212488	0.206421	0.213014	0.220978	0.220459	0.221575	0.212279	0.222747	0.197871	0.188946	0.198366	0.177417	0.196543	0.186738	0.204675	0.209836	0.205321	0.201116	0.22226	0.224947	0.200935	0.139643	0.205185	0.199181
0.205175	0.143415	0.196195	0.188705	0.197184	0.176979	0.199567	0.178572	0.194315	0.182009	0.161281	0.0690868	0.161454	0.0834597	0.194325	0.169657	0.175375	0.150128	0.200707	0.211185	0.206891	0.230499	0.216411	0.2152	0.212888	0.216958	0.175435	0.177974	0.187422	0.183518	0.198772	0.181592	0.205642	0.199332	0.210204	0.190266	0.211551	0.221613	0.191983	0.150523	0.200223	0.211072
0.200283	0.147236	0.189549	0.187307	0.195305	0.191815	0.204192	0.176864	0.202412	0.177414	0.156709	0.0873733	0.156909	0.101596	0.201549	0.165597	0.167379	0.137243	0.217544	0.207759	0.214926	0.219764	0.222622	0.21396	0.212698	0.236642	0.20325	0.187247	0.189693	0.183318	0.19645	0.17589	0.202219	0.201881	0.203211	0.18844	0.224766	0.215942	0.196903	0.147496	0.206734	0.206874
0.200661	0.146301	0.195865	0.187466	0.202045	0.183477	0.210156	0.16765	0.185208	0.190308	0.156952	0.0811187	0.158924	0.076892	0.197638	0.150398	0.167555	0.144643	0.201135	0.207716	0.204422	0.214137	0.210748	0.221119	0.220776	0.214226	0.198877	0.182456	0.193646	0.180373	0.1985	0.181528	0.196235	0.196047	0.199897	0.187607	0.2108	0.212937	0.195819	0.139927	0.200724	0.20232
0.194425	0.139377	0.194784	0.190724	0.190336	0.170639	0.197969	0.176859	0.195375	0.179504	0.15558	0.0674825	0.160818	0.104203	0.197567	0.172496	0.172627	0.145654	0.207079	0.207552	0.21916	0.227943	0.221798	0.204005	0.219784	0.222177	0.196037	0.17762	0.202925	0.184911	0.193211	0.183396	0.199758	0.200291	0.212273	0.184044	0.212661	0.235188	0.184832	0.147567	0.205006	0.205972
0.177728	0.141788	0.203955	0.180694	0.195754	0.171529	0.207341	0.179836	0.204163	0.186663	0.165901	0.0873613	0.172082	0.0878442	0.200291	0.149159	0.184929	0.147122	0.207173	0.199402	0.20442	0.219584	0.203298	0.214083	0.218031	0.220436	0.191325	0.177272	0.199687	0.179126	0.198618	0.17395	0.205998	0.202924	0.211128	0.194858	0.221484	0.218258	0.200841	0.141174	0.191303	0.209554
0.187227	0.139474	0.181522	0.187608	0.193288	0.184001	0.198583	0.180311	0.206206	0.183103	0.168435	0.0684884	0.158132	0.104499	0.204489	0.155117	0.17024	0.143821	0.211116	0.214109	0.216743	0.229208	0.21091	0.214119	0.213712	0.221584	0.196608	0.172096	0.185056	0.197546	0.19439	0.179847	0.208517	0.202793	0.202083	0.203486	0.212046	0.220298	0.195066	0.1358	0.211359	0.199583
0.195567	0.154449	0.197185	0.179439	0.189746	0.180496	0.206183	0.176102	0.203962	0.181602	0.156526	0.070226	0.158925	0.0846644	0.198416	0.170119	0.168601	0.145386	0.210758	0.202934	0.207514	0.220049	0.21657	0.218459	0.217476	0.221735	0.195733	0.179479	0.180592	0.189832	0.200633	0.190289	0.204979	0.200565	0.201236	0.197341	0.215559	0.223645	0.190197	0.141843	0.209935	0.20279
0.199663	0.133913	0.196166	0.179844	0.202991	0.171381	0.215114	0.184563	0.196653	0.178748	0.166297	0.0770843	0.16676	0.095103	0.197447	0.168473	0.166985	0.15551	0.213082	0.207881	0.21523	0.216802	0.211549	0.228764	0.230197	0.224336	0.186562	0.175526	0.190139	0.186996	0.195842	0.183359	0.193741	0.198752	0.215474	0.198584	0.213383	0.217832	0.194329	0.144714	0.200498	0.207296
0.190172	0.150634	0.187112	0.185736	0.193383	0.178455	0.210554	0.179332	0.201496	0.186678	0.166797	0.0802103	0.171958	0.0986413	0.202728	0.158989	0.175755	0.150565	0.207205	0.206302	0.212494	0.225331	0.214673	0.214984	0.216054	0.222032	0.191008	0.178757	0.197132	0.182676	0.190309	0.171464	0.200307	0.196381	0.216588	0.20647	0.218791	0.215406	0.186561	0.138888	0.208755	0.205559
0.192519	0.148462	0.184938	0.18742	0.188398	0.17454	0.196103	0.177884	0.203773	0.180507	0.164286	0.0677469	0.165185	0.0988135	0.197664	0.165948	0.169231	0.156028	0.207727	0.203871	0.200065	0.212073	0.213789	0.205513	0.222182	0.217573	0.196909	0.180836	0.192632	0.182236	0.198945	0.179862	0.207279	0.209061	0.206176	0.205437	0.221554	0.21792	0.190955	0.145993	0.206968	0.211432
0.190754	0.133144	0.19427	0.194491	0.191039	0.172758	0.217435	0.168277	0.197637	0.178119	0.163615	0.079975	0.165744	0.101123	0.197564	0.157921	0.177881	0.154946	0.222067	0.216212	0.207005	0.219292	0.213427	0.218745	0.225095	0.220653	0.193983	0.166302	0.184607	0.19134	0.191622	0.178646	0.211498	0.20774	0.212942	0.198596	0.211179	0.221188	0.190268	0.139612	0.194496	0.206396
0.200609	0.140249	0.194138	0.194343	0.200936	0.171078	0.195304	0.187801	0.200576	0.176624	0.164735	0.0786621	0.154744	0.0968206	0.196114	0.157483	0.178939	0.144428	0.219609	0.202194	0.211124	0.230438	0.207486	0.220238	0.211418	0.228151	0.195053	0.179988	0.20365	0.178602	0.188587	0.175687	0.211984	0.200051	0.205888	0.196337	0.21899	0.22705	0.188639	0.132959	0.203832	0.211431
0.183725	0.147413	0.183573	0.183313	0.193028	0.183892	0.199706	0.182466	0.196745	0.178724	0.176405	0.0870542	0.165873	0.0986819	0.197859	0.16656	0.178186	0.151751	0.203961	0.1949	0.217734	0.222411	0.20816	0.207274	0.224355	0.214829	0.189666	0.182478	0.188179	0.192361	0.193059	0.18194	0.200738	0.196389	0.217113	0.192088	0.216732	0.22285	0.18848	0.142091	0.203561	0.202543
0.19603	0.135886	0.200455	0.199625	0.194733	0.1785	0.20046	0.177857	0.186678	0.176312	0.16318	0.0703006	0.156197	0.107748	0.19927	0.156778	0.168337	0.145219	0.22144	0.201875	0.214969	0.227024	0.207713	0.21765	0.22249	0.226853	0.192431	0.175225	0.190526	0.195495	0.203846	0.180422	0.203578	0.194817	0.213808	0.199173	0.222388	0.217396	0.197972	0.142225	0.207607	0.204807
0.193996	0.133904	0.19789	0.192258	0.181323	0.17074	0.201128	0.177548	0.197077	0.188815	0.160197	0.0668571	0.172329	0.0970226	0.201459	0.173991	0.175993	0.152154	0.217519	0.203715	0.20872	0.220007	0.215655	0.211116	0.219251	0.220909	0.197919	0.180381	0.197723	0.184748	0.197006	0.181916	0.195593	0.197582	0.201582	0.186969	0.21881	0.21532	0.193298	0.139107	0.207846	0.191314
0.18978	0.141848	0.194946	0.179037	0.207536	0.185808	0.200903	0.189467	0.200722	0.188279	0.155353	0.0746446	0.156879	0.0957533	0.210983	0.168402	0.176221	0.155058	0.202155	0.214492	0.215098	0.2179	0.203271	0.201778	0.221242	0.22031	0.192468	0.17564	0.189016	0.195057	0.193443	0.177393	0.217997	0.202059	0.210722	0.195092	0.218353	0.229907	0.191504	0.144905	0.201187	0.207553
0.185603	0.141993	0.200536	0.187589	0.188268	0.171021	0.207221	0.178066	0.189926	0.17996	0.159158	0.0798327	0.161046	0.0936663	0.186268	0.160313	0.176598	0.143562	0.21263	0.2094	0.215056	0.223173	0.212933	0.212752	0.209746	0.220032	0.191628	0.184747	0.190268	0.18595	0.197505	0.175233	0.214985	0.202399	0.203644	0.194914	0.21736	0.223925	0.191957	0.134664	0.207105	0.197447
0.202761	0.146093	0.195955	0.182576	0.20059	0.174281	0.211783	0.189888	0.193748	0.177767	0.166549	0.0782695	0.16147	0.0928283	0.19552	0.166796	0.168915	0.145661	0.209643	0.2063	0.209844	0.228444	0.21273	0.206032	0.220867	0.214835	0.198436	0.188111	0.190944	0.198173	0.185905	0.182202	0.207359	0.194389	0.215836	0.188262	0.208471	0.214919	0.187622	0.144561	0.207507	0.198657
0.194034	0.147316	0.191622	0.187858	0.195798	0.179558	0.210684	0.184586	0.202458	0.183425	0.164971	0.0767142	0.157258	0.102299	0.186689	0.151055	0.160839	0.146677	0.21212	0.206063	0.218277	0.222614	0.214261	0.210776	0.212952	0.21769	0.191873	0.17965	0.197009	0.191775	0.191757	0.185619	0.205959	0.212438	0.217842	0.207141	0.204936	0.213541	0.198688	0.152176	0.202362	0.203928
0.19536	0.141586	0.190045	0.184327	0.192003	0.180254	0.199433	0.182384	0.201827	0.176011	0.161728	0.0686529	0.157029	0.093449	0.199796	0.169925	0.173793	0.154284	0.208101	0.203338	0.215543	0.220661	0.208016	0.210913	0.216934	0.221376	0.184922	0.183256	0.193958	0.191665	0.197069	0.17938	0.20705	0.194171	0.20983	0.193624	0.213366	0.210325	0.186599	0.140243	0.202556	0.20397
0.197805	0.13476	0.201124	0.193461	0.20072	0.175873	0.208776	0.178304	0.196876	0.183187	0.157861	0.0762985	0.168118	0.0992199	0.191693	0.163576	0.168545	0.135775	0.208516	0.207699	0.210704	0.214336	0.212515	0.220487	0.221831	0.218866	0.18704	0.181505	0.192257	0.195955	0.200243	0.183014	0.208033	0.198252	0.19508	0.201509	0.216027	0.221235	0.191529	0.154998	0.217211	0.201854
0.193523	0.135637	0.183494	0.198492	0.188382	0.184337	0.207245	0.167751	0.197465	0.182208	0.159541	0.0706523	0.154833	0.0959879	0.193979	0.168164	0.17829	0.149509	0.198714	0.206305	0.209799	0.216853	0.213879	0.215714	0.218196	0.225963	0.199041	0.180312	0.196298	0.199216	0.194211	0.187993	0.206783	0.207663	0.201763	0.200605	0.217365	0.227298	0.180184	0.140637	0.196497	0.206095
0.196949	0.136786	0.200893	0.189103	0.193095	0.173509	0.211799	0.185943	0.194455	0.18357	0.17299	0.0644552	0.161135	0.103795	0.1908	0.165709	0.174538	0.15331	0.211762	0.20668	0.217727	0.232159	0.222795	0.211555	0.217554	0.217083	0.190467	0.180158	0.185332	0.191355	0.199619	0.180324	0.20499	0.200928	0.216362	0.194743	0.21854	0.216962	0.185731	0.146654	0.210481	0.196513
0.206352	0.141169	0.183224	0.201426	0.199257	0.176817	0.206928	0.182911	0.206263	0.18681	0.156051	0.0654383	0.177023	0.108548	0.200621	0.16623	0.165468	0.148534	0.218045	0.201742	0.220484	0.224148	0.21405	0.220553	0.220472	0.232385	0.184296	0.181841	0.187533	0.196004	0.189186	0.188083	0.205176	0.20066	0.219123	0.197767	0.214718	0.214676	0.190318	0.143656	0.207073	0.207234
0.2039	0.136415	0.191179	0.192125	0.186137	0.158086	0.206732	0.171499	0.196895	0.186036	0.162599	0.0810132	0.164575	0.091885	0.205651	0.173186	0.175337	0.148808	0.210296	0.215802	0.210873	0.224663	0.211742	0.211387	0.218403	0.224348	0.174277	0.179195	0.197479	0.18998	0.196203	0.186328	0.195745	0.208902	0.203331	0.195624	0.220684	0.223501	0.202954	0.156395	0.211832	0.202472
0.188724	0.141911	0.18784	0.183253	0.192937	0.173227	0.2028	0.171316	0.192119	0.179837	0.174884	0.0715215	0.168088	0.102048	0.1958	0.171319	0.1808	0.144063	0.213315	0.212366	0.211896	0.217334	0.210874	0.206559	0.220357	0.232302	0.185163	0.180934	0.192665	0.182644	0.18969	0.185392	0.205258	0.194678	0.198755	0.194171	0.223771	0.217835	0.193926	0.140962	0.204287	0.196563
0.191861	0.13812	0.18736	0.18206	0.195526	0.171614	0.199005	0.178023	0.202724	0.180033	0.162334	0.0830924	0.160136	0.103361	0.197858	0.162798	0.17208	0.138813	0.206147	0.202832	0.224874	0.222948	0.214183	0.218098	0.220002	0.206258	0.185758	0.176793	0.200595	0.182937	0.198912	0.192022	0.209286	0.201901	0.211818	0.20497	0.21062	0.219756	0.190862	0.154638	0.204392	0.195917
0.191678	0.146172	0.203156	0.185507	0.195229	0.171213	0.20233	0.165755	0.203549	0.17373	0.166092	0.0679045	0.15959	0.0982239	0.199466	0.154108	0.170486	0.146813	0.202972	0.204921	0.211015	0.225896	0.218549	0.20964	0.219971	0.229733	0.204902	0.178357	0.197329	0.190284	0.191768	0.178838	0.21474	0.192056	0.210028	0.207289	0.22263	0.225823	0.189761	0.145623	0.211604	0.193841
0.199294	0.143868	0.198364	0.184456	0.194618	0.173886	0.208825	0.178404	0.18991	0.180348	0.163531	0.0749348	0.16946	0.0953022	0.186771	0.162022	0.175588	0.147005	0.20467	0.212847	0.215577	0.227865	0.221768	0.223168	0.224326	0.215489	0.198569	0.179533	0.193678	0.191957	0.189915	0.179014	0.207443	0.199607	0.206841	0.205536	0.227833	0.216932	0.186871	0.144188	0.205364	0.196271
0.197091	0.131299	0.197908	0.183989	0.206567	0.165545	0.206534	0.174725	0.192325	0.187094	0.169985	0.0669241	0.167212	0.0925835	0.206175	0.161969	0.17324	0.147203	0.207156	0.202803	0.213492	0.221967	0.223036	0.218169	0.226196	0.22585	0.189799	0.178129	0.188024	0.189028	0.196873	0.192438	0.193923	0.203175	0.209479	0.194262	0.217702	0.208469	0.197254	0.15141	0.210663	0.203469
0.193894	0.131697	0.189594	0.188489	0.184906	0.17491	0.198296	0.178559	0.191862	0.184534	0.163598	0.0859754	0.161472	0.103578	0.201615	0.167139	0.176194	0.145734	0.216755	0.207418	0.213588	0.231145	0.211731	0.216398	0.21581	0.230319	0.187286	0.17949	0.194321	0.183316	0.187406	0.184963	0.204495	0.216435	0.214378	0.19083	0.223269	0.225042	0.185735	0.148611	0.196402	0.197244
0.185678	0.136089	0.184596	0.188262	0.209788	0.167086	0.203824	0.176715	0.20418	0.182779	0.156452	0.0754864	0.166663	0.0997365	0.19568	0.161293	0.175048	0.142846	0.208396	0.206487	0.199418	0.224314	0.210379	0.211535	0.228987	0.221133	0.177894	0.174092	0.194901	0.190045	0.192696	0.181311	0.199364	0.2005	0.213133	0.192916	0.219768	0.218901	0.20048	0.140834	0.193981	0.212341
0.19951	0.142159	0.188102	0.190312	0.198923	0.18134	0.202258	0.166825	0.196418	0.175919	0.163058	0.0832957	0.166478	0.095342	0.198214	0.160837	0.177752	0.157075	0.215562	0.210943	0.206582	0.225351	0.208838	0.214787	0.227187	0.219349	0.185221	0.17441	0.202698	0.198641	0.203396	0.181168	0.204453	0.208646	0.207487	0.186449	0.213951	0.215313	0.197738	0.15034	0.203606	0.201734
0.19473	0.148699	0.195161	0.190879	0.186832	0.180612	0.205954	0.178417	0.201216	0.185385	0.165797	0.0666998	0.15656	0.094976	0.203708	0.168257	0.169416	0.152006	0.202023	0.202904	0.206993	0.221223	0.210564	0.216872	0.218518	0.218401	0.200498	0.173777	0.187886	0.1885	0.199524	0.186616	0.205392	0.194527	0.212819	0.194913	0.219048	0.214866	0.18311	0.145387	0.195029	0.195199
0.191369	0.140613	0.191048	0.19135	0.191211	0.182627	0.19466	0.180101	0.205106	0.17888	0.1643	0.0824325	0.165106	0.100427	0.199445	0.161409	0.157181	0.15305	0.210018	0.208982	0.222125	0.222859	0.212822	0.210467	0.225091	0.22213	0.192263	0.173096	0.201269	0.184244	0.195131	0.188841	0.203869	0.202988	0.201646	0.192443	0.216002	0.216438	0.17566	0.141065	0.212078	0.199381
0.179474	0.14797	0.191799	0.198225	0.187865	0.179442	0.217142	0.178969	0.20882	0.177459	0.163508	0.0816905	0.169176	0.0953368	0.197269	0.161625	0.166972	0.14572	0.205487	0.204222	0.214662	0.216245	0.211363	0.20795	0.224099	0.218146	0.198798	0.178265	0.199692	0.198255	0.202323	0.17533	0.207178	0.202173	0.205792	0.202086	0.215712	0.222422	0.180486	0.136846	0.198443	0.201304
0.194839	0.128049	0.195516	0.192367	0.201759	0.180814	0.205028	0.178249	0.201136	0.184755	0.158175	0.0705193	0.173445	0.0875959	0.196155	0.164662	0.168569	0.151678	0.21269	0.195075	0.21026	0.230304	0.2163	0.217612	0.220882	0.227144	0.202907	0.167366	0.195236	0.183803	0.205154	0.183924	0.200966	0.197138	0.20775	0.193485	0.222196	0.211475	0.19293	0.146037	0.21239	0.203177
0.199941	0.141659	0.191863	0.204191	0.187398	0.169967	0.199128	0.167894	0.201532	0.186987	0.153677	0.0729546	0.157135	0.0973794	0.203771	0.167764	0.172141	0.149629	0.20362	0.198225	0.211701	0.230812	0.209897	0.218186	0.226179	0.225763	0.189333	0.189876	0.200039	0.18106	0.201588	0.176195	0.21124	0.194861	0.201859	0.186871	0.219312	0.215182	0.191418	0.145943	0.207521	0.199515
0.186285	0.145746	0.193738	0.192913	0.181934	0.187403	0.199132	0.176404	0.210572	0.178049	0.17399	0.0689466	0.17245	0.0777585	0.209288	0.163919	0.170094	0.139041	0.2127	0.197686	0.209258	0.222353	0.215313	0.211263	0.231021	0.217467	0.195112	0.178404	0.201894	0.188101	0.197724	0.186089	0.198871	0.208797	0.199262	0.209632	0.224603	0.214698	0.193244	0.135747	0.207671	0.20245
0.194932	0.137076	0.178337	0.185531	0.201605	0.172279	0.205682	0.183925	0.200825	0.187831	0.153336	0.0706063	0.164539	0.0940667	0.187735	0.166335	0.169477	0.140626	0.215755	0.200338	0.212086	0.215746	0.214391	0.208342	0.217164	0.228981	0.195817	0.174184	0.198531	0.186591	0.2011	0.180988	0.208286	0.20745	0.213406	0.189628	0.214809	0.210869	0.192999	0.150058	0.20566	0.198545
0.194476	0.140527	0.193198	0.184602	0.200676	0.17353	0.206768	0.17862	0.196251	0.182626	0.154132	0.0797063	0.166964	0.104669	0.194287	0.153024	0.177562	0.144823	0.211059	0.195596	0.202758	0.217679	0.208916	0.211413	0.231163	0.225037	0.190058	0.190495	0.187308	0.174613	0.19422	0.183174	0.205627	0.201062	0.217688	0.186355	0.213031	0.215017	0.197111	0.140738	0.206378	0.200716
0.196633	0.134665	0.188495	0.189868	0.210401	0.164944	0.210544	0.181242	0.200825	0.180444	0.165054	0.0796803	0.169614	0.0976107	0.196092	0.16415	0.162593	0.150703	0.208041	0.208605	0.201795	0.222567	0.22025	0.213617	0.220473	0.225845	0.195399	0.187797	0.19258	0.188935	0.200868	0.183535	0.205174	0.206635	0.206203	0.201857	0.214473	0.213006	0.201034	0.153171	0.201772	0.198768
0.200409	0.140765	0.18852	0.183974	0.196977	0.176662	0.204066	0.173238	0.19251	0.176419	0.146821	0.0867297	0.167786	0.0937525	0.192534	0.161412	0.175765	0.152169	0.208705	0.207988	0.215411	0.222467	0.220234	0.218161	0.215799	0.226047	0.199105	0.1759	0.198736	0.189998	0.200657	0.187026	0.203189	0.20538	0.211813	0.192609	0.211997	0.223647	0.194608	0.129868	0.203914	0.205014
0.189181	0.137505	0.194164	0.182918	0.199908	0.173549	0.199733	0.170493	0.193359	0.180424	0.160035	0.0695277	0.167468	0.090931	0.202568	0.169415	0.16448	0.150475	0.210086	0.206211	0.213144	0.222305	0.21417	0.216939	0.206144	0.21845	0.19483	0.182155	0.186964	0.191059	0.200319	0.177259	0.19775	0.20823	0.206179	0.1957	0.235615	0.216219	0.192478	0.129182	0.214114	0.196927
0.200434	0.133563	0.193173	0.194401	0.198791	0.172046	0.201506	0.173935	0.199229	0.195898	0.143564	0.0813919	0.164823	0.0918021	0.197462	0.161351	0.178359	0.143536	0.220203	0.202629	0.205607	0.213744	0.205291	0.217685	0.210382	0.219364	0.188603	0.179848	0.19406	0.19176	0.200135	0.177818	0.204963	0.195462	0.211213	0.193074	0.215768	0.222296	0.204808	0.149045	0.204202	0.194363
0.195579	0.140702	0.190647	0.182662	0.187353	0.172876	0.204536	0.180166	0.194757	0.178588	0.167885	0.0789674	0.168755	0.103816	0.187757	0.157275	0.174057	0.148528	0.210876	0.210966	0.219567	0.226776	0.222479	0.21042	0.222518	0.225093	0.194469	0.189749	0.192144	0.195839	0.197061	0.187308	0.208259	0.194465	0.215731	0.193609	0.211916	0.223062	0.190491	0.155688	0.212881	0.198155
0.195182	0.143472	0.206329	0.194193	0.189208	0.17671	0.199957	0.182643	0.199127	0.181917	0.152978	0.080481	0.17137	0.101059	0.195514	0.167652	0.171741	0.138145	0.208008	0.209647	0.213777	0.229209	0.209659	0.21536	0.224007	0.219983	0.204307	0.166006	0.190111	0.197759	0.200773	0.182658	0.20631	0.205676	0.205366	0.206792	0.209125	0.226196	0.194763	0.14005	0.196029	0.201858
0.196829	0.13754	0.193995	0.194885	0.194706	0.173152	0.198754	0.183122	0.192625	0.178043	0.167046	0.0721564	0.164152	0.104965	0.201093	0.16655	0.173117	0.146857	0.21927	0.210145	0.20226	0.227135	0.213123	0.212011	0.221806	0.229794	0.199605	0.183811	0.186937	0.191763	0.192005	0.185189	0.19935	0.206159	0.207456	0.202476	0.225349	0.216406	0.193105	0.141468	0.206495	0.201002
0.194503	0.135481	0.186976	0.193779	0.189365	0.18175	0.209617	0.188344	0.195223	0.180257	0.161579	0.0797634	0.166013	0.104341	0.19675	0.169308	0.157028	0.139187	0.195077	0.213601	0.208564	0.233881	0.214925	0.205067	0.213168	0.21865	0.199648	0.17895	0.183814	0.191364	0.208914	0.183043	0.213641	0.212655	0.209872	0.195978	0.224619	0.229676	0.19138	0.140892	0.206167	0.200367
0.189066	0.133608	0.176904	0.186696	0.198947	0.179141	0.206546	0.185024	0.19497	0.184154	0.15874	0.0736502	0.162613	0.0891719	0.202805	0.149467	0.168924	0.144633	0.208764	0.209799	0.213428	0.223512	0.212965	0.210153	0.218644	0.213756	0.197535	0.171339	0.191644	0.185553	0.196959	0.176134	0.204133	0.200907	0.210839	0.201356	0.221564	0.22005	0.195384	0.140842	0.206287	0.200589
0.198326	0.148628	0.190525	0.177927	0.198331	0.172306	0.202311	0.169991	0.192171	0.184654	0.160836	0.0729358	0.155772	0.0944667	0.210158	0.169283	0.16812	0.158574	0.216885	0.21055	0.220089	0.221958	0.212479	0.207798	0.220748	0.224457	0.186183	0.175439	0.196338	0.186858	0.202781	0.174401	0.197153	0.183736	0.204603	0.201077	0.219682	0.214786	0.186766	0.134844	0.202621	0.208039
0.202231	0.144247	0.193827	0.196252	0.195727	0.174486	0.209833	0.172784	0.189079	0.190562	0.162828	0.0677499	0.158559	0.102286	0.189936	0.167127	0.166335	0.145745	0.215354	0.213781	0.206831	0.222428	0.212796	0.208415	0.228042	0.216744	0.198369	0.175086	0.192112	0.193836	0.194828	0.188982	0.202146	0.197684	0.204004	0.198162	0.220007	0.223639	0.197192	0.152055	0.20392	0.204274
0.18586	0.12842	0.207798	0.19916	0.193479	0.164667	0.200806	0.175866	0.202643	0.18978	0.16318	0.0660167	0.170428	0.0925995	0.204832	0.156353	0.173846	0.138464	0.211908	0.212922	0.214245	0.22911	0.205972	0.217269	0.205571	0.228481	0.191718	0.173348	0.190988	0.187484	0.203931	0.177728	0.19763	0.206268	0.218451	0.195918	0.213894	0.209434	0.193662	0.1405	0.218885	0.200237
0.197976	0.136964	0.180875	0.187841	0.206685	0.18183	0.204159	0.177794	0.21119	0.182676	0.161148	0.0761836	0.167765	0.0912596	0.199043	0.158268	0.174657	0.151084	0.204174	0.201401	0.204214	0.222649	0.204072	0.209322	0.21981	0.221208	0.191842	0.177314	0.187381	0.18514	0.193077	0.169135	0.197687	0.202554	0.208514	0.190993	0.219487	0.22147	0.174962	0.1466	0.209326	0.202844
0.205634	0.146877	0.201816	0.18033	0.193463	0.178225	0.203448	0.183254	0.194461	0.190105	0.158488	0.0879758	0.161173	0.097415	0.199882	0.156487	0.17375	0.142305	0.210346	0.197628	0.214392	0.21466	0.214511	0.210407	0.218377	0.222424	0.187346	0.186131	0.194134	0.19357	0.193961	0.182811	0.197582	0.206444	0.205122	0.193287	0.221347	0.221839	0.198402	0.146823	0.210309	0.186276
0.198346	0.13197	0.179527	0.182497	0.189136	0.169383	0.213176	0.171348	0.194097	0.177009	0.163629	0.083937	0.169298	0.0865145	0.205984	0.159684	0.175961	0.147897	0.213784	0.214249	0.211505	0.223218	0.203402	0.220127	0.222969	0.224526	0.193938	0.180688	0.194414	0.182476	0.197406	0.179933	0.207877	0.194609	0.209986	0.19791	0.218111	0.212791	0.185402	0.142249	0.200451	0.205704
0.192581	0.14895	0.194011	0.194254	0.194114	0.174949	0.194349	0.185784	0.199057	0.18539	0.163707	0.073978	0.1609	0.0940907	0.199934	0.164691	0.171967	0.145391	0.19662	0.200915	0.224967	0.228411	0.215301	0.219945	0.219079	0.228443	0.189896	0.182515	0.186572	0.194631	0.20002	0.185339	0.195573	0.193079	0.211665	0.199816	0.219609	0.219905	0.189896	0.154299	0.204598	0.204403
0.184211	0.150312	0.195041	0.196711	0.181636	0.180893	0.200355	0.16552	0.193373	0.18256	0.161151	0.0662344	0.162138	0.102426	0.19182	0.156542	0.178653	0.162735	0.217049	0.206834	0.215701	0.22271	0.208003	0.218535	0.224851	0.221133	0.188612	0.184292	0.188185	0.174769	0.190064	0.183334	0.205812	0.202035	0.203602	0.196261	0.21664	0.217417	0.180688	0.145827	0.2044	0.211238
0.198718	0.130427	0.199749	0.191853	0.180883	0.185375	0.208989	0.173669	0.203009	0.181327	0.153381	0.0587749	0.151756	0.107121	0.19977	0.174105	0.169331	0.141148	0.207656	0.197809	0.208931	0.217287	0.213955	0.222157	0.2269	0.22873	0.200406	0.174937	0.184481	0.19524	0.196648	0.175215	0.195375	0.206289	0.211793	0.209495	0.213368	0.22102	0.184496	0.145321	0.204878	0.200403
0.188778	0.146164	0.196636	0.185409	0.207101	0.175212	0.202461	0.168957	0.188546	0.18661	0.15268	0.0709866	0.165919	0.094786	0.20554	0.157952	0.177234	0.152326	0.213666	0.209549	0.214934	0.222432	0.210561	0.213851	0.218565	0.223378	0.19136	0.1837	0.189852	0.191406	0.194017	0.192618	0.213482	0.203426	0.208594	0.202342	0.225258	0.211429	0.196237	0.142192	0.212036	0.196986
0.191488	0.137212	0.195687	0.188714	0.189914	0.182885	0.212081	0.177053	0.195242	0.181974	0.168023	0.0722466	0.159354	0.0896828	0.202989	0.169299	0.169799	0.160434	0.214949	0.196028	0.222474	0.230354	0.212655	0.210473	0.215583	0.209368	0.198289	0.179316	0.186641	0.188426	0.188811	0.17251	0.197035	0.20029	0.203801	0.197055	0.218338	0.214462	0.188573	0.141423	0.210905	0.198434
0.197112	0.14079	0.185781	0.19849	0.204365	0.182014	0.197276	0.180698	0.200939	0.181946	0.164557	0.0787949	0.166992	0.0972322	0.192933	0.158505	0.165664	0.147615	0.212984	0.207122	0.213808	0.220688	0.214551	0.211798	0.221074	0.219245	0.195354	0.169283	0.198623	0.193611	0.18728	0.177781	0.211721	0.19051	0.20792	0.200628	0.223705	0.229718	0.197727	0.146258	0.204706	0.200362
0.184347	0.145825	0.200204	0.184355	0.195806	0.185853	0.211187	0.182444	0.189846	0.186991	0.155563	0.0695697	0.16689	0.109357	0.194456	0.167741	0.170109	0.161876	0.216338	0.203256	0.212779	0.223869	0.214352	0.2157	0.212584	0.228616	0.18946	0.172299	0.192484	0.192055	0.204264	0.18001	0.212809	0.201824	0.197175	0.196992	0.21562	0.214891	0.191257	0.144683	0.204909	0.186747
0.195521	0.142838	0.192076	0.188282	0.197959	0.171433	0.210395	0.174283	0.202032	0.190262	0.157764	0.0612364	0.164069	0.102381	0.196324	0.174895	0.165403	0.15115	0.208968	0.205807	0.207734	0.221927	0.206555	0.217847	0.21678	0.22798	0.193816	0.170616	0.189791	0.196952	0.198532	0.174033	0.210063	0.204061	0.206771	0.196556	0.22336	0.220886	0.192112	0.15907	0.200303	0.204276
0.191694	0.136173	0.186696	0.189881	0.190395	0.173027	0.208435	0.182473	0.188334	0.172468	0.16015	0.080379	0.163981	0.0952551	0.195841	0.165368	0.179329	0.154968	0.207273	0.2084	0.219484	0.226566	0.201194	0.218704	0.209905	0.219438	0.18538	0.173972	0.190541	0.203206	0.194764	0.191662	0.20507	0.215987	0.200238	0.19106	0.217862	0.206591	0.184376	0.137741	0.20056	0.201982
0.212325	0.134902	0.191001	0.194726	0.194767	0.180038	0.198544	0.181563	0.204649	0.180043	0.160367	0.0690502	0.174058	0.102758	0.189181	0.16538	0.168704	0.145846	0.210702	0.207835	0.219396	0.226641	0.214544	0.206972	0.219553	0.217214	0.193419	0.175724	0.196502	0.194356	0.194748	0.177191	0.202888	0.194193	0.207928	0.206892	0.208181	0.217513	0.195109	0.151491	0.218726	0.202047
0.195327	0.14835	0.18623	0.198017	0.193091	0.182421	0.194831	0.170591	0.201589	0.180247	0.153735	0.0793718	0.162129	0.0885347	0.195535	0.166061	0.17336	0.145692	0.204801	0.217266	0.213752	0.22138	0.212813	0.213351	0.212381	0.216207	0.189642	0.173151	0.193484	0.196856	0.207506	0.176991	0.211201	0.19728	0.204699	0.191886	0.219225	0.217034	0.197852	0.152023	0.206011	0.191741
0.200368	0.139094	0.201698	0.189237	0.198334	0.173081	0.209842	0.172302	0.197492	0.184782	0.164912	0.0657738	0.169449	0.10245	0.195599	0.169188	0.172171	0.140036	0.202139	0.209509	0.209825	0.222651	0.207115	0.204916	0.225704	0.219372	0.181048	0.181533	0.194389	0.17852	0.197968	0.178705	0.196628	0.197634	0.205822	0.1973	0.21784	0.222943	0.19229	0.143593	0.202042	0.208199
0.205424	0.138538	0.188221	0.19116	0.192276	0.166983	0.202186	0.175803	0.205956	0.194542	0.18053	0.0709984	0.170358	0.0999004	0.199046	0.153743	0.162575	0.152186	0.198451	0.198377	0.200068	0.231491	0.20283	0.217335	0.21573	0.217057	0.198296	0.178024	0.198391	0.19735	0.202619	0.187599	0.200916	0.207651	0.220195	0.199445	0.212959	0.213056	0.186881	0.152972	0.197218	0.213406
0.195366	0.130578	0.193016	0.184885	0.200621	0.171602	0.211446	0.192626	0.189779	0.18677	0.16098	0.0749135	0.166633	0.101192	0.191363	0.169559	0.182715	0.155032	0.213333	0.213362	0.218039	0.223983	0.203655	0.210153	0.226076	0.220919	0.194517	0.175645	0.193121	0.182302	0.206254	0.186458	0.216371	0.205168	0.211623	0.200449	0.224388	0.224431	0.17758	0.13938	0.206639	0.190838
0.196277	0.136667	0.194387	0.183211	0.188178	0.167182	0.20451	0.182434	0.192766	0.190867	0.165928	0.0720602	0.165068	0.0935934	0.200861	0.156332	0.175834	0.143853	0.211242	0.200195	0.209044	0.219881	0.217102	0.215824	0.217897	0.244585	0.193932	0.181845	0.189267	0.190775	0.202538	0.191149	0.202685	0.203424	0.201767	0.203346	0.22127	0.214424	0.189936	0.156021	0.202399	0.191504
0.190444	0.140185	0.18966	0.186635	0.205851	0.17066	0.206	0.174227	0.193939	0.182245	0.15271	0.0848618	0.165664	0.10023	0.205054	0.154693	0.175257	0.147132	0.200035	0.209908	0.216198	0.212473	0.214685	0.20932	0.221679	0.219732	0.184929	0.189276	0.192576	0.179047	0.196337	0.183675	0.204834	0.200283	0.21071	0.196379	0.229561	0.220709	0.184527	0.149258	0.207802	0.201267
0.198085	0.143059	0.1953	0.196993	0.192734	0.1796	0.195008	0.169648	0.188236	0.180719	0.167323	0.068901	0.157611	0.0955887	0.205604	0.162266	0.177982	0.141266	0.214949	0.201646	0.208184	0.227264	0.222155	0.211397	0.219056	0.22348	0.19498	0.184759	0.18354	0.19105	0.197455	0.183739	0.20823	0.206651	0.208024	0.203117	0.222363	0.22091	0.201028	0.15063	0.207135	0.202397
0.194013	0.141226	0.182601	0.191959	0.188174	0.171277	0.204282	0.175763	0.187215	0.187045	0.167978	0.0760348	0.147449	0.0964867	0.20057	0.153382	0.17607	0.143905	0.211373	0.201122	0.206881	0.217495	0.209297	0.220953	0.205259	0.227056	0.196851	0.181331	0.195887	0.195065	0.190541	0.169342	0.20223	0.202573	0.210079	0.197725	0.219264	0.220111	0.194272	0.136852	0.199187	0.208649
0.195949	0.138705	0.192211	0.190767	0.202349	0.171345	0.21383	0.178508	0.197144	0.186278	0.157523	0.0737517	0.154722	0.0954555	0.1925	0.173697	0.177506	0.146984	0.210674	0.189605	0.211942	0.223252	0.214939	0.203689	0.211816	0.226945	0.199742	0.192262	0.192323	0.18606	0.201253	0.182807	0.195647	0.191411	0.204378	0.19788	0.222404	0.223578	0.188758	0.151125	0.20903	0.205151
0.196246	0.144606	0.191692	0.182953	0.200304	0.169739	0.207918	0.182368	0.197392	0.183804	0.158017	0.069629	0.161678	0.0966991	0.201304	0.159779	0.161725	0.150875	0.209027	0.205898	0.207717	0.22309	0.21196	0.216034	0.220605	0.218064	0.187033	0.17295	0.1989	0.197092	0.191856	0.183115	0.201074	0.201929	0.210381	0.20004	0.22883	0.225406	0.188317	0.146034	0.203003	0.19987
0.208739	0.138658	0.200202	0.1887	0.190669	0.171705	0.213487	0.171749	0.205871	0.17829	0.164382	0.0751184	0.154696	0.10684	0.198753	0.162081	0.168694	0.148748	0.212354	0.20618	0.203263	0.223813	0.217182	0.210192	0.227883	0.220912	0.189355	0.175001	0.198509	0.184231	0.197917	0.17399	0.204545	0.193316	0.198536	0.185692	0.212815	0.214904	0.192527	0.145167	0.206443	0.197087
0.186525	0.146805	0.187036	0.18677	0.19056	0.183031	0.209373	0.176422	0.209637	0.194091	0.166604	0.0820873	0.149966	0.102327	0.199705	0.155022	0.171946	0.137812	0.212421	0.198127	0.209579	0.228086	0.209903	0.204507	0.226979	0.23027	0.196091	0.18133	0.194306	0.18794	0.19495	0.173761	0.203452	0.1997	0.212055	0.199895	0.220845	0.218482	0.193599	0.138061	0.211141	0.207493
0.196119	0.132644	0.199781	0.187965	0.201027	0.182542	0.206044	0.185468	0.207033	0.176049	0.159986	0.0770503	0.160664	0.0976297	0.19096	0.164008	0.18325	0.148883	0.20713	0.210963	0.212868	0.224383	0.210252	0.214679	0.220067	0.225691	0.193243	0.175156	0.189596	0.194018	0.198597	0.192784	0.205795	0.211129	0.213497	0.204359	0.219793	0.216126	0.189647	0.14182	0.19422	0.214092
0.196742	0.141613	0.192766	0.190513	0.193106	0.171575	0.195664	0.186037	0.191763	0.175545	0.168938	0.0732476	0.17483	0.0883256	0.202143	0.161969	0.174514	0.143005	0.208171	0.200059	0.221465	0.215494	0.217704	0.215742	0.224691	0.221266	0.196198	0.182695	0.191888	0.189591	0.202635	0.181543	0.20199	0.194012	0.205525	0.189785	0.21154	0.216944	0.203034	0.147505	0.206018	0.199279
0.185933	0.13667	0.186832	0.179135	0.196498	0.169846	0.201818	0.174195	0.206315	0.187735	0.156215	0.075412	0.158464	0.100026	0.193466	0.169625	0.166718	0.143467	0.215065	0.209349	0.20997	0.225139	0.207128	0.218273	0.222276	0.233606	0.183024	0.181683	0.194263	0.197739	0.196922	0.176988	0.194631	0.201568	0.21421	0.193719	0.218885	0.221253	0.192336	0.150399	0.200533	0.204367
0.193447	0.13438	0.194162	0.175288	0.195162	0.180967	0.203715	0.1777	0.199254	0.18403	0.160934	0.0778237	0.164252	0.102214	0.196594	0.16208	0.176164	0.145515	0.212432	0.20845	0.22239	0.222142	0.21287	0.217715	0.220815	0.237184	0.199379	0.167143	0.182403	0.186675	0.198427	0.176084	0.204222	0.200657	0.21407	0.196373	0.231753	0.216372	0.186651	0.134912	0.198192	0.199943
0.190569	0.137975	0.194747	0.182708	0.192486	0.179096	0.202428	0.170994	0.20593	0.188725	0.157037	0.0803666	0.167788	0.0959483	0.195563	0.17491	0.167954	0.144516	0.221255	0.197962	0.215571	0.223817	0.216137	0.208992	0.220836	0.21681	0.185506	0.176567	0.194634	0.2032	0.197981	0.174003	0.210013	0.211191	0.198829	0.186608	0.214067	0.225046	0.187952	0.146304	0.208257	0.201511
0.191853	0.144705	0.19137	0.186079	0.20207	0.182545	0.212498	0.188855	0.198782	0.191566	0.159928	0.078894	0.161364	0.1023	0.203107	0.168589	0.18148	0.143255	0.212262	0.21354	0.212209	0.214196	0.224339	0.220382	0.212554	0.227142	0.197387	0.173927	0.192703	0.203389	0.194125	0.174931	0.208449	0.182686	0.202578	0.199173	0.220399	0.218383	0.18877	0.142918	0.206271	0.20629
0.18965	0.131189	0.196641	0.189804	0.20078	0.170931	0.200458	0.170252	0.2038	0.191481	0.1565	0.0833205	0.162979	0.100522	0.201515	0.167109	0.168705	0.147025	0.212839	0.211321	0.214306	0.222705	0.224098	0.204478	0.217193	0.224564	0.190858	0.167692	0.193724	0.193559	0.19578	0.182548	0.199554	0.206906	0.207569	0.198446	0.23528	0.208614	0.185682	0.135015	0.214284	0.212539
0.202181	0.150037	0.190776	0.185455	0.196476	0.173273	0.20147	0.178115	0.200119	0.190187	0.15412	0.0703543	0.156506	0.108395	0.188612	0.166978	0.172938	0.165207	0.209617	0.200533	0.211217	0.218249	0.214148	0.212989	0.219293	0.22441	0.193658	0.182283	0.192204	0.182822	0.196884	0.174245	0.200836	0.208043	0.209591	0.199898	0.217963	0.220588	0.19893	0.136413	0.19564	0.204793
0.19329	0.139641	0.196474	0.199547	0.194872	0.182679	0.2029	0.177965	0.195718	0.185684	0.166522	0.0704336	0.162191	0.0999555	0.194702	0.159253	0.17351	0.151736	0.212696	0.205994	0.21188	0.228378	0.208848	0.212006	0.217832	0.230503	0.198969	0.170546	0.20055	0.195694	0.195434	0.179164	0.206909	0.209261	0.213596	0.196409	0.218463	0.220592	0.187355	0.142505	0.207661	0.19445
0.186646	0.142747	0.196418	0.176939	0.190358	0.171819	0.206351	0.168184	0.196316	0.176527	0.164188	0.0734994	0.167138	0.100158	0.197841	0.166896	0.162238	0.154703	0.217073	0.209523	0.215245	0.223774	0.21456	0.211083	0.224424	0.219959	0.193086	0.174939	0.194749	0.184442	0.204871	0.180637	0.202973	0.213984	0.225331	0.197936	0.216396	0.225648	0.194133	0.143099	0.197967	0.20148
0.195048	0.129101	0.187534	0.186443	0.199803	0.183799	0.197633	0.185043	0.196333	0.190122	0.154388	0.0767796	0.171876	0.10231	0.196939	0.154268	0.160888	0.145332	0.212628	0.207772	0.21442	0.234963	0.198157	0.217503	0.218884	0.220873	0.197146	0.178879	0.186371	0.188713	0.198556	0.181674	0.198389	0.19822	0.200772	0.205039	0.231567	0.228369	0.197401	0.140141	0.197966	0.208311
0.203298	0.136215	0.192388	0.19257	0.193746	0.17972	0.206052	0.17359	0.195148	0.160643	0.174931	0.0708793	0.167071	0.0967172	0.189339	0.160431	0.171101	0.150148	0.212437	0.209096	0.208717	0.232369	0.20347	0.208515	0.216467	0.215044	0.19423	0.183885	0.187708	0.193701	0.194259	0.177145	0.19842	0.193393	0.210718	0.194529	0.216271	0.213177	0.195305	0.141751	0.192918	0.199512
0.195477	0.148031	0.196473	0.190864	0.202901	0.173082	0.209398	0.176153	0.190087	0.181995	0.147607	0.0777371	0.161131	0.0891354	0.191683	0.166886	0.169623	0.144258	0.223467	0.213427	0.215863	0.225897	0.203398	0.227044	0.22577	0.222071	0.188381	0.184629	0.201391	0.195204	0.194356	0.180957	0.201207	0.207627	0.218233	0.204048	0.214779	0.208416	0.190247	0.149686	0.209152	0.204347
0.206382	0.145528	0.182292	0.179834	0.193408	0.175185	0.208371	0.185914	0.195267	0.179046	0.167584	0.0728917	0.157882	0.0922057	0.202935	0.169884	0.17025	0.138573	0.209112	0.210394	0.215816	0.227413	0.212719	0.219943	0.214744	0.216715	0.201339	0.180025	0.192463	0.188528	0.206455	0.190983	0.199786	0.202928	0.207714	0.210833	0.216511	0.216672	0.188364	0.152171	0.202631	0.205451
0.202902	0.134441	0.196902	0.195658	0.1873	0.180274	0.195326	0.168765	0.196826	0.188434	0.163225	0.0727333	0.167274	0.0995196	0.20161	0.168634	0.176967	0.146715	0.207898	0.208975	0.203662	0.220536	0.210468	0.220603	0.200759	0.223069	0.193731	0.174553	0.193386	0.184283	0.198576	0.181607	0.195665	0.204271	0.213538	0.20355	0.225372	0.221948	0.191828	0.142087	0.211289	0.197384
0.196777	0.147562	0.190492	0.184997	0.198816	0.183622	0.201811	0.177952	0.189981	0.178972	0.154798	0.0824902	0.161549	0.0846995	0.20248	0.169498	0.169505	0.149736	0.213102	0.209965	0.211724	0.223033	0.21243	0.204207	0.219418	0.222048	0.184824	0.18426	0.198067	0.194621	0.203264	0.179123	0.210546	0.203938	0.203621	0.19426	0.215917	0.211876	0.191507	0.14889	0.199864	0.205073
0.187673	0.144947	0.201396	0.194182	0.195303	0.171154	0.206034	0.193292	0.194899	0.180546	0.172337	0.0790203	0.166482	0.0919399	0.202933	0.161092	0.182669	0.145538	0.211608	0.208393	0.219267	0.227734	0.206564	0.209635	0.214139	0.216021	0.193968	0.182022	0.188749	0.18357	0.199142	0.181663	0.210987	0.205049	0.205253	0.196698	0.218408	0.224101	0.192061	0.14207	0.19548	0.209129
0.19282	0.141596	0.190719	0.194271	0.199926	0.186263	0.209177	0.176801	0.196444	0.188907	0.16321	0.0798131	0.167602	0.103474	0.197016	0.16096	0.181894	0.152206	0.202857	0.205741	0.214095	0.228523	0.209613	0.230562	0.226747	0.21338	0.177198	0.187365	0.196252	0.194875	0.19673	0.180309	0.197632	0.199877	0.214714	0.1931	0.217111	0.215512	0.206905	0.148362	0.214742	0.203643
0.1944	0.134927	0.188583	0.190639	0.193188	0.171898	0.212346	0.184486	0.192039	0.183995	0.168967	0.0828029	0.159639	0.100307	0.201566	0.159668	0.168571	0.140275	0.212294	0.21333	0.207679	0.220279	0.209527	0.215926	0.217587	0.218569	0.181537	0.174771	0.194276	0.184726	0.192815	0.190158	0.201684	0.200152	0.205038	0.189943	0.226276	0.22486	0.192956	0.140652	0.207178	0.203037
0.194986	0.136212	0.188033	0.191553	0.192924	0.185617	0.198583	0.18813	0.191299	0.186962	0.167143	0.0760439	0.170988	0.107297	0.19817	0.175729	0.173804	0.142657	0.213306	0.200266	0.20869	0.226209	0.203267	0.213634	0.221918	0.226188	0.188353	0.180768	0.192436	0.192516	0.194529	0.174565	0.201162	0.198477	0.197125	0.196288	0.215879	0.210342	0.19607	0.135156	0.192733	0.201435
0.189331	0.144585	0.190277	0.184976	0.207823	0.162319	0.204958	0.18765	0.195778	0.184156	0.16306	0.0841132	0.164496	0.0977013	0.200941	0.169569	0.164716	0.147017	0.211135	0.198936	0.208297	0.223508	0.211713	0.208661	0.214516	0.215703	0.189677	0.177708	0.183618	0.177104	0.198856	0.175273	0.202466	0.210512	0.218572	0.2045	0.220798	0.219242	0.186481	0.139694	0.19539	0.198182
0.201332	0.14274	0.187892	0.188883	0.201341	0.173428	0.194427	0.17273	0.20091	0.177342	0.159516	0.0798529	0.165792	0.0994356	0.202866	0.161086	0.171036	0.142242	0.210469	0.205385	0.204552	0.221312	0.21264	0.206286	0.225007	0.214409	0.196317	0.168469	0.193513	0.195855	0.192041	0.182299	0.206903	0.199042	0.200741	0.195017	0.219703	0.218448	0.187614	0.149225	0.188414	0.196939
0.209643	0.137387	0.192301	0.18565	0.205281	0.170218	0.203071	0.176359	0.204662	0.193503	0.157681	0.0703296	0.168954	0.088834	0.193369	0.175089	0.176378	0.145543	0.212002	0.212061	0.216401	0.228066	0.204714	0.206901	0.216616	0.225758	0.19417	0.170285	0.203314	0.199391	0.210637	0.181953	0.205692	0.202805	0.206186	0.202888	0.216084	0.220179	0.189493	0.144773	0.202822	0.21045
0.196794	0.143685	0.189801	0.19634	0.186621	0.160956	0.196359	0.181901	0.207188	0.186535	0.167248	0.0804532	0.16558	0.0965951	0.196683	0.165629	0.165371	0.149961	0.225412	0.201219	0.217684	0.215322	0.224748	0.21315	0.218903	0.225776	0.180808	0.18772	0.193474	0.18717	0.205049	0.181313	0.200838	0.202961	0.196892	0.197441	0.218562	0.223862	0.19506	0.150599	0.212879	0.199891
0.199839	0.135723	0.193494	0.191427	0.196593	0.164598	0.215508	0.169836	0.193295	0.172309	0.154471	0.0852285	0.167951	0.0941608	0.188821	0.170372	0.176639	0.153011	0.220394	0.201445	0.20835	0.228566	0.222633	0.206881	0.224692	0.226961	0.185077	0.185058	0.198582	0.194771	0.195713	0.173381	0.197859	0.204701	0.197899	0.200263	0.220149	0.224233	0.196384	0.135906	0.202655	0.204433
0.207409	0.13609	0.195652	0.177584	0.198175	0.179591	0.202854	0.182849	0.202067	0.194384	0.152927	0.0777003	0.168119	0.103066	0.194861	0.177117	0.174286	0.148458	0.216466	0.209183	0.219175	0.224148	0.217432	0.216889	0.21651	0.229608	0.201453	0.182225	0.194167	0.190674	0.194851	0.182167	0.195588	0.2038	0.206388	0.195019	0.216302	0.222159	0.199862	0.150658	0.201175	0.203349
0.187225	0.132524	0.198817	0.185499	0.191323	0.16895	0.204306	0.172334	0.202856	0.178282	0.164493	0.0715091	0.160802	0.10225	0.202117	0.162206	0.175514	0.151531	0.20708	0.205017	0.20755	0.226118	0.216997	0.208187	0.214903	0.231302	0.198329	0.188273	0.199802	0.187112	0.187241	0.182481	0.198732	0.207273	0.205938	0.195183	0.217463	0.219072	0.194739	0.142964	0.205924	0.198268
0.205532	0.141844	0.190537	0.186453	0.195519	0.174939	0.202109	0.185245	0.193708	0.173049	0.152504	0.0780002	0.164731	0.0963795	0.199784	0.169023	0.177838	0.158055	0.213393	0.202329	0.214709	0.230845	0.20012	0.216698	0.221014	0.220311	0.188314	0.184238	0.188477	0.186165	0.195878	0.17371	0.197679	0.205808	0.214156	0.196424	0.22017	0.213621	0.197783	0.147107	0.199918	0.205235
0.204342	0.134444	0.200728	0.184858	0.194388	0.171141	0.202298	0.180885	0.191974	0.183882	0.160577	0.0765712	0.162227	0.0929448	0.20072	0.159524	0.175538	0.153044	0.20154	0.201264	0.205845	0.233203	0.208304	0.210096	0.218893	0.21673	0.188929	0.19155	0.192429	0.183604	0.193597	0.181347	0.203568	0.194085	0.206596	0.194305	0.20819	0.221406	0.194361	0.153177	0.201775	0.198005
0.186949	0.135507	0.193841	0.189853	0.18734	0.179754	0.204732	0.182129	0.193151	0.18469	0.163662	0.0840137	0.155015	0.0933342	0.192423	0.175389	0.173857	0.140125	0.210059	0.200548	0.21535	0.224018	0.207604	0.216928	0.220709	0.215973	0.191256	0.181849	0.189999	0.198707	0.196909	0.183618	0.20755	0.198681	0.20115	0.196808	0.219514	0.212506	0.186721	0.140552	0.202297	0.200139
0.199989	0.144256	0.196356	0.187959	0.188189	0.182266	0.19314	0.183274	0.186975	0.184788	0.153864	0.0848426	0.15767	0.0993006	0.198964	0.158233	0.172625	0.140115	0.213216	0.202009	0.210065	0.223329	0.22539	0.215522	0.223847	0.235873	0.195128	0.184199	0.188954	0.184504	0.207242	0.186805	0.201818	0.194235	0.207206	0.199365	0.205431	0.213062	0.200155	0.138589	0.201044	0.204222
0.188319	0.13388	0.192597	0.18636	0.189449	0.17009	0.208256	0.17965	0.187962	0.191182	0.149284	0.0644199	0.162826	0.100662	0.195061	0.156225	0.17784	0.145768	0.210021	0.194335	0.208012	0.219804	0.214068	0.211041	0.225431	0.230452	0.183999	0.180861	0.199665	0.186273	0.201793	0.17818	0.20268	0.19058	0.216178	0.204564	0.226671	0.221341	0.185323	0.14669	0.208795	0.200902
0.207985	0.139217	0.19124	0.188604	0.191689	0.177681	0.21348	0.181104	0.202561	0.184623	0.164226	0.0879294	0.160381	0.100651	0.201496	0.154993	0.183684	0.155505	0.215122	0.199667	0.221506	0.217709	0.21438	0.216051	0.232854	0.231394	0.196136	0.180375	0.205152	0.1869	0.199982	0.179719	0.197165	0.195132	0.20994	0.195251	0.218798	0.203873	0.189678	0.139483	0.211181	0.211538
0.199327	0.141465	0.188021	0.182001	0.200848	0.185867	0.206561	0.172196	0.186086	0.186339	0.151513	0.0745093	0.168008	0.0929656	0.201332	0.158989	0.171463	0.155067	0.206021	0.204686	0.215846	0.222484	0.212687	0.199925	0.216916	0.231167	0.197126	0.172913	0.197554	0.186908	0.193712	0.184288	0.205543	0.201329	0.205282	0.202303	0.216096	0.220492	0.192056	0.156474	0.207908	0.207257
0.191006	0.14151	0.186422	0.186882	0.197146	0.174569	0.196968	0.162596	0.203633	0.186797	0.177375	0.0713545	0.165275	0.103321	0.189132	0.162355	0.167574	0.140775	0.215092	0.200978	0.21132	0.226273	0.199012	0.218491	0.203665	0.218238	0.197712	0.18208	0.185199	0.186634	0.197043	0.183573	0.193378	0.199298	0.200017	0.210216	0.214113	0.214554	0.198841	0.149502	0.203761	0.199281
0.193591	0.140759	0.196998	0.189352	0.203331	0.17524	0.209079	0.180011	0.199258	0.186372	0.167948	0.0753982	0.157477	0.10054	0.202229	0.174275	0.167291	0.143523	0.205917	0.209606	0.204473	0.227673	0.219627	0.221715	0.221567	0.231636	0.196496	0.182612	0.185789	0.184627	0.197828	0.176538	0.212052	0.211349	0.20817	0.192827	0.224306	0.220027	0.187855	0.137231	0.206598	0.203964
0.188392	0.147419	0.190982	0.181802	0.194484	0.170503	0.211287	0.174726	0.205529	0.195442	0.153158	0.0713241	0.160909	0.0923057	0.196573	0.167516	0.177805	0.1417	0.214865	0.19944	0.215864	0.219415	0.215916	0.218866	0.22605	0.227405	0.201394	0.17999	0.206225	0.191369	0.195995	0.178086	0.210894	0.187802	0.204298	0.198306	0.227911	0.213936	0.184594	0.148706	0.201055	0.196711
0.197627	0.136334	0.185824	0.195252	0.192293	0.17619	0.202058	0.179162	0.194423	0.184811	0.160745	0.0798064	0.165633	0.0914803	0.208567	0.164863	0.174613	0.144749	0.208111	0.195401	0.212425	0.229724	0.210293	0.213401	0.221583	0.225174	0.194257	0.186019	0.190692	0.190283	0.197564	0.189217	0.201677	0.206942	0.216099	0.197287	0.224296	0.215308	0.198889	0.145237	0.207714	0.205022
0.201403	0.143011	0.192877	0.19617	0.204928	0.175757	0.203924	0.175976	0.200799	0.182956	0.161204	0.0777159	0.168833	0.0979393	0.18682	0.16731	0.177011	0.149708	0.218395	0.210095	0.210949	0.225814	0.209317	0.208192	0.222694	0.226648	0.194497	0.191842	0.188571	0.191213	0.200871	0.177071	0.200131	0.199241	0.194087	0.196552	0.227914	0.212812	0.198936	0.147597	0.200744	0.210493
0.199699	0.14765	0.190746	0.186846	0.19802	0.176622	0.201193	0.180834	0.199859	0.177543	0.158466	0.0829499	0.16159	0.102391	0.199132	0.155295	0.173386	0.142604	0.201159	0.195452	0.205675	0.236521	0.22269	0.217281	0.224366	0.219064	0.190491	0.180878	0.19689	0.198171	0.197292	0.179618	0.199401	0.203961	0.211441	0.196103	0.220225	0.219628	0.19175	0.147926	0.208065	0.199572
0.198588	0.138721	0.201192	0.18556	0.189288	0.169139	0.198644	0.188779	0.200264	0.181833	0.163689	0.0644494	0.174531	0.0977405	0.205157	0.164734	0.172742	0.146587	0.201201	0.211842	0.217349	0.225928	0.220773	0.223089	0.231427	0.2257	0.197063	0.176313	0.191311	0.196198	0.196869	0.196189	0.204718	0.212884	0.210884	0.20223	0.22137	0.209533	0.195131	0.152072	0.20443	0.19514
0.207103	0.1354	0.198119	0.188858	0.195707	0.167776	0.202019	0.192058	0.20122	0.184107	0.169702	0.0822411	0.163429	0.106578	0.192154	0.16958	0.168517	0.160266	0.210383	0.21416	0.214248	0.227698	0.214884	0.219641	0.218442	0.223959	0.190196	0.177649	0.185869	0.198299	0.19263	0.183994	0.197758	0.19131	0.211233	0.194308	0.213012	0.213696	0.186707	0.147725	0.202978	0.193901
0.192803	0.137359	0.192749	0.190114	0.210823	0.17243	0.199626	0.176725	0.200625	0.181036	0.157339	0.0678451	0.153191	0.0976205	0.194619	0.156442	0.173615	0.150403	0.209939	0.202552	0.222643	0.226638	0.20287	0.210748	0.217033	0.21598	0.196562	0.176817	0.192776	0.188863	0.196929	0.18412	0.200841	0.195012	0.219331	0.20023	0.216744	0.216853	0.192819	0.140148	0.199895	0.204719
0.197797	0.149699	0.200668	0.195081	0.201047	0.17324	0.20502	0.179393	0.195934	0.176328	0.16432	0.0816469	0.156684	0.0912605	0.196779	0.156851	0.176333	0.146349	0.212377	0.210787	0.208534	0.217166	0.208419	0.207681	0.230387	0.224015	0.196773	0.183123	0.195615	0.192024	0.197489	0.177285	0.200733	0.202356	0.20737	0.1919	0.222132	0.22073	0.188431	0.13309	0.206244	0.200872
0.190705	0.135619	0.186854	0.195615	0.193906	0.184716	0.202027	0.184833	0.204762	0.188321	0.156507	0.0650977	0.156675	0.100103	0.201351	0.161667	0.174561	0.144553	0.213127	0.204865	0.220506	0.219236	0.210855	0.202346	0.213696	0.228711	0.198586	0.183099	0.190124	0.186858	0.202953	0.176743	0.20777	0.198103	0.211402	0.191735	0.222458	0.22336	0.193519	0.152628	0.20782	0.197995
0.196932	0.140553	0.180558	0.181878	0.191044	0.178544	0.210998	0.180837	0.199014	0.178707	0.161159	0.0818061	0.157319	0.0845923	0.205863	0.15997	0.171972	0.149654	0.210756	0.223684	0.209738	0.211402	0.212354	0.218489	0.223849	0.228269	0.186542	0.174403	0.197233	0.199725	0.200664	0.184022	0.206623	0.196681	0.206333	0.189277	0.223485	0.214456	0.194763	0.134592	0.197027	0.193663
0.203434	0.144966	0.193921	0.192364	0.193264	0.186792	0.200488	0.1752	0.196367	0.185149	0.173509	0.0721652	0.159503	0.105384	0.195547	0.152455	0.165611	0.150073	0.212668	0.211645	0.216277	0.227911	0.220575	0.213905	0.214573	0.22603	0.190999	0.188055	0.192836	0.197227	0.200852	0.177147	0.193735	0.200056	0.203484	0.193475	0.218682	0.219271	0.188684	0.13542	0.203248	0.204513
0.201564	0.128244	0.184553	0.192468	0.195328	0.175116	0.202674	0.193209	0.189065	0.193134	0.174235	0.0707612	0.162878	0.0985703	0.196692	0.157843	0.166788	0.148054	0.209561	0.201225	0.203522	0.216568	0.204675	0.2139	0.222777	0.22579	0.200063	0.169704	0.196755	0.186631	0.195532	0.177136	0.200937	0.207904	0.217608	0.200638	0.225586	0.208288	0.191873	0.151665	0.213852	0.195741
0.195694	0.139358	0.18662	0.185109	0.200222	0.181724	0.209378	0.177167	0.195868	0.173	0.154922	0.0775211	0.169953	0.0954063	0.192707	0.163587	0.162539	0.147381	0.202602	0.213217	0.217936	0.23045	0.213035	0.218957	0.226016	0.228844	0.208156	0.166964	0.186133	0.198375	0.194653	0.17405	0.21217	0.206393	0.210169	0.199576	0.213017	0.219573	0.183761	0.14194	0.205262	0.200458
0.189962	0.149	0.202745	0.195411	0.201867	0.177633	0.201669	0.183887	0.206441	0.17325	0.163568	0.0696889	0.163046	0.0897586	0.184113	0.166871	0.172039	0.140005	0.210382	0.208856	0.21441	0.225474	0.201753	0.21047	0.22229	0.228884	0.194232	0.179537	0.193575	0.183145	0.203071	0.185202	0.20284	0.199643	0.20896	0.191401	0.224336	0.214802	0.183782	0.158999	0.207167	0.202073
0.200325	0.130138	0.190518	0.190748	0.202585	0.173755	0.202492	0.188038	0.202701	0.19381	0.174085	0.0793842	0.163477	0.0993602	0.19751	0.164403	0.172033	0.154119	0.205314	0.202213	0.218575	0.225137	0.219158	0.209816	0.223626	0.230588	0.197596	0.179677	0.19395	0.193683	0.197205	0.180775	0.211282	0.207308	0.207124	0.198454	0.216614	0.214782	0.172344	0.142163	0.207583	0.20522
0.188957	0.140493	0.193865	0.197079	0.198063	0.174411	0.203182	0.18349	0.202745	0.169106	0.154442	0.079997	0.168892	0.0963692	0.209073	0.154284	0.176303	0.149769	0.1996	0.199453	0.211871	0.225377	0.217212	0.215711	0.230107	0.229489	0.201275	0.192372	0.196013	0.188539	0.198393	0.187257	0.20259	0.216685	0.218114	0.190436	0.218312	0.216177	0.205357	0.136648	0.207956	0.20088
0.205392	0.144329	0.200188	0.188899	0.193391	0.171674	0.208513	0.188678	0.198998	0.175233	0.167611	0.079445	0.168083	0.0932913	0.202552	0.163034	0.178825	0.148971	0.217202	0.225839	0.212567	0.212017	0.205428	0.210963	0.214864	0.220022	0.178489	0.169092	0.186068	0.188212	0.200529	0.180363	0.196279	0.197645	0.206287	0.195535	0.216651	0.218741	0.197648	0.137944	0.198949	0.203716
0.204823	0.141933	0.18992	0.192873	0.190997	0.17735	0.203525	0.178011	0.202304	0.182243	0.152114	0.0626237	0.15557	0.0987254	0.196429	0.160747	0.172608	0.161529	0.217714	0.209118	0.2033	0.222895	0.215015	0.212874	0.211886	0.221737	0.171325	0.175896	0.189522	0.197426	0.195321	0.173873	0.194262	0.203643	0.204462	0.194525	0.229148	0.207021	0.193495	0.135665	0.214979	0.200836
0.192956	0.143818	0.183629	0.184331	0.192872	0.181611	0.204433	0.183115	0.193269	0.179158	0.153442	0.0813904	0.150021	0.0895506	0.201052	0.165858	0.176139	0.154146	0.216038	0.198373	0.211748	0.218782	0.212001	0.21537	0.213322	0.217782	0.189286	0.181814	0.187154	0.184679	0.200092	0.181641	0.207981	0.19039	0.204755	0.202425	0.216114	0.21719	0.177773	0.151544	0.197801	0.203916
0.202004	0.140835	0.178743	0.195846	0.199976	0.176414	0.200424	0.178005	0.198533	0.180189	0.161667	0.0683837	0.157448	0.0934561	0.205657	0.158429	0.172548	0.140771	0.208231	0.202413	0.22406	0.22017	0.209721	0.204426	0.219284	0.217202	0.198306	0.177855	0.194722	0.198606	0.200795	0.184774	0.198457	0.189919	0.206758	0.196123	0.21628	0.230719	0.193178	0.155335	0.197742	0.189807
0.196113	0.14752	0.193768	0.179221	0.200053	0.180395	0.197032	0.182483	0.210086	0.187241	0.154982	0.0799724	0.173372	0.0907975	0.18838	0.158876	0.160959	0.146943	0.22887	0.211141	0.226478	0.234993	0.214146	0.208137	0.22453	0.225319	0.199079	0.176489	0.2013	0.191141	0.198498	0.179559	0.198133	0.202036	0.202445	0.198669	0.21315	0.21009	0.197042	0.13473	0.194586	0.203172
0.185476	0.137266	0.186812	0.181526	0.204168	0.183896	0.207445	0.175815	0.202339	0.197191	0.168257	0.0725604	0.16864	0.0961854	0.20313	0.167576	0.181802	0.154731	0.200783	0.206645	0.222338	0.226067	0.224347	0.206325	0.228155	0.224674	0.197329	0.180548	0.18154	0.190079	0.199796	0.178874	0.202987	0.195585	0.214393	0.199079	0.222614	0.229162	0.188362	0.139652	0.210256	0.199952
0.206213	0.134407	0.194451	0.186584	0.190706	0.176915	0.208659	0.171521	0.191337	0.185275	0.160621	0.0831251	0.158921	0.103773	0.207659	0.152137	0.170745	0.15997	0.221455	0.217726	0.219962	0.218493	0.217828	0.216245	0.221789	0.222393	0.197525	0.178598	0.195736	0.192807	0.199755	0.170959	0.207848	0.202774	0.203776	0.195419	0.217076	0.213475	0.194188	0.14107	0.2126	0.204825
0.193248	0.129912	0.190302	0.187315	0.202557	0.171624	0.20813	0.177959	0.189917	0.183945	0.158218	0.0774446	0.169469	0.0980649	0.200616	0.156053	0.174712	0.147659	0.214709	0.204848	0.214111	0.230595	0.20668	0.206006	0.223337	0.225978	0.192105	0.19408	0.188218	0.190345	0.208735	0.178284	0.207029	0.190833	0.201756	0.200287	0.224848	0.216793	0.187551	0.149358	0.201957	0.196703
0.196385	0.1326	0.195365	0.183638	0.19438	0.181095	0.200812	0.179499	0.199651	0.188183	0.155489	0.0803535	0.155603	0.0951213	0.192515	0.167037	0.177643	0.150409	0.206577	0.213051	0.216969	0.216818	0.212579	0.210249	0.217355	0.226007	0.211226	0.176298	0.186476	0.192258	0.199103	0.17653	0.194137	0.203612	0.201513	0.187419	0.218387	0.223849	0.182099	0.141938	0.206272	0.209446
0.187005	0.135253	0.190929	0.193412	0.184969	0.185336	0.198362	0.183892	0.200822	0.180885	0.140075	0.0661206	0.16602	0.0854348	0.20348	0.171082	0.171131	0.139008	0.219796	0.202098	0.215808	0.213578	0.209071	0.222148	0.225297	0.225106	0.195593	0.171776	0.203456	0.183138	0.198198	0.168381	0.202638	0.200944	0.204398	0.193327	0.223282	0.218718	0.193511	0.145895	0.206142	0.202664
0.195664	0.136162	0.203446	0.188406	0.196611	0.177808	0.198634	0.166162	0.205994	0.182334	0.14617	0.0808641	0.160307	0.0971509	0.200902	0.159565	0.167047	0.155297	0.213033	0.211692	0.214477	0.224539	0.203765	0.215361	0.218028	0.21212	0.197286	0.162425	0.191308	0.200021	0.196723	0.181495	0.204433	0.204984	0.20467	0.187829	0.228716	0.212874	0.197815	0.148778	0.203221	0.206695
0.178628	0.139576	0.186296	0.190302	0.195796	0.169175	0.209906	0.175028	0.199248	0.178582	0.158024	0.079158	0.159499	0.0925947	0.189735	0.163405	0.180375	0.147144	0.194438	0.199556	0.212183	0.224094	0.217546	0.211917	0.217776	0.224878	0.199492	0.183389	0.191213	0.181963	0.198404	0.180297	0.19766	0.211284	0.206384	0.198339	0.215155	0.216469	0.193666	0.131534	0.205611	0.204709
0.191215	0.135789	0.188794	0.188989	0.203115	0.180513	0.201483	0.179819	0.196541	0.175988	0.159352	0.072029	0.155233	0.0962413	0.205257	0.170908	0.176224	0.132031	0.215324	0.196625	0.214591	0.217459	0.217219	0.213092	0.219082	0.22828	0.18957	0.186139	0.199213	0.189906	0.204119	0.177816	0.207812	0.201099	0.209565	0.195949	0.219082	0.2246	0.191216	0.152359	0.21363	0.20818
0.202056	0.13569	0.196921	0.191813	0.183152	0.162153	0.211319	0.178597	0.198774	0.190917	0.16353	0.0859947	0.173209	0.0929799	0.194644	0.166479	0.169862	0.139649	0.211896	0.200993	0.210521	0.222462	0.202893	0.203639	0.222325	0.218667	0.20325	0.176151	0.199123	0.193332	0.198603	0.18146	0.214758	0.206568	0.203038	0.198962	0.211453	0.214197	0.190513	0.141881	0.203609	0.204842
0.20238	0.14096	0.185011	0.178639	0.184809	0.175256	0.203516	0.166456	0.193816	0.185637	0.148801	0.0824301	0.170602	0.0944465	0.201364	0.156844	0.17382	0.15065	0.216901	0.209823	0.216243	0.228892	0.217116	0.219627	0.223097	0.212103	0.197737	0.17991	0.181689	0.184554	0.190272	0.172269	0.203158	0.202985	0.205967	0.194371	0.21716	0.208466	0.188225	0.152137	0.210752	0.206497
0.210614	0.136672	0.195009	0.18306	0.200126	0.177164	0.217005	0.175953	0.195672	0.186458	0.1578	0.0743955	0.164553	0.0852281	0.189452	0.170407	0.17441	0.151811	0.210696	0.203992	0.198954	0.227155	0.210264	0.214676	0.218739	0.232987	0.19581	0.179163	0.192508	0.19126	0.20172	0.181772	0.202131	0.201946	0.198831	0.203005	0.222472	0.213654	0.184028	0.145842	0.20768	0.203462
0.193229	0.137893	0.19865	0.19007	0.196308	0.167878	0.196685	0.170903	0.199114	0.187869	0.168507	0.0827516	0.166559	0.0985994	0.193577	0.163534	0.179721	0.143011	0.208858	0.20201	0.220788	0.215502	0.205559	0.202865	0.217842	0.223315	0.198038	0.174531	0.187234	0.179353	0.204166	0.187117	0.197177	0.207595	0.21084	0.197994	0.222826	0.218063	0.195517	0.143939	0.204921	0.204206
0.201848	0.135467	0.187118	0.179054	0.195585	0.180662	0.195562	0.171676	0.195998	0.184899	0.167131	0.078815	0.159743	0.0940852	0.195884	0.169928	0.164395	0.155357	0.206143	0.200943	0.217391	0.224095	0.210981	0.211901	0.223398	0.225538	0.190356	0.183586	0.198229	0.182642	0.191395	0.190988	0.197365	0.203675	0.203348	0.202499	0.228674	0.218342	0.183603	0.144757	0.208479	0.209005
0.189621	0.147218	0.197625	0.19009	0.196329	0.17908	0.214986	0.186642	0.198825	0.183185	0.166333	0.0855408	0.168266	0.0946558	0.195036	0.168671	0.16895	0.144158	0.212899	0.197573	0.200621	0.22286	0.194223	0.212929	0.225807	0.226063	0.198727	0.169398	0.182285	0.188832	0.191908	0.176416	0.204324	0.199632	0.206416	0.193699	0.210804	0.217099	0.19749	0.151425	0.203233	0.198087
0.199308	0.146659	0.192399	0.182941	0.188818	0.162514	0.21176	0.185997	0.182981	0.181233	0.158495	0.0700978	0.164886	0.0982401	0.185104	0.170974	0.169186	0.155934	0.208515	0.206391	0.216817	0.226642	0.207695	0.219566	0.232118	0.222856	0.190881	0.175168	0.191697	0.193389	0.210786	0.188454	0.212656	0.203327	0.200738	0.194649	0.220204	0.206985	0.197438	0.138399	0.201322	0.200565
0.193074	0.133454	0.187522	0.190499	0.186459	0.174431	0.213651	0.175076	0.198179	0.182593	0.154597	0.0921339	0.165277	0.0939376	0.190488	0.16839	0.182625	0.150943	0.203479	0.214772	0.203225	0.216031	0.192536	0.20522	0.217646	0.228994	0.19084	0.183317	0.189535	0.182786	0.195035	0.181147	0.191793	0.209222	0.20269	0.198745	0.219101	0.222259	0.198392	0.150793	0.205219	0.193107
0.200248	0.125957	0.188199	0.189077	0.191181	0.171379	0.215091	0.180734	0.207426	0.18247	0.162049	0.0892986	0.160704	0.104939	0.198987	0.163519	0.168217	0.149284	0.204958	0.208996	0.2043	0.229702	0.210111	0.209383	0.228621	0.217464	0.191908	0.178611	0.187805	0.180786	0.192781	0.180242	0.207659	0.20774	0.208772	0.202194	0.217896	0.218746	0.190254	0.146321	0.199288	0.188468
0.200311	0.136165	0.197163	0.199232	0.189788	0.178069	0.210943	0.180318	0.197996	0.185227	0.169325	0.0697121	0.168107	0.0973161	0.212287	0.173843	0.175558	0.145007	0.199201	0.204456	0.20246	0.223514	0.212812	0.212254	0.227906	0.231958	0.19486	0.17126	0.186266	0.196645	0.207343	0.183753	0.214023	0.198303	0.196865	0.191632	0.219507	0.224423	0.187856	0.145434	0.203497	0.195422
0.206524	0.135106	0.19855	0.179206	0.187168	0.180533	0.205855	0.181797	0.197253	0.186833	0.152685	0.0785142	0.163663	0.0943031	0.197096	0.172231	0.167203	0.155915	0.202752	0.201424	0.212674	0.215209	0.221512	0.20686	0.222895	0.211809	0.194149	0.181487	0.189198	0.187602	0.197956	0.181661	0.200099	0.201305	0.205246	0.197676	0.214806	0.209583	0.194179	0.149542	0.212066	0.201687
0.20203	0.14879	0.197941	0.192734	0.19342	0.169542	0.206269	0.186735	0.19433	0.177523	0.15471	0.0744167	0.172569	0.0950223	0.194797	0.157825	0.175369	0.146962	0.199819	0.207522	0.22056	0.220215	0.210644	0.211085	0.226038	0.220639	0.188746	0.1832	0.192276	0.197872	0.198529	0.179214	0.205366	0.190131	0.204396	0.194259	0.214109	0.218261	0.19622	0.142263	0.199537	0.197434
0.186656	0.131632	0.186246	0.177357	0.211518	0.167281	0.206183	0.179558	0.193697	0.177934	0.155659	0.0773197	0.163803	0.0964221	0.209711	0.160553	0.176293	0.149633	0.218664	0.202546	0.210355	0.226422	0.218035	0.208937	0.22095	0.22599	0.192234	0.181123	0.194262	0.183814	0.193556	0.185398	0.200266	0.210576	0.205325	0.202612	0.222211	0.21433	0.185506	0.140308	0.212283	0.195865
0.205447	0.132152	0.191399	0.192858	0.192357	0.17192	0.203591	0.186546	0.200812	0.182817	0.164913	0.0769873	0.155857	0.1098	0.203435	0.160457	0.172301	0.14816	0.20883	0.204386	0.21435	0.225798	0.209484	0.211787	0.222185	0.224374	0.180206	0.177349	0.19298	0.190779	0.19014	0.183308	0.192982	0.190231	0.205979	0.189685	0.221601	0.220079	0.187655	0.150111	0.211466	0.209083
0.19761	0.138939	0.196803	0.187047	0.195003	0.171809	0.205579	0.18832	0.194276	0.185879	0.160487	0.0807149	0.173008	0.0939602	0.194288	0.170197	0.167089	0.150892	0.209992	0.202969	0.218574	0.223722	0.219122	0.224325	0.20974	0.237472	0.193647	0.185029	0.18931	0.194123	0.204365	0.182141	0.210383	0.207144	0.203554	0.202699	0.223261	0.217193	0.204103	0.144604	0.217437	0.217969
0.185255	0.14208	0.19264	0.182435	0.191521	0.182143	0.197271	0.177148	0.197614	0.182218	0.155978	0.069809	0.1638	0.0940647	0.197264	0.172864	0.175344	0.149505	0.208525	0.218547	0.224534	0.237132	0.21112	0.209008	0.222557	0.23151	0.191596	0.178257	0.187769	0.184236	0.191306	0.181625	0.202483	0.203849	0.212663	0.196092	0.221274	0.222965	0.18289	0.148517	0.208755	0.206036
0.193572	0.131458	0.198664	0.188464	0.195802	0.168574	0.19367	0.173149	0.193973	0.181439	0.165205	0.0737861	0.160174	0.0934463	0.19955	0.162918	0.161248	0.157986	0.215255	0.210977	0.2096	0.223272	0.218495	0.20987	0.219154	0.216821	0.189055	0.182318	0.201145	0.183854	0.195621	0.174365	0.211416	0.198346	0.203254	0.192175	0.21429	0.215446	0.182041	0.1354	0.200159	0.18881
0.208728	0.139447	0.190944	0.189574	0.189692	0.175112	0.208381	0.178388	0.193792	0.182095	0.156853	0.0841293	0.163753	0.101861	0.194343	0.169026	0.171226	0.150115	0.216983	0.208223	0.214954	0.2215	0.206078	0.218136	0.218245	0.23517	0.19734	0.18634	0.192657	0.192585	0.198228	0.184146	0.201875	0.213071	0.199857	0.21064	0.219972	0.211423	0.188422	0.149943	0.19999	0.205933
0.196222	0.142749	0.191087	0.194147	0.204519	0.182183	0.206758	0.176933	0.198278	0.185095	0.162104	0.0796608	0.162478	0.097833	0.186672	0.155087	0.177011	0.159353	0.217279	0.213043	0.217185	0.224207	0.210607	0.212282	0.221917	0.219208	0.195627	0.179496	0.19234	0.1967	0.195322	0.190169	0.197767	0.199805	0.204238	0.188676	0.21334	0.214172	0.195035	0.140696	0.213393	0.196476
0.200451	0.134177	0.19993	0.189808	0.192484	0.179036	0.213391	0.192942	0.197434	0.183973	0.163519	0.076331	0.16535	0.0989326	0.198008	0.170694	0.165443	0.133613	0.214615	0.22067	0.215441	0.219619	0.211517	0.224819	0.216836	0.231997	0.176577	0.178839	0.19149	0.17922	0.195087	0.17759	0.195719	0.201104	0.207923	0.195956	0.219293	0.228883	0.18045	0.148919	0.204722	0.205279
0.196787	0.140586	0.190083	0.190201	0.207627	0.177152	0.198875	0.181936	0.191006	0.189645	0.15839	0.0677266	0.154066	0.0886169	0.191321	0.155001	0.174722	0.151569	0.20693	0.211476	0.216635	0.231283	0.214812	0.209996	0.2305	0.231733	0.194129	0.17886	0.194349	0.187319	0.200996	0.17883	0.208172	0.2107	0.209249	0.193074	0.217001	0.216348	0.193439	0.142524	0.200231	0.208156
0.203422	0.147508	0.188084	0.17684	0.202468	0.167874	0.207006	0.177427	0.19069	0.175968	0.15375	0.0722528	0.160164	0.102117	0.199008	0.164207	0.170824	0.154114	0.206931	0.209361	0.202149	0.226148	0.21065	0.209634	0.226551	0.219492	0.198899	0.179385	0.19728	0.186319	0.197902	0.182757	0.206799	0.197443	0.205342	0.212317	0.209745	0.228518	0.194908	0.135848	0.202439	0.203429
0.196738	0.140917	0.186921	0.18223	0.195787	0.17601	0.205962	0.183512	0.196388	0.181772	0.163372	0.073434	0.166123	0.0885809	0.193575	0.170368	0.171717	0.154475	0.20928	0.211374	0.215098	0.227005	0.22735	0.20989	0.226542	0.223355	0.188443	0.176516	0.198107	0.188058	0.189477	0.17641	0.196387	0.199772	0.20279	0.197896	0.206852	0.213544	0.198221	0.137706	0.208565	0.200613
0.193328	0.132213	0.200472	0.18697	0.192776	0.164779	0.199286	0.179294	0.195396	0.182958	0.160108	0.0752461	0.16113	0.0994071	0.187913	0.160422	0.16932	0.146318	0.212026	0.201379	0.212202	0.225515	0.20683	0.214671	0.223459	0.218968	0.186094	0.180916	0.187097	0.20087	0.192234	0.187119	0.201054	0.203536	0.206919	0.205174	0.221498	0.216542	0.189175	0.142557	0.197402	0.20729
0.195335	0.14784	0.190981	0.199231	0.197663	0.17479	0.204719	0.179223	0.195932	0.18301	0.169174	0.0698433	0.159548	0.094586	0.196252	0.164983	0.167761	0.150262	0.208154	0.206172	0.222674	0.232076	0.209544	0.215417	0.220918	0.213803	0.196661	0.182003	0.173999	0.189796	0.198075	0.18061	0.196266	0.200181	0.213969	0.198621	0.216122	0.21941	0.194448	0.148602	0.205381	0.200104
0.210269	0.148455	0.192725	0.187322	0.198636	0.177489	0.207883	0.188127	0.204344	0.179507	0.156348	0.0776296	0.170975	0.0971447	0.196032	0.159878	0.172482	0.158393	0.216394	0.201275	0.214012	0.226133	0.201265	0.214041	0.225978	0.22419	0.195275	0.1736	0.184895	0.191684	0.193117	0.184733	0.217185	0.207008	0.210574	0.1893	0.222153	0.215815	0.189514	0.149033	0.201097	0.201707
0.195237	0.144809	0.198642	0.189238	0.195121	0.169951	0.207923	0.184681	0.196187	0.192021	0.151051	0.072112	0.158489	0.0948318	0.200521	0.166193	0.169903	0.138148	0.20223	0.202074	0.208111	0.222214	0.209262	0.209728	0.230902	0.221912	0.188408	0.180055	0.194585	0.193319	0.201994	0.178164	0.216117	0.197981	0.205431	0.199188	0.233313	0.217284	0.184515	0.141174	0.209958	0.196127
0.191383	0.148466	0.188019	0.193012	0.205273	0.176912	0.210442	0.173699	0.206024	0.185418	0.161602	0.0774597	0.161347	0.104525	0.1987	0.167661	0.166593	0.145094	0.208445	0.21361	0.205788	0.236422	0.217704	0.219807	0.223343	0.221564	0.198611	0.180575	0.194177	0.185539	0.199501	0.179731	0.200217	0.209017	0.213893	0.204829	0.209499	0.223785	0.202299	0.138284	0.19849	0.203127
0.204777	0.145975	0.197212	0.181759	0.200139	0.171464	0.20095	0.184487	0.200086	0.190169	0.166382	0.0713158	0.170168	0.0974228	0.199384	0.163812	0.167961	0.150823	0.202591	0.201903	0.209073	0.226814	0.211539	0.215749	0.230616	0.216591	0.198045	0.176404	0.191158	0.185765	0.187851	0.185274	0.205985	0.194687	0.209324	0.192328	0.229756	0.218997	0.202691	0.147962	0.20053	0.193666
0.204444	0.150401	0.199748	0.180767	0.194483	0.180935	0.201785	0.180839	0.198361	0.183363	0.155272	0.0810812	0.16506	0.10106	0.197501	0.161445	0.170148	0.143704	0.213792	0.200753	0.212492	0.231345	0.203813	0.202894	0.214584	0.216348	0.19818	0.171278	0.19387	0.183962	0.202305	0.184085	0.198418	0.194055	0.206352	0.204652	0.218791	0.206271	0.194179	0.144458	0.204437	0.202961
0.198157	0.134718	0.181421	0.18456	0.190741	0.172999	0.204281	0.186661	0.19675	0.187688	0.175013	0.0747405	0.159862	0.098974	0.199853	0.172007	0.176157	0.146716	0.213541	0.20547	0.216067	0.221327	0.204853	0.203327	0.218774	0.233603	0.200041	0.1819	0.19686	0.187788	0.206047	0.172462	0.207292	0.199769	0.197408	0.20212	0.223785	0.227587	0.195779	0.149	0.197741	0.212622
0.186398	0.142925	0.188737	0.196956	0.197701	0.176208	0.195407	0.180012	0.203801	0.180932	0.173026	0.0721187	0.161824	0.0983647	0.19067	0.175351	0.174194	0.147538	0.217081	0.1988	0.224539	0.22574	0.213824	0.223406	0.215436	0.221143	0.190829	0.170938	0.196347	0.188413	0.201122	0.192535	0.209607	0.199045	0.213221	0.200761	0.216522	0.221462	0.191126	0.146665	0.205862	0.19659
0.188017	0.146859	0.197941	0.176387	0.200786	0.176111	0.20019	0.16734	0.198383	0.180793	0.165194	0.0687819	0.158782	0.0985323	0.200885	0.173025	0.174471	0.146338	0.211275	0.212247	0.213643	0.219666	0.208427	0.205439	0.216013	0.222077	0.201164	0.178539	0.198304	0.19962	0.185969	0.182703	0.203207	0.215222	0.216483	0.191634	0.224367	0.220971	0.195741	0.137047	0.202845	0.199793
0.190185	0.140238	0.193169	0.193514	0.19072	0.176094	0.202711	0.180128	0.204225	0.182355	0.160945	0.0861565	0.159491	0.0939871	0.196545	0.160654	0.171904	0.140645	0.210972	0.20195	0.228395	0.216292	0.210059	0.20528	0.228507	0.234024	0.195582	0.180679	0.182214	0.19243	0.199915	0.181547	0.204216	0.201707	0.207954	0.191837	0.221159	0.213125	0.187988	0.144382	0.203464	0.200872
0.196052	0.139919	0.197866	0.186811	0.196902	0.182902	0.20551	0.176265	0.19936	0.178672	0.165494	0.0727456	0.162911	0.100188	0.202417	0.155012	0.170388	0.150842	0.221786	0.204592	0.212191	0.224678	0.219733	0.216446	0.225036	0.227128	0.189552	0.175217	0.19633	0.189789	0.187849	0.177892	0.199762	0.190062	0.211667	0.19487	0.216183	0.218328	0.198122	0.137847	0.202015	0.202817
0.191492	0.13429	0.197662	0.180877	0.194355	0.172064	0.20698	0.174731	0.19778	0.181567	0.161612	0.0737588	0.167693	0.0892085	0.196013	0.172969	0.172188	0.157216	0.20937	0.211202	0.212716	0.228126	0.214838	0.222705	0.221336	0.229662	0.198157	0.178104	0.202079	0.189889	0.194014	0.190003	0.198485	0.212756	0.210385	0.200901	0.221541	0.222604	0.185708	0.138298	0.215472	0.204667
0.205179	0.144809	0.194466	0.185982	0.184246	0.186803	0.212489	0.196557	0.20932	0.18472	0.151045	0.0778447	0.167971	0.0902228	0.196635	0.164464	0.168016	0.155414	0.203792	0.196554	0.20516	0.224873	0.214345	0.211136	0.217552	0.227249	0.196049	0.179749	0.197486	0.188233	0.19609	0.178147	0.195944	0.199383	0.208626	0.196998	0.218085	0.219594	0.1912	0.152147	0.211991	0.197708
0.184191	0.140653	0.182944	0.18986	0.193837	0.175464	0.198745	0.17485	0.197656	0.195398	0.16383	0.0799193	0.163792	0.0962833	0.19363	0.168768	0.180451	0.149975	0.207189	0.2024	0.211938	0.212537	0.226545	0.205192	0.212204	0.220583	0.197525	0.18658	0.194795	0.187588	0.195658	0.180746	0.207329	0.198914	0.209471	0.187239	0.222106	0.221138	0.185885	0.154562	0.200006	0.198839
0.182056	0.140305	0.195189	0.190768	0.201104	0.182302	0.207439	0.176846	0.192879	0.181631	0.153646	0.079273	0.156129	0.105571	0.209646	0.160617	0.164234	0.14748	0.204922	0.199026	0.206613	0.224413	0.222776	0.197483	0.217749	0.222978	0.190183	0.176184	0.190052	0.19164	0.205657	0.189864	0.206535	0.203767	0.201001	0.200635	0.225692	0.215608	0.186657	0.146169	0.205409	0.204241
0.203019	0.138037	0.185235	0.18969	0.192758	0.183302	0.199828	0.191061	0.191499	0.182494	0.165959	0.0845113	0.157227	0.0997263	0.191078	0.160335	0.17611	0.149718	0.208314	0.205049	0.205295	0.229368	0.218595	0.214094	0.210847	0.233644	0.187426	0.17863	0.182001	0.185077	0.210329	0.187911	0.206756	0.204308	0.200525	0.199941	0.221326	0.217378	0.188035	0.148242	0.201153	0.202969
0.202565	0.14137	0.18334	0.188985	0.187249	0.172556	0.203602	0.177307	0.196365	0.186797	0.15461	0.0725382	0.157377	0.0994175	0.195296	0.162677	0.173455	0.139993	0.216615	0.20641	0.205425	0.233702	0.212146	0.206827	0.213562	0.225282	0.195924	0.185088	0.182973	0.185786	0.190999	0.183665	0.204739	0.202579	0.211511	0.199827	0.221156	0.214885	0.196089	0.151238	0.204427	0.195839
0.188919	0.146781	0.19167	0.189493	0.195106	0.172838	0.201823	0.178224	0.210733	0.194445	0.170512	0.0728976	0.153229	0.0911342	0.199033	0.166465	0.173585	0.14777	0.221262	0.211488	0.21542	0.216316	0.207923	0.210695	0.228696	0.228747	0.193985	0.185453	0.189031	0.180633	0.206643	0.172034	0.200425	0.207467	0.203783	0.20525	0.231491	0.216626	0.17848	0.142743	0.196965	0.207552
0.188607	0.135034	0.191978	0.185235	0.196589	0.180597	0.205772	0.180898	0.199564	0.172067	0.172684	0.0754205	0.167869	0.105843	0.201412	0.164399	0.183841	0.144793	0.196503	0.205552	0.209044	0.230776	0.221167	0.201446	0.223499	0.222397	0.18875	0.179017	0.185237	0.184928	0.185061	0.173531	0.194527	0.202779	0.208491	0.202262	0.225771	0.216026	0.196505	0.138397	0.214336	0.204226
0.203419	0.138919	0.187444	0.194898	0.198254	0.184243	0.193099	0.181768	0.192238	0.17979	0.159752	0.0765568	0.166666	0.083803	0.189288	0.169551	0.167362	0.146369	0.200825	0.210512	0.214747	0.232273	0.20327	0.212993	0.230599	0.218839	0.198825	0.173259	0.193383	0.193327	0.198237	0.188014	0.197931	0.198138	0.201794	0.193684	0.214529	0.221496	0.188261	0.147625	0.199326	0.209583
0.198019	0.134163	0.197532	0.194895	0.193093	0.18027	0.207714	0.180849	0.207179	0.189393	0.16001	0.0823234	0.167359	0.0867626	0.193468	0.161011	0.172344	0.148993	0.209465	0.200724	0.19822	0.21821	0.218032	0.21581	0.225703	0.236188	0.194047	0.169626	0.195225	0.195588	0.201132	0.181196	0.20685	0.202839	0.20727	0.196311	0.208251	0.224488	0.194072	0.136418	0.208304	0.197799
0.197399	0.12929	0.190239	0.192759	0.198881	0.175799	0.204649	0.186032	0.198962	0.173503	0.150728	0.0746833	0.158984	0.0980551	0.194379	0.165135	0.172694	0.14251	0.197282	0.213498	0.212086	0.221523	0.204129	0.20832	0.214589	0.220794	0.195332	0.178597	0.193036	0.200477	0.194794	0.185485	0.194802	0.195962	0.205892	0.199564	0.21279	0.212103	0.183739	0.148026	0.205074	0.206542
0.19905	0.141717	0.199598	0.18256	0.198945	0.18208	0.214308	0.182255	0.210356	0.184797	0.179711	0.0830858	0.163454	0.0985507	0.191623	0.159492	0.178641	0.145783	0.212811	0.214432	0.205755	0.220061	0.220485	0.22551	0.222362	0.225526	0.192931	0.172155	0.194124	0.188575	0.196826	0.180148	0.198639	0.200405	0.201837	0.198063	0.218641	0.217738	0.191481	0.154483	0.195059	0.205054
0.191834	0.141166	0.197395	0.183491	0.195817	0.167765	0.1988	0.186684	0.202054	0.189125	0.170438	0.0785738	0.164237	0.0930199	0.197881	0.170987	0.176488	0.148776	0.21036	0.211491	0.213216	0.223061	0.21454	0.20809	0.215258	0.22774	0.198366	0.177749	0.200528	0.197577	0.192811	0.181498	0.210983	0.197688	0.210063	0.196998	0.219876	0.224731	0.186817	0.147991	0.202501	0.207129
0.198787	0.136906	0.183752	0.186283	0.19582	0.173335	0.201558	0.18664	0.187893	0.184516	0.165423	0.0817402	0.163434	0.102931	0.195084	0.158187	0.176589	0.14318	0.199779	0.201287	0.218674	0.213269	0.216473	0.21715	0.228139	0.218755	0.192962	0.18387	0.186921	0.189283	0.199574	0.177302	0.200879	0.203003	0.210241	0.201326	0.221116	0.216044	0.185765	0.132825	0.205243	0.210153
0.185209	0.145937	0.193453	0.18832	0.189107	0.177392	0.209472	0.181684	0.199839	0.187516	0.160567	0.0691048	0.172587	0.0928788	0.193822	0.166352	0.171921	0.143637	0.219249	0.206484	0.215576	0.214612	0.203959	0.214656	0.229799	0.228441	0.200841	0.178823	0.188871	0.18425	0.181126	0.174071	0.20636	0.200875	0.204076	0.182109	0.218268	0.220714	0.199708	0.141113	0.198009	0.202559
0.194142	0.151536	0.189276	0.189336	0.188885	0.17677	0.211088	0.176743	0.19565	0.184803	0.162402	0.0709453	0.160619	0.100876	0.186015	0.178151	0.171143	0.138005	0.216326	0.215021	0.213074	0.220344	0.212138	0.215621	0.212859	0.228851	0.20865	0.178702	0.188397	0.198221	0.204524	0.183336	0.198237	0.206614	0.207347	0.199832	0.210785	0.226473	0.18548	0.149723	0.207412	0.202139
0.193961	0.143199	0.18832	0.17659	0.193234	0.169628	0.203506	0.172554	0.201747	0.191006	0.164647	0.0682894	0.166546	0.102778	0.20568	0.161128	0.180432	0.146737	0.204279	0.21953	0.215199	0.233489	0.212609	0.212109	0.214497	0.225199	0.192699	0.174944	0.187621	0.195175	0.197569	0.182587	0.204981	0.202835	0.208565	0.202923	0.210893	0.222796	0.186946	0.130343	0.196823	0.186669
0.193665	0.13323	0.194314	0.186576	0.184617	0.172049	0.209359	0.176484	0.194861	0.186252	0.159705	0.0743365	0.15982	0.096689	0.202662	0.163528	0.169792	0.141708	0.201688	0.203132	0.219851	0.224446	0.212526	0.217307	0.220972	0.214543	0.194401	0.183442	0.202718	0.193718	0.19653	0.17801	0.207977	0.195506	0.215124	0.207843	0.221224	0.226521	0.192861	0.158433	0.19795	0.209286
0.194214	0.143639	0.194635	0.190071	0.201982	0.173273	0.204955	0.185425	0.188327	0.170714	0.148999	0.0774783	0.171234	0.100038	0.191366	0.166137	0.173178	0.151207	0.209723	0.201028	0.201285	0.222318	0.20714	0.219416	0.215218	0.216477	0.205775	0.168257	0.198953	0.19984	0.202143	0.19586	0.204141	0.207046	0.205455	0.20586	0.219123	0.219083	0.195053	0.136762	0.200174	0.198436
0.201463	0.139672	0.19906	0.189078	0.200936	0.177994	0.211607	0.181528	0.193226	0.199225	0.172101	0.0662996	0.169622	0.0980522	0.20623	0.18025	0.162776	0.144033	0.211088	0.215907	0.20854	0.213652	0.221379	0.214771	0.227785	0.222106	0.196236	0.172623	0.199644	0.180694	0.203973	0.177335	0.210139	0.202674	0.206547	0.191624	0.227837	0.22135	0.195905	0.145525	0.200907	0.20005
0.19708	0.133576	0.184242	0.193419	0.198322	0.180635	0.205482	0.187266	0.208152	0.176215	0.157828	0.0855974	0.162617	0.0931375	0.195739	0.166861	0.164938	0.143465	0.205654	0.204384	0.215494	0.22708	0.218056	0.214988	0.224895	0.230022	0.197924	0.176763	0.193567	0.181658	0.206275	0.189405	0.199423	0.213306	0.209307	0.19876	0.210692	0.220148	0.192881	0.136097	0.210475	0.20602
0.188924	0.129984	0.189557	0.189748	0.192139	0.177618	0.208212	0.186846	0.195805	0.184307	0.159139	0.0691514	0.164084	0.0935013	0.19638	0.166703	0.165602	0.140066	0.217005	0.209136	0.216831	0.225189	0.212946	0.215212	0.220177	0.221799	0.209222	0.17712	0.191589	0.186515	0.198872	0.175186	0.20242	0.207298	0.223835	0.196004	0.218924	0.213085	0.184839	0.141353	0.206785	0.200513
0.185366	0.149446	0.194028	0.182182	0.204146	0.171438	0.212311	0.191555	0.198702	0.183119	0.156448	0.0805124	0.155565	0.106793	0.188454	0.174188	0.175843	0.151761	0.202298	0.208744	0.214508	0.240053	0.213122	0.216374	0.222407	0.228544	0.197447	0.173097	0.183432	0.19333	0.194057	0.171864	0.201334	0.21023	0.200224	0.198238	0.228578	0.21748	0.192503	0.14175	0.203303	0.201983
0.191932	0.129893	0.188051	0.184047	0.198099	0.173012	0.201687	0.186966	0.188024	0.176696	0.159968	0.0716259	0.158624	0.0901567	0.201608	0.163397	0.170412	0.13854	0.205991	0.19723	0.212391	0.218516	0.218861	0.214564	0.214642	0.221171	0.193899	0.181376	0.195738	0.188454	0.193918	0.17352	0.208068	0.194533	0.207578	0.18936	0.214892	0.222595	0.190669	0.139895	0.190892	0.208334
0.191611	0.139716	0.187197	0.191459	0.193606	0.171625	0.205695	0.186068	0.196541	0.189075	0.156076	0.073164	0.160062	0.0958211	0.197772	0.154788	0.16916	0.151782	0.208444	0.210441	0.211813	0.219555	0.210503	0.219371	0.215358	0.233407	0.189913	0.178708	0.188041	0.186651	0.203098	0.181035	0.199215	0.195076	0.213624	0.203222	0.220531	0.228789	0.191641	0.14332	0.203914	0.206109
0.198869	0.140425	0.183085	0.185593	0.197157	0.17752	0.202352	0.181605	0.199053	0.183102	0.156178	0.0699468	0.159995	0.0989133	0.198395	0.161769	0.170644	0.140839	0.207618	0.201904	0.224463	0.225092	0.217801	0.217155	0.21273	0.226481	0.187511	0.184881	0.186106	0.197138	0.202518	0.165235	0.198565	0.204048	0.223562	0.201861	0.223731	0.218686	0.19422	0.143873	0.203295	0.205245
0.199195	0.138291	0.199243	0.173838	0.190037	0.180141	0.219277	0.180748	0.199736	0.188267	0.15096	0.0826451	0.157096	0.0946784	0.18631	0.162605	0.167472	0.154021	0.200086	0.205583	0.21236	0.218744	0.21463	0.216626	0.215424	0.216445	0.199554	0.186955	0.188441	0.197298	0.201253	0.177419	0.198306	0.20384	0.210486	0.200741	0.223651	0.208821	0.196485	0.13868	0.206846	0.207472
0.192045	0.138195	0.189005	0.19021	0.19993	0.167396	0.203838	0.19216	0.192865	0.18063	0.162058	0.0793109	0.165916	0.09748	0.199789	0.160291	0.18368	0.14713	0.208023	0.207557	0.212267	0.236821	0.212001	0.206269	0.22557	0.221862	0.193738	0.183875	0.201057	0.179431	0.187767	0.181108	0.200378	0.201546	0.207529	0.19169	0.211783	0.21053	0.187012	0.143309	0.206256	0.208146
0.20028	0.141704	0.188647	0.184579	0.194148	0.172688	0.208276	0.187058	0.195154	0.181352	0.159576	0.0727697	0.1579	0.104286	0.200048	0.178663	0.170314	0.158296	0.213123	0.214815	0.207104	0.223632	0.218298	0.205005	0.217729	0.225266	0.186692	0.171515	0.195059	0.19607	0.194476	0.177245	0.217176	0.205015	0.200995	0.185603	0.22279	0.212705	0.185068	0.150799	0.205723	0.203512
0.195431	0.145836	0.191865	0.181667	0.203392	0.180794	0.205075	0.185176	0.198005	0.189142	0.156977	0.080178	0.159293	0.0969878	0.197358	0.163742	0.166076	0.149939	0.20075	0.212041	0.206945	0.232247	0.21457	0.203273	0.229629	0.236468	0.184826	0.169963	0.193711	0.194333	0.197035	0.185781	0.192494	0.207654	0.210953	0.201754	0.211101	0.214985	0.178426	0.148333	0.205127	0.204562
0.197844	0.138427	0.183222	0.183557	0.197244	0.169563	0.203354	0.176207	0.196483	0.183965	0.157086	0.0757428	0.159059	0.09982	0.19286	0.159427	0.176495	0.141291	0.211557	0.213651	0.212541	0.222671	0.19705	0.218084	0.223333	0.206391	0.193337	0.170994	0.191976	0.187902	0.198693	0.171467	0.202338	0.20179	0.218973	0.189541	0.215704	0.218934	0.203163	0.150311	0.204359	0.194399
0.193163	0.141608	0.188795	0.186233	0.191588	0.181802	0.20938	0.172377	0.203033	0.18681	0.175729	0.0894722	0.161947	0.097286	0.189661	0.167126	0.174123	0.15887	0.216838	0.214775	0.213189	0.226417	0.213313	0.203278	0.226009	0.229072	0.204381	0.173833	0.188465	0.189864	0.197037	0.183216	0.194114	0.201838	0.199771	0.190544	0.215818	0.213899	0.191481	0.157429	0.198981	0.208766
0.189104	0.143367	0.193679	0.193668	0.198692	0.183512	0.207357	0.173982	0.199911	0.185403	0.170085	0.0842331	0.16138	0.101238	0.200234	0.166696	0.167766	0.154252	0.205431	0.210311	0.215743	0.222443	0.213907	0.199712	0.223209	0.221262	0.188114	0.180076	0.187999	0.191985	0.207563	0.177342	0.210451	0.197665	0.212849	0.189267	0.225843	0.213371	0.182336	0.131313	0.204563	0.186868
0.187229	0.134808	0.194878	0.200878	0.190927	0.182288	0.201229	0.172207	0.199318	0.179863	0.163761	0.0782293	0.163995	0.0936287	0.191936	0.166758	0.176115	0.152423	0.205937	0.198061	0.213638	0.230455	0.220096	0.220362	0.225478	0.234833	0.182133	0.178145	0.194802	0.189597	0.197822	0.178436	0.213012	0.201222	0.206078	0.190221	0.220179	0.223244	0.18421	0.149815	0.208141	0.198698
0.182597	0.138239	0.189518	0.189336	0.197893	0.180531	0.209129	0.171279	0.203617	0.183777	0.158687	0.0771632	0.165336	0.0976356	0.198777	0.168297	0.172768	0.149618	0.214652	0.201176	0.207573	0.223565	0.216408	0.223644	0.223589	0.223517	0.192023	0.17645	0.190103	0.187787	0.196027	0.19181	0.207948	0.197749	0.209243	0.190482	0.212462	0.220239	0.200556	0.134344	0.19994	0.191673
0.192665	0.148682	0.184632	0.191974	0.201273	0.171609	0.209594	0.182205	0.200288	0.186399	0.164568	0.0755351	0.16469	0.0872839	0.200903	0.15887	0.170656	0.140769	0.201349	0.20048	0.215055	0.226574	0.20664	0.209274	0.207611	0.225989	0.203507	0.185198	0.198463	0.189082	0.194438	0.177017	0.197432	0.193123	0.213971	0.212512	0.22079	0.223155	0.194853	0.149897	0.217113	0.193163
0.198706	0.140792	0.193207	0.184496	0.198751	0.184053	0.198078	0.175058	0.197743	0.182592	0.162677	0.0714498	0.174453	0.0988693	0.202107	0.161673	0.172073	0.145616	0.209686	0.204277	0.214899	0.224194	0.20531	0.208764	0.223524	0.216689	0.181888	0.176712	0.197585	0.198151	0.198314	0.178525	0.201023	0.197451	0.212152	0.198632	0.216337	0.216753	0.195693	0.160396	0.199518	0.204844
0.197828	0.148579	0.195572	0.189656	0.1854	0.171624	0.213388	0.179925	0.204138	0.177182	0.156175	0.0806764	0.168373	0.104931	0.18549	0.171651	0.169763	0.15042	0.214492	0.208217	0.207743	0.233126	0.21252	0.206883	0.224505	0.214372	0.194843	0.180548	0.184267	0.182565	0.1971	0.185423	0.212444	0.205225	0.209844	0.194145	0.216872	0.22835	0.184987	0.144428	0.207581	0.197915
0.188624	0.146102	0.198085	0.192111	0.192465	0.171363	0.200296	0.173926	0.199373	0.178688	0.149464	0.084293	0.163936	0.0970525	0.181094	0.171736	0.160657	0.140483	0.2044	0.206156	0.204228	0.231211	0.214867	0.213889	0.218846	0.224424	0.184561	0.174575	0.187591	0.185047	0.187917	0.172993	0.205797	0.203233	0.213648	0.202267	0.222913	0.224072	0.178107	0.142241	0.201715	0.213616
0.203649	0.137449	0.205999	0.202899	0.19031	0.174324	0.207564	0.192927	0.201059	0.186145	0.16052	0.0656898	0.147628	0.0952441	0.195247	0.167948	0.174494	0.143687	0.195015	0.209734	0.218709	0.218607	0.215606	0.214988	0.220824	0.226647	0.185026	0.17735	0.192817	0.189507	0.202941	0.178304	0.194102	0.201702	0.21219	0.195926	0.225102	0.207092	0.19284	0.146837	0.210242	0.203771
0.193914	0.135715	0.190496	0.190965	0.187845	0.180231	0.199503	0.182947	0.194814	0.181378	0.16141	0.0701729	0.163205	0.103758	0.192223	0.15812	0.178181	0.143733	0.21541	0.208151	0.208871	0.22962	0.210886	0.20935	0.219012	0.224773	0.189607	0.177065	0.19452	0.184795	0.193102	0.190849	0.194612	0.208735	0.200217	0.198771	0.217266	0.20802	0.194556	0.146327	0.197348	0.20449
0.19679	0.13468	0.180705	0.196399	0.199297	0.173955	0.199198	0.182083	0.202494	0.184138	0.167366	0.0768384	0.175526	0.0871845	0.196869	0.165543	0.168814	0.157981	0.213404	0.20853	0.211044	0.231282	0.221701	0.215019	0.219393	0.238921	0.184399	0.182908	0.184199	0.196191	0.188253	0.177108	0.207416	0.20224	0.208306	0.192453	0.218204	0.217106	0.184866	0.1414	0.205008	0.20201
0.199479	0.142071	0.193608	0.183674	0.188546	0.171184	0.201427	0.178152	0.202929	0.18059	0.150748	0.0823191	0.153371	0.0843101	0.203718	0.161698	0.179411	0.144313	0.205985	0.210702	0.207606	0.219521	0.210683	0.199317	0.213606	0.226526	0.193643	0.175922	0.187412	0.190662	0.185635	0.17993	0.212793	0.206999	0.197555	0.195933	0.214002	0.209815	0.186649	0.14317	0.214079	0.202741
0.191302	0.133349	0.199292	0.191497	0.197262	0.17834	0.203968	0.193579	0.198735	0.179638	0.163764	0.07547	0.172272	0.0934312	0.197988	0.166516	0.17474	0.13747	0.219476	0.208643	0.208419	0.233925	0.225945	0.215723	0.222617	0.213274	0.200933	0.172201	0.188701	0.188451	0.20417	0.184691	0.200212	0.19947	0.214989	0.194165	0.220813	0.216494	0.186995	0.148455	0.203097	0.210102
0.193964	0.145752	0.193674	0.179692	0.185813	0.184022	0.206476	0.17906	0.20339	0.183284	0.15953	0.0793995	0.168648	0.0862948	0.196015	0.160817	0.172288	0.151558	0.217528	0.205757	0.211735	0.225516	0.21577	0.215036	0.219342	0.231094	0.198794	0.176869	0.199379	0.193068	0.189948	0.167348	0.205862	0.201066	0.202634	0.180062	0.222229	0.230346	0.1826	0.141986	0.199646	0.20249
0.190019	0.148313	0.186787	0.187605	0.197358	0.170109	0.205717	0.176156	0.203302	0.184418	0.164445	0.0858948	0.162801	0.0982157	0.200822	0.165655	0.170968	0.151828	0.208715	0.197435	0.217107	0.227687	0.214534	0.221023	0.215165	0.230035	0.189802	0.176125	0.187201	0.182257	0.198385	0.170303	0.203514	0.198396	0.212523	0.193988	0.218398	0.220584	0.187655	0.141122	0.199793	0.198183
0.177363	0.152078	0.196185	0.181437	0.203215	0.171911	0.207898	0.182598	0.199833	0.175294	0.163061	0.0737118	0.151629	0.10153	0.184964	0.164054	0.161875	0.148122	0.211082	0.207353	0.219127	0.213205	0.208144	0.217648	0.21755	0.221711	0.197047	0.180389	0.204392	0.189744	0.201078	0.173159	0.194071	0.203667	0.206404	0.193098	0.222347	0.218915	0.196788	0.14476	0.200815	0.204558
0.198394	0.134058	0.190368	0.180498	0.195621	0.181612	0.190084	0.184714	0.201723	0.181518	0.170252	0.0711029	0.158818	0.0925535	0.188257	0.156513	0.172413	0.145159	0.214117	0.20304	0.216712	0.220998	0.209372	0.214249	0.211333	0.232228	0.186723	0.171591	0.202638	0.188818	0.199517	0.181771	0.206026	0.203971	0.214256	0.190635	0.222972	0.215908	0.187352	0.155549	0.208679	0.208611
0.190843	0.144627	0.191081	0.180506	0.196841	0.174397	0.20603	0.17324	0.20345	0.184045	0.158053	0.07181	0.158936	0.0975313	0.194053	0.165849	0.172961	0.149789	0.211628	0.210679	0.218	0.224539	0.212949	0.214128	0.220592	0.224844	0.185275	0.180492	0.19546	0.192664	0.204113	0.180527	0.202802	0.204641	0.205571	0.198279	0.216455	0.230717	0.196362	0.145007	0.204378	0.216438
0.196304	0.139386	0.193726	0.18718	0.19519	0.183602	0.206652	0.169355	0.199402	0.194483	0.173301	0.0737701	0.187074	0.104576	0.200037	0.162819	0.17064	0.139323	0.203065	0.209814	0.222703	0.22499	0.208705	0.215543	0.22268	0.22472	0.200765	0.176151	0.190189	0.196378	0.19168	0.191087	0.197693	0.20383	0.208161	0.19326	0.216392	0.219279	0.176518	0.139156	0.206936	0.20561
0.18898	0.145146	0.190758	0.195567	0.18893	0.177636	0.21214	0.176329	0.204101	0.180955	0.166509	0.0757366	0.165956	0.0976093	0.197646	0.163023	0.175027	0.138032	0.206377	0.208018	0.214398	0.226153	0.21927	0.209843	0.221862	0.231722	0.19686	0.175496	0.19757	0.189874	0.19894	0.184896	0.208075	0.201762	0.207006	0.189615	0.229204	0.219146	0.191397	0.143059	0.207082	0.201434
0.193531	0.138731	0.198796	0.184485	0.200562	0.184732	0.206984	0.180052	0.18706	0.186199	0.162203	0.0667621	0.162426	0.0944253	0.200647	0.158996	0.173587	0.140694	0.214652	0.199581	0.204523	0.231942	0.20661	0.222652	0.216392	0.228851	0.191675	0.179848	0.191391	0.196151	0.186626	0.175884	0.205748	0.196932	0.206003	0.193026	0.219354	0.21503	0.197569	0.149113	0.211147	0.192666
0.19423	0.135766	0.193466	0.197255	0.202616	0.176757	0.195335	0.179201	0.190472	0.181365	0.154036	0.0772378	0.168949	0.0931736	0.203743	0.163403	0.173925	0.143249	0.204907	0.214116	0.20914	0.226218	0.214163	0.212764	0.220295	0.223784	0.194177	0.182883	0.194154	0.191527	0.19848	0.173653	0.209304	0.208421	0.210958	0.18622	0.222849	0.223593	0.18095	0.145611	0.193188	0.20758
0.199725	0.133511	0.190268	0.18422	0.201226	0.188904	0.211965	0.181616	0.210433	0.191972	0.162506	0.0745005	0.161977	0.10632	0.204963	0.155669	0.167024	0.140996	0.206226	0.20641	0.214128	0.226337	0.203043	0.215719	0.221267	0.233983	0.192295	0.169912	0.191478	0.194582	0.201373	0.168981	0.209152	0.208818	0.203496	0.201069	0.217389	0.218801	0.191274	0.140582	0.194855	0.198644
0.195358	0.13471	0.190557	0.194215	0.187384	0.182866	0.203381	0.187675	0.195537	0.176361	0.166136	0.0711224	0.15038	0.0881597	0.192891	0.16322	0.176299	0.148229	0.213145	0.204434	0.214448	0.236962	0.217691	0.212981	0.212849	0.234997	0.198497	0.185874	0.185299	0.196275	0.192793	0.192246	0.216717	0.199626	0.2045	0.197735	0.226672	0.215107	0.195299	0.151561	0.204388	0.209448
0.186928	0.133068	0.181309	0.189364	0.196277	0.176762	0.208191	0.174029	0.193874	0.182133	0.164604	0.0689754	0.16614	0.0930529	0.190652	0.166902	0.175981	0.149922	0.213536	0.205868	0.208744	0.224868	0.207235	0.214352	0.230532	0.21894	0.197194	0.17949	0.199121	0.185829	0.186733	0.178888	0.207378	0.215299	0.202391	0.188754	0.214894	0.211159	0.193007	0.143447	0.200904	0.201333
0.197097	0.135183	0.190515	0.186185	0.190543	0.172139	0.215415	0.178999	0.200704	0.188632	0.149962	0.076564	0.171245	0.0969193	0.196986	0.165313	0.180399	0.147533	0.210289	0.198077	0.21806	0.220396	0.206026	0.215085	0.227725	0.228982	0.199728	0.17607	0.19314	0.191297	0.187355	0.177882	0.206637	0.200129	0.211429	0.205726	0.225125	0.214338	0.182898	0.143995	0.213251	0.206453
0.181831	0.145525	0.193775	0.189216	0.198328	0.179841	0.206713	0.182742	0.203378	0.180737	0.157851	0.067015	0.163017	0.0940321	0.190453	0.156599	0.180124	0.141206	0.207917	0.202156	0.219863	0.221824	0.21964	0.209778	0.220067	0.229208	0.193094	0.176215	0.185847	0.192302	0.199667	0.178335	0.199099	0.202813	0.211923	0.198418	0.221823	0.215731	0.1855	0.136357	0.205372	0.204343
0.211096	0.1439	0.196665	0.187555	0.200069	0.174166	0.200298	0.170281	0.188759	0.186378	0.168683	0.0736918	0.165573	0.105974	0.197296	0.166596	0.182858	0.143778	0.208714	0.20096	0.212236	0.227975	0.216688	0.217804	0.222717	0.224257	0.19663	0.182304	0.196786	0.184441	0.199948	0.18643	0.207188	0.200079	0.203419	0.189472	0.212951	0.22518	0.19026	0.139472	0.200909	0.207032
0.187865	0.137301	0.189158	0.18717	0.199607	0.169289	0.202008	0.178709	0.196038	0.188615	0.157853	0.0781725	0.167322	0.0893303	0.211002	0.158041	0.171051	0.157633	0.217756	0.202338	0.213893	0.233173	0.211676	0.220864	0.231077	0.222188	0.197848	0.170318	0.181252	0.182293	0.199024	0.175486	0.20533	0.207546	0.201516	0.210082	0.217361	0.224187	0.189501	0.154065	0.204091	0.211644
0.201812	0.131705	0.193236	0.187305	0.198991	0.17354	0.20681	0.181882	0.195622	0.177664	0.159116	0.0635904	0.16246	0.0872897	0.194065	0.171828	0.176213	0.139263	0.211786	0.211476	0.216539	0.216086	0.212499	0.215599	0.221146	0.226884	0.194138	0.166415	0.190152	0.186788	0.197124	0.181595	0.191823	0.199553	0.206329	0.197099	0.225934	0.213167	0.202472	0.152386	0.206566	0.203341
0.204225	0.140425	0.187658	0.184604	0.192638	0.179547	0.203052	0.175373	0.195023	0.19378	0.15455	0.0791492	0.175021	0.0981173	0.195795	0.156989	0.164198	0.150065	0.22223	0.209424	0.205744	0.222054	0.210769	0.219541	0.230647	0.218234	0.191256	0.172382	0.20021	0.185515	0.192456	0.183944	0.206606	0.193909	0.201339	0.198405	0.21751	0.220161	0.19947	0.136937	0.206595	0.198661
0.205856	0.135378	0.183574	0.187133	0.190028	0.171745	0.202296	0.182511	0.191655	0.181697	0.15636	0.0787815	0.169485	0.0979357	0.199059	0.170528	0.182131	0.134109	0.208682	0.209609	0.211496	0.235621	0.213614	0.215532	0.227051	0.221406	0.196521	0.178324	0.190527	0.187913	0.197231	0.192133	0.200318	0.198361	0.204794	0.198063	0.216049	0.217362	0.192913	0.14212	0.205696	0.205448
0.200901	0.146034	0.190957	0.188973	0.197085	0.177488	0.20518	0.177441	0.196702	0.177449	0.170338	0.0819509	0.15301	0.104161	0.200893	0.166822	0.171069	0.155962	0.209527	0.216322	0.212675	0.229777	0.221724	0.201764	0.22328	0.216459	0.209006	0.17216	0.201588	0.187214	0.195748	0.175564	0.200798	0.194126	0.211187	0.196874	0.213478	0.216001	0.174838	0.144438	0.212485	0.191632
0.188054	0.143182	0.192989	0.188166	0.199368	0.171938	0.210827	0.167148	0.202495	0.1903	0.160281	0.0857105	0.161541	0.0954858	0.195545	0.16421	0.172994	0.154446	0.212823	0.195412	0.220144	0.21428	0.219545	0.203653	0.219359	0.220926	0.205005	0.192401	0.19714	0.185075	0.195532	0.187363	0.195802	0.206248	0.216953	0.198209	0.215569	0.221604	0.178944	0.149421	0.203817	0.194183
0.201068	0.145218	0.176521	0.19192	0.187429	0.177708	0.200917	0.186568	0.199034	0.194478	0.162982	0.0735764	0.166365	0.0995777	0.205493	0.163693	0.188862	0.151364	0.212565	0.201058	0.222439	0.216273	0.215847	0.210365	0.229491	0.229049	0.203304	0.167396	0.188312	0.191682	0.18963	0.17963	0.211465	0.215975	0.211599	0.190655	0.215664	0.219403	0.192684	0.147392	0.201125	0.201684
0.20433	0.1412	0.192974	0.198405	0.181902	0.174211	0.206341	0.17814	0.196987	0.179368	0.16112	0.0816174	0.161261	0.0856235	0.20095	0.160816	0.182139	0.148289	0.214638	0.208014	0.224474	0.232488	0.204193	0.206375	0.224499	0.22626	0.205992	0.180786	0.18134	0.179944	0.206957	0.179776	0.217762	0.196728	0.209738	0.202771	0.215801	0.222275	0.190819	0.136024	0.197855	0.209371
0.191088	0.148689	0.193911	0.188591	0.195722	0.171593	0.196436	0.178577	0.195641	0.182882	0.156314	0.0750305	0.161143	0.0914608	0.191388	0.16417	0.184268	0.148085	0.216166	0.210483	0.222084	0.220262	0.21721	0.211359	0.218052	0.222315	0.187492	0.18276	0.193993	0.193587	0.202542	0.178937	0.205138	0.19234	0.205826	0.195281	0.219138	0.220653	0.180113	0.156984	0.212368	0.204808
0.197974	0.146291	0.192345	0.199957	0.190931	0.181313	0.197707	0.173214	0.19428	0.179202	0.161509	0.0826581	0.159289	0.104299	0.191431	0.171428	0.16639	0.153788	0.215938	0.199476	0.217877	0.216595	0.19618	0.208952	0.213148	0.218772	0.203745	0.183533	0.18696	0.200177	0.206715	0.176311	0.203466	0.199608	0.212636	0.19289	0.221613	0.215635	0.184423	0.130036	0.198748	0.208119
0.204931	0.141991	0.194432	0.195149	0.191662	0.166087	0.196264	0.173626	0.191567	0.17844	0.148754	0.0797548	0.164162	0.0954634	0.196372	0.175121	0.166752	0.146293	0.216995	0.194643	0.217465	0.226403	0.207673	0.223006	0.229551	0.230205	0.191864	0.181618	0.190529	0.183009	0.200091	0.176672	0.205423	0.200828	0.208055	0.206742	0.214356	0.216851	0.193169	0.138822	0.200079	0.200262
0.202793	0.142887	0.192387	0.175287	0.188205	0.176044	0.204826	0.179643	0.20216	0.179928	0.167631	0.07814	0.171141	0.0907727	0.197686	0.159784	0.176729	0.146139	0.212252	0.200318	0.209636	0.224919	0.212515	0.206735	0.213235	0.218472	0.184308	0.177926	0.192797	0.180079	0.201769	0.186775	0.204348	0.212714	0.20977	0.195589	0.224654	0.209597	0.195466	0.150806	0.199685	0.19554
0.192512	0.134886	0.194379	0.19603	0.197804	0.180369	0.203276	0.177393	0.192248	0.174407	0.160393	0.0829154	0.169835	0.102144	0.202148	0.159502	0.170064	0.144469	0.203485	0.211721	0.212617	0.234861	0.210257	0.211526	0.215506	0.225529	0.200915	0.177125	0.194308	0.185359	0.209565	0.187344	0.204752	0.191942	0.202897	0.201192	0.217204	0.217674	0.180163	0.140633	0.210373	0.199391
0.198393	0.134569	0.187058	0.190452	0.198572	0.184472	0.203151	0.181961	0.191033	0.186478	0.166135	0.077608	0.167739	0.0945574	0.189381	0.161827	0.174428	0.153601	0.201733	0.201654	0.221585	0.226315	0.207817	0.225215	0.211513	0.225264	0.189608	0.169138	0.184325	0.194662	0.205273	0.182607	0.192219	0.206087	0.212655	0.188624	0.216489	0.217412	0.185006	0.14754	0.209035	0.193755
0.198409	0.138145	0.195112	0.184416	0.186732	0.175549	0.201256	0.17891	0.203344	0.190393	0.154211	0.0760374	0.161082	0.0931044	0.200735	0.175561	0.167596	0.152445	0.206253	0.200743	0.202643	0.221989	0.214529	0.209021	0.209277	0.221957	0.186934	0.171267	0.191226	0.193284	0.198437	0.181905	0.195754	0.208022	0.190877	0.191242	0.215875	0.207245	0.193924	0.149345	0.200247	0.194254
0.213988	0.148136	0.191087	0.190626	0.189859	0.174204	0.20761	0.178895	0.189547	0.179414	0.165096	0.0714562	0.165367	0.0975339	0.195566	0.179264	0.168193	0.158163	0.205887	0.208416	0.208002	0.22093	0.211958	0.212233	0.218213	0.224505	0.199931	0.172811	0.192708	0.186937	0.200563	0.183166	0.202904	0.207478	0.211542	0.19518	0.216907	0.219542	0.190548	0.140313	0.20333	0.205775
0.201592	0.142068	0.200452	0.201879	0.184892	0.162898	0.202488	0.177248	0.202415	0.185381	0.163486	0.0759521	0.16342	0.0930354	0.195514	0.161939	0.173318	0.136654	0.216858	0.213773	0.211269	0.240932	0.2093	0.217063	0.213369	0.227066	0.201521	0.182507	0.188539	0.181787	0.193113	0.174444	0.207149	0.194541	0.200482	0.209718	0.218546	0.220693	0.19593	0.160652	0.196785	0.205729
0.215546	0.140627	0.199179	0.198071	0.181119	0.168605	0.210027	0.177089	0.205755	0.186853	0.158326	0.0715809	0.162887	0.105843	0.201593	0.165149	0.17117	0.154815	0.21303	0.204621	0.220139	0.215629	0.21485	0.203815	0.231692	0.216061	0.19792	0.17517	0.190693	0.199408	0.202491	0.17118	0.207696	0.203428	0.206608	0.200051	0.222769	0.219591	0.19216	0.144481	0.209792	0.201966
0.198129	0.138154	0.189533	0.186214	0.196499	0.179188	0.201262	0.183649	0.202352	0.19218	0.163386	0.0814412	0.167848	0.0926495	0.196145	0.152315	0.177989	0.162975	0.209156	0.201788	0.216264	0.226457	0.208825	0.220441	0.219677	0.217913	0.201325	0.172675	0.187155	0.186121	0.194947	0.190598	0.202333	0.201543	0.19863	0.195816	0.202879	0.208726	0.176849	0.151186	0.20896	0.205493
0.199477	0.143828	0.189414	0.192787	0.202573	0.169446	0.196819	0.182411	0.204323	0.177532	0.160909	0.0833524	0.161352	0.0932731	0.196292	0.167119	0.169514	0.154152	0.20425	0.204827	0.210085	0.219617	0.211524	0.2149	0.217692	0.227999	0.194048	0.182113	0.199349	0.19384	0.194454	0.176836	0.201198	0.19999	0.202752	0.20229	0.221817	0.217416	0.187461	0.135085	0.198947	0.202712
0.192297	0.149931	0.192923	0.185179	0.200611	0.169643	0.221063	0.172339	0.203609	0.181804	0.166059	0.077032	0.170233	0.101297	0.189462	0.15714	0.168959	0.1502	0.213683	0.211264	0.214987	0.226082	0.218219	0.205137	0.225867	0.225811	0.191597	0.175642	0.191991	0.18509	0.189602	0.179498	0.197598	0.198344	0.209679	0.189793	0.226893	0.222367	0.187891	0.140675	0.217427	0.194626
0.203974	0.148885	0.192338	0.194209	0.188936	0.178103	0.200702	0.178418	0.201646	0.184053	0.153451	0.0734927	0.154285	0.0888612	0.205722	0.165326	0.169557	0.147676	0.217607	0.203022	0.2168	0.226061	0.207225	0.210317	0.211186	0.22661	0.198719	0.184562	0.197757	0.187898	0.199229	0.186214	0.207103	0.192459	0.208562	0.198078	0.215028	0.214134	0.192672	0.153872	0.207119	0.198467
0.198531	0.148627	0.188159	0.200237	0.200251	0.169126	0.203033	0.176832	0.195385	0.178857	0.160428	0.0725304	0.165857	0.0945744	0.192832	0.1561	0.167475	0.154743	0.215671	0.213974	0.212185	0.234953	0.205331	0.21186	0.201362	0.229849	0.193678	0.177021	0.181083	0.189979	0.207	0.172741	0.20423	0.209286	0.20422	0.183643	0.213461	0.21741	0.186418	0.136839	0.211691	0.205109
0.189245	0.133806	0.199521	0.192373	0.187425	0.174815	0.204881	0.174461	0.205415	0.189069	0.159754	0.0808818	0.172376	0.0929414	0.198026	0.158763	0.172141	0.148366	0.212155	0.204225	0.217771	0.214492	0.208884	0.20735	0.220844	0.232433	0.197574	0.178225	0.188379	0.188586	0.199488	0.182711	0.200419	0.205688	0.199485	0.188077	0.215456	0.216003	0.189514	0.144788	0.206659	0.192743
0.190915	0.141376	0.18969	0.182176	0.19541	0.171303	0.207173	0.18147	0.196551	0.181296	0.168136	0.0767345	0.173664	0.0952859	0.18958	0.162698	0.162888	0.151495	0.207831	0.205146	0.215507	0.215702	0.204735	0.202829	0.215241	0.232411	0.192019	0.17482	0.184504	0.199093	0.195704	0.179824	0.197625	0.205935	0.203382	0.199255	0.211928	0.215081	0.196	0.148949	0.204399	0.208196
0.199109	0.133006	0.188055	0.189581	0.196136	0.174662	0.198147	0.173223	0.200516	0.190792	0.156926	0.0812191	0.16648	0.0927948	0.191298	0.157289	0.178665	0.150297	0.206748	0.213765	0.208978	0.226372	0.213709	0.211509	0.234836	0.227961	0.194982	0.185583	0.193369	0.19315	0.203339	0.179775	0.214349	0.208632	0.212289	0.197894	0.217753	0.214173	0.183066	0.141342	0.19948	0.202683
0.168237	0.131871	0.191402	0.191505	0.197492	0.174735	0.220221	0.192767	0.208758	0.185627	0.165157	0.0732257	0.159342	0.0964065	0.200415	0.161493	0.167689	0.151653	0.207871	0.202339	0.20625	0.214755	0.218649	0.211578	0.22477	0.226548	0.19144	0.179673	0.187539	0.194565	0.198045	0.176739	0.206774	0.200863	0.204591	0.190714	0.217144	0.221565	0.203932	0.137365	0.203163	0.203989
0.200299	0.136754	0.184042	0.190397	0.197006	0.178174	0.19609	0.180797	0.185661	0.188126	0.159668	0.0801711	0.17081	0.0996249	0.20269	0.165145	0.167615	0.140619	0.207281	0.210603	0.202726	0.227954	0.21541	0.214961	0.216664	0.218565	0.199511	0.17731	0.190765	0.185022	0.197626	0.181256	0.20881	0.199234	0.200005	0.192896	0.219187	0.209054	0.194736	0.141428	0.21149	0.198345
0.195981	0.14141	0.194003	0.186003	0.19286	0.169978	0.214893	0.183174	0.187978	0.179242	0.160506	0.0655365	0.162749	0.0921251	0.199053	0.1584	0.170296	0.147826	0.211264	0.202587	0.212654	0.221737	0.225124	0.219201	0.226885	0.219072	0.192906	0.178947	0.200768	0.192394	0.202027	0.185139	0.200452	0.199349	0.203008	0.192409	0.214558	0.209165	0.18972	0.151469	0.199462	0.203009
0.205172	0.142607	0.185234	0.177406	0.187949	0.166209	0.203697	0.187157	0.19265	0.184089	0.161687	0.0847072	0.167713	0.102654	0.203449	0.164738	0.171498	0.153723	0.209855	0.20863	0.223245	0.222535	0.21213	0.206888	0.221344	0.223289	0.183676	0.177014	0.19074	0.190807	0.188477	0.176453	0.200491	0.206352	0.202107	0.193402	0.216328	0.21403	0.19332	0.151738	0.210105	0.191756
0.203566	0.14678	0.187931	0.199532	0.192616	0.170991	0.205937	0.17687	0.210346	0.189358	0.155079	0.0692987	0.16639	0.0945749	0.189439	0.163812	0.183298	0.155926	0.20302	0.196878	0.207422	0.222861	0.219289	0.210777	0.212371	0.229231	0.190997	0.177168	0.193609	0.185289	0.204291	0.176713	0.200417	0.200676	0.199084	0.198786	0.224814	0.213741	0.194465	0.129467	0.201361	0.198714
0.191398	0.137933	0.188754	0.186536	0.190918	0.16784	0.206898	0.175256	0.198264	0.189243	0.163626	0.0734768	0.17118	0.0995348	0.193062	0.161537	0.164219	0.141393	0.215201	0.199974	0.206851	0.230727	0.205214	0.21512	0.220366	0.219907	0.205981	0.170085	0.194523	0.185497	0.19374	0.176421	0.201248	0.195591	0.204767	0.20303	0.228936	0.213133	0.196667	0.13777	0.199375	0.195702
0.197355	0.150547	0.191025	0.190407	0.195483	0.17569	0.203702	0.184411	0.196944	0.188616	0.152003	0.0806112	0.154065	0.0955682	0.190838	0.161493	0.167318	0.155607	0.203912	0.198833	0.203394	0.222167	0.211466	0.222968	0.220882	0.2212	0.190585	0.173762	0.200135	0.196976	0.204494	0.17575	0.208206	0.199252	0.208178	0.208069	0.213734	0.211353	0.196343	0.133334	0.201049	0.197968
0.193632	0.138529	0.197126	0.178014	0.201921	0.172055	0.204527	0.179977	0.196157	0.180097	0.166372	0.0738415	0.14568	0.098138	0.201954	0.173314	0.175523	0.151254	0.209648	0.20923	0.209315	0.225713	0.200939	0.209236	0.218018	0.21561	0.198766	0.171682	0.189582	0.194052	0.192597	0.179889	0.215909	0.205007	0.199782	0.188472	0.21345	0.220776	0.191838	0.139633	0.204565	0.199886
0.190162	0.139007	0.195804	0.187201	0.185032	0.17779	0.201039	0.18055	0.198539	0.191986	0.172035	0.0802591	0.164132	0.0997251	0.196197	0.158228	0.168721	0.156329	0.19848	0.201987	0.199132	0.223888	0.212091	0.211392	0.226605	0.231315	0.193453	0.16349	0.193476	0.179232	0.199052	0.190621	0.201462	0.190846	0.201692	0.20146	0.221338	0.226755	0.2078	0.145854	0.21023	0.211248
0.196031	0.137688	0.19272	0.186	0.197767	0.178053	0.203982	0.169727	0.197496	0.187185	0.155794	0.0678949	0.165364	0.0936688	0.194991	0.167373	0.17104	0.15337	0.208334	0.19601	0.218521	0.221949	0.21396	0.207493	0.226629	0.222893	0.195252	0.17792	0.189932	0.194492	0.192446	0.187547	0.208175	0.206684	0.20163	0.198178	0.21114	0.204067	0.191836	0.139173	0.208466	0.20276
0.184716	0.135341	0.188977	0.176803	0.187201	0.184286	0.200206	0.184204	0.195436	0.186336	0.16608	0.0754855	0.161021	0.096434	0.201002	0.159361	0.181023	0.148569	0.201902	0.206926	0.207711	0.216221	0.213522	0.221124	0.222346	0.221743	0.185036	0.172634	0.190824	0.197343	0.189673	0.182435	0.204082	0.203594	0.212115	0.19383	0.229407	0.215827	0.18252	0.149279	0.19829	0.203093
0.206411	0.144002	0.202697	0.188032	0.194863	0.171961	0.198042	0.178386	0.194232	0.194969	0.163194	0.0787535	0.1746	0.0899313	0.199269	0.160881	0.180846	0.149307	0.205854	0.208257	0.213397	0.218141	0.21107	0.203844	0.225922	0.221144	0.189793	0.177776	0.182963	0.19283	0.196986	0.184411	0.197156	0.19987	0.203923	0.191541	0.222974	0.207882	0.189268	0.152275	0.204959	0.196011
0.199112	0.150237	0.201693	0.183393	0.196603	0.172489	0.214288	0.175985	0.192916	0.183578	0.160231	0.0733934	0.169918	0.0883286	0.199492	0.154844	0.175378	0.145866	0.225176	0.201713	0.215054	0.227826	0.221344	0.208753	0.214239	0.22917	0.198579	0.18556	0.198897	0.196349	0.189236	0.176611	0.199456	0.203093	0.212798	0.184367	0.222425	0.225594	0.188287	0.136402	0.198213	0.195991
0.197361	0.140892	0.193908	0.185127	0.19574	0.166763	0.207111	0.180248	0.200727	0.17317	0.160522	0.0704222	0.169193	0.105729	0.202469	0.163759	0.174738	0.142507	0.217214	0.215449	0.208976	0.232348	0.212462	0.213316	0.225967	0.217695	0.189811	0.168334	0.19576	0.191249	0.186937	0.185495	0.220607	0.196862	0.205264	0.183987	0.219504	0.219031	0.182279	0.141113	0.201229	0.208778
0.193741	0.13485	0.195213	0.188156	0.197402	0.166425	0.205689	0.173561	0.188042	0.185822	0.162574	0.0772679	0.170349	0.0949239	0.191852	0.163996	0.178016	0.145215	0.202108	0.205306	0.211168	0.225041	0.210038	0.200238	0.219581	0.224345	0.187365	0.176832	0.193615	0.185936	0.203552	0.179003	0.210201	0.212789	0.2062	0.19328	0.223538	0.218873	0.201099	0.135627	0.20886	0.202736
0.186734	0.14337	0.193177	0.192811	0.182793	0.185072	0.203268	0.182806	0.199814	0.186804	0.166952	0.0647549	0.157573	0.103416	0.202817	0.16903	0.171227	0.144979	0.209466	0.206359	0.203714	0.213998	0.214451	0.211582	0.229375	0.227737	0.195396	0.180957	0.193601	0.189293	0.203586	0.185322	0.202171	0.195928	0.194236	0.198734	0.221183	0.213599	0.19659	0.144549	0.197267	0.205582
0.199664	0.139255	0.187854	0.185083	0.19527	0.183206	0.212728	0.177647	0.193258	0.187328	0.154316	0.0836387	0.169868	0.0951556	0.194217	0.168253	0.174892	0.155994	0.215431	0.206801	0.207179	0.21824	0.217399	0.216557	0.22818	0.220905	0.208699	0.18226	0.197293	0.1821	0.195925	0.170076	0.204569	0.201193	0.212236	0.191127	0.219198	0.21355	0.182223	0.15053	0.211126	0.203387
0.194184	0.132456	0.196585	0.196791	0.202437	0.18459	0.199091	0.185485	0.201666	0.183716	0.159356	0.0769819	0.170059	0.098869	0.20513	0.174471	0.167599	0.14459	0.211288	0.21717	0.208683	0.23239	0.209498	0.215361	0.212524	0.222986	0.182273	0.182166	0.191483	0.203397	0.189757	0.182793	0.204049	0.187327	0.202733	0.188918	0.225154	0.218643	0.186707	0.1452	0.218357	0.197774
0.207541	0.14334	0.196763	0.180867	0.198334	0.18244	0.212459	0.178514	0.196587	0.180618	0.160238	0.0688943	0.161033	0.0895423	0.205462	0.153366	0.162102	0.151872	0.20116	0.19809	0.212847	0.226243	0.217336	0.211008	0.222595	0.22355	0.199933	0.181632	0.189221	0.183743	0.205138	0.180019	0.205414	0.203825	0.199872	0.201529	0.22136	0.21947	0.190049	0.141953	0.194467	0.203427
0.184766	0.142844	0.191811	0.180021	0.190808	0.174202	0.207667	0.173679	0.194434	0.195093	0.163355	0.0759675	0.163282	0.0902865	0.197358	0.175775	0.169967	0.143768	0.216666	0.208667	0.215929	0.226128	0.202548	0.211442	0.212734	0.233576	0.190805	0.174352	0.193818	0.184256	0.193201	0.170333	0.208825	0.197411	0.197245	0.199686	0.211113	0.222277	0.193324	0.149976	0.201812	0.21475
0.198679	0.142291	0.190734	0.18848	0.187063	0.174198	0.202863	0.182027	0.1964	0.185713	0.163775	0.0749887	0.165354	0.0926327	0.196552	0.161452	0.173497	0.152502	0.205115	0.213849	0.218964	0.223556	0.213659	0.209744	0.216051	0.229195	0.191548	0.173342	0.195987	0.192824	0.203549	0.188994	0.203131	0.205331	0.205256	0.189095	0.211749	0.224825	0.197405	0.153262	0.21046	0.20098
0.190749	0.144132	0.19886	0.182246	0.198652	0.176409	0.212676	0.178598	0.201392	0.183751	0.160061	0.0762496	0.170647	0.102786	0.208683	0.161773	0.16798	0.155771	0.210537	0.212413	0.211289	0.229628	0.204591	0.205226	0.220551	0.225664	0.194132	0.175679	0.196624	0.190628	0.18824	0.184018	0.214525	0.192669	0.216028	0.202877	0.220319	0.226426	0.199853	0.152579	0.20257	0.198773
0.194125	0.143354	0.194335	0.182428	0.20422	0.170489	0.207137	0.175677	0.197834	0.179056	0.165769	0.064964	0.162286	0.0930703	0.202019	0.167901	0.172871	0.145014	0.20146	0.210947	0.218869	0.216357	0.215067	0.204169	0.211366	0.227749	0.198611	0.1775	0.198736	0.186848	0.185845	0.195826	0.206515	0.190586	0.208822	0.193041	0.22182	0.219412	0.199312	0.142894	0.210683	0.203623
0.201038	0.125654	0.183689	0.18501	0.197101	0.181324	0.213	0.173659	0.196748	0.176264	0.162175	0.0757634	0.160326	0.0975136	0.196025	0.172706	0.179039	0.148806	0.207321	0.218102	0.213152	0.222672	0.214385	0.210929	0.22358	0.226334	0.210585	0.181814	0.183055	0.186392	0.201061	0.180655	0.202692	0.209391	0.212437	0.197506	0.219179	0.221666	0.19058	0.140158	0.197232	0.201331
0.198569	0.130765	0.187432	0.187081	0.187401	0.179471	0.210461	0.178903	0.212542	0.182958	0.161528	0.0817866	0.156032	0.0916305	0.199297	0.159804	0.161091	0.142642	0.202596	0.203246	0.214453	0.224283	0.201399	0.213877	0.226999	0.215781	0.190358	0.181943	0.199627	0.168216	0.19602	0.185891	0.202759	0.204587	0.20726	0.192907	0.214075	0.222502	0.183521	0.13977	0.211331	0.216229
0.196781	0.14488	0.182483	0.19355	0.195197	0.175039	0.200987	0.172747	0.195773	0.185091	0.161248	0.0907525	0.150364	0.0922066	0.192758	0.159234	0.166535	0.142085	0.215475	0.212068	0.215046	0.227724	0.221121	0.2096	0.224162	0.2243	0.196813	0.179999	0.187712	0.196876	0.212834	0.193234	0.203392	0.207399	0.202653	0.20801	0.228436	0.221148	0.181432	0.137762	0.201476	0.193709
0.18951	0.134738	0.187593	0.182906	0.194232	0.177063	0.202569	0.18016	0.188103	0.184092	0.153443	0.0828137	0.155342	0.0929838	0.20563	0.159514	0.173561	0.147998	0.202219	0.21098	0.213774	0.223443	0.210003	0.212761	0.215608	0.216438	0.188702	0.182328	0.197169	0.199291	0.190959	0.178516	0.198635	0.200169	0.202499	0.195333	0.213978	0.215882	0.195987	0.135126	0.212271	0.200606
0.197104	0.136851	0.194886	0.192639	0.193048	0.178753	0.211748	0.175242	0.196021	0.187402	0.157382	0.0830453	0.165621	0.0986939	0.203776	0.157279	0.17232	0.158493	0.200033	0.206897	0.222892	0.22669	0.203859	0.210745	0.226322	0.221368	0.194845	0.184203	0.182906	0.183378	0.199774	0.176054	0.203724	0.194282	0.203017	0.204086	0.227081	0.213446	0.198239	0.14624	0.212701	0.203184
0.202633	0.149852	0.198677	0.186814	0.198005	0.172471	0.206558	0.17613	0.200945	0.188613	0.158543	0.0771003	0.168165	0.0876099	0.193292	0.164871	0.171373	0.14269	0.202643	0.210943	0.211342	0.210466	0.213026	0.212463	0.220146	0.209879	0.192104	0.179821	0.19968	0.198098	0.197653	0.190722	0.210159	0.202681	0.212793	0.192959	0.217829	0.212993	0.194528	0.140393	0.205387	0.204297
0.203316	0.150857	0.185158	0.187475	0.197778	0.175276	0.194297	0.178837	0.195004	0.183218	0.154999	0.0746609	0.166098	0.0976067	0.201767	0.165284	0.166001	0.159248	0.207143	0.209995	0.216163	0.231835	0.21932	0.214293	0.229751	0.216121	0.190679	0.181469	0.195971	0.190644	0.199099	0.174974	0.208292	0.20083	0.219482	0.189296	0.219293	0.221829	0.185004	0.136317	0.196577	0.197921
0.197658	0.134655	0.198648	0.197193	0.187217	0.164953	0.200444	0.181234	0.200209	0.184601	0.158296	0.0853267	0.165426	0.0998902	0.196135	0.164004	0.157338	0.141665	0.209264	0.201259	0.20814	0.226508	0.209904	0.224967	0.224427	0.231686	0.198112	0.176833	0.196854	0.18441	0.183586	0.179497	0.20056	0.207062	0.205413	0.187641	0.21688	0.220956	0.20162	0.151246	0.200435	0.203967
0.191857	0.137214	0.188342	0.188232	0.199498	0.180193	0.211585	0.17691	0.19903	0.171894	0.156106	0.0651309	0.162773	0.0931256	0.20608	0.158814	0.171403	0.164564	0.203725	0.215776	0.203812	0.219531	0.210259	0.213244	0.216582	0.223353	0.190156	0.17501	0.19281	0.190052	0.201387	0.177816	0.204511	0.210817	0.207671	0.197031	0.209174	0.212	0.196882	0.149411	0.205833	0.203856
0.196297	0.145779	0.195086	0.19741	0.187189	0.173432	0.198155	0.186983	0.198886	0.187899	0.162073	0.0669802	0.165435	0.102855	0.196878	0.166658	0.17769	0.149935	0.20548	0.200744	0.212473	0.223477	0.206391	0.220272	0.232179	0.219259	0.195774	0.177223	0.188758	0.196173	0.19644	0.179392	0.207964	0.204178	0.204566	0.200478	0.214985	0.221055	0.195832	0.144471	0.193226	0.200261
0.192657	0.14551	0.178087	0.193989	0.185547	0.172255	0.189312	0.17375	0.195647	0.180455	0.159504	0.0827016	0.163047	0.0933711	0.197019	0.159593	0.171791	0.144784	0.201808	0.208326	0.206669	0.225919	0.215865	0.209172	0.211961	0.21543	0.191875	0.172797	0.191792	0.191471	0.196605	0.190335	0.209412	0.191695	0.198276	0.18915	0.213011	0.224439	0.190045	0.152852	0.212577	0.204612
0.200869	0.141473	0.199497	0.19335	0.19219	0.16685	0.201403	0.18127	0.204834	0.182246	0.162864	0.0732635	0.156618	0.0923826	0.198056	0.172581	0.167381	0.134764	0.20669	0.211518	0.214427	0.22229	0.215483	0.206207	0.23095	0.214155	0.197354	0.181348	0.195079	0.186406	0.196174	0.177756	0.200674	0.203801	0.2109	0.204449	0.222689	0.220388	0.184091	0.137495	0.203914	0.202695
0.194428	0.143038	0.187733	0.186374	0.191037	0.178083	0.202105	0.180486	0.196739	0.181615	0.162294	0.0788304	0.161518	0.1016	0.205286	0.170286	0.173147	0.149356	0.217618	0.213283	0.209509	0.239314	0.214375	0.219551	0.219725	0.235534	0.199121	0.180255	0.203085	0.194533	0.195001	0.175405	0.200174	0.204976	0.206316	0.187096	0.20968	0.211151	0.189716	0.140695	0.202284	0.211393
0.19849	0.14565	0.191466	0.189703	0.190661	0.176371	0.194531	0.185857	0.191221	0.173648	0.1456	0.0683984	0.146911	0.0945303	0.191146	0.156397	0.183681	0.147221	0.207791	0.208469	0.212395	0.225276	0.222195	0.21376	0.211729	0.223328	0.183207	0.17608	0.184957	0.188241	0.189302	0.179539	0.204733	0.187557	0.207665	0.204355	0.22226	0.207782	0.188774	0.147609	0.207978	0.198233
0.188161	0.140328	0.196187	0.197559	0.195844	0.181777	0.196233	0.179167	0.192963	0.172409	0.163177	0.0906795	0.158524	0.0981124	0.191052	0.170817	0.166444	0.147654	0.208249	0.213998	0.211361	0.223256	0.208146	0.215178	0.209603	0.223451	0.199275	0.180277	0.184421	0.189412	0.196446	0.175918	0.204688	0.204931	0.211034	0.200871	0.216351	0.22029	0.190949	0.147603	0.201639	0.208122
0.187431	0.149092	0.193875	0.18979	0.18986	0.170188	0.2027	0.182561	0.202858	0.192603	0.165759	0.0845693	0.169087	0.0909571	0.193105	0.168801	0.168213	0.143048	0.209528	0.193964	0.209329	0.232267	0.215235	0.213852	0.227897	0.213949	0.198621	0.177363	0.19853	0.187534	0.200766	0.17902	0.202926	0.200202	0.207865	0.19853	0.212042	0.214909	0.193947	0.14862	0.209679	0.198417
0.193787	0.135826	0.190877	0.196294	0.19749	0.165359	0.19857	0.183135	0.208603	0.182213	0.162029	0.0752429	0.158341	0.0941478	0.197606	0.157374	0.17784	0.146277	0.213336	0.203377	0.212964	0.227123	0.210641	0.219064	0.210162	0.219203	0.197792	0.175038	0.194364	0.185149	0.196421	0.188946	0.20486	0.194114	0.222762	0.205667	0.22654	0.212848	0.193137	0.147349	0.20767	0.193627
0.202614	0.142289	0.184968	0.193408	0.191685	0.175972	0.212055	0.178373	0.190695	0.180351	0.170764	0.0781334	0.160298	0.101168	0.196631	0.154203	0.160157	0.15323	0.205879	0.209454	0.203781	0.217183	0.209219	0.214193	0.221239	0.220851	0.18948	0.179339	0.196436	0.195285	0.196765	0.184633	0.211558	0.200321	0.199425	0.20418	0.216611	0.219825	0.196036	0.145796	0.203401	0.206501
0.189563	0.142073	0.195865	0.194433	0.19945	0.18142	0.207614	0.179174	0.201258	0.181319	0.159651	0.0750711	0.165565	0.094116	0.205343	0.167896	0.170792	0.147764	0.217296	0.196686	0.220593	0.230395	0.208504	0.210583	0.223532	0.2197	0.18164	0.181707	0.18698	0.189768	0.191667	0.187692	0.199614	0.200347	0.217369	0.19172	0.212817	0.221972	0.198893	0.132163	0.198638	0.199237
0.200956	0.151741	0.185804	0.189251	0.188841	0.180709	0.210561	0.182104	0.196067	0.181135	0.15873	0.0660292	0.169843	0.101835	0.197509	0.151578	0.183257	0.148676	0.208581	0.211537	0.215962	0.226506	0.204529	0.210922	0.228048	0.225789	0.183124	0.176652	0.198495	0.19616	0.201962	0.190418	0.202182	0.20203	0.216409	0.185602	0.219764	0.219491	0.179698	0.149179	0.20176	0.19397
0.202056	0.138552	0.187737	0.191467	0.194728	0.176317	0.204656	0.187034	0.193653	0.183263	0.171988	0.0736822	0.163915	0.0913476	0.194706	0.163223	0.164524	0.151778	0.203791	0.205013	0.211529	0.218447	0.22253	0.206924	0.216154	0.226105	0.192457	0.181486	0.189705	0.183419	0.203694	0.185083	0.207376	0.202102	0.200388	0.195834	0.221561	0.230829	0.197002	0.147332	0.202641	0.202996
0.195677	0.147623	0.191747	0.180627	0.18903	0.181467	0.209583	0.195	0.21092	0.179846	0.156985	0.0697785	0.158693	0.102554	0.205594	0.1496	0.17865	0.140511	0.206747	0.207942	0.212712	0.227378	0.220216	0.213831	0.219566	0.216647	0.189645	0.181283	0.187715	0.192904	0.186251	0.183301	0.209093	0.205485	0.204195	0.191036	0.211546	0.219906	0.191111	0.134679	0.206604	0.204131
0.189462	0.136082	0.188767	0.186086	0.191005	0.171838	0.205349	0.175499	0.192922	0.185943	0.164186	0.0739671	0.156876	0.0912455	0.199244	0.154422	0.173854	0.154303	0.210047	0.205774	0.213438	0.218819	0.205432	0.207301	0.211518	0.2271	0.189403	0.179434	0.180291	0.195441	0.203767	0.181786	0.205403	0.195545	0.213744	0.193682	0.222135	0.218695	0.193135	0.143181	0.212645	0.207844
0.189957	0.137416	0.193401	0.184656	0.193471	0.180236	0.200792	0.159022	0.207143	0.181605	0.153418	0.0734322	0.164281	0.109345	0.192991	0.16414	0.167845	0.141451	0.201334	0.210472	0.221654	0.229787	0.21448	0.205471	0.22551	0.217699	0.191334	0.194204	0.187618	0.189162	0.194809	0.185942	0.2043	0.204748	0.196583	0.204163	0.223838	0.212964	0.183657	0.139153	0.202357	0.205012
0.207007	0.136278	0.185566	0.180727	0.195826	0.178462	0.197622	0.172759	0.200294	0.18632	0.158997	0.0692568	0.172666	0.093148	0.19636	0.164419	0.169999	0.144517	0.208678	0.204445	0.213932	0.222151	0.216951	0.213036	0.219434	0.229664	0.196968	0.17851	0.188927	0.19469	0.191787	0.176333	0.20239	0.201176	0.213267	0.190486	0.2274	0.213705	0.189242	0.151006	0.191023	0.202216
0.190409	0.143348	0.197	0.189777	0.195615	0.178904	0.201961	0.185971	0.183038	0.185792	0.166314	0.0853232	0.171124	0.0892148	0.191725	0.165076	0.173551	0.156057	0.201229	0.209951	0.205382	0.22508	0.204283	0.214447	0.212521	0.228466	0.205144	0.176912	0.188326	0.19197	0.204578	0.178354	0.199916	0.210581	0.199999	0.191078	0.222199	0.222522	0.19825	0.138369	0.206073	0.202288
0.203413	0.148477	0.199106	0.202392	0.210317	0.1807	0.202733	0.166502	0.201296	0.177871	0.162035	0.0714044	0.158234	0.100198	0.195359	0.174271	0.172309	0.1472	0.210907	0.203878	0.223766	0.223858	0.224244	0.206591	0.22234	0.223897	0.198741	0.170358	0.198923	0.18638	0.20106	0.169377	0.203744	0.197392	0.208925	0.186965	0.208981	0.220249	0.189224	0.146182	0.204261	0.196045
0.200705	0.128445	0.186742	0.195825	0.188219	0.17137	0.207953	0.177523	0.198514	0.178767	0.163197	0.0797714	0.162904	0.0976898	0.199829	0.152149	0.164964	0.148193	0.204783	0.205589	0.215242	0.223291	0.211774	0.214965	0.214365	0.211269	0.197979	0.185654	0.18735	0.19347	0.19524	0.177606	0.213428	0.202384	0.198672	0.203562	0.219819	0.210715	0.182295	0.142564	0.195043	0.187244
0.19972	0.141861	0.189775	0.189134	0.197728	0.176888	0.211323	0.178501	0.193491	0.191985	0.159158	0.0673237	0.156913	0.115304	0.191889	0.172841	0.170869	0.149769	0.203805	0.210059	0.214343	0.22647	0.214093	0.209184	0.218476	0.219635	0.195997	0.181424	0.194286	0.189478	0.198825	0.182185	0.191445	0.194334	0.212184	0.191689	0.209257	0.224207	0.188464	0.137166	0.202706	0.202976
0.190299	0.140839	0.18788	0.191351	0.185343	0.182149	0.191057	0.172887	0.202389	0.18276	0.169696	0.0686109	0.175451	0.0929156	0.183319	0.169688	0.187304	0.147113	0.220509	0.201123	0.218356	0.214416	0.207089	0.202993	0.227227	0.222967	0.190382	0.170292	0.201586	0.188266	0.198629	0.168988	0.217108	0.196702	0.210622	0.192813	0.211943	0.212889	0.198224	0.141618	0.201088	0.20281
0.192748	0.134636	0.197245	0.186127	0.193084	0.174783	0.207992	0.17527	0.188194	0.176231	0.17141	0.0841769	0.173077	0.10507	0.198303	0.164593	0.17706	0.144292	0.209253	0.211819	0.208054	0.232434	0.22088	0.209556	0.221335	0.23722	0.193535	0.183201	0.188712	0.192967	0.194378	0.194128	0.209717	0.205105	0.202075	0.204228	0.218212	0.221672	0.188134	0.138203	0.190031	0.20348
0.207437	0.144921	0.194612	0.187558	0.183523	0.181991	0.201819	0.18448	0.195912	0.197177	0.160821	0.0821056	0.161306	0.0989967	0.200317	0.166251	0.183213	0.151093	0.199899	0.21276	0.209046	0.219181	0.216124	0.212495	0.222591	0.222223	0.189113	0.175789	0.195748	0.188871	0.196681	0.177777	0.193506	0.197344	0.203958	0.190654	0.22362	0.225209	0.18384	0.140553	0.195355	0.200491
0.198329	0.136985	0.191608	0.198407	0.193779	0.177035	0.201667	0.183975	0.205368	0.18165	0.163345	0.0697938	0.165611	0.108514	0.199477	0.178326	0.184049	0.156434	0.216045	0.207218	0.213504	0.229644	0.213919	0.207437	0.214474	0.216602	0.198207	0.185607	0.189828	0.191329	0.203888	0.187274	0.20762	0.19651	0.210486	0.194203	0.219563	0.218029	0.190913	0.155492	0.202665	0.192845
0.202423	0.13044	0.201157	0.176655	0.19841	0.18072	0.204881	0.169153	0.191413	0.192798	0.15859	0.0744941	0.165836	0.0972706	0.199021	0.168753	0.166766	0.144503	0.217126	0.197126	0.215868	0.224782	0.219258	0.211936	0.226379	0.221642	0.194479	0.171528	0.198874	0.20304	0.189677	0.190289	0.205586	0.202678	0.212449	0.196942	0.221039	0.214482	0.186837	0.148911	0.203527	0.207889
0.205748	0.137893	0.192048	0.184161	0.187846	0.179887	0.211144	0.174165	0.196249	0.184849	0.160318	0.0722544	0.160328	0.0978189	0.202164	0.166947	0.166218	0.145819	0.209662	0.20714	0.218606	0.230481	0.20386	0.216387	0.228488	0.217923	0.195151	0.18013	0.186172	0.180581	0.197318	0.171697	0.201288	0.19917	0.209801	0.189572	0.22381	0.212133	0.193246	0.14953	0.198912	0.200622
0.1825	0.148732	0.184241	0.190901	0.200366	0.167216	0.204182	0.191138	0.198092	0.182089	0.148279	0.0743122	0.163383	0.0806307	0.191853	0.16441	0.167372	0.145422	0.207517	0.197867	0.207035	0.228791	0.21005	0.211705	0.223432	0.228013	0.198517	0.180037	0.196773	0.184078	0.19899	0.185681	0.206224	0.202515	0.200037	0.197252	0.214953	0.224938	0.185592	0.142907	0.200949	0.198616
0.197209	0.143871	0.195767	0.19024	0.19391	0.171665	0.202645	0.176741	0.200361	0.183297	0.162181	0.0764928	0.164453	0.0970974	0.191555	0.154918	0.165325	0.155739	0.210837	0.196595	0.213695	0.219145	0.203101	0.22091	0.212603	0.227205	0.187409	0.183133	0.18701	0.195637	0.200606	0.17854	0.2033	0.209579	0.20843	0.196717	0.212082	0.227581	0.197209	0.146711	0.212598	0.204248
0.197285	0.138561	0.192176	0.181856	0.204003	0.170858	0.207736	0.174606	0.199301	0.175889	0.1612	0.070768	0.160831	0.0940061	0.200483	0.159481	0.180997	0.148223	0.204208	0.21078	0.217887	0.220288	0.205578	0.212357	0.221275	0.228355	0.197916	0.166593	0.176618	0.192343	0.199305	0.171065	0.193395	0.20183	0.206247	0.194581	0.212951	0.223526	0.193867	0.145634	0.200745	0.205308
0.194526	0.143642	0.189299	0.188498	0.192588	0.176114	0.215036	0.172672	0.185898	0.181658	0.163346	0.0748195	0.14726	0.0972458	0.189618	0.147807	0.161395	0.154783	0.206107	0.209607	0.209863	0.221314	0.204817	0.206653	0.213317	0.219577	0.187117	0.178265	0.191713	0.189679	0.200959	0.174591	0.202684	0.201463	0.199609	0.202243	0.224491	0.222178	0.199793	0.142891	0.203005	0.194537
0.189672	0.140357	0.193166	0.193539	0.201471	0.177341	0.20738	0.172572	0.192869	0.18742	0.15677	0.0723347	0.164053	0.10076	0.193166	0.15046	0.175459	0.151987	0.209159	0.207465	0.200202	0.225772	0.213645	0.218298	0.221754	0.223246	0.201319	0.174763	0.189566	0.190583	0.186052	0.187391	0.198906	0.202688	0.194061	0.204021	0.21032	0.21641	0.191306	0.138364	0.195606	0.20336
0.192625	0.127186	0.180781	0.177656	0.196525	0.18288	0.204622	0.185646	0.212652	0.182872	0.163478	0.0755321	0.167121	0.0937139	0.194499	0.168402	0.166435	0.147511	0.212363	0.215896	0.206776	0.22242	0.209353	0.206094	0.229598	0.22219	0.193245	0.1872	0.194052	0.186371	0.205306	0.181795	0.21227	0.197494	0.206104	0.189564	0.224078	0.213319	0.182287	0.137419	0.208331	0.192221
0.205151	0.141995	0.200364	0.190065	0.19864	0.181201	0.206196	0.177734	0.195743	0.191482	0.169233	0.0822616	0.160156	0.102973	0.196333	0.166266	0.160887	0.148347	0.203392	0.209067	0.22187	0.22742	0.216496	0.217557	0.219535	0.221259	0.185701	0.179085	0.189482	0.194797	0.199593	0.179497	0.199384	0.202944	0.200015	0.201393	0.217421	0.223204	0.182046	0.140627	0.20733	0.197208
0.18674	0.128525	0.185408	0.19627	0.192365	0.179181	0.193677	0.192688	0.206994	0.192337	0.15873	0.0709157	0.158448	0.093333	0.196547	0.160233	0.178044	0.150074	0.207708	0.209295	0.213775	0.226186	0.223527	0.20929	0.230955	0.221871	0.197933	0.187699	0.196167	0.180529	0.193252	0.193724	0.205479	0.200236	0.207279	0.190379	0.217401	0.217046	0.202188	0.145848	0.197083	0.202904
0.189935	0.145669	0.194284	0.177622	0.197095	0.176466	0.21074	0.171875	0.199478	0.190702	0.162301	0.0692835	0.163663	0.0898681	0.199672	0.169078	0.180955	0.146019	0.213928	0.204172	0.20847	0.21551	0.224385	0.219032	0.225916	0.218723	0.193739	0.175602	0.193692	0.188962	0.202533	0.179547	0.209048	0.213324	0.209944	0.190236	0.210948	0.221193	0.197188	0.146047	0.206928	0.205133
0.203866	0.141381	0.1984	0.195865	0.19748	0.176344	0.207003	0.166195	0.192948	0.187856	0.157426	0.0814294	0.166086	0.103735	0.199915	0.167336	0.173652	0.154725	0.20934	0.199669	0.215106	0.217117	0.214451	0.219532	0.225363	0.235287	0.191334	0.182068	0.200894	0.187467	0.199669	0.183766	0.209436	0.210892	0.206286	0.189836	0.224402	0.224079	0.200128	0.147554	0.210053	0.211078
0.192329	0.142032	0.180024	0.181476	0.191356	0.171065	0.211998	0.176339	0.197047	0.182401	0.168595	0.0678495	0.147041	0.110359	0.194934	0.151966	0.175355	0.143748	0.208585	0.211045	0.211815	0.229081	0.221951	0.218107	0.215777	0.217363	0.181943	0.181237	0.19637	0.18836	0.202421	0.17834	0.193594	0.20372	0.200928	0.202959	0.225187	0.221216	0.191165	0.141269	0.20182	0.202481
0.201442	0.134242	0.18517	0.193019	0.189927	0.183982	0.209246	0.178337	0.202296	0.176349	0.173537	0.0852512	0.16985	0.0939038	0.197961	0.15777	0.173767	0.149233	0.20898	0.203992	0.199724	0.216744	0.219318	0.209099	0.217075	0.227092	0.20455	0.181529	0.193751	0.199267	0.195984	0.189179	0.205502	0.20815	0.199869	0.184912	0.215097	0.215889	0.188462	0.141502	0.208733	0.189231
0.184402	0.138374	0.206173	0.192399	0.200447	0.175049	0.207392	0.171784	0.20426	0.186658	0.155965	0.0619882	0.164233	0.0908549	0.196179	0.160033	0.18118	0.156417	0.210351	0.201015	0.21158	0.216273	0.200719	0.219398	0.213859	0.221595	0.203373	0.16805	0.181798	0.196598	0.196536	0.179194	0.198419	0.199096	0.202372	0.194779	0.220384	0.214879	0.18775	0.13353	0.205046	0.202067
0.195011	0.140655	0.191583	0.19243	0.189992	0.176914	0.203821	0.186499	0.197752	0.193561	0.172917	0.0743969	0.170249	0.104299	0.200216	0.173857	0.163798	0.143478	0.201386	0.207767	0.212974	0.218188	0.203696	0.21861	0.244158	0.224944	0.1931	0.171964	0.192765	0.204115	0.196983	0.183521	0.207622	0.205086	0.198175	0.201325	0.202926	0.21992	0.193431	0.138172	0.197982	0.20008
0.198185	0.151636	0.191088	0.192898	0.196898	0.176218	0.198165	0.173254	0.205876	0.193056	0.1584	0.0754041	0.165855	0.0934799	0.198539	0.171132	0.162351	0.143807	0.216392	0.211667	0.202728	0.219118	0.213337	0.221541	0.221103	0.225512	0.186847	0.169279	0.188214	0.191768	0.192767	0.188141	0.201359	0.194256	0.204602	0.197359	0.218835	0.228302	0.19572	0.157367	0.212653	0.207217
0.184128	0.145514	0.203947	0.183049	0.196077	0.175288	0.208183	0.173273	0.192447	0.178196	0.148409	0.076388	0.165856	0.101448	0.205552	0.167611	0.168473	0.155639	0.21556	0.205394	0.210726	0.219483	0.209014	0.212001	0.228863	0.23112	0.185863	0.177222	0.200868	0.195424	0.199025	0.181122	0.204786	0.204092	0.215638	0.203907	0.224388	0.21331	0.19057	0.14596	0.212941	0.198961
0.195133	0.137797	0.187301	0.193818	0.194594	0.181212	0.196878	0.172052	0.196667	0.171515	0.15579	0.0778428	0.158179	0.102353	0.205044	0.155927	0.174607	0.148999	0.218037	0.201294	0.21552	0.229025	0.219109	0.204188	0.225433	0.218718	0.189311	0.178628	0.198471	0.186587	0.196154	0.184348	0.210241	0.208337	0.213379	0.195652	0.210079	0.220588	0.193809	0.142573	0.190539	0.206367
0.19074	0.142421	0.187543	0.188069	0.192674	0.186084	0.205967	0.178271	0.2	0.189175	0.146172	0.0761296	0.15844	0.0938307	0.204588	0.168838	0.175828	0.149811	0.208458	0.198112	0.213268	0.222264	0.21141	0.212938	0.21964	0.225029	0.185463	0.179139	0.197279	0.194538	0.202168	0.186906	0.203833	0.204043	0.212137	0.207482	0.215353	0.214686	0.186292	0.154786	0.197677	0.20982
0.195296	0.140228	0.188308	0.193677	0.19165	0.186465	0.206408	0.174783	0.211461	0.172431	0.159589	0.0756963	0.172718	0.0963816	0.197677	0.15957	0.171886	0.144393	0.218294	0.20258	0.203998	0.228406	0.2207	0.215505	0.224071	0.223361	0.190082	0.171864	0.188956	0.183764	0.20452	0.176819	0.207337	0.204555	0.198653	0.202344	0.232375	0.21857	0.188781	0.144937	0.206137	0.197087
0.195997	0.140332	0.193131	0.185861	0.190612	0.170033	0.209767	0.182721	0.197541	0.181867	0.167267	0.0722662	0.173543	0.0900102	0.193967	0.17117	0.164655	0.150781	0.211231	0.207648	0.215056	0.223108	0.204579	0.212745	0.217971	0.220611	0.196858	0.187114	0.193074	0.179323	0.200194	0.195629	0.206754	0.191572	0.204976	0.195305	0.220398	0.219131	0.196345	0.154811	0.205799	0.211596
0.191229	0.145783	0.197921	0.189452	0.193199	0.175443	0.203035	0.182004	0.197669	0.192535	0.161975	0.0896474	0.158986	0.106954	0.192758	0.173093	0.169763	0.140786	0.204835	0.204727	0.210286	0.22273	0.219485	0.223035	0.220396	0.2326	0.192936	0.180978	0.19556	0.180649	0.201898	0.192705	0.198711	0.207295	0.199484	0.192656	0.22459	0.218068	0.192197	0.142612	0.202528	0.20212
0.188494	0.141267	0.192675	0.180323	0.189376	0.170084	0.196929	0.173068	0.193029	0.175094	0.156439	0.080669	0.159694	0.102161	0.195373	0.161474	0.16856	0.150696	0.207263	0.198487	0.219025	0.224267	0.2202	0.207559	0.223087	0.229492	0.194102	0.177489	0.191508	0.185818	0.203452	0.17633	0.211441	0.201858	0.209736	0.197016	0.208421	0.211955	0.188085	0.144644	0.199697	0.208102
0.194234	0.148847	0.196627	0.189734	0.1875	0.163215	0.207628	0.179557	0.208869	0.197556	0.150685	0.0796031	0.162003	0.0853503	0.193832	0.16278	0.176186	0.144439	0.207979	0.202882	0.213553	0.233044	0.222135	0.211362	0.216626	0.22792	0.185946	0.17482	0.2034	0.192659	0.186579	0.177236	0.205468	0.197181	0.207417	0.191063	0.230898	0.223864	0.194702	0.147706	0.199862	0.202305
0.193948	0.145116	0.192288	0.185958	0.181648	0.179827	0.203005	0.169817	0.196153	0.190332	0.163099	0.0760842	0.15509	0.0990363	0.190054	0.148542	0.167726	0.149855	0.210683	0.208078	0.210823	0.220283	0.212599	0.203954	0.228579	0.226697	0.19629	0.182778	0.187858	0.186939	0.202315	0.179727	0.210814	0.19194	0.207408	0.195219	0.226608	0.219296	0.189037	0.149531	0.217997	0.189693
0.188252	0.143446	0.195677	0.188743	0.198031	0.194532	0.199634	0.179932	0.199054	0.186845	0.160721	0.0690109	0.162118	0.0878718	0.192789	0.16159	0.164985	0.146314	0.21476	0.210229	0.209592	0.222053	0.196527	0.207841	0.221775	0.234372	0.199134	0.188155	0.196043	0.194982	0.202501	0.191974	0.20508	0.194086	0.209067	0.200422	0.224226	0.221501	0.197003	0.144221	0.205418	0.199844
0.20048	0.146167	0.187249	0.183174	0.199885	0.180167	0.205364	0.181472	0.205632	0.186456	0.167318	0.0772373	0.155717	0.101771	0.200128	0.159426	0.165378	0.161297	0.211111	0.202694	0.209355	0.219095	0.220632	0.215241	0.211379	0.217399	0.188403	0.174747	0.186704	0.182211	0.203632	0.174611	0.202899	0.206864	0.208101	0.202802	0.216298	0.222164	0.189366	0.145201	0.20847	0.187044
0.18859	0.137728	0.18515	0.177276	0.195721	0.184614	0.195673	0.17805	0.197292	0.19606	0.15499	0.0686998	0.159176	0.0945033	0.19454	0.161746	0.177978	0.146063	0.20586	0.203855	0.213945	0.223975	0.212158	0.222816	0.214997	0.220583	0.194351	0.180657	0.200168	0.194279	0.190658	0.188317	0.210445	0.206133	0.203161	0.197415	0.220285	0.222138	0.195847	0.138754	0.198653	0.214749
0.185878	0.1401	0.189265	0.195167	0.199305	0.174815	0.208238	0.178917	0.188959	0.178293	0.151618	0.0747236	0.16446	0.0889166	0.191309	0.168098	0.181137	0.14957	0.201911	0.205109	0.205802	0.231924	0.221028	0.219087	0.226402	0.222849	0.188897	0.178347	0.196073	0.189007	0.192372	0.176962	0.198911	0.200297	0.219597	0.200492	0.213341	0.221765	0.188989	0.142037	0.208594	0.195391
0.197325	0.128444	0.18733	0.193625	0.194782	0.174227	0.203859	0.177219	0.192293	0.182834	0.158693	0.0779816	0.167125	0.0996311	0.200967	0.16901	0.176606	0.143238	0.211026	0.207666	0.214415	0.230784	0.212071	0.218757	0.216351	0.212535	0.191098	0.178065	0.191214	0.192708	0.194018	0.173312	0.202317	0.200009	0.207358	0.201411	0.2119	0.212145	0.1792	0.146235	0.207345	0.205758
0.195622	0.139816	0.193224	0.20107	0.200013	0.172879	0.209452	0.170622	0.201148	0.174743	0.167149	0.0878545	0.170535	0.0962083	0.201407	0.157277	0.171969	0.157459	0.210538	0.204317	0.209458	0.232401	0.214633	0.208058	0.225782	0.222817	0.183941	0.178395	0.200594	0.188726	0.195478	0.176467	0.208158	0.200945	0.197841	0.183806	0.220195	0.225908	0.199464	0.155967	0.197183	0.207494
0.201362	0.143251	0.188325	0.181636	0.188937	0.183199	0.209244	0.180226	0.193088	0.18387	0.164441	0.0745533	0.156514	0.0966447	0.191935	0.163621	0.181991	0.150745	0.197318	0.198666	0.20709	0.222283	0.220653	0.21271	0.225443	0.229174	0.191838	0.182268	0.187524	0.189888	0.190842	0.182513	0.202772	0.203621	0.200854	0.205412	0.220921	0.222115	0.192912	0.14603	0.209726	0.193314
0.191607	0.137331	0.198941	0.180595	0.18992	0.175661	0.194878	0.182465	0.197871	0.179946	0.1672	0.0789879	0.166108	0.0881476	0.200404	0.168762	0.172134	0.157764	0.205262	0.206022	0.207315	0.224169	0.211117	0.209096	0.228456	0.226197	0.185308	0.181027	0.201352	0.184257	0.193347	0.190728	0.198318	0.205101	0.197683	0.2031	0.212476	0.230117	0.182428	0.144261	0.198873	0.209602
0.203201	0.147359	0.183147	0.197898	0.188746	0.170797	0.212865	0.17555	0.209465	0.185873	0.150859	0.0676431	0.170447	0.0911594	0.188399	0.164573	0.1792	0.150847	0.203679	0.210054	0.216907	0.230029	0.209013	0.218092	0.217968	0.227844	0.198076	0.19147	0.191533	0.186887	0.20078	0.18021	0.204349	0.201233	0.209452	0.203915	0.227721	0.217626	0.199042	0.135752	0.202861	0.192358
0.201386	0.137932	0.194078	0.198731	0.191711	0.167714	0.205835	0.18242	0.202119	0.181443	0.164746	0.0879816	0.161286	0.103767	0.207424	0.177532	0.17282	0.147869	0.212069	0.210778	0.20206	0.223753	0.206713	0.21895	0.220279	0.224147	0.19604	0.192311	0.18291	0.204982	0.202413	0.173866	0.21018	0.202102	0.214466	0.195992	0.215872	0.217677	0.189248	0.144986	0.209921	0.1953
0.196669	0.142443	0.191898	0.189803	0.194897	0.176146	0.209057	0.17851	0.194268	0.179485	0.158754	0.0759336	0.161711	0.0880126	0.192426	0.169153	0.163409	0.155494	0.205193	0.206861	0.206106	0.229833	0.224952	0.206892	0.22197	0.213699	0.193967	0.177819	0.194091	0.193796	0.192522	0.190028	0.201175	0.204712	0.209042	0.189043	0.226754	0.216686	0.198457	0.138597	0.196565	0.197744
0.195322	0.147108	0.18809	0.182012	0.202442	0.174528	0.198578	0.183657	0.19849	0.187317	0.159222	0.071681	0.162564	0.10779	0.203937	0.16552	0.166672	0.149046	0.204621	0.203696	0.211414	0.2253	0.210086	0.22181	0.228662	0.218084	0.186557	0.169042	0.199206	0.191756	0.200342	0.193475	0.203659	0.204477	0.207312	0.196799	0.224707	0.227599	0.190175	0.148947	0.201175	0.196812
0.199267	0.130161	0.185162	0.187182	0.196705	0.176081	0.200951	0.174515	0.203875	0.192921	0.161502	0.0828594	0.160315	0.10027	0.188738	0.155306	0.177549	0.145813	0.21161	0.212127	0.218263	0.224295	0.224421	0.204578	0.217007	0.223551	0.190385	0.17344	0.187293	0.188464	0.191427	0.189379	0.200643	0.204926	0.200962	0.194478	0.221631	0.219001	0.194675	0.144513	0.201495	0.19795
0.202087	0.141275	0.198793	0.182361	0.20335	0.1751	0.207736	0.179833	0.199824	0.188758	0.16001	0.0802746	0.155921	0.093835	0.194706	0.165418	0.180251	0.134423	0.207291	0.212445	0.221298	0.225979	0.207408	0.206744	0.220128	0.232022	0.187024	0.182365	0.185841	0.19187	0.195913	0.183574	0.202197	0.197317	0.20663	0.19609	0.220807	0.224512	0.17895	0.147546	0.200708	0.202857
0.205786	0.140795	0.186308	0.18535	0.196474	0.171134	0.199315	0.182038	0.199958	0.196807	0.170739	0.0729017	0.159791	0.0947485	0.191192	0.172821	0.163852	0.1545	0.207237	0.203358	0.217224	0.23069	0.210972	0.207116	0.227893	0.236356	0.208709	0.181185	0.194834	0.195029	0.19309	0.182367	0.207377	0.195362	0.213825	0.204402	0.22104	0.225165	0.17974	0.144543	0.215025	0.192188
0.188822	0.141915	0.193752	0.189375	0.199514	0.172894	0.195618	0.176041	0.18822	0.183813	0.163298	0.0809516	0.159492	0.105383	0.191027	0.168239	0.169912	0.15483	0.207589	0.207327	0.214622	0.226072	0.209996	0.215916	0.220281	0.223792	0.186873	0.180607	0.19611	0.195193	0.201254	0.184633	0.198079	0.201985	0.20024	0.192607	0.222471	0.221961	0.193565	0.138921	0.199813	0.195885
0.187928	0.148786	0.185505	0.181601	0.203437	0.179309	0.21055	0.175821	0.190807	0.183813	0.163896	0.0820043	0.167201	0.0965546	0.200312	0.161801	0.172913	0.147448	0.208511	0.197857	0.210344	0.223108	0.203451	0.215305	0.220085	0.210717	0.193133	0.175303	0.196033	0.187159	0.210316	0.183918	0.206365	0.201001	0.203823	0.202521	0.220419	0.225209	0.192559	0.147516	0.20644	0.199144
0.199788	0.136038	0.192179	0.182699	0.199367	0.172747	0.202765	0.19001	0.198007	0.185987	0.160784	0.0797231	0.16012	0.098889	0.19711	0.161516	0.181384	0.143401	0.205964	0.203121	0.219242	0.224687	0.216024	0.216788	0.220726	0.221103	0.194327	0.170668	0.195147	0.191239	0.197987	0.184054	0.202389	0.207313	0.197177	0.192057	0.21107	0.219724	0.189299	0.141432	0.205862	0.20764
0.195834	0.139689	0.181167	0.18522	0.19528	0.177016	0.212055	0.182137	0.202093	0.191809	0.159258	0.0814145	0.163506	0.0963504	0.202374	0.173804	0.182379	0.149271	0.204666	0.196431	0.215796	0.225192	0.217528	0.210642	0.219229	0.231729	0.201741	0.178734	0.195266	0.178251	0.194428	0.181636	0.21122	0.211207	0.199489	0.205111	0.221168	0.216725	0.185401	0.138358	0.206711	0.212133
0.189694	0.132847	0.192253	0.182895	0.188575	0.186202	0.214745	0.173943	0.196461	0.188685	0.169877	0.0768852	0.162917	0.0944683	0.189089	0.162621	0.161425	0.155302	0.212631	0.193942	0.216381	0.227706	0.215225	0.212131	0.224354	0.218145	0.187372	0.173571	0.193099	0.190913	0.199023	0.174605	0.206581	0.20466	0.206374	0.202979	0.228052	0.210712	0.188003	0.140195	0.19675	0.198481
0.196889	0.13869	0.184813	0.184058	0.19609	0.168281	0.202818	0.175496	0.198751	0.184388	0.165785	0.0769147	0.164038	0.0993858	0.193967	0.171222	0.174071	0.152855	0.214405	0.207027	0.206241	0.213396	0.211792	0.210928	0.219371	0.22569	0.19095	0.182954	0.191409	0.190246	0.193467	0.177105	0.215431	0.200354	0.211196	0.180169	0.225436	0.220443	0.191227	0.148161	0.192753	0.2042
0.200805	0.134157	0.201475	0.188448	0.189856	0.179039	0.206804	0.181501	0.192779	0.177658	0.162482	0.0789787	0.165048	0.0983325	0.189283	0.171923	0.170721	0.146407	0.207583	0.213662	0.19888	0.231965	0.219805	0.219808	0.216493	0.222247	0.197252	0.182589	0.186012	0.195509	0.19889	0.1783	0.206103	0.202241	0.205304	0.201025	0.222017	0.217967	0.182969	0.150831	0.210706	0.199987
0.195656	0.142683	0.181083	0.18839	0.201448	0.172431	0.204668	0.187125	0.191183	0.178386	0.166111	0.0764549	0.165111	0.100868	0.196938	0.164181	0.164913	0.145699	0.217688	0.205428	0.209329	0.219599	0.212452	0.207967	0.222627	0.216899	0.193247	0.176787	0.191852	0.182506	0.197105	0.18127	0.201361	0.200587	0.197135	0.193091	0.217084	0.220211	0.186634	0.14233	0.195574	0.193373
0.192731	0.146799	0.19296	0.193052	0.18455	0.169594	0.202674	0.18113	0.199476	0.177024	0.153256	0.0769734	0.161572	0.0917579	0.20467	0.157265	0.173399	0.139203	0.20709	0.204197	0.213199	0.220308	0.205601	0.226416	0.222244	0.22955	0.190182	0.179713	0.194321	0.18176	0.19469	0.173227	0.209147	0.202416	0.214288	0.193092	0.214287	0.222768	0.192948	0.139728	0.199158	0.196715
0.196811	0.146312	0.192425	0.193618	0.200307	0.18575	0.209607	0.186901	0.198203	0.174161	0.158968	0.0747218	0.164949	0.10025	0.202579	0.171696	0.174592	0.152346	0.19944	0.204987	0.211923	0.222143	0.215965	0.219315	0.217644	0.218494	0.191478	0.190099	0.187405	0.194566	0.198775	0.186542	0.20639	0.194003	0.208775	0.194508	0.223027	0.216783	0.186852	0.139008	0.204172	0.200246
0.197684	0.137921	0.19934	0.18667	0.196777	0.17181	0.211025	0.184697	0.191107	0.178354	0.162889	0.0827996	0.164479	0.0976737	0.197563	0.15525	0.173345	0.138124	0.214966	0.200831	0.215995	0.227249	0.227367	0.208836	0.21672	0.216797	0.194509	0.172771	0.191338	0.192834	0.197068	0.183675	0.19886	0.196625	0.200021	0.201423	0.22948	0.22548	0.188024	0.151293	0.198039	0.202964
0.200832	0.142508	0.176852	0.188827	0.190881	0.173299	0.202479	0.171803	0.194299	0.182994	0.160542	0.0730478	0.159976	0.102552	0.201355	0.169562	0.16635	0.14593	0.215035	0.215171	0.211904	0.21938	0.223447	0.211937	0.222507	0.208923	0.188854	0.179227	0.189534	0.190214	0.184736	0.171278	0.202848	0.195812	0.195142	0.195231	0.223638	0.222046	0.187827	0.147044	0.201609	0.196189
0.199685	0.145713	0.199144	0.184441	0.186816	0.18363	0.201972	0.179289	0.202226	0.184774	0.161215	0.0770531	0.159284	0.0952851	0.194522	0.163884	0.169977	0.147487	0.214523	0.202072	0.214968	0.230266	0.216338	0.217002	0.230578	0.222205	0.192285	0.177937	0.197706	0.198085	0.183944	0.192125	0.198243	0.196169	0.20806	0.194987	0.220393	0.224215	0.181513	0.142748	0.211621	0.209637
0.19292	0.13213	0.18856	0.176811	0.19586	0.17986	0.210411	0.178458	0.19448	0.198907	0.172713	0.080983	0.15335	0.0972693	0.201491	0.16312	0.175595	0.155909	0.216699	0.211339	0.208549	0.222855	0.209233	0.215154	0.223894	0.21711	0.195241	0.179095	0.187893	0.187868	0.201212	0.176007	0.208808	0.197137	0.209586	0.1959	0.223256	0.234434	0.189213	0.154717	0.208912	0.201253
0.196982	0.150444	0.185691	0.198321	0.191368	0.178126	0.202264	0.175996	0.187222	0.192091	0.166862	0.073529	0.161377	0.0950876	0.194775	0.175897	0.163469	0.149841	0.20603	0.210691	0.204675	0.229002	0.216633	0.209761	0.217989	0.218491	0.192028	0.17334	0.185439	0.187235	0.203514	0.187129	0.202259	0.208982	0.213411	0.195986	0.225531	0.220905	0.190928	0.133995	0.209347	0.214684
0.200165	0.141744	0.182536	0.191763	0.184613	0.172414	0.198521	0.170238	0.196893	0.189213	0.149157	0.0760515	0.157586	0.0964012	0.203682	0.162354	0.167673	0.141838	0.203693	0.207269	0.218444	0.231427	0.207026	0.205012	0.221318	0.22758	0.201764	0.183182	0.188584	0.194606	0.193777	0.171021	0.199576	0.197914	0.204257	0.202458	0.227059	0.215131	0.19922	0.151029	0.20027	0.202672
0.194851	0.143464	0.203559	0.191434	0.191925	0.178995	0.207249	0.169265	0.204225	0.187653	0.155074	0.0816152	0.159053	0.0993984	0.203123	0.174435	0.174395	0.142159	0.208854	0.202525	0.220566	0.219348	0.217094	0.214915	0.218184	0.222684	0.192243	0.177951	0.194889	0.176703	0.196766	0.181432	0.195964	0.208433	0.204089	0.191408	0.214303	0.209587	0.195292	0.143146	0.208174	0.212118
0.197635	0.135823	0.192631	0.182054	0.193357	0.174307	0.201111	0.17516	0.202899	0.188685	0.170494	0.0746627	0.168755	0.097035	0.196298	0.158359	0.172745	0.15224	0.210548	0.204918	0.212962	0.227034	0.221981	0.214295	0.22239	0.226044	0.19698	0.18607	0.187153	0.183374	0.186647	0.183481	0.210355	0.201777	0.200891	0.194168	0.224405	0.222979	0.194445	0.135157	0.200458	0.20696
0.193561	0.130364	0.196664	0.186049	0.197691	0.182405	0.203766	0.166225	0.196211	0.17227	0.157179	0.0700789	0.163045	0.102716	0.200237	0.170551	0.179814	0.149147	0.212002	0.209306	0.201608	0.232896	0.205392	0.214393	0.219475	0.217169	0.197327	0.172724	0.184932	0.187681	0.1883	0.179523	0.200734	0.202229	0.211787	0.200385	0.217468	0.225132	0.194354	0.139071	0.208955	0.201488
0.193899	0.144455	0.190802	0.181185	0.204399	0.170037	0.199546	0.16538	0.192061	0.179589	0.170034	0.0744695	0.159203	0.0948678	0.18278	0.169809	0.179963	0.147667	0.21078	0.205244	0.220648	0.220986	0.220175	0.208187	0.223308	0.230879	0.196054	0.182394	0.190507	0.182011	0.192225	0.1799	0.210272	0.209345	0.200244	0.189207	0.228874	0.22081	0.197198	0.131512	0.201981	0.209053
0.200158	0.135067	0.192182	0.189462	0.185887	0.18296	0.202243	0.18279	0.204905	0.17865	0.156232	0.0789312	0.16469	0.0996973	0.200891	0.168412	0.173552	0.148048	0.2002	0.212079	0.212267	0.210568	0.212212	0.210854	0.222916	0.224602	0.195085	0.186667	0.190516	0.190039	0.189809	0.182275	0.208588	0.21005	0.206767	0.194773	0.221392	0.230223	0.196381	0.14454	0.206579	0.193743
0.195347	0.139232	0.178901	0.194814	0.197231	0.188055	0.20105	0.186829	0.206634	0.181544	0.167288	0.0769293	0.163712	0.102845	0.201081	0.171108	0.183784	0.140237	0.209236	0.204769	0.207607	0.2241	0.212093	0.201988	0.226703	0.214452	0.198132	0.172566	0.19061	0.179139	0.19793	0.195404	0.202687	0.218368	0.206868	0.19842	0.218092	0.218336	0.195897	0.146155	0.20391	0.199953
0.204321	0.140424	0.196062	0.18522	0.187969	0.169008	0.19957	0.172404	0.197637	0.188477	0.166888	0.0741046	0.162922	0.103225	0.206631	0.163501	0.181738	0.138217	0.210555	0.216814	0.208579	0.228702	0.209452	0.211576	0.226601	0.211413	0.187409	0.183254	0.195858	0.193284	0.196738	0.183071	0.211509	0.195308	0.198582	0.192232	0.221826	0.214056	0.198005	0.148163	0.213637	0.202638
0.193813	0.131564	0.188747	0.194973	0.187812	0.177448	0.206709	0.179024	0.203699	0.195091	0.164515	0.0786222	0.160615	0.0946265	0.199479	0.147893	0.169904	0.14328	0.212769	0.210362	0.217206	0.225335	0.210387	0.20557	0.222044	0.224552	0.186844	0.17337	0.187386	0.193581	0.196686	0.186133	0.204664	0.209127	0.208907	0.196215	0.214309	0.220612	0.18481	0.146444	0.207131	0.193176
0.19237	0.149274	0.183395	0.190363	0.190183	0.175149	0.20284	0.178437	0.193377	0.18987	0.157331	0.0753927	0.165613	0.086811	0.187034	0.167397	0.180919	0.145757	0.213428	0.212406	0.212795	0.224383	0.215141	0.215301	0.227647	0.217694	0.200633	0.181182	0.200046	0.183592	0.19183	0.186476	0.202041	0.193265	0.208181	0.194457	0.213556	0.220198	0.200107	0.140403	0.189143	0.204948
0.196062	0.145894	0.187566	0.187429	0.198767	0.17906	0.205619	0.178283	0.212094	0.190225	0.147198	0.0813775	0.16975	0.10535	0.197546	0.17068	0.180418	0.140055	0.213614	0.212588	0.211071	0.222742	0.214239	0.215843	0.229828	0.225518	0.205133	0.172205	0.196129	0.191875	0.194691	0.193007	0.205472	0.210481	0.221084	0.189618	0.216016	0.221817	0.18364	0.144888	0.202494	0.195064
0.193987	0.132459	0.192857	0.188205	0.192295	0.16933	0.201484	0.181026	0.192549	0.189925	0.154694	0.0786889	0.167524	0.0892572	0.20104	0.163909	0.17854	0.150805	0.205785	0.215947	0.218575	0.219926	0.220085	0.213629	0.225056	0.222274	0.195038	0.178257	0.191955	0.183754	0.191086	0.183341	0.20661	0.205303	0.214281	0.205725	0.224951	0.212693	0.18622	0.140477	0.208954	0.202091
0.202775	0.144575	0.179385	0.194454	0.189113	0.174359	0.206259	0.181088	0.201078	0.191713	0.170477	0.0736364	0.160612	0.106697	0.200479	0.153141	0.173158	0.149397	0.201483	0.199443	0.210495	0.233827	0.213721	0.222024	0.219565	0.222938	0.188195	0.185971	0.188946	0.181636	0.200774	0.177443	0.194085	0.196589	0.204982	0.196421	0.215454	0.223276	0.194881	0.133976	0.204577	0.204585
0.198737	0.140773	0.192808	0.197363	0.193699	0.18309	0.199742	0.183221	0.19586	0.17887	0.159095	0.0697791	0.167809	0.0997895	0.192388	0.160541	0.172351	0.160124	0.197796	0.202702	0.217671	0.226567	0.216529	0.200338	0.223093	0.222236	0.206918	0.172011	0.191055	0.192032	0.200411	0.178649	0.210063	0.201486	0.21742	0.195438	0.213863	0.219973	0.193593	0.147771	0.199671	0.201425
0.204095	0.141607	0.190345	0.193809	0.193041	0.177985	0.196638	0.177594	0.19879	0.174745	0.158283	0.0645181	0.154553	0.0972973	0.196585	0.168694	0.16526	0.14028	0.208315	0.199829	0.220487	0.227528	0.216907	0.212132	0.211046	0.217551	0.200999	0.172647	0.191155	0.186538	0.189241	0.17579	0.193393	0.197157	0.208783	0.194314	0.210612	0.216524	0.197081	0.145965	0.199022	0.209608
0.202931	0.134573	0.199974	0.191708	0.191274	0.168591	0.204072	0.182134	0.20105	0.178313	0.156902	0.0823697	0.164704	0.101705	0.197485	0.175885	0.165014	0.140952	0.214689	0.199794	0.202151	0.223817	0.210467	0.209273	0.211483	0.220833	0.206167	0.176325	0.201709	0.195084	0.200113	0.175269	0.197294	0.198671	0.20863	0.192558	0.224116	0.221132	0.193137	0.153627	0.196995	0.201947
0.201479	0.139727	0.188198	0.188787	0.195326	0.179009	0.206221	0.184207	0.208016	0.180885	0.166485	0.0675532	0.17321	0.0979523	0.192251	0.159266	0.175854	0.142842	0.211436	0.205544	0.219741	0.22425	0.211283	0.219044	0.21616	0.22739	0.19358	0.177484	0.185416	0.197807	0.198071	0.176284	0.199849	0.205888	0.20569	0.197723	0.213663	0.215102	0.190611	0.134205	0.202753	0.2025
0.199132	0.136033	0.198715	0.191014	0.198363	0.175728	0.197427	0.173521	0.194813	0.175956	0.15792	0.0724339	0.167482	0.0863624	0.197071	0.160672	0.169168	0.142591	0.215968	0.206975	0.204436	0.228923	0.218508	0.209035	0.224603	0.218859	0.185384	0.180672	0.192608	0.183481	0.195656	0.175686	0.207637	0.20368	0.212808	0.198632	0.210218	0.218246	0.188748	0.146079	0.203622	0.204961
0.185631	0.142287	0.196823	0.187935	0.196941	0.175955	0.211652	0.183624	0.197257	0.192292	0.167961	0.0727566	0.171758	0.105464	0.194832	0.165028	0.176538	0.150623	0.209727	0.199035	0.215999	0.224037	0.209505	0.214773	0.218052	0.229645	0.192369	0.182884	0.198343	0.193	0.196374	0.183101	0.211777	0.197692	0.217216	0.195913	0.216713	0.223066	0.185818	0.142112	0.210231	0.200451
0.190489	0.141352	0.194443	0.183952	0.206211	0.168654	0.212535	0.18281	0.188886	0.186569	0.151763	0.0886979	0.166414	0.0923839	0.195065	0.170206	0.171448	0.159031	0.213739	0.212072	0.21458	0.227316	0.212086	0.212199	0.218058	0.224044	0.196102	0.175739	0.183205	0.193055	0.204812	0.170431	0.202059	0.194395	0.208368	0.197389	0.214134	0.208496	0.207834	0.136713	0.190972	0.197933
0.192962	0.129734	0.193267	0.186789	0.199867	0.159563	0.205106	0.173949	0.210761	0.183965	0.153215	0.0784453	0.164856	0.101518	0.187881	0.175323	0.159964	0.135274	0.208866	0.207431	0.205218	0.215343	0.206866	0.211348	0.23501	0.222144	0.200909	0.188586	0.197068	0.190247	0.197638	0.181648	0.196976	0.201359	0.204611	0.203345	0.217162	0.217259	0.19735	0.151945	0.197394	0.188265
0.194699	0.146881	0.192609	0.17836	0.199442	0.161292	0.214228	0.177399	0.194372	0.177466	0.166896	0.0786138	0.156288	0.103029	0.198751	0.165007	0.165339	0.151394	0.217191	0.208063	0.213492	0.229147	0.219679	0.219801	0.221396	0.218535	0.200396	0.1844	0.195863	0.194973	0.197197	0.19476	0.209789	0.192842	0.204407	0.195964	0.223377	0.225198	0.193396	0.135625	0.215661	0.199865
0.19495	0.141107	0.19667	0.189076	0.196489	0.180582	0.214327	0.187825	0.200488	0.191404	0.172946	0.0708669	0.171434	0.0883735	0.192423	0.158455	0.173371	0.150621	0.223724	0.208649	0.210864	0.225635	0.2191	0.215693	0.217588	0.221125	0.194932	0.178032	0.185655	0.204909	0.199347	0.180911	0.206833	0.207643	0.206245	0.198377	0.218527	0.210786	0.18532	0.137398	0.201011	0.211034
0.187627	0.14159	0.195828	0.184517	0.210071	0.170088	0.194345	0.177045	0.202945	0.185063	0.155511	0.0698731	0.154855	0.0989924	0.188231	0.172286	0.177791	0.158304	0.209749	0.20995	0.207832	0.229281	0.213554	0.217788	0.225488	0.231332	0.188135	0.194509	0.190664	0.189207	0.18095	0.167036	0.204953	0.200244	0.207051	0.192708	0.215787	0.216187	0.185051	0.130297	0.198612	0.207647
0.202776	0.142902	0.189653	0.178355	0.194543	0.169236	0.198984	0.183646	0.202779	0.184137	0.164477	0.0743881	0.165516	0.100647	0.196427	0.176346	0.17733	0.138942	0.208179	0.205134	0.215513	0.225858	0.217088	0.219654	0.216603	0.221063	0.199264	0.175082	0.187463	0.199057	0.197971	0.180349	0.203734	0.205789	0.197292	0.196969	0.21812	0.218789	0.190021	0.152254	0.200533	0.196227
0.197205	0.137375	0.184981	0.186043	0.189412	0.170338	0.19761	0.183152	0.201136	0.185762	0.165075	0.0681864	0.167667	0.100652	0.194838	0.162779	0.174321	0.149395	0.208947	0.206119	0.212139	0.224648	0.211999	0.210183	0.216025	0.216944	0.190228	0.175299	0.196057	0.188074	0.207711	0.18142	0.200687	0.204684	0.205125	0.187206	0.219079	0.221729	0.188501	0.146481	0.200299	0.204613
0.191477	0.139398	0.196033	0.195796	0.193827	0.180326	0.205942	0.171752	0.201618	0.173986	0.163583	0.072472	0.168191	0.0928453	0.204431	0.160412	0.180414	0.155499	0.210164	0.202604	0.214698	0.23236	0.215417	0.214717	0.220612	0.21991	0.189417	0.168974	0.190435	0.188449	0.200745	0.174462	0.18684	0.198671	0.207967	0.1859	0.216158	0.217739	0.185805	0.144069	0.207651	0.210405
0.191461	0.127311	0.194821	0.184385	0.208163	0.173975	0.1921	0.171622	0.200157	0.180356	0.160243	0.0705675	0.167916	0.0874457	0.194967	0.160117	0.167857	0.143409	0.205072	0.198605	0.222234	0.226391	0.20775	0.20608	0.210761	0.229329	0.194983	0.179351	0.195835	0.187032	0.189715	0.189082	0.195772	0.205158	0.199216	0.209946	0.202079	0.225553	0.201347	0.142259	0.202622	0.207274
0.196991	0.138736	0.197061	0.186269	0.191544	0.180803	0.209911	0.184102	0.206975	0.186182	0.16166	0.0767904	0.162804	0.0986378	0.205446	0.148704	0.167645	0.148696	0.220113	0.200931	0.209748	0.227079	0.208759	0.199842	0.214497	0.219881	0.192263	0.1776	0.186886	0.200756	0.204049	0.189238	0.199882	0.200201	0.199418	0.198322	0.215148	0.21159	0.186156	0.154233	0.207531	0.207994
0.202019	0.13617	0.191639	0.181718	0.197001	0.177618	0.214486	0.187885	0.188273	0.184937	0.160885	0.0816879	0.170768	0.101989	0.1925	0.150593	0.177852	0.154198	0.212879	0.210564	0.213973	0.225247	0.197211	0.215661	0.219023	0.219781	0.202214	0.177188	0.19098	0.184571	0.190776	0.1722	0.200772	0.191401	0.212369	0.206832	0.223586	0.221424	0.185662	0.137768	0.199191	0.197273
0.213073	0.142562	0.194208	0.196901	0.199167	0.169137	0.199904	0.176679	0.199378	0.186796	0.157221	0.0796445	0.171029	0.103425	0.195579	0.165363	0.175108	0.155464	0.206684	0.2092	0.214237	0.217903	0.215407	0.210784	0.222652	0.22369	0.190567	0.179607	0.191309	0.187933	0.190248	0.180437	0.20819	0.193834	0.206176	0.194194	0.22842	0.213682	0.187076	0.155388	0.205981	0.210618
0.205491	0.148749	0.182962	0.199863	0.188681	0.179318	0.208282	0.184437	0.190696	0.178931	0.159473	0.0735729	0.163938	0.0916438	0.196451	0.168999	0.174944	0.13926	0.206503	0.209956	0.213951	0.22648	0.210749	0.206084	0.226924	0.226144	0.205248	0.184076	0.189715	0.18293	0.20249	0.194921	0.210399	0.206262	0.20513	0.215387	0.225749	0.210581	0.190439	0.132017	0.213446	0.204341
0.197742	0.143503	0.184721	0.186523	0.202573	0.175195	0.202955	0.182479	0.186276	0.183205	0.156187	0.0723923	0.159524	0.0895588	0.200606	0.167453	0.17981	0.135087	0.220841	0.206297	0.215518	0.229082	0.213861	0.199544	0.220297	0.23018	0.203093	0.182534	0.179144	0.19358	0.199177	0.180248	0.204828	0.197724	0.210352	0.193433	0.220412	0.216497	0.187525	0.136493	0.200462	0.210516
0.184198	0.14374	0.187469	0.188049	0.199292	0.16883	0.206043	0.182279	0.206811	0.179911	0.167796	0.0766661	0.165224	0.0981387	0.207649	0.16967	0.176007	0.146358	0.209946	0.194053	0.216649	0.217916	0.21788	0.198887	0.221681	0.218059	0.194031	0.177424	0.191902	0.196373	0.198839	0.177447	0.210279	0.179225	0.203918	0.186855	0.21611	0.213865	0.195893	0.142076	0.206038	0.205173
0.175389	0.143383	0.192693	0.18428	0.185908	0.178673	0.204152	0.190929	0.19858	0.188529	0.162721	0.075082	0.159207	0.0945432	0.201415	0.158334	0.173664	0.133598	0.217214	0.20915	0.219762	0.22256	0.212516	0.206388	0.218392	0.228184	0.186476	0.181096	0.188597	0.185655	0.189585	0.19094	0.205984	0.200256	0.207669	0.18135	0.214078	0.219133	0.180708	0.145832	0.19913	0.20755
0.200375	0.159431	0.182453	0.183957	0.194499	0.179854	0.215142	0.182548	0.195991	0.183764	0.163832	0.079019	0.15961	0.0970425	0.191107	0.174123	0.185419	0.144679	0.210247	0.206428	0.212642	0.233418	0.205733	0.216597	0.216495	0.227251	0.202518	0.173573	0.184687	0.184722	0.188827	0.168497	0.21263	0.205669	0.207641	0.202304	0.213426	0.212892	0.187607	0.1342	0.216938	0.193641
0.187569	0.131493	0.187678	0.189182	0.191006	0.174407	0.209575	0.180301	0.201489	0.198196	0.166072	0.0794415	0.167293	0.0998395	0.19426	0.148984	0.176713	0.144688	0.215581	0.205713	0.214262	0.231274	0.212116	0.219286	0.216875	0.23048	0.197502	0.17885	0.194918	0.189088	0.203763	0.181804	0.199264	0.213434	0.197451	0.196166	0.220199	0.22847	0.189058	0.136876	0.206094	0.196716
0.186559	0.13529	0.19814	0.192392	0.189733	0.17422	0.19193	0.186729	0.198001	0.191741	0.1671	0.0760842	0.161802	0.0958211	0.21442	0.158573	0.180925	0.150502	0.209988	0.198904	0.207372	0.228366	0.216544	0.206263	0.223781	0.220015	0.194053	0.171132	0.192372	0.190644	0.194278	0.182361	0.200336	0.193899	0.207205	0.204984	0.21489	0.216441	0.192701	0.144756	0.211306	0.201402
0.199008	0.151184	0.190924	0.183782	0.194492	0.178359	0.20595	0.177545	0.19978	0.186941	0.157623	0.0719936	0.165047	0.0894493	0.197117	0.164975	0.174916	0.14618	0.213054	0.207292	0.199366	0.218512	0.212912	0.22134	0.215008	0.22244	0.199928	0.170163	0.194913	0.191358	0.192062	0.180506	0.210671	0.203453	0.202065	0.197446	0.223784	0.230503	0.180887	0.136374	0.194114	0.19764
0.188233	0.142139	0.196134	0.186131	0.190157	0.183373	0.198055	0.185511	0.194833	0.19203	0.162248	0.0698208	0.154253	0.0922558	0.196686	0.161758	0.174507	0.14545	0.213481	0.206606	0.210883	0.225806	0.210031	0.211795	0.228497	0.226602	0.190792	0.180073	0.195238	0.190153	0.199852	0.185218	0.200778	0.203362	0.203876	0.205023	0.219667	0.209177	0.196474	0.143087	0.207355	0.199901
0.193923	0.142386	0.184397	0.181143	0.19026	0.175394	0.205079	0.178278	0.193834	0.185384	0.163474	0.0793716	0.1576	0.101694	0.199733	0.159847	0.172639	0.153151	0.212362	0.218352	0.221228	0.230581	0.216992	0.205709	0.226144	0.226343	0.190696	0.173098	0.188836	0.193707	0.201095	0.184369	0.208702	0.205429	0.212907	0.201314	0.216353	0.213473	0.198776	0.140735	0.208127	0.203681
0.196496	0.140756	0.199489	0.177656	0.197195	0.177414	0.208309	0.170163	0.196736	0.190109	0.161675	0.0859467	0.164883	0.0937637	0.197013	0.159853	0.179085	0.14451	0.21008	0.202555	0.208417	0.233675	0.218996	0.200461	0.212774	0.224335	0.199977	0.168887	0.19269	0.187486	0.196623	0.170684	0.209909	0.200645	0.213451	0.203364	0.20705	0.221174	0.192619	0.144133	0.203797	0.19568
0.1961	0.139553	0.191832	0.187327	0.192814	0.18614	0.20743	0.185558	0.190731	0.182183	0.163009	0.0812464	0.162541	0.0873422	0.201529	0.159769	0.168366	0.16136	0.210533	0.212306	0.209139	0.221375	0.222228	0.226027	0.22679	0.219437	0.192934	0.176782	0.197091	0.179373	0.191947	0.167476	0.202559	0.201948	0.204082	0.200957	0.215731	0.22359	0.200165	0.130518	0.204845	0.200624
0.191162	0.136633	0.190822	0.191833	0.199339	0.174675	0.201275	0.180008	0.209353	0.181724	0.153818	0.0777515	0.149707	0.0921959	0.196206	0.174605	0.179395	0.153085	0.219477	0.211347	0.209876	0.227351	0.221014	0.22121	0.216744	0.217661	0.192824	0.177186	0.197486	0.193753	0.186564	0.177808	0.199795	0.200083	0.204746	0.207113	0.215974	0.21627	0.197561	0.145019	0.197559	0.206811
0.202702	0.146118	0.201479	0.188743	0.198551	0.16608	0.2001	0.174516	0.186952	0.191044	0.146574	0.0673065	0.159607	0.0971103	0.199492	0.157588	0.183427	0.150642	0.208868	0.204624	0.207808	0.221967	0.211325	0.208294	0.223859	0.21705	0.194858	0.181257	0.181996	0.182139	0.199202	0.180156	0.204933	0.193921	0.212623	0.193897	0.217912	0.21285	0.186521	0.143866	0.202483	0.207356
0.191824	0.131239	0.193983	0.1778	0.195782	0.172834	0.200986	0.179021	0.204076	0.185536	0.155094	0.0813472	0.164766	0.0879051	0.190178	0.155967	0.171941	0.151373	0.213201	0.204502	0.210623	0.222716	0.210046	0.219262	0.217569	0.219085	0.205421	0.179828	0.183092	0.193019	0.194652	0.183227	0.208869	0.19497	0.205918	0.202026	0.224232	0.219437	0.186732	0.142762	0.205162	0.202751
0.191698	0.142595	0.203249	0.188488	0.200782	0.178067	0.203662	0.180039	0.198326	0.18864	0.151285	0.0762853	0.162925	0.103269	0.197313	0.164355	0.16833	0.146159	0.212618	0.215216	0.218888	0.222678	0.20406	0.213056	0.219163	0.218579	0.193841	0.176929	0.182118	0.188515	0.192253	0.184892	0.213531	0.204509	0.201589	0.199852	0.223756	0.220654	0.204338	0.13941	0.203264	0.19997
0.199283	0.142622	0.185596	0.183988	0.192618	0.172823	0.196654	0.175262	0.202455	0.179705	0.158855	0.079219	0.159917	0.0939696	0.195202	0.165607	0.16713	0.15574	0.201302	0.201587	0.213553	0.220276	0.219553	0.215323	0.225244	0.227727	0.192323	0.182963	0.196348	0.189852	0.202439	0.181247	0.206524	0.206736	0.210653	0.201993	0.211329	0.218131	0.188283	0.147119	0.201461	0.203628
0.199427	0.1424	0.188365	0.188721	0.198112	0.167116	0.196374	0.177842	0.203214	0.187602	0.16166	0.0837923	0.163849	0.09946	0.196557	0.168435	0.17817	0.144261	0.211752	0.201722	0.2042	0.214426	0.218399	0.212525	0.224889	0.215444	0.193101	0.17769	0.187428	0.191689	0.197152	0.180961	0.211519	0.194657	0.205777	0.202996	0.215967	0.211802	0.198476	0.156458	0.198764	0.203882
0.199177	0.140272	0.188561	0.187529	0.189871	0.173198	0.198608	0.178839	0.189981	0.18362	0.155327	0.0738358	0.167079	0.0945472	0.198166	0.159686	0.173953	0.146547	0.215737	0.212613	0.202611	0.236077	0.222575	0.209901	0.22063	0.215538	0.193963	0.173316	0.19717	0.197106	0.192766	0.17283	0.200151	0.200801	0.206678	0.190141	0.202252	0.212872	0.193114	0.134803	0.207596	0.198717
0.197197	0.148279	0.188993	0.185658	0.18543	0.171045	0.204266	0.181888	0.199757	0.191193	0.160824	0.0854259	0.158205	0.091037	0.195051	0.162123	0.186141	0.151083	0.202091	0.206283	0.220012	0.220152	0.207141	0.212111	0.222686	0.220561	0.19269	0.174173	0.202024	0.188654	0.192154	0.196319	0.207219	0.206555	0.200118	0.180085	0.216411	0.220802	0.185884	0.142819	0.204776	0.208393
0.197912	0.139924	0.198868	0.190124	0.191724	0.177618	0.204852	0.185563	0.195608	0.185283	0.159685	0.0747072	0.163516	0.0900838	0.195512	0.167956	0.178588	0.163014	0.218181	0.207939	0.211425	0.217897	0.216268	0.218165	0.217097	0.228988	0.179414	0.184684	0.190632	0.188334	0.18539	0.185824	0.204742	0.204218	0.202899	0.195807	0.226847	0.224328	0.178363	0.149923	0.203819	0.200509
0.208451	0.143407	0.195907	0.197442	0.207225	0.186127	0.208274	0.177685	0.193214	0.193816	0.156593	0.0647998	0.15822	0.0936128	0.202295	0.164992	0.174374	0.156635	0.210114	0.201537	0.224875	0.226645	0.214818	0.215629	0.220155	0.226482	0.191895	0.180972	0.187656	0.189751	0.205582	0.185638	0.194388	0.20732	0.207549	0.195013	0.218193	0.214771	0.190376	0.146152	0.20653	0.197098
0.195253	0.136605	0.185537	0.187466	0.194136	0.174911	0.20855	0.172	0.202226	0.181672	0.157427	0.0770924	0.16187	0.0895475	0.19337	0.158133	0.172668	0.155156	0.205157	0.218744	0.214376	0.220404	0.21051	0.218017	0.225972	0.226551	0.184882	0.173782	0.19229	0.172772	0.210056	0.179356	0.205218	0.207968	0.209217	0.199509	0.209133	0.216243	0.196983	0.131384	0.203583	0.201549
0.196498	0.141784	0.189224	0.178383	0.195295	0.181241	0.205544	0.188144	0.200621	0.175004	0.156691	0.0812435	0.164681	0.0973566	0.196682	0.161111	0.17367	0.142566	0.213118	0.198639	0.206729	0.213635	0.217783	0.202044	0.214858	0.223742	0.198522	0.184877	0.193253	0.189836	0.188573	0.186659	0.206543	0.201292	0.21105	0.1938	0.212593	0.227279	0.19963	0.136785	0.209187	0.200966
0.191925	0.130528	0.193334	0.186718	0.18847	0.173973	0.203566	0.180666	0.199562	0.192322	0.165743	0.082943	0.172502	0.0962134	0.193673	0.170405	0.171402	0.146098	0.212412	0.204015	0.209255	0.225977	0.210367	0.204529	0.221184	0.220588	0.195009	0.176775	0.182378	0.185777	0.201827	0.194219	0.205537	0.19753	0.206873	0.201672	0.219825	0.209655	0.187329	0.137096	0.195211	0.19265
0.194213	0.139933	0.194526	0.193333	0.194832	0.196766	0.214217	0.179916	0.199482	0.182752	0.168203	0.0740231	0.156647	0.100497	0.197259	0.165358	0.172973	0.147866	0.21666	0.200194	0.215764	0.218126	0.212433	0.211551	0.222298	0.234355	0.191207	0.187937	0.196344	0.184409	0.198724	0.186086	0.208473	0.197929	0.207742	0.200161	0.228484	0.220456	0.184923	0.137738	0.209636	0.200763
0.202425	0.142791	0.198191	0.191564	0.19343	0.177407	0.209042	0.180145	0.194066	0.192493	0.157385	0.081496	0.171143	0.0938369	0.194276	0.163499	0.18111	0.143728	0.204667	0.202711	0.213019	0.214341	0.20493	0.217967	0.211924	0.221797	0.196951	0.179242	0.1914	0.190129	0.199046	0.189573	0.210366	0.193576	0.204725	0.198157	0.211505	0.218364	0.196988	0.150565	0.209932	0.211848
0.182924	0.147092	0.198419	0.187664	0.192509	0.175412	0.200502	0.172066	0.198352	0.188159	0.163532	0.0708543	0.172735	0.0911502	0.198972	0.166657	0.176265	0.145883	0.202602	0.217043	0.196655	0.220009	0.219393	0.218942	0.225405	0.220245	0.195414	0.180644	0.188611	0.193778	0.197194	0.178281	0.199756	0.2031	0.208911	0.199385	0.207046	0.208821	0.186173	0.140394	0.207548	0.208258
0.189999	0.149065	0.193333	0.187127	0.194511	0.185603	0.2098	0.186986	0.200283	0.186921	0.156038	0.0903466	0.157117	0.100739	0.199445	0.161571	0.165107	0.153569	0.190785	0.206578	0.213571	0.223477	0.226042	0.214549	0.221472	0.221823	0.190341	0.173865	0.194243	0.189162	0.195471	0.185148	0.20492	0.21836	0.19831	0.192317	0.224457	0.213372	0.180139	0.137405	0.19862	0.208815
0.20106	0.143732	0.188073	0.185063	0.192096	0.174244	0.211139	0.181451	0.195855	0.183099	0.159672	0.0904455	0.169256	0.0980404	0.184512	0.155942	0.176969	0.153641	0.207735	0.205425	0.216991	0.22676	0.220403	0.207377	0.217552	0.235187	0.199771	0.177635	0.18291	0.181608	0.197878	0.176053	0.2073	0.202366	0.215077	0.196489	0.219747	0.218749	0.18274	0.147461	0.20063	0.19328
0.190673	0.14007	0.205516	0.190518	0.191895	0.180764	0.209282	0.167585	0.191525	0.183123	0.165391	0.0811964	0.161398	0.0925349	0.195386	0.155138	0.17449	0.144328	0.215439	0.209547	0.203659	0.213523	0.2066	0.212241	0.220743	0.225858	0.195465	0.176085	0.193559	0.187719	0.193427	0.175031	0.209858	0.204741	0.200005	0.196251	0.215887	0.215078	0.191834	0.139235	0.202001	0.20343
0.192847	0.141066	0.19467	0.194856	0.191667	0.182494	0.209826	0.183965	0.202621	0.185664	0.1618	0.0751098	0.169328	0.100669	0.196058	0.161651	0.170207	0.140231	0.219689	0.204438	0.216413	0.230071	0.206836	0.22991	0.212932	0.227155	0.193267	0.174358	0.196158	0.191866	0.195206	0.182982	0.203521	0.201813	0.207131	0.190314	0.219832	0.213278	0.18104	0.151023	0.205571	0.207279
0.205039	0.140665	0.189959	0.185826	0.190595	0.170152	0.197582	0.186813	0.194703	0.176622	0.162957	0.0732965	0.159617	0.0986416	0.194176	0.166704	0.17172	0.143768	0.205604	0.187994	0.209815	0.225224	0.221418	0.222205	0.225727	0.219021	0.192795	0.178711	0.194255	0.193918	0.201736	0.184588	0.206852	0.202513	0.206488	0.196908	0.217313	0.211799	0.194702	0.135303	0.209372	0.204156
0.191923	0.129567	0.193121	0.187066	0.195082	0.182961	0.198017	0.176435	0.199683	0.182479	0.157679	0.0789561	0.165064	0.100723	0.196879	0.173127	0.176497	0.156517	0.220277	0.207344	0.216253	0.224012	0.209801	0.211189	0.211822	0.221842	0.188362	0.187709	0.194514	0.193771	0.193657	0.184182	0.210156	0.19599	0.221979	0.192085	0.208384	0.225809	0.189241	0.136471	0.21019	0.207863
0.194936	0.142411	0.190927	0.187513	0.192118	0.175737	0.192831	0.180503	0.20147	0.180766	0.154787	0.0759408	0.16597	0.0995575	0.203345	0.175478	0.17607	0.143247	0.210753	0.207002	0.217484	0.213779	0.209262	0.215975	0.214525	0.220602	0.187245	0.180763	0.193725	0.187627	0.196303	0.179544	0.211894	0.208982	0.205352	0.191061	0.228221	0.220349	0.194058	0.153116	0.199636	0.208838
0.20157	0.142246	0.18832	0.189115	0.19204	0.177632	0.212812	0.182666	0.184802	0.187306	0.163891	0.0737429	0.161579	0.0944057	0.179607	0.169453	0.171988	0.150423	0.204315	0.197869	0.212966	0.221146	0.213347	0.208183	0.222321	0.222329	0.201698	0.173437	0.190138	0.190901	0.205009	0.187536	0.208833	0.190875	0.205863	0.200958	0.228105	0.22683	0.187673	0.151628	0.201971	0.198724
0.191276	0.149465	0.185752	0.188991	0.198802	0.175653	0.222878	0.192202	0.199096	0.179957	0.160711	0.0840352	0.160437	0.0883174	0.192585	0.164214	0.167897	0.139874	0.201657	0.214944	0.21692	0.219891	0.211629	0.215646	0.219354	0.214386	0.206217	0.168424	0.196737	0.18491	0.195094	0.177865	0.200438	0.19756	0.211369	0.187686	0.211303	0.217985	0.193748	0.139349	0.199525	0.196561
0.197159	0.143197	0.197314	0.185957	0.204374	0.17221	0.207527	0.180174	0.199103	0.174274	0.162276	0.0803664	0.163078	0.0964479	0.193706	0.176186	0.174723	0.147357	0.224919	0.206834	0.204679	0.233877	0.201584	0.2178	0.216231	0.224695	0.204332	0.180715	0.193303	0.187113	0.203562	0.17852	0.209503	0.199855	0.204566	0.193614	0.216351	0.220374	0.183395	0.137357	0.206622	0.199537
0.195424	0.141557	0.189768	0.190641	0.194131	0.171917	0.203872	0.173145	0.195036	0.187639	0.163956	0.0743657	0.167272	0.090879	0.201127	0.160362	0.166579	0.148903	0.205176	0.209843	0.217935	0.22043	0.200253	0.198094	0.222743	0.223946	0.191502	0.179821	0.19442	0.195094	0.205214	0.17215	0.198408	0.201098	0.20257	0.193869	0.220961	0.225376	0.196605	0.138214	0.202898	0.213361
0.194897	0.142959	0.178944	0.181058	0.189175	0.164723	0.212874	0.174827	0.196946	0.181803	0.15827	0.0750255	0.160958	0.0944899	0.193511	0.166909	0.182733	0.13894	0.211844	0.197604	0.207211	0.225443	0.221186	0.212999	0.218539	0.215342	0.19217	0.17876	0.190209	0.1966	0.188233	0.182939	0.197969	0.205307	0.204354	0.197995	0.216824	0.223655	0.192012	0.147651	0.204493	0.203604
0.181818	0.138634	0.184876	0.186769	0.195506	0.169591	0.206242	0.186015	0.193964	0.180147	0.16166	0.0740287	0.159362	0.102745	0.192613	0.162597	0.174722	0.151039	0.204549	0.204069	0.206587	0.220824	0.202812	0.211668	0.222266	0.225431	0.203374	0.178785	0.191269	0.182134	0.199567	0.181852	0.208429	0.202205	0.205637	0.190146	0.216204	0.221043	0.195386	0.153597	0.210469	0.19939
0.195212	0.148361	0.197109	0.189048	0.193506	0.167226	0.206068	0.179375	0.199588	0.178973	0.158597	0.0725566	0.161948	0.101024	0.200455	0.165151	0.171651	0.154913	0.225518	0.204593	0.20982	0.22781	0.205582	0.204699	0.214482	0.229778	0.201183	0.174697	0.183189	0.193977	0.190987	0.178275	0.211232	0.19904	0.203766	0.196134	0.220584	0.222356	0.20363	0.138822	0.211284	0.210685
0.189381	0.140989	0.191854	0.188542	0.197589	0.170338	0.202105	0.183837	0.199458	0.186642	0.166692	0.0716524	0.163232	0.0922306	0.200922	0.1622	0.169119	0.142727	0.210385	0.201872	0.211836	0.22926	0.217764	0.214671	0.223956	0.222963	0.177352	0.173714	0.195093	0.169626	0.199433	0.184234	0.205781	0.194868	0.206562	0.203575	0.226049	0.224937	0.186715	0.149172	0.202903	0.208885
0.192277	0.138136	0.185891	0.19133	0.197697	0.170028	0.203984	0.178665	0.205455	0.186498	0.159323	0.0686337	0.161196	0.101029	0.198746	0.159158	0.172496	0.156201	0.213191	0.210474	0.220966	0.214718	0.209512	0.212675	0.216013	0.228169	0.201408	0.183969	0.188135	0.19746	0.19535	0.184417	0.201562	0.209456	0.208362	0.203348	0.216304	0.221971	0.180226	0.148474	0.20613	0.189105
0.200716	0.133752	0.183201	0.188701	0.197976	0.186676	0.207982	0.180543	0.19635	0.193632	0.160523	0.0855238	0.149785	0.0822647	0.192635	0.156363	0.164869	0.155537	0.211512	0.213323	0.206014	0.22204	0.215281	0.206775	0.21715	0.219645	0.187274	0.183456	0.191615	0.18676	0.185657	0.180884	0.200825	0.206245	0.199266	0.200357	0.21815	0.217161	0.185502	0.155345	0.212303	0.194338
0.20238	0.146547	0.192135	0.185618	0.192906	0.175516	0.208371	0.179336	0.203705	0.186797	0.148172	0.0670294	0.156147	0.0987893	0.191854	0.154591	0.176377	0.146168	0.214694	0.206059	0.219152	0.222833	0.215984	0.207402	0.224204	0.230717	0.199423	0.181729	0.181927	0.201543	0.200918	0.174305	0.212615	0.202576	0.218991	0.188371	0.226698	0.22188	0.191295	0.152433	0.198156	0.195851
0.198676	0.142097	0.19473	0.187225	0.196325	0.180292	0.206683	0.18635	0.191407	0.171869	0.164379	0.0752991	0.165524	0.0928121	0.192291	0.17127	0.166299	0.150896	0.206949	0.201512	0.211149	0.215692	0.218571	0.207396	0.214337	0.223941	0.192575	0.172296	0.19457	0.190745	0.206154	0.173614	0.201209	0.207968	0.209199	0.191521	0.214283	0.212374	0.190078	0.14611	0.208143	0.205856
0.197755	0.138169	0.194239	0.184434	0.205178	0.176956	0.206688	0.181883	0.185608	0.181764	0.162577	0.0705444	0.165499	0.105402	0.204166	0.160888	0.177275	0.146552	0.207214	0.213421	0.211955	0.230667	0.215418	0.213317	0.226116	0.225259	0.189581	0.178525	0.194891	0.191612	0.190888	0.180547	0.202047	0.204433	0.20755	0.204354	0.229152	0.215215	0.19913	0.155806	0.19771	0.205996
0.193772	0.139582	0.196443	0.183027	0.195829	0.180384	0.198016	0.175198	0.193097	0.168036	0.162067	0.0707725	0.165762	0.0929896	0.196276	0.179508	0.169863	0.144752	0.216279	0.205944	0.204543	0.226157	0.220534	0.216437	0.219794	0.214042	0.198425	0.174529	0.184941	0.186942	0.209192	0.180944	0.202396	0.198562	0.209095	0.19727	0.211209	0.22173	0.189782	0.142804	0.207405	0.207101
0.193401	0.144104	0.188096	0.186902	0.188376	0.175043	0.209464	0.182426	0.19485	0.181341	0.15716	0.0682782	0.168761	0.102	0.200486	0.166149	0.172661	0.142814	0.207829	0.203913	0.202752	0.22468	0.208317	0.2124	0.224198	0.221604	0.194337	0.179744	0.195207	0.192506	0.197036	0.182854	0.203479	0.196644	0.215979	0.199316	0.217903	0.22306	0.179117	0.154401	0.199567	0.193932
0.182221	0.147696	0.191618	0.196103	0.182627	0.177233	0.206586	0.189758	0.202382	0.1881	0.157258	0.0694588	0.167115	0.0906632	0.192363	0.156661	0.168074	0.153026	0.206715	0.196214	0.211443	0.216144	0.216741	0.219464	0.219372	0.219891	0.194145	0.179771	0.194276	0.187205	0.20398	0.178317	0.19948	0.200896	0.217809	0.196096	0.221782	0.21211	0.199356	0.145537	0.199789	0.204392
0.19869	0.144787	0.182423	0.187511	0.180229	0.175134	0.195254	0.181911	0.2118	0.182603	0.162297	0.0840889	0.162438	0.109283	0.199486	0.172596	0.163056	0.137629	0.212487	0.203577	0.211829	0.220148	0.207115	0.21595	0.220789	0.223052	0.198573	0.17796	0.193041	0.187054	0.197635	0.178082	0.20232	0.208859	0.212443	0.191872	0.210662	0.21996	0.201237	0.154525	0.201534	0.203144
0.209198	0.139086	0.179205	0.177787	0.202549	0.184781	0.210248	0.172719	0.205567	0.167148	0.163429	0.0804351	0.158527	0.0979939	0.197832	0.159926	0.170757	0.14783	0.215373	0.201475	0.217827	0.220858	0.217192	0.215606	0.216465	0.221115	0.191243	0.184301	0.18077	0.183054	0.20554	0.190652	0.201139	0.217537	0.207202	0.190367	0.222293	0.220467	0.191866	0.142166	0.203656	0.190184
0.200185	0.137268	0.191515	0.195956	0.199074	0.173075	0.2019	0.168539	0.194093	0.18038	0.16993	0.0685084	0.163522	0.103265	0.19332	0.154124	0.169296	0.151258	0.216015	0.205198	0.198055	0.223864	0.213117	0.209401	0.20963	0.224807	0.18639	0.174682	0.200103	0.197104	0.20285	0.181442	0.204836	0.196971	0.199526	0.199007	0.212817	0.220061	0.193675	0.141842	0.203464	0.201277
0.195358	0.142724	0.191279	0.195629	0.188477	0.17377	0.211033	0.172508	0.193655	0.186856	0.161876	0.0760142	0.165607	0.102086	0.201198	0.163638	0.177476	0.14539	0.210459	0.202131	0.216969	0.228021	0.211775	0.216903	0.209951	0.227044	0.193975	0.176007	0.188154	0.196673	0.204245	0.180599	0.200394	0.202265	0.204089	0.187053	0.216851	0.224456	0.191034	0.135436	0.198021	0.197453
0.211141	0.140213	0.187865	0.189115	0.193488	0.179055	0.20466	0.18347	0.202171	0.181164	0.152433	0.0806719	0.160792	0.104342	0.200054	0.169972	0.165943	0.153902	0.207556	0.204576	0.210478	0.226258	0.206666	0.209755	0.222983	0.218146	0.184597	0.188538	0.192792	0.183652	0.198203	0.184544	0.207635	0.197715	0.210143	0.199677	0.223883	0.21158	0.192537	0.148003	0.202361	0.202975
0.186617	0.138016	0.191364	0.187795	0.192293	0.173611	0.197356	0.181554	0.196011	0.186824	0.165043	0.0733851	0.158273	0.10136	0.208759	0.170922	0.166267	0.145074	0.216094	0.213082	0.204111	0.225558	0.205793	0.210917	0.220958	0.225	0.191552	0.181528	0.186272	0.189207	0.19538	0.168489	0.198856	0.202494	0.211053	0.19345	0.216327	0.213771	0.184275	0.150189	0.207872	0.20139
0.193975	0.134538	0.187492	0.182285	0.193594	0.169359	0.214126	0.179278	0.195188	0.184251	0.158588	0.0790732	0.164419	0.0994002	0.194333	0.160035	0.192538	0.147268	0.213008	0.204116	0.21639	0.230206	0.219559	0.212897	0.225231	0.216289	0.189733	0.174784	0.200638	0.192532	0.205973	0.166342	0.205446	0.196877	0.216376	0.199577	0.212824	0.220237	0.196963	0.145406	0.204352	0.215625
0.200129	0.134948	0.191663	0.192205	0.180329	0.169133	0.20496	0.178546	0.195934	0.190328	0.164452	0.075987	0.168187	0.0949134	0.192927	0.164062	0.163939	0.152115	0.209868	0.198128	0.199242	0.233285	0.211873	0.208869	0.222025	0.222499	0.198255	0.176245	0.18331	0.188144	0.203019	0.185225	0.203042	0.197344	0.199236	0.19804	0.22009	0.210997	0.18778	0.149419	0.201491	0.191398
0.190057	0.144325	0.196838	0.179082	0.196192	0.169957	0.202483	0.179819	0.198261	0.188126	0.16177	0.0915213	0.161923	0.0971677	0.201699	0.158911	0.165473	0.15564	0.209072	0.209542	0.208123	0.221174	0.21314	0.223245	0.223651	0.225213	0.194955	0.180011	0.190744	0.190343	0.197325	0.170984	0.2042	0.201957	0.207748	0.192538	0.219992	0.21743	0.199426	0.144391	0.196551	0.192347
0.194519	0.147982	0.190764	0.174395	0.186806	0.186319	0.20149	0.177754	0.200844	0.18786	0.161283	0.0723225	0.172066	0.0967539	0.192751	0.15908	0.169773	0.147481	0.215083	0.197961	0.220206	0.228047	0.212621	0.210867	0.228117	0.230711	0.197658	0.171509	0.186702	0.185476	0.194676	0.18021	0.202696	0.207534	0.207293	0.190177	0.220415	0.223648	0.194619	0.143198	0.21482	0.207625
0.19857	0.147856	0.194965	0.1864	0.188795	0.183235	0.204417	0.184908	0.20161	0.193322	0.172672	0.082358	0.164046	0.0944249	0.197801	0.162276	0.170787	0.148076	0.219794	0.208349	0.207779	0.226396	0.222139	0.208766	0.216513	0.220716	0.19767	0.171846	0.205733	0.192138	0.198943	0.187209	0.206961	0.19953	0.21022	0.18182	0.223353	0.20862	0.183177	0.135687	0.203223	0.208822
0.191804	0.137996	0.187417	0.18544	0.199781	0.186964	0.214069	0.173587	0.198965	0.175185	0.164631	0.0799834	0.163834	0.0944511	0.196939	0.168524	0.169275	0.152026	0.221227	0.211346	0.214681	0.225033	0.218609	0.215021	0.21183	0.23056	0.192642	0.177539	0.18257	0.190338	0.185618	0.185826	0.200406	0.195493	0.199007	0.19743	0.221568	0.213726	0.183272	0.147297	0.195618	0.204647
0.191815	0.148765	0.183227	0.188028	0.19587	0.171346	0.200564	0.177178	0.204319	0.188576	0.163316	0.081927	0.165084	0.0898038	0.20121	0.159856	0.168474	0.143484	0.213853	0.203443	0.20589	0.220421	0.213888	0.209287	0.207414	0.221434	0.192545	0.167872	0.184043	0.198269	0.193977	0.176438	0.199588	0.202893	0.209668	0.210083	0.226381	0.215446	0.192511	0.131689	0.214966	0.209128
0.184506	0.138764	0.192516	0.18647	0.193197	0.169543	0.211684	0.192981	0.203284	0.176866	0.163425	0.0701715	0.171316	0.0983308	0.182234	0.172777	0.172821	0.145922	0.203474	0.20537	0.217531	0.221717	0.211249	0.218756	0.218272	0.225277	0.188834	0.186065	0.195711	0.188624	0.202429	0.181063	0.2081	0.20277	0.199914	0.200936	0.218401	0.219085	0.193869	0.144208	0.209429	0.208304
0.195039	0.149457	0.197532	0.176555	0.191331	0.182194	0.208153	0.169446	0.195327	0.189411	0.15871	0.0766581	0.167893	0.0973785	0.203164	0.162526	0.172351	0.14458	0.207805	0.210374	0.215596	0.221264	0.218139	0.206773	0.225192	0.218971	0.190349	0.181011	0.189084	0.189127	0.192549	0.179897	0.19664	0.200908	0.208927	0.199147	0.223078	0.213636	0.191795	0.12965	0.207535	0.200432
0.198624	0.139653	0.188135	0.185546	0.20553	0.183009	0.203654	0.170627	0.193074	0.191104	0.172875	0.0688709	0.149825	0.110579	0.20251	0.17108	0.157336	0.13765	0.212984	0.205258	0.213086	0.212314	0.218165	0.20757	0.223377	0.216654	0.188776	0.180382	0.194842	0.184742	0.199404	0.178121	0.201141	0.194805	0.210031	0.199488	0.225714	0.207558	0.192547	0.138061	0.207437	0.202905
0.191788	0.142671	0.20389	0.18926	0.194996	0.182277	0.216379	0.174622	0.208101	0.183767	0.154744	0.0806513	0.15637	0.0927952	0.202819	0.168663	0.178481	0.159783	0.219127	0.213389	0.204712	0.239614	0.207192	0.203389	0.220751	0.221208	0.198855	0.182071	0.196109	0.202263	0.193964	0.184985	0.20276	0.199893	0.206218	0.200573	0.215546	0.225756	0.197479	0.145376	0.20982	0.207359
0.195268	0.136883	0.196236	0.201431	0.188499	0.16813	0.201898	0.180405	0.201585	0.189547	0.142656	0.0822667	0.160422	0.102979	0.205756	0.160463	0.161329	0.146765	0.217453	0.210658	0.205935	0.227035	0.206362	0.206183	0.218848	0.217318	0.191838	0.1812	0.199946	0.176865	0.197299	0.177864	0.202187	0.201019	0.198536	0.197061	0.223441	0.230347	0.199583	0.139071	0.192723	0.201443
0.205986	0.13973	0.186187	0.192022	0.190823	0.180329	0.209826	0.168855	0.194554	0.180214	0.16358	0.0771647	0.160958	0.0962265	0.19933	0.160974	0.166836	0.147641	0.209234	0.199335	0.198672	0.228322	0.205045	0.212168	0.223682	0.223126	0.19461	0.186779	0.195908	0.189371	0.196424	0.178634	0.194996	0.213306	0.209866	0.194841	0.227284	0.220229	0.196151	0.155178	0.208785	0.200977
0.192258	0.158559	0.194885	0.17457	0.19248	0.175172	0.198886	0.176052	0.20917	0.189354	0.158046	0.0777335	0.17303	0.0898792	0.20293	0.169111	0.172912	0.14168	0.202454	0.212745	0.195295	0.223529	0.218743	0.217577	0.224861	0.220677	0.195472	0.187139	0.196151	0.186481	0.195423	0.188405	0.208417	0.205785	0.203436	0.196824	0.212502	0.217549	0.19232	0.146085	0.206365	0.207382
0.182861	0.140165	0.189292	0.206981	0.186659	0.167111	0.206067	0.183474	0.202183	0.178414	0.154637	0.0821532	0.168526	0.103742	0.200331	0.166082	0.165328	0.155402	0.202705	0.210081	0.213628	0.217723	0.212843	0.214988	0.214049	0.21512	0.190362	0.183046	0.189587	0.179141	0.19404	0.165683	0.206014	0.200268	0.198246	0.196044	0.21605	0.225569	0.187946	0.124985	0.208441	0.214847
0.193974	0.138722	0.196383	0.185989	0.193194	0.170335	0.203116	0.179629	0.209081	0.180868	0.159636	0.0754549	0.16126	0.10024	0.198648	0.168426	0.180966	0.137921	0.204611	0.20155	0.200849	0.226039	0.217491	0.213313	0.227179	0.222843	0.205277	0.176986	0.197818	0.180685	0.198465	0.184684	0.20212	0.19885	0.212581	0.195896	0.213323	0.212217	0.185698	0.151979	0.210161	0.21308
0.187398	0.138086	0.182604	0.184979	0.189708	0.172217	0.204618	0.183119	0.193861	0.188717	0.163621	0.0886634	0.157887	0.100354	0.197823	0.16972	0.180893	0.1218	0.21035	0.206207	0.216405	0.228013	0.203119	0.215154	0.220655	0.221	0.177786	0.169999	0.198174	0.186157	0.191551	0.182829	0.19304	0.195203	0.204055	0.207564	0.221198	0.215165	0.182296	0.150395	0.210642	0.199676
0.198616	0.14717	0.192274	0.185337	0.194153	0.181627	0.196281	0.171019	0.202604	0.18231	0.166352	0.0746149	0.153442	0.0926399	0.203268	0.166846	0.17714	0.169225	0.194294	0.200725	0.20617	0.22134	0.218205	0.215757	0.223889	0.227482	0.194327	0.178254	0.185632	0.192295	0.197947	0.183611	0.204198	0.212442	0.204713	0.20164	0.210122	0.215497	0.18943	0.148607	0.198685	0.203312
0.190646	0.134609	0.19298	0.179812	0.194962	0.184601	0.211323	0.177683	0.189177	0.17324	0.154566	0.0823939	0.17123	0.100917	0.194272	0.172836	0.17782	0.147983	0.202392	0.198964	0.212221	0.217789	0.219493	0.211246	0.217974	0.228358	0.188367	0.185929	0.200459	0.199104	0.195214	0.173818	0.209757	0.20019	0.22233	0.194406	0.207757	0.224204	0.183744	0.146455	0.20364	0.200415
0.207772	0.145784	0.194942	0.188086	0.18172	0.176663	0.202405	0.184678	0.209745	0.177936	0.158692	0.0874105	0.152577	0.103206	0.19611	0.163702	0.16806	0.169555	0.214424	0.209383	0.207176	0.229586	0.205975	0.213628	0.222762	0.224991	0.194637	0.187121	0.198307	0.199653	0.189878	0.18816	0.20353	0.197525	0.207649	0.200518	0.227045	0.224377	0.186228	0.141017	0.202887	0.198521
0.191819	0.135607	0.181999	0.187314	0.189594	0.173187	0.208273	0.185582	0.19424	0.188462	0.163241	0.0762889	0.156873	0.107778	0.193137	0.172546	0.173721	0.152963	0.217051	0.212964	0.212585	0.229044	0.210218	0.208499	0.225511	0.222271	0.190859	0.176577	0.190196	0.182923	0.198519	0.176224	0.210954	0.199044	0.200265	0.203751	0.22401	0.212992	0.195321	0.142274	0.201798	0.192673
0.188387	0.139735	0.190809	0.184017	0.190646	0.172637	0.206737	0.176152	0.197313	0.181792	0.160086	0.0780017	0.164252	0.0901265	0.207111	0.153229	0.170372	0.140653	0.211637	0.203571	0.213582	0.22837	0.220862	0.218552	0.230961	0.226642	0.202834	0.174983	0.191942	0.190215	0.184067	0.177432	0.20028	0.206333	0.200353	0.187635	0.211718	0.220587	0.196698	0.148949	0.208397	0.201915
0.19593	0.145215	0.188417	0.184061	0.199954	0.18152	0.193958	0.169815	0.200881	0.185017	0.157578	0.0725896	0.161097	0.0931972	0.189649	0.15933	0.174828	0.143363	0.216279	0.201116	0.213854	0.227317	0.220142	0.213563	0.212294	0.210078	0.19012	0.178029	0.209516	0.200021	0.205111	0.184559	0.200569	0.204169	0.210617	0.203349	0.225874	0.218025	0.192125	0.153187	0.20546	0.196024
0.191457	0.142688	0.190269	0.192882	0.198437	0.178766	0.211793	0.184808	0.196747	0.183614	0.164871	0.0847172	0.152344	0.0934314	0.198371	0.16023	0.173115	0.156791	0.210154	0.205755	0.207431	0.22865	0.215684	0.20416	0.217928	0.230504	0.203153	0.169812	0.190788	0.188361	0.198949	0.183539	0.196583	0.202248	0.20218	0.200067	0.213168	0.222792	0.192513	0.153866	0.21388	0.204378
0.194388	0.136527	0.198797	0.189607	0.183629	0.182453	0.208029	0.180892	0.207005	0.185591	0.159057	0.0789516	0.166473	0.0919444	0.197775	0.164877	0.159973	0.147292	0.214006	0.201957	0.213707	0.21518	0.218242	0.215492	0.226606	0.223316	0.187812	0.185267	0.18602	0.192059	0.20219	0.175694	0.209535	0.196373	0.201872	0.196137	0.218593	0.213419	0.193114	0.139008	0.212076	0.206278
0.199972	0.139712	0.183151	0.198562	0.190351	0.180114	0.204923	0.177438	0.206466	0.184656	0.156148	0.0710118	0.174175	0.0981368	0.203752	0.171543	0.166241	0.147748	0.207616	0.211923	0.208678	0.223318	0.218071	0.205847	0.225199	0.230114	0.200566	0.180948	0.191092	0.194399	0.199186	0.18232	0.206259	0.204746	0.214082	0.200231	0.224249	0.223109	0.202784	0.147452	0.204384	0.188947
0.188963	0.141504	0.201017	0.177996	0.197178	0.172737	0.201515	0.180271	0.205225	0.187519	0.162704	0.0761168	0.174425	0.0931964	0.194434	0.167399	0.17183	0.162189	0.214334	0.204437	0.216178	0.226977	0.207978	0.222915	0.217943	0.222507	0.199069	0.174948	0.194361	0.196206	0.186442	0.188622	0.213148	0.197356	0.209596	0.19559	0.224645	0.223648	0.185607	0.150576	0.209138	0.202648
0.199115	0.142267	0.194999	0.187602	0.185883	0.180857	0.203306	0.185566	0.190885	0.185601	0.157665	0.0861124	0.156361	0.100439	0.201771	0.15855	0.168961	0.142127	0.208018	0.21054	0.21676	0.214599	0.220554	0.216945	0.217805	0.210027	0.19533	0.183015	0.193324	0.196163	0.189575	0.180115	0.215428	0.207233	0.208322	0.197371	0.220724	0.210378	0.189353	0.152767	0.20083	0.190848
0.196503	0.136877	0.193528	0.180773	0.203564	0.174878	0.21182	0.185404	0.206603	0.179444	0.155326	0.0795042	0.162768	0.0954517	0.202181	0.16146	0.171606	0.148527	0.205912	0.209333	0.210341	0.239547	0.204295	0.211414	0.229714	0.234279	0.185159	0.181507	0.183372	0.194933	0.192365	0.168636	0.201655	0.202113	0.20064	0.1902	0.222103	0.225884	0.199224	0.141348	0.197925	0.200888
0.200068	0.144982	0.193607	0.188895	0.199123	0.177987	0.20491	0.190666	0.206667	0.187619	0.160102	0.084751	0.162377	0.10038	0.197184	0.162005	0.182973	0.148897	0.206041	0.209519	0.215345	0.221539	0.200102	0.206306	0.22483	0.218155	0.201126	0.193895	0.180494	0.194826	0.195515	0.193574	0.214364	0.20147	0.205191	0.197331	0.220914	0.21335	0.185559	0.145004	0.197391	0.196636
0.195443	0.141306	0.196982	0.196139	0.196866	0.18564	0.216243	0.1951	0.204936	0.186825	0.15791	0.0691337	0.161632	0.0973431	0.201937	0.15738	0.172988	0.144349	0.204279	0.206245	0.206205	0.222563	0.21191	0.206696	0.219842	0.219113	0.189174	0.176594	0.18642	0.188123	0.195723	0.181881	0.204537	0.204047	0.208206	0.197337	0.219311	0.204927	0.192262	0.142295	0.204361	0.203384
0.189399	0.142169	0.189819	0.192895	0.195274	0.167072	0.199607	0.178648	0.19532	0.194851	0.160708	0.0774377	0.162057	0.101143	0.19763	0.159889	0.173631	0.147607	0.208493	0.203245	0.213609	0.218555	0.229661	0.202881	0.220177	0.223625	0.194903	0.169788	0.197714	0.189151	0.19837	0.185491	0.209258	0.207028	0.204799	0.203949	0.231637	0.224918	0.193728	0.138094	0.208469	0.193141
0.194852	0.144944	0.194116	0.181395	0.204186	0.183053	0.205858	0.175576	0.194243	0.17823	0.166946	0.0763542	0.159937	0.0970717	0.18279	0.168617	0.173993	0.146775	0.208722	0.200668	0.211944	0.225074	0.212247	0.201996	0.220091	0.218625	0.197113	0.180012	0.195268	0.177406	0.19538	0.177484	0.208689	0.197598	0.213877	0.207913	0.223744	0.215199	0.183755	0.145265	0.216843	0.20299
0.200815	0.140764	0.193055	0.202457	0.189737	0.180257	0.205774	0.181554	0.196895	0.185268	0.158389	0.070792	0.164385	0.0963897	0.190275	0.158686	0.168892	0.153459	0.210354	0.201267	0.211564	0.220806	0.218438	0.222333	0.226119	0.236483	0.199787	0.173043	0.188065	0.190386	0.193711	0.181541	0.197674	0.19136	0.1968	0.192832	0.211495	0.208887	0.195055	0.131305	0.210091	0.194812
0.199706	0.139354	0.186418	0.191745	0.193938	0.176697	0.194266	0.180829	0.193455	0.175047	0.159746	0.0812933	0.161196	0.096352	0.199816	0.175894	0.169182	0.139431	0.21327	0.208439	0.20349	0.221051	0.206464	0.219042	0.206579	0.219861	0.20336	0.178033	0.186963	0.193703	0.196716	0.185588	0.201327	0.199211	0.20527	0.19443	0.213274	0.210292	0.188557	0.153379	0.208386	0.200292
0.181749	0.14161	0.193997	0.190017	0.188217	0.180657	0.218663	0.170696	0.197816	0.188358	0.154061	0.076586	0.159584	0.0894544	0.205194	0.164635	0.170391	0.159937	0.216269	0.206675	0.213997	0.220144	0.216172	0.208676	0.230536	0.220654	0.197397	0.177286	0.188015	0.181288	0.19956	0.178942	0.204025	0.201359	0.205558	0.198996	0.225161	0.220793	0.180837	0.15361	0.198532	0.198129
0.203147	0.138434	0.184149	0.188944	0.196646	0.167299	0.200187	0.176329	0.197672	0.180418	0.154154	0.0863575	0.161153	0.104124	0.199018	0.167071	0.175584	0.143739	0.209828	0.193658	0.20889	0.225725	0.211282	0.202742	0.220856	0.225111	0.191108	0.181127	0.176509	0.187995	0.207545	0.179325	0.198608	0.210241	0.205967	0.199835	0.217677	0.219682	0.192871	0.146488	0.197224	0.201715
0.186927	0.137941	0.191785	0.184949	0.193116	0.182451	0.211673	0.182435	0.200438	0.178985	0.158233	0.0818076	0.15584	0.0848342	0.209769	0.167349	0.174985	0.146062	0.209154	0.217833	0.20778	0.219777	0.213488	0.198833	0.224342	0.218504	0.196289	0.18454	0.191994	0.185384	0.196804	0.180112	0.203387	0.202402	0.205895	0.198516	0.230692	0.212676	0.188356	0.137451	0.210137	0.194872
0.197258	0.142218	0.191639	0.193043	0.189921	0.173093	0.198602	0.179393	0.197491	0.187179	0.161826	0.0626509	0.168589	0.0925551	0.202237	0.170128	0.17347	0.145985	0.213115	0.198071	0.216501	0.223196	0.217141	0.213754	0.211622	0.224637	0.197405	0.160792	0.192808	0.190004	0.191716	0.177012	0.206044	0.205049	0.216033	0.190518	0.225496	0.223311	0.197531	0.136557	0.205576	0.204239
0.202786	0.132095	0.189866	0.188082	0.196084	0.175066	0.206704	0.188154	0.192398	0.186219	0.156732	0.0773009	0.15738	0.0964152	0.199073	0.156889	0.173367	0.150285	0.210913	0.206537	0.207473	0.216002	0.207542	0.226005	0.223561	0.229054	0.194784	0.184995	0.189151	0.187358	0.192633	0.18039	0.212029	0.202436	0.212416	0.188694	0.212597	0.214688	0.189894	0.14033	0.213341	0.207925
0.197056	0.137435	0.186848	0.190315	0.196148	0.173999	0.210851	0.186245	0.192078	0.174939	0.162247	0.0697754	0.155757	0.0900212	0.201359	0.164302	0.163476	0.145936	0.207704	0.19805	0.213101	0.231103	0.216489	0.20571	0.218658	0.218478	0.194873	0.17346	0.192074	0.190281	0.191169	0.176787	0.211891	0.203646	0.212005	0.194836	0.20842	0.219305	0.186559	0.143294	0.208261	0.194504
0.196684	0.146678	0.194224	0.188877	0.197184	0.178626	0.200416	0.172893	0.195906	0.186704	0.161573	0.0762283	0.170992	0.100838	0.193324	0.162036	0.165715	0.142766	0.208595	0.205246	0.201229	0.232254	0.214434	0.214882	0.233118	0.229707	0.197516	0.174405	0.186115	0.192037	0.197996	0.173299	0.200371	0.208055	0.205798	0.185448	0.220419	0.220689	0.180401	0.140656	0.208149	0.189065
0.192682	0.147008	0.197623	0.18856	0.19557	0.177108	0.192398	0.185939	0.19562	0.189798	0.167028	0.0764565	0.158226	0.0896972	0.202558	0.161354	0.167481	0.151377	0.215528	0.202585	0.209737	0.226651	0.216637	0.213016	0.218817	0.226779	0.189077	0.170661	0.19821	0.194702	0.191552	0.179286	0.201598	0.208979	0.207212	0.193674	0.221779	0.216325	0.191637	0.139715	0.195782	0.193823
0.206062	0.141137	0.198412	0.180152	0.201578	0.172407	0.201904	0.177355	0.204231	0.185113	0.160636	0.0730179	0.162588	0.0992323	0.198015	0.166778	0.167622	0.158136	0.216198	0.197352	0.214666	0.227325	0.205556	0.210979	0.222207	0.226312	0.190456	0.186381	0.187382	0.196348	0.19505	0.185394	0.201481	0.199267	0.211064	0.200235	0.216643	0.220803	0.186831	0.140117	0.205348	0.205483
0.189672	0.145026	0.194325	0.189794	0.190802	0.179278	0.200158	0.17932	0.200574	0.186923	0.151515	0.0811189	0.162829	0.0937269	0.201352	0.169403	0.176579	0.14822	0.20695	0.199114	0.214738	0.236599	0.222085	0.228347	0.217158	0.218253	0.19419	0.177819	0.196831	0.191047	0.190234	0.17065	0.198578	0.19615	0.209906	0.209375	0.216448	0.219598	0.185765	0.142135	0.211775	0.195819
0.205963	0.134523	0.193782	0.191966	0.192306	0.168733	0.205458	0.17098	0.203054	0.183525	0.152659	0.0745442	0.159659	0.095686	0.19936	0.17792	0.174973	0.145994	0.208214	0.209418	0.20871	0.242682	0.214658	0.22138	0.222997	0.22999	0.184404	0.169718	0.194026	0.197992	0.198986	0.17678	0.207301	0.201978	0.20935	0.195123	0.216803	0.214662	0.196408	0.146347	0.204963	0.199637
0.196494	0.140278	0.195242	0.179778	0.184543	0.173016	0.200683	0.176841	0.194009	0.19468	0.155986	0.0669324	0.176547	0.110289	0.190684	0.168996	0.176166	0.152178	0.213803	0.203952	0.219818	0.225352	0.209918	0.217462	0.229249	0.212457	0.191984	0.169114	0.184334	0.191877	0.208259	0.186548	0.203692	0.199617	0.206114	0.194019	0.225217	0.212357	0.180687	0.133286	0.197086	0.205458
0.197015	0.142566	0.183297	0.178958	0.188822	0.173574	0.204708	0.18965	0.189246	0.184123	0.148016	0.0803241	0.158478	0.0954741	0.196806	0.165958	0.168648	0.151497	0.208459	0.198846	0.210659	0.225635	0.222993	0.21439	0.220863	0.220788	0.192417	0.179143	0.19167	0.198029	0.19348	0.17739	0.207566	0.197002	0.200313	0.196966	0.219032	0.219179	0.180334	0.144588	0.208709	0.194617
0.19874	0.133554	0.199736	0.185576	0.183956	0.182768	0.206158	0.169534	0.197449	0.182563	0.160584	0.0702241	0.155125	0.0975963	0.201251	0.162626	0.174184	0.154267	0.209304	0.203943	0.212197	0.219961	0.216788	0.220099	0.220058	0.227443	0.183652	0.18521	0.191155	0.196225	0.197654	0.173846	0.200949	0.191912	0.20615	0.187646	0.214005	0.217695	0.194113	0.136951	0.204084	0.185473
0.195692	0.141584	0.187173	0.184225	0.200261	0.170501	0.218348	0.179578	0.198465	0.182212	0.156606	0.0688463	0.164833	0.0961192	0.195265	0.161006	0.157183	0.149	0.199489	0.207159	0.212562	0.209873	0.209818	0.213535	0.218261	0.228334	0.183225	0.180828	0.186626	0.183969	0.198228	0.178915	0.193371	0.206363	0.205564	0.206287	0.210079	0.234996	0.184059	0.139195	0.192814	0.203759
0.210006	0.14033	0.19637	0.195844	0.185917	0.182132	0.211559	0.180287	0.191281	0.191279	0.155074	0.0759835	0.166478	0.0945624	0.20217	0.159901	0.162493	0.149303	0.214767	0.218792	0.216715	0.219251	0.212848	0.215001	0.225309	0.217513	0.194715	0.1769	0.192653	0.184454	0.198104	0.184293	0.20905	0.208362	0.206919	0.203503	0.222754	0.21537	0.201036	0.14532	0.202563	0.205788
0.200991	0.128436	0.186913	0.180511	0.197993	0.176968	0.211326	0.184476	0.201434	0.18338	0.170673	0.0881851	0.163603	0.0990708	0.190935	0.165114	0.179729	0.153884	0.209606	0.208649	0.214182	0.224363	0.208714	0.207895	0.222321	0.219099	0.194723	0.172743	0.184758	0.198061	0.184674	0.185484	0.211323	0.208238	0.208685	0.190365	0.209107	0.218547	0.194493	0.155249	0.199647	0.203431
0.189473	0.139236	0.187959	0.18268	0.188236	0.165965	0.212854	0.187565	0.193962	0.18846	0.163091	0.0834291	0.16609	0.101572	0.192213	0.16	0.181547	0.147624	0.207353	0.199544	0.213812	0.228862	0.213934	0.208339	0.230538	0.222403	0.20051	0.168121	0.198214	0.195013	0.191881	0.171314	0.201203	0.199758	0.206986	0.197471	0.225028	0.222684	0.191116	0.14321	0.218804	0.198898
0.202544	0.144184	0.200192	0.188656	0.193161	0.178354	0.215979	0.188916	0.19504	0.186643	0.161602	0.0728428	0.171255	0.104149	0.205447	0.160296	0.170236	0.14368	0.198891	0.207719	0.20638	0.217912	0.213436	0.215777	0.214732	0.219947	0.187086	0.178673	0.187589	0.192672	0.199322	0.186551	0.203479	0.198642	0.202327	0.196641	0.221369	0.220652	0.203186	0.138713	0.208855	0.198979
0.196099	0.148132	0.194325	0.18758	0.191783	0.167684	0.208089	0.170189	0.203436	0.18727	0.168206	0.0766573	0.168158	0.0973476	0.199874	0.164158	0.162515	0.157192	0.214313	0.205958	0.212941	0.217003	0.207736	0.212559	0.218261	0.230818	0.19471	0.166116	0.192389	0.191152	0.195348	0.181054	0.209799	0.202439	0.202974	0.196296	0.210502	0.215091	0.197683	0.147994	0.199976	0.206056
0.179887	0.143559	0.184458	0.188136	0.197542	0.179329	0.206819	0.182066	0.199486	0.183812	0.160963	0.0806532	0.168545	0.095253	0.192467	0.166265	0.174224	0.147627	0.214531	0.203339	0.219889	0.228377	0.219278	0.209086	0.217891	0.219185	0.196412	0.191176	0.182902	0.197905	0.211845	0.180217	0.201151	0.197209	0.210474	0.187066	0.220269	0.214147	0.190179	0.132423	0.203579	0.199733
0.186512	0.142592	0.192273	0.183284	0.19058	0.169212	0.200764	0.187634	0.203717	0.201147	0.166538	0.0794205	0.163533	0.0950493	0.199371	0.163992	0.177218	0.158446	0.212524	0.194932	0.214263	0.234865	0.206017	0.212286	0.227147	0.230826	0.194554	0.183578	0.196941	0.183539	0.201006	0.17303	0.207482	0.196712	0.20578	0.186127	0.217482	0.222113	0.182537	0.141707	0.20501	0.199973
0.197349	0.13474	0.189114	0.201798	0.203707	0.178819	0.210928	0.171864	0.209769	0.185119	0.159561	0.0726846	0.163363	0.110198	0.19221	0.157542	0.165369	0.136431	0.212736	0.202827	0.218776	0.235863	0.216218	0.208745	0.223364	0.232094	0.197795	0.172454	0.185829	0.190827	0.192534	0.181125	0.198558	0.210997	0.206246	0.188767	0.217229	0.217056	0.193737	0.140378	0.205534	0.19259
0.194243	0.140955	0.191285	0.189818	0.195806	0.175196	0.208292	0.173366	0.201397	0.18557	0.160086	0.0752043	0.162896	0.0826111	0.200874	0.159757	0.174206	0.149476	0.203985	0.198887	0.211386	0.224385	0.207796	0.218398	0.223817	0.218531	0.200872	0.187368	0.20003	0.190471	0.201798	0.176485	0.200511	0.198602	0.200027	0.188297	0.209065	0.220668	0.188956	0.141125	0.210042	0.207252
0.187963	0.146217	0.190377	0.187953	0.199523	0.178644	0.209108	0.180519	0.189586	0.186318	0.165957	0.0767732	0.155668	0.0943235	0.200302	0.159326	0.178586	0.160886	0.208857	0.213859	0.216083	0.221226	0.211524	0.212287	0.214456	0.224692	0.196287	0.179092	0.192574	0.18455	0.208602	0.187651	0.217236	0.20428	0.221995	0.193872	0.21819	0.211339	0.188857	0.141668	0.198493	0.206353
0.198584	0.141012	0.189828	0.200722	0.208925	0.183125	0.199773	0.186093	0.204399	0.195791	0.167377	0.071211	0.168884	0.102149	0.192705	0.154901	0.174678	0.147698	0.204	0.203943	0.219129	0.231637	0.215795	0.214943	0.223307	0.229589	0.194479	0.18402	0.193374	0.185681	0.198155	0.168861	0.213367	0.211616	0.201421	0.208059	0.213985	0.221507	0.204264	0.144518	0.202214	0.207062
0.192719	0.141584	0.199664	0.18793	0.195616	0.176686	0.211535	0.180177	0.1951	0.180644	0.162193	0.075154	0.163217	0.10181	0.190591	0.167274	0.169147	0.155562	0.21267	0.207484	0.203101	0.217943	0.217539	0.217686	0.220766	0.222222	0.194457	0.174034	0.196567	0.195809	0.19823	0.184252	0.20416	0.208242	0.207683	0.194722	0.220798	0.225414	0.191368	0.153017	0.216131	0.200689
0.208952	0.141119	0.197469	0.194718	0.195862	0.173518	0.201112	0.173484	0.204083	0.180916	0.161384	0.0812289	0.161948	0.0977879	0.194752	0.161851	0.169218	0.149086	0.219501	0.210731	0.213113	0.215969	0.216314	0.228288	0.22499	0.220531	0.199315	0.17571	0.198504	0.194986	0.196144	0.174226	0.199127	0.19208	0.205016	0.194832	0.21985	0.212958	0.191665	0.142301	0.199193	0.191384
0.197171	0.150731	0.190083	0.193083	0.200899	0.174402	0.208035	0.182733	0.20226	0.178818	0.149633	0.0766235	0.165172	0.0913262	0.202909	0.162675	0.177618	0.1432	0.214993	0.201165	0.220849	0.230607	0.219585	0.208649	0.222695	0.225178	0.195384	0.172667	0.193724	0.190796	0.192379	0.179091	0.213187	0.208131	0.192649	0.197525	0.217978	0.218666	0.193032	0.149897	0.203918	0.202174
0.204107	0.125023	0.187692	0.186974	0.200963	0.189491	0.207402	0.178769	0.203825	0.188839	0.166832	0.0777298	0.153495	0.0972738	0.203031	0.160008	0.168621	0.150816	0.20924	0.206057	0.208955	0.21501	0.21896	0.210416	0.217887	0.222711	0.192186	0.1712	0.18746	0.19563	0.195375	0.194321	0.204422	0.202051	0.203484	0.200317	0.223315	0.222259	0.200109	0.142369	0.196341	0.207117
0.185913	0.128333	0.180529	0.19292	0.199835	0.17574	0.202218	0.18335	0.194754	0.189626	0.159351	0.0745607	0.172223	0.0936392	0.198304	0.160323	0.166821	0.142774	0.208777	0.206262	0.218625	0.217881	0.205664	0.210166	0.221038	0.22815	0.197686	0.173015	0.207144	0.190232	0.191938	0.179427	0.193921	0.20469	0.213431	0.192341	0.226883	0.21555	0.193469	0.135312	0.201342	0.204624
0.195145	0.134063	0.185373	0.183311	0.195021	0.17238	0.200103	0.179861	0.197855	0.179721	0.175286	0.0720732	0.170654	0.103008	0.19946	0.166135	0.170042	0.155208	0.20106	0.204683	0.207483	0.222077	0.204769	0.21116	0.221577	0.212049	0.187742	0.170661	0.18554	0.191423	0.196184	0.174231	0.205784	0.207587	0.202473	0.204875	0.21542	0.220173	0.192461	0.134271	0.200666	0.196498
0.198929	0.142869	0.191994	0.185385	0.185192	0.1682	0.204022	0.186491	0.203813	0.179805	0.164645	0.0758407	0.166349	0.0888497	0.197714	0.166676	0.164167	0.14695	0.213852	0.204733	0.213276	0.225365	0.206756	0.21237	0.226326	0.223731	0.18912	0.183239	0.197126	0.184296	0.200094	0.172768	0.203228	0.194641	0.207905	0.19303	0.223886	0.21259	0.179397	0.139945	0.20489	0.206061
0.188406	0.132717	0.175263	0.181087	0.189089	0.166317	0.201402	0.169827	0.193139	0.18133	0.162484	0.0748563	0.160549	0.106382	0.202526	0.164473	0.166959	0.149488	0.217656	0.207962	0.213548	0.224057	0.213864	0.213517	0.225044	0.224465	0.19678	0.181127	0.19566	0.188585	0.209794	0.187836	0.19356	0.195643	0.204353	0.189353	0.21223	0.216133	0.178485	0.149591	0.210446	0.207134
0.194553	0.134829	0.187281	0.197909	0.195326	0.164358	0.198247	0.180858	0.203482	0.185449	0.164603	0.0711161	0.15968	0.102282	0.195454	0.168597	0.168806	0.137236	0.209047	0.202799	0.204344	0.223642	0.206217	0.215848	0.223388	0.220405	0.188164	0.182663	0.190829	0.188813	0.205429	0.18188	0.206368	0.206548	0.199715	0.193536	0.213648	0.225741	0.183558	0.131227	0.196902	0.211365
0.201666	0.134983	0.182441	0.186074	0.191656	0.177116	0.205791	0.180437	0.194601	0.18633	0.16503	0.0707872	0.160944	0.0941851	0.200265	0.159652	0.165751	0.143569	0.21246	0.208295	0.202978	0.237808	0.219272	0.222937	0.221979	0.226198	0.195088	0.16723	0.194501	0.182311	0.196836	0.179471	0.200426	0.198343	0.207869	0.19609	0.227439	0.220597	0.193308	0.143297	0.210818	0.201676
0.186038	0.132099	0.196424	0.191802	0.208063	0.173826	0.197484	0.176406	0.201763	0.195203	0.157931	0.0842465	0.162278	0.0959858	0.20015	0.167177	0.175732	0.150395	0.21527	0.214756	0.202779	0.222544	0.214789	0.217705	0.226838	0.223274	0.192945	0.176078	0.187372	0.183469	0.17758	0.178347	0.197928	0.190771	0.194775	0.194726	0.219856	0.221655	0.192897	0.142076	0.209204	0.207523
0.197809	0.136584	0.196189	0.191266	0.197089	0.177197	0.200169	0.167178	0.19093	0.177359	0.155	0.0650165	0.162111	0.0959333	0.19622	0.160493	0.17432	0.143524	0.211128	0.202261	0.218237	0.218253	0.217668	0.222016	0.23008	0.226254	0.190704	0.179784	0.197062	0.181756	0.192944	0.185243	0.198439	0.204467	0.201456	0.202914	0.217359	0.219397	0.184569	0.139588	0.205528	0.198438
0.193789	0.144528	0.184753	0.194929	0.196463	0.168671	0.20292	0.18349	0.200676	0.182173	0.154477	0.0693096	0.162344	0.0965172	0.192154	0.153913	0.171177	0.151744	0.20509	0.211462	0.208622	0.227399	0.205364	0.221035	0.222393	0.220171	0.182255	0.173225	0.196201	0.19288	0.198486	0.185756	0.191514	0.205797	0.20272	0.20509	0.216976	0.20361	0.207275	0.145536	0.203839	0.195771
0.187478	0.134931	0.187332	0.19404	0.18531	0.184717	0.200925	0.171089	0.196887	0.190341	0.169586	0.0740061	0.155864	0.0944809	0.206171	0.169758	0.167509	0.145864	0.214979	0.210429	0.215081	0.227872	0.216847	0.2107	0.215844	0.226276	0.20237	0.1791	0.185914	0.203553	0.196903	0.18114	0.207048	0.206311	0.204168	0.199363	0.219999	0.219142	0.198197	0.130774	0.209835	0.201464
0.210542	0.155095	0.188455	0.190226	0.196839	0.170685	0.202725	0.179181	0.192983	0.176024	0.156382	0.0794051	0.162819	0.0978586	0.196288	0.175314	0.174724	0.153248	0.198555	0.210747	0.221506	0.206041	0.21754	0.210459	0.216923	0.221362	0.192646	0.171813	0.183893	0.177431	0.196215	0.183618	0.203503	0.196557	0.209159	0.198508	0.217467	0.213008	0.194614	0.143579	0.203776	0.201393
0.188227	0.13727	0.193962	0.178277	0.193404	0.174144	0.203064	0.175643	0.185645	0.185049	0.156113	0.0766612	0.160642	0.0904401	0.205559	0.15795	0.180806	0.14769	0.216301	0.205075	0.205089	0.224435	0.219374	0.215682	0.217509	0.219102	0.190724	0.17874	0.190351	0.1843	0.202507	0.177812	0.203009	0.201225	0.194498	0.19952	0.219393	0.218284	0.187078	0.146483	0.203269	0.194276
0.194298	0.135686	0.181822	0.194296	0.19665	0.17944	0.207912	0.184916	0.198618	0.173336	0.155281	0.075829	0.164881	0.0974503	0.198442	0.159781	0.172415	0.144096	0.193941	0.202733	0.209446	0.227599	0.211061	0.214636	0.215786	0.217132	0.186287	0.183112	0.183763	0.191561	0.195798	0.187097	0.206461	0.206838	0.195281	0.196409	0.212268	0.219225	0.193971	0.149411	0.201772	0.203425
0.207934	0.135856	0.191985	0.195682	0.19544	0.186712	0.208154	0.176339	0.197806	0.173709	0.155713	0.0726776	0.176106	0.0912637	0.195864	0.1719	0.17509	0.152139	0.203751	0.211121	0.219464	0.213282	0.215192	0.216304	0.223866	0.224617	0.185996	0.17858	0.187582	0.178558	0.194142	0.18207	0.193397	0.200743	0.198523	0.192013	0.216623	0.225345	0.187901	0.141929	0.207989	0.207781
0.204951	0.136715	0.188828	0.194973	0.187826	0.17584	0.199965	0.182729	0.194947	0.180373	0.16315	0.0843835	0.176622	0.113544	0.187499	0.159221	0.170783	0.13123	0.205267	0.207648	0.203315	0.225533	0.203057	0.21543	0.232089	0.224026	0.192032	0.185929	0.181621	0.182287	0.202212	0.190029	0.202654	0.196922	0.207978	0.194426	0.216729	0.218441	0.193122	0.136467	0.199816	0.199756
0.187348	0.142512	0.191118	0.192597	0.204759	0.163215	0.211882	0.1788	0.192117	0.181209	0.160143	0.0711149	0.159656	0.101899	0.200453	0.15871	0.167956	0.152647	0.206232	0.2059	0.217932	0.215825	0.202265	0.217015	0.216244	0.21809	0.196778	0.178448	0.190828	0.198743	0.195815	0.17698	0.204093	0.205121	0.202824	0.188675	0.221903	0.215359	0.191739	0.142981	0.20209	0.213278
0.204872	0.147513	0.187398	0.192519	0.188882	0.178628	0.203514	0.187733	0.198408	0.184666	0.141609	0.0675475	0.162305	0.111752	0.18989	0.16165	0.169369	0.145738	0.204583	0.212924	0.199236	0.220534	0.222344	0.215117	0.220202	0.223571	0.19297	0.178309	0.180855	0.201897	0.192232	0.185582	0.209666	0.208631	0.215643	0.193075	0.222253	0.222125	0.189378	0.158715	0.205978	0.203915
0.197861	0.149993	0.175776	0.182796	0.192757	0.182034	0.221634	0.175901	0.203015	0.193653	0.167105	0.0647808	0.16663	0.106488	0.201138	0.167401	0.170839	0.137643	0.203446	0.204054	0.217477	0.22824	0.216663	0.210593	0.216927	0.211568	0.189049	0.184943	0.193883	0.18844	0.196583	0.181569	0.205099	0.19565	0.20696	0.202438	0.221182	0.226129	0.193747	0.143925	0.20842	0.205573
0.198594	0.144848	0.196299	0.189247	0.191018	0.167311	0.205008	0.171708	0.201309	0.182631	0.157449	0.063236	0.16431	0.103267	0.20061	0.162262	0.169326	0.157268	0.212097	0.202516	0.211862	0.232015	0.213124	0.207955	0.210058	0.218146	0.190606	0.180211	0.188178	0.187829	0.195809	0.182567	0.2077	0.199494	0.208829	0.199121	0.221477	0.230737	0.194269	0.144054	0.198844	0.194998
0.1817	0.141443	0.184533	0.197969	0.203978	0.16278	0.198418	0.187976	0.197539	0.18056	0.165718	0.0717712	0.170861	0.0999717	0.192452	0.161884	0.171071	0.153692	0.202181	0.213385	0.207875	0.221582	0.197494	0.202136	0.223005	0.221717	0.190498	0.179252	0.18565	0.178813	0.194016	0.17899	0.201717	0.201624	0.206279	0.188037	0.232342	0.21134	0.181661	0.149085	0.206497	0.202525
0.185358	0.131357	0.199532	0.193296	0.196541	0.181684	0.207099	0.186922	0.207027	0.182175	0.153836	0.0732471	0.162451	0.0936703	0.209018	0.167733	0.172661	0.14721	0.20897	0.207439	0.208426	0.231444	0.21137	0.201513	0.230543	0.22589	0.185181	0.176931	0.194423	0.18363	0.188374	0.172959	0.203791	0.192294	0.206549	0.201087	0.204232	0.229733	0.19783	0.146206	0.198251	0.200461
0.198309	0.137352	0.198152	0.190654	0.187615	0.163807	0.206425	0.180095	0.198708	0.180319	0.17016	0.0844712	0.158228	0.0923941	0.197857	0.161337	0.170408	0.131908	0.204131	0.21266	0.211857	0.219323	0.221503	0.211216	0.215569	0.222558	0.187436	0.180887	0.189093	0.189025	0.197437	0.185351	0.207758	0.194767	0.207493	0.195263	0.223275	0.224177	0.194471	0.149793	0.204505	0.199201
0.207177	0.132364	0.201541	0.180809	0.185613	0.166744	0.207667	0.179375	0.193957	0.173301	0.154688	0.0707112	0.163515	0.098586	0.192474	0.161227	0.162377	0.148287	0.207798	0.199534	0.216138	0.226487	0.209946	0.209491	0.22919	0.223697	0.191019	0.173269	0.179719	0.18488	0.188979	0.183695	0.197196	0.20456	0.207078	0.199834	0.221619	0.220404	0.187366	0.152896	0.212379	0.203508
0.185857	0.132496	0.187626	0.184546	0.196216	0.178717	0.209198	0.174156	0.190968	0.187243	0.16637	0.07483	0.161238	0.0930805	0.202459	0.16591	0.174172	0.14895	0.203737	0.223234	0.205383	0.220414	0.195053	0.225798	0.218699	0.227348	0.197352	0.178518	0.193712	0.196592	0.197418	0.185081	0.195823	0.207002	0.202556	0.183878	0.218334	0.221543	0.194059	0.142145	0.203255	0.202317
0.191926	0.143213	0.176304	0.189278	0.197913	0.177843	0.208076	0.17253	0.197787	0.182451	0.159535	0.0780004	0.16309	0.0952317	0.19831	0.163977	0.176115	0.143665	0.206276	0.205502	0.22076	0.223721	0.209856	0.206389	0.22487	0.228118	0.200705	0.185589	0.190126	0.191215	0.197092	0.177284	0.203246	0.194449	0.19993	0.194794	0.212643	0.22121	0.196368	0.147813	0.208634	0.19616
0.199413	0.142119	0.19247	0.192744	0.190762	0.180313	0.211435	0.178982	0.196014	0.185858	0.16582	0.0786113	0.163945	0.104252	0.206124	0.159286	0.172504	0.15135	0.210491	0.203831	0.21305	0.219064	0.20955	0.215152	0.212336	0.231926	0.199403	0.170892	0.193379	0.19063	0.195657	0.177792	0.195687	0.197264	0.208601	0.194951	0.210034	0.217487	0.188567	0.147419	0.200516	0.2039
0.193538	0.144698	0.189841	0.188993	0.195383	0.164037	0.19769	0.175934	0.199728	0.189265	0.164812	0.0762358	0.163982	0.0980233	0.210087	0.170512	0.179132	0.145587	0.21031	0.202496	0.214829	0.224392	0.21617	0.218895	0.217922	0.216082	0.195865	0.185404	0.191135	0.18886	0.198629	0.187573	0.20535	0.204113	0.210797	0.193214	0.21984	0.221403	0.184677	0.139263	0.206726	0.200988
0.18883	0.140938	0.186755	0.193877	0.198217	0.170374	0.218498	0.184009	0.202437	0.188319	0.151805	0.0750201	0.176214	0.0953604	0.199061	0.160549	0.178847	0.149269	0.211358	0.205365	0.208956	0.218792	0.213451	0.216232	0.216972	0.220245	0.193338	0.181552	0.186979	0.200144	0.205913	0.189767	0.204397	0.20682	0.20486	0.19928	0.230498	0.218207	0.191341	0.15036	0.207064	0.201373
0.199255	0.127077	0.192789	0.188557	0.20318	0.179199	0.204105	0.167131	0.195947	0.180433	0.158911	0.0738916	0.165182	0.0806987	0.18416	0.152258	0.173654	0.137201	0.217652	0.204957	0.209377	0.21509	0.212157	0.205793	0.217483	0.226187	0.198636	0.175366	0.182388	0.188016	0.202334	0.185442	0.208015	0.195823	0.21831	0.19305	0.223587	0.222765	0.18796	0.156109	0.201353	0.20809
0.182656	0.142637	0.189548	0.180513	0.188516	0.181866	0.204889	0.175461	0.187483	0.185743	0.155443	0.0775662	0.167221	0.0947647	0.195925	0.16415	0.180386	0.145219	0.209459	0.211811	0.209809	0.235892	0.211093	0.209375	0.234262	0.218705	0.196206	0.176801	0.200244	0.187166	0.197548	0.178568	0.204802	0.208232	0.206107	0.205355	0.226124	0.213018	0.186855	0.132258	0.215728	0.20636
0.198636	0.133661	0.204978	0.189552	0.195386	0.169449	0.205461	0.182827	0.198523	0.185429	0.167144	0.0858807	0.166302	0.104836	0.191414	0.166305	0.173519	0.149357	0.201605	0.200634	0.220139	0.229597	0.215606	0.227705	0.219337	0.22512	0.187428	0.180408	0.190736	0.196064	0.195	0.17722	0.199332	0.202028	0.207388	0.20142	0.226876	0.213027	0.192012	0.131504	0.206825	0.206317
0.195699	0.134126	0.188237	0.186951	0.188029	0.187777	0.206999	0.179009	0.19978	0.180756	0.157033	0.0743596	0.157079	0.0969423	0.202527	0.166589	0.174495	0.144342	0.209589	0.209123	0.220658	0.219159	0.215758	0.21482	0.220026	0.230807	0.194715	0.172085	0.192868	0.186938	0.201773	0.178212	0.205461	0.191943	0.19776	0.20207	0.23037	0.22002	0.193432	0.141532	0.202589	0.197006
0.201634	0.133156	0.184201	0.199357	0.191993	0.172398	0.208318	0.175843	0.202464	0.188667	0.160858	0.0665253	0.159511	0.0938959	0.200378	0.161523	0.168505	0.148846	0.207735	0.208046	0.211042	0.217029	0.206827	0.214666	0.21744	0.227469	0.19112	0.185158	0.197845	0.180718	0.195898	0.18624	0.217725	0.201157	0.203989	0.194961	0.22262	0.222665	0.199531	0.146406	0.210264	0.19937
0.200514	0.134214	0.188955	0.186016	0.206507	0.180705	0.208425	0.176135	0.205131	0.182261	0.16226	0.0774499	0.162669	0.105719	0.197225	0.16558	0.16901	0.152577	0.219344	0.203942	0.204885	0.22628	0.218941	0.211482	0.228879	0.222642	0.188441	0.175022	0.19028	0.1851	0.199466	0.175713	0.204116	0.205455	0.214084	0.203122	0.221454	0.221301	0.192693	0.13817	0.209019	0.209458
0.195544	0.13677	0.192724	0.187102	0.193676	0.175092	0.211404	0.174591	0.200238	0.183891	0.160296	0.0859699	0.161993	0.100875	0.19912	0.163351	0.177789	0.146927	0.203846	0.214801	0.208915	0.21983	0.218962	0.221807	0.215602	0.209805	0.191255	0.170475	0.190442	0.188231	0.191666	0.179293	0.204495	0.201373	0.212205	0.192298	0.221105	0.222476	0.199756	0.145227	0.214251	0.191456
0.198177	0.147341	0.189839	0.184865	0.198338	0.176311	0.211034	0.179971	0.197614	0.172812	0.147663	0.0805532	0.157412	0.0935859	0.201944	0.16649	0.185638	0.151691	0.203196	0.207317	0.21462	0.231958	0.218202	0.215618	0.221127	0.218521	0.196823	0.176659	0.184527	0.191917	0.198593	0.183386	0.193173	0.195748	0.211465	0.207892	0.226628	0.221741	0.189488	0.155534	0.206452	0.20919
0.184168	0.140417	0.192405	0.204631	0.185674	0.176035	0.19939	0.182404	0.199434	0.183378	0.156991	0.075703	0.160983	0.100539	0.1864	0.173307	0.167304	0.150446	0.211934	0.210406	0.216916	0.229616	0.211624	0.207628	0.224055	0.222091	0.189502	0.179222	0.196807	0.200594	0.192711	0.188685	0.195806	0.206462	0.208334	0.202351	0.223878	0.216547	0.213648	0.145396	0.201053	0.197904
0.182968	0.134676	0.184741	0.188799	0.20149	0.178498	0.208938	0.191881	0.194444	0.192439	0.159143	0.0713458	0.159247	0.0903701	0.19454	0.172018	0.174739	0.147568	0.211105	0.204629	0.214204	0.221834	0.205085	0.22279	0.225473	0.219993	0.193831	0.17525	0.187404	0.180903	0.204991	0.188891	0.211395	0.199303	0.214056	0.18934	0.222758	0.21018	0.190119	0.153198	0.206964	0.209108
0.197696	0.152418	0.192838	0.19112	0.192636	0.184477	0.203845	0.193111	0.188473	0.176064	0.165395	0.0730894	0.170256	0.100039	0.198275	0.160497	0.183962	0.159753	0.203715	0.206423	0.208996	0.210719	0.200692	0.21989	0.206733	0.223902	0.188642	0.184659	0.19993	0.18862	0.196415	0.189993	0.201002	0.196295	0.204187	0.199234	0.22222	0.225934	0.194031	0.14931	0.210535	0.211231
0.213678	0.14467	0.197495	0.183413	0.192073	0.175594	0.207057	0.17793	0.196579	0.186864	0.168662	0.0839655	0.161212	0.0886694	0.197724	0.15599	0.174545	0.144722	0.199594	0.186647	0.204877	0.227389	0.212274	0.215468	0.216239	0.213102	0.190379	0.187127	0.183043	0.194929	0.200318	0.17139	0.201261	0.195623	0.209392	0.190439	0.214885	0.216906	0.183843	0.140377	0.205619	0.213999
0.203397	0.147189	0.194644	0.195264	0.203171	0.171316	0.204229	0.177839	0.192109	0.173841	0.167303	0.079358	0.163024	0.0906312	0.195638	0.162114	0.171059	0.138231	0.216467	0.214548	0.216818	0.218798	0.2121	0.22144	0.207165	0.227409	0.191052	0.173949	0.196343	0.191491	0.187116	0.188184	0.199502	0.201183	0.211495	0.198162	0.219864	0.21041	0.192228	0.138091	0.199063	0.201224
0.208391	0.147196	0.193048	0.196129	0.198216	0.178179	0.201367	0.181798	0.211367	0.179461	0.168774	0.0812816	0.165706	0.0963944	0.187615	0.154557	0.173322	0.152713	0.198962	0.193176	0.214143	0.223233	0.204217	0.207396	0.2229	0.221337	0.19343	0.176398	0.185061	0.189621	0.199268	0.186258	0.20265	0.211419	0.210422	0.202165	0.211957	0.210003	0.190835	0.135238	0.197522	0.189853
0.203572	0.136514	0.195635	0.190139	0.196859	0.17283	0.205378	0.183627	0.207304	0.184607	0.158067	0.0727044	0.169668	0.101047	0.189386	0.164671	0.169964	0.157873	0.209383	0.200519	0.205244	0.220516	0.211052	0.214266	0.227206	0.220707	0.199772	0.181045	0.193139	0.189434	0.200058	0.172477	0.20126	0.202291	0.212123	0.203622	0.216655	0.217121	0.198764	0.137009	0.192558	0.202889
0.18535	0.149477	0.193657	0.185353	0.190862	0.182875	0.203713	0.173714	0.198267	0.182651	0.155203	0.0774183	0.164457	0.0920946	0.203144	0.173526	0.170932	0.149316	0.213094	0.206917	0.213837	0.220119	0.217593	0.206151	0.215563	0.222905	0.193502	0.183166	0.192784	0.184785	0.194281	0.192876	0.198759	0.200483	0.209977	0.198404	0.2224	0.225678	0.189073	0.151217	0.209656	0.2013
0.196589	0.137376	0.18607	0.183429	0.205002	0.174722	0.215834	0.171309	0.203558	0.189144	0.15423	0.0674914	0.160267	0.112317	0.196395	0.176536	0.169247	0.144932	0.205891	0.195184	0.202676	0.228598	0.227878	0.212184	0.21304	0.213669	0.194346	0.18132	0.178018	0.183168	0.198136	0.176466	0.206032	0.209746	0.208243	0.200604	0.224936	0.218754	0.188486	0.151899	0.198919	0.204445
0.184626	0.136958	0.1939	0.191301	0.196671	0.177551	0.206426	0.185416	0.204617	0.187017	0.167286	0.0811744	0.159049	0.101457	0.20301	0.161032	0.173264	0.157413	0.193281	0.208994	0.213897	0.210298	0.204497	0.212695	0.229525	0.220602	0.205347	0.17473	0.206652	0.183269	0.197245	0.191929	0.208983	0.201444	0.206268	0.200686	0.232085	0.21557	0.180919	0.138551	0.196972	0.198687
0.189314	0.140208	0.191517	0.185621	0.199636	0.179022	0.210941	0.175306	0.198716	0.190858	0.164433	0.0655546	0.163975	0.0967472	0.186974	0.165053	0.175022	0.138337	0.206536	0.199066	0.214135	0.220528	0.21342	0.217202	0.213818	0.216647	0.203469	0.168422	0.1896	0.177781	0.20362	0.175568	0.211206	0.201688	0.202988	0.191244	0.222817	0.222254	0.1855	0.137736	0.19533	0.201697
0.196167	0.140123	0.187912	0.192595	0.198037	0.176434	0.201039	0.17661	0.197139	0.188173	0.165229	0.0860925	0.167955	0.0891562	0.201788	0.173877	0.176523	0.150704	0.221796	0.203919	0.205871	0.232026	0.210676	0.224364	0.20637	0.226522	0.18647	0.179127	0.201546	0.192668	0.194627	0.179267	0.204376	0.198168	0.219482	0.192372	0.221212	0.222586	0.18724	0.145075	0.212322	0.190064
0.195568	0.124114	0.192677	0.184888	0.188917	0.168459	0.199514	0.177438	0.201423	0.182169	0.160433	0.0738069	0.171312	0.0950889	0.199652	0.170385	0.176249	0.154565	0.204072	0.203961	0.212969	0.226403	0.21913	0.209656	0.231218	0.224651	0.202967	0.184408	0.195787	0.18876	0.194757	0.181318	0.204554	0.204082	0.20853	0.203182	0.227343	0.230612	0.183474	0.137352	0.202799	0.200573
0.196287	0.135673	0.185223	0.177912	0.195442	0.185049	0.208339	0.167738	0.203666	0.18561	0.162276	0.0869299	0.156026	0.09525	0.202244	0.167341	0.17559	0.150599	0.209621	0.213258	0.211978	0.227604	0.202598	0.216989	0.22075	0.21866	0.187723	0.168411	0.193271	0.185053	0.194311	0.184662	0.205916	0.211582	0.208677	0.195836	0.215948	0.212769	0.191977	0.14692	0.195043	0.211638
0.195365	0.135528	0.203233	0.191318	0.195796	0.17961	0.204755	0.170099	0.199967	0.182319	0.168987	0.0619918	0.166336	0.100638	0.198282	0.159395	0.175042	0.151368	0.215218	0.212245	0.214497	0.224971	0.221095	0.208579	0.224151	0.226561	0.189872	0.171178	0.188128	0.183625	0.195122	0.188571	0.198128	0.211035	0.210024	0.197238	0.225358	0.214888	0.188647	0.141129	0.20663	0.194928
0.192782	0.132609	0.196029	0.182341	0.183586	0.177171	0.206956	0.175056	0.190882	0.173268	0.15609	0.0786444	0.162054	0.104711	0.191839	0.164582	0.173568	0.151853	0.212197	0.202221	0.207171	0.228265	0.211479	0.215133	0.219895	0.217701	0.199314	0.181213	0.205051	0.19113	0.192057	0.177451	0.213479	0.199011	0.203823	0.199601	0.222646	0.22108	0.195816	0.142604	0.206708	0.210722
0.20175	0.132739	0.186579	0.179185	0.197697	0.172717	0.19919	0.184887	0.193155	0.178574	0.169907	0.0803706	0.163263	0.0983265	0.196161	0.152998	0.171067	0.15543	0.216121	0.201984	0.216563	0.235207	0.213054	0.220866	0.210561	0.233202	0.191714	0.181689	0.184293	0.19188	0.196694	0.181376	0.201846	0.190754	0.203816	0.206404	0.225583	0.215288	0.18921	0.152388	0.211719	0.201219
0.207419	0.137848	0.186471	0.194556	0.20223	0.16975	0.205879	0.177797	0.198132	0.192283	0.162281	0.0743964	0.162202	0.0869529	0.206083	0.154585	0.178678	0.152418	0.217635	0.202541	0.216228	0.224146	0.214164	0.202388	0.225132	0.221982	0.196791	0.175156	0.196273	0.18901	0.200174	0.180246	0.21231	0.209075	0.203371	0.191877	0.230243	0.219739	0.185279	0.134698	0.204743	0.197048
0.196627	0.133902	0.191096	0.194537	0.181724	0.169387	0.210385	0.17306	0.202578	0.190186	0.16463	0.0679836	0.151636	0.106806	0.199467	0.162511	0.160943	0.144054	0.211807	0.205348	0.211043	0.237413	0.215078	0.206775	0.219117	0.229439	0.188679	0.171173	0.198353	0.187994	0.201665	0.182647	0.203974	0.209348	0.211027	0.204835	0.222767	0.222242	0.184455	0.142806	0.205608	0.210958
0.192356	0.14032	0.185973	0.184144	0.189019	0.176525	0.200736	0.17497	0.204653	0.177463	0.152058	0.0908343	0.163618	0.110408	0.199013	0.156382	0.166738	0.163417	0.211298	0.209036	0.206842	0.224281	0.209913	0.210256	0.232984	0.209581	0.181555	0.185011	0.18701	0.195812	0.184327	0.174943	0.204083	0.20064	0.207895	0.209326	0.212945	0.220458	0.189412	0.150694	0.203214	0.213009
0.194837	0.129038	0.183481	0.191972	0.187118	0.177233	0.206939	0.179612	0.198186	0.180767	0.15945	0.0714642	0.164685	0.102334	0.183322	0.164134	0.171548	0.143227	0.20583	0.208163	0.21271	0.223203	0.206527	0.208417	0.217541	0.215883	0.195949	0.166419	0.197485	0.193958	0.191617	0.18357	0.20527	0.203173	0.20003	0.202607	0.223414	0.218001	0.18814	0.143352	0.197908	0.197709
0.20269	0.143794	0.19748	0.195311	0.1901	0.174536	0.213146	0.182221	0.199577	0.190336	0.163417	0.073677	0.153789	0.103498	0.201492	0.158758	0.175229	0.149805	0.226543	0.201179	0.209746	0.23374	0.218616	0.211479	0.214898	0.222668	0.184513	0.187814	0.20136	0.185891	0.20352	0.177223	0.202416	0.202215	0.198401	0.195367	0.218898	0.222115	0.18544	0.144682	0.20432	0.206112
0.204445	0.134158	0.194012	0.189913	0.186047	0.174144	0.199083	0.173879	0.202626	0.186975	0.162708	0.0778571	0.16193	0.0883166	0.193502	0.165414	0.172456	0.150378	0.211019	0.209203	0.217949	0.231284	0.211887	0.218674	0.217945	0.218904	0.194587	0.183715	0.202754	0.190288	0.194689	0.177831	0.199002	0.208521	0.195691	0.190285	0.220261	0.223904	0.183317	0.139224	0.20786	0.202735
0.1968	0.135286	0.190216	0.189548	0.199102	0.175993	0.212191	0.184719	0.207464	0.176182	0.158665	0.0816867	0.172405	0.0848844	0.186312	0.17353	0.171499	0.153173	0.19679	0.205451	0.21547	0.22941	0.213654	0.20401	0.214328	0.23633	0.197998	0.173951	0.198293	0.190827	0.188601	0.183151	0.198737	0.199017	0.204295	0.197984	0.233338	0.22205	0.197483	0.151845	0.196073	0.209918
0.201872	0.133407	0.193066	0.183844	0.197267	0.175447	0.209964	0.180107	0.197191	0.188223	0.16731	0.0731091	0.16596	0.0986655	0.199571	0.170296	0.165853	0.138733	0.205364	0.204868	0.219052	0.233067	0.212091	0.207001	0.217645	0.225698	0.192712	0.181177	0.192562	0.198767	0.197841	0.185421	0.204099	0.200751	0.210149	0.200825	0.212196	0.213129	0.191928	0.145102	0.192276	0.205652
0.198623	0.131849	0.18765	0.189436	0.195344	0.174367	0.206828	0.188108	0.197371	0.185843	0.156819	0.0814237	0.15908	0.0963533	0.205025	0.156729	0.170638	0.147692	0.219825	0.205981	0.214556	0.222179	0.217778	0.219379	0.225841	0.221026	0.191394	0.174075	0.197972	0.194313	0.196923	0.173742	0.211761	0.218391	0.208339	0.197499	0.22095	0.222501	0.183836	0.138292	0.196244	0.213823
0.188532	0.145099	0.18956	0.186082	0.193552	0.169887	0.214372	0.189268	0.190223	0.188651	0.153569	0.0591984	0.151656	0.0907043	0.200243	0.166006	0.177008	0.149651	0.212247	0.208723	0.220379	0.215722	0.214744	0.209087	0.213232	0.222465	0.190042	0.186006	0.192948	0.186019	0.205378	0.180307	0.206282	0.200623	0.203175	0.205248	0.216202	0.21987	0.199329	0.142941	0.199343	0.196216
0.189651	0.140833	0.196114	0.189629	0.193158	0.162998	0.207283	0.184227	0.204018	0.190871	0.172467	0.070842	0.159692	0.097255	0.201609	0.164044	0.163755	0.150402	0.197447	0.20896	0.220175	0.235027	0.209451	0.220354	0.2264	0.220806	0.189272	0.176114	0.186127	0.197833	0.199988	0.178227	0.196092	0.203517	0.198707	0.195074	0.219087	0.218999	0.189161	0.144143	0.209473	0.200227
0.19169	0.136816	0.182053	0.189964	0.19684	0.168711	0.203851	0.177757	0.195236	0.190773	0.161866	0.0757621	0.153599	0.0909746	0.193554	0.1645	0.172783	0.153368	0.199593	0.210623	0.215591	0.223316	0.211861	0.208884	0.222786	0.216129	0.191737	0.181102	0.193186	0.189305	0.198577	0.1768	0.202411	0.205035	0.203986	0.194127	0.219096	0.220592	0.188727	0.148521	0.199481	0.200323
0.194613	0.133068	0.191444	0.180885	0.193811	0.178855	0.206138	0.183666	0.203048	0.193769	0.163688	0.078411	0.160122	0.0973909	0.194265	0.170059	0.180241	0.152787	0.202348	0.199701	0.207327	0.222816	0.214776	0.213711	0.216163	0.224616	0.207015	0.176727	0.19592	0.204886	0.196558	0.184494	0.206388	0.209776	0.206266	0.195896	0.215287	0.221031	0.192935	0.143837	0.200407	0.199579
0.188107	0.147249	0.19072	0.173318	0.204647	0.181059	0.199401	0.183826	0.196019	0.184735	0.165332	0.0738904	0.168682	0.100925	0.200112	0.150576	0.1786	0.138945	0.207436	0.215306	0.221078	0.228937	0.209372	0.208515	0.225981	0.23534	0.200696	0.171819	0.196972	0.202383	0.197461	0.174518	0.204676	0.208163	0.212798	0.193894	0.212087	0.22209	0.179801	0.149556	0.206826	0.210855
0.198672	0.150057	0.192155	0.195103	0.185031	0.173387	0.21051	0.185058	0.190467	0.184823	0.157466	0.0741271	0.161693	0.101079	0.201145	0.158867	0.171596	0.149356	0.209817	0.205773	0.211645	0.22869	0.212656	0.216716	0.225321	0.216405	0.189085	0.17751	0.197679	0.192315	0.191536	0.17644	0.198448	0.209417	0.20047	0.189815	0.222724	0.217457	0.194243	0.150867	0.196806	0.204921
0.189725	0.142858	0.196571	0.190155	0.19867	0.171365	0.197382	0.177683	0.196063	0.185755	0.157407	0.0720481	0.162846	0.0831644	0.195193	0.173528	0.185186	0.139802	0.211553	0.208761	0.215342	0.219796	0.206454	0.20814	0.220806	0.219559	0.201769	0.170981	0.200779	0.192435	0.194481	0.177827	0.210005	0.201024	0.216867	0.204825	0.226612	0.225865	0.207134	0.149947	0.203051	0.198621
0.195134	0.14611	0.189233	0.18876	0.190633	0.184009	0.205418	0.168557	0.190257	0.188257	0.154093	0.0835873	0.172464	0.088708	0.197595	0.173513	0.166628	0.142971	0.211203	0.197182	0.215557	0.21929	0.213922	0.21455	0.215544	0.229231	0.196285	0.182035	0.193031	0.182212	0.201663	0.172265	0.199289	0.19334	0.207566	0.196944	0.22025	0.221836	0.195728	0.142236	0.203225	0.203821
0.193739	0.135925	0.197847	0.190939	0.195144	0.175301	0.207637	0.174507	0.205972	0.168443	0.164588	0.0802358	0.16139	0.100817	0.200769	0.165761	0.174358	0.144679	0.205675	0.200751	0.21273	0.229844	0.205492	0.207987	0.225995	0.217937	0.19061	0.188682	0.194035	0.19326	0.19641	0.18381	0.204002	0.205261	0.214062	0.197994	0.214892	0.213573	0.185897	0.14107	0.209098	0.202333
0.206054	0.14832	0.199261	0.185031	0.192399	0.180246	0.200754	0.179605	0.200907	0.186235	0.170864	0.0775815	0.162552	0.0954687	0.181338	0.152194	0.177194	0.146201	0.199512	0.206636	0.216715	0.21855	0.210351	0.206238	0.217481	0.222677	0.198688	0.181036	0.191673	0.192177	0.200591	0.187558	0.198363	0.205819	0.208135	0.195672	0.221007	0.212963	0.199536	0.134753	0.205013	0.198378
0.196959	0.147298	0.187639	0.177775	0.184882	0.169169	0.204515	0.184034	0.190501	0.190042	0.169087	0.0621775	0.166938	0.0926531	0.196492	0.151872	0.16862	0.138372	0.210646	0.198568	0.209721	0.210931	0.20862	0.203281	0.221584	0.227705	0.200935	0.182147	0.192513	0.196523	0.202869	0.182984	0.217797	0.198175	0.211165	0.196271	0.219309	0.213467	0.186189	0.154678	0.210141	0.202533
0.206424	0.145011	0.191691	0.19242	0.192561	0.170077	0.195911	0.182678	0.192955	0.181353	0.163428	0.0702719	0.174175	0.105122	0.199101	0.169095	0.168002	0.161681	0.214619	0.199837	0.211969	0.221705	0.211055	0.21593	0.226819	0.216294	0.183049	0.170884	0.190948	0.195688	0.193445	0.179085	0.206085	0.209488	0.213714	0.192024	0.205604	0.221649	0.198562	0.147497	0.210552	0.204175
0.197824	0.152553	0.196462	0.189726	0.193331	0.17975	0.203739	0.172937	0.194207	0.185354	0.172641	0.0712587	0.157931	0.0915791	0.204217	0.165628	0.168288	0.135531	0.203736	0.211125	0.217671	0.218841	0.207558	0.216625	0.222206	0.223933	0.194139	0.184773	0.190562	0.200721	0.198289	0.170616	0.207701	0.201784	0.209535	0.200082	0.224952	0.213917	0.199979	0.148339	0.207105	0.206195
0.194048	0.147722	0.185171	0.190623	0.189651	0.170898	0.205023	0.182886	0.200981	0.185754	0.155911	0.0766505	0.157621	0.0938908	0.198674	0.172485	0.173017	0.152289	0.210805	0.21173	0.20328	0.221896	0.214594	0.212719	0.232004	0.220812	0.186005	0.178218	0.200251	0.188654	0.202296	0.186679	0.204173	0.20502	0.218793	0.197698	0.220989	0.215962	0.19237	0.147592	0.191977	0.189761
0.188862	0.129618	0.188997	0.19712	0.197547	0.172022	0.206142	0.173264	0.21748	0.187262	0.155687	0.075157	0.159776	0.107244	0.191754	0.162734	0.163625	0.145792	0.206417	0.201263	0.209218	0.232573	0.208192	0.210796	0.224702	0.22091	0.185366	0.173996	0.186018	0.195792	0.193676	0.175302	0.20367	0.195542	0.208517	0.191849	0.222123	0.216589	0.194081	0.145472	0.195872	0.203183
0.191672	0.133744	0.18726	0.185161	0.199363	0.173566	0.1987	0.178507	0.188589	0.171319	0.154424	0.0843658	0.169973	0.107066	0.190619	0.158551	0.170227	0.146429	0.208203	0.202333	0.217478	0.227822	0.20974	0.221308	0.224467	0.213526	0.194591	0.175637	0.194008	0.193297	0.200817	0.178239	0.203977	0.196654	0.20474	0.199174	0.215312	0.220986	0.198319	0.148208	0.209624	0.199557
0.193791	0.137634	0.186416	0.184065	0.202209	0.175111	0.206142	0.181909	0.205022	0.18642	0.162035	0.0767581	0.1587	0.0952417	0.203177	0.169652	0.176214	0.148419	0.211138	0.21049	0.2162	0.224788	0.211749	0.207805	0.225485	0.227149	0.191395	0.183473	0.188347	0.188435	0.205981	0.177869	0.215252	0.188908	0.210032	0.198729	0.221483	0.217119	0.196685	0.15154	0.213259	0.207053
0.205332	0.133963	0.189327	0.188394	0.189536	0.165923	0.201557	0.178882	0.205664	0.189948	0.157638	0.079568	0.169783	0.0971871	0.194327	0.161658	0.17402	0.151079	0.218002	0.216585	0.216989	0.222552	0.20519	0.221019	0.218477	0.212408	0.187994	0.17429	0.197555	0.193057	0.203543	0.171211	0.205671	0.199284	0.207194	0.198546	0.219367	0.224648	0.191954	0.143965	0.19387	0.205079
0.188714	0.141496	0.190866	0.186883	0.198135	0.184815	0.203117	0.188397	0.195974	0.185654	0.157769	0.0740341	0.164333	0.0970684	0.196606	0.167338	0.177243	0.154182	0.207263	0.210843	0.214361	0.219039	0.212602	0.220464	0.220466	0.225628	0.183172	0.17744	0.190017	0.188487	0.186533	0.179005	0.208474	0.197523	0.208015	0.194314	0.222161	0.225942	0.18187	0.14652	0.206803	0.201752
0.201194	0.145095	0.197255	0.196115	0.202432	0.172448	0.19446	0.180378	0.202535	0.185438	0.16553	0.0665381	0.161935	0.0958486	0.199644	0.159001	0.168194	0.156868	0.210314	0.219159	0.203797	0.226162	0.214709	0.214857	0.223865	0.226568	0.188503	0.186945	0.189053	0.184044	0.191131	0.180689	0.198343	0.200036	0.205881	0.207034	0.222734	0.229266	0.187159	0.147577	0.193002	0.202114
0.191051	0.135622	0.186637	0.178096	0.189528	0.177593	0.204308	0.179896	0.19755	0.192045	0.153454	0.0748668	0.162166	0.0993041	0.197756	0.159163	0.164609	0.143032	0.210396	0.203446	0.208318	0.228912	0.211671	0.213638	0.22793	0.226249	0.192361	0.173054	0.185244	0.186318	0.192102	0.180475	0.207626	0.203813	0.215423	0.191641	0.218003	0.219455	0.202811	0.157377	0.189337	0.212942
0.198437	0.13885	0.185077	0.195633	0.19076	0.176611	0.203461	0.173765	0.197566	0.174123	0.155252	0.0784328	0.158666	0.0941177	0.195478	0.165123	0.182222	0.155392	0.20168	0.20307	0.220835	0.224019	0.218241	0.203163	0.224361	0.21263	0.199476	0.171127	0.188572	0.202486	0.205764	0.184552	0.209338	0.205236	0.205569	0.191856	0.218773	0.21811	0.191007	0.146742	0.202667	0.20057
0.191705	0.139863	0.189798	0.182467	0.198955	0.177145	0.195576	0.175963	0.200043	0.183445	0.16999	0.0836349	0.149751	0.0945007	0.199444	0.15983	0.166722	0.1474	0.210974	0.203117	0.21755	0.218991	0.211406	0.216984	0.227432	0.222524	0.191295	0.179936	0.18994	0.18683	0.191517	0.187165	0.207624	0.210395	0.214573	0.193574	0.224541	0.223557	0.186604	0.146047	0.199423	0.211371
0.194954	0.145794	0.180156	0.198827	0.188632	0.169414	0.207808	0.172115	0.210262	0.192755	0.165505	0.0772152	0.157038	0.0962308	0.19349	0.166419	0.179017	0.152197	0.203895	0.204012	0.209244	0.21173	0.206107	0.220035	0.211344	0.220243	0.194449	0.175081	0.187182	0.184237	0.190856	0.190056	0.194032	0.197499	0.204189	0.194021	0.225454	0.219815	0.179451	0.132525	0.206579	0.197554
0.192477	0.150451	0.198975	0.19119	0.188138	0.184871	0.202284	0.176099	0.193293	0.173664	0.153942	0.0716944	0.152448	0.0968319	0.18685	0.166348	0.16616	0.146556	0.218428	0.199077	0.207381	0.227379	0.211056	0.209036	0.218876	0.226025	0.198507	0.176533	0.187574	0.187301	0.193959	0.178205	0.199083	0.198464	0.203361	0.202453	0.226821	0.221278	0.197241	0.145112	0.210833	0.205009
0.191852	0.148245	0.194458	0.194586	0.194796	0.180495	0.211558	0.18686	0.195833	0.196459	0.163381	0.0800122	0.169025	0.104007	0.190811	0.167086	0.177047	0.146982	0.208103	0.212498	0.209129	0.219335	0.200414	0.218129	0.213189	0.220629	0.187255	0.180439	0.195381	0.191643	0.199255	0.189043	0.209054	0.208936	0.208402	0.198863	0.215164	0.21133	0.18094	0.140451	0.205453	0.200617
0.20387	0.148899	0.20309	0.188876	0.196501	0.176546	0.201818	0.168693	0.204507	0.191127	0.152943	0.0787844	0.162459	0.104753	0.197732	0.15738	0.168242	0.1366	0.210718	0.209059	0.218224	0.221609	0.203861	0.214443	0.228098	0.228174	0.191477	0.172545	0.1896	0.198364	0.197279	0.180999	0.210455	0.203244	0.208659	0.198974	0.22839	0.219015	0.194323	0.149928	0.206602	0.195284
0.198074	0.134859	0.186569	0.191795	0.187648	0.176351	0.205919	0.189015	0.201906	0.179008	0.157525	0.0726595	0.162008	0.10904	0.197116	0.157539	0.178258	0.142796	0.201007	0.204668	0.220268	0.230785	0.212446	0.218405	0.232997	0.227284	0.194485	0.179421	0.189298	0.18934	0.201369	0.180694	0.19332	0.212976	0.199143	0.189867	0.216356	0.220561	0.196345	0.147548	0.19977	0.201723
0.192012	0.138667	0.183311	0.185845	0.210411	0.186029	0.19316	0.184469	0.180059	0.190059	0.16274	0.0764081	0.168236	0.0915431	0.192981	0.169591	0.173461	0.152427	0.214818	0.205108	0.210069	0.224268	0.219698	0.217097	0.229667	0.226694	0.191547	0.177329	0.184173	0.190536	0.199621	0.172343	0.209023	0.195001	0.204752	0.207595	0.220454	0.219704	0.197612	0.144324	0.211328	0.211162
0.191562	0.152096	0.188715	0.182363	0.186113	0.176769	0.200096	0.172277	0.191236	0.188625	0.164481	0.0706861	0.158212	0.0981606	0.195899	0.161391	0.171733	0.145977	0.212086	0.208103	0.21996	0.218851	0.213916	0.217011	0.213329	0.216854	0.195124	0.174844	0.191003	0.184076	0.202829	0.185239	0.204117	0.198231	0.213656	0.197581	0.205994	0.222323	0.182431	0.147594	0.214617	0.205222
0.204947	0.13511	0.197975	0.19301	0.188493	0.170443	0.205756	0.177907	0.201488	0.181579	0.164404	0.0753147	0.159783	0.0986289	0.191076	0.167389	0.175064	0.151743	0.204829	0.193991	0.209945	0.215144	0.212539	0.207696	0.223042	0.22428	0.196391	0.180586	0.189194	0.192366	0.199594	0.1752	0.211467	0.202257	0.220946	0.184511	0.214383	0.222929	0.200857	0.141514	0.206634	0.205417
0.195726	0.134298	0.189742	0.184387	0.198417	0.176708	0.206174	0.174026	0.193151	0.181167	0.161804	0.0806994	0.168015	0.0971359	0.185184	0.163366	0.160629	0.149445	0.206635	0.211469	0.208482	0.227862	0.203346	0.201065	0.21952	0.216172	0.186886	0.177913	0.184146	0.188608	0.184557	0.170388	0.195691	0.203016	0.216519	0.195963	0.215928	0.223239	0.194733	0.144387	0.198978	0.22054
0.193147	0.146231	0.192297	0.193777	0.190131	0.177463	0.1981	0.166308	0.197724	0.194829	0.157944	0.0630205	0.165637	0.0893998	0.187721	0.159633	0.169639	0.147992	0.215014	0.205603	0.203322	0.22517	0.213539	0.206434	0.225961	0.218319	0.194998	0.178206	0.20052	0.186841	0.194296	0.176213	0.199922	0.193421	0.206624	0.192724	0.223444	0.219019	0.196257	0.143724	0.204414	0.205888
0.196735	0.145384	0.200669	0.186373	0.192483	0.17274	0.208201	0.178686	0.194856	0.178758	0.159839	0.0735815	0.168737	0.106643	0.192064	0.154968	0.17561	0.143656	0.206761	0.207111	0.215734	0.222229	0.210675	0.202129	0.221884	0.22327	0.185485	0.176316	0.192393	0.180451	0.199254	0.178984	0.203356	0.193596	0.217588	0.204478	0.225528	0.221995	0.190102	0.150431	0.206457	0.194108
0.208143	0.137104	0.185756	0.177023	0.186288	0.173427	0.208626	0.183563	0.195001	0.179244	0.155539	0.072343	0.159507	0.0919603	0.198009	0.151123	0.165575	0.14542	0.209839	0.213298	0.210092	0.222117	0.206494	0.203362	0.224684	0.221642	0.187387	0.169766	0.19646	0.182584	0.211858	0.178988	0.204552	0.203301	0.20554	0.199709	0.218854	0.215595	0.184825	0.15223	0.194358	0.188155
0.18265	0.135561	0.191677	0.178381	0.191854	0.185652	0.20695	0.177965	0.204248	0.18011	0.15405	0.0713765	0.157878	0.0970749	0.193237	0.165758	0.178665	0.15008	0.211476	0.200535	0.214922	0.227529	0.210258	0.205818	0.220605	0.232181	0.198772	0.183783	0.199504	0.196845	0.200374	0.171538	0.202783	0.207124	0.209715	0.197751	0.219177	0.210675	0.184692	0.142047	0.206813	0.197617
0.193983	0.128723	0.188628	0.184855	0.19503	0.168558	0.199708	0.174179	0.185121	0.19013	0.15501	0.0744732	0.163477	0.0912261	0.193959	0.156246	0.166127	0.138568	0.219583	0.202484	0.214293	0.225992	0.204955	0.219598	0.224736	0.22133	0.192753	0.172845	0.189567	0.191355	0.198779	0.17415	0.203835	0.207144	0.21919	0.197604	0.219515	0.213987	0.190768	0.143386	0.201002	0.209979
0.199557	0.146563	0.190037	0.192515	0.207908	0.182115	0.211314	0.184369	0.202076	0.184773	0.169439	0.0822712	0.164703	0.101588	0.194334	0.149645	0.177002	0.1444	0.214139	0.201014	0.214627	0.234272	0.215501	0.209374	0.220579	0.222104	0.194888	0.168819	0.197957	0.189308	0.203601	0.189381	0.200901	0.198726	0.208948	0.200571	0.219873	0.221391	0.201248	0.148034	0.210914	0.206009
0.199739	0.144107	0.187183	0.194371	0.181864	0.168039	0.211763	0.179892	0.194478	0.184304	0.163109	0.0718016	0.159407	0.104946	0.19585	0.163213	0.175598	0.159216	0.221602	0.213338	0.208331	0.214695	0.215654	0.21898	0.215115	0.217601	0.192584	0.18346	0.19521	0.18795	0.196942	0.184827	0.203581	0.206773	0.220344	0.186541	0.216304	0.199966	0.188344	0.145604	0.204952	0.206934
0.193714	0.13068	0.18869	0.185313	0.197739	0.175457	0.216814	0.176723	0.192501	0.182765	0.173219	0.0814652	0.150326	0.092759	0.196136	0.168864	0.176334	0.155146	0.212343	0.210307	0.194169	0.222956	0.211862	0.207183	0.220672	0.223889	0.199518	0.175504	0.19158	0.194574	0.193449	0.182682	0.201098	0.205395	0.206492	0.203918	0.217343	0.212153	0.183189	0.139292	0.194061	0.209646
0.201778	0.140114	0.187711	0.172156	0.19372	0.175145	0.201839	0.177176	0.202719	0.192282	0.156721	0.078901	0.160244	0.0976983	0.181821	0.160269	0.168654	0.136869	0.204282	0.212676	0.200021	0.223389	0.202777	0.208767	0.214161	0.23339	0.193527	0.17839	0.201754	0.180195	0.204697	0.188588	0.201033	0.202981	0.200334	0.186365	0.225015	0.218202	0.19122	0.144363	0.199181	0.192303
0.207818	0.140555	0.188733	0.194489	0.199207	0.182982	0.200286	0.182131	0.209596	0.17586	0.163269	0.0671122	0.165307	0.105297	0.200598	0.154616	0.170841	0.152768	0.205268	0.205383	0.209066	0.217162	0.212449	0.211227	0.213464	0.229665	0.197219	0.181563	0.191599	0.176425	0.200096	0.173833	0.199435	0.197539	0.21407	0.197449	0.216462	0.225596	0.189363	0.140302	0.202178	0.210794
0.19645	0.131516	0.19264	0.188436	0.188569	0.171657	0.202372	0.177445	0.198987	0.174097	0.163186	0.0624388	0.16311	0.105494	0.199257	0.16775	0.178241	0.155121	0.215478	0.196067	0.222619	0.205919	0.202937	0.21261	0.215551	0.215734	0.184904	0.180118	0.19797	0.196644	0.191319	0.175825	0.197156	0.19301	0.205132	0.193676	0.226693	0.219222	0.193984	0.1455	0.204371	0.197937
0.189503	0.133233	0.19371	0.197686	0.194046	0.179376	0.201347	0.177326	0.196968	0.188921	0.158627	0.0929323	0.152086	0.0889425	0.189221	0.163784	0.174644	0.146516	0.208689	0.207477	0.219047	0.22369	0.211194	0.207499	0.214734	0.222261	0.189986	0.177119	0.186066	0.188009	0.191603	0.177883	0.215246	0.196489	0.211569	0.191794	0.212865	0.216259	0.190612	0.133194	0.206981	0.200896
0.198297	0.150665	0.196434	0.183071	0.190226	0.177782	0.212343	0.170599	0.204276	0.187635	0.157859	0.0825594	0.156315	0.0954459	0.196438	0.17571	0.178933	0.159566	0.21117	0.212757	0.217099	0.229631	0.212841	0.219225	0.216876	0.234421	0.192865	0.187564	0.199529	0.194782	0.197313	0.176124	0.205805	0.210103	0.215782	0.196255	0.21006	0.213087	0.186546	0.150098	0.199766	0.196364
0.195829	0.144247	0.184231	0.183223	0.195775	0.176897	0.199619	0.17654	0.206726	0.191266	0.159624	0.0756109	0.164168	0.0868071	0.188946	0.172877	0.174053	0.147305	0.2165	0.213555	0.209938	0.235228	0.208302	0.21162	0.211623	0.223178	0.200015	0.177016	0.198785	0.182114	0.202927	0.158787	0.200091	0.208836	0.206044	0.205146	0.217065	0.211522	0.190481	0.147083	0.209035	0.201719
0.191133	0.142603	0.192247	0.185983	0.195687	0.179095	0.208091	0.178606	0.203702	0.183964	0.164892	0.0720065	0.172107	0.100585	0.191692	0.149347	0.157997	0.159297	0.201149	0.213787	0.217765	0.22025	0.204398	0.216376	0.218211	0.222251	0.182656	0.169419	0.197825	0.18883	0.20472	0.17391	0.210713	0.197858	0.201475	0.188962	0.223289	0.218479	0.192471	0.14049	0.199326	0.207888
0.182426	0.146254	0.193604	0.189543	0.201008	0.181514	0.217809	0.184992	0.19957	0.176523	0.153962	0.0742364	0.158333	0.108437	0.198631	0.16492	0.179334	0.148416	0.197741	0.205933	0.223003	0.216514	0.208813	0.212199	0.21188	0.210053	0.192624	0.1831	0.195495	0.189678	0.210753	0.172542	0.207047	0.196904	0.206688	0.199914	0.220595	0.216491	0.18916	0.149289	0.208412	0.211177
0.201375	0.136236	0.194745	0.193177	0.199261	0.177418	0.202447	0.1733	0.186879	0.19513	0.161277	0.073718	0.164975	0.0904289	0.196702	0.154719	0.174947	0.143972	0.207305	0.211365	0.204345	0.223247	0.210841	0.2181	0.23281	0.219334	0.18861	0.173897	0.185098	0.191103	0.18803	0.189108	0.207044	0.198137	0.202658	0.196113	0.212457	0.213146	0.193831	0.147705	0.212316	0.195107
0.20391	0.14586	0.1971	0.193596	0.196665	0.176411	0.199573	0.189183	0.197076	0.180481	0.16237	0.0780931	0.163689	0.0955701	0.193342	0.153461	0.171819	0.151992	0.208973	0.211646	0.217593	0.2204	0.212078	0.21485	0.219047	0.22522	0.194807	0.174478	0.185995	0.186142	0.201147	0.185315	0.204904	0.203006	0.20684	0.199824	0.227937	0.224864	0.191776	0.14975	0.197939	0.203013
0.195317	0.151164	0.203265	0.18086	0.20532	0.176773	0.213008	0.190396	0.205213	0.176676	0.155719	0.0733446	0.161946	0.103105	0.205209	0.165691	0.173289	0.139682	0.206259	0.210043	0.218441	0.222313	0.207822	0.206092	0.229855	0.219885	0.180362	0.163472	0.199684	0.192699	0.191288	0.181725	0.210471	0.206697	0.203153	0.197445	0.218532	0.204803	0.189097	0.140066	0.213393	0.201129
0.207133	0.141128	0.190198	0.188194	0.204023	0.183856	0.197297	0.181415	0.194479	0.186023	0.161499	0.0686593	0.159037	0.0966686	0.196976	0.160965	0.182304	0.156676	0.209438	0.214722	0.219331	0.229727	0.224232	0.215574	0.216774	0.225115	0.197961	0.18027	0.192448	0.188395	0.193859	0.181156	0.193502	0.191881	0.216322	0.192418	0.220701	0.219589	0.188159	0.140751	0.205014	0.192082
0.198152	0.146833	0.183088	0.182264	0.184802	0.181988	0.210976	0.184496	0.191146	0.186102	0.160478	0.0782525	0.159677	0.107258	0.202286	0.165431	0.167672	0.155973	0.207676	0.214614	0.204388	0.22193	0.222625	0.206879	0.21193	0.223705	0.201891	0.190864	0.198875	0.19059	0.187552	0.183695	0.21163	0.200805	0.2032	0.192806	0.223653	0.225953	0.185151	0.143225	0.213217	0.198229
0.19605	0.142054	0.199009	0.179394	0.19835	0.177694	0.204243	0.174738	0.200507	0.193399	0.165161	0.067408	0.159352	0.0889827	0.206677	0.160518	0.167922	0.147711	0.216652	0.211263	0.210558	0.223302	0.21327	0.216659	0.22119	0.221759	0.192769	0.179589	0.19321	0.194568	0.201617	0.182492	0.208087	0.193209	0.202298	0.204594	0.223463	0.214239	0.184062	0.138143	0.207932	0.198965
0.192954	0.154707	0.188043	0.180455	0.202222	0.174546	0.209605	0.1845	0.189355	0.190757	0.167641	0.0726274	0.154315	0.10096	0.200488	0.16926	0.166442	0.149593	0.197137	0.214542	0.217561	0.218655	0.226032	0.204359	0.223482	0.226283	0.192678	0.186358	0.194351	0.190353	0.198165	0.177194	0.210191	0.196452	0.201781	0.19629	0.212106	0.209659	0.198411	0.141659	0.204325	0.195992
0.186082	0.141486	0.202651	0.181268	0.197361	0.184526	0.206275	0.175901	0.199076	0.181482	0.164256	0.0712969	0.160198	0.101794	0.197659	0.161891	0.165422	0.143379	0.207509	0.201512	0.214459	0.223882	0.20765	0.207358	0.22234	0.22921	0.198464	0.179829	0.193162	0.185545	0.19441	0.182879	0.198207	0.201273	0.20609	0.190535	0.216312	0.215095	0.18016	0.139953	0.206512	0.204843
0.193251	0.125831	0.188588	0.191037	0.191529	0.177644	0.210499	0.181281	0.208501	0.180119	0.157774	0.0774903	0.153314	0.0917493	0.194824	0.160373	0.172435	0.138817	0.213058	0.208674	0.210584	0.23577	0.21292	0.215589	0.223675	0.228274	0.201102	0.175917	0.193276	0.181718	0.202358	0.184234	0.19802	0.202973	0.203127	0.207753	0.222463	0.215105	0.200057	0.134919	0.201506	0.211572
0.191874	0.144479	0.178452	0.187455	0.197349	0.173481	0.199904	0.183479	0.19612	0.192182	0.163487	0.0849248	0.162418	0.0967968	0.198268	0.162313	0.170053	0.140271	0.206454	0.204129	0.211129	0.22396	0.214224	0.208654	0.226227	0.224955	0.193073	0.173958	0.19506	0.19301	0.208351	0.180135	0.191106	0.200262	0.219919	0.188465	0.215128	0.223635	0.192097	0.137461	0.196161	0.20136
0.197359	0.137156	0.194169	0.191357	0.196414	0.184217	0.199896	0.182065	0.206112	0.183115	0.163017	0.0779588	0.16945	0.0991844	0.189672	0.156896	0.180045	0.148656	0.224057	0.203831	0.215632	0.2321	0.219523	0.203621	0.225714	0.225098	0.204408	0.178711	0.190922	0.196499	0.190076	0.18233	0.208351	0.194801	0.213485	0.200104	0.217229	0.214933	0.201136	0.152824	0.20566	0.192586
0.188217	0.146794	0.187762	0.193985	0.197058	0.171761	0.205032	0.179516	0.205738	0.184726	0.165561	0.0685065	0.162129	0.10416	0.201028	0.165041	0.176491	0.145235	0.20071	0.208065	0.211404	0.23077	0.210513	0.214756	0.22193	0.223587	0.192615	0.174944	0.194239	0.195119	0.193305	0.185741	0.207503	0.207945	0.198124	0.192442	0.217192	0.216973	0.202378	0.143894	0.211599	0.203974
0.190497	0.148128	0.187329	0.178503	0.193413	0.186606	0.206621	0.176173	0.2026	0.183497	0.156449	0.0803034	0.167092	0.0843309	0.202857	0.163734	0.169203	0.140824	0.208343	0.209811	0.211624	0.22068	0.207048	0.208167	0.222743	0.227314	0.198619	0.17706	0.195835	0.194518	0.195381	0.173407	0.211692	0.209646	0.20907	0.202968	0.227178	0.213346	0.189101	0.146341	0.204679	0.195697
0.204805	0.140369	0.183484	0.189222	0.195225	0.171124	0.199362	0.178496	0.205929	0.179655	0.155643	0.0738873	0.171224	0.0897008	0.204662	0.164983	0.18191	0.154084	0.206188	0.204464	0.216939	0.221064	0.214837	0.215664	0.21069	0.22392	0.190665	0.173354	0.193083	0.18266	0.19472	0.188359	0.201257	0.202557	0.212248	0.201478	0.220009	0.212226	0.179832	0.144645	0.202816	0.198096
0.19468	0.139513	0.196709	0.187612	0.199371	0.180683	0.208739	0.175936	0.200041	0.187242	0.156012	0.063437	0.161154	0.100164	0.197188	0.165702	0.172502	0.138607	0.216023	0.196017	0.213403	0.221255	0.21003	0.207625	0.221696	0.230293	0.19679	0.189021	0.195759	0.185367	0.202058	0.188247	0.197726	0.205046	0.206532	0.200007	0.209986	0.218141	0.202503	0.142295	0.202927	0.198676
0.195468	0.133631	0.197964	0.193357	0.20099	0.169265	0.210863	0.174149	0.198742	0.180001	0.162318	0.0771414	0.158061	0.100385	0.200967	0.159451	0.163346	0.153148	0.218497	0.206752	0.216619	0.224413	0.211889	0.224113	0.213389	0.234114	0.188289	0.174158	0.191279	0.194008	0.200895	0.18425	0.199791	0.202642	0.200067	0.205116	0.224293	0.216131	0.184785	0.145628	0.203569	0.196643
0.206594	0.142914	0.193723	0.185628	0.196321	0.177245	0.204662	0.179824	0.193275	0.185306	0.155346	0.0749906	0.168519	0.0909899	0.191799	0.162161	0.16955	0.156489	0.212357	0.212001	0.208707	0.227254	0.21238	0.213644	0.220558	0.234709	0.196587	0.177518	0.197445	0.199607	0.19935	0.183691	0.210777	0.194991	0.211615	0.203573	0.226049	0.215512	0.195084	0.140131	0.210125	0.201939
0.187822	0.134997	0.188207	0.196571	0.194523	0.163881	0.210186	0.177946	0.18894	0.179224	0.162389	0.0712151	0.169541	0.0809662	0.197848	0.170855	0.181079	0.138945	0.218405	0.2183	0.21596	0.228281	0.213826	0.211851	0.229841	0.233193	0.193395	0.178896	0.189468	0.185296	0.202472	0.182007	0.201741	0.210341	0.203005	0.194176	0.227196	0.212113	0.185059	0.137771	0.206008	0.199249
0.199472	0.142337	0.191109	0.20908	0.186252	0.179935	0.202283	0.184657	0.204057	0.178633	0.174296	0.0704312	0.155304	0.0889916	0.190185	0.164284	0.167118	0.150447	0.199515	0.202891	0.208255	0.222862	0.215934	0.211642	0.225008	0.226795	0.186968	0.173368	0.191617	0.188328	0.201451	0.174407	0.197539	0.198216	0.220548	0.199892	0.231736	0.217526	0.192189	0.151048	0.208512	0.212435
0.196896	0.148625	0.194324	0.191423	0.195357	0.169451	0.193884	0.171427	0.206648	0.181105	0.154133	0.0779819	0.171344	0.0940581	0.198609	0.167085	0.171417	0.159295	0.21399	0.207656	0.209557	0.229077	0.213477	0.212831	0.234974	0.234166	0.203002	0.174729	0.191651	0.198578	0.201742	0.169946	0.199837	0.205448	0.219714	0.196258	0.221484	0.217389	0.192611	0.142379	0.202966	0.207464
0.211091	0.147194	0.173703	0.179864	0.194114	0.172474	0.195285	0.168964	0.205506	0.177663	0.15702	0.0807866	0.160298	0.0853339	0.18989	0.170037	0.17752	0.158541	0.218671	0.214668	0.210721	0.217868	0.209244	0.212744	0.22154	0.234762	0.174103	0.19385	0.198375	0.198614	0.198043	0.185069	0.208247	0.200223	0.212548	0.19045	0.219113	0.211071	0.185568	0.139027	0.198564	0.205621
0.200875	0.138869	0.195343	0.181454	0.191702	0.17065	0.211186	0.17607	0.206115	0.18901	0.165743	0.0808423	0.155744	0.0911848	0.191426	0.158416	0.175598	0.155563	0.211605	0.20526	0.218031	0.227468	0.211836	0.215653	0.224942	0.218576	0.196583	0.176561	0.201503	0.202179	0.203547	0.177155	0.212207	0.19836	0.20509	0.193577	0.221716	0.215882	0.194765	0.140926	0.209665	0.214948
0.193052	0.140325	0.200404	0.18644	0.194594	0.178521	0.200329	0.176789	0.192787	0.176938	0.160572	0.0733673	0.16496	0.0987621	0.18884	0.173071	0.172095	0.143125	0.208443	0.201563	0.215137	0.220228	0.213946	0.211249	0.224917	0.216424	0.186107	0.177095	0.194098	0.1866	0.19955	0.184548	0.196746	0.209174	0.207304	0.198818	0.214065	0.222623	0.193273	0.14484	0.196421	0.199573
0.194079	0.131694	0.184484	0.192975	0.203412	0.181359	0.198111	0.176966	0.191523	0.182381	0.159926	0.0776142	0.16254	0.0970573	0.195888	0.17213	0.177663	0.146981	0.211369	0.200663	0.210145	0.221856	0.211168	0.202391	0.229617	0.220612	0.186942	0.191907	0.195743	0.192783	0.192061	0.180656	0.200698	0.208061	0.211449	0.198072	0.223226	0.219734	0.198883	0.141613	0.210715	0.210302
0.202653	0.135331	0.186585	0.188144	0.201767	0.161423	0.188746	0.181312	0.195138	0.195081	0.158383	0.0758417	0.162671	0.0985176	0.187796	0.164788	0.176055	0.139892	0.20819	0.205125	0.213029	0.226517	0.218593	0.225562	0.224283	0.220296	0.188986	0.174361	0.190064	0.199188	0.203364	0.180324	0.202323	0.205445	0.215155	0.188554	0.219034	0.212995	0.195318	0.153388	0.204107	0.211746
0.206747	0.146078	0.19486	0.195035	0.194216	0.176337	0.199448	0.187502	0.189499	0.182663	0.164811	0.0728763	0.157205	0.100215	0.204682	0.16693	0.172548	0.148735	0.222297	0.219387	0.213678	0.233891	0.212284	0.214822	0.22265	0.219825	0.19243	0.177689	0.178995	0.183783	0.192568	0.191523	0.203968	0.195113	0.213564	0.201379	0.225227	0.22753	0.196669	0.151063	0.197437	0.196293
0.189732	0.141791	0.194252	0.183903	0.199178	0.17854	0.203949	0.17855	0.198038	0.189629	0.160886	0.0689938	0.164391	0.0938812	0.196036	0.16149	0.173623	0.138582	0.212947	0.194959	0.213032	0.228659	0.21278	0.216693	0.222859	0.220109	0.187744	0.173152	0.194217	0.197538	0.205652	0.186671	0.195673	0.203108	0.215467	0.200277	0.217428	0.202222	0.200229	0.143476	0.213324	0.212442
0.190111	0.142749	0.189229	0.197736	0.195567	0.165544	0.197613	0.174009	0.188145	0.18053	0.159884	0.0783499	0.164179	0.0924901	0.196301	0.165338	0.17042	0.147304	0.205516	0.210143	0.212018	0.22942	0.211436	0.222049	0.225679	0.219151	0.192644	0.187859	0.196609	0.187979	0.191677	0.187925	0.204166	0.195689	0.194363	0.195813	0.214918	0.211696	0.187315	0.146135	0.202763	0.213969
0.19555	0.148612	0.19648	0.187397	0.190055	0.188325	0.200622	0.182216	0.200481	0.187165	0.158216	0.0776748	0.151129	0.0884924	0.189264	0.165666	0.178576	0.15728	0.209609	0.21034	0.214321	0.231303	0.213473	0.215585	0.214499	0.212839	0.192627	0.177427	0.187905	0.175169	0.207723	0.172949	0.207249	0.198212	0.207908	0.200419	0.220711	0.216723	0.187394	0.144968	0.210879	0.196495
0.186139	0.146837	0.191558	0.202164	0.184265	0.178472	0.210981	0.175233	0.199628	0.183251	0.149632	0.0670568	0.165909	0.0885474	0.200487	0.158858	0.187193	0.142725	0.210906	0.208322	0.213342	0.212676	0.212962	0.209415	0.225711	0.229322	0.198961	0.185305	0.189569	0.189169	0.198629	0.180509	0.206479	0.201166	0.203662	0.198219	0.220944	0.22344	0.189165	0.144257	0.221983	0.197089
0.195639	0.140034	0.187571	0.191614	0.198612	0.178261	0.200536	0.173291	0.198351	0.187576	0.154842	0.0800287	0.164573	0.0902311	0.210611	0.151231	0.17328	0.140088	0.205758	0.196217	0.217615	0.221471	0.207437	0.222594	0.216114	0.220014	0.185801	0.174938	0.187535	0.198617	0.192926	0.192685	0.205593	0.210945	0.209037	0.196049	0.212127	0.212178	0.192922	0.151476	0.200549	0.2109
0.195558	0.144838	0.196983	0.183641	0.198859	0.175961	0.2109	0.182772	0.197334	0.18331	0.161984	0.0661824	0.165442	0.0870907	0.201608	0.164164	0.163911	0.13479	0.219925	0.215831	0.214899	0.221783	0.221482	0.203405	0.236743	0.215538	0.196254	0.180248	0.192651	0.186146	0.197122	0.174012	0.209686	0.206132	0.207126	0.181929	0.22593	0.225188	0.188078	0.141933	0.203975	0.203716
0.193771	0.14508	0.187317	0.186923	0.187473	0.179511	0.202621	0.176075	0.199682	0.178139	0.158582	0.0741758	0.154098	0.0985004	0.198078	0.155402	0.176124	0.150703	0.208562	0.20319	0.211156	0.223865	0.212372	0.220411	0.211618	0.225729	0.205957	0.184188	0.19591	0.191473	0.203374	0.195346	0.202106	0.200329	0.197413	0.19251	0.219734	0.220384	0.197528	0.14952	0.204036	0.202956
0.192566	0.136333	0.191637	0.195519	0.191302	0.168935	0.20877	0.182531	0.18905	0.179501	0.151812	0.0682285	0.160778	0.105873	0.204274	0.158272	0.178182	0.164574	0.222051	0.209653	0.222446	0.217111	0.216197	0.210993	0.225267	0.220891	0.19355	0.180922	0.186871	0.193503	0.197065	0.176253	0.209501	0.199711	0.204458	0.197536	0.225193	0.217668	0.201262	0.145798	0.214703	0.206435
0.186034	0.135727	0.18797	0.193618	0.193821	0.170106	0.207201	0.183797	0.196223	0.190871	0.161241	0.0783848	0.165564	0.0919884	0.207205	0.168042	0.171938	0.150616	0.209577	0.212469	0.212782	0.223659	0.214317	0.216542	0.218601	0.219886	0.19769	0.16991	0.185364	0.187026	0.204168	0.172391	0.204317	0.201089	0.2053	0.189198	0.223981	0.225362	0.196969	0.151803	0.215732	0.2015
0.200753	0.145085	0.202451	0.189687	0.193208	0.17872	0.205371	0.178359	0.204563	0.176765	0.154359	0.075248	0.15876	0.105194	0.199572	0.154979	0.176117	0.150802	0.20363	0.2114	0.212134	0.2286	0.205858	0.216634	0.224579	0.215115	0.191344	0.162977	0.199476	0.184913	0.198956	0.177635	0.198197	0.207641	0.212333	0.183661	0.213701	0.223398	0.200671	0.140562	0.201639	0.198207
0.199926	0.137337	0.199919	0.181995	0.192902	0.177851	0.21166	0.179886	0.205738	0.185	0.16741	0.0752711	0.158527	0.0948991	0.188141	0.170489	0.169135	0.15131	0.207122	0.206966	0.218995	0.221833	0.213596	0.218962	0.223096	0.220745	0.192874	0.175924	0.189216	0.191681	0.195607	0.1705	0.210779	0.201588	0.207761	0.196341	0.215842	0.221321	0.177138	0.134686	0.200389	0.198167
0.191632	0.135086	0.196265	0.184669	0.197026	0.185261	0.211266	0.18299	0.195549	0.192015	0.157583	0.0732243	0.171605	0.0978992	0.19297	0.167296	0.188651	0.143003	0.207739	0.204791	0.203647	0.220992	0.206105	0.211918	0.220489	0.226036	0.19773	0.173873	0.194605	0.191811	0.195041	0.186927	0.206587	0.195422	0.196324	0.193375	0.220547	0.215916	0.190201	0.143144	0.210504	0.197864
0.190401	0.152311	0.185625	0.176536	0.203089	0.169744	0.195199	0.179807	0.192145	0.17685	0.157102	0.0767976	0.165332	0.101525	0.193574	0.15989	0.174093	0.145617	0.208563	0.197225	0.217353	0.229672	0.206813	0.216955	0.210022	0.214282	0.196591	0.177604	0.184228	0.18753	0.196484	0.185584	0.197289	0.203525	0.207961	0.207723	0.21938	0.21817	0.190755	0.144513	0.211018	0.208214
0.199371	0.136287	0.193245	0.183868	0.200116	0.180032	0.203837	0.177983	0.203088	0.182218	0.150213	0.0799622	0.165286	0.100858	0.20357	0.160977	0.172491	0.142848	0.209819	0.20903	0.205301	0.218632	0.219167	0.19483	0.220228	0.225391	0.195984	0.168179	0.199494	0.189645	0.200228	0.190791	0.203495	0.20415	0.207312	0.194753	0.220776	0.217271	0.190151	0.145911	0.203156	0.195274
0.208893	0.135707	0.182644	0.185959	0.190053	0.173951	0.206483	0.176629	0.202643	0.182083	0.157952	0.0812324	0.170156	0.0898337	0.200299	0.165324	0.166676	0.146518	0.212259	0.206378	0.216202	0.222934	0.205623	0.214821	0.217912	0.215681	0.194336	0.179579	0.189745	0.190765	0.193058	0.18174	0.208366	0.205292	0.21159	0.199549	0.210182	0.220457	0.191883	0.145283	0.202514	0.21028
0.191636	0.137022	0.190585	0.191631	0.18407	0.183222	0.206826	0.171372	0.200735	0.192521	0.153224	0.0842105	0.150185	0.102585	0.198538	0.173703	0.18177	0.142566	0.205192	0.201625	0.207982	0.225833	0.226656	0.213894	0.223474	0.230611	0.194975	0.179082	0.191762	0.186619	0.199564	0.171674	0.20714	0.204751	0.19823	0.203117	0.216109	0.224103	0.193537	0.14977	0.211497	0.202576
0.204516	0.135041	0.185924	0.188433	0.198531	0.159813	0.212425	0.181091	0.198861	0.18212	0.153475	0.0741959	0.162903	0.0943562	0.195147	0.168394	0.168124	0.143788	0.205952	0.200805	0.1986	0.228931	0.213961	0.210148	0.217968	0.225434	0.189227	0.172318	0.179696	0.191362	0.201643	0.184837	0.209636	0.209172	0.207303	0.208098	0.219052	0.210256	0.193674	0.138222	0.198584	0.20025
0.201038	0.136628	0.192983	0.18395	0.1961	0.181577	0.202846	0.178858	0.204818	0.185951	0.172499	0.076224	0.153729	0.105554	0.199876	0.165936	0.179566	0.137231	0.205406	0.198108	0.214794	0.224808	0.207656	0.213466	0.225991	0.225857	0.188796	0.186426	0.188055	0.179806	0.196488	0.196206	0.200831	0.191875	0.205277	0.194135	0.223231	0.221508	0.186437	0.143099	0.207274	0.202651
0.197608	0.145973	0.185104	0.193232	0.190941	0.185459	0.198644	0.176952	0.193283	0.175992	0.160183	0.0815552	0.162162	0.0928844	0.192987	0.154557	0.164151	0.145133	0.216534	0.196052	0.198803	0.22953	0.215154	0.21354	0.218506	0.222933	0.186684	0.178052	0.192474	0.19704	0.195903	0.183922	0.205038	0.192932	0.206149	0.197742	0.218774	0.216341	0.192849	0.150694	0.197861	0.202663
0.188899	0.131609	0.188499	0.193027	0.193476	0.173518	0.197835	0.180175	0.188099	0.179449	0.161759	0.0825573	0.166254	0.108181	0.206365	0.161337	0.166776	0.151109	0.21126	0.207305	0.221422	0.226971	0.210322	0.211735	0.217541	0.214829	0.194177	0.195905	0.191427	0.185394	0.194965	0.179259	0.208126	0.198029	0.21567	0.193175	0.221798	0.22784	0.19568	0.135586	0.202015	0.198979
0.193463	0.134735	0.197381	0.184964	0.20286	0.18421	0.206329	0.165764	0.20246	0.187218	0.171849	0.0850642	0.167907	0.103723	0.197795	0.163042	0.171558	0.149659	0.209522	0.214257	0.205036	0.228109	0.211834	0.211575	0.210961	0.229355	0.192772	0.176908	0.197647	0.18749	0.195913	0.179243	0.192808	0.198842	0.212504	0.196685	0.220562	0.215605	0.182444	0.145299	0.192438	0.20763
0.201368	0.137314	0.18759	0.18223	0.199746	0.179564	0.202621	0.17632	0.201793	0.185821	0.165974	0.074253	0.17244	0.0904433	0.198865	0.172866	0.174088	0.151896	0.211127	0.202256	0.220145	0.228735	0.220745	0.215706	0.219199	0.228834	0.187675	0.178331	0.192908	0.200614	0.196533	0.180145	0.208808	0.211412	0.214934	0.195564	0.214372	0.215002	0.190943	0.147834	0.204864	0.204292
0.203189	0.139964	0.193688	0.183352	0.184686	0.172839	0.20553	0.189116	0.197971	0.18674	0.15725	0.0743979	0.154919	0.112995	0.199884	0.157229	0.17378	0.141059	0.210161	0.204218	0.21153	0.218658	0.205626	0.208544	0.216778	0.226806	0.191201	0.183189	0.195954	0.184255	0.209218	0.176658	0.19715	0.202728	0.206719	0.206666	0.219485	0.213987	0.19061	0.151626	0.212367	0.204505
0.204739	0.132337	0.190264	0.196208	0.201715	0.185123	0.206569	0.167065	0.201879	0.183577	0.174238	0.0734727	0.156144	0.0972931	0.189889	0.167213	0.176182	0.139094	0.217592	0.196655	0.211691	0.230647	0.205347	0.223476	0.218824	0.229266	0.194818	0.179814	0.192276	0.19163	0.20359	0.176862	0.210096	0.204584	0.213659	0.202396	0.214154	0.214224	0.189589	0.135116	0.215494	0.200489
0.206123	0.136599	0.193322	0.194285	0.194435	0.175284	0.196783	0.181097	0.200509	0.1872	0.1618	0.0699053	0.169434	0.0937389	0.19477	0.158065	0.182489	0.152989	0.216324	0.210052	0.211054	0.207942	0.219291	0.216889	0.226635	0.223216	0.182018	0.180549	0.196373	0.184667	0.199799	0.183678	0.200717	0.209017	0.20064	0.189328	0.208453	0.224611	0.190525	0.155729	0.205144	0.195977
0.199051	0.136475	0.193215	0.193617	0.197359	0.178904	0.200311	0.179708	0.190937	0.187442	0.163284	0.0735992	0.170322	0.102255	0.198601	0.170458	0.173754	0.14422	0.209047	0.197962	0.209646	0.219442	0.211104	0.215507	0.206438	0.223716	0.19504	0.177021	0.201793	0.183078	0.202499	0.171532	0.21063	0.196148	0.213431	0.196592	0.223738	0.212341	0.180099	0.146121	0.197222	0.210623
0.192083	0.150198	0.197866	0.183763	0.196221	0.180432	0.197397	0.169752	0.19549	0.183825	0.151614	0.0825573	0.154811	0.083709	0.200721	0.170178	0.170467	0.150715	0.200408	0.214383	0.217181	0.234184	0.210309	0.215835	0.21629	0.225683	0.199998	0.174562	0.196071	0.184232	0.193414	0.18399	0.195158	0.208013	0.200164	0.195099	0.219307	0.220353	0.193112	0.141903	0.206614	0.192437
0.193594	0.143612	0.185219	0.195285	0.18389	0.174875	0.202225	0.176038	0.189374	0.18729	0.162524	0.0749643	0.157291	0.106245	0.193293	0.164853	0.175026	0.153183	0.207193	0.205417	0.21825	0.22938	0.213957	0.201533	0.219925	0.231375	0.195407	0.169475	0.185021	0.184414	0.200106	0.178715	0.197361	0.210667	0.21258	0.200029	0.219758	0.215678	0.190858	0.142967	0.208201	0.195655
0.195751	0.141823	0.183651	0.201909	0.186631	0.167476	0.210748	0.185018	0.202362	0.181475	0.159599	0.0825832	0.146273	0.100779	0.193777	0.163094	0.176866	0.155252	0.209652	0.209552	0.225542	0.221265	0.211583	0.206855	0.226869	0.226934	0.187618	0.180611	0.189128	0.195311	0.195656	0.186771	0.202352	0.193579	0.211446	0.182906	0.223957	0.209707	0.182528	0.146783	0.201023	0.194714
0.191479	0.142756	0.188331	0.192658	0.194042	0.169313	0.202581	0.186409	0.19941	0.180322	0.164154	0.0759316	0.158747	0.0985231	0.208581	0.153722	0.165061	0.144273	0.222456	0.211827	0.217457	0.232513	0.201242	0.210983	0.212329	0.21276	0.189644	0.179931	0.192759	0.188219	0.206737	0.183047	0.201764	0.200699	0.205734	0.189633	0.213169	0.207118	0.18736	0.141242	0.194214	0.208611
0.202276	0.139021	0.196943	0.189211	0.198711	0.177308	0.203827	0.18464	0.193634	0.191879	0.167714	0.075321	0.154968	0.0898546	0.190109	0.168148	0.17898	0.154876	0.19872	0.204864	0.211037	0.226777	0.208096	0.217061	0.220053	0.232065	0.19996	0.172589	0.194226	0.181649	0.192927	0.181511	0.213606	0.199837	0.213582	0.198928	0.218153	0.218445	0.196331	0.154956	0.203199	0.200024
0.190495	0.132491	0.192451	0.185764	0.189011	0.18646	0.213954	0.189696	0.195998	0.184455	0.15789	0.0674466	0.156202	0.10371	0.183607	0.159881	0.161661	0.15689	0.200176	0.206931	0.210697	0.230851	0.218198	0.212697	0.21316	0.22502	0.190822	0.171465	0.194524	0.189792	0.193307	0.18856	0.201231	0.205857	0.206393	0.193579	0.21205	0.223045	0.19429	0.143865	0.207525	0.184496
0.200731	0.133009	0.195977	0.180483	0.192927	0.18027	0.201557	0.172504	0.196139	0.185721	0.165666	0.083689	0.161512	0.0933702	0.209397	0.166176	0.163203	0.157743	0.209914	0.210441	0.213105	0.219538	0.209004	0.218344	0.212733	0.224174	0.189216	0.170611	0.188542	0.191604	0.184638	0.171391	0.19713	0.207817	0.207274	0.19449	0.212935	0.216841	0.195854	0.151511	0.203493	0.198601
0.205401	0.139697	0.186535	0.191084	0.193776	0.168159	0.202859	0.188293	0.198318	0.180725	0.166545	0.0797485	0.157963	0.102667	0.19428	0.167803	0.176768	0.148551	0.209064	0.195603	0.203905	0.22553	0.205155	0.212906	0.227804	0.228383	0.187667	0.179594	0.193442	0.192863	0.201648	0.177333	0.199433	0.197864	0.205561	0.191832	0.213699	0.222953	0.190003	0.139831	0.2006	0.205219
0.196679	0.152397	0.195078	0.181676	0.197115	0.178481	0.210058	0.180819	0.198709	0.179828	0.161316	0.0802658	0.162892	0.0973401	0.204434	0.171157	0.179627	0.159166	0.208813	0.203624	0.21404	0.22463	0.221403	0.218216	0.233819	0.223578	0.191592	0.164552	0.196732	0.182593	0.19767	0.181951	0.202759	0.20074	0.214837	0.19984	0.221849	0.225747	0.193101	0.124253	0.201859	0.200975
0.198324	0.14473	0.192349	0.18304	0.198036	0.1781	0.205928	0.177772	0.194771	0.190766	0.157723	0.0852192	0.167285	0.098787	0.195843	0.168669	0.183321	0.13302	0.215694	0.21292	0.206829	0.226559	0.221742	0.216428	0.21637	0.215676	0.187053	0.182369	0.195239	0.186193	0.19292	0.180435	0.21046	0.203519	0.205526	0.197547	0.218173	0.221878	0.192621	0.139208	0.199471	0.188484
0.197396	0.141216	0.188568	0.195212	0.192	0.17343	0.212102	0.177997	0.201878	0.181529	0.150675	0.0724376	0.176563	0.0959985	0.193865	0.164703	0.175817	0.149702	0.213159	0.200618	0.215998	0.2254	0.216496	0.210821	0.221231	0.2195	0.197485	0.177148	0.193411	0.188997	0.20353	0.181559	0.214677	0.210065	0.203454	0.212469	0.209302	0.221749	0.190412	0.153511	0.208906	0.201146
0.198181	0.129722	0.193288	0.185461	0.184113	0.175255	0.204722	0.176315	0.200497	0.177421	0.162034	0.0744496	0.155588	0.092852	0.198	0.158732	0.17259	0.134047	0.216769	0.203989	0.226178	0.210299	0.207197	0.202336	0.211683	0.221874	0.190014	0.180612	0.186758	0.198235	0.20129	0.176731	0.204857	0.202756	0.204996	0.190796	0.229926	0.227051	0.198186	0.133301	0.197217	0.214572
0.1878	0.134231	0.201168	0.187675	0.193422	0.179376	0.203858	0.17998	0.189707	0.18777	0.161974	0.0703704	0.161446	0.0789948	0.197801	0.161458	0.166964	0.154184	0.207903	0.204496	0.205269	0.227369	0.210564	0.220183	0.230503	0.227063	0.195084	0.18096	0.196862	0.188789	0.203071	0.185329	0.199733	0.205041	0.200702	0.197933	0.225913	0.219455	0.19689	0.151052	0.196026	0.201949
0.191789	0.13896	0.180495	0.190142	0.18977	0.177512	0.209516	0.190587	0.187541	0.188052	0.156525	0.0824681	0.163786	0.0929953	0.192519	0.16679	0.163769	0.14664	0.204193	0.210008	0.21303	0.236173	0.209545	0.206588	0.224134	0.220065	0.196385	0.168357	0.192562	0.197501	0.202191	0.175759	0.206623	0.199786	0.201207	0.202995	0.22478	0.224829	0.190357	0.136773	0.201432	0.207158
0.196299	0.134781	0.195035	0.176643	0.198276	0.175653	0.205304	0.182448	0.193684	0.183306	0.167054	0.0717179	0.157216	0.0923745	0.206488	0.15812	0.17486	0.16642	0.20623	0.21241	0.212009	0.231795	0.20219	0.204162	0.214245	0.228757	0.197264	0.177664	0.191776	0.182804	0.195008	0.180107	0.196458	0.197025	0.208478	0.205355	0.224245	0.214092	0.199901	0.135482	0.195804	0.197243
0.204039	0.146399	0.191808	0.187945	0.189516	0.174526	0.198558	0.180843	0.200491	0.181041	0.159776	0.0787073	0.152785	0.0984385	0.197535	0.169639	0.176949	0.151065	0.209075	0.204382	0.20758	0.226685	0.209577	0.21214	0.218116	0.230377	0.186359	0.176331	0.202049	0.188115	0.199394	0.189169	0.20701	0.197585	0.210115	0.201114	0.218343	0.21326	0.197625	0.14651	0.202278	0.206558
0.199541	0.150732	0.193559	0.1971	0.191124	0.171653	0.193328	0.183192	0.193729	0.181579	0.166389	0.0771085	0.167692	0.0961506	0.189022	0.156127	0.174465	0.145396	0.21086	0.215506	0.209714	0.222026	0.213324	0.216732	0.209076	0.218734	0.20295	0.182124	0.197917	0.183881	0.191905	0.183715	0.211331	0.200656	0.208216	0.200639	0.226209	0.213181	0.18641	0.143451	0.199705	0.198629
0.208881	0.146928	0.191367	0.184574	0.198276	0.173078	0.215093	0.185846	0.199864	0.173319	0.16507	0.0661275	0.167387	0.0952801	0.197886	0.169282	0.168696	0.142562	0.215707	0.212491	0.217151	0.234894	0.217428	0.211639	0.225413	0.227369	0.191783	0.176678	0.191911	0.204911	0.196059	0.18701	0.202018	0.205356	0.203672	0.198759	0.225659	0.222542	0.185408	0.143329	0.206248	0.192483
0.192747	0.145269	0.195407	0.181681	0.201107	0.172748	0.202463	0.183515	0.211445	0.183841	0.162973	0.0832331	0.166046	0.0975592	0.199825	0.169242	0.168239	0.149345	0.206263	0.217274	0.215177	0.222793	0.208492	0.214047	0.224959	0.220703	0.199608	0.177946	0.189801	0.197888	0.200106	0.182513	0.216353	0.211696	0.211237	0.202019	0.215639	0.225636	0.189452	0.146222	0.208202	0.206866
0.194948	0.134316	0.186588	0.1931	0.19498	0.176139	0.200404	0.187637	0.200694	0.191528	0.157859	0.0852601	0.160253	0.0884147	0.199923	0.1539	0.18162	0.144746	0.212637	0.196202	0.209829	0.226568	0.211427	0.216133	0.218326	0.225781	0.198076	0.174444	0.182706	0.186122	0.201654	0.187708	0.205599	0.18868	0.204115	0.192102	0.21461	0.219408	0.196636	0.141006	0.220007	0.207781
0.197975	0.141631	0.193589	0.182178	0.193281	0.165693	0.208014	0.177129	0.198686	0.185564	0.154481	0.0780928	0.160794	0.0997626	0.188275	0.166203	0.172613	0.156709	0.202717	0.205629	0.207254	0.22783	0.209024	0.216892	0.223961	0.217471	0.198697	0.182461	0.184397	0.185292	0.202053	0.180344	0.213912	0.21045	0.206637	0.204109	0.218382	0.231087	0.203215	0.141853	0.20185	0.207504
0.186419	0.145326	0.19389	0.1883	0.196667	0.185499	0.197011	0.178707	0.197311	0.189852	0.174417	0.0862365	0.163441	0.0984359	0.196161	0.167805	0.172017	0.153662	0.211395	0.210604	0.206417	0.223267	0.216734	0.205221	0.219378	0.215209	0.189531	0.184912	0.189467	0.186404	0.199924	0.176195	0.205885	0.200242	0.205457	0.195309	0.223694	0.217179	0.195262	0.139884	0.207164	0.210774
0.201339	0.134836	0.189052	0.200822	0.190341	0.169288	0.204514	0.183996	0.196019	0.187555	0.164299	0.0760855	0.166574	0.089307	0.193671	0.1641	0.170545	0.156912	0.208185	0.199674	0.201315	0.215352	0.220646	0.215071	0.215767	0.209821	0.194835	0.183811	0.187978	0.18843	0.201151	0.170236	0.196997	0.205568	0.209975	0.20073	0.218223	0.221972	0.186839	0.144099	0.200482	0.205208
0.196768	0.140749	0.189352	0.188931	0.198955	0.180045	0.216294	0.188053	0.198086	0.179016	0.162252	0.0705308	0.159995	0.0943915	0.196622	0.167863	0.177483	0.145046	0.215639	0.199495	0.218799	0.22158	0.218725	0.221129	0.215012	0.229202	0.189926	0.184334	0.190055	0.188861	0.207393	0.179319	0.200455	0.190368	0.217511	0.192916	0.22091	0.214252	0.190433	0.148298	0.198312	0.205399
0.193511	0.143591	0.200503	0.181187	0.19572	0.175954	0.205061	0.187181	0.200843	0.184362	0.150277	0.0780545	0.171612	0.100338	0.18958	0.157089	0.166734	0.149327	0.20988	0.209258	0.208739	0.224229	0.216183	0.219328	0.224082	0.228365	0.184414	0.177228	0.197635	0.191994	0.19479	0.173381	0.213052	0.200299	0.208498	0.193887	0.212332	0.224747	0.184862	0.153197	0.206801	0.191225
0.200852	0.143788	0.197676	0.181062	0.191022	0.165935	0.208342	0.18915	0.201933	0.17589	0.173227	0.0749862	0.161516	0.0938283	0.198089	0.165471	0.165028	0.150787	0.218743	0.192075	0.213252	0.228973	0.216147	0.207008	0.215983	0.235006	0.195567	0.179255	0.198393	0.202068	0.19597	0.179862	0.201181	0.206565	0.205556	0.196233	0.216227	0.22321	0.182235	0.143221	0.212557	0.200768
0.200651	0.147514	0.19122	0.193623	0.191731	0.169225	0.195977	0.171668	0.205055	0.182166	0.166848	0.0720139	0.163573	0.0880766	0.204627	0.152492	0.172396	0.132883	0.213413	0.211031	0.209928	0.221752	0.216411	0.21911	0.223346	0.217121	0.194462	0.179797	0.202601	0.185272	0.212229	0.179743	0.197708	0.211365	0.205348	0.201524	0.213799	0.208034	0.190099	0.140782	0.209032	0.211739
0.184037	0.143577	0.19375	0.192562	0.190049	0.182465	0.196881	0.176195	0.202792	0.18018	0.165992	0.0655482	0.155972	0.0936034	0.190449	0.169043	0.182051	0.138849	0.198997	0.208345	0.207994	0.230458	0.21192	0.220828	0.215715	0.229662	0.2017	0.172941	0.187853	0.185963	0.192914	0.165965	0.199046	0.191917	0.20358	0.196261	0.216816	0.207913	0.190007	0.144465	0.203185	0.212668
0.191608	0.137112	0.193714	0.191944	0.194283	0.17732	0.204946	0.186078	0.212085	0.183011	0.174385	0.0781957	0.169044	0.092412	0.199924	0.161681	0.172278	0.13952	0.214255	0.212026	0.213581	0.222916	0.213371	0.208093	0.221339	0.222943	0.198775	0.181636	0.193445	0.184768	0.185483	0.171208	0.200711	0.198855	0.214629	0.204841	0.211642	0.220167	0.1906	0.148994	0.218764	0.212174
0.195402	0.136222	0.192014	0.182205	0.189513	0.172187	0.203236	0.171232	0.194009	0.167278	0.161654	0.0778358	0.147731	0.0992277	0.192793	0.170065	0.172969	0.138655	0.201933	0.205332	0.212002	0.220784	0.218278	0.207971	0.216834	0.222729	0.184861	0.189644	0.187707	0.187802	0.195231	0.193387	0.204849	0.207893	0.215047	0.206177	0.210798	0.217478	0.191527	0.142331	0.198359	0.197203
0.195651	0.148773	0.183237	0.191336	0.177917	0.177166	0.202229	0.16813	0.197664	0.188144	0.15894	0.0713113	0.155322	0.093156	0.202119	0.167563	0.175325	0.154915	0.206129	0.205766	0.213051	0.215171	0.21518	0.213296	0.209395	0.227947	0.180921	0.180966	0.188205	0.189668	0.203127	0.169697	0.206585	0.195428	0.206701	0.192559	0.217047	0.215261	0.195308	0.140151	0.194911	0.20078
0.192474	0.136111	0.186838	0.190262	0.194197	0.163349	0.206138	0.185917	0.190139	0.182465	0.166465	0.0726843	0.157155	0.0982072	0.190049	0.159506	0.174788	0.159056	0.211011	0.203335	0.215619	0.228811	0.203263	0.209339	0.223925	0.233416	0.19723	0.177719	0.193332	0.189636	0.180243	0.182319	0.20179	0.191046	0.205519	0.197031	0.220164	0.227866	0.188184	0.139419	0.199764	0.201911
0.200448	0.143096	0.197777	0.199323	0.192529	0.174812	0.196043	0.179766	0.200154	0.190544	0.159289	0.0859467	0.156191	0.0953706	0.19082	0.162298	0.170826	0.16244	0.212325	0.203233	0.216056	0.228348	0.233987	0.207738	0.213671	0.223525	0.194224	0.187109	0.189117	0.198492	0.193197	0.18679	0.211634	0.199221	0.211645	0.195659	0.222291	0.227332	0.191741	0.141663	0.210412	0.194101
0.204058	0.131064	0.197114	0.185848	0.196974	0.167989	0.207922	0.180192	0.194603	0.190301	0.172617	0.0732865	0.170252	0.0997226	0.200352	0.172118	0.176926	0.140555	0.210897	0.212338	0.210731	0.217654	0.213875	0.202767	0.229216	0.226816	0.196832	0.179213	0.188767	0.173594	0.201422	0.177559	0.207234	0.191353	0.210781	0.195398	0.216836	0.213973	0.197023	0.144766	0.199043	0.213532
0.192089	0.144932	0.196823	0.189833	0.194381	0.168329	0.208247	0.181496	0.205512	0.183711	0.161589	0.0780604	0.157958	0.100632	0.198283	0.154907	0.174313	0.148199	0.21512	0.205498	0.212245	0.23018	0.209543	0.21098	0.223263	0.232751	0.195068	0.186353	0.191578	0.189789	0.199424	0.180942	0.204454	0.203412	0.198379	0.193791	0.216494	0.215862	0.187067	0.137286	0.200682	0.19385
0.189104	0.152016	0.189576	0.194112	0.189584	0.171496	0.209798	0.179473	0.192896	0.177744	0.161542	0.0770014	0.160728	0.102652	0.200997	0.164297	0.172963	0.152659	0.212236	0.208655	0.221977	0.222086	0.21742	0.213671	0.208086	0.219604	0.187769	0.171079	0.188916	0.180513	0.201112	0.176171	0.207226	0.214937	0.197765	0.203337	0.224686	0.218727	0.180099	0.126266	0.210733	0.209153
0.190808	0.137553	0.201941	0.182272	0.193076	0.184506	0.207697	0.178469	0.196313	0.184438	0.150412	0.0828864	0.165601	0.097395	0.192474	0.159164	0.167942	0.15169	0.201839	0.205886	0.212482	0.218512	0.218572	0.229647	0.221811	0.235549	0.205274	0.182127	0.188605	0.186325	0.199002	0.186643	0.208942	0.19492	0.197241	0.202958	0.216362	0.221394	0.195381	0.131475	0.196592	0.201815
0.199584	0.143263	0.191259	0.183869	0.203044	0.171884	0.209129	0.181522	0.215052	0.183524	0.165521	0.079734	0.16082	0.0996975	0.193081	0.163248	0.178032	0.149412	0.211655	0.203867	0.226491	0.222592	0.206092	0.216384	0.223639	0.228223	0.194581	0.169106	0.193751	0.192821	0.197075	0.185714	0.209067	0.200943	0.212212	0.204465	0.221964	0.224499	0.198508	0.136843	0.206756	0.204778
0.18841	0.135369	0.199678	0.18316	0.18895	0.171195	0.200969	0.183867	0.19096	0.181778	0.167726	0.074005	0.167803	0.0917602	0.194806	0.168889	0.166921	0.15532	0.198965	0.213086	0.21887	0.227044	0.216836	0.210174	0.220406	0.223616	0.195299	0.175704	0.205912	0.191343	0.193082	0.184251	0.216539	0.200013	0.21942	0.193832	0.218803	0.226811	0.181155	0.13535	0.201796	0.186275
0.199015	0.14178	0.193164	0.183713	0.201556	0.164765	0.215353	0.176455	0.198943	0.173742	0.167662	0.0748344	0.165942	0.100607	0.19961	0.159202	0.168127	0.150352	0.21344	0.219625	0.215719	0.218608	0.220377	0.207629	0.222546	0.226661	0.190553	0.178983	0.18407	0.189399	0.188683	0.178196	0.203103	0.215904	0.211172	0.204129	0.221208	0.213276	0.192402	0.14602	0.213849	0.203405
0.186173	0.135535	0.193582	0.181832	0.193115	0.166787	0.210381	0.17525	0.193758	0.175223	0.172075	0.0694258	0.173188	0.100477	0.191899	0.174362	0.171302	0.143931	0.213213	0.200151	0.209391	0.222762	0.213152	0.205748	0.212106	0.222744	0.185968	0.177086	0.187643	0.183742	0.201718	0.187642	0.206661	0.211907	0.213032	0.199528	0.21865	0.215775	0.191987	0.132825	0.212772	0.20506
0.20054	0.139584	0.205705	0.19193	0.190316	0.177903	0.203794	0.176476	0.20464	0.192026	0.156804	0.0719732	0.170021	0.0968313	0.190976	0.155934	0.182845	0.137717	0.204052	0.206291	0.205023	0.224372	0.220528	0.22171	0.226667	0.229098	0.189513	0.174927	0.189799	0.188853	0.205978	0.170814	0.199556	0.207135	0.213371	0.19549	0.212899	0.220504	0.196677	0.144002	0.209968	0.20089
0.194274	0.139491	0.199895	0.181595	0.197617	0.168589	0.208387	0.186882	0.203278	0.183498	0.166093	0.0797224	0.157609	0.0948795	0.201519	0.164259	0.174051	0.140976	0.210951	0.20439	0.208103	0.230213	0.206704	0.208486	0.217265	0.222675	0.192385	0.180176	0.193724	0.183296	0.204141	0.177026	0.209659	0.1998	0.202266	0.192418	0.221774	0.213164	0.194529	0.150804	0.204326	0.209266
0.197348	0.143052	0.194292	0.182574	0.194473	0.16944	0.202411	0.179955	0.198926	0.179766	0.155971	0.0763953	0.158662	0.0976618	0.188356	0.166183	0.162743	0.155184	0.210593	0.1999	0.212961	0.22255	0.208261	0.206819	0.227855	0.219738	0.196313	0.185893	0.1913	0.187404	0.20392	0.173285	0.206025	0.20387	0.211158	0.200398	0.226123	0.205537	0.198184	0.148921	0.213049	0.194123
0.203695	0.144336	0.197496	0.179611	0.206156	0.175235	0.198322	0.174386	0.188773	0.177721	0.159831	0.0696996	0.165017	0.102416	0.196735	0.171316	0.181737	0.148096	0.215353	0.203243	0.215523	0.220504	0.218342	0.221229	0.212659	0.226383	0.184617	0.17724	0.192648	0.187339	0.207955	0.185686	0.193839	0.197659	0.203785	0.19165	0.20835	0.22522	0.187233	0.149013	0.197357	0.202896
0.178035	0.138693	0.176718	0.189891	0.191452	0.16509	0.205462	0.173502	0.207003	0.184688	0.158607	0.0709512	0.164524	0.095693	0.196814	0.167736	0.177391	0.136737	0.213534	0.217049	0.208783	0.216669	0.214817	0.201679	0.217122	0.207746	0.18433	0.182146	0.185327	0.190907	0.200331	0.186414	0.211396	0.210303	0.207732	0.192822	0.225556	0.214043	0.189217	0.152241	0.205032	0.204467
0.206613	0.139439	0.190094	0.189504	0.207048	0.18355	0.203568	0.180685	0.205227	0.177916	0.164683	0.0732887	0.15485	0.0931876	0.203753	0.16727	0.173493	0.150586	0.196055	0.212995	0.207764	0.232231	0.208007	0.211079	0.225643	0.20887	0.190647	0.175787	0.1892	0.194651	0.198701	0.176058	0.204958	0.188382	0.219142	0.185756	0.211853	0.217703	0.187295	0.151398	0.183108	0.20382
0.201829	0.156159	0.194748	0.178786	0.179455	0.181132	0.201523	0.182605	0.198729	0.189776	0.160021	0.0852118	0.161112	0.092631	0.196773	0.161647	0.173741	0.138691	0.204748	0.212531	0.219197	0.227076	0.212519	0.207696	0.225045	0.214502	0.189745	0.193841	0.187325	0.19274	0.198777	0.176159	0.204907	0.202593	0.202722	0.19459	0.217091	0.218078	0.186539	0.142551	0.200428	0.207589
0.18978	0.142357	0.190484	0.18033	0.190772	0.174714	0.205509	0.186318	0.196251	0.188882	0.160332	0.0723492	0.15641	0.0921455	0.186048	0.16029	0.175876	0.15088	0.214696	0.207644	0.203684	0.21971	0.213782	0.210246	0.210564	0.240758	0.196577	0.180716	0.192922	0.191577	0.199653	0.182661	0.201353	0.204105	0.196137	0.202788	0.212679	0.223403	0.192303	0.148091	0.210788	0.200423
0.196241	0.141903	0.198788	0.183586	0.191631	0.174403	0.206904	0.183324	0.195031	0.1845	0.147342	0.07202	0.159835	0.0914787	0.201551	0.165418	0.163647	0.154101	0.201389	0.214643	0.210275	0.23228	0.204091	0.214976	0.21541	0.214631	0.206554	0.178685	0.206613	0.182046	0.205175	0.175138	0.206095	0.199776	0.202266	0.194405	0.227082	0.220572	0.190407	0.150056	0.203141	0.195774
0.196939	0.13943	0.198475	0.184684	0.195474	0.176825	0.212313	0.17875	0.198841	0.191492	0.159274	0.0720626	0.182035	0.101232	0.189833	0.166564	0.17216	0.146203	0.215674	0.208551	0.205502	0.22299	0.213394	0.226624	0.227768	0.217993	0.186818	0.175356	0.187289	0.188958	0.193954	0.166001	0.205116	0.205555	0.204962	0.189172	0.218364	0.21214	0.189523	0.153445	0.206247	0.190229
0.19703	0.142151	0.205388	0.180684	0.19427	0.169374	0.213365	0.171518	0.204049	0.175672	0.154834	0.0829737	0.164906	0.0958396	0.202343	0.166855	0.16901	0.148694	0.216677	0.216065	0.213495	0.214216	0.218557	0.20706	0.225956	0.225948	0.194708	0.171103	0.185968	0.18737	0.196552	0.176891	0.197756	0.19639	0.213807	0.200616	0.222803	0.217546	0.193622	0.140524	0.201099	0.201436
0.191218	0.141228	0.191941	0.193886	0.190293	0.176145	0.199702	0.192961	0.195154	0.189171	0.165752	0.07648	0.157745	0.0880526	0.190334	0.17087	0.18177	0.149478	0.218812	0.202519	0.223553	0.224524	0.211044	0.221813	0.220599	0.221867	0.194001	0.171956	0.189237	0.195461	0.197862	0.189877	0.206883	0.190944	0.207482	0.200042	0.220666	0.216329	0.189401	0.145442	0.207635	0.205238
0.207918	0.130223	0.181832	0.18756	0.191216	0.172161	0.196003	0.185596	0.193241	0.188299	0.165791	0.070126	0.154816	0.098623	0.207332	0.164222	0.174599	0.160971	0.206825	0.206039	0.211178	0.226917	0.201363	0.219895	0.213914	0.232906	0.189328	0.17851	0.191237	0.176357	0.205095	0.18045	0.201319	0.201202	0.207799	0.208408	0.222956	0.220043	0.19842	0.143733	0.206845	0.205698
0.197619	0.134031	0.190876	0.179679	0.189106	0.185371	0.198714	0.180641	0.194757	0.18102	0.156269	0.0656393	0.175393	0.103351	0.200336	0.159678	0.167736	0.147967	0.212322	0.204928	0.211005	0.222892	0.213234	0.222322	0.232883	0.223732	0.191881	0.178059	0.197378	0.185034	0.197253	0.174139	0.213771	0.195922	0.202769	0.194519	0.227097	0.210075	0.189061	0.139718	0.20819	0.205127
0.191039	0.146513	0.197655	0.187226	0.19661	0.182504	0.20423	0.178419	0.204846	0.183641	0.165217	0.079611	0.164121	0.108485	0.195883	0.151912	0.177379	0.144932	0.208518	0.200305	0.215098	0.221847	0.206401	0.215634	0.223532	0.222011	0.201188	0.179722	0.200072	0.193727	0.192459	0.190695	0.201745	0.201416	0.201882	0.202328	0.203663	0.221426	0.19347	0.141985	0.190531	0.205316
0.194113	0.130417	0.201399	0.188809	0.20309	0.175405	0.206631	0.171564	0.196351	0.177786	0.157023	0.0806844	0.156671	0.0893386	0.199791	0.159324	0.171204	0.144883	0.215337	0.214788	0.212004	0.226308	0.203702	0.229609	0.227578	0.224356	0.194917	0.17637	0.192549	0.186914	0.198942	0.187467	0.206808	0.195863	0.209215	0.195493	0.220388	0.221852	0.188315	0.134945	0.202383	0.194932
0.198323	0.135493	0.182159	0.186625	0.203734	0.187963	0.206143	0.176351	0.193103	0.186209	0.154088	0.0722632	0.157373	0.0946603	0.188803	0.163509	0.157745	0.15183	0.210203	0.210746	0.220506	0.2172	0.21582	0.207941	0.218951	0.231537	0.20505	0.181438	0.192062	0.1922	0.208602	0.187995	0.195982	0.201599	0.208571	0.186942	0.214638	0.216221	0.187766	0.148035	0.204619	0.2002
0.189729	0.140584	0.195439	0.190096	0.188297	0.176449	0.20184	0.17566	0.200803	0.177974	0.156115	0.0844522	0.155352	0.096737	0.201504	0.170287	0.173515	0.154503	0.210032	0.203546	0.219822	0.22481	0.223907	0.211254	0.226692	0.213869	0.203345	0.172142	0.188189	0.187063	0.194496	0.176688	0.208762	0.214801	0.209972	0.196602	0.223347	0.223922	0.194953	0.142946	0.207306	0.189829
0.188448	0.130059	0.200073	0.186663	0.200798	0.175392	0.205416	0.190324	0.20069	0.182815	0.156718	0.0736098	0.160696	0.102541	0.1941	0.147424	0.174128	0.145586	0.212703	0.206053	0.210265	0.210837	0.210784	0.205082	0.220862	0.230796	0.196218	0.187808	0.197871	0.181712	0.190189	0.183767	0.203871	0.202923	0.205909	0.191921	0.211621	0.218224	0.187749	0.159991	0.198961	0.209731
0.18546	0.147811	0.192969	0.183491	0.192682	0.171051	0.198385	0.169209	0.195863	0.186039	0.166549	0.0790253	0.155952	0.100003	0.202294	0.161086	0.178087	0.149426	0.210624	0.212507	0.214766	0.22309	0.218788	0.214251	0.220428	0.218445	0.187468	0.181335	0.199396	0.187591	0.200012	0.1735	0.21637	0.200208	0.211458	0.201789	0.216759	0.216576	0.192532	0.143794	0.198314	0.19808
0.195793	0.129443	0.194767	0.18198	0.188198	0.184355	0.206191	0.174422	0.206008	0.17826	0.154068	0.0750421	0.158433	0.0926329	0.197057	0.16564	0.177565	0.144744	0.206446	0.212362	0.211978	0.227263	0.208223	0.21302	0.219124	0.219555	0.19661	0.176707	0.190782	0.190258	0.189172	0.178613	0.199089	0.201924	0.208697	0.188533	0.225865	0.21453	0.193482	0.146989	0.2046	0.203714
0.206416	0.134059	0.197145	0.177157	0.186283	0.171484	0.200801	0.169137	0.198481	0.182806	0.153681	0.0680119	0.170061	0.0983636	0.196325	0.16428	0.175455	0.156059	0.210952	0.205852	0.21237	0.218063	0.207096	0.223116	0.226412	0.22476	0.180331	0.179299	0.189649	0.191401	0.200032	0.178559	0.197521	0.207654	0.197297	0.198045	0.227706	0.22236	0.195133	0.145789	0.201279	0.196481
0.196646	0.148068	0.197638	0.189542	0.192684	0.177499	0.192926	0.173997	0.207372	0.185417	0.162109	0.0744395	0.167096	0.0989285	0.197727	0.161568	0.181666	0.150871	0.210347	0.209375	0.211597	0.219731	0.20406	0.224428	0.219541	0.236204	0.197482	0.177672	0.19291	0.183302	0.206886	0.178658	0.198981	0.202023	0.204057	0.196945	0.211981	0.206477	0.198927	0.149202	0.215009	0.21107
0.199801	0.14465	0.200328	0.196565	0.197501	0.179107	0.210965	0.176517	0.198382	0.1766	0.158683	0.0795662	0.166121	0.0986505	0.199558	0.169794	0.177309	0.148469	0.210621	0.202879	0.211969	0.220123	0.209617	0.213591	0.225408	0.222219	0.179836	0.180691	0.201372	0.185762	0.202941	0.18687	0.209093	0.201039	0.210477	0.201466	0.225777	0.218376	0.197513	0.147981	0.217427	0.203428
0.191522	0.139257	0.185717	0.193706	0.195414	0.180212	0.205032	0.17861	0.206108	0.185961	0.155985	0.0789442	0.165813	0.0997178	0.196366	0.165573	0.169938	0.135792	0.211633	0.213637	0.2129	0.228352	0.203544	0.214188	0.212548	0.228328	0.198185	0.177026	0.198181	0.182411	0.193392	0.18634	0.200092	0.207655	0.208146	0.203762	0.217437	0.21434	0.202311	0.145667	0.192451	0.19129
0.196599	0.146655	0.193449	0.184969	0.19464	0.173916	0.211239	0.17988	0.184189	0.172379	0.161978	0.0846019	0.171596	0.0968998	0.195621	0.166983	0.16949	0.145725	0.219057	0.198832	0.216534	0.214261	0.199909	0.207592	0.235574	0.220037	0.204665	0.176037	0.186729	0.194636	0.192926	0.174622	0.199351	0.198319	0.211318	0.193997	0.213373	0.214917	0.191015	0.150318	0.188687	0.191133
0.183901	0.154613	0.189176	0.196477	0.190133	0.170057	0.198368	0.182332	0.208534	0.176241	0.16875	0.0782806	0.157814	0.0985239	0.195478	0.160522	0.169919	0.142552	0.190618	0.207731	0.219838	0.21951	0.217774	0.217583	0.218175	0.225253	0.194123	0.182695	0.185434	0.190941	0.19878	0.1868	0.208959	0.197035	0.200014	0.202755	0.215956	0.215609	0.191148	0.143834	0.205424	0.202954
0.194527	0.145724	0.18751	0.192384	0.200972	0.172917	0.199723	0.175244	0.198747	0.177253	0.163969	0.0830567	0.160936	0.0886277	0.187551	0.158099	0.188301	0.14689	0.197948	0.200722	0.20938	0.224093	0.210415	0.215761	0.224031	0.221481	0.196887	0.180943	0.188047	0.185784	0.203327	0.174247	0.208572	0.201698	0.204302	0.203378	0.216946	0.227986	0.195154	0.144159	0.204235	0.205613
0.197669	0.146365	0.184042	0.197077	0.189111	0.176441	0.207689	0.181341	0.192416	0.185886	0.155966	0.0773303	0.162012	0.0932377	0.192349	0.160812	0.171957	0.151647	0.213791	0.211866	0.214332	0.22429	0.218558	0.216141	0.233579	0.221431	0.185671	0.182407	0.191643	0.190873	0.19753	0.189435	0.204907	0.20118	0.206661	0.200453	0.222778	0.217479	0.196133	0.150853	0.205328	0.202781
0.185462	0.146149	0.195504	0.182961	0.203866	0.172429	0.203074	0.182108	0.205722	0.18046	0.157145	0.0744673	0.164345	0.101076	0.1981	0.159569	0.168698	0.158649	0.219715	0.210214	0.215692	0.231321	0.205451	0.210113	0.215174	0.212152	0.192346	0.18284	0.1952	0.183311	0.201988	0.172936	0.203645	0.21336	0.205415	0.19001	0.219927	0.211502	0.196541	0.153187	0.199121	0.190638
0.188662	0.12665	0.192237	0.191336	0.188018	0.172986	0.197811	0.177328	0.199999	0.193224	0.158733	0.0850133	0.170614	0.0935724	0.186468	0.162641	0.172664	0.149049	0.209051	0.208022	0.214939	0.220982	0.201129	0.215098	0.21865	0.228505	0.203674	0.187038	0.189897	0.189676	0.198414	0.1862	0.207957	0.21703	0.207491	0.195883	0.223529	0.220241	0.195563	0.143159	0.205286	0.194264
0.200381	0.139938	0.193056	0.184468	0.184616	0.187792	0.203984	0.174236	0.201468	0.173774	0.157241	0.0760207	0.174403	0.0992017	0.197964	0.164684	0.182233	0.145361	0.212102	0.213989	0.219198	0.22331	0.207994	0.216186	0.224773	0.222566	0.189495	0.181691	0.178978	0.184509	0.207673	0.179771	0.209375	0.200266	0.209845	0.191598	0.20823	0.228622	0.195684	0.145127	0.19573	0.205361
0.188692	0.149442	0.184967	0.191816	0.197276	0.180483	0.220892	0.183729	0.200656	0.185575	0.158399	0.0856766	0.163765	0.0990121	0.19798	0.164762	0.174998	0.152525	0.20197	0.196589	0.211325	0.227025	0.205276	0.207504	0.232657	0.228572	0.194409	0.175071	0.187489	0.189295	0.191801	0.179861	0.206733	0.204211	0.208977	0.195156	0.209636	0.22349	0.192342	0.146744	0.204105	0.195546
0.203258	0.13637	0.190686	0.192032	0.197465	0.169848	0.203192	0.177818	0.198837	0.181592	0.167144	0.0746308	0.163824	0.0874467	0.203007	0.163151	0.183393	0.15563	0.208247	0.210262	0.203116	0.221498	0.216087	0.222498	0.225456	0.220505	0.186078	0.177764	0.181348	0.188889	0.191761	0.176669	0.209735	0.1984	0.213943	0.190976	0.218404	0.213904	0.189255	0.145059	0.201932	0.202818
0.193071	0.144088	0.190318	0.187732	0.192132	0.180372	0.209738	0.171847	0.195274	0.182267	0.159199	0.0758756	0.16688	0.0989984	0.188773	0.168273	0.177209	0.152668	0.210091	0.212561	0.211039	0.235817	0.210233	0.220649	0.205131	0.221959	0.194011	0.174756	0.189807	0.18046	0.198181	0.180013	0.199468	0.199107	0.207547	0.202587	0.218269	0.223714	0.19425	0.139769	0.209042	0.207896
0.205871	0.140082	0.193688	0.190464	0.190546	0.164048	0.205415	0.176196	0.200262	0.188378	0.166532	0.0850734	0.163044	0.104431	0.213287	0.158707	0.173944	0.146123	0.208856	0.205226	0.22552	0.208483	0.217688	0.211719	0.213257	0.229436	0.196246	0.18029	0.192016	0.186503	0.197779	0.173489	0.197458	0.213865	0.205501	0.204365	0.222653	0.213971	0.186788	0.142504	0.212656	0.207452
0.192909	0.155263	0.193614	0.191865	0.206047	0.178865	0.202506	0.180458	0.202801	0.173164	0.165621	0.0815195	0.169268	0.109036	0.189894	0.158633	0.165977	0.152259	0.207991	0.203457	0.211668	0.215749	0.215476	0.224291	0.226227	0.225843	0.194595	0.171122	0.190491	0.187499	0.194409	0.174481	0.207148	0.193832	0.209929	0.198081	0.219396	0.214831	0.182589	0.154285	0.202908	0.201468
0.195364	0.141559	0.190356	0.175293	0.191149	0.164437	0.198605	0.165816	0.199169	0.178447	0.16267	0.0789377	0.149374	0.0947062	0.205372	0.159703	0.179182	0.148801	0.215287	0.210961	0.211152	0.242109	0.212556	0.218079	0.21987	0.221659	0.19486	0.17097	0.194349	0.190809	0.203466	0.176256	0.203216	0.18572	0.209665	0.197623	0.212473	0.210681	0.190422	0.163684	0.204538	0.208058
0.2138	0.135404	0.192192	0.17627	0.192194	0.177629	0.20509	0.181019	0.189977	0.183156	0.15894	0.069938	0.168899	0.10305	0.185081	0.162461	0.176502	0.132677	0.215012	0.200775	0.211878	0.227053	0.217647	0.224308	0.221914	0.224309	0.192658	0.165534	0.185397	0.184617	0.190421	0.186497	0.19956	0.202134	0.213619	0.199425	0.228147	0.224135	0.188723	0.145232	0.204436	0.204591
0.193514	0.149785	0.194134	0.187546	0.196564	0.185784	0.211743	0.182068	0.197515	0.195511	0.154369	0.0628054	0.168903	0.09254	0.202905	0.171291	0.180188	0.153094	0.206827	0.210402	0.215605	0.224917	0.215485	0.214821	0.226279	0.229128	0.190072	0.175525	0.190797	0.186868	0.205291	0.189233	0.204663	0.201656	0.195084	0.193376	0.219403	0.21684	0.198821	0.133497	0.20158	0.198492
0.185596	0.136224	0.192558	0.187342	0.197554	0.16269	0.208839	0.179759	0.182122	0.182843	0.169984	0.0753633	0.166761	0.0967604	0.203117	0.167464	0.167101	0.148932	0.199422	0.200895	0.206896	0.221622	0.21733	0.204726	0.219386	0.22041	0.194423	0.176209	0.195308	0.181116	0.204348	0.184058	0.206313	0.19017	0.208111	0.19987	0.225374	0.217945	0.199611	0.143052	0.202078	0.201641
0.200653	0.151387	0.192048	0.180293	0.208418	0.183783	0.215803	0.18856	0.201083	0.190988	0.160938	0.0697037	0.159903	0.0979868	0.196982	0.173157	0.171754	0.15332	0.2071	0.21152	0.210904	0.223863	0.203431	0.21828	0.212302	0.224994	0.188594	0.187436	0.191076	0.187507	0.192861	0.185363	0.211963	0.204639	0.19598	0.202042	0.215698	0.221935	0.186691	0.144141	0.202085	0.200699
0.200182	0.120313	0.196003	0.193735	0.194494	0.171321	0.205346	0.17866	0.204837	0.181326	0.161748	0.0750931	0.169625	0.0956006	0.193766	0.163221	0.178538	0.153166	0.215629	0.212602	0.21232	0.22055	0.222436	0.219812	0.215729	0.227574	0.189619	0.179931	0.193276	0.185085	0.19139	0.170926	0.209056	0.204105	0.209771	0.192981	0.206315	0.218696	0.179905	0.149802	0.199763	0.207684
0.206244	0.139227	0.195158	0.197856	0.202409	0.175986	0.209849	0.180271	0.198995	0.170879	0.170161	0.0717633	0.159415	0.0918817	0.192727	0.158676	0.165755	0.148598	0.203471	0.206257	0.20841	0.22184	0.21664	0.213399	0.217416	0.22169	0.191017	0.17733	0.197462	0.189909	0.200649	0.192408	0.210689	0.209484	0.197155	0.202719	0.216779	0.210478	0.17127	0.141261	0.206718	0.2004
0.181606	0.142989	0.201842	0.180244	0.187408	0.178961	0.216744	0.170054	0.203728	0.180971	0.162168	0.0736921	0.174681	0.097246	0.195991	0.176028	0.176683	0.150334	0.204878	0.216831	0.216262	0.217414	0.217715	0.222248	0.217978	0.223638	0.192262	0.182376	0.189095	0.174999	0.194993	0.179452	0.200117	0.201275	0.206639	0.201408	0.220863	0.223026	0.176043	0.15325	0.200229	0.196926
0.195653	0.147879	0.198869	0.181337	0.19882	0.177417	0.210233	0.176226	0.189986	0.181274	0.153086	0.0733473	0.160635	0.0963892	0.201679	0.160507	0.179334	0.148055	0.20784	0.209113	0.215848	0.222564	0.21025	0.203469	0.225315	0.221442	0.19207	0.190359	0.194502	0.188138	0.191029	0.187197	0.198686	0.198052	0.209261	0.199168	0.215838	0.221689	0.197273	0.14434	0.206769	0.203557
0.192273	0.137481	0.188649	0.187508	0.188308	0.176383	0.199851	0.181862	0.183491	0.180322	0.159987	0.0702883	0.154616	0.105001	0.201765	0.165372	0.173668	0.162106	0.202644	0.20676	0.213415	0.221843	0.214568	0.214551	0.224084	0.227034	0.190471	0.178058	0.197965	0.199467	0.198402	0.178943	0.203672	0.200831	0.218637	0.195891	0.217827	0.223827	0.196916	0.14414	0.206544	0.19534
0.201185	0.146395	0.189902	0.186901	0.195174	0.169875	0.207182	0.181642	0.198639	0.187318	0.163512	0.0720957	0.166459	0.0997365	0.186658	0.16775	0.177854	0.153487	0.221739	0.197223	0.203612	0.221003	0.214197	0.224663	0.225788	0.224201	0.199649	0.191093	0.183572	0.189277	0.190916	0.174016	0.204678	0.195294	0.205537	0.195074	0.223687	0.219808	0.185829	0.14835	0.202055	0.208237
0.19927	0.14353	0.193548	0.186596	0.19302	0.171573	0.2107	0.178784	0.196743	0.177594	0.163115	0.0747851	0.162544	0.0893941	0.198284	0.16116	0.169551	0.145977	0.199533	0.218913	0.213531	0.230577	0.207553	0.211397	0.215915	0.230932	0.194295	0.175846	0.196951	0.187877	0.200224	0.18315	0.206325	0.192191	0.203973	0.198526	0.21572	0.216802	0.199609	0.123416	0.20957	0.203106
0.196297	0.145556	0.187285	0.191774	0.192686	0.181053	0.212787	0.18384	0.200154	0.18109	0.155252	0.0834125	0.165898	0.0944204	0.186123	0.162506	0.177382	0.15882	0.212364	0.199674	0.224885	0.216976	0.211105	0.209674	0.22862	0.231012	0.190323	0.180689	0.195037	0.188465	0.198514	0.178942	0.207116	0.204354	0.213693	0.198054	0.219217	0.223815	0.196023	0.150793	0.200041	0.205678
0.191561	0.145601	0.192957	0.186202	0.189033	0.17369	0.199306	0.179724	0.196255	0.187099	0.148968	0.0742104	0.165579	0.0936759	0.202264	0.166835	0.1707	0.122572	0.209172	0.201275	0.215061	0.227899	0.215626	0.21351	0.211894	0.218313	0.192726	0.182023	0.185137	0.189261	0.19759	0.167689	0.21466	0.204567	0.206737	0.204688	0.216065	0.222238	0.192992	0.13982	0.20616	0.20233
0.188785	0.136512	0.191319	0.197035	0.194757	0.166611	0.202663	0.178504	0.194272	0.190869	0.17323	0.0753228	0.166241	0.0915921	0.192149	0.164434	0.171253	0.150032	0.209939	0.211613	0.216723	0.228641	0.221681	0.212331	0.224393	0.222231	0.199273	0.18001	0.195921	0.194281	0.202812	0.177061	0.204255	0.198413	0.205019	0.205149	0.219144	0.212145	0.19583	0.140999	0.205929	0.193849
0.209853	0.143323	0.181436	0.179025	0.191398	0.165775	0.206295	0.18087	0.204532	0.188251	0.161776	0.0747952	0.159682	0.102333	0.191187	0.158618	0.171456	0.149311	0.209889	0.198438	0.21287	0.225842	0.209456	0.208447	0.224742	0.224905	0.188491	0.18052	0.192352	0.187462	0.196386	0.167815	0.194751	0.203464	0.208281	0.190026	0.223986	0.212025	0.183499	0.148524	0.205527	0.205933
0.210584	0.142687	0.188166	0.197868	0.186328	0.177998	0.20446	0.187274	0.206774	0.173532	0.163023	0.0785702	0.156284	0.0936707	0.196151	0.163068	0.156861	0.14667	0.222471	0.209969	0.212326	0.221623	0.193486	0.214969	0.214953	0.229378	0.192697	0.177005	0.195666	0.194446	0.188207	0.184442	0.202701	0.200558	0.214759	0.184846	0.219335	0.21077	0.198176	0.14878	0.218233	0.200702
0.190474	0.130836	0.20278	0.185837	0.186399	0.174831	0.193789	0.170764	0.183163	0.189692	0.15769	0.0773127	0.161909	0.101047	0.194664	0.161719	0.177283	0.147526	0.202558	0.212941	0.212325	0.213455	0.212942	0.201489	0.225341	0.227501	0.192719	0.174011	0.182301	0.181522	0.198351	0.180584	0.189093	0.201203	0.20101	0.2006	0.214189	0.208508	0.194731	0.146385	0.196807	0.196286
0.204172	0.146576	0.192643	0.189596	0.191707	0.180607	0.210955	0.174541	0.199128	0.182923	0.164871	0.076331	0.161915	0.101177	0.197184	0.156117	0.175562	0.157974	0.205567	0.202582	0.209597	0.227964	0.213574	0.216924	0.210906	0.226578	0.194129	0.17933	0.195135	0.195692	0.194907	0.18166	0.205181	0.20586	0.2037	0.202834	0.218441	0.222424	0.196157	0.144036	0.207518	0.201042
0.199146	0.142611	0.198914	0.19671	0.1891	0.176621	0.199368	0.183402	0.197539	0.187013	0.155	0.0839016	0.155378	0.0893138	0.200366	0.15579	0.17235	0.148508	0.216083	0.212974	0.205306	0.209957	0.212236	0.210125	0.217715	0.209827	0.194643	0.176723	0.187597	0.189265	0.199373	0.180898	0.209654	0.199399	0.20373	0.189447	0.219714	0.228648	0.185649	0.144211	0.204398	0.207786
0.198501	0.140171	0.202934	0.188337	0.182262	0.163968	0.2081	0.183606	0.202865	0.176509	0.161996	0.0780018	0.165405	0.0984271	0.200976	0.15758	0.167067	0.148263	0.201896	0.199554	0.216239	0.221778	0.214256	0.214002	0.219157	0.223616	0.193035	0.188324	0.19659	0.189104	0.190881	0.181306	0.206924	0.20592	0.202901	0.202503	0.219223	0.219271	0.18829	0.151914	0.197335	0.200603
0.191669	0.139457	0.19488	0.183814	0.194414	0.169461	0.199871	0.176858	0.198977	0.191841	0.150325	0.0802673	0.165333	0.0891828	0.194038	0.163379	0.17211	0.14783	0.205724	0.208272	0.211654	0.225189	0.210555	0.219773	0.222813	0.226712	0.199003	0.17584	0.191555	0.192859	0.202857	0.185956	0.197255	0.200934	0.208965	0.206206	0.220384	0.224541	0.191313	0.144033	0.221101	0.200145
0.187508	0.135918	0.180317	0.184814	0.193345	0.189465	0.209656	0.170669	0.208434	0.179799	0.161091	0.0707651	0.168308	0.0921363	0.204764	0.155962	0.171407	0.157013	0.210201	0.198016	0.209504	0.224814	0.212562	0.208661	0.206849	0.222657	0.186184	0.188542	0.196022	0.185161	0.186975	0.174395	0.207447	0.199976	0.203118	0.200186	0.225676	0.219514	0.188819	0.143391	0.204745	0.205868
0.205938	0.141354	0.18734	0.192922	0.195077	0.18002	0.216277	0.172973	0.205615	0.186687	0.159609	0.0715014	0.1597	0.103154	0.195032	0.161131	0.168476	0.156545	0.202183	0.195547	0.210673	0.223324	0.209803	0.215463	0.222942	0.238851	0.196259	0.173547	0.187755	0.185817	0.20854	0.180516	0.210939	0.197799	0.207747	0.204902	0.224349	0.211232	0.196383	0.142953	0.207202	0.194138
0.208232	0.139147	0.190679	0.190157	0.197374	0.172356	0.201726	0.169675	0.195542	0.180105	0.161304	0.0788491	0.166554	0.103424	0.191502	0.152189	0.169245	0.143344	0.218572	0.197014	0.215403	0.225084	0.210576	0.219424	0.216713	0.22672	0.203584	0.181564	0.191712	0.182614	0.198442	0.176703	0.204899	0.200651	0.204852	0.199999	0.213083	0.228495	0.197143	0.150668	0.216617	0.203536
0.192476	0.142983	0.186258	0.179721	0.192272	0.184733	0.204516	0.17678	0.19608	0.185332	0.155718	0.074997	0.159412	0.0987492	0.195779	0.162197	0.175657	0.149109	0.209869	0.215749	0.211443	0.214862	0.209115	0.210284	0.215568	0.222664	0.195716	0.175254	0.184228	0.20647	0.193488	0.175076	0.199852	0.202914	0.206499	0.194169	0.210633	0.22	0.186724	0.15082	0.205137	0.206608
0.19792	0.14059	0.192416	0.186285	0.194806	0.171873	0.209422	0.17709	0.198211	0.194491	0.164583	0.0833156	0.166867	0.108702	0.204254	0.171964	0.161608	0.15615	0.213413	0.203815	0.20419	0.220905	0.20839	0.215746	0.221841	0.233453	0.199521	0.181667	0.19653	0.184924	0.201032	0.181182	0.209531	0.199772	0.207675	0.190067	0.220484	0.222344	0.19592	0.132293	0.196477	0.187822
0.202506	0.135198	0.18998	0.176806	0.196607	0.181071	0.190858	0.185663	0.197574	0.182308	0.159255	0.0653081	0.157126	0.0973213	0.194768	0.162265	0.162998	0.145347	0.209942	0.194349	0.20999	0.22881	0.217658	0.214218	0.218654	0.229343	0.18759	0.182828	0.190452	0.194265	0.192961	0.175251	0.19715	0.204559	0.205627	0.198037	0.204813	0.221192	0.186089	0.140943	0.19761	0.210521
0.192003	0.145113	0.193792	0.18569	0.196528	0.174827	0.204741	0.181737	0.196374	0.192308	0.171272	0.069739	0.167716	0.0861707	0.209837	0.171067	0.17585	0.153001	0.203941	0.195614	0.215552	0.217797	0.206741	0.212719	0.231639	0.225384	0.187313	0.177757	0.198799	0.194568	0.19347	0.182662	0.209066	0.200066	0.214206	0.200334	0.218308	0.212835	0.19097	0.135344	0.202259	0.200799
0.198832	0.139399	0.190404	0.186249	0.187577	0.160127	0.205455	0.167488	0.194681	0.1848	0.158863	0.0772967	0.160598	0.104047	0.194211	0.15718	0.178131	0.146078	0.203046	0.201152	0.216371	0.209297	0.218355	0.216685	0.211955	0.227406	0.189959	0.181107	0.1963	0.186508	0.19642	0.182912	0.20542	0.200113	0.216365	0.200084	0.220952	0.217063	0.19077	0.145575	0.211947	0.201586
0.191951	0.138179	0.190704	0.191218	0.191192	0.176824	0.200904	0.178125	0.197528	0.184182	0.158188	0.075792	0.17184	0.113385	0.195887	0.162532	0.167082	0.148462	0.216469	0.20029	0.207512	0.213859	0.213187	0.215519	0.22556	0.222931	0.181477	0.170936	0.187802	0.180927	0.203087	0.181448	0.211913	0.205622	0.20431	0.197007	0.217504	0.216183	0.18794	0.137951	0.200074	0.203522
0.180165	0.140594	0.186152	0.183553	0.188286	0.163125	0.208064	0.182003	0.203661	0.194608	0.166488	0.0716317	0.152144	0.0928031	0.213819	0.161842	0.177819	0.154328	0.204984	0.196347	0.210032	0.217491	0.202469	0.217859	0.221228	0.221211	0.1897	0.184475	0.189425	0.186601	0.196971	0.176884	0.205292	0.20721	0.210208	0.193134	0.223491	0.213266	0.183646	0.143535	0.207883	0.209584
0.198219	0.142896	0.19292	0.197083	0.19929	0.174384	0.199753	0.166583	0.197312	0.181489	0.169887	0.0691824	0.163852	0.0988877	0.191984	0.156735	0.174018	0.13938	0.199142	0.204894	0.211411	0.227487	0.213897	0.226365	0.212217	0.221754	0.201753	0.186248	0.189035	0.19003	0.1982	0.184245	0.201161	0.206094	0.212302	0.202002	0.20524	0.231379	0.18605	0.146165	0.207019	0.1996
0.192203	0.145262	0.194394	0.189911	0.186968	0.174834	0.202455	0.175659	0.199877	0.187677	0.155489	0.0697235	0.164297	0.0974555	0.196233	0.174468	0.173407	0.152658	0.201493	0.202608	0.220965	0.228681	0.210953	0.211448	0.220091	0.216285	0.195328	0.180004	0.19645	0.193593	0.202912	0.187688	0.200044	0.20733	0.199283	0.197308	0.216699	0.221718	0.194136	0.150885	0.204394	0.206825
0.201313	0.13803	0.19124	0.184636	0.196402	0.164069	0.209568	0.178526	0.201712	0.180824	0.165396	0.0765497	0.156416	0.103211	0.196648	0.170208	0.165522	0.147796	0.211803	0.210935	0.211596	0.221274	0.212522	0.217037	0.210668	0.215244	0.207154	0.169236	0.185471	0.195577	0.197836	0.182448	0.196584	0.203519	0.203009	0.190219	0.226085	0.215101	0.192302	0.138475	0.216311	0.202365
0.20522	0.152272	0.181468	0.188449	0.189549	0.173796	0.200897	0.184279	0.198039	0.179347	0.160529	0.0783199	0.151807	0.104552	0.198686	0.166993	0.173975	0.143155	0.205526	0.213272	0.209046	0.225269	0.212773	0.2202	0.213993	0.223309	0.196241	0.179053	0.196704	0.187796	0.196445	0.188748	0.192506	0.207895	0.201804	0.189274	0.226017	0.223276	0.185647	0.147706	0.204348	0.197608
0.207357	0.142248	0.190632	0.192454	0.192152	0.180221	0.206836	0.184496	0.198227	0.18058	0.165864	0.0667031	0.162014	0.0907547	0.197066	0.150849	0.161848	0.147059	0.208966	0.208644	0.209645	0.229422	0.213184	0.212256	0.22083	0.213862	0.1804	0.174268	0.184561	0.192849	0.196189	0.186342	0.20527	0.20077	0.21516	0.190726	0.224023	0.22398	0.185472	0.143264	0.202044	0.201545
0.204614	0.134775	0.188763	0.187574	0.193832	0.177506	0.200885	0.18412	0.202335	0.17787	0.155044	0.070223	0.170904	0.100472	0.189254	0.165615	0.172371	0.144064	0.192412	0.202306	0.217344	0.23167	0.221358	0.218592	0.219084	0.229209	0.195407	0.175712	0.197266	0.195141	0.204425	0.179015	0.201835	0.200685	0.212817	0.200514	0.218148	0.2086	0.190412	0.147206	0.20265	0.21334
0.17787	0.144085	0.192944	0.191882	0.197635	0.175917	0.203911	0.184404	0.197077	0.17632	0.148775	0.0786883	0.162264	0.0976317	0.193212	0.162376	0.171098	0.14948	0.208693	0.197664	0.215987	0.217724	0.215399	0.21859	0.216679	0.222863	0.199212	0.180594	0.200129	0.191257	0.198821	0.184614	0.212335	0.203746	0.21213	0.195544	0.212006	0.216068	0.187951	0.139508	0.196264	0.205924
0.188386	0.147481	0.200143	0.185304	0.19454	0.17617	0.20259	0.182163	0.203319	0.183811	0.153009	0.0747676	0.166058	0.0980118	0.194209	0.166117	0.170367	0.141396	0.212894	0.207656	0.204755	0.235731	0.204133	0.220577	0.223226	0.227109	0.187783	0.189452	0.18873	0.184259	0.195041	0.182643	0.20004	0.19624	0.211989	0.198887	0.214887	0.210072	0.192084	0.149472	0.196251	0.203196
0.202405	0.135661	0.178126	0.193065	0.18866	0.177989	0.206227	0.178493	0.194924	0.178848	0.163684	0.0759198	0.170655	0.0820656	0.201322	0.173478	0.172767	0.143173	0.212659	0.20285	0.21129	0.220345	0.216775	0.203083	0.228202	0.226893	0.203003	0.18477	0.193152	0.180734	0.203338	0.175727	0.209801	0.205711	0.205665	0.190744	0.217765	0.20497	0.192424	0.144647	0.200577	0.196428
0.201762	0.132702	0.192337	0.190309	0.194105	0.17313	0.206954	0.183609	0.185618	0.179411	0.15756	0.0711276	0.163498	0.105372	0.185467	0.156088	0.172844	0.15065	0.217219	0.205887	0.21633	0.219728	0.21366	0.211819	0.218736	0.219289	0.199652	0.189712	0.188875	0.190396	0.194687	0.18756	0.203249	0.204072	0.197189	0.195567	0.218042	0.230693	0.197007	0.140135	0.200448	0.209137
0.184832	0.131242	0.194305	0.192126	0.195924	0.178521	0.21018	0.186936	0.209884	0.170323	0.155225	0.0781249	0.161122	0.0919547	0.193635	0.169812	0.174931	0.151516	0.205407	0.212674	0.209353	0.209552	0.205494	0.217214	0.223632	0.223505	0.190825	0.183597	0.199321	0.193463	0.203714	0.184988	0.205134	0.208209	0.208607	0.209612	0.214539	0.225916	0.183187	0.145088	0.20149	0.192573
0.193088	0.129485	0.190937	0.178892	0.20396	0.174335	0.204888	0.183955	0.189778	0.188455	0.158565	0.0783142	0.163798	0.0959179	0.186339	0.164409	0.173056	0.155444	0.206246	0.213107	0.21196	0.221275	0.204569	0.200692	0.213477	0.216125	0.204343	0.177035	0.201782	0.189017	0.198534	0.188419	0.19704	0.214005	0.204288	0.203281	0.212777	0.224101	0.189995	0.137049	0.200269	0.207791
0.196401	0.131311	0.187278	0.18637	0.187339	0.171856	0.210406	0.173085	0.188475	0.173482	0.165648	0.0777228	0.167488	0.0983576	0.200265	0.159611	0.173825	0.146903	0.21506	0.205028	0.199508	0.222529	0.214318	0.218713	0.217893	0.218032	0.205891	0.176084	0.203693	0.187755	0.199556	0.184922	0.202739	0.194957	0.201524	0.197434	0.222446	0.216735	0.189769	0.130771	0.20674	0.206485
0.19945	0.133714	0.18641	0.187117	0.209851	0.159549	0.207973	0.17544	0.201913	0.176946	0.162892	0.0852064	0.16301	0.0996641	0.198965	0.165383	0.164408	0.1491	0.209945	0.211715	0.213508	0.237006	0.206014	0.200888	0.222328	0.215769	0.197541	0.186415	0.188594	0.198159	0.196886	0.182866	0.206961	0.203212	0.211275	0.200388	0.217715	0.214126	0.182577	0.14203	0.206161	0.195155
0.202135	0.1358	0.195103	0.194419	0.19605	0.176033	0.207466	0.174295	0.191966	0.191674	0.153507	0.0809274	0.167632	0.105038	0.193903	0.159526	0.161419	0.145383	0.206671	0.20008	0.205075	0.225401	0.20602	0.214217	0.226151	0.228026	0.190342	0.178227	0.196121	0.186609	0.192398	0.192179	0.20251	0.208693	0.201849	0.194116	0.220113	0.214694	0.200592	0.127862	0.215293	0.209869
0.189521	0.13639	0.196609	0.190829	0.197045	0.180489	0.2024	0.172241	0.192887	0.182641	0.164392	0.0806843	0.159474	0.10675	0.19332	0.165709	0.167643	0.149694	0.210057	0.208635	0.213429	0.218964	0.208452	0.216719	0.223552	0.223492	0.189174	0.176006	0.195725	0.184764	0.197591	0.178038	0.200543	0.207513	0.202653	0.1911	0.222412	0.219764	0.185611	0.14237	0.207935	0.206272
0.192931	0.145484	0.200555	0.18813	0.195096	0.182651	0.209599	0.173525	0.201505	0.18029	0.159494	0.083037	0.169614	0.0923091	0.208459	0.160672	0.179117	0.142053	0.21248	0.198995	0.208958	0.223919	0.201928	0.204355	0.230419	0.224925	0.183445	0.181004	0.188531	0.197236	0.206116	0.182911	0.200783	0.19706	0.211367	0.196601	0.221226	0.220381	0.18706	0.134814	0.20425	0.195493
0.184674	0.144182	0.189393	0.185015	0.191251	0.174786	0.209625	0.185566	0.193515	0.171262	0.164854	0.0786168	0.160122	0.093308	0.196178	0.159253	0.169458	0.15763	0.224583	0.207337	0.218547	0.227155	0.209978	0.207977	0.213729	0.224927	0.203678	0.18116	0.183206	0.178499	0.200479	0.191429	0.209398	0.198227	0.209069	0.19364	0.21786	0.219701	0.176362	0.14166	0.212592	0.208745
0.197935	0.141545	0.181551	0.183741	0.193823	0.177335	0.205677	0.184324	0.19639	0.185351	0.156884	0.0764424	0.165854	0.0974982	0.200953	0.156189	0.169267	0.139527	0.210878	0.202644	0.22515	0.220516	0.206759	0.215594	0.219136	0.223911	0.199128	0.180567	0.193254	0.190842	0.194879	0.188261	0.205012	0.197663	0.212477	0.195242	0.221082	0.224689	0.19093	0.145909	0.198578	0.197261
0.20323	0.137696	0.201178	0.180064	0.182176	0.157238	0.200564	0.183763	0.199452	0.181825	0.155978	0.0767974	0.161632	0.0974997	0.191857	0.151275	0.177908	0.143754	0.197751	0.214301	0.212422	0.225012	0.217145	0.20956	0.223267	0.224471	0.192594	0.173368	0.186873	0.192216	0.202711	0.179651	0.201699	0.206365	0.204681	0.200305	0.215999	0.216252	0.180229	0.144488	0.206008	0.203465
0.196648	0.137615	0.189644	0.188841	0.188952	0.182499	0.201997	0.1795	0.199338	0.19157	0.146315	0.0799412	0.151896	0.094683	0.197989	0.159977	0.171962	0.146062	0.20749	0.20953	0.212523	0.224505	0.211377	0.22276	0.214632	0.229357	0.191635	0.178615	0.19427	0.199365	0.19956	0.175257	0.211394	0.20942	0.2027	0.18219	0.221437	0.210945	0.1948	0.136878	0.198955	0.193246
0.197548	0.143297	0.197209	0.183144	0.194157	0.177353	0.21124	0.176732	0.197367	0.187841	0.165035	0.0733936	0.159148	0.104047	0.185064	0.155254	0.170555	0.142647	0.197561	0.194234	0.21313	0.213773	0.21014	0.208423	0.220559	0.223093	0.186791	0.171466	0.192775	0.182634	0.199576	0.18359	0.198895	0.199222	0.211725	0.201447	0.216497	0.21977	0.19546	0.142573	0.21632	0.197431
0.185714	0.137396	0.183503	0.184525	0.198787	0.172046	0.199559	0.192528	0.198869	0.179447	0.156425	0.0813024	0.156258	0.10631	0.195911	0.16983	0.167429	0.146574	0.215474	0.205815	0.204393	0.218451	0.205762	0.218642	0.214297	0.229164	0.202229	0.175354	0.192836	0.186893	0.194631	0.190187	0.209734	0.200695	0.209512	0.200482	0.215438	0.203011	0.189992	0.147331	0.20308	0.197077
0.196503	0.147167	0.204158	0.19229	0.19509	0.169353	0.209683	0.188796	0.200142	0.185554	0.175689	0.0689358	0.16292	0.0994974	0.201492	0.153908	0.168932	0.142841	0.212744	0.206196	0.211861	0.229257	0.21008	0.206957	0.220609	0.225175	0.190742	0.17184	0.180352	0.195342	0.199907	0.18299	0.20459	0.204637	0.207561	0.201103	0.220075	0.224152	0.189286	0.150286	0.193474	0.208355
0.189184	0.146335	0.196355	0.193137	0.191303	0.174101	0.214689	0.190645	0.203798	0.187874	0.157889	0.0742525	0.158154	0.104049	0.194231	0.171471	0.16238	0.138993	0.210607	0.208862	0.208597	0.219304	0.213529	0.211831	0.221383	0.218168	0.198372	0.182023	0.20067	0.188868	0.197914	0.179633	0.203197	0.186117	0.220143	0.204462	0.210748	0.216074	0.183486	0.143364	0.204886	0.2031
0.192125	0.147804	0.193729	0.192913	0.203628	0.173731	0.200147	0.175839	0.204579	0.188388	0.171036	0.0675848	0.169355	0.0942395	0.201209	0.153658	0.175028	0.151812	0.211627	0.203685	0.212069	0.223476	0.199606	0.214474	0.223122	0.219397	0.198811	0.175223	0.194524	0.18321	0.197377	0.179488	0.203149	0.208696	0.20124	0.19525	0.216306	0.223467	0.196648	0.137501	0.212881	0.203164
0.202059	0.133564	0.196766	0.202102	0.200281	0.174688	0.206079	0.180173	0.203512	0.188684	0.165824	0.0763362	0.158606	0.105941	0.185893	0.162058	0.170176	0.148148	0.202717	0.211053	0.21374	0.229738	0.20289	0.212648	0.221965	0.218842	0.19079	0.177467	0.198267	0.196765	0.197868	0.177346	0.19391	0.194543	0.20794	0.19848	0.213617	0.217588	0.186638	0.149416	0.199123	0.194279
0.185559	0.142822	0.196286	0.19065	0.200289	0.168716	0.211693	0.18348	0.196643	0.192149	0.164406	0.0760387	0.163451	0.0905219	0.198535	0.163903	0.170919	0.14128	0.202499	0.2053	0.212852	0.219106	0.21446	0.208236	0.228618	0.217377	0.18866	0.181094	0.200457	0.189736	0.197565	0.182527	0.207629	0.194268	0.209752	0.205342	0.219517	0.221486	0.190704	0.145692	0.20427	0.199802
0.196589	0.136971	0.184444	0.185084	0.200058	0.179131	0.207467	0.180842	0.186129	0.182801	0.159041	0.0748621	0.150731	0.0920867	0.207545	0.155257	0.170604	0.150567	0.218378	0.209457	0.217765	0.226107	0.212797	0.210262	0.216276	0.231893	0.193826	0.169234	0.190175	0.192685	0.198283	0.178788	0.20347	0.203792	0.20306	0.205865	0.22688	0.227232	0.200621	0.153823	0.208656	0.213013
0.183828	0.143479	0.188449	0.1907	0.189313	0.179776	0.207657	0.177677	0.194089	0.175126	0.148454	0.0789127	0.158829	0.0977597	0.195533	0.156477	0.174642	0.14563	0.21671	0.199854	0.218085	0.216235	0.213434	0.210051	0.213525	0.227549	0.183411	0.19258	0.187805	0.184534	0.190213	0.187548	0.210575	0.207487	0.210955	0.202841	0.221023	0.217381	0.188446	0.146765	0.205042	0.195451
0.192389	0.146458	0.192549	0.178405	0.198603	0.176776	0.222848	0.176244	0.194975	0.188914	0.163382	0.0718237	0.167244	0.0924535	0.206023	0.163223	0.171626	0.145323	0.207077	0.215173	0.221274	0.220386	0.209554	0.212972	0.223645	0.224664	0.188814	0.177255	0.197372	0.192766	0.194375	0.177316	0.209437	0.197922	0.206191	0.192533	0.217221	0.220597	0.186326	0.139411	0.19816	0.210038
0.194377	0.133188	0.192043	0.18953	0.198926	0.169995	0.210885	0.184636	0.196717	0.186078	0.162385	0.0738822	0.157912	0.0866618	0.194677	0.164931	0.17207	0.151376	0.219717	0.209955	0.210508	0.214873	0.210272	0.211821	0.221094	0.22436	0.193556	0.176605	0.195276	0.190032	0.195044	0.187307	0.204221	0.198093	0.20592	0.19504	0.218125	0.218324	0.191462	0.1429	0.204828	0.20345
0.204972	0.141426	0.199258	0.18815	0.194914	0.177857	0.208031	0.179877	0.191491	0.179496	0.159239	0.0802608	0.171554	0.08147	0.196904	0.167671	0.164867	0.153713	0.196843	0.208365	0.214917	0.218702	0.196733	0.212529	0.22375	0.226168	0.198684	0.179091	0.19317	0.192112	0.196575	0.175035	0.21293	0.195623	0.213186	0.198861	0.227719	0.218838	0.193244	0.158985	0.214403	0.203066
0.203863	0.136948	0.192604	0.191502	0.19454	0.179219	0.199414	0.1836	0.196736	0.17627	0.171136	0.0772389	0.165469	0.0972597	0.199223	0.15856	0.17293	0.146006	0.208153	0.20443	0.217418	0.226752	0.215	0.211462	0.233099	0.226458	0.192673	0.174412	0.203426	0.195121	0.192417	0.177224	0.20431	0.198638	0.217595	0.207328	0.209378	0.231401	0.187069	0.145386	0.209152	0.204011
0.199842	0.1401	0.191811	0.19928	0.201222	0.169899	0.205508	0.176644	0.204414	0.185396	0.149716	0.0786136	0.159122	0.095591	0.188849	0.165079	0.174327	0.146388	0.208569	0.211984	0.207532	0.217852	0.216274	0.211642	0.21948	0.22792	0.193857	0.173973	0.196374	0.191683	0.196574	0.182692	0.207917	0.189207	0.209429	0.187168	0.218538	0.221907	0.200245	0.148567	0.196984	0.203017
0.192958	0.135191	0.202251	0.187747	0.182903	0.180106	0.201314	0.19027	0.203822	0.180307	0.166234	0.0755489	0.161536	0.105311	0.199966	0.170578	0.177755	0.150848	0.205276	0.206572	0.216261	0.229946	0.210392	0.216193	0.224667	0.229541	0.192155	0.171134	0.197479	0.186738	0.18769	0.180689	0.211189	0.201762	0.206364	0.204288	0.218964	0.220904	0.194365	0.14937	0.207529	0.200486
0.195559	0.145892	0.191768	0.187124	0.195061	0.171569	0.196384	0.18601	0.204571	0.191709	0.174122	0.0669423	0.167081	0.0923382	0.198227	0.160038	0.181382	0.142985	0.204305	0.193359	0.215274	0.2338	0.217821	0.219042	0.210937	0.2279	0.180604	0.180593	0.191086	0.190644	0.187449	0.183134	0.211862	0.195851	0.215795	0.197579	0.223471	0.224506	0.187598	0.142013	0.200478	0.192582
0.197091	0.142929	0.195971	0.190971	0.198451	0.164456	0.201696	0.172209	0.186091	0.175929	0.174688	0.0672737	0.16908	0.0974021	0.203771	0.158976	0.166924	0.156035	0.193244	0.216855	0.220437	0.205091	0.219965	0.221727	0.217038	0.233553	0.198637	0.177385	0.185756	0.199258	0.201903	0.191741	0.212474	0.20764	0.210782	0.190422	0.227776	0.214909	0.193176	0.129922	0.208252	0.205289
0.182815	0.152463	0.192526	0.187735	0.201114	0.184293	0.199195	0.181253	0.198645	0.180534	0.156994	0.07437	0.165428	0.099445	0.195868	0.151786	0.174353	0.138516	0.209306	0.1978	0.216799	0.225541	0.207096	0.215442	0.227089	0.216784	0.195536	0.184561	0.179777	0.1964	0.192141	0.182255	0.207426	0.200885	0.195773	0.199098	0.220714	0.218913	0.191259	0.144181	0.201185	0.209128
0.191028	0.137081	0.188632	0.183405	0.189921	0.172457	0.205522	0.187728	0.200345	0.173718	0.161231	0.0708031	0.159075	0.0965833	0.199134	0.162132	0.171771	0.136456	0.20628	0.205437	0.211981	0.23196	0.213466	0.210633	0.220004	0.229465	0.191398	0.176626	0.189661	0.196337	0.203663	0.185964	0.21015	0.19971	0.215243	0.198977	0.21721	0.216195	0.191614	0.147732	0.216476	0.199547
0.204047	0.133792	0.190251	0.184125	0.185377	0.178658	0.193849	0.177344	0.204844	0.188862	0.154041	0.0746093	0.168947	0.097936	0.193157	0.162472	0.179466	0.149829	0.202163	0.188534	0.211116	0.230575	0.200457	0.219344	0.218699	0.227729	0.193527	0.178814	0.193682	0.198316	0.207667	0.184854	0.212608	0.191193	0.207484	0.205651	0.228542	0.21571	0.188807	0.134598	0.203859	0.193227
0.195942	0.138018	0.205781	0.193693	0.19741	0.181122	0.197303	0.175526	0.192387	0.190207	0.164254	0.0859795	0.161509	0.106306	0.199943	0.158618	0.167853	0.157366	0.218449	0.207802	0.212881	0.219762	0.208424	0.218481	0.220528	0.21264	0.17853	0.177332	0.202704	0.189541	0.210401	0.189059	0.202529	0.201276	0.206884	0.197383	0.220407	0.221731	0.184614	0.148919	0.204231	0.195692
0.193593	0.14772	0.18805	0.192243	0.199957	0.177823	0.199129	0.177652	0.208341	0.197396	0.165524	0.0780691	0.171895	0.104189	0.187579	0.158997	0.173946	0.154468	0.202843	0.204514	0.217736	0.221867	0.208783	0.211912	0.221531	0.228178	0.194821	0.17644	0.197233	0.194327	0.191118	0.182329	0.21511	0.198947	0.203506	0.189969	0.224406	0.216914	0.186238	0.140325	0.210125	0.204629
0.193484	0.145332	0.194788	0.190222	0.200176	0.169893	0.202188	0.187964	0.202437	0.186378	0.155559	0.0822063	0.159793	0.0959977	0.195719	0.162398	0.168792	0.14132	0.205807	0.199996	0.210959	0.22129	0.20478	0.19713	0.21992	0.225013	0.186392	0.172143	0.18863	0.184661	0.19883	0.172733	0.21266	0.20615	0.20452	0.196712	0.222794	0.21927	0.193841	0.14353	0.204286	0.210024
0.202074	0.15042	0.199638	0.183467	0.192637	0.173795	0.205018	0.189046	0.195893	0.183464	0.160995	0.0707315	0.16378	0.0848627	0.198413	0.159833	0.170494	0.149443	0.214112	0.19686	0.208123	0.233065	0.206931	0.210824	0.223969	0.225137	0.191649	0.176343	0.196463	0.18494	0.203694	0.180618	0.204028	0.197281	0.207991	0.195438	0.225036	0.226123	0.183658	0.145228	0.196023	0.20401
0.184246	0.142311	0.195852	0.196951	0.200568	0.189306	0.202418	0.181646	0.196499	0.177692	0.151944	0.0774993	0.158267	0.0958643	0.203177	0.164043	0.162366	0.144226	0.203468	0.206653	0.21754	0.220501	0.214491	0.202898	0.218824	0.232972	0.198656	0.178163	0.187905	0.193309	0.195186	0.179588	0.197163	0.203167	0.199313	0.20305	0.209779	0.222891	0.180073	0.14031	0.203505	0.204569
0.195153	0.136312	0.205945	0.187057	0.200019	0.173404	0.206418	0.16926	0.196684	0.185559	0.169768	0.0699249	0.168389	0.0996006	0.207094	0.161549	0.181443	0.152618	0.201665	0.2167	0.216342	0.220164	0.205187	0.215125	0.217749	0.228627	0.205579	0.186221	0.190936	0.193888	0.197685	0.173617	0.201971	0.206413	0.208908	0.199129	0.22324	0.219336	0.191363	0.145436	0.206341	0.210022
0.196071	0.139058	0.185023	0.194242	0.200595	0.178845	0.207476	0.182033	0.193749	0.189826	0.165422	0.079611	0.177147	0.0907824	0.189437	0.163459	0.172274	0.150791	0.211971	0.194242	0.212881	0.217499	0.206305	0.202689	0.210866	0.216598	0.186287	0.172996	0.192043	0.196555	0.197463	0.190517	0.203753	0.202267	0.214635	0.19703	0.207531	0.218801	0.192456	0.145926	0.205289	0.207867
0.194337	0.142572	0.184815	0.183641	0.203816	0.178617	0.205506	0.17228	0.198432	0.186473	0.157659	0.0787829	0.165711	0.0959357	0.2052	0.158159	0.169229	0.159009	0.20697	0.205578	0.216528	0.22563	0.21731	0.213002	0.224947	0.233691	0.19909	0.179678	0.194742	0.189065	0.185566	0.180307	0.200654	0.209258	0.216109	0.19461	0.218392	0.22882	0.176465	0.140806	0.209042	0.195784
0.192821	0.142538	0.185676	0.183822	0.183535	0.16437	0.197197	0.17501	0.202845	0.186485	0.149167	0.0667266	0.165121	0.0939167	0.193976	0.162818	0.164883	0.152434	0.211528	0.209294	0.213178	0.224802	0.218786	0.222931	0.221103	0.228894	0.191299	0.18096	0.197952	0.186693	0.194734	0.182675	0.198063	0.204136	0.208659	0.19986	0.210145	0.211583	0.185055	0.152664	0.209332	0.197781
0.197103	0.144781	0.183405	0.172025	0.196917	0.174683	0.205608	0.184038	0.192525	0.189036	0.162697	0.0751555	0.179966	0.0926553	0.192816	0.170378	0.175056	0.145706	0.211482	0.209513	0.208924	0.218823	0.208715	0.209502	0.224334	0.22281	0.199873	0.179257	0.189796	0.184749	0.189836	0.176818	0.197759	0.200318	0.206781	0.19482	0.223191	0.228469	0.191327	0.13553	0.207844	0.199734
0.196869	0.134326	0.185556	0.189361	0.195646	0.171873	0.209217	0.183563	0.20507	0.180962	0.174181	0.0825943	0.150651	0.0989455	0.199763	0.167369	0.172097	0.134579	0.199359	0.199649	0.207077	0.224041	0.204428	0.213321	0.2249	0.218602	0.199889	0.178553	0.19306	0.191447	0.197517	0.17606	0.205355	0.199522	0.198297	0.19033	0.210371	0.227046	0.193228	0.1366	0.211847	0.204246
0.212092	0.134	0.195114	0.187485	0.193708	0.177837	0.200479	0.182357	0.200979	0.185211	0.155026	0.0765913	0.160867	0.0912757	0.189033	0.159367	0.173616	0.154563	0.203332	0.210201	0.221114	0.224072	0.220876	0.205367	0.222595	0.225782	0.203228	0.170567	0.198569	0.174819	0.201548	0.185392	0.19941	0.193836	0.20707	0.196675	0.223419	0.210978	0.198026	0.159068	0.219681	0.197669
0.187389	0.135763	0.187789	0.187302	0.194455	0.184307	0.203693	0.173223	0.194014	0.178841	0.157923	0.0693246	0.159281	0.0903594	0.19271	0.165215	0.175753	0.149433	0.215859	0.204303	0.21033	0.223115	0.212492	0.215747	0.21611	0.224275	0.19768	0.182368	0.187197	0.187987	0.198711	0.183467	0.209457	0.209282	0.206883	0.1962	0.212569	0.216763	0.193386	0.145256	0.210287	0.210287
0.184233	0.142961	0.194798	0.196825	0.199829	0.172146	0.199847	0.17226	0.188789	0.184811	0.162049	0.0751049	0.157361	0.109785	0.200162	0.157646	0.178183	0.147863	0.211361	0.197853	0.213454	0.221598	0.216263	0.213674	0.215841	0.220621	0.190201	0.180555	0.19377	0.192295	0.196031	0.177277	0.209499	0.196048	0.202221	0.19789	0.22546	0.208736	0.200869	0.143959	0.202738	0.20168
0.186337	0.146046	0.187268	0.194926	0.196577	0.175941	0.20758	0.179841	0.209916	0.195376	0.160366	0.0745077	0.158925	0.0907761	0.203395	0.165708	0.173787	0.158282	0.211116	0.213022	0.206709	0.220648	0.20883	0.210254	0.223749	0.224274	0.19387	0.185571	0.183505	0.189981	0.199776	0.185059	0.212272	0.202249	0.205212	0.191354	0.209885	0.216519	0.193263	0.138876	0.210926	0.198388
0.202108	0.134696	0.196825	0.183228	0.203602	0.165472	0.204412	0.178832	0.204098	0.182436	0.167347	0.0840913	0.164503	0.0951698	0.18902	0.165191	0.174518	0.151795	0.209202	0.198781	0.221738	0.218103	0.222651	0.201786	0.213034	0.218087	0.191478	0.168174	0.193922	0.188058	0.203726	0.187275	0.202717	0.204907	0.209032	0.187433	0.216468	0.214723	0.19416	0.139458	0.208414	0.195614
0.195757	0.141831	0.191614	0.190696	0.198892	0.182384	0.202942	0.184274	0.18816	0.187641	0.159652	0.0762878	0.161215	0.104282	0.197814	0.157173	0.167343	0.154951	0.210416	0.20083	0.217666	0.223215	0.206968	0.215916	0.215051	0.213852	0.191261	0.177717	0.194291	0.191569	0.20038	0.180479	0.205805	0.209739	0.209789	0.193829	0.224184	0.21663	0.187969	0.147687	0.197751	0.201818
0.193304	0.133459	0.198612	0.195412	0.199025	0.169206	0.197835	0.173995	0.195047	0.172875	0.160687	0.0790539	0.157866	0.0924695	0.188905	0.157091	0.176109	0.146385	0.207853	0.211096	0.221064	0.227823	0.222092	0.213314	0.217577	0.214255	0.182846	0.174391	0.188315	0.178449	0.203141	0.184837	0.198766	0.212012	0.210212	0.194795	0.222106	0.216493	0.209085	0.152171	0.210176	0.206702
0.207974	0.139174	0.197997	0.193483	0.183535	0.182335	0.213391	0.180854	0.196797	0.179075	0.156377	0.0830211	0.156914	0.0943768	0.194405	0.159408	0.184201	0.149239	0.219909	0.213521	0.213695	0.229464	0.212709	0.20605	0.214446	0.222213	0.19642	0.176798	0.193294	0.195771	0.196672	0.189647	0.2112	0.193416	0.20862	0.198058	0.214715	0.222058	0.199258	0.141988	0.197388	0.194695
0.194794	0.13668	0.192542	0.191714	0.183955	0.174858	0.204036	0.178463	0.19981	0.182845	0.16375	0.0768798	0.157585	0.0928308	0.196236	0.184202	0.164307	0.14701	0.212146	0.201234	0.20825	0.223105	0.207791	0.207173	0.223441	0.225901	0.192275	0.178843	0.193425	0.186724	0.194427	0.17749	0.207327	0.194081	0.208532	0.198219	0.224538	0.217904	0.183732	0.145505	0.208352	0.195478
0.192368	0.138825	0.194703	0.187436	0.197672	0.178848	0.208073	0.187016	0.200055	0.180064	0.170786	0.0654214	0.15618	0.0963535	0.1966	0.160077	0.167929	0.150324	0.208017	0.210769	0.210819	0.218208	0.209857	0.211951	0.223737	0.223015	0.194576	0.174773	0.195459	0.175225	0.199405	0.188682	0.20279	0.209663	0.21286	0.193716	0.216732	0.231636	0.197621	0.148306	0.205546	0.199609
0.194446	0.141687	0.197494	0.184052	0.200882	0.172157	0.208511	0.178576	0.207484	0.184288	0.156256	0.0775392	0.154337	0.101951	0.188682	0.169343	0.175533	0.143292	0.205836	0.200854	0.207128	0.217098	0.214525	0.209721	0.216805	0.216272	0.194549	0.17807	0.202287	0.196529	0.195597	0.177992	0.215213	0.195027	0.211528	0.20811	0.216721	0.220927	0.197982	0.153476	0.209768	0.189019
0.207507	0.126722	0.191678	0.190291	0.195473	0.174363	0.200518	0.179422	0.204169	0.178249	0.16063	0.0840178	0.151661	0.0917776	0.204813	0.171132	0.169814	0.156983	0.215918	0.205294	0.213039	0.216876	0.212041	0.208678	0.214496	0.214124	0.189061	0.181047	0.192145	0.196485	0.197716	0.179009	0.205449	0.19855	0.208659	0.202204	0.220999	0.207786	0.205311	0.149307	0.205624	0.200141
0.192578	0.133353	0.192164	0.194487	0.187835	0.176576	0.193949	0.182599	0.203979	0.193901	0.159436	0.0780353	0.168158	0.0964652	0.202478	0.167145	0.169016	0.137674	0.217159	0.199466	0.219328	0.227382	0.209406	0.202471	0.228186	0.220744	0.191462	0.177086	0.195181	0.193314	0.196365	0.191556	0.198605	0.201912	0.199908	0.19956	0.214491	0.219249	0.188654	0.151198	0.200879	0.192235
0.205596	0.142802	0.192189	0.182884	0.18985	0.176022	0.204787	0.180783	0.192114	0.178929	0.157246	0.0777903	0.166792	0.0859195	0.197638	0.165226	0.162751	0.147407	0.202996	0.1999	0.21458	0.216354	0.204782	0.220058	0.212835	0.223011	0.192558	0.177713	0.19434	0.183022	0.197885	0.183623	0.209279	0.196496	0.21551	0.197865	0.22084	0.22285	0.189272	0.151286	0.209791	0.203814
0.191823	0.144953	0.192999	0.18911	0.186682	0.184106	0.206895	0.179826	0.205773	0.176197	0.152631	0.0851879	0.166674	0.0926899	0.197099	0.164829	0.16616	0.153961	0.213157	0.203243	0.216141	0.222238	0.22071	0.213008	0.218646	0.221895	0.194794	0.17244	0.199132	0.189305	0.202538	0.188735	0.207596	0.214605	0.209156	0.195286	0.215327	0.224923	0.18038	0.147939	0.200675	0.200269
0.188149	0.141149	0.192348	0.192631	0.189679	0.182918	0.200212	0.181851	0.198758	0.178181	0.159733	0.0811752	0.146143	0.104699	0.194779	0.158463	0.169035	0.157955	0.210183	0.199473	0.213288	0.225567	0.220128	0.208309	0.229778	0.21329	0.187703	0.181632	0.183852	0.17997	0.189664	0.173215	0.20957	0.203999	0.204777	0.199575	0.216285	0.222989	0.19446	0.13279	0.2094	0.203548
0.185955	0.137046	0.183375	0.194488	0.201787	0.187402	0.206358	0.182012	0.19255	0.19329	0.160794	0.0793039	0.167391	0.104562	0.198534	0.167906	0.173707	0.147945	0.204888	0.214696	0.213806	0.215349	0.210896	0.211543	0.225007	0.219547	0.190118	0.178665	0.194755	0.18523	0.189163	0.183181	0.200106	0.212382	0.211229	0.193264	0.217355	0.225371	0.199687	0.145234	0.197569	0.20379
0.195659	0.147574	0.186647	0.186157	0.188127	0.180919	0.206405	0.175219	0.20208	0.194321	0.155975	0.0903237	0.166738	0.0957967	0.201555	0.16791	0.177415	0.149234	0.206562	0.195947	0.203808	0.219582	0.224203	0.206126	0.21729	0.226327	0.195551	0.186743	0.200628	0.182234	0.196346	0.188002	0.209258	0.204379	0.20685	0.18242	0.226365	0.22577	0.187602	0.133598	0.218471	0.200389
0.201409	0.135073	0.187645	0.192738	0.192579	0.17284	0.201118	0.18012	0.198926	0.19041	0.161585	0.0735561	0.162832	0.085168	0.197154	0.155532	0.167236	0.153501	0.203756	0.204074	0.213535	0.229443	0.209267	0.20543	0.214263	0.224637	0.192376	0.177226	0.191356	0.192172	0.205412	0.181149	0.205225	0.203329	0.205268	0.193748	0.215007	0.224361	0.191428	0.147283	0.217344	0.196523
0.193985	0.133918	0.184975	0.185566	0.204155	0.177976	0.209073	0.170227	0.209364	0.177674	0.159475	0.0826287	0.164875	0.0948447	0.198262	0.164587	0.173057	0.141877	0.204855	0.206234	0.209465	0.228845	0.215612	0.202595	0.22537	0.212809	0.193806	0.178753	0.197221	0.188284	0.204349	0.184392	0.196015	0.187781	0.207293	0.203874	0.219944	0.225933	0.182423	0.13784	0.205122	0.204858
0.199423	0.148238	0.190616	0.169393	0.198246	0.169488	0.201328	0.178757	0.206138	0.18309	0.152138	0.0788817	0.166047	0.102716	0.194789	0.161283	0.171988	0.144576	0.209808	0.215853	0.2122	0.220637	0.226304	0.213564	0.222039	0.217645	0.196265	0.17025	0.191168	0.194889	0.200579	0.176867	0.185037	0.202464	0.19748	0.196961	0.208581	0.213605	0.189275	0.139193	0.208232	0.203788
0.203855	0.137864	0.189986	0.202994	0.17743	0.183115	0.209337	0.17982	0.191655	0.186989	0.168737	0.0677317	0.164283	0.107743	0.207145	0.166525	0.180553	0.152294	0.205681	0.204686	0.21685	0.223517	0.20745	0.214658	0.208345	0.222953	0.183688	0.181676	0.199393	0.190044	0.210394	0.176489	0.201056	0.211156	0.2063	0.203971	0.219929	0.220986	0.196186	0.140058	0.197061	0.217181
0.187777	0.139071	0.184822	0.185055	0.19114	0.181459	0.203727	0.18024	0.200355	0.178162	0.164922	0.080462	0.165917	0.106729	0.1964	0.163897	0.164184	0.150202	0.204592	0.205696	0.218646	0.219328	0.215988	0.217352	0.23247	0.227352	0.188097	0.168861	0.194539	0.183662	0.190149	0.179102	0.207364	0.195234	0.20749	0.206378	0.218417	0.219554	0.18778	0.139963	0.20404	0.200483
0.196331	0.132818	0.191962	0.193744	0.191772	0.173534	0.20267	0.1838	0.196299	0.176988	0.156191	0.0881106	0.166887	0.0969601	0.20154	0.170396	0.167481	0.14462	0.208328	0.209183	0.217116	0.225149	0.202723	0.216164	0.222277	0.223208	0.189596	0.189612	0.199403	0.189435	0.193051	0.180944	0.205021	0.191372	0.21138	0.197409	0.229108	0.217599	0.195004	0.138493	0.218729	0.197265
0.194575	0.142962	0.191436	0.189485	0.193992	0.185182	0.210425	0.173902	0.209529	0.183169	0.169357	0.0811552	0.156024	0.0778231	0.195279	0.169927	0.175967	0.149835	0.198169	0.209045	0.22166	0.227342	0.20772	0.221877	0.226268	0.222136	0.199513	0.175791	0.193147	0.193087	0.194428	0.183554	0.207541	0.2073	0.205391	0.206153	0.220723	0.223406	0.196535	0.14551	0.197129	0.191738
0.204951	0.139339	0.197533	0.184405	0.194086	0.186557	0.207153	0.186712	0.197853	0.184671	0.166749	0.074772	0.160723	0.094262	0.197223	0.16328	0.173434	0.139797	0.215422	0.220301	0.220242	0.229598	0.214207	0.225003	0.219547	0.222197	0.197471	0.177858	0.195492	0.190562	0.209815	0.175337	0.209736	0.187394	0.206906	0.201041	0.220326	0.222554	0.193104	0.136391	0.203601	0.204315
0.199112	0.132845	0.205549	0.197064	0.195685	0.170321	0.204241	0.167718	0.197818	0.183485	0.166209	0.0778886	0.163828	0.0915836	0.195046	0.16812	0.17229	0.157094	0.201174	0.211216	0.212698	0.217944	0.21585	0.204794	0.221397	0.222769	0.191513	0.177879	0.191064	0.191864	0.191308	0.184829	0.207672	0.207093	0.214153	0.196738	0.213033	0.221822	0.181279	0.144945	0.20817	0.197786
0.187934	0.144734	0.199157	0.188267	0.198058	0.182388	0.202658	0.178983	0.199761	0.176474	0.175151	0.0905194	0.166073	0.0822829	0.192392	0.16673	0.17099	0.146915	0.210551	0.216489	0.210749	0.223735	0.205357	0.206988	0.21077	0.231551	0.196362	0.178232	0.190252	0.189221	0.206425	0.192982	0.198574	0.203059	0.211631	0.204655	0.223656	0.225388	0.192642	0.150629	0.209068	0.209834
0.197899	0.142356	0.18486	0.186483	0.195353	0.171342	0.206168	0.174718	0.206843	0.186554	0.164122	0.0759939	0.155788	0.0928019	0.189806	0.170395	0.170162	0.158783	0.222792	0.204992	0.209657	0.224396	0.218935	0.211035	0.220185	0.236324	0.19079	0.184636	0.191919	0.193535	0.194859	0.187338	0.211941	0.204754	0.212028	0.193176	0.228341	0.216356	0.202094	0.133319	0.200728	0.201627
0.193646	0.140284	0.179987	0.193633	0.191674	0.166819	0.195733	0.181779	0.203257	0.183316	0.158264	0.070064	0.162798	0.0959101	0.195039	0.171122	0.174986	0.144709	0.206868	0.206913	0.207112	0.22363	0.219652	0.218946	0.2209	0.224499	0.195661	0.177241	0.193782	0.185899	0.193529	0.184808	0.200686	0.202596	0.180337	0.195402	0.219153	0.212121	0.181766	0.145027	0.206533	0.193136
0.190766	0.152159	0.191649	0.189009	0.199291	0.180359	0.198593	0.168751	0.191506	0.177189	0.159674	0.0697475	0.161525	0.102723	0.188032	0.161934	0.183508	0.150468	0.216727	0.210262	0.213092	0.220601	0.210273	0.207357	0.216492	0.228107	0.197834	0.182781	0.199482	0.192549	0.203297	0.177113	0.216938	0.193158	0.207284	0.202203	0.225829	0.216639	0.188691	0.150901	0.200345	0.201649
0.193061	0.138068	0.202288	0.188172	0.19182	0.168142	0.19888	0.165963	0.203826	0.19271	0.159272	0.0690794	0.172023	0.106151	0.197421	0.169128	0.172292	0.150235	0.20147	0.204015	0.210857	0.226033	0.206657	0.214519	0.221965	0.220292	0.192705	0.18149	0.186654	0.187835	0.202331	0.181009	0.206177	0.206123	0.20752	0.197515	0.222823	0.21991	0.18825	0.144878	0.206403	0.211392
0.195404	0.139929	0.185998	0.185829	0.188152	0.176026	0.198381	0.177801	0.198411	0.178354	0.158489	0.0766187	0.156735	0.0924575	0.208959	0.159302	0.177112	0.149206	0.209988	0.199962	0.20686	0.226295	0.220322	0.219177	0.215699	0.21592	0.194445	0.180136	0.194873	0.192415	0.196131	0.177612	0.200551	0.208065	0.206008	0.184432	0.218184	0.20001	0.190755	0.130875	0.208031	0.196288
0.20206	0.144466	0.192713	0.184213	0.196729	0.177823	0.19984	0.170002	0.197382	0.185265	0.161702	0.0735396	0.158891	0.099586	0.200008	0.159758	0.183351	0.151104	0.205119	0.202738	0.20743	0.223516	0.208177	0.213231	0.226583	0.213971	0.187639	0.178945	0.188414	0.191004	0.194863	0.18135	0.196175	0.198612	0.200723	0.20174	0.220725	0.226424	0.18527	0.149366	0.199982	0.198034
0.189603	0.135504	0.193647	0.192346	0.195214	0.176148	0.208233	0.190572	0.18783	0.181884	0.15432	0.0852899	0.151535	0.0971301	0.202666	0.155778	0.175748	0.141722	0.203028	0.210299	0.214087	0.22571	0.214141	0.214777	0.219007	0.219442	0.182813	0.171417	0.19114	0.186624	0.197657	0.177028	0.206069	0.208168	0.210362	0.204205	0.21788	0.209142	0.195618	0.13947	0.211289	0.198523
0.192253	0.142026	0.1896	0.189658	0.196329	0.177883	0.205981	0.183873	0.206256	0.17799	0.167168	0.0860585	0.167872	0.0987211	0.200818	0.163997	0.161222	0.144565	0.214289	0.198408	0.217093	0.216178	0.205384	0.211309	0.227087	0.219787	0.194038	0.172681	0.191563	0.195984	0.202882	0.179763	0.209138	0.202486	0.217852	0.193022	0.224194	0.218509	0.1904	0.153754	0.207549	0.202591
0.187151	0.126338	0.188125	0.195417	0.195701	0.176804	0.198308	0.17557	0.199374	0.190517	0.162065	0.076229	0.158946	0.0939312	0.190616	0.158387	0.162565	0.150071	0.206684	0.207671	0.210808	0.212285	0.212221	0.212198	0.215189	0.226211	0.194785	0.171184	0.185823	0.184525	0.200296	0.182207	0.200442	0.197319	0.209829	0.197819	0.218393	0.211123	0.186032	0.141034	0.207482	0.201931
0.198149	0.138651	0.19074	0.183641	0.193979	0.169706	0.208593	0.178519	0.199875	0.182666	0.167212	0.0810708	0.164738	0.0927597	0.196047	0.172956	0.177337	0.154873	0.204735	0.218824	0.213091	0.226901	0.20405	0.20796	0.221773	0.220959	0.191815	0.172062	0.188938	0.176504	0.199954	0.185278	0.201078	0.202332	0.206918	0.205104	0.220082	0.221382	0.192394	0.142709	0.202948	0.195072
0.193667	0.136821	0.195259	0.184767	0.189725	0.173467	0.20222	0.180308	0.201099	0.190303	0.168977	0.0739628	0.159995	0.0955094	0.195996	0.154793	0.171895	0.158153	0.214987	0.217157	0.209504	0.214746	0.202923	0.2178	0.218318	0.219461	0.203686	0.177169	0.19354	0.19071	0.204614	0.184436	0.216406	0.202657	0.211907	0.189634	0.205861	0.210651	0.181221	0.139527	0.207596	0.200177
0.194977	0.144501	0.200809	0.195351	0.194111	0.177634	0.209869	0.185384	0.200474	0.188071	0.158194	0.0730431	0.165295	0.0921653	0.196333	0.170544	0.183212	0.162784	0.20108	0.198763	0.209417	0.228464	0.21255	0.212813	0.222967	0.215522	0.20486	0.170428	0.194323	0.190731	0.185983	0.189834	0.200608	0.199831	0.201146	0.1926	0.223871	0.205597	0.192283	0.140121	0.199472	0.207792
0.186834	0.136086	0.19359	0.19377	0.193868	0.174185	0.217712	0.181463	0.193393	0.175301	0.15502	0.0722712	0.167215	0.10506	0.185803	0.162053	0.171114	0.144742	0.209503	0.210408	0.203694	0.213767	0.219032	0.215885	0.22455	0.21878	0.194203	0.167641	0.192637	0.194573	0.192623	0.193091	0.200144	0.200861	0.210297	0.197805	0.217978	0.22871	0.189596	0.137546	0.201435	0.200112
0.193244	0.136598	0.196805	0.201399	0.181627	0.1691	0.203129	0.175646	0.202791	0.18715	0.168458	0.0701403	0.160113	0.0874712	0.187732	0.162314	0.17777	0.143589	0.212879	0.20414	0.206542	0.217658	0.216867	0.209465	0.228887	0.225044	0.179263	0.179527	0.192092	0.179956	0.19421	0.171359	0.211255	0.20524	0.209069	0.191652	0.221657	0.219165	0.189023	0.141987	0.213435	0.195149
0.196099	0.143649	0.194658	0.199711	0.181282	0.182635	0.201223	0.183045	0.190518	0.181777	0.161404	0.0679791	0.160026	0.0937878	0.204091	0.152264	0.164139	0.149335	0.211254	0.202933	0.218262	0.227957	0.206579	0.22501	0.226083	0.229879	0.18956	0.173831	0.194887	0.187845	0.199757	0.177173	0.200221	0.212198	0.208091	0.206611	0.216659	0.221803	0.192355	0.152574	0.211017	0.199145
0.198679	0.136067	0.187665	0.184454	0.195725	0.174618	0.195094	0.176745	0.194453	0.185997	0.163309	0.0741906	0.158652	0.0982558	0.19649	0.159547	0.15992	0.140485	0.215796	0.206293	0.21426	0.228293	0.212628	0.2105	0.222858	0.23315	0.193742	0.175508	0.190976	0.19544	0.190168	0.189553	0.203363	0.205319	0.208865	0.19727	0.225282	0.21738	0.193918	0.162038	0.203849	0.199592
0.202594	0.147384	0.189909	0.184419	0.205472	0.169426	0.207289	0.177654	0.189019	0.192741	0.160877	0.0750465	0.151097	0.0924735	0.204597	0.166766	0.173147	0.153131	0.212505	0.210584	0.213652	0.221627	0.214817	0.217332	0.221968	0.23124	0.198809	0.177429	0.193027	0.190009	0.206589	0.185518	0.206269	0.201439	0.212752	0.198825	0.221202	0.22631	0.202117	0.136784	0.197717	0.203054
0.210551	0.141306	0.195058	0.195636	0.196094	0.170685	0.204119	0.170656	0.190322	0.187565	0.158102	0.0793891	0.164252	0.0969306	0.199187	0.17505	0.172554	0.152792	0.212343	0.194678	0.216065	0.221917	0.212548	0.204968	0.223347	0.227023	0.198913	0.183914	0.192232	0.192775	0.20001	0.180191	0.213116	0.218816	0.211986	0.197829	0.218548	0.214758	0.190499	0.142188	0.209115	0.20708
0.198123	0.136291	0.191664	0.176308	0.186149	0.173725	0.207955	0.179971	0.2045	0.185096	0.164714	0.0709705	0.167358	0.0884524	0.19882	0.164237	0.170322	0.151726	0.212705	0.201346	0.211537	0.214456	0.212234	0.21881	0.224561	0.218831	0.204024	0.183146	0.191959	0.187813	0.203732	0.183804	0.201279	0.201605	0.205067	0.211041	0.227458	0.221278	0.188795	0.135286	0.210827	0.198471
0.186992	0.146472	0.19384	0.189569	0.195857	0.172186	0.212702	0.176646	0.203434	0.178518	0.161935	0.0739901	0.167871	0.0871672	0.208256	0.167604	0.170545	0.145924	0.224387	0.21025	0.218474	0.214639	0.217404	0.217219	0.221775	0.223217	0.189264	0.188942	0.19301	0.190431	0.195505	0.1871	0.206791	0.204752	0.209623	0.19424	0.216209	0.215834	0.18484	0.130636	0.211041	0.212584
0.187202	0.134872	0.198252	0.180794	0.191625	0.183228	0.218022	0.177747	0.198306	0.187795	0.153296	0.0749705	0.171988	0.0981314	0.192133	0.157273	0.17804	0.138411	0.211767	0.204998	0.224649	0.223685	0.206538	0.222396	0.216222	0.231932	0.187949	0.176722	0.187469	0.184471	0.203863	0.193842	0.200443	0.197569	0.203108	0.197007	0.219111	0.218187	0.195845	0.14235	0.209767	0.191094
0.205984	0.130881	0.188878	0.180438	0.198969	0.181343	0.20182	0.184275	0.205768	0.187749	0.159661	0.0664923	0.164125	0.0924618	0.197241	0.154886	0.171524	0.141025	0.2149	0.198321	0.209562	0.219175	0.209532	0.212154	0.223331	0.223719	0.198457	0.185778	0.189874	0.185307	0.188237	0.183131	0.203359	0.203711	0.213167	0.197344	0.227922	0.215249	0.193359	0.138959	0.225536	0.20815
0.192274	0.138178	0.187839	0.183349	0.192373	0.174699	0.208895	0.175288	0.203557	0.182054	0.155277	0.0759656	0.154783	0.0894366	0.19848	0.166032	0.164523	0.153437	0.20663	0.205796	0.217021	0.219924	0.205597	0.207872	0.219166	0.224868	0.187267	0.182803	0.187123	0.191232	0.200107	0.176044	0.201232	0.210339	0.213262	0.202199	0.227851	0.216471	0.193406	0.134668	0.206331	0.200122
0.190479	0.14438	0.185158	0.176577	0.202775	0.176024	0.209094	0.18038	0.189019	0.183433	0.173634	0.0836863	0.17097	0.0938146	0.187558	0.160722	0.167628	0.157134	0.226602	0.210474	0.204804	0.219586	0.199733	0.208501	0.232034	0.213148	0.1974	0.184076	0.186324	0.195692	0.203421	0.181641	0.206414	0.197145	0.2096	0.201912	0.227734	0.2153	0.18869	0.139791	0.198927	0.190911
0.182693	0.138785	0.192195	0.190451	0.210852	0.177933	0.21124	0.177648	0.200641	0.175422	0.153793	0.0751442	0.169788	0.0774301	0.192252	0.170583	0.165914	0.149751	0.202362	0.213242	0.211259	0.223538	0.217235	0.212096	0.232297	0.217747	0.199208	0.181621	0.195188	0.203291	0.205762	0.184988	0.21038	0.19704	0.207164	0.194784	0.221573	0.214398	0.191563	0.149639	0.206884	0.195485
0.197922	0.139065	0.186831	0.189638	0.190945	0.172719	0.211869	0.178116	0.194754	0.1802	0.167773	0.0816637	0.165129	0.101474	0.187748	0.159292	0.169038	0.142757	0.215001	0.206474	0.219183	0.216918	0.205492	0.216096	0.220688	0.223712	0.192418	0.179946	0.189426	0.19839	0.198853	0.179992	0.193577	0.208482	0.212084	0.197206	0.220266	0.221416	0.192694	0.142599	0.202575	0.208764
0.189585	0.144422	0.196492	0.187119	0.197961	0.169459	0.196355	0.176026	0.201271	0.193188	0.173255	0.0787236	0.160107	0.0990615	0.203995	0.173248	0.167536	0.14601	0.20457	0.196703	0.220183	0.227581	0.217677	0.202479	0.219229	0.230213	0.195186	0.176165	0.186314	0.182569	0.198317	0.186442	0.193209	0.197563	0.202292	0.19475	0.208938	0.223864	0.194506	0.149097	0.209537	0.195746
0.184921	0.141858	0.188304	0.188308	0.198496	0.166489	0.208855	0.179382	0.199268	0.18328	0.161694	0.0699267	0.151948	0.0982873	0.190724	0.162463	0.174117	0.155498	0.205596	0.201719	0.209264	0.215986	0.206955	0.207498	0.226964	0.224594	0.188018	0.184281	0.187854	0.198757	0.186683	0.17697	0.203616	0.199006	0.204784	0.190613	0.208734	0.220743	0.194955	0.144641	0.208986	0.203076
[truncated: 3,947 more rows]

## Sheet: Figure 3 dwMRI CI
95% confidence intervals (95% CI) for the bootstrapped Pearson r between the g-factor derived from ESEM and the g-factor predicted from individual dwMRI neuroimaging phenotypes.
[truncated: 169 more rows]

## Sheet: Figure 3 rsMRI Pearson r
Predictive performance (bootstrapped Pearson r) of machine learning models based on 10 rsMRI neuroimaging phenotypes.
[truncated: 5,001 more rows]

[truncated: 3 more sheets: Figure 3 rsMRI CI, Figure 3 sMRI Pearson r, Figure 3 sMRI CI]
