# Supplementary material for: Multimodal MRI marker of cognition explains the association between cognition and mental health in the UK Biobank
Source: eLife. 2026 May 20;14:RP108109. doi: 10.7554/eLife.108109 (PMC13189626; doi:10.7554/eLife.108109)
Supplement: Figure 4—source data 1. [file elife-108109-fig4-data1.xlsx]

## Sheet: Figure 4 Pearson r
Predictive performance (bootstraped Pearson r) of machine learning models based on neuroimaging phenotypes stacked within and across three MRI modalities.
dwMRI Stacked (RF)	rsMRI Stacked (RF)	sMRI Stacked (SVR)	All MRI Modalities Stacked (XGB)
0.265437	0.321288	0.375216	0.381871
0.259107	0.310204	0.377077	0.379577
0.268354	0.329613	0.37272	0.394586
0.263637	0.325941	0.372186	0.391088
0.255106	0.320852	0.380701	0.39616
0.249149	0.318123	0.37483	0.394632
0.264942	0.318333	0.376173	0.3972
0.256991	0.317678	0.380964	0.402589
0.255125	0.318043	0.3744	0.396433
0.256269	0.329179	0.375386	0.396134
0.262723	0.322845	0.375188	0.389777
0.263056	0.322141	0.371945	0.404163
0.255691	0.313537	0.379206	0.394466
0.257812	0.324121	0.375812	0.37857
0.256859	0.32197	0.372959	0.37994
0.257588	0.32305	0.361788	0.386738
0.262077	0.315407	0.381811	0.386628
0.26507	0.318807	0.371848	0.380934
0.263869	0.309015	0.379344	0.381783
0.257966	0.327685	0.37624	0.390438
0.265436	0.311258	0.367624	0.395246
0.26559	0.314842	0.373591	0.393593
0.263331	0.322641	0.377893	0.397165
0.270385	0.321088	0.359778	0.383402
0.269543	0.322872	0.385393	0.385674
0.260126	0.322025	0.370332	0.387838
0.258587	0.313099	0.378092	0.39491
0.256354	0.328396	0.374648	0.387542
0.265433	0.31606	0.37986	0.390557
0.257507	0.306547	0.367596	0.399949
0.260473	0.32507	0.381026	0.393684
0.267864	0.313493	0.379944	0.394585
0.265874	0.321605	0.372762	0.400378
0.266532	0.319528	0.380833	0.393841
0.260573	0.316392	0.37783	0.383712
0.253811	0.32271	0.373955	0.386199
0.263326	0.32721	0.382736	0.385733
0.264531	0.327613	0.373579	0.399664
0.26317	0.321902	0.364852	0.388932
0.269388	0.315828	0.380348	0.392125
0.267892	0.33083	0.374202	0.391582
0.256227	0.316112	0.370825	0.394866
0.263771	0.314377	0.374578	0.388673
0.263512	0.313889	0.3818	0.383792
0.25412	0.325687	0.375136	0.394793
0.266081	0.314744	0.367415	0.393361
0.263296	0.318298	0.377883	0.386172
0.261616	0.323128	0.374154	0.382578
0.255139	0.32169	0.378617	0.38633
0.265622	0.321971	0.378171	0.397116
0.259459	0.322926	0.377087	0.396617
0.261324	0.322854	0.389828	0.39673
0.261792	0.324487	0.376664	0.397814
0.26194	0.320048	0.37785	0.401463
0.255776	0.321459	0.37827	0.388631
0.26586	0.315227	0.377059	0.389443
0.273226	0.320521	0.382202	0.389837
0.267141	0.316746	0.372203	0.38711
0.269211	0.311957	0.384547	0.38736
0.261236	0.321172	0.371524	0.384454
0.269689	0.323162	0.37098	0.401135
0.264598	0.3235	0.37438	0.395633
0.262345	0.306749	0.374927	0.386094
0.256049	0.333325	0.366686	0.388964
0.260631	0.313177	0.37456	0.391388
0.263894	0.317454	0.365996	0.383332
0.269906	0.307662	0.378813	0.392058
0.261731	0.319393	0.375143	0.392208
0.262384	0.326687	0.370798	0.383718
0.258791	0.321228	0.37068	0.392019
0.265494	0.320094	0.368624	0.382198
0.273005	0.319885	0.375857	0.380398
0.262667	0.319679	0.366243	0.384011
0.262533	0.327575	0.388512	0.387865
0.278105	0.316134	0.381944	0.390549
0.264711	0.316558	0.383694	0.403735
0.263279	0.315843	0.375999	0.388102
0.265496	0.328506	0.382857	0.385747
0.263482	0.317223	0.380378	0.398419
0.262029	0.325654	0.375112	0.390726
0.256599	0.307784	0.371917	0.390404
0.265551	0.324021	0.373159	0.392133
0.259081	0.317884	0.374733	0.386801
0.26297	0.319809	0.382607	0.390785
0.260918	0.315981	0.3797	0.385909
0.251285	0.314118	0.384715	0.395313
0.267439	0.309998	0.372949	0.384079
0.259202	0.315703	0.374385	0.398406
0.254313	0.319432	0.37827	0.389482
0.266344	0.312137	0.36698	0.387999
0.262527	0.311784	0.374416	0.391389
0.26325	0.323166	0.365658	0.385157
0.263377	0.324555	0.365007	0.389789
0.267119	0.318461	0.367417	0.385379
0.262433	0.31861	0.376983	0.387873
0.268938	0.323425	0.3881	0.388717
0.262496	0.307509	0.372019	0.401343
0.255732	0.322451	0.372357	0.401782
0.266298	0.327111	0.383454	0.393936
0.255497	0.319163	0.362878	0.387427
0.257673	0.321563	0.381444	0.388784
0.261014	0.309342	0.379874	0.399008
0.273044	0.321153	0.379435	0.384037
0.256052	0.327694	0.368862	0.388378
0.265632	0.310458	0.377121	0.393402
0.260342	0.321695	0.373578	0.394662
0.259368	0.314019	0.380448	0.393762
0.265597	0.318143	0.367906	0.406643
0.266238	0.312811	0.382101	0.392972
0.265381	0.322365	0.37521	0.401473
0.263819	0.313998	0.363947	0.389295
0.263338	0.318047	0.37279	0.38708
0.259759	0.324174	0.364389	0.390836
0.264609	0.326418	0.382629	0.386516
0.26721	0.319282	0.39113	0.398384
0.258302	0.320797	0.377031	0.398212
0.253528	0.321205	0.360552	0.390309
0.264282	0.324091	0.377398	0.392833
0.259155	0.318434	0.377158	0.385467
0.262992	0.329813	0.37817	0.384417
0.264064	0.320541	0.371798	0.39014
0.255471	0.325938	0.377026	0.395977
0.261797	0.315251	0.379853	0.388691
0.261666	0.316822	0.373584	0.393237
0.270133	0.313847	0.367775	0.38406
0.26595	0.321416	0.369322	0.388064
0.25935	0.313887	0.372558	0.388552
0.263021	0.324342	0.385009	0.391473
0.250002	0.331002	0.368199	0.391126
0.259755	0.313921	0.379293	0.394625
0.267004	0.317333	0.377104	0.38973
0.26264	0.327702	0.373603	0.391975
0.264438	0.313495	0.376799	0.387012
0.261836	0.326422	0.372622	0.390749
0.264387	0.313926	0.380742	0.385833
0.263697	0.320417	0.374919	0.391061
0.268079	0.31614	0.381447	0.385671
0.271461	0.325068	0.359027	0.37988
0.260214	0.332729	0.374717	0.395853
0.26831	0.308867	0.378293	0.395898
0.263996	0.31633	0.377218	0.395574
0.265768	0.316344	0.368195	0.40198
0.264377	0.307792	0.37758	0.383024
0.266639	0.326244	0.374013	0.383509
0.254093	0.321479	0.379243	0.392006
0.256145	0.323117	0.387266	0.39185
0.258093	0.315783	0.374591	0.385868
0.261169	0.323627	0.383202	0.395874
0.267146	0.315939	0.386308	0.396552
0.265625	0.321051	0.374697	0.396482
0.267614	0.312205	0.367774	0.392575
0.265276	0.326934	0.391194	0.393742
0.247549	0.317805	0.375029	0.394997
0.26508	0.326863	0.372441	0.388898
0.260901	0.325347	0.36965	0.399946
0.265315	0.311006	0.385909	0.382893
0.27003	0.320089	0.378347	0.392096
0.262076	0.324729	0.375397	0.385137
0.264954	0.317924	0.37101	0.390242
0.251809	0.313255	0.371164	0.391093
0.252286	0.3104	0.379441	0.395055
0.257529	0.320058	0.374032	0.400017
0.271016	0.32725	0.379242	0.389573
0.25509	0.306088	0.370381	0.395059
0.263973	0.326472	0.379969	0.395153
0.273299	0.316135	0.374989	0.390033
0.26096	0.316256	0.376021	0.391106
0.263615	0.315183	0.362758	0.402327
0.26592	0.334428	0.378707	0.390535
0.249433	0.327761	0.375951	0.38811
0.258625	0.324963	0.388531	0.386972
0.257131	0.321143	0.37928	0.395521
0.253721	0.319511	0.383465	0.385381
0.257845	0.32159	0.381372	0.384358
0.26241	0.322083	0.384824	0.38071
0.266155	0.32229	0.37405	0.385843
0.260856	0.324146	0.369437	0.392691
0.261184	0.325096	0.375617	0.39447
0.265	0.317622	0.370529	0.390989
0.275303	0.317125	0.380504	0.381222
0.264835	0.315487	0.382574	0.400216
0.262743	0.318518	0.369831	0.401375
0.253472	0.322859	0.376538	0.389505
0.266461	0.322461	0.376157	0.382999
0.259306	0.318946	0.375513	0.385669
0.281432	0.312721	0.366668	0.391466
0.259487	0.322036	0.373176	0.387533
0.267896	0.315418	0.367447	0.385341
0.257133	0.320511	0.381111	0.388423
0.257901	0.320232	0.370832	0.396634
0.264549	0.332052	0.381241	0.387149
0.255097	0.317051	0.381024	0.397471
0.257924	0.311819	0.37934	0.391711
0.262299	0.318329	0.382878	0.391934
0.270155	0.326059	0.366552	0.388532
0.268775	0.313583	0.380262	0.391552
0.26172	0.325636	0.381279	0.400781
0.259525	0.318254	0.372772	0.398844
0.270791	0.32064	0.370484	0.379143
0.258663	0.314252	0.377563	0.395549
0.256755	0.319603	0.376328	0.393569
0.259521	0.322301	0.375055	0.37549
0.263897	0.322816	0.384301	0.387698
0.266402	0.33303	0.379817	0.397698
0.261646	0.331413	0.37571	0.380773
0.259999	0.321766	0.381594	0.390804
0.263145	0.314287	0.376655	0.380234
0.253782	0.312755	0.3853	0.391551
0.267247	0.321747	0.371995	0.389194
0.265032	0.31378	0.369482	0.387559
0.263454	0.31772	0.378355	0.374054
0.253637	0.317991	0.379962	0.375092
0.270374	0.330519	0.365302	0.395132
0.259439	0.325208	0.385282	0.383109
0.259676	0.328679	0.373075	0.387427
0.255716	0.325822	0.371712	0.387134
0.25742	0.320935	0.369437	0.390257
0.255635	0.325156	0.370743	0.390091
0.254081	0.31506	0.378079	0.395973
0.261797	0.330565	0.369541	0.398312
0.266412	0.319764	0.382798	0.394333
0.25281	0.322089	0.373952	0.392012
0.269319	0.330742	0.371219	0.396528
0.258197	0.32081	0.370461	0.382972
0.26699	0.324879	0.381614	0.38996
0.256882	0.31847	0.3738	0.383353
0.266353	0.320878	0.378242	0.389426
0.254538	0.321377	0.383666	0.394893
0.258363	0.332571	0.375773	0.396811
0.26617	0.317349	0.380987	0.380309
0.263313	0.320921	0.381156	0.395371
0.263483	0.311961	0.372315	0.387889
0.274943	0.321497	0.376894	0.389849
0.262399	0.324578	0.370556	0.386705
0.25591	0.312958	0.377133	0.393042
0.259417	0.318033	0.372738	0.387263
0.255509	0.329662	0.37527	0.397217
0.269363	0.314236	0.37934	0.380365
0.266111	0.316011	0.376707	0.385013
0.264895	0.317887	0.375388	0.393636
0.262489	0.315832	0.365074	0.391396
0.271233	0.310881	0.377116	0.404921
0.261951	0.316845	0.366012	0.389832
0.259	0.324512	0.375856	0.380597
0.259872	0.321936	0.372005	0.389806
0.25704	0.311745	0.372956	0.385327
0.251539	0.329619	0.376036	0.385644
0.270702	0.316347	0.371398	0.386982
0.257403	0.330091	0.377563	0.381747
0.256413	0.330706	0.374305	0.387121
0.257037	0.314681	0.37035	0.381757
0.262088	0.322201	0.379818	0.388761
0.264513	0.318231	0.382726	0.387157
0.248402	0.319772	0.378081	0.392199
0.263676	0.321449	0.378999	0.399594
0.275361	0.322594	0.378287	0.39167
0.256864	0.323159	0.378437	0.394097
0.255698	0.321751	0.373664	0.39769
0.257154	0.314732	0.378717	0.387527
0.263988	0.320922	0.372607	0.39391
0.264819	0.322947	0.374432	0.389446
0.261938	0.32625	0.373644	0.388816
0.252063	0.330226	0.372125	0.390275
0.260828	0.314395	0.383514	0.399383
0.258957	0.31792	0.374466	0.387054
0.251639	0.325788	0.372111	0.384013
0.268736	0.326927	0.379255	0.380043
0.263133	0.323274	0.366286	0.392043
0.263038	0.314904	0.372285	0.384415
0.261199	0.318337	0.371411	0.392458
0.257918	0.321256	0.36508	0.387631
0.263336	0.317739	0.385246	0.394912
0.25766	0.32558	0.369005	0.382542
0.261489	0.31777	0.374968	0.397045
0.269337	0.32257	0.368252	0.385678
0.268296	0.316717	0.374265	0.382963
0.255808	0.320093	0.376872	0.38377
0.263513	0.324501	0.375891	0.386845
0.268304	0.32307	0.366139	0.397056
0.263599	0.3252	0.372894	0.380382
0.266603	0.31872	0.380534	0.393994
0.261321	0.310864	0.373599	0.381799
0.260954	0.313097	0.379241	0.383986
0.262181	0.320128	0.371906	0.393374
0.265772	0.330815	0.377709	0.393538
0.265156	0.323529	0.375547	0.38071
0.261621	0.315044	0.369711	0.399451
0.268316	0.318147	0.372104	0.392012
0.261809	0.323274	0.387749	0.381926
0.267807	0.328361	0.379959	0.383993
0.255786	0.320806	0.384776	0.395894
0.265044	0.329052	0.366703	0.3952
0.261113	0.314678	0.380185	0.391774
0.26643	0.321469	0.371168	0.392991
0.256183	0.318802	0.36931	0.398317
0.274417	0.325608	0.369561	0.391545
0.267589	0.327195	0.378024	0.388366
0.267369	0.324648	0.374121	0.389743
0.267368	0.319063	0.380801	0.393267
0.255305	0.312028	0.3808	0.396258
0.254398	0.318125	0.379429	0.392225
0.255869	0.319079	0.368635	0.385088
0.259108	0.32534	0.376098	0.390361
0.265729	0.326655	0.374392	0.386997
0.26769	0.323202	0.374134	0.399079
0.2561	0.313752	0.380047	0.398364
0.264999	0.321282	0.374416	0.402214
0.258203	0.306373	0.36758	0.385635
0.262926	0.317465	0.374576	0.386004
0.266087	0.324873	0.384834	0.38511
0.26391	0.329742	0.371562	0.389417
0.262082	0.314869	0.375269	0.38761
0.263491	0.316923	0.383548	0.392143
0.263663	0.324854	0.376113	0.399103
0.274133	0.322674	0.380135	0.398542
0.257987	0.318763	0.37659	0.390388
0.252131	0.323058	0.374771	0.386468
0.260769	0.321128	0.372153	0.391522
0.261469	0.324093	0.363361	0.387266
0.25693	0.319965	0.382845	0.388134
0.25476	0.312588	0.370645	0.385223
0.262404	0.321008	0.371687	0.389288
0.253549	0.320613	0.371565	0.393992
0.262242	0.318992	0.375496	0.392467
0.255942	0.309782	0.36751	0.393139
0.252202	0.316355	0.375196	0.394608
0.261272	0.321385	0.377257	0.389563
0.260323	0.314859	0.371816	0.388463
0.267717	0.314527	0.369832	0.396988
0.263937	0.310333	0.366176	0.387229
0.261209	0.316052	0.37585	0.390802
0.268706	0.32129	0.368855	0.394479
0.260761	0.315397	0.372498	0.392946
0.260756	0.314694	0.382983	0.385255
0.26562	0.330363	0.37782	0.386764
0.260475	0.302774	0.381605	0.381939
0.261702	0.319553	0.375329	0.388289
0.256257	0.305342	0.376727	0.380019
0.255465	0.326578	0.379661	0.39413
0.261419	0.328542	0.380678	0.399499
0.260383	0.319174	0.379318	0.387037
0.254947	0.312923	0.383512	0.393703
0.262694	0.313611	0.381149	0.390321
0.271103	0.31147	0.382777	0.390886
0.265627	0.319809	0.367493	0.38674
0.260679	0.310943	0.38049	0.399603
0.249753	0.31905	0.383077	0.387532
0.261099	0.317988	0.389304	0.396293
0.260093	0.306379	0.369317	0.382002
0.260978	0.316244	0.374067	0.397385
0.254401	0.321406	0.375685	0.382875
0.268353	0.312151	0.371001	0.387051
0.254414	0.325328	0.37497	0.390975
0.26366	0.320236	0.375785	0.391154
0.267506	0.315276	0.375347	0.390483
0.267614	0.316597	0.379047	0.373711
0.264562	0.331211	0.379955	0.389358
0.262181	0.315178	0.366902	0.388997
0.258887	0.332784	0.370158	0.384103
0.262815	0.336908	0.371067	0.391947
0.258804	0.321071	0.37948	0.384119
0.26385	0.319951	0.371647	0.397308
0.25912	0.312172	0.376099	0.398573
0.268311	0.31052	0.3819	0.394132
0.251656	0.315724	0.369703	0.385844
0.262887	0.315634	0.379808	0.389929
0.26138	0.322523	0.381871	0.391091
0.261874	0.317087	0.376999	0.39873
0.256203	0.318119	0.378652	0.392925
0.265769	0.327324	0.390212	0.386838
0.255471	0.320561	0.377456	0.393239
0.258268	0.32019	0.386095	0.398457
0.264262	0.317425	0.382704	0.387492
0.268058	0.318833	0.375557	0.393967
0.265002	0.312976	0.374314	0.385504
0.263447	0.319848	0.368103	0.391743
0.251449	0.323878	0.372892	0.389229
0.265695	0.330159	0.367588	0.387367
0.256462	0.321379	0.373831	0.395771
0.254649	0.320236	0.377074	0.389628
0.26545	0.322704	0.381524	0.398538
0.258949	0.311725	0.375378	0.379245
0.258798	0.330165	0.370504	0.393248
0.259934	0.322369	0.366675	0.383304
0.25996	0.325767	0.374835	0.383909
0.261977	0.316047	0.372345	0.38531
0.267286	0.325666	0.375452	0.391974
0.267362	0.311184	0.374067	0.395104
0.259219	0.320697	0.372578	0.390529
0.258107	0.326628	0.37551	0.392372
0.262426	0.324206	0.374939	0.394154
0.264956	0.330431	0.363811	0.384871
0.257298	0.323679	0.375077	0.391404
0.264719	0.314176	0.378117	0.393699
0.258985	0.309427	0.388909	0.398632
0.270458	0.321266	0.379492	0.393426
0.262554	0.320508	0.368899	0.389529
0.257543	0.317558	0.37366	0.396323
0.259314	0.321034	0.37464	0.400076
0.259246	0.318716	0.384183	0.391891
0.257452	0.320824	0.368434	0.384336
0.261063	0.314584	0.376613	0.393079
0.253741	0.306521	0.381291	0.376184
0.26428	0.320991	0.370812	0.393913
0.257676	0.318262	0.369078	0.386681
0.262688	0.32255	0.375928	0.392685
0.264129	0.327852	0.371357	0.397492
0.26172	0.309682	0.378763	0.394266
0.261783	0.317264	0.383908	0.385322
0.273408	0.323227	0.392694	0.388421
0.264141	0.320045	0.36798	0.386021
0.263482	0.326878	0.386503	0.381892
0.27249	0.312792	0.377521	0.397933
0.263382	0.327561	0.381882	0.389151
0.25896	0.325247	0.377049	0.388441
0.26678	0.330202	0.385549	0.390328
0.257897	0.319237	0.36608	0.399104
0.254544	0.311749	0.376208	0.383501
0.256088	0.319617	0.370604	0.391039
0.264986	0.308421	0.385444	0.397435
0.258997	0.317046	0.375824	0.384547
0.261864	0.320125	0.372729	0.385134
0.266335	0.318259	0.378268	0.394204
0.258119	0.321091	0.376138	0.396033
0.263844	0.317834	0.375584	0.397761
0.265079	0.319632	0.376978	0.394343
0.259271	0.319391	0.380089	0.387778
0.255403	0.334567	0.388688	0.393108
0.259697	0.314084	0.378539	0.398136
0.255864	0.329375	0.375321	0.389229
0.260758	0.324431	0.383642	0.389561
0.262431	0.308563	0.3801	0.387435
0.268102	0.316505	0.384386	0.391529
0.254598	0.313369	0.377564	0.389867
0.264074	0.322455	0.380562	0.390011
0.2522	0.31665	0.380747	0.384828
0.257698	0.31761	0.376588	0.390785
0.271739	0.32497	0.373071	0.391713
0.249339	0.319539	0.374394	0.385634
0.262416	0.319054	0.376605	0.391995
0.260123	0.319172	0.373977	0.379893
0.257825	0.319768	0.374691	0.383566
0.256833	0.325353	0.367296	0.388872
0.260286	0.31332	0.369545	0.385576
0.261968	0.312916	0.379729	0.372081
0.250885	0.322339	0.369831	0.392542
0.254226	0.315735	0.367293	0.386773
0.267257	0.316599	0.37204	0.392543
0.257657	0.321786	0.381638	0.397423
0.258049	0.330661	0.382983	0.397432
0.250002	0.316902	0.374749	0.397469
0.26057	0.324582	0.377913	0.386154
0.262257	0.322013	0.369764	0.396177
0.263458	0.317461	0.377166	0.388929
0.265721	0.321654	0.374412	0.388823
0.263505	0.316733	0.377236	0.390041
0.25281	0.323377	0.379165	0.387141
0.260931	0.321488	0.376475	0.394704
0.251728	0.318064	0.375591	0.390984
0.260777	0.315611	0.37272	0.389049
0.270749	0.308317	0.379711	0.393877
0.260288	0.320316	0.378815	0.382333
0.266443	0.325891	0.383113	0.388618
0.27068	0.315083	0.381176	0.395504
0.272872	0.329242	0.37828	0.389758
0.258284	0.325399	0.36217	0.389003
0.263655	0.319905	0.377912	0.38786
0.265295	0.320846	0.375333	0.395021
0.26221	0.317948	0.373888	0.403207
0.272191	0.314426	0.371111	0.397152
0.263077	0.32233	0.377046	0.390649
0.269961	0.324652	0.375451	0.391885
0.274345	0.330225	0.37823	0.382914
0.262498	0.313825	0.380408	0.391166
0.26098	0.323726	0.374377	0.393591
0.264165	0.314358	0.375394	0.388601
0.255289	0.316488	0.378077	0.390957
0.262393	0.334659	0.380109	0.394606
0.260642	0.309849	0.369508	0.38678
0.270515	0.313245	0.376504	0.387836
0.261026	0.319053	0.37735	0.37914
0.267132	0.329967	0.380728	0.389168
0.26814	0.31275	0.376351	0.383748
0.271843	0.324755	0.366502	0.386978
0.257335	0.333907	0.37903	0.392393
0.25472	0.309883	0.37035	0.389077
0.261417	0.32707	0.382873	0.391343
0.265836	0.325157	0.379479	0.391241
0.262794	0.32626	0.370378	0.392063
0.256486	0.325853	0.368251	0.384777
0.262078	0.321454	0.379592	0.394304
0.278965	0.326019	0.373845	0.3841
0.253328	0.311769	0.371343	0.382688
0.264136	0.32038	0.378644	0.399655
0.263116	0.320673	0.380866	0.386535
0.267747	0.320732	0.376011	0.389615
0.255789	0.32038	0.376583	0.384603
0.262135	0.315818	0.378862	0.385552
0.264494	0.314969	0.367002	0.395931
0.260608	0.323499	0.382496	0.388372
0.264796	0.329412	0.381714	0.389196
0.269952	0.325525	0.377334	0.390186
0.257892	0.320998	0.381827	0.394387
0.261375	0.319314	0.379983	0.392432
0.268619	0.317591	0.377327	0.402163
0.261128	0.335108	0.361403	0.389881
0.256524	0.318399	0.379569	0.401066
0.261191	0.319623	0.371488	0.400014
0.265839	0.330683	0.377113	0.392835
0.260556	0.315479	0.375647	0.395141
0.254716	0.316476	0.38303	0.382039
0.264509	0.315959	0.367471	0.394162
0.257244	0.316968	0.379626	0.393316
0.257661	0.333802	0.383018	0.385235
0.273141	0.327089	0.380158	0.38722
0.262061	0.327896	0.37759	0.380459
0.261898	0.326668	0.377245	0.380637
0.263132	0.31834	0.374695	0.390315
0.261734	0.326678	0.366383	0.403483
0.253706	0.327798	0.378404	0.389238
0.276344	0.320186	0.373021	0.380795
0.261679	0.313609	0.376674	0.392618
0.267891	0.321861	0.382775	0.395129
0.270978	0.321919	0.373463	0.391445
0.259708	0.321351	0.371393	0.392357
0.25839	0.323844	0.377515	0.395695
0.258791	0.330799	0.379784	0.392515
0.280298	0.314656	0.376376	0.393448
0.260625	0.320769	0.384753	0.398194
0.260245	0.309748	0.379132	0.390082
0.260107	0.317865	0.375352	0.398652
0.266095	0.31573	0.374022	0.379855
0.265686	0.3284	0.370415	0.390426
0.253528	0.327142	0.376429	0.391211
0.269537	0.324154	0.375472	0.389526
0.263428	0.325199	0.367471	0.385618
0.252739	0.31882	0.373139	0.387204
0.269768	0.326565	0.368059	0.394329
0.25738	0.321161	0.372817	0.385144
0.258122	0.320293	0.38179	0.392248
0.264541	0.326353	0.380519	0.386239
0.261176	0.318692	0.37565	0.384594
0.259786	0.327616	0.369191	0.38824
0.257915	0.317705	0.36581	0.391131
0.255566	0.323856	0.366376	0.389254
0.261171	0.319196	0.384517	0.392445
0.258601	0.315623	0.371612	0.385668
0.25926	0.317645	0.373975	0.390821
0.268925	0.309928	0.38502	0.392849
0.255689	0.314322	0.379471	0.389481
0.261187	0.31944	0.368234	0.381805
0.258061	0.309269	0.372853	0.385117
0.256428	0.32304	0.374273	0.387217
0.267131	0.324137	0.381136	0.388813
0.260528	0.322115	0.383139	0.392319
0.25555	0.3181	0.372335	0.394772
0.258304	0.325699	0.37002	0.393235
0.261847	0.319902	0.370054	0.381315
0.255893	0.325961	0.372378	0.38458
0.273839	0.3253	0.382421	0.390875
0.263786	0.313725	0.374606	0.384859
0.263212	0.320342	0.385386	0.393708
0.267266	0.326408	0.372498	0.384796
0.271192	0.316815	0.381464	0.387739
0.263077	0.314636	0.378958	0.396162
0.264896	0.325315	0.380978	0.39446
0.263417	0.324688	0.37141	0.390586
0.25587	0.327426	0.372983	0.381927
0.260531	0.322318	0.381005	0.387728
0.257741	0.320609	0.375932	0.393954
0.258106	0.320079	0.375299	0.387986
0.257963	0.322388	0.381676	0.38044
0.250074	0.317369	0.373323	0.383961
0.257082	0.315998	0.377735	0.388442
0.255046	0.315066	0.376068	0.384913
0.257933	0.3181	0.377024	0.393989
0.263372	0.309882	0.371848	0.386889
0.266507	0.317675	0.371047	0.38158
0.262558	0.311543	0.371869	0.383984
0.266724	0.318234	0.375511	0.389767
0.262428	0.312706	0.381446	0.391227
0.260069	0.317775	0.378556	0.384535
0.260246	0.326924	0.366524	0.38709
0.26965	0.316145	0.380585	0.397465
0.270169	0.312795	0.374209	0.392314
0.267133	0.316588	0.384656	0.391411
0.26398	0.322977	0.375571	0.403185
0.264544	0.320976	0.376869	0.39417
0.268101	0.318756	0.375498	0.390854
0.264599	0.323993	0.3711	0.40066
0.262842	0.321681	0.385488	0.385884
0.26288	0.325421	0.383384	0.407726
0.277203	0.327798	0.388485	0.387418
0.259642	0.32417	0.371344	0.386459
0.257165	0.314291	0.389344	0.385991
0.260452	0.322033	0.370262	0.393484
0.262983	0.305293	0.375705	0.401525
0.258124	0.324412	0.388073	0.396067
0.260632	0.31242	0.37928	0.398189
0.263526	0.320224	0.379292	0.391354
0.261429	0.320336	0.381017	0.392389
0.258712	0.322029	0.381072	0.383872
0.254207	0.318668	0.37161	0.388301
0.267978	0.316869	0.364682	0.397782
0.262733	0.308605	0.384992	0.397537
0.259417	0.313195	0.368982	0.389139
0.251171	0.322092	0.371031	0.398008
0.26984	0.314053	0.375213	0.387668
0.266005	0.323556	0.380161	0.391067
0.265047	0.316658	0.380617	0.385009
0.262469	0.309783	0.370694	0.388156
0.262188	0.33336	0.379545	0.39254
0.255807	0.320177	0.380789	0.385631
0.258535	0.315644	0.36031	0.393369
0.264644	0.32185	0.363462	0.388556
0.264301	0.318856	0.378234	0.3916
0.264095	0.321261	0.376058	0.38927
0.259079	0.321187	0.375389	0.386087
0.266625	0.327841	0.371447	0.385018
0.257206	0.317233	0.376536	0.390853
0.270687	0.318635	0.388523	0.391757
0.260346	0.31685	0.377174	0.394391
0.25986	0.327387	0.37646	0.389622
0.267192	0.322693	0.378317	0.389596
0.271662	0.322262	0.367816	0.374529
0.248989	0.323155	0.374727	0.390507
0.26669	0.315017	0.383691	0.38718
0.27017	0.322118	0.381689	0.393045
0.264086	0.317843	0.378622	0.392165
0.263693	0.318627	0.383076	0.391622
0.257448	0.317022	0.375523	0.389451
0.259763	0.32002	0.376975	0.390028
0.259145	0.312709	0.38689	0.390946
0.257808	0.323245	0.373865	0.396
0.269767	0.320333	0.378228	0.396633
0.256082	0.314128	0.376	0.3875
0.260767	0.305088	0.377502	0.392631
0.259276	0.329903	0.375967	0.387835
0.263815	0.323823	0.385184	0.383524
0.264445	0.322966	0.373698	0.393785
0.257263	0.321973	0.372585	0.392087
0.262014	0.316366	0.366337	0.393155
0.2691	0.316298	0.383352	0.387237
0.266637	0.321782	0.371288	0.394768
0.264767	0.310206	0.374351	0.393356
0.25886	0.32553	0.370629	0.397806
0.263875	0.316849	0.381985	0.394974
0.272808	0.314918	0.375445	0.393043
0.254062	0.323626	0.370459	0.402456
0.260086	0.325236	0.375238	0.395448
0.26904	0.308342	0.382023	0.385433
0.262946	0.32163	0.358147	0.396804
0.268878	0.3275	0.378812	0.391096
0.254973	0.329165	0.371928	0.387195
0.269576	0.315096	0.366966	0.388515
0.257078	0.312268	0.371338	0.389503
0.267519	0.314843	0.37448	0.398482
0.269738	0.322514	0.390439	0.387998
0.264176	0.323833	0.379869	0.384892
0.255653	0.31787	0.376575	0.393077
0.263747	0.319051	0.363514	0.384623
0.259503	0.321106	0.374734	0.381039
0.261316	0.32803	0.375789	0.392519
0.26037	0.322918	0.376711	0.382216
0.268801	0.31674	0.379679	0.384219
0.25977	0.323492	0.376095	0.390196
0.273218	0.320693	0.373591	0.388429
0.26075	0.327553	0.368497	0.391651
0.264929	0.31761	0.377608	0.391838
0.261107	0.31478	0.36983	0.396336
0.255348	0.324477	0.374417	0.395033
0.262007	0.322662	0.376815	0.39565
0.254251	0.312145	0.376755	0.384563
0.255736	0.325055	0.383992	0.39773
0.261483	0.315243	0.36698	0.400484
0.253756	0.315577	0.381297	0.39189
0.267378	0.321356	0.367098	0.385718
0.256821	0.320065	0.377381	0.386205
0.264031	0.320597	0.379139	0.383152
0.257747	0.324057	0.386259	0.398721
0.263781	0.322914	0.377459	0.401014
0.260781	0.323945	0.384448	0.394899
0.262937	0.316078	0.378258	0.392212
0.269791	0.324915	0.378321	0.3867
0.26717	0.314172	0.37074	0.388387
0.262147	0.321899	0.368247	0.391203
0.267131	0.321427	0.375886	0.399357
0.265993	0.316303	0.37959	0.398106
0.269703	0.317439	0.372427	0.386536
0.256291	0.319237	0.383891	0.397975
0.26396	0.314651	0.375636	0.392278
0.254338	0.315723	0.381263	0.381783
0.271968	0.312787	0.37131	0.377654
0.258302	0.308461	0.382881	0.390743
0.255252	0.324692	0.379325	0.395829
0.270726	0.315989	0.371758	0.392728
0.262917	0.316089	0.369755	0.388846
0.263539	0.323391	0.376275	0.389104
0.261637	0.331158	0.384019	0.390255
0.266525	0.3064	0.369318	0.382856
0.258702	0.313041	0.379633	0.388304
0.263699	0.312155	0.379611	0.392292
0.259247	0.320751	0.370515	0.390895
0.26571	0.32098	0.37403	0.393756
0.261728	0.31038	0.379918	0.398065
0.255438	0.318546	0.370334	0.396516
0.271882	0.324495	0.374393	0.391184
0.266346	0.331859	0.374697	0.39953
0.263516	0.308683	0.368347	0.396595
0.2643	0.315006	0.386614	0.392682
0.260313	0.325807	0.372466	0.387354
0.258498	0.320912	0.371856	0.394293
0.264767	0.312205	0.378156	0.384952
0.269085	0.320499	0.376312	0.392345
0.263641	0.31692	0.386046	0.382758
0.25712	0.323483	0.374382	0.386986
0.256427	0.329043	0.375276	0.380707
0.257332	0.323264	0.387003	0.385079
0.24813	0.315349	0.375343	0.381232
0.255449	0.313636	0.380345	0.39629
0.266143	0.314291	0.378126	0.395332
0.250768	0.315009	0.374877	0.39124
0.262971	0.325721	0.380154	0.390113
0.262306	0.31411	0.374775	0.391532
0.265166	0.327177	0.376142	0.39023
0.261393	0.31799	0.372897	0.384961
0.268307	0.315882	0.386019	0.379602
0.257462	0.312711	0.375541	0.383313
0.261335	0.320683	0.384876	0.390951
0.253722	0.32676	0.381823	0.383826
0.263311	0.319325	0.373488	0.387399
0.269249	0.318285	0.370834	0.393493
0.258282	0.324653	0.376171	0.381374
0.25227	0.317775	0.381903	0.391456
0.260262	0.321064	0.385638	0.39383
0.263702	0.321921	0.371351	0.390289
0.257669	0.311914	0.370906	0.393981
0.265722	0.313938	0.381689	0.392899
0.262512	0.32819	0.369893	0.391764
0.273725	0.327423	0.376994	0.387416
0.257962	0.323919	0.372643	0.39565
0.251148	0.324975	0.375781	0.384456
0.26572	0.311924	0.379002	0.38329
0.264761	0.309804	0.378792	0.395892
0.261851	0.315118	0.376546	0.387068
0.258361	0.32367	0.383877	0.39329
0.25555	0.323039	0.373018	0.404864
0.25522	0.314593	0.378562	0.391557
0.256097	0.314452	0.372623	0.380486
0.253261	0.320833	0.373304	0.391503
0.261591	0.33096	0.387983	0.393563
0.264075	0.320049	0.371429	0.391539
0.262091	0.311366	0.370796	0.387567
0.273748	0.324773	0.371517	0.395456
0.259662	0.313628	0.379895	0.389755
0.2531	0.313466	0.381228	0.395718
0.2641	0.322277	0.373109	0.397963
0.274564	0.317406	0.380587	0.388214
0.265162	0.320825	0.385801	0.393716
0.260419	0.312588	0.37968	0.389658
0.261133	0.316969	0.378058	0.393632
0.265839	0.316243	0.375361	0.396978
0.269408	0.315077	0.384346	0.388815
0.266389	0.312928	0.376005	0.383905
0.269033	0.334845	0.370937	0.388466
0.264121	0.321353	0.377275	0.388281
0.261774	0.311395	0.386771	0.393908
0.271965	0.334448	0.380821	0.382668
0.258036	0.322683	0.381395	0.380298
0.252263	0.318142	0.37152	0.38035
0.257879	0.322541	0.378455	0.397439
0.268528	0.318573	0.372898	0.395774
0.255155	0.313298	0.359505	0.381953
0.262426	0.316051	0.367705	0.391826
0.260025	0.325566	0.380383	0.388626
0.254347	0.319639	0.383586	0.389112
0.262138	0.326097	0.371667	0.392753
0.265721	0.318795	0.377752	0.384294
0.261843	0.317886	0.371579	0.396229
0.260061	0.321237	0.371687	0.392716
0.25466	0.310996	0.370917	0.37451
0.260111	0.320173	0.367744	0.392881
0.252167	0.321144	0.370325	0.395169
0.258514	0.318504	0.37715	0.386526
0.265091	0.31004	0.380472	0.390367
0.262247	0.327147	0.385731	0.384077
0.273521	0.30843	0.377143	0.390596
0.253593	0.322378	0.370345	0.391731
0.261686	0.323021	0.37154	0.393856
0.264754	0.31851	0.387527	0.389988
0.267251	0.326553	0.373821	0.379084
0.256191	0.322931	0.383661	0.395856
0.26019	0.32321	0.363558	0.392422
0.256897	0.314204	0.376361	0.380547
0.26335	0.325267	0.380349	0.392256
0.262245	0.314832	0.381522	0.386023
0.259218	0.330141	0.376481	0.395077
0.260429	0.330724	0.37615	0.394247
0.266613	0.316542	0.371047	0.393201
0.269016	0.315117	0.380284	0.398224
0.260678	0.324644	0.368389	0.378136
0.263818	0.321423	0.37337	0.37847
0.266592	0.296979	0.380171	0.385999
0.261833	0.318876	0.382598	0.395194
0.256922	0.318166	0.376452	0.397655
0.254638	0.313591	0.375777	0.392398
0.273156	0.320269	0.375303	0.393221
0.262312	0.312044	0.368727	0.388192
0.269276	0.324044	0.382549	0.38344
0.261151	0.330192	0.367469	0.392676
0.262498	0.318823	0.369423	0.384369
0.257712	0.313983	0.382875	0.392552
0.259706	0.323634	0.377727	0.380959
0.260432	0.328701	0.381872	0.385584
0.262176	0.32482	0.376229	0.394621
0.258174	0.318669	0.377708	0.39346
0.250056	0.325764	0.375141	0.390997
0.253124	0.32248	0.377833	0.382584
0.255773	0.318574	0.382952	0.38709
0.252903	0.314528	0.373222	0.392082
0.258871	0.317436	0.382794	0.386113
0.253505	0.320311	0.379321	0.388669
0.259787	0.31869	0.377884	0.393624
0.264422	0.308766	0.389389	0.392675
0.269666	0.324465	0.374003	0.396635
0.266745	0.316795	0.382826	0.385398
0.258655	0.321918	0.375056	0.39402
0.264276	0.318796	0.380548	0.384598
0.262274	0.324938	0.378622	0.386253
0.263711	0.32404	0.373912	0.380409
0.2634	0.321466	0.377325	0.390191
0.27652	0.322168	0.369702	0.387989
0.260705	0.321745	0.371172	0.384054
0.264305	0.316208	0.373118	0.403068
0.263015	0.317682	0.378292	0.389475
0.264281	0.312536	0.378613	0.388069
0.26325	0.321075	0.381242	0.393775
0.265192	0.31301	0.378646	0.389012
0.265373	0.324917	0.380437	0.390186
0.27004	0.315707	0.371098	0.389569
0.260439	0.323044	0.372444	0.394165
0.258605	0.317428	0.375656	0.385879
0.260544	0.318467	0.370107	0.39435
0.266557	0.31773	0.373024	0.384725
0.260448	0.323153	0.373159	0.390623
0.265478	0.313187	0.37889	0.387458
0.264057	0.31377	0.365785	0.386704
0.264399	0.321906	0.383666	0.39537
0.256834	0.325801	0.357857	0.389039
0.260117	0.324573	0.374719	0.389229
0.273901	0.323422	0.371777	0.394433
0.264598	0.323573	0.378044	0.385545
0.258701	0.322263	0.367091	0.388106
0.256332	0.311131	0.371637	0.3821
0.255821	0.325647	0.381619	0.397479
0.269186	0.322892	0.3721	0.391187
0.264099	0.307592	0.375679	0.397646
0.265367	0.31577	0.379708	0.403346
0.258438	0.313883	0.377928	0.398537
0.26911	0.320828	0.375349	0.395042
0.269597	0.308541	0.384579	0.390428
0.262267	0.326954	0.380868	0.378963
0.27132	0.312768	0.374437	0.388672
0.259004	0.318202	0.381222	0.385513
0.252956	0.324885	0.373025	0.399257
0.259592	0.304722	0.38206	0.380172
0.259903	0.315296	0.376322	0.395153
0.259484	0.312468	0.367456	0.391111
0.267598	0.314129	0.380107	0.402076
0.259423	0.318184	0.381383	0.392464
0.270146	0.329105	0.375825	0.384991
0.26644	0.320377	0.377535	0.388676
0.249968	0.318301	0.373137	0.387642
0.260299	0.319762	0.369432	0.385562
0.262212	0.313264	0.370921	0.388281
0.26258	0.319912	0.379663	0.38872
0.263004	0.323642	0.370075	0.401953
0.261824	0.316184	0.365558	0.397785
0.270529	0.317098	0.3799	0.396017
0.263959	0.322073	0.374382	0.392346
0.258376	0.316272	0.372344	0.390401
0.258416	0.315534	0.371556	0.394745
0.257347	0.326052	0.381278	0.379397
0.261172	0.321783	0.3795	0.38953
0.25629	0.32947	0.39398	0.388698
0.249819	0.32067	0.37705	0.386612
0.272035	0.321857	0.377259	0.39656
0.260228	0.321773	0.372117	0.390156
0.253441	0.323394	0.374985	0.387912
0.263453	0.326202	0.375622	0.388887
0.26655	0.32353	0.374036	0.387153
0.263003	0.319586	0.37825	0.387078
0.257461	0.321345	0.378509	0.388635
0.26368	0.315711	0.372838	0.395929
0.268151	0.328448	0.373787	0.391903
0.261011	0.321668	0.374932	0.39404
0.267074	0.324551	0.382042	0.387708
0.264645	0.319994	0.374272	0.400173
0.270812	0.328784	0.373324	0.392495
0.26322	0.323556	0.368013	0.390523
0.267959	0.320442	0.381437	0.388431
0.253167	0.314563	0.377111	0.388879
0.252518	0.324976	0.376224	0.385076
0.258117	0.314802	0.373555	0.380136
0.259355	0.312503	0.371035	0.399099
0.26699	0.314454	0.370804	0.384451
0.251735	0.311679	0.376991	0.387204
0.264486	0.319695	0.375152	0.39241
0.262812	0.316558	0.377848	0.386627
0.263538	0.311828	0.371112	0.39295
0.265657	0.316708	0.385333	0.387107
0.268767	0.315965	0.384722	0.388611
0.256354	0.321147	0.390324	0.396702
0.264773	0.318717	0.388308	0.38274
0.254932	0.32768	0.374597	0.388358
0.260027	0.324559	0.385469	0.384168
0.253094	0.318296	0.381743	0.39824
0.260347	0.310743	0.369549	0.399387
0.258972	0.305289	0.372669	0.391867
0.263815	0.314185	0.376186	0.391137
0.270056	0.324797	0.370485	0.388345
0.259369	0.326603	0.377429	0.380688
0.272814	0.320526	0.372822	0.3914
0.264571	0.321766	0.379397	0.387318
0.269634	0.312502	0.362654	0.389173
0.261576	0.312461	0.381595	0.3841
0.264832	0.326447	0.381373	0.380419
0.258142	0.32263	0.372046	0.401433
0.252975	0.318557	0.37484	0.386872
0.263128	0.319193	0.377333	0.382192
0.258037	0.324763	0.380907	0.388673
0.259362	0.324806	0.386944	0.398231
0.270564	0.315002	0.379239	0.397674
0.271984	0.330319	0.367157	0.383722
0.263412	0.316168	0.383906	0.395269
0.266138	0.325731	0.385835	0.399777
0.264566	0.323411	0.368619	0.398448
0.259045	0.325022	0.369762	0.39812
0.263989	0.330794	0.375788	0.395277
0.26186	0.325586	0.377221	0.389721
0.2683	0.326347	0.372952	0.386573
0.266262	0.320331	0.374949	0.391055
0.254888	0.325382	0.369229	0.398249
0.274291	0.324132	0.377652	0.38374
0.263728	0.330168	0.360782	0.398525
0.263143	0.326845	0.363459	0.394033
0.257965	0.311226	0.378765	0.390047
0.261876	0.321142	0.376387	0.38171
0.262077	0.319798	0.372849	0.395097
0.266557	0.321935	0.369697	0.395087
0.264765	0.323697	0.374349	0.394419
0.266723	0.320697	0.379554	0.388118
0.260602	0.318118	0.373737	0.399279
0.266634	0.330268	0.374913	0.382479
0.262117	0.320359	0.378859	0.394237
0.270091	0.313735	0.379113	0.39157
0.268773	0.317559	0.369197	0.391292
0.2536	0.310742	0.376519	0.401271
0.263798	0.322401	0.369042	0.38254
0.264151	0.315246	0.375055	0.393142
0.266695	0.320119	0.379057	0.388233
0.265165	0.311951	0.371005	0.388476
0.266637	0.3239	0.377914	0.385311
0.258866	0.319206	0.381325	0.385634
0.262723	0.319181	0.373014	0.39243
0.269233	0.329534	0.377594	0.382772
0.268192	0.31945	0.377375	0.389925
0.264256	0.3143	0.37369	0.386596
0.267149	0.319034	0.384235	0.377432
0.271151	0.324354	0.372196	0.390747
0.267563	0.323081	0.370867	0.39931
0.265559	0.324319	0.383149	0.38138
0.261165	0.317352	0.38234	0.386619
0.265453	0.311008	0.38083	0.387254
0.271793	0.320995	0.377692	0.395382
0.258896	0.319163	0.374736	0.387591
0.260707	0.311562	0.371202	0.382258
0.263293	0.314609	0.374277	0.392568
0.258051	0.321168	0.375692	0.390197
0.254517	0.321644	0.371128	0.397599
0.254975	0.310208	0.377354	0.39072
0.272099	0.316102	0.378718	0.384883
0.248894	0.312915	0.368143	0.389519
0.264499	0.322411	0.37023	0.391306
0.27102	0.319569	0.369076	0.392386
0.265996	0.333523	0.389055	0.387301
0.26484	0.328783	0.373649	0.387965
0.25915	0.330382	0.372844	0.387457
0.269406	0.320543	0.384134	0.396205
0.26016	0.311571	0.379701	0.383009
0.261488	0.320033	0.378857	0.391681
0.272391	0.321152	0.373273	0.39152
0.255462	0.301385	0.369436	0.388914
0.268655	0.315596	0.367015	0.385813
0.25279	0.325808	0.3757	0.396205
0.263284	0.321485	0.371885	0.39333
0.26452	0.325088	0.371833	0.390145
0.268219	0.31621	0.380708	0.401286
0.264347	0.318964	0.38461	0.390819
0.262349	0.326779	0.368675	0.397118
0.249952	0.30622	0.384705	0.392496
0.263025	0.320722	0.382196	0.381451
0.253863	0.330145	0.376395	0.397533
0.273482	0.325246	0.378481	0.397383
0.260016	0.312747	0.379472	0.382919
0.262186	0.316177	0.376721	0.382374
0.253367	0.321413	0.370744	0.394715
0.257691	0.318296	0.375823	0.398462
0.262872	0.320407	0.389254	0.398383
0.260377	0.315894	0.374975	0.382668
0.254405	0.326172	0.381744	0.386278
0.266498	0.314664	0.379409	0.381911
0.266067	0.318359	0.379682	0.38504
0.257635	0.314631	0.378739	0.394792
0.254985	0.319761	0.367796	0.394483
0.254374	0.316974	0.3662	0.388571
0.263269	0.319904	0.374677	0.395159
0.263084	0.321386	0.367568	0.394777
0.269301	0.322624	0.370316	0.393197
0.269898	0.30692	0.375729	0.388962
0.264675	0.325891	0.379348	0.396714
0.26679	0.309493	0.380719	0.382865
0.267993	0.313228	0.38243	0.385708
0.260767	0.322058	0.375614	0.393393
0.26478	0.316002	0.371491	0.383351
0.256414	0.323901	0.37212	0.392545
0.26016	0.310194	0.36968	0.393674
0.263183	0.317687	0.377392	0.392398
0.258568	0.315843	0.382682	0.392417
0.260324	0.319812	0.379344	0.398233
0.264404	0.325064	0.368827	0.389337
0.270122	0.312239	0.371576	0.390134
0.254322	0.32361	0.375167	0.381012
0.26534	0.319391	0.382057	0.388739
0.257971	0.322195	0.379063	0.386428
0.265791	0.318956	0.373962	0.393598
0.253966	0.307947	0.378211	0.397419
0.25911	0.32197	0.371176	0.375425
0.263612	0.324244	0.373735	0.391878
0.262196	0.320901	0.370791	0.389177
0.262686	0.316531	0.374512	0.402349
0.263318	0.310294	0.36703	0.396272
0.268591	0.314088	0.375106	0.389704
0.258766	0.326981	0.374215	0.387295
0.255542	0.320372	0.376247	0.392077
0.265388	0.32552	0.382377	0.378281
0.256431	0.330017	0.379145	0.394718
0.260959	0.308745	0.372859	0.380301
0.266209	0.321663	0.37084	0.384317
0.264841	0.310656	0.370699	0.390953
0.263732	0.319644	0.376054	0.383743
0.264323	0.316981	0.379131	0.388872
0.260733	0.320786	0.380025	0.38787
0.267211	0.322828	0.378946	0.391112
0.263054	0.324878	0.377594	0.38783
0.264847	0.328535	0.377553	0.398749
0.260238	0.313903	0.369851	0.391439
0.262597	0.331091	0.378568	0.392104
0.255604	0.314067	0.3707	0.404398
0.267564	0.31947	0.370831	0.39496
0.262388	0.326401	0.36981	0.399013
0.270614	0.316373	0.365591	0.384019
0.261658	0.319939	0.370115	0.389336
0.255378	0.302565	0.380463	0.388869
0.261963	0.311324	0.370855	0.389427
0.2644	0.317705	0.368299	0.397816
0.263376	0.324045	0.372672	0.395647
0.266725	0.321007	0.38537	0.377662
0.260916	0.308863	0.372088	0.385038
0.263291	0.315941	0.382065	0.398972
0.262517	0.314181	0.383034	0.38647
0.261907	0.316019	0.370547	0.396451
0.270787	0.323034	0.370888	0.388451
0.261892	0.321444	0.372349	0.391891
0.263626	0.308507	0.375752	0.384284
0.266184	0.317235	0.373536	0.38727
0.26239	0.321901	0.373	0.383115
0.255326	0.318919	0.375345	0.389527
0.263005	0.327906	0.381068	0.389823
0.265455	0.319092	0.383896	0.392575
0.253665	0.323522	0.381775	0.385996
0.260499	0.333072	0.379932	0.389507
0.263531	0.325373	0.367618	0.392999
0.260867	0.316784	0.372596	0.389934
0.270952	0.324904	0.38311	0.380471
0.267959	0.32865	0.386036	0.380583
0.266452	0.313242	0.371885	0.389246
0.277059	0.318351	0.374062	0.378134
0.263872	0.320995	0.37828	0.396825
0.255714	0.325163	0.380099	0.388985
0.263712	0.316183	0.376478	0.394314
0.256335	0.319482	0.359942	0.390504
0.26172	0.319185	0.383133	0.389455
0.262437	0.316225	0.377162	0.397485
0.258467	0.319432	0.373254	0.391764
0.259077	0.321107	0.368247	0.393734
0.260654	0.30774	0.384132	0.383934
0.262183	0.315948	0.367187	0.384593
0.264416	0.316207	0.36952	0.398373
0.255409	0.324639	0.382794	0.399021
0.252831	0.316982	0.376334	0.38986
0.262338	0.320835	0.380218	0.39883
0.259102	0.318388	0.384205	0.392428
0.261638	0.317768	0.38111	0.386751
0.255732	0.320773	0.360509	0.398535
0.252023	0.318972	0.377736	0.391812
0.264637	0.322697	0.384083	0.382835
0.258361	0.314282	0.379816	0.393635
0.26338	0.315228	0.375384	0.388973
0.260281	0.31368	0.376682	0.390986
0.259928	0.324975	0.374135	0.391813
0.269221	0.316729	0.380831	0.393532
0.259851	0.318248	0.378391	0.382056
0.273035	0.327674	0.376286	0.388781
0.26378	0.315499	0.379397	0.389625
0.264382	0.328486	0.373731	0.374561
0.259275	0.324865	0.370574	0.386313
0.265278	0.319579	0.376894	0.388066
0.258468	0.312705	0.385232	0.386978
0.261362	0.314517	0.3758	0.400751
0.261948	0.306751	0.37703	0.389838
0.262547	0.325096	0.373718	0.394169
0.264351	0.317422	0.377602	0.386186
0.255313	0.326594	0.376044	0.388585
0.260193	0.32239	0.377275	0.387097
0.260701	0.322221	0.377433	0.396336
0.259091	0.325827	0.378096	0.393948
0.264329	0.312936	0.363421	0.393664
0.263267	0.318594	0.368881	0.382668
0.26009	0.325948	0.383848	0.380122
0.258764	0.32285	0.370889	0.39342
0.256331	0.318183	0.383782	0.386546
0.261713	0.313507	0.364541	0.396167
0.258493	0.317458	0.370902	0.397847
0.26619	0.322942	0.377138	0.396516
0.260252	0.318066	0.371368	0.381387
0.248232	0.323283	0.375808	0.384312
0.264973	0.314664	0.375342	0.386622
0.258804	0.314858	0.375542	0.390975
0.255233	0.322316	0.38084	0.38828
0.254972	0.319072	0.374337	0.393652
0.259334	0.315456	0.381007	0.394504
0.260275	0.326434	0.391559	0.393058
0.264467	0.320485	0.37588	0.384406
0.255537	0.31891	0.372291	0.394319
0.259527	0.310832	0.379608	0.389899
0.258039	0.326246	0.37145	0.383782
0.260228	0.323301	0.371761	0.388288
0.266832	0.311499	0.36924	0.376651
0.264049	0.323404	0.374982	0.389802
0.271016	0.312942	0.370963	0.385149
0.265935	0.318039	0.37755	0.386739
0.269894	0.316735	0.376754	0.396239
0.259858	0.317929	0.374815	0.394025
0.263292	0.320086	0.371183	0.394214
0.265921	0.311058	0.376245	0.379685
0.26861	0.324606	0.384226	0.379138
0.255431	0.322616	0.377343	0.389911
0.252489	0.323241	0.372943	0.378809
0.25782	0.326691	0.385147	0.402722
0.255297	0.318266	0.380355	0.392236
0.2628	0.312033	0.381512	0.392039
0.267369	0.313122	0.366568	0.393475
0.265913	0.322898	0.38217	0.390305
0.259241	0.324075	0.381252	0.39191
0.264567	0.313781	0.361933	0.388116
0.258675	0.329514	0.373573	0.379558
0.263245	0.320314	0.3769	0.393271
0.258114	0.322111	0.365841	0.380919
0.259587	0.315354	0.364083	0.391133
0.267601	0.325802	0.372519	0.390444
0.260405	0.322536	0.36688	0.387306
0.261877	0.322129	0.372761	0.379558
0.26456	0.329396	0.374543	0.386466
0.272116	0.311183	0.376243	0.391743
0.261454	0.318041	0.376531	0.390187
0.258744	0.323331	0.366146	0.38164
0.264952	0.321405	0.370924	0.396587
0.260634	0.315325	0.379725	0.393257
0.26398	0.320706	0.363587	0.393316
0.266179	0.312633	0.375016	0.388764
0.263103	0.324584	0.370765	0.394211
0.272475	0.306639	0.375288	0.395875
0.265616	0.306407	0.373468	0.393436
0.256273	0.331627	0.371991	0.391552
0.268628	0.32097	0.373731	0.394389
0.260376	0.314344	0.374941	0.385051
0.253517	0.319939	0.377211	0.387942
0.259485	0.317203	0.380487	0.392644
0.268118	0.325284	0.386327	0.383626
0.259949	0.32208	0.386103	0.387194
0.265115	0.314157	0.371696	0.389118
0.259152	0.316381	0.373415	0.391489
0.244527	0.315797	0.371435	0.376247
0.257508	0.312674	0.366985	0.391431
0.268808	0.321504	0.37815	0.397103
0.256735	0.311715	0.364665	0.392448
0.261633	0.321749	0.373272	0.397102
0.256396	0.31927	0.384405	0.388342
0.259164	0.315204	0.370758	0.389507
0.265294	0.319716	0.374248	0.392343
0.266628	0.309511	0.374878	0.390626
0.270338	0.31761	0.364207	0.392314
0.268977	0.311494	0.3748	0.390529
0.254407	0.320102	0.376347	0.376528
0.264517	0.315156	0.387076	0.392291
0.258175	0.321774	0.381561	0.374062
0.267328	0.321285	0.384629	0.392311
0.268364	0.33167	0.378534	0.392662
0.268302	0.315537	0.37763	0.387164
0.25862	0.32484	0.373472	0.39513
0.265802	0.321535	0.381862	0.385916
0.270164	0.317787	0.380202	0.392793
0.269502	0.330691	0.377817	0.386861
0.261969	0.31672	0.376314	0.385482
0.253688	0.32463	0.382902	0.384026
0.260787	0.315891	0.378262	0.39186
0.261859	0.321312	0.379079	0.390586
0.266451	0.313525	0.366907	0.394863
0.255085	0.308706	0.372935	0.396939
0.267046	0.31333	0.375443	0.395855
0.26168	0.326427	0.373094	0.392038
0.256868	0.325844	0.37262	0.401904
0.262023	0.324925	0.377837	0.399737
0.256626	0.332756	0.375267	0.385305
0.25808	0.316949	0.37485	0.391536
0.25732	0.327858	0.380917	0.378831
0.265586	0.308177	0.365984	0.385938
0.257827	0.323081	0.37815	0.397732
0.26636	0.316355	0.390665	0.387549
0.258028	0.319821	0.380442	0.385057
0.263662	0.308021	0.373814	0.385213
0.263823	0.323911	0.374691	0.386933
0.267862	0.318651	0.374076	0.389888
0.260292	0.312645	0.371287	0.380812
0.257335	0.314565	0.377768	0.386788
0.257174	0.304805	0.370253	0.385608
0.258932	0.325532	0.379863	0.395614
0.261504	0.320287	0.380477	0.395513
0.270274	0.314407	0.368979	0.384515
0.257867	0.318581	0.36516	0.397968
0.25738	0.315429	0.365557	0.398307
0.259202	0.325426	0.376608	0.389141
0.25893	0.316288	0.369255	0.384441
0.259847	0.321543	0.373697	0.383765
0.260086	0.326409	0.372548	0.396114
0.27101	0.318046	0.382832	0.392343
0.260163	0.314048	0.37948	0.380574
0.266154	0.322584	0.37393	0.395791
0.268099	0.327606	0.373278	0.395463
0.261018	0.31729	0.374953	0.389068
0.263716	0.32257	0.367247	0.393121
0.260597	0.32423	0.370436	0.39616
0.24756	0.31865	0.367748	0.380475
0.259987	0.319877	0.378188	0.396249
0.267704	0.319232	0.380155	0.386677
0.266032	0.318622	0.376771	0.396137
0.259326	0.314909	0.373338	0.386446
0.264045	0.310715	0.382092	0.409979
0.265343	0.322631	0.374129	0.401428
0.268057	0.324698	0.377059	0.397762
0.267438	0.32346	0.378925	0.395507
0.261406	0.317996	0.372679	0.392017
0.263826	0.331415	0.372751	0.380969
0.253065	0.31805	0.372937	0.390636
0.270208	0.314399	0.375721	0.39517
0.270382	0.319899	0.373053	0.395309
0.272748	0.315243	0.36958	0.397273
0.262722	0.31555	0.367931	0.390174
0.263561	0.323565	0.365762	0.39283
0.263986	0.320986	0.37405	0.400474
0.264993	0.315943	0.375299	0.388635
0.262517	0.325602	0.362021	0.395889
0.255046	0.323659	0.369754	0.403835
0.261998	0.312885	0.376347	0.395888
0.277039	0.327215	0.380288	0.38047
0.255276	0.327152	0.381127	0.393017
0.257137	0.318332	0.376617	0.398091
0.265527	0.316859	0.386713	0.390182
0.261728	0.32645	0.382564	0.39952
0.261531	0.325807	0.376313	0.385473
0.262176	0.326145	0.374953	0.38594
0.266027	0.325943	0.379703	0.386505
0.26596	0.304268	0.372	0.388062
0.270193	0.314958	0.381895	0.384719
0.259599	0.316644	0.377832	0.396502
0.251683	0.315432	0.375361	0.391003
0.268261	0.316626	0.383495	0.382579
0.262229	0.317136	0.372906	0.396479
0.267255	0.321262	0.367912	0.38723
0.248694	0.320101	0.370298	0.389098
0.258788	0.319885	0.374712	0.3928
0.255917	0.315561	0.375074	0.391253
0.257809	0.319206	0.367821	0.389005
0.258884	0.319966	0.375626	0.398846
0.252639	0.333388	0.364521	0.398246
0.269007	0.316454	0.368847	0.387836
0.267792	0.321641	0.367392	0.394338
0.256332	0.320685	0.378138	0.39523
0.25403	0.315243	0.376643	0.391422
0.261221	0.310712	0.373021	0.385552
0.262155	0.324942	0.378241	0.391317
0.259703	0.322334	0.375592	0.388914
0.255731	0.32014	0.375141	0.391714
0.26835	0.312181	0.368046	0.398149
0.263984	0.322547	0.375364	0.382861
0.262851	0.320527	0.367934	0.383713
0.261288	0.323788	0.380046	0.389138
0.259171	0.31426	0.372613	0.384393
0.260333	0.314005	0.373053	0.386695
0.257317	0.316735	0.379944	0.400682
0.258881	0.311975	0.385446	0.38951
0.259164	0.326539	0.379473	0.383223
0.264135	0.323171	0.373475	0.391542
0.252925	0.324298	0.372259	0.389594
0.276496	0.328273	0.369798	0.393392
0.264048	0.315295	0.377931	0.392344
0.269482	0.319608	0.376496	0.38445
0.267848	0.322708	0.373887	0.379336
0.260913	0.312133	0.367969	0.388791
0.260835	0.316359	0.376755	0.395588
0.249679	0.316739	0.373498	0.39037
0.261445	0.326247	0.370546	0.390346
0.261203	0.325034	0.376549	0.391237
0.261519	0.313895	0.377385	0.385865
0.256747	0.321388	0.371912	0.380986
0.270058	0.318356	0.38441	0.38591
0.255393	0.312515	0.378971	0.378322
0.258517	0.316873	0.379783	0.398123
0.261904	0.320669	0.373427	0.388977
0.259306	0.317296	0.378518	0.392031
0.264385	0.326484	0.382354	0.395291
0.259893	0.320579	0.379983	0.392052
0.263891	0.322767	0.380001	0.391226
0.257973	0.312591	0.386812	0.387739
0.27367	0.31584	0.371628	0.37777
0.264329	0.312637	0.377036	0.381993
0.255531	0.320406	0.37161	0.394119
0.260224	0.320732	0.379749	0.391053
0.260564	0.317908	0.365798	0.395687
0.264988	0.31853	0.378455	0.392182
0.261213	0.318179	0.381499	0.386502
0.271132	0.319463	0.384673	0.381982
0.267056	0.321879	0.381143	0.392467
0.266951	0.31963	0.377336	0.392061
0.256436	0.316817	0.3782	0.398876
0.26647	0.315909	0.383178	0.3977
0.270468	0.322529	0.381947	0.390055
0.255928	0.321436	0.376881	0.38769
0.257903	0.329622	0.375548	0.379738
0.258588	0.308367	0.376246	0.398595
0.259299	0.310409	0.370708	0.389565
0.264178	0.329075	0.37553	0.390818
0.260302	0.319615	0.38131	0.402061
0.268422	0.316799	0.379701	0.391141
0.267916	0.31533	0.371507	0.385089
0.261985	0.317136	0.37019	0.391978
0.266035	0.317688	0.371792	0.395858
0.262354	0.325809	0.370839	0.391115
0.270853	0.327124	0.379499	0.39759
0.266278	0.322312	0.378737	0.388546
0.26343	0.31945	0.373217	0.398173
0.259065	0.314355	0.386323	0.396512
0.261733	0.309283	0.380073	0.38463
0.260992	0.312276	0.386839	0.391648
0.257168	0.322412	0.373772	0.395184
0.265348	0.30481	0.374901	0.383154
0.257391	0.324603	0.381349	0.392296
0.280281	0.316564	0.36289	0.38652
0.257111	0.32233	0.380386	0.382939
0.262391	0.31623	0.385069	0.386597
0.258209	0.316454	0.368024	0.391707
0.263576	0.324049	0.37888	0.397716
0.250248	0.313827	0.367831	0.384603
0.25956	0.317327	0.375872	0.3971
0.262229	0.332964	0.386802	0.386639
0.260809	0.316731	0.367764	0.402621
0.263296	0.313384	0.37456	0.404429
0.25951	0.316095	0.375492	0.380933
0.26357	0.321812	0.383415	0.399042
0.264824	0.320113	0.383851	0.394016
0.271987	0.312119	0.375575	0.390836
0.260895	0.316745	0.371642	0.387913
0.263212	0.326541	0.374748	0.387585
0.253289	0.317797	0.375574	0.390606
0.26874	0.317735	0.372532	0.386642
0.254639	0.318394	0.369684	0.386779
0.262767	0.313758	0.380845	0.38857
0.26601	0.309862	0.371404	0.394212
0.260573	0.31584	0.373812	0.392029
0.270145	0.318808	0.373563	0.397165
0.25934	0.31192	0.371474	0.389434
0.264604	0.32233	0.379526	0.389276
0.263076	0.314217	0.383763	0.399188
0.261015	0.322746	0.376422	0.390037
0.257242	0.31581	0.368035	0.385021
0.256242	0.312476	0.379881	0.388339
0.259829	0.312265	0.380503	0.390256
0.258361	0.322045	0.378954	0.387162
0.256423	0.308137	0.375637	0.396038
0.258698	0.323848	0.382438	0.392465
0.26436	0.319157	0.389651	0.388687
0.270098	0.311661	0.369843	0.403086
0.263468	0.310095	0.37798	0.384381
0.260084	0.314681	0.375153	0.384129
0.271117	0.318128	0.378588	0.389408
0.25819	0.312386	0.371304	0.38841
0.269717	0.322345	0.374057	0.394975
0.255932	0.321837	0.369974	0.394159
0.255953	0.311277	0.38345	0.398138
0.264756	0.331824	0.380089	0.38879
0.26773	0.31019	0.38035	0.395759
0.247781	0.312169	0.381335	0.388124
0.268015	0.321531	0.370046	0.391678
0.253657	0.321528	0.384755	0.392179
0.265871	0.311206	0.372846	0.39939
0.26464	0.319521	0.37171	0.378506
0.257516	0.326073	0.373014	0.394119
0.262406	0.310475	0.376144	0.398914
0.261918	0.31927	0.373342	0.391262
0.273698	0.318029	0.370471	0.393445
0.258247	0.320718	0.373428	0.374251
0.263242	0.317605	0.381144	0.392819
0.263298	0.315426	0.362689	0.388428
0.25969	0.324856	0.380941	0.382974
0.26238	0.319266	0.382021	0.396804
0.254471	0.319777	0.390659	0.384755
0.264911	0.312882	0.369572	0.390876
0.252134	0.322879	0.371455	0.391749
0.269761	0.323739	0.380239	0.40183
0.260851	0.319769	0.384023	0.381379
0.269039	0.324738	0.373346	0.39228
0.255673	0.315562	0.38228	0.386608
0.252351	0.310769	0.384561	0.399126
0.259402	0.31933	0.372057	0.38779
0.260926	0.326092	0.367401	0.395591
0.25918	0.322418	0.37849	0.387775
0.265231	0.322903	0.364846	0.37832
0.258324	0.3236	0.386695	0.401653
0.266968	0.332229	0.386769	0.38382
0.260736	0.324746	0.376164	0.398174
0.26088	0.325545	0.387998	0.383858
0.265595	0.325878	0.369651	0.380894
0.255383	0.320102	0.368455	0.396561
0.26931	0.320777	0.370379	0.390674
0.260288	0.317367	0.378217	0.387896
0.264284	0.319202	0.370763	0.39905
0.258064	0.314578	0.365786	0.399321
0.262732	0.324939	0.382573	0.395502
0.266933	0.322247	0.37687	0.382741
0.266263	0.323804	0.374782	0.379542
0.26158	0.312625	0.369509	0.3942
0.258149	0.32381	0.369896	0.391303
0.258469	0.313823	0.379908	0.389383
0.270542	0.308359	0.375545	0.381105
0.271709	0.329785	0.378215	0.389475
0.256986	0.325613	0.377067	0.381112
0.259961	0.319712	0.388498	0.406038
0.257185	0.320358	0.369692	0.384606
0.264312	0.32186	0.371161	0.39207
0.270871	0.327674	0.38407	0.387237
0.273109	0.31794	0.379492	0.394261
0.262357	0.317232	0.378292	0.396256
0.269809	0.317936	0.384936	0.385373
0.269653	0.320668	0.380976	0.393026
0.261812	0.329317	0.376415	0.397714
0.263568	0.31448	0.37272	0.396674
0.258343	0.316427	0.380174	0.39691
0.259171	0.324968	0.380478	0.391508
0.276114	0.317421	0.37279	0.38358
0.258606	0.320656	0.38482	0.394787
0.257095	0.318478	0.370164	0.399058
0.257085	0.320379	0.374881	0.395378
0.258707	0.313911	0.37468	0.394223
0.266345	0.320816	0.376839	0.379361
0.266325	0.324429	0.377652	0.376292
0.270147	0.323463	0.373961	0.389748
0.257855	0.313171	0.38172	0.392621
0.26573	0.311716	0.377576	0.3895
0.269429	0.321881	0.380634	0.388846
0.261108	0.3164	0.37005	0.379132
0.264066	0.322163	0.375607	0.397471
0.264473	0.309122	0.382339	0.385781
0.263737	0.31123	0.38159	0.393051
0.261248	0.324689	0.373866	0.385109
0.263694	0.319635	0.385862	0.380944
0.268759	0.30723	0.375716	0.388083
0.267977	0.319839	0.372182	0.404046
0.260516	0.322467	0.366862	0.396674
0.258643	0.316257	0.372627	0.389413
0.262725	0.317284	0.378124	0.392681
0.255898	0.326493	0.38428	0.392788
0.266106	0.320114	0.375745	0.39502
0.266724	0.309367	0.376811	0.391615
0.268758	0.316655	0.372637	0.384734
0.25605	0.312903	0.379415	0.386902
0.261581	0.322331	0.37989	0.386991
0.254133	0.328191	0.383848	0.380464
0.269372	0.309522	0.384429	0.389673
0.263642	0.32245	0.368288	0.391116
0.263366	0.320701	0.386401	0.387394
0.267875	0.318892	0.368859	0.388892
0.261732	0.314349	0.375186	0.382134
0.267825	0.308828	0.376168	0.402039
0.275533	0.328123	0.366053	0.385514
0.265179	0.322924	0.373385	0.395659
0.252235	0.318391	0.374949	0.38908
0.2564	0.323609	0.375862	0.385362
0.256108	0.321639	0.383602	0.386266
0.257703	0.323731	0.391971	0.398161
0.254159	0.317952	0.377906	0.388255
0.26778	0.321398	0.379001	0.389221
0.265142	0.314813	0.375582	0.400735
0.26224	0.317987	0.37755	0.390927
0.272849	0.322831	0.374077	0.386235
0.264688	0.31589	0.379983	0.390003
0.268291	0.312764	0.371017	0.397797
0.265671	0.314565	0.379941	0.400247
0.25977	0.318066	0.38499	0.386581
0.25004	0.312003	0.373759	0.395627
0.258168	0.324221	0.375083	0.398063
0.256993	0.317708	0.377522	0.397268
0.258254	0.320732	0.373858	0.396046
0.259149	0.320869	0.39353	0.390066
0.255847	0.323549	0.383044	0.394418
0.263332	0.327049	0.381642	0.392174
0.261357	0.313356	0.373399	0.390223
0.26462	0.319551	0.383306	0.392166
0.254358	0.32915	0.374583	0.393008
0.272543	0.31395	0.377356	0.387579
0.26416	0.315717	0.371118	0.391723
0.256567	0.312068	0.378792	0.391078
0.258118	0.324879	0.368566	0.394289
0.269553	0.316399	0.364949	0.385672
0.258899	0.311899	0.374792	0.385828
0.266516	0.321324	0.368136	0.391182
0.269149	0.319342	0.372206	0.380834
0.263864	0.326599	0.389501	0.389182
0.262139	0.313296	0.376334	0.385054
0.264239	0.322842	0.367608	0.397193
0.266628	0.315751	0.381917	0.393399
0.263122	0.322147	0.370837	0.393312
0.254921	0.319943	0.370116	0.40279
0.268323	0.315105	0.377292	0.391846
0.255923	0.31772	0.374759	0.390732
0.260888	0.317602	0.365443	0.387089
0.262963	0.320798	0.388824	0.390309
0.26802	0.316158	0.37049	0.39448
0.2654	0.311176	0.369108	0.386781
0.259669	0.325241	0.384526	0.385341
0.265839	0.321534	0.378309	0.384035
0.2645	0.321639	0.386527	0.390894
0.261209	0.317794	0.375884	0.388352
0.255764	0.330637	0.374479	0.394837
0.260667	0.318986	0.377422	0.391899
0.261193	0.326199	0.369912	0.384697
0.270427	0.326426	0.381182	0.3811
0.258503	0.322521	0.380738	0.396789
0.265165	0.31984	0.387815	0.389864
0.259586	0.315693	0.378082	0.394888
0.264497	0.321615	0.380483	0.376521
0.254759	0.32687	0.376154	0.386856
0.258881	0.305313	0.386472	0.388693
0.259143	0.3283	0.384204	0.394997
0.260052	0.319821	0.372892	0.389756
0.259824	0.313869	0.387902	0.392761
0.265798	0.324912	0.374319	0.39238
0.264035	0.316431	0.387559	0.383579
0.269573	0.317513	0.373987	0.397263
0.264591	0.319795	0.37467	0.400193
0.260725	0.324024	0.359843	0.392907
0.264366	0.31783	0.380354	0.39171
0.264513	0.317684	0.378931	0.387827
0.268393	0.315008	0.373578	0.399688
0.269147	0.323477	0.377191	0.391331
0.267375	0.320376	0.37519	0.392258
0.252794	0.320303	0.37743	0.399344
0.260819	0.316131	0.380644	0.389269
0.263036	0.313766	0.375234	0.383981
0.269516	0.321505	0.36268	0.397144
0.263517	0.308154	0.375085	0.38839
0.259195	0.316817	0.363495	0.395477
0.267696	0.319583	0.381881	0.387664
0.265251	0.322301	0.371404	0.388593
0.267214	0.32001	0.372452	0.387676
0.262013	0.30882	0.370375	0.386923
0.270123	0.326709	0.383845	0.39736
0.263887	0.325433	0.383609	0.393107
0.260165	0.32216	0.376386	0.384283
0.252727	0.32556	0.381289	0.396527
0.264289	0.320128	0.371906	0.390744
0.26779	0.323625	0.37705	0.384717
0.262883	0.326104	0.376635	0.390755
0.259492	0.318075	0.364673	0.401752
0.263247	0.309584	0.381966	0.395421
0.263745	0.330481	0.380421	0.391362
0.263799	0.325945	0.379079	0.390997
0.262837	0.317117	0.371089	0.38175
0.263399	0.310755	0.38708	0.387312
0.256945	0.313746	0.381909	0.393022
0.257803	0.329063	0.37874	0.386876
0.257439	0.306298	0.375472	0.384037
0.260692	0.311808	0.366074	0.382369
0.259532	0.303562	0.380626	0.38747
0.255473	0.32909	0.370734	0.374571
0.266037	0.315668	0.378005	0.375225
0.257391	0.318052	0.374034	0.394656
0.268103	0.319322	0.370215	0.387438
0.26137	0.318113	0.382811	0.397149
0.257419	0.32064	0.373875	0.384915
0.269806	0.321278	0.377817	0.399323
0.265025	0.314973	0.379221	0.393573
0.263179	0.325565	0.374494	0.389976
0.266055	0.324854	0.378118	0.398584
0.264873	0.316058	0.380145	0.385232
0.255638	0.317434	0.376746	0.383759
0.251911	0.314652	0.380567	0.388783
0.265844	0.310285	0.375177	0.391348
0.261164	0.309567	0.375332	0.388435
0.256761	0.314883	0.373294	0.397906
0.254543	0.311553	0.371957	0.395441
0.258514	0.31102	0.38624	0.388927
0.272296	0.317822	0.379689	0.381072
0.254565	0.321856	0.367373	0.392749
0.266339	0.31605	0.370767	0.38506
0.261199	0.321877	0.374834	0.389199
0.259992	0.321568	0.379382	0.383487
0.263974	0.316666	0.384759	0.396526
0.259741	0.324079	0.376176	0.387017
0.263294	0.320084	0.372062	0.383256
0.268031	0.306223	0.369946	0.385022
0.261841	0.317531	0.374944	0.384665
0.260452	0.321097	0.37587	0.388065
0.258743	0.32114	0.371793	0.388706
0.255008	0.30948	0.384114	0.388559
0.269005	0.322964	0.377174	0.397982
0.271585	0.321141	0.370876	0.397507
0.260419	0.321357	0.385984	0.392982
0.264807	0.321023	0.374912	0.394552
0.264351	0.316023	0.383076	0.387777
0.262388	0.309788	0.380356	0.394039
0.262457	0.32723	0.365831	0.388195
0.261459	0.319165	0.372169	0.389756
0.25087	0.32458	0.381051	0.395702
0.262467	0.313374	0.384635	0.39513
0.263218	0.31649	0.373057	0.389005
0.266151	0.32177	0.376662	0.391998
0.270971	0.326076	0.373036	0.392154
0.262613	0.325126	0.375823	0.383246
0.265222	0.311487	0.370535	0.383397
0.264855	0.312853	0.372072	0.378144
0.257701	0.325948	0.365787	0.389328
0.269441	0.325106	0.375312	0.391712
0.26001	0.317379	0.382398	0.390262
0.265744	0.314407	0.364687	0.389948
0.252606	0.314816	0.3765	0.396338
0.269625	0.320974	0.366861	0.393013
0.261618	0.319736	0.381016	0.395193
0.264572	0.312135	0.378608	0.389445
0.265456	0.317397	0.375321	0.385152
0.267253	0.321351	0.381199	0.388519
0.253686	0.319118	0.380169	0.383349
0.262608	0.327308	0.371211	0.386372
0.258184	0.321444	0.375075	0.400173
0.26814	0.32268	0.378075	0.383293
0.268465	0.322147	0.383902	0.387329
0.254043	0.316516	0.381346	0.385606
0.260751	0.312381	0.37675	0.392197
0.261635	0.313602	0.363088	0.396575
0.272053	0.32252	0.369713	0.382558
0.266696	0.316213	0.378056	0.40076
0.266116	0.311796	0.371495	0.393951
0.251769	0.314996	0.383013	0.383369
0.263019	0.31463	0.362382	0.404269
0.261838	0.310086	0.369864	0.394277
0.261395	0.329826	0.377287	0.396021
0.270598	0.317563	0.383812	0.389631
0.268446	0.31482	0.370246	0.379846
0.269027	0.320608	0.372847	0.392956
0.259246	0.32684	0.382848	0.383334
0.265783	0.31536	0.368382	0.384512
0.25593	0.315045	0.372612	0.395613
0.25725	0.320147	0.368986	0.393767
0.259186	0.322726	0.369852	0.396333
0.257637	0.317088	0.36944	0.3887
0.265987	0.318329	0.376335	0.388069
0.260123	0.321574	0.377609	0.399151
0.263366	0.313889	0.376065	0.388055
0.264372	0.319797	0.368319	0.394208
0.265787	0.317844	0.376379	0.391681
0.266359	0.321109	0.379658	0.388423
0.262963	0.316967	0.370429	0.387291
0.256453	0.317215	0.367351	0.391948
0.265858	0.316119	0.372418	0.395392
0.262177	0.321817	0.372428	0.381393
0.263225	0.320995	0.374891	0.394171
0.269133	0.320098	0.382231	0.389965
0.264414	0.318858	0.379853	0.38451
0.25563	0.327132	0.372173	0.38274
0.264509	0.314832	0.376165	0.393488
0.271087	0.312325	0.373884	0.387902
0.25607	0.322993	0.379565	0.388156
0.261241	0.316996	0.377464	0.385942
0.261975	0.312769	0.37633	0.382628
0.258171	0.311118	0.37535	0.385422
0.260672	0.312976	0.373968	0.392329
0.258667	0.320261	0.374711	0.390052
0.262073	0.31609	0.386775	0.380508
0.270897	0.314156	0.37206	0.382465
0.253891	0.30887	0.373652	0.385671
0.260144	0.323633	0.37903	0.397408
0.259222	0.323138	0.367859	0.402405
0.260344	0.326381	0.383321	0.384956
0.261651	0.317021	0.379421	0.391856
0.276773	0.334015	0.365942	0.390128
0.261444	0.311846	0.367793	0.382868
0.263926	0.320565	0.366081	0.395616
0.265631	0.320637	0.378789	0.388076
0.262597	0.315427	0.382933	0.392024
0.263309	0.329263	0.372856	0.399891
0.259551	0.325599	0.380032	0.391867
0.254813	0.321649	0.373761	0.383238
0.263184	0.314726	0.385353	0.385775
0.264698	0.320281	0.379892	0.384177
0.257014	0.314867	0.371363	0.397082
0.263216	0.327969	0.373762	0.395809
0.258099	0.317639	0.377204	0.390169
0.263984	0.321059	0.370537	0.393761
0.267334	0.323533	0.371904	0.392202
0.25491	0.319676	0.375576	0.396094
0.257205	0.321321	0.3763	0.392598
0.259857	0.319369	0.368274	0.386078
0.265432	0.307901	0.358531	0.397931
0.266628	0.317113	0.371082	0.383633
0.260081	0.321783	0.379392	0.390932
0.259358	0.326211	0.383837	0.387002
0.25865	0.331041	0.378129	0.388281
0.258914	0.316399	0.384436	0.39389
0.266876	0.316829	0.372901	0.385423
0.269666	0.330534	0.375463	0.391701
0.255032	0.312729	0.370838	0.386441
0.266405	0.316765	0.380687	0.393214
0.261372	0.318517	0.375055	0.386739
0.260057	0.321215	0.375568	0.38836
0.265968	0.329134	0.377063	0.389417
0.269452	0.321489	0.390556	0.403185
0.264765	0.311412	0.375292	0.386499
0.262548	0.321143	0.381625	0.381624
0.257291	0.31272	0.37948	0.390584
0.257434	0.326099	0.373709	0.384126
0.26043	0.32635	0.378275	0.391615
0.269307	0.323786	0.373142	0.390464
0.272465	0.308503	0.37196	0.395615
0.261234	0.319715	0.37984	0.390291
0.260277	0.313227	0.370499	0.389569
0.259277	0.320422	0.375917	0.387335
0.272394	0.322297	0.378004	0.390384
0.261204	0.319486	0.380182	0.392827
0.25628	0.319626	0.371005	0.400684
0.270092	0.318578	0.378234	0.387547
0.272256	0.318789	0.380801	0.397166
0.263467	0.323578	0.365398	0.384693
0.271503	0.326032	0.383373	0.398447
0.266917	0.311725	0.381003	0.394418
0.259744	0.322173	0.377329	0.386842
0.267958	0.316223	0.375667	0.388435
0.263034	0.322007	0.373309	0.381266
0.255406	0.32827	0.368443	0.392221
0.262366	0.31845	0.371405	0.3936
0.262953	0.322463	0.37176	0.380449
0.251591	0.323358	0.37628	0.397752
0.262377	0.32797	0.382007	0.396366
0.259167	0.321397	0.367778	0.389896
0.266317	0.313496	0.387908	0.390464
0.253985	0.324226	0.381393	0.38267
0.254084	0.318303	0.38039	0.387412
0.268279	0.311821	0.372994	0.392356
0.262987	0.326998	0.382055	0.383857
0.272815	0.329031	0.365712	0.393645
0.273545	0.316021	0.374859	0.390456
0.257686	0.320753	0.378145	0.394348
0.256656	0.313354	0.371959	0.402587
0.264006	0.31306	0.380217	0.391309
0.252378	0.320764	0.370595	0.394409
0.262838	0.321149	0.379891	0.384324
0.266932	0.3099	0.385242	0.393508
0.260248	0.317337	0.375543	0.399514
0.267699	0.318769	0.378987	0.392832
0.261986	0.311704	0.364955	0.382587
0.256877	0.315424	0.38023	0.386068
0.266079	0.314101	0.380011	0.386054
0.263165	0.31646	0.37686	0.392481
0.264944	0.311879	0.369945	0.389815
0.260547	0.324239	0.370849	0.396404
0.259639	0.32486	0.377788	0.390956
0.262907	0.333288	0.379098	0.384193
0.25751	0.306416	0.37221	0.386025
0.259893	0.316765	0.372149	0.378367
0.255425	0.316199	0.380827	0.390741
0.266794	0.317415	0.369181	0.374034
0.260481	0.324423	0.368235	0.391982
0.257789	0.310996	0.375583	0.398457
0.257289	0.319371	0.374216	0.388233
0.257843	0.321357	0.370159	0.376873
0.270262	0.319162	0.373591	0.388788
0.265926	0.322146	0.381174	0.38885
0.261879	0.321543	0.374599	0.393324
0.263021	0.320844	0.376455	0.378534
0.267292	0.312857	0.376623	0.39376
0.260003	0.329248	0.381308	0.391907
0.261678	0.316425	0.376233	0.397069
0.258361	0.314739	0.377558	0.389981
0.255775	0.318013	0.386226	0.383264
0.259969	0.315059	0.384934	0.394546
0.26355	0.327292	0.373317	0.39863
0.266054	0.319707	0.370834	0.390751
0.255126	0.326189	0.382747	0.389435
0.268402	0.321892	0.365243	0.394056
0.259197	0.320314	0.373523	0.396339
0.27216	0.324023	0.389778	0.395225
0.264826	0.323763	0.379503	0.387171
0.269155	0.316009	0.378009	0.385758
0.265712	0.327863	0.385607	0.383441
0.259536	0.313032	0.36478	0.391071
0.263935	0.322943	0.375726	0.396722
0.275771	0.323052	0.377557	0.392605
0.258275	0.320611	0.370774	0.393867
0.265508	0.321071	0.37954	0.395731
0.262609	0.315755	0.367297	0.394806
0.258963	0.327351	0.373388	0.39276
0.266105	0.32347	0.375572	0.388535
0.25828	0.310796	0.377476	0.385532
0.260933	0.312841	0.37164	0.398156
0.267729	0.309349	0.368899	0.38774
0.262455	0.317864	0.379593	0.386185
0.260033	0.321178	0.37947	0.389751
0.266564	0.325033	0.373721	0.39995
0.2672	0.3145	0.373773	0.389913
0.259833	0.326968	0.376854	0.390942
0.261396	0.328405	0.380552	0.389511
0.266693	0.32123	0.370635	0.396198
0.265692	0.329867	0.372563	0.386222
0.264979	0.32605	0.37819	0.394868
0.255497	0.312297	0.386121	0.388243
0.26301	0.314657	0.374011	0.395548
0.260226	0.325311	0.37227	0.383558
0.265394	0.315957	0.374681	0.388206
0.267141	0.316169	0.376846	0.398188
0.268065	0.324404	0.392816	0.381552
0.2677	0.321676	0.379026	0.388052
0.260753	0.31833	0.370251	0.392804
0.262236	0.320128	0.371825	0.397486
0.261817	0.317417	0.37833	0.392786
0.270442	0.323461	0.380221	0.395111
0.253336	0.318251	0.385229	0.392163
0.262378	0.320681	0.375041	0.39206
0.257558	0.328374	0.375315	0.399396
0.262238	0.318926	0.383155	0.387283
0.261861	0.326602	0.375103	0.386187
0.26184	0.320589	0.376604	0.390172
0.271331	0.319373	0.383326	0.38469
0.265959	0.314314	0.385372	0.394079
0.265111	0.319695	0.372301	0.387239
0.254479	0.322436	0.386478	0.385932
0.264587	0.32739	0.378447	0.386001
0.25598	0.32772	0.391863	0.39374
0.254672	0.321623	0.372798	0.390741
0.269814	0.309239	0.378162	0.386487
0.257147	0.316747	0.376231	0.39007
0.258379	0.321226	0.377748	0.394181
0.26861	0.319653	0.378274	0.40382
0.253171	0.310242	0.368748	0.387751
0.268192	0.323781	0.376672	0.394323
0.265269	0.317736	0.376738	0.388717
0.265492	0.307501	0.389031	0.379509
0.260471	0.317983	0.375436	0.384701
0.261302	0.320178	0.375491	0.390525
0.263732	0.313839	0.380465	0.38352
0.265345	0.319298	0.3756	0.394292
0.268808	0.322757	0.379216	0.38832
0.258752	0.314132	0.378144	0.404067
0.258573	0.318315	0.379635	0.392502
0.262741	0.325477	0.383024	0.399817
0.264887	0.3146	0.378076	0.385759
0.252275	0.326805	0.385534	0.38893
0.260741	0.320352	0.3758	0.38721
0.258559	0.318275	0.366991	0.387046
0.261008	0.316169	0.368787	0.395589
0.25652	0.315177	0.380341	0.402149
0.253172	0.308808	0.378757	0.394453
0.262774	0.316104	0.387445	0.385759
0.263476	0.317257	0.378091	0.385334
0.265545	0.315367	0.376612	0.39476
0.260566	0.325243	0.375799	0.391807
0.260288	0.318019	0.376715	0.384621
0.261851	0.315417	0.383289	0.393345
0.258853	0.317233	0.384574	0.395099
0.261612	0.311735	0.372811	0.392117
0.265085	0.322307	0.379883	0.378259
0.253824	0.317222	0.364809	0.385772
0.269321	0.320221	0.380047	0.387261
0.25746	0.330576	0.371822	0.392208
0.26533	0.315796	0.375875	0.394432
0.272429	0.326168	0.369748	0.38879
0.255322	0.312487	0.368171	0.386664
0.25573	0.326196	0.371192	0.388539
0.260854	0.309792	0.37082	0.381057
0.263036	0.315333	0.369821	0.395975
0.25784	0.318004	0.369085	0.389528
0.255749	0.313541	0.378991	0.388809
0.267083	0.319722	0.370223	0.38621
0.259041	0.316554	0.3682	0.405501
0.266678	0.312118	0.382104	0.395252
0.260641	0.324312	0.378012	0.395555
0.260934	0.322855	0.368657	0.396247
0.260386	0.309628	0.36488	0.393142
0.263548	0.321149	0.378248	0.381951
0.259756	0.329072	0.376289	0.394318
0.267254	0.32841	0.381729	0.385701
0.267262	0.322631	0.370673	0.389988
0.264943	0.321643	0.373992	0.398485
0.249253	0.309633	0.371526	0.380447
0.253605	0.32149	0.370892	0.388297
0.266344	0.32149	0.371974	0.397
0.27662	0.323344	0.379819	0.385708
0.272553	0.318425	0.37431	0.385485
0.266263	0.316944	0.364517	0.390249
0.263458	0.32538	0.391426	0.386163
0.254057	0.323429	0.37836	0.38577
0.258405	0.317258	0.376229	0.404702
0.270388	0.314614	0.376153	0.392106
0.254026	0.312168	0.37977	0.397583
0.249993	0.321138	0.382344	0.390109
0.262597	0.315282	0.377926	0.37789
0.259087	0.320236	0.372392	0.388351
0.261181	0.32385	0.377156	0.401035
0.260595	0.323553	0.378903	0.390783
0.262007	0.320046	0.373071	0.382087
0.266904	0.326369	0.378481	0.386123
0.257198	0.317584	0.38352	0.392561
0.268059	0.321466	0.382655	0.384627
0.271844	0.320095	0.379827	0.3867
0.259941	0.318127	0.378274	0.389622
0.263569	0.317363	0.381923	0.39537
0.255521	0.318363	0.385503	0.387749
0.261595	0.316754	0.369344	0.390495
0.270028	0.31592	0.382175	0.387082
0.252834	0.321532	0.380898	0.385062
0.255723	0.323118	0.371639	0.390949
0.256534	0.32171	0.381504	0.395405
0.2536	0.328595	0.377729	0.399829
0.26301	0.318531	0.383014	0.39358
0.25735	0.312465	0.379833	0.387959
0.261445	0.316099	0.381823	0.382573
0.264005	0.32008	0.37179	0.4072
0.268438	0.317619	0.380911	0.398607
0.272442	0.304767	0.368394	0.397533
0.265867	0.311996	0.374634	0.391569
0.26447	0.31837	0.375592	0.405623
0.263465	0.310213	0.372382	0.388967
0.25852	0.323215	0.359065	0.380956
0.265838	0.317126	0.376624	0.393601
0.264146	0.322778	0.373786	0.380617
0.266995	0.327716	0.36982	0.389217
0.265602	0.310901	0.380738	0.385029
0.258124	0.320653	0.386851	0.400044
0.261322	0.317554	0.384297	0.389775
0.252511	0.30049	0.372377	0.395599
0.258781	0.317893	0.377891	0.390623
0.269911	0.306407	0.375985	0.39168
0.26281	0.317022	0.372457	0.385073
0.25985	0.315483	0.360531	0.398014
0.262062	0.315321	0.371988	0.382544
0.266478	0.324588	0.371827	0.388039
0.253492	0.307872	0.369751	0.38966
0.267555	0.329818	0.363284	0.392966
0.261886	0.316275	0.375935	0.386863
0.267531	0.318148	0.369995	0.383858
0.268206	0.323054	0.374732	0.385874
0.26737	0.325476	0.381577	0.390135
0.257741	0.321064	0.375266	0.391284
0.255651	0.31384	0.374185	0.381755
0.264487	0.30905	0.377933	0.383741
0.264145	0.318586	0.372675	0.386911
0.264607	0.323237	0.378869	0.387045
0.269993	0.322876	0.379331	0.383902
0.263522	0.321036	0.3729	0.398137
0.26732	0.321266	0.365936	0.396886
0.270081	0.320255	0.375319	0.384334
0.253051	0.320809	0.378808	0.390962
0.26135	0.327121	0.375984	0.395386
0.258078	0.315123	0.384096	0.393792
0.267931	0.314634	0.382074	0.393272
0.25233	0.330909	0.379789	0.395515
0.264329	0.331047	0.37498	0.394133
0.267696	0.324003	0.380463	0.397784
0.259307	0.321189	0.386654	0.389741
0.260427	0.333272	0.377677	0.392796
[truncated: 3,002 more rows]

## Sheet: Figure 4 CIs
95% confidence intervals (95% CI) for the bootstrapped Pearson r between the g-factor derived from ESEM and the g-factor predicted from neuroimaging phenotypes stacked within dwMRI, rsMRI, sMRI, and across all MRI modalities.
Modality	Algorithm	Metric	Mean	Median	Std	CI lower	CI upper
dwMRI	SVR	R2	-0.027	-0.027	0.007	-0.04	-0.014
dwMRI	SVR	r	0.245	0.245	0.006	0.233	0.256
dwMRI	SVR	MSE	0.613	0.613	0.006	0.601	0.624
dwMRI	SVR	MAE	0.62	0.62	0.003	0.614	0.626
dwMRI	eNet	R2	-0.035	-0.035	0.007	-0.048	-0.022
dwMRI	eNet	r	0.224	0.224	0.006	0.213	0.235
dwMRI	eNet	MSE	0.617	0.617	0.006	0.606	0.629
dwMRI	eNet	MAE	0.623	0.623	0.003	0.617	0.629
dwMRI	RF	R2	0.045	0.045	0.005	0.036	0.054
dwMRI	RF	r	0.262	0.262	0.005	0.252	0.273
dwMRI	RF	MSE	0.57	0.57	0.005	0.56	0.58
dwMRI	RF	MAE	0.598	0.598	0.003	0.593	0.604
dwMRI	XGB	R2	0.015	0.015	0.005	0.004	0.026
dwMRI	XGB	r	0.256	0.256	0.006	0.245	0.268
dwMRI	XGB	MSE	0.587	0.588	0.005	0.577	0.598
dwMRI	XGB	MAE	0.607	0.607	0.003	0.601	0.613
rsMRI	SVR	R2	0.055	0.055	0.006	0.043	0.067
rsMRI	SVR	r	0.322	0.322	0.006	0.311	0.333
rsMRI	SVR	MSE	0.562	0.562	0.005	0.552	0.573
rsMRI	SVR	MAE	0.592	0.592	0.003	0.587	0.598
rsMRI	eNet	R2	0.052	0.053	0.007	0.039	0.065
rsMRI	eNet	r	0.319	0.319	0.006	0.308	0.331
rsMRI	eNet	MSE	0.564	0.564	0.006	0.553	0.575
rsMRI	eNet	MAE	0.594	0.594	0.003	0.588	0.599
rsMRI	RF	R2	0.07	0.07	0.006	0.058	0.081
rsMRI	RF	r	0.32	0.32	0.006	0.308	0.331
rsMRI	RF	MSE	0.553	0.553	0.005	0.543	0.563
rsMRI	RF	MAE	0.588	0.588	0.003	0.583	0.594
rsMRI	XGB	R2	0.055	0.055	0.006	0.043	0.067
rsMRI	XGB	r	0.32	0.32	0.006	0.309	0.331
rsMRI	XGB	MSE	0.562	0.562	0.005	0.552	0.572
rsMRI	XGB	MAE	0.593	0.593	0.003	0.587	0.599
sMRI	SVR	R2	0.071	0.07	0.005	0.061	0.08
sMRI	SVR	r	0.296	0.296	0.006	0.284	0.307
sMRI	SVR	MSE	0.552	0.551	0.006	0.541	0.562
sMRI	SVR	MAE	0.586	0.586	0.003	0.581	0.592
sMRI	eNet	R2	0.066	0.066	0.005	0.056	0.076
sMRI	eNet	r	0.292	0.292	0.006	0.28	0.304
sMRI	eNet	MSE	0.554	0.554	0.005	0.544	0.565
sMRI	eNet	MAE	0.59	0.59	0.003	0.584	0.596
sMRI	RF	R2	0.076	0.076	0.004	0.068	0.085
sMRI	RF	r	0.29	0.29	0.006	0.279	0.302
sMRI	RF	MSE	0.548	0.548	0.005	0.537	0.559
sMRI	RF	MAE	0.586	0.586	0.003	0.58	0.592
sMRI	XGB	R2	0.067	0.067	0.005	0.058	0.077
sMRI	XGB	r	0.293	0.293	0.006	0.282	0.305
sMRI	XGB	MSE	0.553	0.553	0.005	0.543	0.564
sMRI	XGB	MAE	0.589	0.589	0.003	0.583	0.595
all MRI	SVR	R2	0.063	0.063	0.008	0.048	0.079
all MRI	SVR	r	0.376	0.376	0.006	0.365	0.387
all MRI	SVR	MSE	0.551	0.551	0.006	0.54	0.563
all MRI	SVR	MAE	0.585	0.585	0.003	0.579	0.592
all MRI	eNet	R2	0.048	0.048	0.008	0.032	0.065
all MRI	eNet	r	0.368	0.368	0.006	0.356	0.38
all MRI	eNet	MSE	0.56	0.56	0.006	0.549	0.572
all MRI	eNet	MAE	0.591	0.591	0.003	0.585	0.598
all MRI	RF	R2	0.122	0.122	0.006	0.111	0.134
all MRI	RF	r	0.376	0.376	0.006	0.364	0.387
all MRI	RF	MSE	0.517	0.517	0.005	0.507	0.527
all MRI	RF	MAE	0.568	0.568	0.003	0.562	0.574
all MRI	XGB	R2	0.093	0.093	0.007	0.078	0.107
all MRI	XGB	r	0.39	0.39	0.006	0.379	0.402
all MRI	XGB	MSE	0.534	0.534	0.005	0.524	0.545
all MRI	XGB	MAE	0.577	0.577	0.003	0.571	0.583
