# Supplementary material for: Multimodal MRI marker of cognition explains the association between cognition and mental health in the UK Biobank
Source: eLife. 2026 May 20;14:RP108109. doi: 10.7554/eLife.108109 (PMC13189626; doi:10.7554/eLife.108109)
Supplement: Figure 5—source data 1. [file elife-108109-fig5-data1.xlsx]

## Sheet: Figure 5 dwMRI
The importance of structural connections (streamline count) between brain regions parcellated using the aparc (Desikan-Killiany) MSA-I atlases for predicting cognition.				Cortical node coordinates. MNI coordinates (x, y, z) for each cortical region used in dwMRI connectome analysis. Region labels follow the Desikan-Killiany atlas nomenclature.
Connection	Correlation with predicted g-factor	p-value		Node	x.mni	y.mni	z.mni	Hemisphere	Type
bankssts-lh-bankssts-lh	0.0261125	2.91961e-05		bankssts-lh	-49.0829	-43.7477	4.03977	left	cortical
bankssts-rh-bankssts-lh	-0.0153227	0.0141934		bankssts-rh	44.9735	-39.5319	6.70967	right	cortical
bankssts-rh-bankssts-rh	-0.013553	0.030078		caudalanteriorcingulate-lh	-5.06507	19.1566	26.3718	left	cortical
caudalanteriorcingulate-lh-bankssts-lh	0.0180927	0.003783		caudalanteriorcingulate-rh	5.71849	19.7103	26.5802	right	cortical
caudalanteriorcingulate-lh-bankssts-rh	-0.0294904	2.35203e-06		caudalmiddlefrontal-lh	-40.7114	14.6415	48.5267	left	cortical
caudalanteriorcingulate-lh-caudalanteriorcingulate-lh	0.00772369	0.216426		caudalmiddlefrontal-rh	41.6134	15.6937	47.7555	right	cortical
caudalanteriorcingulate-rh-bankssts-lh	0.0109717	0.0791031		cuneus-lh	-3.70998	-76.2894	20.1715	left	cortical
caudalanteriorcingulate-rh-bankssts-rh	-0.0280949	6.88905e-06		cuneus-rh	4.25271	-79.0639	21.8295	right	cortical
caudalanteriorcingulate-rh-caudalanteriorcingulate-lh	-0.11405	6.64644e-75		entorhinal-lh	-23.5465	-7.39667	-33.4821	left	cortical
caudalanteriorcingulate-rh-caudalanteriorcingulate-rh	0.0925227	8.22207e-50		entorhinal-rh	24.7641	-6.046	-33.7061	right	cortical
caudalmiddlefrontal-lh-bankssts-lh	0.058192	1.15566e-20		frontalpole-lh	-7.9999	63.1467	-8.53275	left	cortical
caudalmiddlefrontal-lh-bankssts-rh	0.0302337	1.30106e-06		frontalpole-rh	8.72715	62.6909	-10.2108	right	cortical
caudalmiddlefrontal-lh-caudalanteriorcingulate-lh	0.0344233	3.57628e-08		fusiform-lh	-35.2842	-42.7752	-21.5016	left	cortical
caudalmiddlefrontal-lh-caudalanteriorcingulate-rh	0.000510215	0.934923		fusiform-rh	35.2803	-42.9483	-20.4365	right	cortical
caudalmiddlefrontal-lh-caudalmiddlefrontal-lh	0.00155226	0.803812		inferiorparietal-lh	-40.8711	-69.7445	32.0964	left	cortical
caudalmiddlefrontal-rh-bankssts-lh	-0.00728511	0.243657		inferiorparietal-rh	45.5325	-63.8367	30.6034	right	cortical
caudalmiddlefrontal-rh-bankssts-rh	0.0927074	5.27543e-50		inferiortemporal-lh	-54.0057	-37.6921	-26.1723	left	cortical
caudalmiddlefrontal-rh-caudalanteriorcingulate-lh	0.027891	8.02823e-06		inferiortemporal-rh	54.2823	-33.8268	-25.3142	right	cortical
caudalmiddlefrontal-rh-caudalanteriorcingulate-rh	0.0460751	1.61172e-13		insula-lh	-36.5461	-5.5796	3.16048	left	cortical
caudalmiddlefrontal-rh-caudalmiddlefrontal-lh	0.0455879	2.88833e-13		insula-rh	37.4497	-5.65458	2.4049	right	cortical
caudalmiddlefrontal-rh-caudalmiddlefrontal-rh	0.0390099	4.22803e-10		isthmuscingulate-lh	-8.33227	-48.1724	16.8873	left	cortical
cuneus-lh-bankssts-lh	-0.025086	5.93711e-05		isthmuscingulate-rh	8.75948	-46.9033	16.5734	right	cortical
cuneus-lh-bankssts-rh	0.0471936	4.12827e-14		lateraloccipital-lh	-28.7161	-92.7165	-5.82918	left	cortical
cuneus-lh-caudalanteriorcingulate-lh	0.0397145	2.04054e-10		lateraloccipital-rh	29.7619	-92.2743	-2.45086	right	cortical
cuneus-lh-caudalanteriorcingulate-rh	0.0249661	6.43939e-05		lateralorbitofrontal-lh	-26.6973	28.5731	-13.8412	left	cortical
cuneus-lh-caudalmiddlefrontal-lh	0.0276696	9.46828e-06		lateralorbitofrontal-rh	22.2346	28.1305	-12.0978	right	cortical
cuneus-lh-caudalmiddlefrontal-rh	0.000557131	0.928954		lingual-lh	-12.6938	-71.493	-3.41687	left	cortical
cuneus-lh-cuneus-lh	0.0310129	6.89222e-07		lingual-rh	9.76398	-69.1717	-2.41686	right	cortical
cuneus-rh-bankssts-lh	0.0151299	0.0154582		medialorbitofrontal-lh	-5.13164	37.2453	-20.3433	left	cortical
cuneus-rh-bankssts-rh	0.0678104	1.6996e-27		medialorbitofrontal-rh	7.17578	38.4672	-18.416	right	cortical
cuneus-rh-caudalanteriorcingulate-lh	0.0474378	3.05375e-14		middletemporal-lh	-63.5689	-31.3593	-12.9306	left	cortical
cuneus-rh-caudalanteriorcingulate-rh	-0.0807444	2.56881e-38		middletemporal-rh	65.6263	-28.1529	-12.9889	right	cortical
cuneus-rh-caudalmiddlefrontal-lh	0.0500872	1.05069e-15		paracentral-lh	-5.70417	-29.8742	53.8066	left	cortical
cuneus-rh-caudalmiddlefrontal-rh	0.0269101	1.65214e-05		paracentral-rh	6.16721	-28.084	53.3484	right	cortical
cuneus-rh-cuneus-lh	-0.0275964	9.9965e-06		parahippocampal-lh	-24.1846	-32.6107	-19.1544	left	cortical
cuneus-rh-cuneus-rh	0.0049826	0.425218		parahippocampal-rh	25.4712	-32.2879	-17.5285	right	cortical
entorhinal-lh-bankssts-lh	0.0275893	1.00491e-05		parsopercularis-lh	-52.4982	15.9508	12.7082	left	cortical
entorhinal-lh-bankssts-rh	0.00830717	0.183694		parsopercularis-rh	54.0239	14.9595	14.2502	right	cortical
entorhinal-lh-caudalanteriorcingulate-lh	0.0156715	0.0121362		parsorbitalis-lh	-41.7806	39.921	-13.3317	left	cortical
entorhinal-lh-caudalanteriorcingulate-rh	0.0164477	0.00847831		parsorbitalis-rh	44.1346	40.7363	-13.3475	right	cortical
entorhinal-lh-caudalmiddlefrontal-lh	0.0130459	0.0368062		parstriangularis-lh	-45.5907	29.8977	-0.397651	left	cortical
entorhinal-lh-caudalmiddlefrontal-rh	-0.0109496	0.0797071		parstriangularis-rh	50.5011	28.3218	1.58283	right	cortical
entorhinal-lh-cuneus-lh	-0.027174	1.36377e-05		pericalcarine-lh	-13.7857	-82.2035	10.1876	left	cortical
entorhinal-lh-cuneus-rh	0.0176414	0.00475056		pericalcarine-rh	15.7461	-80.9832	9.18856	right	cortical
entorhinal-lh-entorhinal-lh	0.0168144	0.00712159		postcentral-lh	-50.7598	-17.7745	50.8347	left	cortical
entorhinal-rh-bankssts-lh	0.00490989	0.432006		postcentral-rh	50.3687	-15.8385	51.0239	right	cortical
entorhinal-rh-bankssts-rh	0.0320456	2.90114e-07		posteriorcingulate-lh	-4.09291	-17.4773	38.0376	left	cortical
entorhinal-rh-caudalanteriorcingulate-lh	-0.0388406	5.02763e-10		posteriorcingulate-rh	4.43525	-16.6981	37.978	right	cortical
entorhinal-rh-caudalanteriorcingulate-rh	0.074462	7.94997e-33		precentral-lh	-47.9534	-9.75983	48.7042	left	cortical
entorhinal-rh-caudalmiddlefrontal-lh	0.0196354	0.00167413		precentral-rh	45.9129	-6.97476	51.7655	right	cortical
entorhinal-rh-caudalmiddlefrontal-rh	0.0390745	3.95698e-10		precuneus-lh	-7.318	-58.5741	36.3972	left	cortical
entorhinal-rh-cuneus-lh	0.0375102	1.91213e-09		precuneus-rh	9.02229	-58.0821	37.3148	right	cortical
entorhinal-rh-cuneus-rh	0.0405018	8.9088e-11		rostralanteriorcingulate-lh	-7.03762	36.35	0.0128179	left	cortical
entorhinal-rh-entorhinal-lh	0.0201663	0.00124804		rostralanteriorcingulate-rh	7.36364	35.8497	0.414157	right	cortical
entorhinal-rh-entorhinal-rh	0.0164843	0.00833322		rostralmiddlefrontal-lh	-34.5277	45.3817	18.7606	left	cortical
frontalpole-lh-bankssts-lh	0.0243351	9.81704e-05		rostralmiddlefrontal-rh	33.6312	44.7596	19.7569	right	cortical
frontalpole-lh-bankssts-rh	0.00194715	0.755334		superiorfrontal-lh	-6.83482	30.3792	52.3489	left	cortical
frontalpole-lh-caudalanteriorcingulate-lh	0.074629	5.75588e-33		superiorfrontal-rh	6.84077	32.3437	52.7113	right	cortical
frontalpole-lh-caudalanteriorcingulate-rh	0.0388012	5.23396e-10		superiorparietal-lh	-23.1548	-62.11	52.2798	left	cortical
frontalpole-lh-caudalmiddlefrontal-lh	0.0602433	4.92222e-22		superiorparietal-rh	20.8366	-58.8362	53.0641	right	cortical
frontalpole-lh-caudalmiddlefrontal-rh	0.0312981	5.44181e-07		superiortemporal-lh	-61.3594	-12.9416	0.387139	left	cortical
frontalpole-lh-cuneus-lh	0.0359149	8.94905e-09		superiortemporal-rh	62.6467	-7.2418	-1.76214	right	cortical
frontalpole-lh-cuneus-rh	-0.0128311	0.0400222		supramarginal-lh	-57.2678	-38.4287	36.9171	left	cortical
frontalpole-lh-entorhinal-lh	-0.00368516	0.555352		supramarginal-rh	57.7358	-32.7521	37.3037	right	cortical
frontalpole-lh-entorhinal-rh	0.0221628	0.000389235		temporalpole-lh	-29.6738	12.6378	-36.7815	left	cortical
frontalpole-lh-frontalpole-lh	-0.0285674	4.81372e-06		temporalpole-rh	30.9393	12.2419	-35.1358	right	cortical
frontalpole-rh-bankssts-lh	0.0403323	1.06622e-10		transversetemporal-lh	-44.4913	-23.6983	8.14447	left	cortical
frontalpole-rh-bankssts-rh	0.014413	0.0210708		transversetemporal-rh	44.9263	-22.0733	7.79601	right	cortical
frontalpole-rh-caudalanteriorcingulate-lh	-0.0237847	0.000140698		HIP-rh	27.1908	-22.1815	-14.1385	right	subcortical
frontalpole-rh-caudalanteriorcingulate-rh	-0.0335983	7.5129e-08		AMY-rh	24.1657	-3.74857	-18.6629	right	subcortical
frontalpole-rh-caudalmiddlefrontal-lh	-0.0573385	4.16215e-20		pTHA-rh	15.4057	-26.9147	2.81137	right	subcortical
frontalpole-rh-caudalmiddlefrontal-rh	-0.0249034	6.71805e-05		aTHA-rh	9.98157	-14.6083	8.64286	right	subcortical
frontalpole-rh-cuneus-lh	0.0273313	1.21543e-05		NAc-rh	12.7379	14.2718	-5.1068	right	subcortical
frontalpole-rh-cuneus-rh	-0.00970363	0.120431		GP-rh	20.1212	-3.81818	-1.69697	right	subcortical
frontalpole-rh-entorhinal-lh	0.0226541	0.000287924		PUT-rh	26.7862	0.44098	0.835189	right	subcortical
frontalpole-rh-entorhinal-rh	-0.0346752	2.84135e-08		CAU-rh	13.9172	10.7264	10.0092	right	subcortical
frontalpole-rh-frontalpole-lh	0.00452481	0.468983		HIP-lh	-25.1908	-22.1815	-14.1385	lh	subcortical
frontalpole-rh-frontalpole-rh	-0.0106602	0.0879964		AMY-lh	-22.1657	-3.74857	-18.6629	lh	subcortical
fusiform-lh-bankssts-lh	0.0961586	1.11865e-53		pTHA-lh	-13.4057	-26.9147	2.81137	lh	subcortical
fusiform-lh-bankssts-rh	0.127109	1.00323e-92		aTHA-lh	-7.98157	-14.6083	8.64286	lh	subcortical
fusiform-lh-caudalanteriorcingulate-lh	0.054128	4.36803e-18		NAc-lh	-10.7379	14.2718	-5.1068	lh	subcortical
fusiform-lh-caudalanteriorcingulate-rh	0.0154304	0.0135278		GP-lh	-18.1212	-3.81818	-1.69697	lh	subcortical
fusiform-lh-caudalmiddlefrontal-lh	0.0346139	3.00518e-08		PUT-lh	-24.7862	0.44098	0.835189	lh	subcortical
fusiform-lh-caudalmiddlefrontal-rh	0.084246	1.43355e-41		CAU-lh	-11.9172	10.7264	10.0092	lh	subcortical
fusiform-lh-cuneus-lh	-0.0515621	1.49024e-16
fusiform-lh-cuneus-rh	-0.0731153	1.0459e-31
fusiform-lh-entorhinal-lh	0.00973834	0.11911
fusiform-lh-entorhinal-rh	-0.00679699	0.276694
fusiform-lh-frontalpole-lh	0.109797	1.59167e-69
fusiform-lh-frontalpole-rh	0.033488	8.28597e-08
fusiform-lh-fusiform-lh	0.0251017	5.87425e-05
fusiform-rh-bankssts-lh	-0.00433145	0.48819
fusiform-rh-bankssts-rh	0.0956871	3.6188e-53
fusiform-rh-caudalanteriorcingulate-lh	0.0754232	1.22769e-33
fusiform-rh-caudalanteriorcingulate-rh	0.102151	2.22647e-60
fusiform-rh-caudalmiddlefrontal-lh	0.0151151	0.0155592
fusiform-rh-caudalmiddlefrontal-rh	-0.00150557	0.809597
fusiform-rh-cuneus-lh	0.0160626	0.0101477
fusiform-rh-cuneus-rh	-0.0606443	2.62267e-22
fusiform-rh-entorhinal-lh	-0.0111321	0.0748147
fusiform-rh-entorhinal-rh	0.0187652	0.00267006
fusiform-rh-frontalpole-lh	0.00535981	0.39102
fusiform-rh-frontalpole-rh	0.0674577	3.15576e-27
fusiform-rh-fusiform-lh	-0.0234863	0.000170473
fusiform-rh-fusiform-rh	0.0566882	1.09125e-19
inferiorparietal-lh-bankssts-lh	-0.0525927	3.68398e-17
inferiorparietal-lh-bankssts-rh	0.0486968	6.29667e-15
inferiorparietal-lh-caudalanteriorcingulate-lh	-0.0499346	1.28187e-15
inferiorparietal-lh-caudalanteriorcingulate-rh	0.00236939	0.704548
inferiorparietal-lh-caudalmiddlefrontal-lh	0.000509181	0.935054
inferiorparietal-lh-caudalmiddlefrontal-rh	-0.0383249	8.48301e-10
inferiorparietal-lh-cuneus-lh	-0.0175636	0.0049384
inferiorparietal-lh-cuneus-rh	-0.0535577	9.71139e-18
inferiorparietal-lh-entorhinal-lh	-0.0345619	3.15168e-08
inferiorparietal-lh-entorhinal-rh	0.0480181	1.48229e-14
inferiorparietal-lh-frontalpole-lh	-0.0129068	0.0388623
inferiorparietal-lh-frontalpole-rh	0.0386606	6.03965e-10
inferiorparietal-lh-fusiform-lh	-0.0337241	6.71644e-08
inferiorparietal-lh-fusiform-rh	-0.0267939	1.79678e-05
inferiorparietal-lh-inferiorparietal-lh	-0.0646951	3.60016e-25
inferiorparietal-rh-bankssts-lh	-0.0193237	0.00198289
inferiorparietal-rh-bankssts-rh	-0.0109995	0.0783444
inferiorparietal-rh-caudalanteriorcingulate-lh	0.00647482	0.300102
inferiorparietal-rh-caudalanteriorcingulate-rh	-0.0323878	2.1651e-07
inferiorparietal-rh-caudalmiddlefrontal-lh	-0.0623562	1.70375e-23
inferiorparietal-rh-caudalmiddlefrontal-rh	-0.0326748	1.69012e-07
inferiorparietal-rh-cuneus-lh	0.0283517	5.67352e-06
inferiorparietal-rh-cuneus-rh	0.0251972	5.50472e-05
inferiorparietal-rh-entorhinal-lh	-0.000585659	0.925326
inferiorparietal-rh-entorhinal-rh	0.0220915	0.00040643
inferiorparietal-rh-frontalpole-lh	-0.0624084	1.56558e-23
inferiorparietal-rh-frontalpole-rh	0.0535471	9.85616e-18
inferiorparietal-rh-fusiform-lh	-0.0758196	5.64291e-34
inferiorparietal-rh-fusiform-rh	-0.0538815	6.17581e-18
inferiorparietal-rh-inferiorparietal-lh	0.0229836	0.000234431
inferiorparietal-rh-inferiorparietal-rh	-0.0294169	2.49197e-06
inferiortemporal-lh-bankssts-lh	0.011465	0.0665235
inferiortemporal-lh-bankssts-rh	-0.0286688	4.45409e-06
inferiortemporal-lh-caudalanteriorcingulate-lh	-0.0245611	8.45061e-05
inferiortemporal-lh-caudalanteriorcingulate-rh	-0.0362147	6.7291e-09
inferiortemporal-lh-caudalmiddlefrontal-lh	-0.0450575	5.41422e-13
inferiortemporal-lh-caudalmiddlefrontal-rh	0.0422593	1.32362e-11
inferiortemporal-lh-cuneus-lh	-0.0184973	0.0030715
inferiortemporal-lh-cuneus-rh	-0.0395452	2.43362e-10
inferiortemporal-lh-entorhinal-lh	-0.0200865	0.001305
inferiortemporal-lh-entorhinal-rh	-0.0411073	4.65951e-11
inferiortemporal-lh-frontalpole-lh	-0.073114	1.04865e-31
inferiortemporal-lh-frontalpole-rh	0.0234138	0.000178563
inferiortemporal-lh-fusiform-lh	-0.00642269	0.30401
inferiortemporal-lh-fusiform-rh	0.00335292	0.591552
inferiortemporal-lh-inferiorparietal-lh	-0.0134888	0.0308669
inferiortemporal-lh-inferiorparietal-rh	-0.0357126	1.08347e-08
inferiortemporal-lh-inferiortemporal-lh	-0.110194	5.11007e-70
inferiortemporal-rh-bankssts-lh	-0.0560347	2.84331e-19
inferiortemporal-rh-bankssts-rh	-0.0551736	9.87666e-19
inferiortemporal-rh-caudalanteriorcingulate-lh	0.0882371	1.90196e-45
inferiortemporal-rh-caudalanteriorcingulate-rh	-0.10684	6.58279e-66
inferiortemporal-rh-caudalmiddlefrontal-lh	-0.0428097	7.16967e-12
inferiortemporal-rh-caudalmiddlefrontal-rh	-0.0202313	0.00120341
inferiortemporal-rh-cuneus-lh	-0.0497843	1.55841e-15
inferiortemporal-rh-cuneus-rh	-0.0429915	5.84532e-12
inferiortemporal-rh-entorhinal-lh	-0.0205607	0.000999043
inferiortemporal-rh-entorhinal-rh	-0.0160564	0.0101768
inferiortemporal-rh-frontalpole-lh	0.0449459	6.17347e-13
inferiortemporal-rh-frontalpole-rh	-0.0581189	1.29059e-20
inferiortemporal-rh-fusiform-lh	0.00483914	0.43867
inferiortemporal-rh-fusiform-rh	0.00229962	0.712857
inferiortemporal-rh-inferiorparietal-lh	-0.010183	0.103166
inferiortemporal-rh-inferiorparietal-rh	0.0273765	1.17568e-05
inferiortemporal-rh-inferiortemporal-lh	0.0209281	0.000809245
inferiortemporal-rh-inferiortemporal-rh	-0.0189072	0.00247729
insula-lh-bankssts-lh	0.133004	2.03125e-101
insula-lh-bankssts-rh	-0.0579134	1.75952e-20
insula-lh-caudalanteriorcingulate-lh	-0.00358977	0.565633
insula-lh-caudalanteriorcingulate-rh	0.0956585	3.88552e-53
insula-lh-caudalmiddlefrontal-lh	-0.02697	1.58194e-05
insula-lh-caudalmiddlefrontal-rh	0.062251	2.01977e-23
insula-lh-cuneus-lh	-0.0227066	0.000278687
insula-lh-cuneus-rh	-0.0387723	5.39035e-10
insula-lh-entorhinal-lh	0.154892	2.81336e-137
insula-lh-entorhinal-rh	0.065766	5.87472e-26
insula-lh-frontalpole-lh	0.0374107	2.10946e-09
insula-lh-frontalpole-rh	-0.0563781	1.7215e-19
insula-lh-fusiform-lh	-0.0169229	0.00675946
insula-lh-fusiform-rh	0.0456813	2.58411e-13
insula-lh-inferiorparietal-lh	-0.00900401	0.149586
insula-lh-inferiorparietal-rh	-0.0280752	6.99232e-06
insula-lh-inferiortemporal-lh	0.00346984	0.578689
insula-lh-inferiortemporal-rh	0.140541	3.9668e-113
insula-lh-insula-lh	-0.00118974	0.848995
insula-rh-bankssts-lh	-0.00983754	0.115395
insula-rh-bankssts-rh	0.0180888	0.00379052
insula-rh-caudalanteriorcingulate-lh	0.107396	1.40055e-66
insula-rh-caudalanteriorcingulate-rh	-0.0554338	6.79341e-19
insula-rh-caudalmiddlefrontal-lh	-0.0380428	1.12614e-09
insula-rh-caudalmiddlefrontal-rh	-0.0359244	8.86882e-09
insula-rh-cuneus-lh	-0.12017	5.22397e-83
insula-rh-cuneus-rh	0.0716636	1.59654e-30
insula-rh-entorhinal-lh	0.017708	0.00459492
insula-rh-entorhinal-rh	0.0167514	0.00733977
insula-rh-frontalpole-lh	0.0110877	0.0759821
insula-rh-frontalpole-rh	0.13287	3.23234e-101
insula-rh-fusiform-lh	0.0279946	7.42896e-06
insula-rh-fusiform-rh	0.0272274	1.31153e-05
insula-rh-inferiorparietal-lh	-0.0101764	0.103391
insula-rh-inferiorparietal-rh	0.0876831	6.7333e-45
insula-rh-inferiortemporal-lh	-0.00363672	0.560562
insula-rh-inferiortemporal-rh	0.0647008	3.56562e-25
insula-rh-insula-lh	0.0903422	1.45057e-47
insula-rh-insula-rh	0.0740193	1.8642e-32
isthmuscingulate-lh-bankssts-lh	0.0538144	6.78428e-18
isthmuscingulate-lh-bankssts-rh	0.0188833	0.00250883
isthmuscingulate-lh-caudalanteriorcingulate-lh	0.0139001	0.0261068
isthmuscingulate-lh-caudalanteriorcingulate-rh	0.170188	1.00305e-165
isthmuscingulate-lh-caudalmiddlefrontal-lh	0.101862	4.78561e-60
isthmuscingulate-lh-caudalmiddlefrontal-rh	0.0893635	1.42024e-46
isthmuscingulate-lh-cuneus-lh	0.0724146	3.92486e-31
isthmuscingulate-lh-cuneus-rh	0.068395	6.04974e-28
isthmuscingulate-lh-entorhinal-lh	0.048391	9.27322e-15
isthmuscingulate-lh-entorhinal-rh	0.0991481	5.7153e-57
isthmuscingulate-lh-frontalpole-lh	0.0906308	7.36692e-48
isthmuscingulate-lh-frontalpole-rh	0.108838	2.43104e-68
isthmuscingulate-lh-fusiform-lh	0.15748	6.80915e-142
isthmuscingulate-lh-fusiform-rh	0.0291596	3.0477e-06
isthmuscingulate-lh-inferiorparietal-lh	0.0812035	9.79628e-39
isthmuscingulate-lh-inferiorparietal-rh	0.169448	2.77888e-164
isthmuscingulate-lh-inferiortemporal-lh	0.139815	5.68868e-112
isthmuscingulate-lh-inferiortemporal-rh	0.0700161	3.29464e-29
isthmuscingulate-lh-insula-lh	0.0288073	4.00443e-06
isthmuscingulate-lh-insula-rh	0.0218295	0.000475992
isthmuscingulate-lh-isthmuscingulate-lh	0.0245802	8.34369e-05
isthmuscingulate-rh-bankssts-lh	0.0760488	3.59305e-34
isthmuscingulate-rh-bankssts-rh	0.0615194	6.54486e-23
isthmuscingulate-rh-caudalanteriorcingulate-lh	0.0508404	3.90218e-16
isthmuscingulate-rh-caudalanteriorcingulate-rh	-0.0814153	6.26852e-39
isthmuscingulate-rh-caudalmiddlefrontal-lh	0.0148083	0.0177883
isthmuscingulate-rh-caudalmiddlefrontal-rh	0.0130267	0.0370848
isthmuscingulate-rh-cuneus-lh	0.0417187	2.39922e-11
isthmuscingulate-rh-cuneus-rh	0.0108585	0.0822462
isthmuscingulate-rh-entorhinal-lh	0.0415109	3.00967e-11
isthmuscingulate-rh-entorhinal-rh	-0.0363497	5.9135e-09
isthmuscingulate-rh-frontalpole-lh	0.0285795	4.76956e-06
isthmuscingulate-rh-frontalpole-rh	-0.0633875	3.1644e-24
isthmuscingulate-rh-fusiform-lh	0.0895085	1.01462e-46
isthmuscingulate-rh-fusiform-rh	0.0548247	1.62721e-18
isthmuscingulate-rh-inferiorparietal-lh	0.0154254	0.0135578
isthmuscingulate-rh-inferiorparietal-rh	0.0198818	0.00146204
isthmuscingulate-rh-inferiortemporal-lh	0.0382804	8.87235e-10
isthmuscingulate-rh-inferiortemporal-rh	0.0134684	0.0311211
isthmuscingulate-rh-insula-lh	-0.00666936	0.285814
isthmuscingulate-rh-insula-rh	-0.0108489	0.0825169
isthmuscingulate-rh-isthmuscingulate-lh	-0.0462418	1.31833e-13
isthmuscingulate-rh-isthmuscingulate-rh	-0.00913304	0.143839
lateraloccipital-lh-bankssts-lh	-0.0450098	5.72663e-13
lateraloccipital-lh-bankssts-rh	-0.0616999	4.90265e-23
lateraloccipital-lh-caudalanteriorcingulate-lh	-0.00659393	0.291299
lateraloccipital-lh-caudalanteriorcingulate-rh	0.0484582	8.5195e-15
lateraloccipital-lh-caudalmiddlefrontal-lh	-0.0512121	2.38094e-16
lateraloccipital-lh-caudalmiddlefrontal-rh	0.0196565	0.00165488
lateraloccipital-lh-cuneus-lh	-0.0478473	1.83522e-14
lateraloccipital-lh-cuneus-rh	0.00477165	0.445082
lateraloccipital-lh-entorhinal-lh	0.00460002	0.461626
lateraloccipital-lh-entorhinal-rh	0.0948308	3.0066e-52
lateraloccipital-lh-frontalpole-lh	0.0634605	2.80599e-24
lateraloccipital-lh-frontalpole-rh	0.11655	3.67174e-78
lateraloccipital-lh-fusiform-lh	-0.0332253	1.04509e-07
lateraloccipital-lh-fusiform-rh	0.0183037	0.00339506
lateraloccipital-lh-inferiorparietal-lh	-0.0133094	0.0331649
lateraloccipital-lh-inferiorparietal-rh	0.0338196	6.16656e-08
lateraloccipital-lh-inferiortemporal-lh	-0.0570786	6.12589e-20
lateraloccipital-lh-inferiortemporal-rh	0.00857119	0.17015
lateraloccipital-lh-insula-lh	0.120731	8.97105e-84
lateraloccipital-lh-insula-rh	0.0652872	1.32605e-25
lateraloccipital-lh-isthmuscingulate-lh	0.0103806	0.096649
lateraloccipital-lh-isthmuscingulate-rh	0.012266	0.0496381
lateraloccipital-lh-lateraloccipital-lh	0.0157336	0.011799
lateraloccipital-rh-bankssts-lh	0.0568989	7.99469e-20
lateraloccipital-rh-bankssts-rh	-0.076841	7.47253e-35
lateraloccipital-rh-caudalanteriorcingulate-lh	0.0431756	4.74961e-12
lateraloccipital-rh-caudalanteriorcingulate-rh	0.0312974	5.44461e-07
lateraloccipital-rh-caudalmiddlefrontal-lh	-0.0136321	0.0291302
lateraloccipital-rh-caudalmiddlefrontal-rh	0.0355028	1.31957e-08
lateraloccipital-rh-cuneus-lh	0.0341348	4.64523e-08
lateraloccipital-rh-cuneus-rh	0.0385629	6.66932e-10
lateraloccipital-rh-entorhinal-lh	0.0266467	1.99737e-05
lateraloccipital-rh-entorhinal-rh	0.0503317	7.63014e-16
lateraloccipital-rh-frontalpole-lh	0.0570747	6.16188e-20
lateraloccipital-rh-frontalpole-rh	0.0396743	2.12797e-10
lateraloccipital-rh-fusiform-lh	-0.0222762	0.000363264
lateraloccipital-rh-fusiform-rh	0.0796719	2.39106e-37
lateraloccipital-rh-inferiorparietal-lh	0.020329	0.00113907
lateraloccipital-rh-inferiorparietal-rh	0.0734031	6.05422e-32
lateraloccipital-rh-inferiortemporal-lh	0.0229817	0.000234711
lateraloccipital-rh-inferiortemporal-rh	-0.00709545	0.256148
lateraloccipital-rh-insula-lh	0.0303621	1.17302e-06
lateraloccipital-rh-insula-rh	0.00838867	0.17943
lateraloccipital-rh-isthmuscingulate-lh	0.0453779	3.70753e-13
lateraloccipital-rh-isthmuscingulate-rh	0.0401213	1.33239e-10
lateraloccipital-rh-lateraloccipital-lh	0.0439588	1.94484e-12
lateraloccipital-rh-lateraloccipital-rh	0.0575559	3.00835e-20
lateralorbitofrontal-lh-bankssts-lh	0.0155153	0.0130227
lateralorbitofrontal-lh-bankssts-rh	0.00402965	0.518998
lateralorbitofrontal-lh-caudalanteriorcingulate-lh	0.0261425	2.85848e-05
lateralorbitofrontal-lh-caudalanteriorcingulate-rh	0.148819	9.26812e-127
lateralorbitofrontal-lh-caudalmiddlefrontal-lh	0.0376011	1.74789e-09
lateralorbitofrontal-lh-caudalmiddlefrontal-rh	0.0487481	5.89908e-15
lateralorbitofrontal-lh-cuneus-lh	0.0520354	7.86964e-17
lateralorbitofrontal-lh-cuneus-rh	0.127547	2.34119e-93
lateralorbitofrontal-lh-entorhinal-lh	0.00516461	0.408504
lateralorbitofrontal-lh-entorhinal-rh	0.0218312	0.000475484
lateralorbitofrontal-lh-frontalpole-lh	0.0182427	0.00350333
lateralorbitofrontal-lh-frontalpole-rh	-0.0528441	2.60873e-17
lateralorbitofrontal-lh-fusiform-lh	0.0302611	1.27273e-06
lateralorbitofrontal-lh-fusiform-rh	0.0024238	0.698093
lateralorbitofrontal-lh-inferiorparietal-lh	0.00943621	0.131001
lateralorbitofrontal-lh-inferiorparietal-rh	-0.0615327	6.4066e-23
lateralorbitofrontal-lh-inferiortemporal-lh	0.00199193	0.749893
lateralorbitofrontal-lh-inferiortemporal-rh	0.000120726	0.984585
lateralorbitofrontal-lh-insula-lh	0.0495551	2.09691e-15
lateralorbitofrontal-lh-insula-rh	0.012229	0.0503291
lateralorbitofrontal-lh-isthmuscingulate-lh	0.0397206	2.02757e-10
lateralorbitofrontal-lh-isthmuscingulate-rh	-0.0220283	0.000422285
lateralorbitofrontal-lh-lateraloccipital-lh	-0.0137661	0.0275827
lateralorbitofrontal-lh-lateraloccipital-rh	-0.0345058	3.31722e-08
lateralorbitofrontal-lh-lateralorbitofrontal-lh	0.0798759	1.56774e-37
lateralorbitofrontal-rh-bankssts-lh	0.0720233	8.16721e-31
lateralorbitofrontal-rh-bankssts-rh	0.0677052	2.04479e-27
lateralorbitofrontal-rh-caudalanteriorcingulate-lh	0.0253944	4.80989e-05
lateralorbitofrontal-rh-caudalanteriorcingulate-rh	0.09229	1.43663e-49
lateralorbitofrontal-rh-caudalmiddlefrontal-lh	0.0393108	3.10233e-10
lateralorbitofrontal-rh-caudalmiddlefrontal-rh	0.0263881	2.4024e-05
lateralorbitofrontal-rh-cuneus-lh	0.0709166	6.35411e-30
lateralorbitofrontal-rh-cuneus-rh	0.0143278	0.0218438
lateralorbitofrontal-rh-entorhinal-lh	0.0307193	8.77197e-07
lateralorbitofrontal-rh-entorhinal-rh	-0.0808094	2.24225e-38
lateralorbitofrontal-rh-frontalpole-lh	0.0494442	2.41953e-15
lateralorbitofrontal-rh-frontalpole-rh	0.102579	7.14719e-61
lateralorbitofrontal-rh-fusiform-lh	0.0776382	1.51365e-35
lateralorbitofrontal-rh-fusiform-rh	0.0363932	5.67222e-09
lateralorbitofrontal-rh-inferiorparietal-lh	-0.0094395	0.130867
lateralorbitofrontal-rh-inferiorparietal-rh	0.050114	1.01461e-15
lateralorbitofrontal-rh-inferiortemporal-lh	0.0733319	6.93292e-32
lateralorbitofrontal-rh-inferiortemporal-rh	0.0947126	4.02152e-52
lateralorbitofrontal-rh-insula-lh	0.0873927	1.30194e-44
lateralorbitofrontal-rh-insula-rh	0.109453	4.2403e-69
lateralorbitofrontal-rh-isthmuscingulate-lh	0.0871861	2.07849e-44
lateralorbitofrontal-rh-isthmuscingulate-rh	0.108237	1.32542e-67
lateralorbitofrontal-rh-lateraloccipital-lh	-0.0318064	3.55336e-07
lateralorbitofrontal-rh-lateraloccipital-rh	0.117526	1.87039e-79
lateralorbitofrontal-rh-lateralorbitofrontal-lh	-0.00479488	0.442869
lateralorbitofrontal-rh-lateralorbitofrontal-rh	0.0100102	0.109148
lingual-lh-bankssts-lh	0.11747	2.22215e-79
lingual-lh-bankssts-rh	0.0713532	2.83901e-30
lingual-lh-caudalanteriorcingulate-lh	-0.0257398	3.78919e-05
lingual-lh-caudalanteriorcingulate-rh	0.0120598	0.053599
lingual-lh-caudalmiddlefrontal-lh	0.0320288	2.94275e-07
lingual-lh-caudalmiddlefrontal-rh	0.0795645	2.98428e-37
lingual-lh-cuneus-lh	0.0101848	0.103107
lingual-lh-cuneus-rh	-0.0251117	5.83429e-05
lingual-lh-entorhinal-lh	0.105828	1.07985e-64
lingual-lh-entorhinal-rh	0.00768073	0.218993
lingual-lh-frontalpole-lh	0.017401	0.00535288
lingual-lh-frontalpole-rh	0.0419161	1.93256e-11
lingual-lh-fusiform-lh	-0.0153688	0.0139049
lingual-lh-fusiform-rh	0.0143541	0.0216019
lingual-lh-inferiorparietal-lh	0.0422663	1.31343e-11
lingual-lh-inferiorparietal-rh	0.060595	2.83434e-22
lingual-lh-inferiortemporal-lh	0.0300635	1.49177e-06
lingual-lh-inferiortemporal-rh	-0.0570498	6.39333e-20
lingual-lh-insula-lh	0.0048457	0.43805
lingual-lh-insula-rh	0.022273	0.000363968
lingual-lh-isthmuscingulate-lh	0.0246681	7.86828e-05
lingual-lh-isthmuscingulate-rh	0.0529141	2.36927e-17
lingual-lh-lateraloccipital-lh	0.0150115	0.0162827
lingual-lh-lateraloccipital-rh	0.0144677	0.0205868
lingual-lh-lateralorbitofrontal-lh	0.0512583	2.23844e-16
lingual-lh-lateralorbitofrontal-rh	0.0321936	2.55716e-07
lingual-lh-lingual-lh	0.0211642	0.000705572
lingual-rh-bankssts-lh	0.0301083	1.4392e-06
lingual-rh-bankssts-rh	0.00953955	0.126834
lingual-rh-caudalanteriorcingulate-lh	0.0373641	2.20846e-09
lingual-rh-caudalanteriorcingulate-rh	0.0268743	1.69541e-05
lingual-rh-caudalmiddlefrontal-lh	0.0486751	6.47223e-15
lingual-rh-caudalmiddlefrontal-rh	0.121683	4.43522e-85
lingual-rh-cuneus-lh	0.0370312	3.05995e-09
lingual-rh-cuneus-rh	0.0647116	3.50203e-25
lingual-rh-entorhinal-lh	0.0705085	1.34311e-29
lingual-rh-entorhinal-rh	0.0650233	2.07186e-25
lingual-rh-frontalpole-lh	0.0415547	2.86932e-11
lingual-rh-frontalpole-rh	0.036181	6.94855e-09
lingual-rh-fusiform-lh	0.0348917	2.32869e-08
lingual-rh-fusiform-rh	0.021916	0.000451881
lingual-rh-inferiorparietal-lh	0.0227324	0.000274255
lingual-rh-inferiorparietal-rh	0.0557368	4.38387e-19
lingual-rh-inferiortemporal-lh	0.0296656	2.04829e-06
lingual-rh-inferiortemporal-rh	0.0293162	2.69675e-06
lingual-rh-insula-lh	0.00318677	0.610052
lingual-rh-insula-rh	0.0235795	0.000160594
lingual-rh-isthmuscingulate-lh	0.0757396	6.6029e-34
lingual-rh-isthmuscingulate-rh	0.0368199	3.75813e-09
lingual-rh-lateraloccipital-lh	0.0600834	6.31977e-22
lingual-rh-lateraloccipital-rh	0.0163935	0.00869731
lingual-rh-lateralorbitofrontal-lh	0.0433543	3.87943e-12
lingual-rh-lateralorbitofrontal-rh	0.128726	4.544e-95
lingual-rh-lingual-lh	0.129941	7.50381e-97
lingual-rh-lingual-rh	0.0974027	4.91214e-55
medialorbitofrontal-lh-bankssts-lh	0.0804377	4.87713e-38
medialorbitofrontal-lh-bankssts-rh	0.000201172	0.974317
medialorbitofrontal-lh-caudalanteriorcingulate-lh	0.0835506	6.50991e-41
medialorbitofrontal-lh-caudalanteriorcingulate-rh	0.112705	3.52462e-73
medialorbitofrontal-lh-caudalmiddlefrontal-lh	0.07405	1.75749e-32
medialorbitofrontal-lh-caudalmiddlefrontal-rh	-0.0617028	4.88048e-23
medialorbitofrontal-lh-cuneus-lh	0.0679214	1.39775e-27
medialorbitofrontal-lh-cuneus-rh	-0.0285703	4.80295e-06
medialorbitofrontal-lh-entorhinal-lh	-0.0464393	1.03806e-13
medialorbitofrontal-lh-entorhinal-rh	0.171715	1.01606e-168
medialorbitofrontal-lh-frontalpole-lh	-0.000623785	0.920481
medialorbitofrontal-lh-frontalpole-rh	0.127606	1.92502e-93
medialorbitofrontal-lh-fusiform-lh	0.0619334	3.37023e-23
medialorbitofrontal-lh-fusiform-rh	0.0584806	7.46176e-21
medialorbitofrontal-lh-inferiorparietal-lh	-0.00240504	0.700316
medialorbitofrontal-lh-inferiorparietal-rh	0.0707555	8.54185e-30
medialorbitofrontal-lh-inferiortemporal-lh	0.169178	9.26547e-164
medialorbitofrontal-lh-inferiortemporal-rh	0.195664	2.00069e-219
medialorbitofrontal-lh-insula-lh	-0.0455083	3.17536e-13
medialorbitofrontal-lh-insula-rh	-0.00280193	0.653857
medialorbitofrontal-lh-isthmuscingulate-lh	0.0425551	9.53002e-12
medialorbitofrontal-lh-isthmuscingulate-rh	0.00290298	0.64223
medialorbitofrontal-lh-lateraloccipital-lh	0.00562822	0.367735
medialorbitofrontal-lh-lateraloccipital-rh	0.0554462	6.67309e-19
medialorbitofrontal-lh-lateralorbitofrontal-lh	0.128254	2.21665e-94
medialorbitofrontal-lh-lateralorbitofrontal-rh	0.132244	2.82882e-100
medialorbitofrontal-lh-lingual-lh	-0.0876399	7.42846e-45
medialorbitofrontal-lh-lingual-rh	0.133018	1.93687e-101
medialorbitofrontal-lh-medialorbitofrontal-lh	0.0125991	0.043759
medialorbitofrontal-rh-bankssts-lh	0.142262	6.7727e-116
medialorbitofrontal-rh-bankssts-rh	0.000881026	0.887873
medialorbitofrontal-rh-caudalanteriorcingulate-lh	0.124398	7.30665e-89
medialorbitofrontal-rh-caudalanteriorcingulate-rh	0.162766	1.43767e-151
medialorbitofrontal-rh-caudalmiddlefrontal-lh	-0.00358761	0.565867
medialorbitofrontal-rh-caudalmiddlefrontal-rh	0.0662271	2.66682e-26
medialorbitofrontal-rh-cuneus-lh	0.0289916	3.47265e-06
medialorbitofrontal-rh-cuneus-rh	0.0448058	7.27605e-13
medialorbitofrontal-rh-entorhinal-lh	0.046539	9.19697e-14
medialorbitofrontal-rh-entorhinal-rh	0.062238	2.06271e-23
medialorbitofrontal-rh-frontalpole-lh	0.054558	2.3781e-18
medialorbitofrontal-rh-frontalpole-rh	0.0448031	7.29921e-13
medialorbitofrontal-rh-fusiform-lh	-0.0122474	0.0499835
medialorbitofrontal-rh-fusiform-rh	0.0586312	5.9334e-21
medialorbitofrontal-rh-inferiorparietal-lh	0.048642	6.74958e-15
medialorbitofrontal-rh-inferiorparietal-rh	0.0682708	7.54038e-28
medialorbitofrontal-rh-inferiortemporal-lh	0.079168	6.74876e-37
medialorbitofrontal-rh-inferiortemporal-rh	-0.00128702	0.836814
medialorbitofrontal-rh-insula-lh	0.0681923	8.66359e-28
medialorbitofrontal-rh-insula-rh	-0.00541411	0.386239
medialorbitofrontal-rh-isthmuscingulate-lh	0.0645768	4.39056e-25
medialorbitofrontal-rh-isthmuscingulate-rh	0.070175	2.46821e-29
medialorbitofrontal-rh-lateraloccipital-lh	0.0714682	2.29451e-30
medialorbitofrontal-rh-lateraloccipital-rh	0.05884	4.31424e-21
medialorbitofrontal-rh-lateralorbitofrontal-lh	0.0113343	0.069685
medialorbitofrontal-rh-lateralorbitofrontal-rh	0.0396415	2.20189e-10
medialorbitofrontal-rh-lingual-lh	-0.03849	7.17995e-10
medialorbitofrontal-rh-lingual-rh	0.150378	2.03967e-129
medialorbitofrontal-rh-medialorbitofrontal-lh	0.110965	5.55674e-71
medialorbitofrontal-rh-medialorbitofrontal-rh	0.130858	3.30854e-98
middletemporal-lh-bankssts-lh	0.100177	3.98269e-58
middletemporal-lh-bankssts-rh	0.105905	8.73095e-65
middletemporal-lh-caudalanteriorcingulate-lh	0.0137927	0.0272842
middletemporal-lh-caudalanteriorcingulate-rh	0.0265835	2.08985e-05
middletemporal-lh-caudalmiddlefrontal-lh	0.0877223	6.15802e-45
middletemporal-lh-caudalmiddlefrontal-rh	0.0241717	0.000109323
middletemporal-lh-cuneus-lh	0.055487	6.29147e-19
middletemporal-lh-cuneus-rh	0.0589594	3.59359e-21
middletemporal-lh-entorhinal-lh	0.0609716	1.56408e-22
middletemporal-lh-entorhinal-rh	-0.00408712	0.513055
middletemporal-lh-frontalpole-lh	-0.0388306	5.07922e-10
middletemporal-lh-frontalpole-rh	0.0641863	8.43108e-25
middletemporal-lh-fusiform-lh	0.123006	6.52784e-87
middletemporal-lh-fusiform-rh	0.0464874	9.79182e-14
middletemporal-lh-inferiorparietal-lh	0.0871393	2.31029e-44
middletemporal-lh-inferiorparietal-rh	0.027154	1.38379e-05
middletemporal-lh-inferiortemporal-lh	0.11751	1.96604e-79
middletemporal-lh-inferiortemporal-rh	0.086463	1.05924e-43
middletemporal-lh-insula-lh	0.258192	0
middletemporal-lh-insula-rh	0.245865	0
middletemporal-lh-isthmuscingulate-lh	0.169618	1.29488e-164
middletemporal-lh-isthmuscingulate-rh	0.0474816	2.89229e-14
middletemporal-lh-lateraloccipital-lh	0.214968	1.69726e-265
middletemporal-lh-lateraloccipital-rh	0.183984	8.16668e-194
middletemporal-lh-lateralorbitofrontal-lh	-0.0606112	2.76311e-22
middletemporal-lh-lateralorbitofrontal-rh	-0.0640491	1.05948e-24
middletemporal-lh-lingual-lh	-0.0799265	1.41173e-37
middletemporal-lh-lingual-rh	0.0232934	0.00019279
middletemporal-lh-medialorbitofrontal-lh	0.10951	3.60917e-69
middletemporal-lh-medialorbitofrontal-rh	-0.000967258	0.876982
middletemporal-lh-middletemporal-lh	0.0541608	4.17064e-18
middletemporal-rh-bankssts-lh	0.003276	0.600084
middletemporal-rh-bankssts-rh	0.14855	2.64877e-126
middletemporal-rh-caudalanteriorcingulate-lh	-0.00778179	0.21299
middletemporal-rh-caudalanteriorcingulate-rh	0.154173	5.21279e-136
middletemporal-rh-caudalmiddlefrontal-lh	0.136104	3.74068e-106
middletemporal-rh-caudalmiddlefrontal-rh	0.208119	1.3029e-248
middletemporal-rh-cuneus-lh	0.014839	0.0175532
middletemporal-rh-cuneus-rh	0.137834	7.60236e-109
middletemporal-rh-entorhinal-lh	-0.0208604	0.000841485
middletemporal-rh-entorhinal-rh	0.158628	5.75586e-144
middletemporal-rh-frontalpole-lh	-0.0380002	1.17517e-09
middletemporal-rh-frontalpole-rh	0.0364439	5.40251e-09
middletemporal-rh-fusiform-lh	0.117656	1.25775e-79
middletemporal-rh-fusiform-rh	0.0737928	2.87766e-32
middletemporal-rh-inferiorparietal-lh	-0.0528794	2.48527e-17
middletemporal-rh-inferiorparietal-rh	0.215537	6.29544e-267
middletemporal-rh-inferiortemporal-lh	0.0340212	5.14591e-08
middletemporal-rh-inferiortemporal-rh	0.100445	1.98478e-58
middletemporal-rh-insula-lh	-0.0898741	4.3333e-47
middletemporal-rh-insula-rh	0.220848	1.79575e-280
middletemporal-rh-isthmuscingulate-lh	0.193133	9.86758e-214
middletemporal-rh-isthmuscingulate-rh	0.00800569	0.200117
middletemporal-rh-lateraloccipital-lh	0.0645602	4.51457e-25
middletemporal-rh-lateraloccipital-rh	0.10714	2.85688e-66
middletemporal-rh-lateralorbitofrontal-lh	0.054107	4.4991e-18
middletemporal-rh-lateralorbitofrontal-rh	0.0557499	4.30142e-19
middletemporal-rh-lingual-lh	0.0514139	1.81789e-16
middletemporal-rh-lingual-rh	0.0528198	2.69743e-17
middletemporal-rh-medialorbitofrontal-lh	0.0528541	2.57313e-17
middletemporal-rh-medialorbitofrontal-rh	0.0264812	2.24823e-05
middletemporal-rh-middletemporal-lh	0.0826225	4.80919e-40
middletemporal-rh-middletemporal-rh	0.0660956	3.34271e-26
paracentral-lh-bankssts-lh	0.0558439	3.75305e-19
paracentral-lh-bankssts-rh	0.0575302	3.12651e-20
paracentral-lh-caudalanteriorcingulate-lh	0.00267903	0.668112
paracentral-lh-caudalanteriorcingulate-rh	0.140145	1.70019e-112
paracentral-lh-caudalmiddlefrontal-lh	0.0837208	4.49963e-41
paracentral-lh-caudalmiddlefrontal-rh	0.105941	7.90594e-65
paracentral-lh-cuneus-lh	0.102644	6.00656e-61
paracentral-lh-cuneus-rh	0.125843	6.55391e-91
paracentral-lh-entorhinal-lh	0.0718369	1.15652e-30
paracentral-lh-entorhinal-rh	0.0500261	1.13793e-15
paracentral-lh-frontalpole-lh	0.073515	4.89139e-32
paracentral-lh-frontalpole-rh	0.0508682	3.76142e-16
paracentral-lh-fusiform-lh	0.17047	2.82832e-166
paracentral-lh-fusiform-rh	0.0951275	1.44673e-52
paracentral-lh-inferiorparietal-lh	0.124992	1.05924e-89
paracentral-lh-inferiorparietal-rh	0.117815	7.73351e-80
paracentral-lh-inferiortemporal-lh	0.115066	3.21345e-76
paracentral-lh-inferiortemporal-rh	0.0378018	1.43225e-09
paracentral-lh-insula-lh	0.0453142	3.99807e-13
paracentral-lh-insula-rh	0.0676566	2.227e-27
paracentral-lh-isthmuscingulate-lh	0.00196537	0.753119
paracentral-lh-isthmuscingulate-rh	0.0803041	6.44196e-38
paracentral-lh-lateraloccipital-lh	0.0657338	6.20691e-26
paracentral-lh-lateraloccipital-rh	0.036375	5.77195e-09
paracentral-lh-lateralorbitofrontal-lh	2.84377e-05	0.996369
paracentral-lh-lateralorbitofrontal-rh	-0.0145806	0.0196195
paracentral-lh-lingual-lh	0.0180623	0.00384196
paracentral-lh-lingual-rh	0.0905366	9.19385e-48
paracentral-lh-medialorbitofrontal-lh	0.0323571	2.22297e-07
paracentral-lh-medialorbitofrontal-rh	0.0833409	1.02476e-40
paracentral-lh-middletemporal-lh	-0.0068103	0.275755
paracentral-lh-middletemporal-rh	0.0933587	1.09493e-50
paracentral-lh-paracentral-lh	0.0331856	1.08219e-07
paracentral-rh-bankssts-lh	0.191835	7.63285e-211
paracentral-rh-bankssts-rh	0.229155	2.19179e-302
paracentral-rh-caudalanteriorcingulate-lh	0.133347	6.16054e-102
paracentral-rh-caudalanteriorcingulate-rh	0.134773	4.16135e-104
paracentral-rh-caudalmiddlefrontal-lh	0.264862	0
paracentral-rh-caudalmiddlefrontal-rh	0.157277	1.58029e-141
paracentral-rh-cuneus-lh	0.0240574	0.000117829
paracentral-rh-cuneus-rh	-0.120879	5.63669e-84
paracentral-rh-entorhinal-lh	-0.0281301	6.70895e-06
paracentral-rh-entorhinal-rh	0.132884	3.07672e-101
paracentral-rh-frontalpole-lh	0.000384287	0.950961
paracentral-rh-frontalpole-rh	0.118641	6.07309e-81
paracentral-rh-fusiform-lh	-0.0019181	0.75887
paracentral-rh-fusiform-rh	0.0871592	2.20883e-44
paracentral-rh-inferiorparietal-lh	-0.0164374	0.00851958
paracentral-rh-inferiorparietal-rh	0.0765693	1.28264e-34
paracentral-rh-inferiortemporal-lh	0.105905	8.73528e-65
paracentral-rh-inferiortemporal-rh	0.0621452	2.39623e-23
paracentral-rh-insula-lh	-0.030298	1.2354e-06
paracentral-rh-insula-rh	-0.0089137	0.153712
paracentral-rh-isthmuscingulate-lh	-0.0491309	3.61902e-15
paracentral-rh-isthmuscingulate-rh	-0.00306085	0.624243
paracentral-rh-lateraloccipital-lh	0.0418024	2.18923e-11
paracentral-rh-lateraloccipital-rh	0.0527078	3.14594e-17
paracentral-rh-lateralorbitofrontal-lh	0.0241508	0.000110834
paracentral-rh-lateralorbitofrontal-rh	-0.00726855	0.244731
paracentral-rh-lingual-lh	-0.115655	5.48432e-77
paracentral-rh-lingual-rh	0.143855	1.73015e-118
paracentral-rh-medialorbitofrontal-lh	0.0347974	2.53974e-08
paracentral-rh-medialorbitofrontal-rh	0.123232	3.15345e-87
paracentral-rh-middletemporal-lh	-0.0415695	2.82368e-11
paracentral-rh-middletemporal-rh	0.145334	6.37049e-121
paracentral-rh-paracentral-lh	0.130996	2.0677e-98
paracentral-rh-paracentral-rh	-0.0310915	6.45915e-07
parahippocampal-lh-bankssts-lh	0.030483	1.06352e-06
parahippocampal-lh-bankssts-rh	-0.00113173	0.856275
parahippocampal-lh-caudalanteriorcingulate-lh	0.0178172	0.0043498
parahippocampal-lh-caudalanteriorcingulate-rh	0.0405276	8.6671e-11
parahippocampal-lh-caudalmiddlefrontal-lh	0.0406364	7.71905e-11
parahippocampal-lh-caudalmiddlefrontal-rh	0.039008	4.23636e-10
parahippocampal-lh-cuneus-lh	0.0341222	4.69817e-08
parahippocampal-lh-cuneus-rh	-0.021503	0.000578175
parahippocampal-lh-entorhinal-lh	0.0414046	3.37805e-11
parahippocampal-lh-entorhinal-rh	0.0592268	2.38369e-21
parahippocampal-lh-frontalpole-lh	0.0175824	0.00489233
parahippocampal-lh-frontalpole-rh	0.0964346	5.61215e-54
parahippocampal-lh-fusiform-lh	-0.0274991	1.07415e-05
parahippocampal-lh-fusiform-rh	0.121097	2.833e-84
parahippocampal-lh-inferiorparietal-lh	-0.0257204	3.84057e-05
parahippocampal-lh-inferiorparietal-rh	0.027145	1.39289e-05
parahippocampal-lh-inferiortemporal-lh	0.076651	1.09054e-34
parahippocampal-lh-inferiortemporal-rh	0.0671282	5.60956e-27
parahippocampal-lh-insula-lh	0.0337751	6.41724e-08
parahippocampal-lh-insula-rh	-0.0100699	0.10705
parahippocampal-lh-isthmuscingulate-lh	0.00200966	0.747742
parahippocampal-lh-isthmuscingulate-rh	-0.0644504	5.42494e-25
parahippocampal-lh-lateraloccipital-lh	0.122596	2.41949e-86
parahippocampal-lh-lateraloccipital-rh	0.0992246	4.69373e-57
parahippocampal-lh-lateralorbitofrontal-lh	0.0877339	5.99884e-45
parahippocampal-lh-lateralorbitofrontal-rh	0.00421413	0.500047
parahippocampal-lh-lingual-lh	0.0720561	7.68218e-31
parahippocampal-lh-lingual-rh	-0.0163659	0.00881084
parahippocampal-lh-medialorbitofrontal-lh	-0.0027075	0.664799
parahippocampal-lh-medialorbitofrontal-rh	0.0973714	5.31613e-55
parahippocampal-lh-middletemporal-lh	0.0136931	0.0284167
parahippocampal-lh-middletemporal-rh	0.0500324	1.12856e-15
parahippocampal-lh-paracentral-lh	0.0401091	1.34961e-10
parahippocampal-lh-paracentral-rh	0.00692924	0.267456
parahippocampal-lh-parahippocampal-lh	-0.0269872	1.56234e-05
parahippocampal-rh-bankssts-lh	-0.0802197	7.67947e-38
parahippocampal-rh-bankssts-rh	-0.0394052	2.814e-10
parahippocampal-rh-caudalanteriorcingulate-lh	0.128335	1.68527e-94
parahippocampal-rh-caudalanteriorcingulate-rh	0.000667066	0.914984
parahippocampal-rh-caudalmiddlefrontal-lh	0.0410753	4.82304e-11
parahippocampal-rh-caudalmiddlefrontal-rh	-0.0538852	6.14431e-18
parahippocampal-rh-cuneus-lh	0.147906	3.24365e-125
parahippocampal-rh-cuneus-rh	0.0588534	4.22686e-21
parahippocampal-rh-entorhinal-lh	0.295204	0
parahippocampal-rh-entorhinal-rh	0.289994	0
parahippocampal-rh-frontalpole-lh	0.153818	2.1937e-135
parahippocampal-rh-frontalpole-rh	-0.029182	2.99504e-06
parahippocampal-rh-fusiform-lh	0.106532	1.54772e-65
parahippocampal-rh-fusiform-rh	0.197138	8.90102e-223
parahippocampal-rh-inferiorparietal-lh	-0.0230747	0.000221381
parahippocampal-rh-inferiorparietal-rh	-0.0849615	2.98255e-42
parahippocampal-rh-inferiortemporal-lh	-0.0878086	5.05958e-45
parahippocampal-rh-inferiortemporal-rh	0.0254006	4.78942e-05
parahippocampal-rh-insula-lh	-0.0564993	1.44087e-19
parahippocampal-rh-insula-rh	-0.227485	6.57828e-298
parahippocampal-rh-isthmuscingulate-lh	-0.0765038	1.46085e-34
parahippocampal-rh-isthmuscingulate-rh	-0.016762	0.00730281
parahippocampal-rh-lateraloccipital-lh	0.0591673	2.61208e-21
parahippocampal-rh-lateraloccipital-rh	-0.0552889	8.36973e-19
parahippocampal-rh-lateralorbitofrontal-lh	0.0343811	3.71599e-08
parahippocampal-rh-lateralorbitofrontal-rh	0.0133119	0.0331323
parahippocampal-rh-lingual-lh	-0.0821894	1.21339e-39
parahippocampal-rh-lingual-rh	-0.0338043	6.25148e-08
parahippocampal-rh-medialorbitofrontal-lh	-0.0674521	3.18668e-27
parahippocampal-rh-medialorbitofrontal-rh	-0.0142423	0.0226437
parahippocampal-rh-middletemporal-lh	-0.0700463	3.11925e-29
parahippocampal-rh-middletemporal-rh	0.0677439	1.91046e-27
parahippocampal-rh-paracentral-lh	0.0956659	3.81473e-53
parahippocampal-rh-paracentral-rh	-0.149202	2.07078e-127
parahippocampal-rh-parahippocampal-lh	-0.239931	0
parahippocampal-rh-parahippocampal-rh	-0.156549	3.18558e-140
parsopercularis-lh-bankssts-lh	-0.0445591	9.70684e-13
parsopercularis-lh-bankssts-rh	-0.157726	2.4648e-142
parsopercularis-lh-caudalanteriorcingulate-lh	-0.113397	4.59831e-74
parsopercularis-lh-caudalanteriorcingulate-rh	-0.17514	1.53657e-175
parsopercularis-lh-caudalmiddlefrontal-lh	-0.130113	4.19688e-97
parsopercularis-lh-caudalmiddlefrontal-rh	0.0224629	0.000323991
parsopercularis-lh-cuneus-lh	0.0548574	1.55296e-18
parsopercularis-lh-cuneus-rh	-0.0196747	0.00163851
parsopercularis-lh-entorhinal-lh	-0.0161056	0.00994782
parsopercularis-lh-entorhinal-rh	0.0310119	6.89811e-07
parsopercularis-lh-frontalpole-lh	-0.0413055	3.76124e-11
parsopercularis-lh-frontalpole-rh	-0.0744037	8.89566e-33
parsopercularis-lh-fusiform-lh	-0.0723608	4.34131e-31
parsopercularis-lh-fusiform-rh	-0.0204203	0.00108186
parsopercularis-lh-inferiorparietal-lh	-0.0706034	1.12892e-29
parsopercularis-lh-inferiorparietal-rh	0.0670051	6.94951e-27
parsopercularis-lh-inferiortemporal-lh	-0.0103414	0.0979177
parsopercularis-lh-inferiortemporal-rh	-0.189209	4.612e-205
parsopercularis-lh-insula-lh	0.0369741	3.23483e-09
parsopercularis-lh-insula-rh	-0.000983994	0.874871
parsopercularis-lh-isthmuscingulate-lh	0.0519199	9.20187e-17
parsopercularis-lh-isthmuscingulate-rh	-0.00530162	0.396184
parsopercularis-lh-lateraloccipital-lh	0.0281838	6.44276e-06
parsopercularis-lh-lateraloccipital-rh	0.0203348	0.00113535
parsopercularis-lh-lateralorbitofrontal-lh	-0.056682	1.10134e-19
parsopercularis-lh-lateralorbitofrontal-rh	-0.00227365	0.715958
parsopercularis-lh-lingual-lh	-0.022919	0.00024412
parsopercularis-lh-lingual-rh	0.134652	6.3787e-104
parsopercularis-lh-medialorbitofrontal-lh	0.0334037	8.92863e-08
parsopercularis-lh-medialorbitofrontal-rh	0.107217	2.30304e-66
parsopercularis-lh-middletemporal-lh	0.0745057	7.30579e-33
parsopercularis-lh-middletemporal-rh	-0.05276	2.92869e-17
parsopercularis-lh-paracentral-lh	-0.177534	2.15832e-180
parsopercularis-lh-paracentral-rh	-0.107673	6.4556e-67
parsopercularis-lh-parahippocampal-lh	0.0103266	0.0983965
parsopercularis-lh-parahippocampal-rh	-0.134163	3.55226e-103
parsopercularis-lh-parsopercularis-lh	-0.0140756	0.0242773
parsopercularis-rh-bankssts-lh	-0.111073	4.07257e-71
parsopercularis-rh-bankssts-rh	-0.0731447	9.89248e-32
parsopercularis-rh-caudalanteriorcingulate-lh	-0.180644	8.46e-187
parsopercularis-rh-caudalanteriorcingulate-rh	-0.280314	0
parsopercularis-rh-caudalmiddlefrontal-lh	-0.201175	4.23828e-232
parsopercularis-rh-caudalmiddlefrontal-rh	-0.031249	5.66832e-07
parsopercularis-rh-cuneus-lh	-0.105331	4.22361e-64
parsopercularis-rh-cuneus-rh	-0.0866217	7.4183e-44
parsopercularis-rh-entorhinal-lh	-0.221603	2.00351e-282
parsopercularis-rh-entorhinal-rh	-0.139668	9.75061e-112
parsopercularis-rh-frontalpole-lh	-0.146102	3.38914e-122
parsopercularis-rh-frontalpole-rh	-0.206486	1.13043e-244
parsopercularis-rh-fusiform-lh	-0.0941442	1.61941e-51
parsopercularis-rh-fusiform-rh	-0.012129	0.0522411
parsopercularis-rh-inferiorparietal-lh	-0.117937	5.31586e-80
parsopercularis-rh-inferiorparietal-rh	-0.106617	1.2219e-65
parsopercularis-rh-inferiortemporal-lh	-0.1855	4.81571e-197
parsopercularis-rh-inferiortemporal-rh	0.000288007	0.963237
parsopercularis-rh-insula-lh	0.133546	3.08002e-102
parsopercularis-rh-insula-rh	-0.0494405	2.43106e-15
parsopercularis-rh-isthmuscingulate-lh	0.0639738	1.20059e-24
parsopercularis-rh-isthmuscingulate-rh	0.0313166	5.35864e-07
parsopercularis-rh-lateraloccipital-lh	0.101654	8.30196e-60
parsopercularis-rh-lateraloccipital-rh	0.0567867	9.43734e-20
parsopercularis-rh-lateralorbitofrontal-lh	0.241973	0
parsopercularis-rh-lateralorbitofrontal-rh	0.163801	1.67207e-153
parsopercularis-rh-lingual-lh	0.24736	0
parsopercularis-rh-lingual-rh	-0.0605709	2.94411e-22
parsopercularis-rh-medialorbitofrontal-lh	0.0777341	1.24756e-35
parsopercularis-rh-medialorbitofrontal-rh	0.0560645	2.7224e-19
parsopercularis-rh-middletemporal-lh	0.115116	2.76924e-76
parsopercularis-rh-middletemporal-rh	-0.00966689	0.121843
parsopercularis-rh-paracentral-lh	0.0310838	6.50013e-07
parsopercularis-rh-paracentral-rh	0.238712	0
parsopercularis-rh-parahippocampal-lh	0.174825	6.59979e-175
parsopercularis-rh-parahippocampal-rh	0.000926018	0.882188
parsopercularis-rh-parsopercularis-lh	0.184698	2.48947e-195
parsopercularis-rh-parsopercularis-rh	0.109688	2.17084e-69
parsorbitalis-lh-bankssts-lh	0.121619	5.43149e-85
parsorbitalis-lh-bankssts-rh	-0.0729683	1.38194e-31
parsorbitalis-lh-caudalanteriorcingulate-lh	0.13397	6.98387e-103
parsorbitalis-lh-caudalanteriorcingulate-rh	0.140202	1.38166e-112
parsorbitalis-lh-caudalmiddlefrontal-lh	-0.0181756	0.00362599
parsorbitalis-lh-caudalmiddlefrontal-rh	0.0696292	6.64037e-29
parsorbitalis-lh-cuneus-lh	0.114124	5.33731e-75
parsorbitalis-lh-cuneus-rh	0.032083	2.81002e-07
parsorbitalis-lh-entorhinal-lh	0.00626661	0.315912
parsorbitalis-lh-entorhinal-rh	0.029431	2.46462e-06
parsorbitalis-lh-frontalpole-lh	0.0595999	1.3401e-21
parsorbitalis-lh-frontalpole-rh	0.0323651	2.20772e-07
parsorbitalis-lh-fusiform-lh	-0.0484344	8.77943e-15
parsorbitalis-lh-fusiform-rh	0.0441501	1.55997e-12
parsorbitalis-lh-inferiorparietal-lh	0.0127753	0.0408955
parsorbitalis-lh-inferiorparietal-rh	0.0401782	1.25483e-10
parsorbitalis-lh-inferiortemporal-lh	0.0572332	4.86931e-20
parsorbitalis-lh-inferiortemporal-rh	-0.0268356	1.74349e-05
parsorbitalis-lh-insula-lh	0.0402346	1.18223e-10
parsorbitalis-lh-insula-rh	0.0441329	1.59123e-12
parsorbitalis-lh-isthmuscingulate-lh	0.0962315	9.32497e-54
parsorbitalis-lh-isthmuscingulate-rh	0.0543935	3.00252e-18
parsorbitalis-lh-lateraloccipital-lh	0.074157	1.43085e-32
parsorbitalis-lh-lateraloccipital-rh	0.0463003	1.22828e-13
parsorbitalis-lh-lateralorbitofrontal-lh	0.018822	0.00259132
parsorbitalis-lh-lateralorbitofrontal-rh	0.0351086	1.90554e-08
parsorbitalis-lh-lingual-lh	0.0302006	1.33627e-06
parsorbitalis-lh-lingual-rh	0.160531	1.94429e-147
parsorbitalis-lh-medialorbitofrontal-lh	0.103994	1.60356e-62
parsorbitalis-lh-medialorbitofrontal-rh	0.123058	5.51341e-87
parsorbitalis-lh-middletemporal-lh	0.137168	8.3559e-108
parsorbitalis-lh-middletemporal-rh	0.112994	1.5062e-73
parsorbitalis-lh-paracentral-lh	-0.00645226	0.301789
parsorbitalis-lh-paracentral-rh	0.0229642	0.000237302
parsorbitalis-lh-parahippocampal-lh	0.064535	4.70875e-25
parsorbitalis-lh-parahippocampal-rh	-0.0815799	4.4264e-39
parsorbitalis-lh-parsopercularis-lh	0.0585901	6.31665e-21
parsorbitalis-lh-parsopercularis-rh	0.0140456	0.0245817
parsorbitalis-lh-parsorbitalis-lh	-0.0182702	0.00345415
parsorbitalis-rh-bankssts-lh	-0.0839532	2.71499e-41
parsorbitalis-rh-bankssts-rh	-0.104083	1.26045e-62
parsorbitalis-rh-caudalanteriorcingulate-lh	-0.0167188	0.00745527
parsorbitalis-rh-caudalanteriorcingulate-rh	0.0939622	2.52495e-51
parsorbitalis-rh-caudalmiddlefrontal-lh	0.0178927	0.00418719
parsorbitalis-rh-caudalmiddlefrontal-rh	0.0433917	3.71809e-12
parsorbitalis-rh-cuneus-lh	0.00981793	0.116123
parsorbitalis-rh-cuneus-rh	-0.0325766	1.84003e-07
parsorbitalis-rh-entorhinal-lh	0.0104395	0.0947713
parsorbitalis-rh-entorhinal-rh	0.173113	1.74184e-171
parsorbitalis-rh-frontalpole-lh	0.236712	0
parsorbitalis-rh-frontalpole-rh	0.147362	2.66398e-124
parsorbitalis-rh-fusiform-lh	0.0710075	5.37477e-30
parsorbitalis-rh-fusiform-rh	0.255543	0
parsorbitalis-rh-inferiorparietal-lh	0.134758	4.39168e-104
parsorbitalis-rh-inferiorparietal-rh	0.122453	3.8252e-86
parsorbitalis-rh-inferiortemporal-lh	0.145283	7.74272e-121
parsorbitalis-rh-inferiortemporal-rh	0.0188238	0.00258891
parsorbitalis-rh-insula-lh	0.0415795	2.79285e-11
parsorbitalis-rh-insula-rh	0.119217	1.01784e-81
parsorbitalis-rh-isthmuscingulate-lh	0.0523619	5.04945e-17
parsorbitalis-rh-isthmuscingulate-rh	0.00580272	0.35307
parsorbitalis-rh-lateraloccipital-lh	0.0227542	0.000270571
parsorbitalis-rh-lateraloccipital-rh	0.0629329	6.66843e-24
parsorbitalis-rh-lateralorbitofrontal-lh	0.0860594	2.61269e-43
parsorbitalis-rh-lateralorbitofrontal-rh	0.030768	8.42972e-07
parsorbitalis-rh-lingual-lh	0.0843369	1.17518e-41
parsorbitalis-rh-lingual-rh	0.0397781	1.90945e-10
parsorbitalis-rh-medialorbitofrontal-lh	0.138732	2.95591e-110
parsorbitalis-rh-medialorbitofrontal-rh	-0.0622382	2.06205e-23
parsorbitalis-rh-middletemporal-lh	0.121615	5.50054e-85
parsorbitalis-rh-middletemporal-rh	0.0915973	7.4989e-49
parsorbitalis-rh-paracentral-lh	0.0660262	3.76487e-26
parsorbitalis-rh-paracentral-rh	-0.0656876	6.71573e-26
parsorbitalis-rh-parahippocampal-lh	0.0484677	8.417e-15
parsorbitalis-rh-parahippocampal-rh	0.083757	4.1595e-41
parsorbitalis-rh-parsopercularis-lh	-0.0422493	1.33836e-11
parsorbitalis-rh-parsopercularis-rh	-0.0048296	0.439573
parsorbitalis-rh-parsorbitalis-lh	-0.0492965	2.92634e-15
parsorbitalis-rh-parsorbitalis-rh	0.00584772	0.349349
parstriangularis-lh-bankssts-lh	0.0358047	9.93283e-09
parstriangularis-lh-bankssts-rh	0.0606703	2.51759e-22
parstriangularis-lh-caudalanteriorcingulate-lh	0.0286985	4.35388e-06
parstriangularis-lh-caudalanteriorcingulate-rh	0.0578834	1.84073e-20
parstriangularis-lh-caudalmiddlefrontal-lh	0.0727417	2.12048e-31
parstriangularis-lh-caudalmiddlefrontal-rh	0.0770243	5.18328e-35
parstriangularis-lh-cuneus-lh	0.0899632	3.51986e-47
parstriangularis-lh-cuneus-rh	0.00710368	0.255598
parstriangularis-lh-entorhinal-lh	0.0617082	4.83839e-23
parstriangularis-lh-entorhinal-rh	0.0679635	1.29787e-27
parstriangularis-lh-frontalpole-lh	0.0495547	2.09802e-15
parstriangularis-lh-frontalpole-rh	0.0706571	1.02317e-29
parstriangularis-lh-fusiform-lh	0.0463528	1.15275e-13
parstriangularis-lh-fusiform-rh	0.0880221	3.10973e-45
parstriangularis-lh-inferiorparietal-lh	0.053329	1.33483e-17
parstriangularis-lh-inferiorparietal-rh	0.0588197	4.45012e-21
parstriangularis-lh-inferiortemporal-lh	0.103075	1.89594e-61
parstriangularis-lh-inferiortemporal-rh	0.0812591	8.71426e-39
parstriangularis-lh-insula-lh	0.0322539	2.42866e-07
parstriangularis-lh-insula-rh	0.0516098	1.39771e-16
parstriangularis-lh-isthmuscingulate-lh	0.0331392	1.12723e-07
parstriangularis-lh-isthmuscingulate-rh	0.0459807	1.80565e-13
parstriangularis-lh-lateraloccipital-lh	0.182836	2.17628e-191
parstriangularis-lh-lateraloccipital-rh	0.0452203	4.46796e-13
parstriangularis-lh-lateralorbitofrontal-lh	0.132456	1.35755e-100
parstriangularis-lh-lateralorbitofrontal-rh	0.139948	3.50166e-112
parstriangularis-lh-lingual-lh	0.111061	4.21317e-71
parstriangularis-lh-lingual-rh	0.0503865	7.10037e-16
parstriangularis-lh-medialorbitofrontal-lh	0.0432238	4.49771e-12
parstriangularis-lh-medialorbitofrontal-rh	0.0935162	7.4732e-51
parstriangularis-lh-middletemporal-lh	0.0281317	6.70066e-06
parstriangularis-lh-middletemporal-rh	0.0445928	9.33313e-13
parstriangularis-lh-paracentral-lh	0.0534541	1.12187e-17
parstriangularis-lh-paracentral-rh	0.0088646	0.155992
parstriangularis-lh-parahippocampal-lh	0.00608662	0.330014
parstriangularis-lh-parahippocampal-rh	-0.0376035	1.74378e-09
parstriangularis-lh-parsopercularis-lh	0.0480838	1.36499e-14
parstriangularis-lh-parsopercularis-rh	0.11604	1.71687e-77
parstriangularis-lh-parsorbitalis-lh	0.0228635	0.000252752
parstriangularis-lh-parsorbitalis-rh	0.0380375	1.13214e-09
parstriangularis-lh-parstriangularis-lh	0.138612	4.56637e-110
parstriangularis-rh-bankssts-lh	-0.155045	1.50896e-137
parstriangularis-rh-bankssts-rh	-0.0429679	6.00254e-12
parstriangularis-rh-caudalanteriorcingulate-lh	0.0346912	2.80001e-08
parstriangularis-rh-caudalanteriorcingulate-rh	0.0214964	0.000580429
parstriangularis-rh-caudalmiddlefrontal-lh	0.089715	6.27653e-47
parstriangularis-rh-caudalmiddlefrontal-rh	-0.0943987	8.68815e-52
parstriangularis-rh-cuneus-lh	-0.0375374	1.86155e-09
parstriangularis-rh-cuneus-rh	0.0876141	7.87687e-45
parstriangularis-rh-entorhinal-lh	0.00680031	0.27646
parstriangularis-rh-entorhinal-rh	0.103837	2.44456e-62
parstriangularis-rh-frontalpole-lh	0.0212909	0.000655135
parstriangularis-rh-frontalpole-rh	0.00109612	0.86075
parstriangularis-rh-fusiform-lh	0.0495538	2.10042e-15
parstriangularis-rh-fusiform-rh	0.174143	1.53907e-173
parstriangularis-rh-inferiorparietal-lh	0.158143	4.34628e-143
parstriangularis-rh-inferiorparietal-rh	0.19993	3.34565e-229
parstriangularis-rh-inferiortemporal-lh	-0.0863476	1.37166e-43
parstriangularis-rh-inferiortemporal-rh	0.0598997	8.4139e-22
parstriangularis-rh-insula-lh	0.067441	3.24967e-27
parstriangularis-rh-insula-rh	0.10199	3.41308e-60
parstriangularis-rh-isthmuscingulate-lh	0.0168715	0.00692904
parstriangularis-rh-isthmuscingulate-rh	0.0460041	1.75557e-13
parstriangularis-rh-lateraloccipital-lh	0.216751	5.45615e-270
parstriangularis-rh-lateraloccipital-rh	0.148733	1.29635e-126
parstriangularis-rh-lateralorbitofrontal-lh	-0.042711	8.00755e-12
parstriangularis-rh-lateralorbitofrontal-rh	0.0982547	5.64128e-56
parstriangularis-rh-lingual-lh	0.0650301	2.04841e-25
parstriangularis-rh-lingual-rh	0.130433	1.41309e-97
parstriangularis-rh-medialorbitofrontal-lh	-0.0610968	1.28257e-22
parstriangularis-rh-medialorbitofrontal-rh	0.0297096	1.97813e-06
parstriangularis-rh-middletemporal-lh	0.104201	9.14846e-63
parstriangularis-rh-middletemporal-rh	-0.00819057	0.189923
parstriangularis-rh-paracentral-lh	0.0663755	2.06597e-26
parstriangularis-rh-paracentral-rh	0.0825157	6.04464e-40
parstriangularis-rh-parahippocampal-lh	0.0582604	1.04202e-20
parstriangularis-rh-parahippocampal-rh	0.0541894	4.00591e-18
parstriangularis-rh-parsopercularis-lh	0.0958339	2.51256e-53
parstriangularis-rh-parsopercularis-rh	0.0472854	3.68656e-14
parstriangularis-rh-parsorbitalis-lh	0.0492463	3.12126e-15
parstriangularis-rh-parsorbitalis-rh	-0.00505644	0.41839
parstriangularis-rh-parstriangularis-lh	0.0760687	3.45483e-34
parstriangularis-rh-parstriangularis-rh	0.0418466	2.08566e-11
pericalcarine-lh-bankssts-lh	0.105474	2.85349e-64
pericalcarine-lh-bankssts-rh	0.0736369	3.87676e-32
pericalcarine-lh-caudalanteriorcingulate-lh	-0.00831224	0.183426
pericalcarine-lh-caudalanteriorcingulate-rh	0.0614751	7.02444e-23
pericalcarine-lh-caudalmiddlefrontal-lh	0.0296514	2.07131e-06
pericalcarine-lh-caudalmiddlefrontal-rh	0.066687	1.20662e-26
pericalcarine-lh-cuneus-lh	0.0697971	4.90148e-29
pericalcarine-lh-cuneus-rh	0.0626754	1.01487e-23
pericalcarine-lh-entorhinal-lh	0.0791915	6.4314e-37
pericalcarine-lh-entorhinal-rh	0.0173388	0.00551942
pericalcarine-lh-frontalpole-lh	0.0190974	0.00223901
pericalcarine-lh-frontalpole-rh	0.0383111	8.60163e-10
pericalcarine-lh-fusiform-lh	0.142962	4.9718e-117
pericalcarine-lh-fusiform-rh	0.10112	3.38465e-59
pericalcarine-lh-inferiorparietal-lh	0.114793	7.2743e-76
pericalcarine-lh-inferiorparietal-rh	0.124927	1.31069e-89
pericalcarine-lh-inferiortemporal-lh	0.108312	1.07105e-67
pericalcarine-lh-inferiortemporal-rh	-0.00242583	0.697853
pericalcarine-lh-insula-lh	0.00937486	0.133524
pericalcarine-lh-insula-rh	0.0827422	3.72062e-40
pericalcarine-lh-isthmuscingulate-lh	-0.00427373	0.494005
pericalcarine-lh-isthmuscingulate-rh	0.0122794	0.0493885
pericalcarine-lh-lateraloccipital-lh	0.0309102	7.501e-07
pericalcarine-lh-lateraloccipital-rh	0.0583056	9.73012e-21
pericalcarine-lh-lateralorbitofrontal-lh	-0.0240492	0.000118456
pericalcarine-lh-lateralorbitofrontal-rh	0.0327257	1.61719e-07
pericalcarine-lh-lingual-lh	0.0504898	6.19892e-16
pericalcarine-lh-lingual-rh	0.110348	3.28394e-70
pericalcarine-lh-medialorbitofrontal-lh	0.0352212	1.71636e-08
pericalcarine-lh-medialorbitofrontal-rh	0.0613192	9.00694e-23
pericalcarine-lh-middletemporal-lh	0.0385154	6.99761e-10
pericalcarine-lh-middletemporal-rh	0.0454061	3.58548e-13
pericalcarine-lh-paracentral-lh	0.0537234	7.70651e-18
pericalcarine-lh-paracentral-rh	0.211656	2.95229e-257
pericalcarine-lh-parahippocampal-lh	0.19043	9.70289e-208
pericalcarine-lh-parahippocampal-rh	0.164371	1.41881e-154
pericalcarine-lh-parsopercularis-lh	0.0553946	7.18836e-19
pericalcarine-lh-parsopercularis-rh	0.17992	2.67975e-185
pericalcarine-lh-parsorbitalis-lh	0.136892	2.24244e-107
pericalcarine-lh-parsorbitalis-rh	0.0506185	5.23241e-16
pericalcarine-lh-parstriangularis-lh	0.0148293	0.0176277
pericalcarine-lh-parstriangularis-rh	0.129002	1.79769e-95
pericalcarine-lh-pericalcarine-lh	-0.053259	1.47108e-17
pericalcarine-rh-bankssts-lh	0.00516192	0.408749
pericalcarine-rh-bankssts-rh	0.00812761	0.19335
pericalcarine-rh-caudalanteriorcingulate-lh	0.0279783	7.52009e-06
pericalcarine-rh-caudalanteriorcingulate-rh	0.0610197	1.44943e-22
pericalcarine-rh-caudalmiddlefrontal-lh	-0.0456303	2.74627e-13
pericalcarine-rh-caudalmiddlefrontal-rh	0.0159422	0.0107263
pericalcarine-rh-cuneus-lh	-0.0442003	1.47211e-12
pericalcarine-rh-cuneus-rh	0.0154959	0.0131365
pericalcarine-rh-entorhinal-lh	-0.0786792	1.83534e-36
pericalcarine-rh-entorhinal-rh	0.0421239	1.53731e-11
pericalcarine-rh-frontalpole-lh	0.01412	0.0238326
pericalcarine-rh-frontalpole-rh	-0.0036252	0.561804
pericalcarine-rh-fusiform-lh	-0.0370629	2.96666e-09
pericalcarine-rh-fusiform-rh	0.0180062	0.00395322
pericalcarine-rh-inferiorparietal-lh	0.0549524	1.35586e-18
pericalcarine-rh-inferiorparietal-rh	-0.0539935	5.27771e-18
pericalcarine-rh-inferiortemporal-lh	-0.0481043	1.33041e-14
pericalcarine-rh-inferiortemporal-rh	-0.0157977	0.0114595
pericalcarine-rh-insula-lh	0.0130123	0.0372948
pericalcarine-rh-insula-rh	0.00919776	0.14102
pericalcarine-rh-isthmuscingulate-lh	0.00913471	0.143765
pericalcarine-rh-isthmuscingulate-rh	0.040801	6.47471e-11
pericalcarine-rh-lateraloccipital-lh	0.0698148	4.74652e-29
pericalcarine-rh-lateraloccipital-rh	0.0944633	7.41571e-52
pericalcarine-rh-lateralorbitofrontal-lh	0.0783249	3.77512e-36
pericalcarine-rh-lateralorbitofrontal-rh	0.082916	2.56093e-40
pericalcarine-rh-lingual-lh	-0.0291948	2.96521e-06
pericalcarine-rh-lingual-rh	0.0786732	1.85773e-36
pericalcarine-rh-medialorbitofrontal-lh	0.0243162	9.94056e-05
pericalcarine-rh-medialorbitofrontal-rh	0.0630748	5.28752e-24
pericalcarine-rh-middletemporal-lh	0.00852031	0.1727
pericalcarine-rh-middletemporal-rh	0.0595381	1.47447e-21
pericalcarine-rh-paracentral-lh	0.0863354	1.40965e-43
pericalcarine-rh-paracentral-rh	-0.000439981	0.943865
pericalcarine-rh-parahippocampal-lh	0.0342667	4.12255e-08
pericalcarine-rh-parahippocampal-rh	0.0624822	1.38906e-23
pericalcarine-rh-parsopercularis-lh	0.0426306	8.76043e-12
pericalcarine-rh-parsopercularis-rh	0.0648926	2.58262e-25
pericalcarine-rh-parsorbitalis-lh	0.0265805	2.09438e-05
pericalcarine-rh-parsorbitalis-rh	0.00126945	0.839012
pericalcarine-rh-parstriangularis-lh	0.00460768	0.46088
pericalcarine-rh-parstriangularis-rh	0.0805426	3.91821e-38
pericalcarine-rh-pericalcarine-lh	0.0394921	2.57158e-10
pericalcarine-rh-pericalcarine-rh	0.0754099	1.25991e-33
postcentral-lh-bankssts-lh	0.0747083	4.93642e-33
postcentral-lh-bankssts-rh	0.0612627	9.85433e-23
postcentral-lh-caudalanteriorcingulate-lh	0.0429155	6.36661e-12
postcentral-lh-caudalanteriorcingulate-rh	0.0313934	5.02619e-07
postcentral-lh-caudalmiddlefrontal-lh	0.0299839	1.58998e-06
postcentral-lh-caudalmiddlefrontal-rh	0.0238501	0.000134857
postcentral-lh-cuneus-lh	0.0232449	0.000198807
postcentral-lh-cuneus-rh	0.0400278	1.46997e-10
postcentral-lh-entorhinal-lh	0.0946431	4.77001e-52
postcentral-lh-entorhinal-rh	0.0236045	0.000158029
postcentral-lh-frontalpole-lh	-0.00126629	0.839407
postcentral-lh-frontalpole-rh	0.00969319	0.120831
postcentral-lh-fusiform-lh	0.108203	1.45755e-67
postcentral-lh-fusiform-rh	0.0137882	0.0273347
postcentral-lh-inferiorparietal-lh	0.0575418	3.07249e-20
postcentral-lh-inferiorparietal-rh	0.113055	1.25818e-73
postcentral-lh-inferiortemporal-lh	0.0144803	0.0204772
postcentral-lh-inferiortemporal-rh	-0.0274163	1.14182e-05
postcentral-lh-insula-lh	-0.010545	0.0914826
postcentral-lh-insula-rh	-0.0633239	3.51373e-24
postcentral-lh-isthmuscingulate-lh	-0.00486599	0.436135
postcentral-lh-isthmuscingulate-rh	-0.158459	1.16484e-143
postcentral-lh-lateraloccipital-lh	-0.0324981	1.96906e-07
postcentral-lh-lateraloccipital-rh	-0.00200087	0.748808
postcentral-lh-lateralorbitofrontal-lh	-0.0041728	0.504261
postcentral-lh-lateralorbitofrontal-rh	0.0441925	1.48548e-12
postcentral-lh-lingual-lh	-0.0174521	0.00521941
postcentral-lh-lingual-rh	0.0801145	9.55629e-38
postcentral-lh-medialorbitofrontal-lh	0.0279163	7.8778e-06
postcentral-lh-medialorbitofrontal-rh	0.0441936	1.48359e-12
postcentral-lh-middletemporal-lh	-0.00467159	0.454685
postcentral-lh-middletemporal-rh	0.0251306	5.76003e-05
postcentral-lh-paracentral-lh	-0.0570904	6.01997e-20
postcentral-lh-paracentral-rh	0.026918	1.64274e-05
postcentral-lh-parahippocampal-lh	6.14588e-05	0.992152
postcentral-lh-parahippocampal-rh	0.0115911	0.0635882
postcentral-lh-parsopercularis-lh	0.0229279	0.000242768
postcentral-lh-parsopercularis-rh	-0.0150907	0.0157269
postcentral-lh-parsorbitalis-lh	-0.0856461	6.55799e-43
postcentral-lh-parsorbitalis-rh	0.0321286	2.70313e-07
postcentral-lh-parstriangularis-lh	0.0803536	5.81183e-38
postcentral-lh-parstriangularis-rh	0.0527584	2.93512e-17
postcentral-lh-pericalcarine-lh	-0.0666179	1.35994e-26
postcentral-lh-pericalcarine-rh	0.0666064	1.38714e-26
postcentral-lh-postcentral-lh	0.0123417	0.048247
postcentral-rh-bankssts-lh	-0.0773628	2.63257e-35
postcentral-rh-bankssts-rh	0.000464024	0.940803
postcentral-rh-caudalanteriorcingulate-lh	0.0128373	0.0399258
postcentral-rh-caudalanteriorcingulate-rh	-0.0228225	0.000259307
postcentral-rh-caudalmiddlefrontal-lh	0.00786886	0.207915
postcentral-rh-caudalmiddlefrontal-rh	-0.000983927	0.874879
postcentral-rh-cuneus-lh	-0.018155	0.00366451
postcentral-rh-cuneus-rh	-0.0283689	5.59997e-06
postcentral-rh-entorhinal-lh	-0.100364	2.44825e-58
postcentral-rh-entorhinal-rh	-0.00157434	0.801078
postcentral-rh-frontalpole-lh	0.0137552	0.0277061
postcentral-rh-frontalpole-rh	-0.021768	0.000493839
postcentral-rh-fusiform-lh	0.0628285	7.90802e-24
postcentral-rh-fusiform-rh	-0.0993568	3.33716e-57
postcentral-rh-inferiorparietal-lh	0.107466	1.15123e-66
postcentral-rh-inferiorparietal-rh	-0.00453474	0.468007
postcentral-rh-inferiortemporal-lh	0.038961	4.44562e-10
postcentral-rh-inferiortemporal-rh	0.0607971	2.061e-22
postcentral-rh-insula-lh	0.0537033	7.92605e-18
postcentral-rh-insula-rh	-0.0231312	0.000213639
postcentral-rh-isthmuscingulate-lh	-0.0127095	0.0419453
postcentral-rh-isthmuscingulate-rh	0.00128736	0.836772
postcentral-rh-lateraloccipital-lh	-0.0404076	9.84478e-11
postcentral-rh-lateraloccipital-rh	0.0488237	5.35783e-15
postcentral-rh-lateralorbitofrontal-lh	0.0675019	2.92107e-27
postcentral-rh-lateralorbitofrontal-rh	0.0663512	2.15442e-26
postcentral-rh-lingual-lh	0.0192023	0.00211681
postcentral-rh-lingual-rh	-0.0165973	0.0078994
postcentral-rh-medialorbitofrontal-lh	-0.0801032	9.78352e-38
postcentral-rh-medialorbitofrontal-rh	-0.0422041	1.40705e-11
postcentral-rh-middletemporal-lh	0.0535183	1.02591e-17
postcentral-rh-middletemporal-rh	-0.0448348	7.03291e-13
postcentral-rh-paracentral-lh	0.0126655	0.0426602
postcentral-rh-paracentral-rh	-0.0322526	2.43131e-07
postcentral-rh-parahippocampal-lh	-0.0741906	1.34129e-32
postcentral-rh-parahippocampal-rh	-0.116754	1.97045e-78
postcentral-rh-parsopercularis-lh	-0.159128	7.1177e-145
postcentral-rh-parsopercularis-rh	-0.0973753	5.26418e-55
postcentral-rh-parsorbitalis-lh	0.074174	1.38495e-32
postcentral-rh-parsorbitalis-rh	-0.054036	4.97125e-18
postcentral-rh-parstriangularis-lh	-0.0278009	8.58717e-06
postcentral-rh-parstriangularis-rh	-0.0814915	5.33591e-39
postcentral-rh-pericalcarine-lh	-0.0104871	0.0932783
postcentral-rh-pericalcarine-rh	-0.0305652	9.94778e-07
postcentral-rh-postcentral-lh	0.17676	8.14432e-179
postcentral-rh-postcentral-rh	0.201717	2.29727e-233
posteriorcingulate-lh-bankssts-lh	0.0598665	8.8608e-22
posteriorcingulate-lh-bankssts-rh	-0.0345165	3.28489e-08
posteriorcingulate-lh-caudalanteriorcingulate-lh	0.017117	0.0061525
posteriorcingulate-lh-caudalanteriorcingulate-rh	0.128399	1.3638e-94
posteriorcingulate-lh-caudalmiddlefrontal-lh	0.0720419	7.88793e-31
posteriorcingulate-lh-caudalmiddlefrontal-rh	0.159604	9.69013e-146
posteriorcingulate-lh-cuneus-lh	0.203832	2.41007e-238
posteriorcingulate-lh-cuneus-rh	0.137562	2.02238e-108
posteriorcingulate-lh-entorhinal-lh	0.193952	1.44939e-215
posteriorcingulate-lh-entorhinal-rh	0.0840393	2.25057e-41
posteriorcingulate-lh-frontalpole-lh	0.23703	0
posteriorcingulate-lh-frontalpole-rh	0.0212342	0.000677287
posteriorcingulate-lh-fusiform-lh	0.215513	7.24584e-267
posteriorcingulate-lh-fusiform-rh	0.0697404	5.43054e-29
posteriorcingulate-lh-inferiorparietal-lh	0.000228474	0.970833
posteriorcingulate-lh-inferiorparietal-rh	0.21323	3.73556e-261
posteriorcingulate-lh-inferiortemporal-lh	0.156237	1.15157e-139
posteriorcingulate-lh-inferiortemporal-rh	0.185911	6.34471e-198
posteriorcingulate-lh-insula-lh	0.0496061	1.96318e-15
posteriorcingulate-lh-insula-rh	0.169006	2.00135e-163
posteriorcingulate-lh-isthmuscingulate-lh	0.0876014	8.10714e-45
posteriorcingulate-lh-isthmuscingulate-rh	-0.0215672	0.000556609
posteriorcingulate-lh-lateraloccipital-lh	0.00246667	0.693023
posteriorcingulate-lh-lateraloccipital-rh	0.119026	1.84111e-81
posteriorcingulate-lh-lateralorbitofrontal-lh	0.056826	8.90449e-20
posteriorcingulate-lh-lateralorbitofrontal-rh	0.0638739	1.41719e-24
posteriorcingulate-lh-lingual-lh	0.120569	1.49114e-83
posteriorcingulate-lh-lingual-rh	0.00404647	0.517254
posteriorcingulate-lh-medialorbitofrontal-lh	0.032169	2.61141e-07
posteriorcingulate-lh-medialorbitofrontal-rh	0.0615408	6.32402e-23
posteriorcingulate-lh-middletemporal-lh	0.104446	4.70485e-63
posteriorcingulate-lh-middletemporal-rh	0.0869628	3.44182e-44
posteriorcingulate-lh-paracentral-lh	0.0202206	0.00121067
posteriorcingulate-lh-paracentral-rh	0.036087	7.60029e-09
posteriorcingulate-lh-parahippocampal-lh	0.0788781	1.22238e-36
posteriorcingulate-lh-parahippocampal-rh	0.0428623	6.75891e-12
posteriorcingulate-lh-parsopercularis-lh	0.0532495	1.49047e-17
posteriorcingulate-lh-parsopercularis-rh	0.0742226	1.26116e-32
posteriorcingulate-lh-parsorbitalis-lh	0.0469702	5.43262e-14
posteriorcingulate-lh-parsorbitalis-rh	0.150432	1.64786e-129
posteriorcingulate-lh-parstriangularis-lh	0.107955	2.92826e-67
posteriorcingulate-lh-parstriangularis-rh	0.0608	2.05178e-22
posteriorcingulate-lh-pericalcarine-lh	0.0910868	2.51483e-48
posteriorcingulate-lh-pericalcarine-rh	0.0298989	1.70168e-06
posteriorcingulate-lh-postcentral-lh	0.127986	5.42006e-94
posteriorcingulate-lh-postcentral-rh	0.141727	4.95863e-115
posteriorcingulate-lh-posteriorcingulate-lh	0.123531	1.20687e-87
posteriorcingulate-rh-bankssts-lh	0.242966	0
posteriorcingulate-rh-bankssts-rh	0.0447071	8.16672e-13
posteriorcingulate-rh-caudalanteriorcingulate-lh	0.127505	2.69337e-93
posteriorcingulate-rh-caudalanteriorcingulate-rh	0.148265	8.0209e-126
posteriorcingulate-rh-caudalmiddlefrontal-lh	0.172945	3.74849e-171
posteriorcingulate-rh-caudalmiddlefrontal-rh	0.1231	4.82892e-87
posteriorcingulate-rh-cuneus-lh	0.104611	3.01188e-63
posteriorcingulate-rh-cuneus-rh	0.0335877	7.58367e-08
posteriorcingulate-rh-entorhinal-lh	0.0175893	0.00487562
posteriorcingulate-rh-entorhinal-rh	0.109018	1.46036e-68
posteriorcingulate-rh-frontalpole-lh	0.1522	1.46805e-132
posteriorcingulate-rh-frontalpole-rh	0.0616957	4.93575e-23
posteriorcingulate-rh-fusiform-lh	0.0688916	2.49867e-28
posteriorcingulate-rh-fusiform-rh	0.111004	4.96353e-71
posteriorcingulate-rh-inferiorparietal-lh	0.10638	2.35529e-65
posteriorcingulate-rh-inferiorparietal-rh	0.0810429	1.37356e-38
posteriorcingulate-rh-inferiortemporal-lh	0.102272	1.61589e-60
posteriorcingulate-rh-inferiortemporal-rh	0.126237	1.79285e-91
posteriorcingulate-rh-insula-lh	0.0805519	3.84239e-38
posteriorcingulate-rh-insula-rh	0.0731421	9.9415e-32
posteriorcingulate-rh-isthmuscingulate-lh	0.175225	1.03535e-175
posteriorcingulate-rh-isthmuscingulate-rh	0.206841	1.58292e-245
posteriorcingulate-rh-lateraloccipital-lh	0.150414	1.76571e-129
posteriorcingulate-rh-lateraloccipital-rh	0.174132	1.61743e-173
posteriorcingulate-rh-lateralorbitofrontal-lh	0.164778	2.42756e-155
posteriorcingulate-rh-lateralorbitofrontal-rh	0.210866	2.59184e-255
posteriorcingulate-rh-lingual-lh	0.182587	7.27757e-191
posteriorcingulate-rh-lingual-rh	0.047033	5.03026e-14
posteriorcingulate-rh-medialorbitofrontal-lh	0.06391	1.33476e-24
posteriorcingulate-rh-medialorbitofrontal-rh	0.0261798	2.78435e-05
posteriorcingulate-rh-middletemporal-lh	0.0695474	7.69641e-29
posteriorcingulate-rh-middletemporal-rh	0.0373137	2.32059e-09
posteriorcingulate-rh-paracentral-lh	0.0145821	0.0196074
posteriorcingulate-rh-paracentral-rh	-0.0646922	3.61784e-25
posteriorcingulate-rh-parahippocampal-lh	0.0521475	6.76001e-17
posteriorcingulate-rh-parahippocampal-rh	-0.0390831	3.92243e-10
posteriorcingulate-rh-parsopercularis-lh	-0.0604331	3.65612e-22
posteriorcingulate-rh-parsopercularis-rh	0.0885602	9.06812e-46
posteriorcingulate-rh-parsorbitalis-lh	0.0314348	4.85549e-07
posteriorcingulate-rh-parsorbitalis-rh	-0.0579707	1.61409e-20
posteriorcingulate-rh-parstriangularis-lh	0.0125211	0.045081
posteriorcingulate-rh-parstriangularis-rh	-0.0116174	0.0629908
posteriorcingulate-rh-pericalcarine-lh	-0.0219026	0.000455538
posteriorcingulate-rh-pericalcarine-rh	0.00175867	0.778365
posteriorcingulate-rh-postcentral-lh	0.0566047	1.23412e-19
posteriorcingulate-rh-postcentral-rh	0.0313364	5.271e-07
posteriorcingulate-rh-posteriorcingulate-lh	0.0100139	0.109019
posteriorcingulate-rh-posteriorcingulate-rh	0.0125264	0.0449897
precentral-lh-bankssts-lh	0.0428274	7.02858e-12
precentral-lh-bankssts-rh	-0.0115082	0.0655065
precentral-lh-caudalanteriorcingulate-lh	0.0183082	0.00338721
precentral-lh-caudalanteriorcingulate-rh	-0.0486254	6.8934e-15
precentral-lh-caudalmiddlefrontal-lh	0.0293192	2.69042e-06
precentral-lh-caudalmiddlefrontal-rh	-0.0440703	1.71046e-12
precentral-lh-cuneus-lh	0.0033181	0.595407
precentral-lh-cuneus-rh	0.0134545	0.0312947
precentral-lh-entorhinal-lh	0.044874	6.71698e-13
precentral-lh-entorhinal-rh	0.022918	0.000244279
precentral-lh-frontalpole-lh	0.0229688	0.000236618
precentral-lh-frontalpole-rh	-0.00739515	0.236609
precentral-lh-fusiform-lh	0.187092	1.82895e-200
precentral-lh-fusiform-rh	0.203123	1.14092e-236
precentral-lh-inferiorparietal-lh	0.090312	1.55701e-47
precentral-lh-inferiorparietal-rh	0.0837222	4.48593e-41
precentral-lh-inferiortemporal-lh	0.118423	1.18952e-80
precentral-lh-inferiortemporal-rh	0.000849017	0.891921
precentral-lh-insula-lh	0.124774	2.15764e-89
precentral-lh-insula-rh	0.118863	3.05727e-81
precentral-lh-isthmuscingulate-lh	0.131896	9.39053e-100
precentral-lh-isthmuscingulate-rh	0.175622	1.6394e-176
precentral-lh-lateraloccipital-lh	0.0322395	2.4586e-07
precentral-lh-lateraloccipital-rh	0.099781	1.11437e-57
precentral-lh-lateralorbitofrontal-lh	0.0743625	9.63199e-33
precentral-lh-lateralorbitofrontal-rh	0.153771	2.65886e-135
precentral-lh-lingual-lh	0.0689452	2.27048e-28
precentral-lh-lingual-rh	0.0430945	5.20471e-12
precentral-lh-medialorbitofrontal-lh	0.00424929	0.496478
precentral-lh-medialorbitofrontal-rh	-0.00686877	0.271653
precentral-lh-middletemporal-lh	0.131679	1.97977e-99
precentral-lh-middletemporal-rh	0.12833	1.7137e-94
precentral-lh-paracentral-lh	-0.0824278	7.29523e-40
precentral-lh-paracentral-rh	-0.127486	2.86985e-93
precentral-lh-parahippocampal-lh	-0.131753	1.53451e-99
precentral-lh-parahippocampal-rh	-0.14307	3.31497e-117
precentral-lh-parsopercularis-lh	-0.0474617	2.96449e-14
precentral-lh-parsopercularis-rh	-0.0696704	6.16367e-29
precentral-lh-parsorbitalis-lh	0.0242688	0.000102562
precentral-lh-parsorbitalis-rh	-0.0937987	3.76042e-51
precentral-lh-parstriangularis-lh	-0.0560765	2.67516e-19
precentral-lh-parstriangularis-rh	-0.163817	1.55833e-153
precentral-lh-pericalcarine-lh	-0.0355806	1.22663e-08
precentral-lh-pericalcarine-rh	-0.00332802	0.594308
precentral-lh-postcentral-lh	-0.0280915	6.90679e-06
precentral-lh-postcentral-rh	-0.0366988	4.22568e-09
precentral-lh-posteriorcingulate-lh	0.0325197	1.93261e-07
precentral-lh-posteriorcingulate-rh	-0.0211634	0.000705892
precentral-lh-precentral-lh	0.0128334	0.039987
precentral-rh-bankssts-lh	-0.0404951	8.97172e-11
precentral-rh-bankssts-rh	0.00246733	0.692944
precentral-rh-caudalanteriorcingulate-lh	0.149172	2.32977e-127
precentral-rh-caudalanteriorcingulate-rh	0.0895162	9.96604e-47
precentral-rh-caudalmiddlefrontal-lh	0.0623444	1.73661e-23
precentral-rh-caudalmiddlefrontal-rh	0.0490441	4.04453e-15
precentral-rh-cuneus-lh	0.11654	3.78303e-78
precentral-rh-cuneus-rh	0.00881064	0.158526
precentral-rh-entorhinal-lh	0.0210835	0.00073954
precentral-rh-entorhinal-rh	0.0598732	8.76827e-22
precentral-rh-frontalpole-lh	0.135917	7.25755e-106
precentral-rh-frontalpole-rh	0.0169728	0.00659853
precentral-rh-fusiform-lh	0.0661969	2.80927e-26
precentral-rh-fusiform-rh	0.011384	0.0684688
precentral-rh-inferiorparietal-lh	-0.0221077	0.000402459
precentral-rh-inferiorparietal-rh	0.00849488	0.173985
precentral-rh-inferiortemporal-lh	0.116561	3.54606e-78
precentral-rh-inferiortemporal-rh	0.0325631	1.86163e-07
precentral-rh-insula-lh	0.011682	0.0615381
precentral-rh-insula-rh	0.129204	9.10553e-96
precentral-rh-isthmuscingulate-lh	0.0225484	0.000307358
precentral-rh-isthmuscingulate-rh	0.00718151	0.250426
precentral-rh-lateraloccipital-lh	0.0149659	0.0166109
precentral-rh-lateraloccipital-rh	0.0915211	8.98684e-49
precentral-rh-lateralorbitofrontal-lh	0.0124741	0.0458916
precentral-rh-lateralorbitofrontal-rh	0.0465152	9.46734e-14
precentral-rh-lingual-lh	0.0825824	5.23984e-40
precentral-rh-lingual-rh	0.0628924	7.12432e-24
precentral-rh-medialorbitofrontal-lh	0.034491	3.36228e-08
precentral-rh-medialorbitofrontal-rh	0.0107545	0.0852215
precentral-rh-middletemporal-lh	0.0248901	6.77849e-05
precentral-rh-middletemporal-rh	0.138688	3.46716e-110
precentral-rh-paracentral-lh	0.112424	8.0147e-73
precentral-rh-paracentral-rh	0.0759712	4.18662e-34
precentral-rh-parahippocampal-lh	0.0494893	2.28301e-15
precentral-rh-parahippocampal-rh	0.0429839	5.89571e-12
precentral-rh-parsopercularis-lh	0.0351071	1.90808e-08
precentral-rh-parsopercularis-rh	0.0945514	5.97484e-52
precentral-rh-parsorbitalis-lh	0.110544	1.86771e-70
precentral-rh-parsorbitalis-rh	0.0963531	6.88145e-54
precentral-rh-parstriangularis-lh	0.162401	6.86082e-151
precentral-rh-parstriangularis-rh	0.0209007	0.000822149
precentral-rh-pericalcarine-lh	0.0873571	1.41118e-44
precentral-rh-pericalcarine-rh	0.129012	1.73515e-95
precentral-rh-postcentral-lh	0.150732	5.02315e-130
precentral-rh-postcentral-rh	0.0666761	1.22978e-26
precentral-rh-posteriorcingulate-lh	0.0389245	4.61478e-10
precentral-rh-posteriorcingulate-rh	0.00573369	0.358826
precentral-rh-precentral-lh	0.0175014	0.00509333
precentral-rh-precentral-rh	0.0597142	1.12259e-21
precuneus-lh-bankssts-lh	0.0515799	1.45506e-16
precuneus-lh-bankssts-rh	0.0590794	2.98974e-21
precuneus-lh-caudalanteriorcingulate-lh	-0.0339614	5.43012e-08
precuneus-lh-caudalanteriorcingulate-rh	0.0314041	4.98132e-07
precuneus-lh-caudalmiddlefrontal-lh	0.0363978	5.64728e-09
precuneus-lh-caudalmiddlefrontal-rh	0.0612766	9.63883e-23
precuneus-lh-cuneus-lh	0.00336456	0.590265
precuneus-lh-cuneus-rh	0.0454815	3.27834e-13
precuneus-lh-entorhinal-lh	-0.00108524	0.862119
precuneus-lh-entorhinal-rh	0.0940831	1.88007e-51
precuneus-lh-frontalpole-lh	0.0401319	1.31756e-10
precuneus-lh-frontalpole-rh	0.219701	1.62399e-277
precuneus-lh-fusiform-lh	0.201767	1.75139e-233
precuneus-lh-fusiform-rh	0.0784633	2.84959e-36
precuneus-lh-inferiorparietal-lh	0.142948	5.23536e-117
precuneus-lh-inferiorparietal-rh	0.159267	3.9849e-145
precuneus-lh-inferiortemporal-lh	0.0701538	2.56542e-29
precuneus-lh-inferiortemporal-rh	0.0981852	6.7353e-56
precuneus-lh-insula-lh	0.0305602	9.98828e-07
precuneus-lh-insula-rh	0.11376	1.57428e-74
precuneus-lh-isthmuscingulate-lh	0.00853941	0.171739
precuneus-lh-isthmuscingulate-rh	0.0353738	1.48877e-08
precuneus-lh-lateraloccipital-lh	-0.0329675	1.31012e-07
precuneus-lh-lateraloccipital-rh	0.139408	2.5197e-111
precuneus-lh-lateralorbitofrontal-lh	0.0334582	8.50804e-08
precuneus-lh-lateralorbitofrontal-rh	0.104443	4.74094e-63
precuneus-lh-lingual-lh	0.0380691	1.09691e-09
precuneus-lh-lingual-rh	0.0978996	1.39348e-55
precuneus-lh-medialorbitofrontal-lh	-0.0505497	5.72926e-16
precuneus-lh-medialorbitofrontal-rh	0.0160823	0.0100558
precuneus-lh-middletemporal-lh	0.0364806	5.21549e-09
precuneus-lh-middletemporal-rh	-0.0268002	1.78859e-05
precuneus-lh-paracentral-lh	-0.0214701	0.00058953
precuneus-lh-paracentral-rh	-0.0407572	6.78525e-11
precuneus-lh-parahippocampal-lh	0.0205188	0.00102313
precuneus-lh-parahippocampal-rh	0.0131874	0.0348105
precuneus-lh-parsopercularis-lh	0.0582221	1.10424e-20
precuneus-lh-parsopercularis-rh	0.0207896	0.000876481
precuneus-lh-parsorbitalis-lh	0.0133943	0.0320601
precuneus-lh-parsorbitalis-rh	0.0564802	1.48195e-19
precuneus-lh-parstriangularis-lh	0.0850626	2.38652e-42
precuneus-lh-parstriangularis-rh	0.0569809	7.08076e-20
precuneus-lh-pericalcarine-lh	0.0192008	0.00211851
precuneus-lh-pericalcarine-rh	0.0627316	9.2605e-24
precuneus-lh-postcentral-lh	0.068476	5.2394e-28
precuneus-lh-postcentral-rh	0.0443456	1.24411e-12
precuneus-lh-posteriorcingulate-lh	0.0627356	9.20105e-24
precuneus-lh-posteriorcingulate-rh	0.0410524	4.94319e-11
precuneus-lh-precentral-lh	0.0654522	1.00235e-25
precuneus-lh-precentral-rh	0.0357786	1.01802e-08
precuneus-lh-precuneus-lh	0.0450118	5.71301e-13
precuneus-rh-bankssts-lh	0.0675934	2.4879e-27
precuneus-rh-bankssts-rh	0.045137	4.92974e-13
precuneus-rh-caudalanteriorcingulate-lh	0.0186858	0.00278369
precuneus-rh-caudalanteriorcingulate-rh	0.047666	2.30037e-14
precuneus-rh-caudalmiddlefrontal-lh	0.0545611	2.36771e-18
precuneus-rh-caudalmiddlefrontal-rh	0.0432604	4.31488e-12
precuneus-rh-cuneus-lh	0.189554	8.13863e-206
precuneus-rh-cuneus-rh	0.0544253	2.87027e-18
precuneus-rh-entorhinal-lh	0.0947048	4.09947e-52
precuneus-rh-entorhinal-rh	0.0811833	1.02229e-38
precuneus-rh-frontalpole-lh	0.128821	3.30301e-95
precuneus-rh-frontalpole-rh	0.0487875	5.61102e-15
precuneus-rh-fusiform-lh	0.0354242	1.42024e-08
precuneus-rh-fusiform-rh	0.0506495	5.02275e-16
precuneus-rh-inferiorparietal-lh	0.0209293	0.000808663
precuneus-rh-inferiorparietal-rh	0.0256131	4.13718e-05
precuneus-rh-inferiortemporal-lh	0.0354113	1.43751e-08
precuneus-rh-inferiortemporal-rh	0.0111845	0.073458
precuneus-rh-insula-lh	-0.00411942	0.50973
precuneus-rh-insula-rh	0.00121209	0.846193
precuneus-rh-isthmuscingulate-lh	0.044604	9.212e-13
precuneus-rh-isthmuscingulate-rh	0.102157	2.19094e-60
precuneus-rh-lateraloccipital-lh	-0.00608958	0.329778
precuneus-rh-lateraloccipital-rh	0.031446	4.81012e-07
precuneus-rh-lateralorbitofrontal-lh	0.074224	1.25772e-32
precuneus-rh-lateralorbitofrontal-rh	-0.0994533	2.60182e-57
precuneus-rh-lingual-lh	-0.00586778	0.347698
precuneus-rh-lingual-rh	0.0645973	4.242e-25
precuneus-rh-medialorbitofrontal-lh	0.0769308	6.24729e-35
precuneus-rh-medialorbitofrontal-rh	0.138319	1.31787e-109
precuneus-rh-middletemporal-lh	-0.066047	3.63281e-26
precuneus-rh-middletemporal-rh	0.0272686	1.27257e-05
precuneus-rh-paracentral-lh	0.140929	9.49053e-114
precuneus-rh-paracentral-rh	0.0371713	2.66845e-09
precuneus-rh-parahippocampal-lh	0.158103	5.14759e-143
precuneus-rh-parahippocampal-rh	0.0965689	4.00834e-54
precuneus-rh-parsopercularis-lh	0.0608161	2.00014e-22
precuneus-rh-parsopercularis-rh	0.0129795	0.037777
precuneus-rh-parsorbitalis-lh	0.187509	2.2931e-201
precuneus-rh-parsorbitalis-rh	0.0293476	2.63135e-06
precuneus-rh-parstriangularis-lh	0.0707826	8.12826e-30
precuneus-rh-parstriangularis-rh	0.0535104	1.03731e-17
precuneus-rh-pericalcarine-lh	0.206511	9.81288e-245
precuneus-rh-pericalcarine-rh	0.00448956	0.472452
precuneus-rh-postcentral-lh	0.0453238	3.95284e-13
precuneus-rh-postcentral-rh	0.00517024	0.407993
precuneus-rh-posteriorcingulate-lh	0.0292773	2.78015e-06
precuneus-rh-posteriorcingulate-rh	-0.00542518	0.385268
precuneus-rh-precentral-lh	0.0879261	3.87095e-45
precuneus-rh-precentral-rh	0.0438431	2.22111e-12
precuneus-rh-precuneus-lh	0.0094006	0.132461
precuneus-rh-precuneus-rh	0.103786	2.80773e-62
rostralanteriorcingulate-lh-bankssts-lh	0.0397578	1.95039e-10
rostralanteriorcingulate-lh-bankssts-rh	0.0252034	5.48156e-05
rostralanteriorcingulate-lh-caudalanteriorcingulate-lh	0.0525609	3.84762e-17
rostralanteriorcingulate-lh-caudalanteriorcingulate-rh	0.110814	8.60224e-71
rostralanteriorcingulate-lh-caudalmiddlefrontal-lh	0.0550792	1.13095e-18
rostralanteriorcingulate-lh-caudalmiddlefrontal-rh	0.0798143	1.78096e-37
rostralanteriorcingulate-lh-cuneus-lh	0.0753	1.5619e-33
rostralanteriorcingulate-lh-cuneus-rh	0.037846	1.37069e-09
rostralanteriorcingulate-lh-entorhinal-lh	0.0401193	1.33518e-10
rostralanteriorcingulate-lh-entorhinal-rh	0.0285964	4.70823e-06
rostralanteriorcingulate-lh-frontalpole-lh	0.0479878	1.53956e-14
rostralanteriorcingulate-lh-frontalpole-rh	0.117983	4.61733e-80
rostralanteriorcingulate-lh-fusiform-lh	0.0949267	2.37404e-52
rostralanteriorcingulate-lh-fusiform-rh	0.0709275	6.22722e-30
rostralanteriorcingulate-lh-inferiorparietal-lh	0.0528633	2.54088e-17
rostralanteriorcingulate-lh-inferiorparietal-rh	0.0575053	3.24512e-20
rostralanteriorcingulate-lh-inferiortemporal-lh	0.0440926	1.66701e-12
rostralanteriorcingulate-lh-inferiortemporal-rh	0.0846821	5.51514e-42
rostralanteriorcingulate-lh-insula-lh	0.0928813	3.46994e-50
rostralanteriorcingulate-lh-insula-rh	0.0889302	3.86813e-46
rostralanteriorcingulate-lh-isthmuscingulate-lh	0.23965	0
rostralanteriorcingulate-lh-isthmuscingulate-rh	0.0404038	9.88476e-11
rostralanteriorcingulate-lh-lateraloccipital-lh	0.108953	1.75404e-68
rostralanteriorcingulate-lh-lateraloccipital-rh	0.0961556	1.1272e-53
rostralanteriorcingulate-lh-lateralorbitofrontal-lh	0.195496	4.81624e-219
rostralanteriorcingulate-lh-lateralorbitofrontal-rh	0.0631304	4.82693e-24
rostralanteriorcingulate-lh-lingual-lh	0.047817	1.90603e-14
rostralanteriorcingulate-lh-lingual-rh	0.0229421	0.000240624
rostralanteriorcingulate-lh-medialorbitofrontal-lh	0.00522686	0.402878
rostralanteriorcingulate-lh-medialorbitofrontal-rh	0.0717002	1.49153e-30
rostralanteriorcingulate-lh-middletemporal-lh	0.034114	4.73295e-08
rostralanteriorcingulate-lh-middletemporal-rh	0.0458286	2.16674e-13
rostralanteriorcingulate-lh-paracentral-lh	-0.00423106	0.498327
rostralanteriorcingulate-lh-paracentral-rh	0.0293866	2.55209e-06
rostralanteriorcingulate-lh-parahippocampal-lh	0.0442094	1.45663e-12
rostralanteriorcingulate-lh-parahippocampal-rh	0.0874889	1.04671e-44
rostralanteriorcingulate-lh-parsopercularis-lh	-0.0123394	0.0482883
rostralanteriorcingulate-lh-parsopercularis-rh	0.0284201	5.38618e-06
rostralanteriorcingulate-lh-parsorbitalis-lh	0.0421718	1.45821e-11
rostralanteriorcingulate-lh-parsorbitalis-rh	-0.00579322	0.353859
rostralanteriorcingulate-lh-parstriangularis-lh	0.06666	1.26444e-26
rostralanteriorcingulate-lh-parstriangularis-rh	0.173003	2.88092e-171
rostralanteriorcingulate-lh-pericalcarine-lh	0.178329	5.10342e-182
rostralanteriorcingulate-lh-pericalcarine-rh	0.11737	3.01307e-79
rostralanteriorcingulate-lh-postcentral-lh	0.0617889	4.25112e-23
rostralanteriorcingulate-lh-postcentral-rh	0.132928	2.64532e-101
rostralanteriorcingulate-lh-posteriorcingulate-lh	0.186531	2.96598e-199
rostralanteriorcingulate-lh-posteriorcingulate-rh	-0.0302122	1.3238e-06
rostralanteriorcingulate-lh-precentral-lh	0.0396605	2.15872e-10
rostralanteriorcingulate-lh-precentral-rh	0.0432881	4.1815e-12
rostralanteriorcingulate-lh-precuneus-lh	0.0647878	3.08097e-25
rostralanteriorcingulate-lh-precuneus-rh	0.0142506	0.0225644
rostralanteriorcingulate-lh-rostralanteriorcingulate-lh	0.0298174	1.8157e-06
rostralanteriorcingulate-rh-bankssts-lh	0.172352	5.61152e-170
rostralanteriorcingulate-rh-bankssts-rh	0.11501	3.8014e-76
rostralanteriorcingulate-rh-caudalanteriorcingulate-lh	-0.0082311	0.18774
rostralanteriorcingulate-rh-caudalanteriorcingulate-rh	0.0720057	8.44001e-31
rostralanteriorcingulate-rh-caudalmiddlefrontal-lh	0.0464582	1.01452e-13
rostralanteriorcingulate-rh-caudalmiddlefrontal-rh	0.0883623	1.42798e-45
rostralanteriorcingulate-rh-cuneus-lh	-0.0574948	3.29635e-20
rostralanteriorcingulate-rh-cuneus-rh	0.0469993	5.24226e-14
rostralanteriorcingulate-rh-entorhinal-lh	0.0734298	5.75455e-32
rostralanteriorcingulate-rh-entorhinal-rh	-0.00817758	0.190626
rostralanteriorcingulate-rh-frontalpole-lh	0.046111	1.54364e-13
rostralanteriorcingulate-rh-frontalpole-rh	0.063116	4.94241e-24
rostralanteriorcingulate-rh-fusiform-lh	0.0413385	3.62942e-11
rostralanteriorcingulate-rh-fusiform-rh	0.0424876	1.02738e-11
rostralanteriorcingulate-rh-inferiorparietal-lh	0.0582102	1.12435e-20
rostralanteriorcingulate-rh-inferiorparietal-rh	0.0618839	3.64979e-23
rostralanteriorcingulate-rh-inferiortemporal-lh	0.035774	1.02248e-08
rostralanteriorcingulate-rh-inferiortemporal-rh	-0.0129264	0.0385671
rostralanteriorcingulate-rh-insula-lh	0.0741081	1.57173e-32
rostralanteriorcingulate-rh-insula-rh	0.0202378	0.00119907
rostralanteriorcingulate-rh-isthmuscingulate-lh	0.0693055	1.18989e-28
rostralanteriorcingulate-rh-isthmuscingulate-rh	0.0456209	2.77706e-13
rostralanteriorcingulate-rh-lateraloccipital-lh	-0.014651	0.0190368
rostralanteriorcingulate-rh-lateraloccipital-rh	0.0590381	3.18529e-21
rostralanteriorcingulate-rh-lateralorbitofrontal-lh	0.0166378	0.00774882
rostralanteriorcingulate-rh-lateralorbitofrontal-rh	0.0450195	5.66171e-13
rostralanteriorcingulate-rh-lingual-lh	0.0327948	1.52297e-07
rostralanteriorcingulate-rh-lingual-rh	0.0456297	2.7481e-13
rostralanteriorcingulate-rh-medialorbitofrontal-lh	0.0452226	4.45593e-13
rostralanteriorcingulate-rh-medialorbitofrontal-rh	0.00656134	0.29369
rostralanteriorcingulate-rh-middletemporal-lh	0.0105205	0.0922382
rostralanteriorcingulate-rh-middletemporal-rh	0.0208185	0.000862032
rostralanteriorcingulate-rh-paracentral-lh	0.132409	1.59939e-100
rostralanteriorcingulate-rh-paracentral-rh	0.0633825	3.19067e-24
rostralanteriorcingulate-rh-parahippocampal-lh	0.0781464	5.42276e-36
rostralanteriorcingulate-rh-parahippocampal-rh	0.0927179	5.14362e-50
rostralanteriorcingulate-rh-parsopercularis-lh	0.117101	6.85149e-79
rostralanteriorcingulate-rh-parsopercularis-rh	-0.0025668	0.681234
rostralanteriorcingulate-rh-parsorbitalis-lh	0.00614221	0.325616
rostralanteriorcingulate-rh-parsorbitalis-rh	0.0300287	1.53397e-06
rostralanteriorcingulate-rh-parstriangularis-lh	-0.0431036	5.15168e-12
rostralanteriorcingulate-rh-parstriangularis-rh	0.0386507	6.10038e-10
rostralanteriorcingulate-rh-pericalcarine-lh	0.00360449	0.564041
rostralanteriorcingulate-rh-pericalcarine-rh	0.0379885	1.18898e-09
rostralanteriorcingulate-rh-postcentral-lh	-0.0516852	1.26288e-16
rostralanteriorcingulate-rh-postcentral-rh	-0.0117701	0.0596057
rostralanteriorcingulate-rh-posteriorcingulate-lh	0.0261005	2.94428e-05
rostralanteriorcingulate-rh-posteriorcingulate-rh	0.0666147	1.36734e-26
rostralanteriorcingulate-rh-precentral-lh	0.000842662	0.892725
rostralanteriorcingulate-rh-precentral-rh	0.0311244	6.28537e-07
rostralanteriorcingulate-rh-precuneus-lh	-0.011441	0.067096
rostralanteriorcingulate-rh-precuneus-rh	0.0359004	9.07325e-09
rostralanteriorcingulate-rh-rostralanteriorcingulate-lh	0.0195498	0.00175421
rostralanteriorcingulate-rh-rostralanteriorcingulate-rh	0.146827	2.09844e-123
rostralmiddlefrontal-lh-bankssts-lh	0.165519	9.66494e-157
rostralmiddlefrontal-lh-bankssts-rh	0.113353	5.23237e-74
rostralmiddlefrontal-lh-caudalanteriorcingulate-lh	0.0597391	1.08004e-21
rostralmiddlefrontal-lh-caudalanteriorcingulate-rh	0.151897	4.9188e-132
rostralmiddlefrontal-lh-caudalmiddlefrontal-lh	0.0920877	2.33083e-49
rostralmiddlefrontal-lh-caudalmiddlefrontal-rh	-0.00666715	0.285974
rostralmiddlefrontal-lh-cuneus-lh	-0.0750177	2.70739e-33
rostralmiddlefrontal-lh-cuneus-rh	0.0368409	3.68212e-09
rostralmiddlefrontal-lh-entorhinal-lh	-0.00925369	0.138618
rostralmiddlefrontal-lh-entorhinal-rh	0.00427045	0.494336
rostralmiddlefrontal-lh-frontalpole-lh	0.0399332	1.62346e-10
rostralmiddlefrontal-lh-frontalpole-rh	0.041035	5.03693e-11
rostralmiddlefrontal-lh-fusiform-lh	0.0283825	5.54244e-06
rostralmiddlefrontal-lh-fusiform-rh	0.0126085	0.043603
rostralmiddlefrontal-lh-inferiorparietal-lh	0.0237216	0.00014655
rostralmiddlefrontal-lh-inferiorparietal-rh	0.0128668	0.039472
rostralmiddlefrontal-lh-inferiortemporal-lh	-0.00780604	0.211568
rostralmiddlefrontal-lh-inferiortemporal-rh	0.0693337	1.13098e-28
rostralmiddlefrontal-lh-insula-lh	0.00895657	0.151743
rostralmiddlefrontal-lh-insula-rh	0.0306994	8.91595e-07
rostralmiddlefrontal-lh-isthmuscingulate-lh	0.0334487	8.57977e-08
rostralmiddlefrontal-lh-isthmuscingulate-rh	0.0858405	4.25617e-43
rostralmiddlefrontal-lh-lateraloccipital-lh	0.00623979	0.317988
rostralmiddlefrontal-lh-lateraloccipital-rh	0.0313089	5.39305e-07
rostralmiddlefrontal-lh-lateralorbitofrontal-lh	0.0190913	0.00224635
rostralmiddlefrontal-lh-lateralorbitofrontal-rh	0.0773554	2.67183e-35
rostralmiddlefrontal-lh-lingual-lh	0.0296867	2.01431e-06
rostralmiddlefrontal-lh-lingual-rh	-0.0168791	0.00690358
rostralmiddlefrontal-lh-medialorbitofrontal-lh	0.0447301	7.95069e-13
rostralmiddlefrontal-lh-medialorbitofrontal-rh	0.0790122	9.28972e-37
rostralmiddlefrontal-lh-middletemporal-lh	0.0291468	3.07833e-06
rostralmiddlefrontal-lh-middletemporal-rh	0.0367136	4.16579e-09
rostralmiddlefrontal-lh-paracentral-lh	0.0307859	8.3065e-07
rostralmiddlefrontal-lh-paracentral-rh	0.19877	1.60306e-226
rostralmiddlefrontal-lh-parahippocampal-lh	0.158124	4.70991e-143
rostralmiddlefrontal-lh-parahippocampal-rh	0.111852	4.24744e-72
rostralmiddlefrontal-lh-parsopercularis-lh	0.102411	1.11601e-60
rostralmiddlefrontal-lh-parsopercularis-rh	0.141021	6.75895e-114
rostralmiddlefrontal-lh-parsorbitalis-lh	0.00656563	0.293374
rostralmiddlefrontal-lh-parsorbitalis-rh	0.0822285	1.11635e-39
rostralmiddlefrontal-lh-parstriangularis-lh	0.0806346	3.23243e-38
rostralmiddlefrontal-lh-parstriangularis-rh	0.0542471	3.69242e-18
rostralmiddlefrontal-lh-pericalcarine-lh	0.186627	1.8394e-199
rostralmiddlefrontal-lh-pericalcarine-rh	0.0532065	1.5819e-17
rostralmiddlefrontal-lh-postcentral-lh	0.111015	4.80864e-71
rostralmiddlefrontal-lh-postcentral-rh	0.0480198	1.47913e-14
rostralmiddlefrontal-lh-posteriorcingulate-lh	0.13892	1.49143e-110
rostralmiddlefrontal-lh-posteriorcingulate-rh	0.0973624	5.43827e-55
rostralmiddlefrontal-lh-precentral-lh	0.0589294	3.76268e-21
rostralmiddlefrontal-lh-precentral-rh	0.0190114	0.00234402
rostralmiddlefrontal-lh-precuneus-lh	0.00573929	0.358357
rostralmiddlefrontal-lh-precuneus-rh	0.164831	1.93133e-155
rostralmiddlefrontal-lh-rostralanteriorcingulate-lh	0.152818	1.23047e-133
rostralmiddlefrontal-lh-rostralanteriorcingulate-rh	-0.0167944	0.00719051
rostralmiddlefrontal-lh-rostralmiddlefrontal-lh	-0.0337156	6.76729e-08
rostralmiddlefrontal-rh-bankssts-lh	-0.141951	2.16199e-115
rostralmiddlefrontal-rh-bankssts-rh	-0.114251	3.66165e-75
rostralmiddlefrontal-rh-caudalanteriorcingulate-lh	-0.0353737	1.48896e-08
rostralmiddlefrontal-rh-caudalanteriorcingulate-rh	0.00684589	0.273254
rostralmiddlefrontal-rh-caudalmiddlefrontal-lh	0.0861204	2.28045e-43
rostralmiddlefrontal-rh-caudalmiddlefrontal-rh	-0.081788	2.84891e-39
rostralmiddlefrontal-rh-cuneus-lh	-0.021691	0.000517083
rostralmiddlefrontal-rh-cuneus-rh	-0.131324	6.72276e-99
rostralmiddlefrontal-rh-entorhinal-lh	0.139318	3.5048e-111
rostralmiddlefrontal-rh-entorhinal-rh	0.196472	2.93388e-221
rostralmiddlefrontal-rh-frontalpole-lh	0.0303719	1.16374e-06
rostralmiddlefrontal-rh-frontalpole-rh	0.0222195	0.000376022
rostralmiddlefrontal-rh-fusiform-lh	0.124476	5.68082e-89
rostralmiddlefrontal-rh-fusiform-rh	0.143096	3.00484e-117
rostralmiddlefrontal-rh-inferiorparietal-lh	0.0731691	9.44563e-32
rostralmiddlefrontal-rh-inferiorparietal-rh	-0.0962344	9.25767e-54
rostralmiddlefrontal-rh-inferiortemporal-lh	-0.0207334	0.000905207
rostralmiddlefrontal-rh-inferiortemporal-rh	-0.00146018	0.815233
rostralmiddlefrontal-rh-insula-lh	0.0870056	3.12475e-44
rostralmiddlefrontal-rh-insula-rh	0.0641483	8.98205e-25
rostralmiddlefrontal-rh-isthmuscingulate-lh	-0.0565949	1.25206e-19
rostralmiddlefrontal-rh-isthmuscingulate-rh	-0.0181692	0.00363788
rostralmiddlefrontal-rh-lateraloccipital-lh	-0.0842599	1.39084e-41
rostralmiddlefrontal-rh-lateraloccipital-rh	-0.0124679	0.046001
rostralmiddlefrontal-rh-lateralorbitofrontal-lh	0.0180512	0.00386385
rostralmiddlefrontal-rh-lateralorbitofrontal-rh	0.0252587	5.27838e-05
rostralmiddlefrontal-rh-lingual-lh	0.0317566	3.70586e-07
rostralmiddlefrontal-rh-lingual-rh	-0.0229396	0.000240994
rostralmiddlefrontal-rh-medialorbitofrontal-lh	0.0193754	0.0019284
rostralmiddlefrontal-rh-medialorbitofrontal-rh	-0.0047825	0.444048
rostralmiddlefrontal-rh-middletemporal-lh	-0.00316143	0.612896
rostralmiddlefrontal-rh-middletemporal-rh	0.00516026	0.408899
rostralmiddlefrontal-rh-paracentral-lh	-0.0150213	0.0162128
rostralmiddlefrontal-rh-paracentral-rh	-0.0112963	0.0706258
rostralmiddlefrontal-rh-parahippocampal-lh	-0.0491367	3.5923e-15
rostralmiddlefrontal-rh-parahippocampal-rh	0.0129268	0.0385605
rostralmiddlefrontal-rh-parsopercularis-lh	0.00117072	0.85138
rostralmiddlefrontal-rh-parsopercularis-rh	0.0208883	0.00082804
rostralmiddlefrontal-rh-parsorbitalis-lh	0.00219788	0.725033
rostralmiddlefrontal-rh-parsorbitalis-rh	0.0366877	4.27132e-09
rostralmiddlefrontal-rh-parstriangularis-lh	-0.0496835	1.77598e-15
rostralmiddlefrontal-rh-parstriangularis-rh	0.1581	5.19499e-143
rostralmiddlefrontal-rh-pericalcarine-lh	0.0455016	3.20084e-13
rostralmiddlefrontal-rh-pericalcarine-rh	0.0264043	2.37491e-05
rostralmiddlefrontal-rh-postcentral-lh	0.0604909	3.33886e-22
rostralmiddlefrontal-rh-postcentral-rh	0.0723761	4.21857e-31
rostralmiddlefrontal-rh-posteriorcingulate-lh	-2.87924e-05	0.996324
rostralmiddlefrontal-rh-posteriorcingulate-rh	-0.00405556	0.516314
rostralmiddlefrontal-rh-precentral-lh	0.00398487	0.523653
rostralmiddlefrontal-rh-precentral-rh	-0.0468746	6.10795e-14
rostralmiddlefrontal-rh-precuneus-lh	0.119741	1.99129e-82
rostralmiddlefrontal-rh-precuneus-rh	0.0328708	1.42549e-07
rostralmiddlefrontal-rh-rostralanteriorcingulate-lh	0.108911	1.97506e-68
rostralmiddlefrontal-rh-rostralanteriorcingulate-rh	0.043918	2.03819e-12
rostralmiddlefrontal-rh-rostralmiddlefrontal-lh	0.0675179	2.84025e-27
rostralmiddlefrontal-rh-rostralmiddlefrontal-rh	0.0282151	6.29232e-06
superiorfrontal-lh-bankssts-lh	-0.031118	6.31878e-07
superiorfrontal-lh-bankssts-rh	0.0404236	9.67939e-11
superiorfrontal-lh-caudalanteriorcingulate-lh	-0.0222606	0.000366726
superiorfrontal-lh-caudalanteriorcingulate-rh	0.088445	1.18118e-45
superiorfrontal-lh-caudalmiddlefrontal-lh	0.081838	2.56181e-39
superiorfrontal-lh-caudalmiddlefrontal-rh	-0.0915527	8.33668e-49
superiorfrontal-lh-cuneus-lh	-0.147749	5.94887e-125
superiorfrontal-lh-cuneus-rh	-0.162727	1.69526e-151
superiorfrontal-lh-entorhinal-lh	-0.152064	2.52088e-132
superiorfrontal-lh-entorhinal-rh	0.0342077	4.34884e-08
superiorfrontal-lh-frontalpole-lh	-0.0906786	6.5837e-48
superiorfrontal-lh-frontalpole-rh	0.00107909	0.862893
superiorfrontal-lh-fusiform-lh	-0.137742	1.05804e-108
superiorfrontal-lh-fusiform-rh	-0.127529	2.48698e-93
superiorfrontal-lh-inferiorparietal-lh	-0.172313	6.71088e-170
superiorfrontal-lh-inferiorparietal-rh	-0.163041	4.40562e-152
superiorfrontal-lh-inferiortemporal-lh	-0.11901	1.93858e-81
superiorfrontal-lh-inferiortemporal-rh	0.0638266	1.53257e-24
superiorfrontal-lh-insula-lh	-0.0910706	2.61297e-48
superiorfrontal-lh-insula-rh	-0.0131787	0.0349306
superiorfrontal-lh-isthmuscingulate-lh	-0.107092	3.26779e-66
superiorfrontal-lh-isthmuscingulate-rh	0.028636	4.56746e-06
superiorfrontal-lh-lateraloccipital-lh	0.0681847	8.78062e-28
superiorfrontal-lh-lateraloccipital-rh	0.016493	0.00829923
superiorfrontal-lh-lateralorbitofrontal-lh	-0.00614056	0.325745
superiorfrontal-lh-lateralorbitofrontal-rh	0.0461873	1.40795e-13
superiorfrontal-lh-lingual-lh	0.0699546	3.68427e-29
superiorfrontal-lh-lingual-rh	-0.0120823	0.0531525
superiorfrontal-lh-medialorbitofrontal-lh	0.0594176	1.77646e-21
superiorfrontal-lh-medialorbitofrontal-rh	0.00973993	0.119049
superiorfrontal-lh-middletemporal-lh	-0.0465883	8.6623e-14
superiorfrontal-lh-middletemporal-rh	0.0409255	5.66615e-11
superiorfrontal-lh-paracentral-lh	0.0612948	9.36341e-23
superiorfrontal-lh-paracentral-rh	-0.022032	0.000421354
superiorfrontal-lh-parahippocampal-lh	0.00836893	0.180456
superiorfrontal-lh-parahippocampal-rh	0.0553052	8.17543e-19
superiorfrontal-lh-parsopercularis-lh	0.00602217	0.33516
superiorfrontal-lh-parsopercularis-rh	0.0297846	1.86373e-06
superiorfrontal-lh-parsorbitalis-lh	-0.0710994	4.53783e-30
superiorfrontal-lh-parsorbitalis-rh	0.00823172	0.187707
superiorfrontal-lh-parstriangularis-lh	-0.0926	6.82978e-50
superiorfrontal-lh-parstriangularis-rh	-0.0202459	0.00119359
superiorfrontal-lh-pericalcarine-lh	0.011668	0.0618505
superiorfrontal-lh-pericalcarine-rh	0.0165809	0.00796102
superiorfrontal-lh-postcentral-lh	0.0293817	2.56179e-06
superiorfrontal-lh-postcentral-rh	0.0235709	0.000161485
superiorfrontal-lh-posteriorcingulate-lh	-0.0651766	1.59924e-25
superiorfrontal-lh-posteriorcingulate-rh	0.192316	6.5348e-212
superiorfrontal-lh-precentral-lh	0.196623	1.33013e-221
superiorfrontal-lh-precentral-rh	0.0512883	2.15051e-16
superiorfrontal-lh-precuneus-lh	0.0555164	6.03013e-19
superiorfrontal-lh-precuneus-rh	0.0834182	8.66937e-41
superiorfrontal-lh-rostralanteriorcingulate-lh	0.0157479	0.0117228
superiorfrontal-lh-rostralanteriorcingulate-rh	0.0918987	3.65953e-49
superiorfrontal-lh-rostralmiddlefrontal-lh	0.052585	3.72287e-17
superiorfrontal-lh-rostralmiddlefrontal-rh	0.0738483	2.58746e-32
superiorfrontal-lh-superiorfrontal-lh	0.17367	1.35421e-172
superiorfrontal-rh-bankssts-lh	0.0310288	6.80231e-07
superiorfrontal-rh-bankssts-rh	0.0564114	1.63934e-19
superiorfrontal-rh-caudalanteriorcingulate-lh	0.0990375	7.59663e-57
superiorfrontal-rh-caudalanteriorcingulate-rh	0.145293	7.47032e-121
superiorfrontal-rh-caudalmiddlefrontal-lh	0.054938	1.38417e-18
superiorfrontal-rh-caudalmiddlefrontal-rh	0.0313253	5.31964e-07
superiorfrontal-rh-cuneus-lh	0.0103226	0.0985287
superiorfrontal-rh-cuneus-rh	-0.0108146	0.0834905
superiorfrontal-rh-entorhinal-lh	0.119131	1.33135e-81
superiorfrontal-rh-entorhinal-rh	0.0635406	2.45931e-24
superiorfrontal-rh-frontalpole-lh	-0.0822582	1.04778e-39
superiorfrontal-rh-frontalpole-rh	-0.156887	7.92747e-141
superiorfrontal-rh-fusiform-lh	-0.143807	2.07453e-118
superiorfrontal-rh-fusiform-rh	-0.140338	8.36965e-113
superiorfrontal-rh-inferiorparietal-lh	-0.0465383	9.20441e-14
superiorfrontal-rh-inferiorparietal-rh	-0.0941084	1.76737e-51
superiorfrontal-rh-inferiortemporal-lh	-0.0324345	2.07981e-07
superiorfrontal-rh-inferiortemporal-rh	-0.0852881	1.45041e-42
superiorfrontal-rh-insula-lh	0.0203703	0.00111285
superiorfrontal-rh-insula-rh	-0.188608	9.46705e-204
superiorfrontal-rh-isthmuscingulate-lh	0.149623	3.97346e-128
superiorfrontal-rh-isthmuscingulate-rh	0.13417	3.46864e-103
superiorfrontal-rh-lateraloccipital-lh	0.0402772	1.13025e-10
superiorfrontal-rh-lateraloccipital-rh	0.0269561	1.59804e-05
superiorfrontal-rh-lateralorbitofrontal-lh	0.142185	9.02817e-116
superiorfrontal-rh-lateralorbitofrontal-rh	0.110916	6.41286e-71
superiorfrontal-rh-lingual-lh	-0.00215481	0.730209
superiorfrontal-rh-lingual-rh	-0.0164981	0.0082792
superiorfrontal-rh-medialorbitofrontal-lh	0.147817	4.57054e-125
superiorfrontal-rh-medialorbitofrontal-rh	0.127881	7.69415e-94
superiorfrontal-rh-middletemporal-lh	-0.0697392	5.44244e-29
superiorfrontal-rh-middletemporal-rh	0.0630475	5.52939e-24
superiorfrontal-rh-paracentral-lh	0.0505672	5.59867e-16
superiorfrontal-rh-paracentral-rh	0.0208124	0.000865048
superiorfrontal-rh-parahippocampal-lh	-0.0210439	0.000756745
superiorfrontal-rh-parahippocampal-rh	0.126754	3.2544e-92
superiorfrontal-rh-parsopercularis-lh	0.122099	1.18295e-85
superiorfrontal-rh-parsopercularis-rh	0.0484512	8.59499e-15
superiorfrontal-rh-parsorbitalis-lh	0.0573806	3.90904e-20
superiorfrontal-rh-parsorbitalis-rh	0.147332	2.98863e-124
superiorfrontal-rh-parstriangularis-lh	0.118083	3.39036e-80
superiorfrontal-rh-parstriangularis-rh	0.118664	5.66044e-81
superiorfrontal-rh-pericalcarine-lh	0.141948	2.18159e-115
superiorfrontal-rh-pericalcarine-rh	0.137791	8.8763e-109
superiorfrontal-rh-postcentral-lh	0.128403	1.34418e-94
superiorfrontal-rh-postcentral-rh	0.21091	2.0219e-255
superiorfrontal-rh-posteriorcingulate-lh	0.177571	1.8135e-180
superiorfrontal-rh-posteriorcingulate-rh	0.147397	2.32451e-124
superiorfrontal-rh-precentral-lh	0.141683	5.84128e-115
superiorfrontal-rh-precentral-rh	0.0600078	7.11115e-22
superiorfrontal-rh-precuneus-lh	0.0460888	1.58554e-13
superiorfrontal-rh-precuneus-rh	0.287732	0
superiorfrontal-rh-rostralanteriorcingulate-lh	0.18018	7.75259e-186
superiorfrontal-rh-rostralanteriorcingulate-rh	0.154731	5.42666e-137
superiorfrontal-rh-rostralmiddlefrontal-lh	0.227844	7.21814e-299
superiorfrontal-rh-rostralmiddlefrontal-rh	0.238333	0
superiorfrontal-rh-superiorfrontal-lh	0.139405	2.55277e-111
superiorfrontal-rh-superiorfrontal-rh	0.136251	2.21544e-106
superiorparietal-lh-bankssts-lh	0.190488	7.23938e-208
superiorparietal-lh-bankssts-rh	0.128071	4.08241e-94
superiorparietal-lh-caudalanteriorcingulate-lh	0.364016	0
superiorparietal-lh-caudalanteriorcingulate-rh	0.0883417	1.49703e-45
superiorparietal-lh-caudalmiddlefrontal-lh	0.198209	3.12697e-225
superiorparietal-lh-caudalmiddlefrontal-rh	0.158188	3.61125e-143
superiorparietal-lh-cuneus-lh	0.283813	0
superiorparietal-lh-cuneus-rh	0.130756	4.68814e-98
superiorparietal-lh-entorhinal-lh	0.108709	3.49362e-68
superiorparietal-lh-entorhinal-rh	0.114813	6.8545e-76
superiorparietal-lh-frontalpole-lh	0.00453345	0.468134
superiorparietal-lh-frontalpole-rh	0.19933	8.16616e-228
superiorparietal-lh-fusiform-lh	0.172251	8.8919e-170
superiorparietal-lh-fusiform-rh	0.119882	1.28459e-82
superiorparietal-lh-inferiorparietal-lh	0.0217682	0.000493795
superiorparietal-lh-inferiorparietal-rh	0.0162401	0.00934504
superiorparietal-lh-inferiortemporal-lh	0.0667527	1.07693e-26
superiorparietal-lh-inferiortemporal-rh	0.112798	2.68211e-73
superiorparietal-lh-insula-lh	0.101483	1.30496e-59
superiorparietal-lh-insula-rh	0.213734	2.06916e-262
superiorparietal-lh-isthmuscingulate-lh	-0.0109349	0.080114
superiorparietal-lh-isthmuscingulate-rh	0.00854708	0.171354
superiorparietal-lh-lateraloccipital-lh	-0.00996842	0.110635
superiorparietal-lh-lateraloccipital-rh	0.123047	5.72317e-87
superiorparietal-lh-lateralorbitofrontal-lh	0.228559	8.73477e-301
superiorparietal-lh-lateralorbitofrontal-rh	0.113635	2.27494e-74
superiorparietal-lh-lingual-lh	0.0885157	1.0044e-45
superiorparietal-lh-lingual-rh	0.192916	3.0105e-213
superiorparietal-lh-medialorbitofrontal-lh	0.0920295	2.67845e-49
superiorparietal-lh-medialorbitofrontal-rh	0.0119271	0.0562841
superiorparietal-lh-middletemporal-lh	-0.0100899	0.106357
superiorparietal-lh-middletemporal-rh	0.00380447	0.542622
superiorparietal-lh-paracentral-lh	-0.0037543	0.547956
superiorparietal-lh-paracentral-rh	-0.0269721	1.57954e-05
superiorparietal-lh-parahippocampal-lh	0.0247959	7.22217e-05
superiorparietal-lh-parahippocampal-rh	-0.0541625	4.16072e-18
superiorparietal-lh-parsopercularis-lh	-0.0434643	3.42363e-12
superiorparietal-lh-parsopercularis-rh	-0.00781306	0.211157
superiorparietal-lh-parsorbitalis-lh	0.0238311	0.000136531
superiorparietal-lh-parsorbitalis-rh	0.0202058	0.00122077
superiorparietal-lh-parstriangularis-lh	0.0630044	5.93286e-24
superiorparietal-lh-parstriangularis-rh	0.0302141	1.32178e-06
superiorparietal-lh-pericalcarine-lh	0.0272765	1.26527e-05
superiorparietal-lh-pericalcarine-rh	0.0680181	1.1787e-27
superiorparietal-lh-postcentral-lh	0.0655312	8.76401e-26
superiorparietal-lh-postcentral-rh	0.0620599	2.74958e-23
superiorparietal-lh-posteriorcingulate-lh	0.0548529	1.56296e-18
superiorparietal-lh-posteriorcingulate-rh	-0.0132905	0.0334157
superiorparietal-lh-precentral-lh	0.0547816	1.73022e-18
superiorparietal-lh-precentral-rh	-0.00385	0.537801
superiorparietal-lh-precuneus-lh	0.0462714	1.27203e-13
superiorparietal-lh-precuneus-rh	-0.0367653	3.9625e-09
superiorparietal-lh-rostralanteriorcingulate-lh	0.0402873	1.11828e-10
superiorparietal-lh-rostralanteriorcingulate-rh	0.0632366	4.05534e-24
superiorparietal-lh-rostralmiddlefrontal-lh	0.0292446	2.85207e-06
superiorparietal-lh-rostralmiddlefrontal-rh	0.0229741	0.000235838
superiorparietal-lh-superiorfrontal-lh	0.0445504	9.80537e-13
superiorparietal-lh-superiorfrontal-rh	0.0186539	0.00283069
superiorparietal-lh-superiorparietal-lh	0.0436792	2.67965e-12
superiorparietal-rh-bankssts-lh	0.0204406	0.0010695
superiorparietal-rh-bankssts-rh	0.00660278	0.290651
superiorparietal-rh-caudalanteriorcingulate-lh	0.0267617	1.83897e-05
superiorparietal-rh-caudalanteriorcingulate-rh	0.0638426	1.49252e-24
superiorparietal-rh-caudalmiddlefrontal-lh	0.128417	1.28347e-94
superiorparietal-rh-caudalmiddlefrontal-rh	0.0605612	2.98923e-22
superiorparietal-rh-cuneus-lh	0.0498008	1.52552e-15
superiorparietal-rh-cuneus-rh	0.0609643	1.58238e-22
superiorparietal-rh-entorhinal-lh	0.0299779	1.59759e-06
superiorparietal-rh-entorhinal-rh	0.0195807	0.00172487
superiorparietal-rh-frontalpole-lh	-0.0144545	0.0207026
superiorparietal-rh-frontalpole-rh	0.00896055	0.151561
superiorparietal-rh-fusiform-lh	0.022733	0.000274153
superiorparietal-rh-fusiform-rh	0.0359934	8.3074e-09
superiorparietal-rh-inferiorparietal-lh	0.0953681	7.98163e-53
superiorparietal-rh-inferiorparietal-rh	0.0231928	0.000205481
superiorparietal-rh-inferiortemporal-lh	0.055752	4.28839e-19
superiorparietal-rh-inferiortemporal-rh	0.0531515	1.70723e-17
superiorparietal-rh-insula-lh	0.0738198	2.73287e-32
superiorparietal-rh-insula-rh	0.00219216	0.72572
superiorparietal-rh-isthmuscingulate-lh	0.0240687	0.000116957
superiorparietal-rh-isthmuscingulate-rh	0.0854967	9.13692e-43
superiorparietal-rh-lateraloccipital-lh	0.00334161	0.592802
superiorparietal-rh-lateraloccipital-rh	-0.0376013	1.74747e-09
superiorparietal-rh-lateralorbitofrontal-lh	0.0152802	0.0144639
superiorparietal-rh-lateralorbitofrontal-rh	-0.0061952	0.321459
superiorparietal-rh-lingual-lh	-0.0872102	1.96828e-44
superiorparietal-rh-lingual-rh	-0.0595113	1.53702e-21
superiorparietal-rh-medialorbitofrontal-lh	-0.00698834	0.263396
superiorparietal-rh-medialorbitofrontal-rh	0.0661795	2.89455e-26
superiorparietal-rh-middletemporal-lh	0.00836513	0.180654
superiorparietal-rh-middletemporal-rh	0.0680187	1.17737e-27
superiorparietal-rh-paracentral-lh	0.134196	3.15992e-103
superiorparietal-rh-paracentral-rh	0.0223111	0.000355601
superiorparietal-rh-parahippocampal-lh	0.0149665	0.0166063
superiorparietal-rh-parahippocampal-rh	-0.0265622	2.12199e-05
superiorparietal-rh-parsopercularis-lh	0.0311842	5.98154e-07
superiorparietal-rh-parsopercularis-rh	0.0574132	3.7238e-20
superiorparietal-rh-parsorbitalis-lh	0.0624175	1.54275e-23
superiorparietal-rh-parsorbitalis-rh	0.0589537	3.62518e-21
superiorparietal-rh-parstriangularis-lh	0.0517654	1.13356e-16
superiorparietal-rh-parstriangularis-rh	0.1506	8.47085e-130
superiorparietal-rh-pericalcarine-lh	0.0324077	2.12831e-07
superiorparietal-rh-pericalcarine-rh	0.0494771	2.319e-15
superiorparietal-rh-postcentral-lh	0.101354	1.83034e-59
superiorparietal-rh-postcentral-rh	0.147536	1.35964e-124
superiorparietal-rh-posteriorcingulate-lh	0.0789589	1.03614e-36
superiorparietal-rh-posteriorcingulate-rh	0.144517	1.42279e-119
superiorparietal-rh-precentral-lh	0.122855	1.05836e-86
superiorparietal-rh-precentral-rh	0.0674722	3.07648e-27
superiorparietal-rh-precuneus-lh	0.0645771	4.38833e-25
superiorparietal-rh-precuneus-rh	0.0758294	5.53502e-34
superiorparietal-rh-rostralanteriorcingulate-lh	0.0750591	2.49796e-33
superiorparietal-rh-rostralanteriorcingulate-rh	0.172157	1.36374e-169
superiorparietal-rh-rostralmiddlefrontal-lh	0.119429	5.26715e-82
superiorparietal-rh-rostralmiddlefrontal-rh	0.144858	3.90294e-120
superiorparietal-rh-superiorfrontal-lh	0.0915762	7.88522e-49
superiorparietal-rh-superiorfrontal-rh	0.125966	4.37863e-91
superiorparietal-rh-superiorparietal-lh	0.0683752	6.26601e-28
superiorparietal-rh-superiorparietal-rh	0.131437	4.54752e-99
superiortemporal-lh-bankssts-lh	0.161068	2.00489e-148
superiortemporal-lh-bankssts-rh	0.144352	2.64923e-119
superiortemporal-lh-caudalanteriorcingulate-lh	0.216276	8.6559e-269
superiortemporal-lh-caudalanteriorcingulate-rh	0.104478	4.32083e-63
superiortemporal-lh-caudalmiddlefrontal-lh	0.197231	5.45171e-223
superiortemporal-lh-caudalmiddlefrontal-rh	0.246521	0
superiortemporal-lh-cuneus-lh	0.204562	4.44885e-240
superiortemporal-lh-cuneus-rh	0.0747006	5.01071e-33
superiortemporal-lh-entorhinal-lh	0.0543303	3.28297e-18
superiortemporal-lh-entorhinal-rh	0.0481046	1.32994e-14
superiortemporal-lh-frontalpole-lh	0.0210122	0.000770771
superiortemporal-lh-frontalpole-rh	0.0935686	6.58064e-51
superiortemporal-lh-fusiform-lh	0.0745766	6.37001e-33
superiortemporal-lh-fusiform-rh	0.0736683	3.65103e-32
superiortemporal-lh-inferiorparietal-lh	0.0165459	0.00809408
superiortemporal-lh-inferiorparietal-rh	0.0971021	1.0492e-54
superiortemporal-lh-inferiortemporal-lh	0.0961162	1.24356e-53
superiortemporal-lh-inferiortemporal-rh	0.120019	8.36134e-83
superiortemporal-lh-insula-lh	0.0153171	0.014229
superiortemporal-lh-insula-rh	0.0730616	1.15796e-31
superiortemporal-lh-isthmuscingulate-lh	0.0863674	1.31222e-43
superiortemporal-lh-isthmuscingulate-rh	0.0110468	0.0770722
superiortemporal-lh-lateraloccipital-lh	0.0383881	7.95916e-10
superiortemporal-lh-lateraloccipital-rh	0.168714	7.34901e-163
superiortemporal-lh-lateralorbitofrontal-lh	0.178021	2.18719e-181
superiortemporal-lh-lateralorbitofrontal-rh	0.183908	1.18704e-193
superiortemporal-lh-lingual-lh	0.0195308	0.00177244
superiortemporal-lh-lingual-rh	0.160454	2.69566e-147
superiortemporal-lh-medialorbitofrontal-lh	0.19713	9.28663e-223
superiortemporal-lh-medialorbitofrontal-rh	0.00657858	0.292424
superiortemporal-lh-middletemporal-lh	0.0477787	1.99925e-14
superiortemporal-lh-middletemporal-rh	-0.0549705	1.32124e-18
superiortemporal-lh-paracentral-lh	-0.0108772	0.0817205
superiortemporal-lh-paracentral-rh	-0.0415601	2.85258e-11
superiortemporal-lh-parahippocampal-lh	0.016681	0.00759082
superiortemporal-lh-parahippocampal-rh	0.026295	2.56655e-05
superiortemporal-lh-parsopercularis-lh	-0.0345893	3.07372e-08
superiortemporal-lh-parsopercularis-rh	0.00338609	0.587889
superiortemporal-lh-parsorbitalis-lh	0.108961	1.7124e-68
superiortemporal-lh-parsorbitalis-rh	0.179883	3.20323e-185
superiortemporal-lh-parstriangularis-lh	0.0108182	0.0833902
superiortemporal-lh-parstriangularis-rh	0.0533298	1.33331e-17
superiortemporal-lh-pericalcarine-lh	0.04305	5.47266e-12
superiortemporal-lh-pericalcarine-rh	0.0862873	1.5702e-43
superiortemporal-lh-postcentral-lh	-0.023356	0.000185266
superiortemporal-lh-postcentral-rh	0.0853809	1.181e-42
superiortemporal-lh-posteriorcingulate-lh	0.120801	7.20572e-84
superiortemporal-lh-posteriorcingulate-rh	0.0661868	2.85819e-26
superiortemporal-lh-precentral-lh	0.0567526	9.92379e-20
superiortemporal-lh-precentral-rh	0.0639937	1.16163e-24
superiortemporal-lh-precuneus-lh	-0.00670413	0.28331
superiortemporal-lh-precuneus-rh	0.195914	5.42094e-220
superiortemporal-lh-rostralanteriorcingulate-lh	0.12784	8.81652e-94
superiortemporal-lh-rostralanteriorcingulate-rh	0.131241	8.92365e-99
superiortemporal-lh-rostralmiddlefrontal-lh	0.0830317	1.99665e-40
superiortemporal-lh-rostralmiddlefrontal-rh	0.11603	1.77036e-77
superiortemporal-lh-superiorfrontal-lh	0.0760346	3.69497e-34
superiortemporal-lh-superiorfrontal-rh	0.0777705	1.15935e-35
superiortemporal-lh-superiorparietal-lh	0.149897	1.35849e-128
superiortemporal-lh-superiorparietal-rh	0.112624	4.46415e-73
superiortemporal-lh-superiortemporal-lh	0.151493	2.45368e-131
superiortemporal-rh-bankssts-lh	0.137803	8.50895e-109
superiortemporal-rh-bankssts-rh	0.216102	2.38281e-268
superiortemporal-rh-caudalanteriorcingulate-lh	0.257075	0
superiortemporal-rh-caudalanteriorcingulate-rh	0.146404	1.06784e-122
superiortemporal-rh-caudalmiddlefrontal-lh	0.0403341	1.06419e-10
superiortemporal-rh-caudalmiddlefrontal-rh	-0.0116268	0.0627774
superiortemporal-rh-cuneus-lh	0.0324704	2.01665e-07
superiortemporal-rh-cuneus-rh	0.00488029	0.434787
superiortemporal-rh-entorhinal-lh	0.103291	1.06345e-61
superiortemporal-rh-entorhinal-rh	0.0701253	2.70191e-29
superiortemporal-rh-frontalpole-lh	0.0130754	0.0363832
superiortemporal-rh-frontalpole-rh	-0.113301	6.09646e-74
superiortemporal-rh-fusiform-lh	0.0230289	0.000227856
superiortemporal-rh-fusiform-rh	0.027959	7.62948e-06
superiortemporal-rh-inferiorparietal-lh	0.137676	1.34123e-108
superiortemporal-rh-inferiorparietal-rh	-0.0267226	1.89145e-05
superiortemporal-rh-inferiortemporal-lh	0.0552482	8.87394e-19
superiortemporal-rh-inferiortemporal-rh	0.0615995	5.75796e-23
superiortemporal-rh-insula-lh	0.0141999	0.0230495
superiortemporal-rh-insula-rh	-0.168332	4.01429e-162
superiortemporal-rh-isthmuscingulate-lh	0.0766212	1.15716e-34
superiortemporal-rh-isthmuscingulate-rh	0.0427146	7.97539e-12
superiortemporal-rh-lateraloccipital-lh	0.151728	9.61938e-132
superiortemporal-rh-lateraloccipital-rh	-0.100906	5.93927e-59
superiortemporal-rh-lateralorbitofrontal-lh	0.0244588	9.04546e-05
superiortemporal-rh-lateralorbitofrontal-rh	0.00544545	0.383495
superiortemporal-rh-lingual-lh	-0.0353611	1.50649e-08
superiortemporal-rh-lingual-rh	0.0831484	1.55262e-40
superiortemporal-rh-medialorbitofrontal-lh	-0.0276232	9.79936e-06
superiortemporal-rh-medialorbitofrontal-rh	0.0716934	1.51042e-30
superiortemporal-rh-middletemporal-lh	-0.0783574	3.53424e-36
superiortemporal-rh-middletemporal-rh	0.163326	1.29634e-152
superiortemporal-rh-paracentral-lh	0.10542	3.30584e-64
superiortemporal-rh-paracentral-rh	-0.00161665	0.795849
superiortemporal-rh-parahippocampal-lh	0.0711687	3.99321e-30
superiortemporal-rh-parahippocampal-rh	0.114857	6.01795e-76
superiortemporal-rh-parsopercularis-lh	0.0877604	5.64682e-45
superiortemporal-rh-parsopercularis-rh	0.0656854	6.74085e-26
superiortemporal-rh-parsorbitalis-lh	0.0944078	8.49709e-52
superiortemporal-rh-parsorbitalis-rh	0.0903406	1.45602e-47
superiortemporal-rh-parstriangularis-lh	0.07844	2.9877e-36
superiortemporal-rh-parstriangularis-rh	0.0158627	0.0111245
superiortemporal-rh-pericalcarine-lh	0.131205	1.00934e-98
superiortemporal-rh-pericalcarine-rh	0.0826214	4.82064e-40
superiortemporal-rh-postcentral-lh	0.0985702	2.5196e-56
superiortemporal-rh-postcentral-rh	0.0434174	3.61107e-12
superiortemporal-rh-posteriorcingulate-lh	-0.0130878	0.0362054
superiortemporal-rh-posteriorcingulate-rh	0.216405	4.07426e-269
superiortemporal-rh-precentral-lh	0.128841	3.08817e-95
superiortemporal-rh-precentral-rh	0.147343	2.86309e-124
superiortemporal-rh-precuneus-lh	0.147403	2.27104e-124
superiortemporal-rh-precuneus-rh	0.181047	1.22337e-187
superiortemporal-rh-rostralanteriorcingulate-lh	0.111398	1.58964e-71
superiortemporal-rh-rostralanteriorcingulate-rh	0.0693223	1.15452e-28
superiortemporal-rh-rostralmiddlefrontal-lh	0.112262	1.2878e-72
superiortemporal-rh-rostralmiddlefrontal-rh	0.096826	2.10225e-54
superiortemporal-rh-superiorfrontal-lh	0.287766	0
superiortemporal-rh-superiorfrontal-rh	0.0922625	1.53414e-49
superiortemporal-rh-superiorparietal-lh	0.170078	1.65091e-165
superiortemporal-rh-superiorparietal-rh	0.133366	5.77154e-102
superiortemporal-rh-superiortemporal-lh	0.162652	2.3403e-151
superiortemporal-rh-superiortemporal-rh	0.0452831	4.14805e-13
supramarginal-lh-bankssts-lh	0.0501118	1.01754e-15
supramarginal-lh-bankssts-rh	0.084434	9.50142e-42
supramarginal-lh-caudalanteriorcingulate-lh	-0.0492108	3.26663e-15
supramarginal-lh-caudalanteriorcingulate-rh	0.140012	2.76547e-112
supramarginal-lh-caudalmiddlefrontal-lh	0.0955202	5.47612e-53
supramarginal-lh-caudalmiddlefrontal-rh	0.00831079	0.183503
supramarginal-lh-cuneus-lh	-0.0474462	3.02207e-14
supramarginal-lh-cuneus-rh	-0.146482	7.89765e-123
supramarginal-lh-entorhinal-lh	-0.0752344	1.77505e-33
supramarginal-lh-entorhinal-rh	0.0560948	2.60485e-19
supramarginal-lh-frontalpole-lh	0.0254919	4.49821e-05
supramarginal-lh-frontalpole-rh	0.106803	7.29236e-66
supramarginal-lh-fusiform-lh	-0.0934111	9.64232e-51
supramarginal-lh-fusiform-rh	0.00158243	0.800079
supramarginal-lh-inferiorparietal-lh	-0.0644722	5.23148e-25
supramarginal-lh-inferiorparietal-rh	0.116693	2.37196e-78
supramarginal-lh-inferiortemporal-lh	0.252743	0
supramarginal-lh-inferiortemporal-rh	0.0789262	1.1078e-36
supramarginal-lh-insula-lh	0.0441051	1.64323e-12
supramarginal-lh-insula-rh	0.192559	1.87943e-212
supramarginal-lh-isthmuscingulate-lh	0.131461	4.19778e-99
supramarginal-lh-isthmuscingulate-rh	-0.00159272	0.798806
supramarginal-lh-lateraloccipital-lh	0.003592	0.565392
supramarginal-lh-lateraloccipital-rh	0.00269214	0.666585
supramarginal-lh-lateralorbitofrontal-lh	0.000294742	0.962378
supramarginal-lh-lateralorbitofrontal-rh	-0.0818444	2.52754e-39
supramarginal-lh-lingual-lh	-0.170963	3.06433e-167
supramarginal-lh-lingual-rh	-0.0591786	2.56715e-21
supramarginal-lh-medialorbitofrontal-lh	-0.0157345	0.011794
supramarginal-lh-medialorbitofrontal-rh	0.0306447	9.32332e-07
supramarginal-lh-middletemporal-lh	-0.00152528	0.807154
supramarginal-lh-middletemporal-rh	0.0135024	0.0306974
supramarginal-lh-paracentral-lh	0.00754687	0.227129
supramarginal-lh-paracentral-rh	0.00178564	0.775056
supramarginal-lh-parahippocampal-lh	-0.0278517	8.26733e-06
supramarginal-lh-parahippocampal-rh	-0.0963836	6.37616e-54
supramarginal-lh-parsopercularis-lh	0.0304108	1.12766e-06
supramarginal-lh-parsopercularis-rh	0.0193266	0.00197988
supramarginal-lh-parsorbitalis-lh	-0.0107888	0.0842316
supramarginal-lh-parsorbitalis-rh	0.0441993	1.47375e-12
supramarginal-lh-parstriangularis-lh	-0.10083	7.24284e-59
supramarginal-lh-parstriangularis-rh	0.155418	3.29849e-138
supramarginal-lh-pericalcarine-lh	0.0533347	1.32445e-17
supramarginal-lh-pericalcarine-rh	0.040587	8.13673e-11
supramarginal-lh-postcentral-lh	0.0597811	1.01175e-21
[truncated: 1,572 more rows]

## Sheet: Figure 5 rsMRI
Network-level feature importance for functional connectivity (full correlations) between 55 neuronally driven independent components (IC) grouped into seven networks (Yeo 2011 parcellation).				Independent component (IC) assignment to resting-state networks. Each IC was assigned to the network with which it showed the highest spatial correlation. Activation values represent the correlation strength (z-score) between each IC and its assigned network.
Connection	Correlation with predicted g-factor	p-value		IC	Network	Activation
IC1-IC2	-0.0351956	9.04196e-09		IC2	Visual	0.922145
IC1-IC3	0.0192285	0.00169225		IC3	Ventral Attention	1.39588
IC2-IC3	-0.00133252	0.827782		IC4	Visual	1.01755
IC1-IC4	0.0592669	3.51353e-22		IC5	Visual	0.447842
IC2-IC4	-0.0494183	6.86423e-16		IC6	Default Mode	0.638662
IC3-IC4	0.0309292	4.40242e-07		IC7	Somatomotor	0.739368
IC1-IC5	-0.0550885	2.24637e-19		IC8	Default Mode	0.619435
IC2-IC5	0.0605259	4.57885e-23		IC9	Visual	0.475548
IC3-IC5	-0.0830871	4.70454e-42		IC10	Default Mode	0.487923
IC4-IC5	0.0387843	2.38467e-10		IC11	Limbic	-0.203607
IC1-IC6	-0.00665099	0.277547		IC12	Default Mode	0.39343
IC2-IC6	-0.0461031	5.04495e-14		IC13	Frontoparietal	0.689135
IC3-IC6	-0.000317114	0.958711		IC14	Default Mode	0.559236
IC4-IC6	0.0582503	1.76606e-21		IC15	Visual	0.416691
IC5-IC6	-0.0225347	0.000233729		IC16	Ventral Attention	0.673548
IC1-IC7	-0.0559658	6.01338e-20		IC17	Visual	0.458261
IC2-IC7	0.0260933	2.03789e-05		IC18	Frontoparietal	-0.230287
IC3-IC7	-0.0350391	1.05148e-08		IC19	Dorsal Attention	0.837894
IC4-IC7	-0.0119359	0.0513305		IC20	Frontoparietal	0.245049
IC5-IC7	0.0162113	0.0081253		IC21	Somatomotor	0.723403
IC6-IC7	-0.123477	4.69274e-91		IC22	Default Mode	0.521231
IC1-IC8	-0.0781374	2.22755e-37		IC23	Somatomotor	0.876748
IC2-IC8	0.00211743	0.729576		IC24	Limbic	-0.269491
IC3-IC8	-0.0535997	2.00637e-18		IC25	Dorsal Attention	0.474449
IC4-IC8	-0.0889288	6.07882e-48		IC26	Frontoparietal	0.593212
IC5-IC8	0.0123333	0.044052		IC27	Dorsal Attention	0.710079
IC6-IC8	-0.0318372	2.00332e-07		IC28	Ventral Attention	0.605061
IC7-IC8	0.067187	4.70181e-28		IC29	Ventral Attention	0.426602
IC1-IC9	0.0273557	7.93585e-06		IC30	Ventral Attention	0.219141
IC2-IC9	0.0338797	3.15254e-08		IC31	Somatomotor	0.913469
IC3-IC9	0.0674511	2.90963e-28		IC32	Frontoparietal	0.570847
IC4-IC9	0.105123	2.23208e-66		IC33	Somatomotor	0.727723
IC5-IC9	-0.0193435	0.00158691		IC34	Ventral Attention	0.430609
IC6-IC9	0.0636863	2.28129e-25		IC35	Dorsal Attention	0.752963
IC7-IC9	0.0628635	9.30745e-25		IC36	Somatomotor	0.735866
IC8-IC9	-0.0149095	0.0149226		IC37	Default Mode	0.210391
IC1-IC10	-0.00557448	0.362775		IC38	Frontoparietal	0.705718
IC2-IC10	0.0553869	1.43823e-19		IC39	Limbic	-0.396476
IC3-IC10	0.0218307	0.000364567		IC40	Dorsal Attention	0.999519
IC4-IC10	0.0516031	3.44806e-17		IC41	Frontoparietal	0.372938
IC5-IC10	-0.00806013	0.188204		IC42	Visual	0.413565
IC6-IC10	-0.0605439	4.44578e-23		IC43	Dorsal Attention	0.459775
IC7-IC10	-0.153402	4.72418e-140		IC45	Limbic	1.53983
IC8-IC10	0.016613	0.00667953		IC46	Frontoparietal	0.382184
IC9-IC10	-0.0674433	2.95128e-28		IC48	Limbic	-0.340368
IC1-IC11	-0.0388575	2.20654e-10		IC49	Frontoparietal	0.171488
IC2-IC11	0.0452431	1.46696e-13		IC50	Frontoparietal	0.387123
IC3-IC11	-0.0421825	5.58973e-12		IC52	Visual	-0.209107
IC4-IC11	-0.0138391	0.0238549		IC53	Default Mode	0.258416
IC5-IC11	-0.123586	3.25788e-91		IC57	Limbic	0.609835
IC6-IC11	-0.0490015	1.19721e-15		IC58	Limbic	0.150737
IC7-IC11	-0.0681979	7.41443e-29		IC60	Limbic	-0.192574
IC8-IC11	0.0772632	1.39239e-36		IC63	Limbic	0.570187
IC9-IC11	-0.0855041	1.92668e-44		IC64	Limbic	0.253188
IC10-IC11	-0.138243	7.32867e-114		IC93	Limbic	-0.189952
IC1-IC12	-0.00583939	0.340417
IC2-IC12	0.0188638	0.00207027
IC3-IC12	-0.0241138	8.23784e-05
IC4-IC12	0.0126388	0.0390677
IC5-IC12	-0.116887	9.95323e-82
IC6-IC12	0.00186232	0.761097
IC7-IC12	-0.0647316	3.72464e-26
IC8-IC12	0.0329321	7.535e-08
IC9-IC12	-0.0561054	4.8667e-20
IC10-IC12	-0.0711155	3.07741e-31
IC11-IC12	0.0477961	5.82829e-15
IC1-IC13	-0.0545193	5.2244e-19
IC2-IC13	0.0106562	0.0819001
IC3-IC13	-0.0280045	4.81044e-06
IC4-IC13	0.0436601	9.94178e-13
IC5-IC13	-0.0767852	3.75942e-36
IC6-IC13	-0.0319583	1.80074e-07
IC7-IC13	0.0444924	3.66526e-13
IC8-IC13	0.0318829	1.92435e-07
IC9-IC13	-0.0238202	0.000100486
IC10-IC13	-0.0598162	1.45176e-22
IC11-IC13	-0.0323546	1.26693e-07
IC12-IC13	-0.0255298	3.06408e-05
IC1-IC14	-0.0780474	2.69309e-37
IC2-IC14	0.00113404	0.853117
IC3-IC14	-0.0344984	1.76228e-08
IC4-IC14	-0.0283071	3.7947e-06
IC5-IC14	-0.0846561	1.34991e-43
IC6-IC14	-0.011827	0.0534918
IC7-IC14	-0.0536828	1.77831e-18
IC8-IC14	-0.0421106	6.0702e-12
IC9-IC14	0.03213	1.54711e-07
IC10-IC14	-0.0141332	0.0210274
IC11-IC14	-0.0291233	1.97806e-06
IC12-IC14	-0.0129284	0.0347922
IC13-IC14	-0.0543394	6.8096e-19
IC1-IC15	-0.0316789	2.30169e-07
IC2-IC15	0.0597668	1.57253e-22
IC3-IC15	-0.0377165	7.28584e-10
IC4-IC15	-0.0304301	6.72506e-07
IC5-IC15	0.0205286	0.000802798
IC6-IC15	-0.0814239	1.88635e-40
IC7-IC15	0.125043	2.39391e-93
IC8-IC15	-0.0168418	0.00596377
IC9-IC15	0.0118699	0.0526301
IC10-IC15	-0.00570031	0.352043
IC11-IC15	0.165325	1.1823e-162
IC12-IC15	0.0409574	2.23975e-11
IC13-IC15	0.0162156	0.00810858
IC14-IC15	-0.0419982	6.90523e-12
IC1-IC16	0.0059643	0.330188
IC2-IC16	-0.00163095	0.790033
IC3-IC16	-0.0238826	9.63484e-05
IC4-IC16	-0.0655034	9.58906e-27
IC5-IC16	-0.000682531	0.911276
IC6-IC16	-0.0343619	2.00528e-08
IC7-IC16	0.0031161	0.61094
IC8-IC16	0.0964654	3.90443e-56
IC9-IC16	0.0354788	6.87029e-09
IC10-IC16	-0.0263763	1.65547e-05
IC11-IC16	0.00466153	0.446633
IC12-IC16	-0.00886081	0.147999
IC13-IC16	0.0393273	1.336e-10
IC14-IC16	0.056836	1.59453e-20
IC15-IC16	-0.0371174	1.34581e-09
IC1-IC17	-0.0518304	2.50797e-17
IC2-IC17	0.0638644	1.67868e-25
IC3-IC17	-0.0096279	0.115979
IC4-IC17	0.0690099	1.64855e-29
IC5-IC17	-0.122361	1.93914e-89
IC6-IC17	0.0437644	8.7827e-13
IC7-IC17	-0.035234	8.71249e-09
IC8-IC17	-0.0366358	2.18888e-09
IC9-IC17	-0.113959	9.42092e-78
IC10-IC17	0.0138184	0.0240649
IC11-IC17	-0.129399	6.98483e-100
IC12-IC17	-0.0673561	3.45825e-28
IC13-IC17	-0.106293	7.88877e-68
IC14-IC17	-0.01719	0.0050063
IC15-IC17	-0.0598353	1.40775e-22
IC16-IC17	0.0233633	0.000136298
IC1-IC18	0.0853315	2.86782e-44
IC2-IC18	-0.0436511	1.00496e-12
IC3-IC18	0.0401579	5.42473e-11
IC4-IC18	-0.0383373	3.81986e-10
IC5-IC18	0.0924129	1.20274e-51
IC6-IC18	0.0784137	1.24294e-37
IC7-IC18	0.106692	2.49538e-68
IC8-IC18	-0.00294436	0.630734
IC9-IC18	0.0791626	2.53e-38
IC10-IC18	0.223162	4.71527e-298
IC11-IC18	0.110602	2.54612e-73
IC12-IC18	-0.0608339	2.76368e-23
IC13-IC18	0.0823744	2.30913e-41
IC14-IC18	0.060906	2.45455e-23
IC15-IC18	-0.11978	9.30155e-86
IC16-IC18	-0.00384209	0.53049
IC17-IC18	0.100939	2.57068e-61
IC1-IC19	-0.0210862	0.000575537
IC2-IC19	0.114166	4.96762e-78
IC3-IC19	0.0052161	0.394446
IC4-IC19	0.0235037	0.00012418
IC5-IC19	0.0368904	1.69376e-09
IC6-IC19	-0.0724269	2.42741e-32
IC7-IC19	0.135601	1.38444e-109
IC8-IC19	-0.0312896	3.22921e-07
IC9-IC19	-0.0419237	7.5189e-12
IC10-IC19	-0.0326428	9.7865e-08
IC11-IC19	0.0449644	2.06433e-13
IC12-IC19	-0.0955218	4.50995e-55
IC13-IC19	-0.00416401	0.496622
IC14-IC19	-0.0526206	8.20108e-18
IC15-IC19	0.0707545	6.14104e-31
IC16-IC19	-0.0134028	0.0286537
IC17-IC19	-0.0473582	1.02598e-14
IC18-IC19	-0.0166106	0.00668736
IC1-IC20	0.0898995	5.83915e-49
IC2-IC20	-0.0686057	3.49215e-29
IC3-IC20	0.0553561	1.50614e-19
IC4-IC20	0.0124504	0.0420813
IC5-IC20	0.0252039	3.8648e-05
IC6-IC20	0.0848449	8.76644e-44
IC7-IC20	0.0332474	5.65297e-08
IC8-IC20	0.022231	0.00028357
IC9-IC20	0.138059	1.46485e-113
IC10-IC20	-0.0475543	7.96986e-15
IC11-IC20	-0.0279408	5.05524e-06
IC12-IC20	-0.0496303	5.16343e-16
IC13-IC20	0.118025	2.66329e-83
IC14-IC20	0.106217	9.79385e-68
IC15-IC20	-0.0160406	0.00882053
IC16-IC20	0.0187936	0.00215138
IC17-IC20	0.0720862	4.71658e-32
IC18-IC20	-0.0187964	0.00214807
IC19-IC20	-0.0411813	1.74303e-11
IC1-IC21	-0.0400223	6.29239e-11
IC2-IC21	-0.0554754	1.25933e-19
IC3-IC21	-0.0201678	0.00099156
IC4-IC21	0.0279579	4.98854e-06
IC5-IC21	0.0157446	0.0101521
IC6-IC21	-0.0221146	0.000305203
IC7-IC21	0.114694	9.67636e-79
IC8-IC21	0.0557779	7.98796e-20
IC9-IC21	-0.0747328	2.49468e-34
IC10-IC21	-0.00663871	0.278435
IC11-IC21	0.0459142	6.38832e-14
IC12-IC21	0.0298891	1.0568e-06
IC13-IC21	0.0838522	8.39611e-43
IC14-IC21	-0.036408	2.74927e-09
IC15-IC21	0.0529785	4.91621e-18
IC16-IC21	0.0428369	2.62013e-12
IC17-IC21	-0.093093	2.18985e-52
IC18-IC21	0.0617729	5.83573e-24
IC19-IC21	0.0251754	3.94362e-05
IC20-IC21	0.108599	9.6853e-71
IC1-IC22	-0.060069	9.63946e-23
IC2-IC22	-0.0786782	7.0965e-38
IC3-IC22	-0.0267626	1.24236e-05
IC4-IC22	4.70326e-05	0.993874
IC5-IC22	0.0144712	0.0181434
IC6-IC22	-0.0146134	0.0170377
IC7-IC22	-0.0335086	4.44685e-08
IC8-IC22	0.00718685	0.240662
IC9-IC22	0.04943	6.75697e-16
IC10-IC22	-0.0440531	6.22091e-13
IC11-IC22	0.0208109	0.000678979
IC12-IC22	0.0239217	9.38389e-05
IC13-IC22	0.0327479	8.90213e-08
IC14-IC22	-0.0295319	1.41845e-06
IC15-IC22	-0.00127854	0.834656
IC16-IC22	-0.0372985	1.11897e-09
IC17-IC22	0.045696	8.38157e-14
IC18-IC22	-0.0768618	3.20757e-36
IC19-IC22	-0.0468836	1.88289e-14
IC20-IC22	0.00590979	0.334627
IC21-IC22	-0.00570589	0.351572
IC1-IC23	-0.0528818	5.64742e-18
IC2-IC23	0.15204	1.38896e-137
IC3-IC23	-0.0217356	0.00038677
IC4-IC23	-0.016819	0.00603175
IC5-IC23	-0.058772	7.73771e-22
IC6-IC23	-0.0492351	8.77006e-16
IC7-IC23	0.0715283	1.39033e-31
IC8-IC23	-0.0371555	1.29464e-09
IC9-IC23	-0.131963	7.74339e-104
IC10-IC23	0.0966148	2.6451e-56
IC11-IC23	0.00111545	0.855499
IC12-IC23	-0.00565973	0.355482
IC13-IC23	-0.0773608	1.13594e-36
IC14-IC23	-0.0203272	0.000903577
IC15-IC23	0.0148029	0.0156556
IC16-IC23	0.0130631	0.032945
IC17-IC23	-0.0642096	9.24219e-26
IC18-IC23	-0.0221318	0.000301901
IC19-IC23	0.0539756	1.16071e-18
IC20-IC23	-0.120343	1.49029e-86
IC21-IC23	-0.0965426	3.19284e-56
IC22-IC23	0.0452852	1.39276e-13
IC1-IC24	0.0452112	1.5255e-13
IC2-IC24	-0.006593	0.281758
IC3-IC24	-0.00983377	0.108386
IC4-IC24	-0.0392608	1.43488e-10
IC5-IC24	0.0629085	8.62276e-25
IC6-IC24	0.071225	2.49356e-31
IC7-IC24	-0.0025374	0.678688
IC8-IC24	-0.0522081	1.47281e-17
IC9-IC24	0.0731134	6.30633e-33
IC10-IC24	0.00975049	0.111409
IC11-IC24	0.020527	0.000803567
IC12-IC24	-0.035243	8.63767e-09
IC13-IC24	0.0161986	0.00817536
IC14-IC24	-0.0083694	0.171812
IC15-IC24	-0.0204011	0.000865335
IC16-IC24	-0.0290298	2.13321e-06
IC17-IC24	-0.00810698	0.185649
IC18-IC24	-0.132742	4.68895e-105
IC19-IC24	-0.0615657	8.24145e-24
IC20-IC24	-0.0397175	8.76812e-11
IC21-IC24	0.0573365	7.36321e-21
IC22-IC24	0.0895264	1.44154e-48
IC23-IC24	-0.062032	3.78351e-24
IC1-IC25	0.0536269	1.92881e-18
IC2-IC25	-0.126268	3.6672e-95
IC3-IC25	0.0250006	4.46091e-05
IC4-IC25	-0.024143	8.07572e-05
IC5-IC25	0.0938023	3.65722e-53
IC6-IC25	0.0516746	3.11986e-17
IC7-IC25	-0.0168017	0.00608386
IC8-IC25	-0.0452606	1.43569e-13
IC9-IC25	0.0386178	2.84401e-10
IC10-IC25	0.0489837	1.22576e-15
IC11-IC25	0.0598633	1.34528e-22
IC12-IC25	0.046439	3.30775e-14
IC13-IC25	0.0441374	5.62214e-13
IC14-IC25	-0.00624726	0.307761
IC15-IC25	-0.0183849	0.00268429
IC16-IC25	-0.0330704	6.64497e-08
IC17-IC25	0.0107436	0.0794224
IC18-IC25	-0.146961	1.40631e-128
IC19-IC25	-0.111981	3.99097e-75
IC20-IC25	0.0122233	0.0459731
IC21-IC25	0.000445262	0.94205
IC22-IC25	0.0615457	8.51964e-24
IC23-IC25	-0.0872795	3.07012e-46
IC24-IC25	0.00675835	0.269864
IC1-IC26	0.0625468	1.59129e-24
IC2-IC26	-0.0868246	8.93818e-46
IC3-IC26	0.0141133	0.0212092
IC4-IC26	-0.0436351	1.02418e-12
IC5-IC26	0.0608988	2.4839e-23
IC6-IC26	0.0618416	5.20312e-24
IC7-IC26	0.0191362	0.00178146
IC8-IC26	-0.000788593	0.897559
IC9-IC26	0.0593032	3.3153e-22
IC10-IC26	0.106617	3.10019e-68
IC11-IC26	0.120877	2.59457e-87
IC12-IC26	0.0939059	2.81317e-53
IC13-IC26	0.0686577	3.17162e-29
IC14-IC26	0.0260677	2.07645e-05
IC15-IC26	-0.0406106	3.29425e-11
IC16-IC26	-0.0243877	6.83077e-05
IC17-IC26	0.0380532	5.13953e-10
IC18-IC26	-0.15617	3.83692e-145
IC19-IC26	-0.0777067	5.50935e-37
IC20-IC26	-0.0699051	3.07866e-30
IC21-IC26	0.0506248	1.33673e-16
IC22-IC26	0.00488386	0.425254
IC23-IC26	0.00575815	0.347178
IC24-IC26	-0.0541072	9.5756e-19
IC25-IC26	-0.0346715	1.49494e-08
IC1-IC27	0.06365	2.42827e-25
IC2-IC27	0.092378	1.31225e-51
IC3-IC27	0.066746	1.04347e-27
IC4-IC27	0.00465982	0.446799
IC5-IC27	-0.0622324	2.7032e-24
IC6-IC27	0.0419633	7.18567e-12
IC7-IC27	-0.0576529	4.50256e-21
IC8-IC27	-0.0293051	1.70695e-06
IC9-IC27	-0.0422648	5.08448e-12
IC10-IC27	0.0522208	1.44663e-17
IC11-IC27	-0.0873061	2.88362e-46
IC12-IC27	0.0483793	2.72313e-15
IC13-IC27	-0.0782646	1.70327e-37
IC14-IC27	0.0467416	2.2555e-14
IC15-IC27	0.0172723	0.00480127
IC16-IC27	-0.0140749	0.0215634
IC17-IC27	0.035675	5.67296e-09
IC18-IC27	0.0249	4.78712e-05
IC19-IC27	0.0371925	1.2467e-09
IC20-IC27	-0.146245	2.46453e-127
IC21-IC27	-0.114328	3.01174e-78
IC22-IC27	0.0506891	1.22375e-16
IC23-IC27	0.0158511	0.00965356
IC24-IC27	-0.0198788	0.00117159
IC25-IC27	-0.0224976	0.000239339
IC26-IC27	0.0273733	7.83041e-06
IC1-IC28	-0.0226453	0.000217719
IC2-IC28	-0.0264555	1.5613e-05
IC3-IC28	0.0327451	8.92411e-08
IC4-IC28	0.062976	7.68703e-25
IC5-IC28	0.037941	5.77522e-10
IC6-IC28	0.0328788	7.90787e-08
IC7-IC28	0.0472723	1.14566e-14
IC8-IC28	-0.0833643	2.52432e-42
IC9-IC28	-0.00231845	0.705053
IC10-IC28	0.0329369	7.5027e-08
IC11-IC28	0.0341977	2.34087e-08
IC12-IC28	0.0471554	1.33095e-14
IC13-IC28	-0.025193	3.89461e-05
IC14-IC28	-0.010354	0.0909463
IC15-IC28	-0.0831694	3.9113e-42
IC16-IC28	0.00783	0.20113
IC17-IC28	-0.0366014	2.26581e-09
IC18-IC28	-0.0388954	2.11941e-10
IC19-IC28	-0.0930122	2.68284e-52
IC20-IC28	0.0924425	1.11697e-51
IC21-IC28	-0.0569978	1.24304e-20
IC22-IC28	0.068887	2.07236e-29
IC23-IC28	-0.133353	5.14004e-106
IC24-IC28	0.0770312	2.25681e-36
IC25-IC28	0.0613129	1.25371e-23
IC26-IC28	0.0337086	3.69605e-08
IC27-IC28	-0.00793923	0.194917
IC1-IC29	-0.0165567	0.00686736
IC2-IC29	0.0093882	0.125339
IC3-IC29	-0.0261532	1.95055e-05
IC4-IC29	-0.0256471	2.81664e-05
IC5-IC29	0.0268932	1.12647e-05
IC6-IC29	-0.00602097	0.325614
IC7-IC29	0.125656	2.97143e-94
IC8-IC29	-0.00264876	0.665425
IC9-IC29	-0.0954154	5.9321e-55
IC10-IC29	0.0830916	4.65692e-42
IC11-IC29	0.113611	2.75208e-77
IC12-IC29	0.0188325	0.00210612
IC13-IC29	0.0371188	1.34376e-09
IC14-IC29	-0.0250802	4.21773e-05
IC15-IC29	-0.0245343	6.17436e-05
IC16-IC29	-0.0222452	0.000281035
IC17-IC29	-0.0318105	2.05096e-07
IC18-IC29	-0.0440573	6.1897e-13
IC19-IC29	-0.0306599	5.53751e-07
IC20-IC29	-0.0139296	0.0229511
IC21-IC29	-0.0232241	0.000149406
IC22-IC29	-0.0181017	0.00312149
IC23-IC29	-0.0491267	1.01345e-15
IC24-IC29	0.00982005	0.108879
IC25-IC29	-0.0246946	5.52499e-05
IC26-IC29	-0.0338768	3.16094e-08
IC27-IC29	0.00552169	0.367337
IC28-IC29	-0.13717	4.08695e-112
IC1-IC30	-0.00961178	0.116591
IC2-IC30	-0.0683322	5.78945e-29
IC3-IC30	0.0082587	0.177552
IC4-IC30	0.0460855	5.15731e-14
IC5-IC30	-0.0446086	3.18385e-13
IC6-IC30	0.03357	4.2019e-08
IC7-IC30	-0.139689	3.07853e-116
IC8-IC30	0.00294911	0.630182
IC9-IC30	0.0604649	5.05864e-23
IC10-IC30	-0.115752	3.55782e-80
IC11-IC30	-0.12318	1.27027e-90
IC12-IC30	-0.0350609	1.02965e-08
IC13-IC30	-0.00976866	0.110744
IC14-IC30	0.0231966	0.00015213
IC15-IC30	-0.0607444	3.20128e-23
IC16-IC30	-0.00094136	0.877858
IC17-IC30	0.0215977	0.000421205
IC18-IC30	0.108115	4.00537e-70
IC19-IC30	-0.0828767	7.53542e-42
IC20-IC30	0.0970041	9.55514e-57
IC21-IC30	-0.0144997	0.0179166
IC22-IC30	-0.0486782	1.8371e-15
IC23-IC30	-0.027085	9.74813e-06
IC24-IC30	0.0737034	1.95993e-33
IC25-IC30	0.0873498	2.60161e-46
IC26-IC30	0.0617364	6.20219e-24
IC27-IC30	0.0258525	2.42834e-05
IC28-IC30	0.107572	1.95019e-69
IC29-IC30	0.00292063	0.63349
IC1-IC31	-0.00948037	0.121673
IC2-IC31	-0.0434382	1.29327e-12
IC3-IC31	-0.0546047	4.60611e-19
IC4-IC31	0.0382792	4.05967e-10
IC5-IC31	0.00956313	0.118452
IC6-IC31	0.0777586	4.94133e-37
IC7-IC31	0.0214378	0.000464694
IC8-IC31	-0.054637	4.39078e-19
IC9-IC31	-0.0345363	1.70002e-08
IC10-IC31	0.0943708	8.6279e-54
IC11-IC31	0.0403278	4.50147e-11
IC12-IC31	-0.0493514	7.50763e-16
IC13-IC31	-0.00231668	0.705268
IC14-IC31	-0.0689556	1.82395e-29
IC15-IC31	-0.14641	1.27584e-127
IC16-IC31	-0.0430232	2.10763e-12
IC17-IC31	0.0062322	0.308929
IC18-IC31	-0.0982479	3.59472e-58
IC19-IC31	-0.161636	1.79939e-155
IC20-IC31	0.0144005	0.0187162
IC21-IC31	-0.00186298	0.761015
IC22-IC31	0.0427608	2.86305e-12
IC23-IC31	-0.156709	3.82703e-146
IC24-IC31	0.0597632	1.58159e-22
IC25-IC31	0.123334	7.58158e-91
IC26-IC31	0.000807514	0.895116
IC27-IC31	-0.0226824	0.000212575
IC28-IC31	0.0341472	2.45461e-08
IC29-IC31	-0.0922489	1.81024e-51
IC30-IC31	0.0814373	1.83158e-40
IC1-IC32	0.0450027	1.96995e-13
IC2-IC32	-0.104941	3.75151e-66
IC3-IC32	0.038411	3.53571e-10
IC4-IC32	0.056511	2.62384e-20
IC5-IC32	-0.0167088	0.00637082
IC6-IC32	0.0649808	2.4077e-26
IC7-IC32	-0.0658439	5.24286e-27
IC8-IC32	0.014012	0.0221554
IC9-IC32	0.112408	1.09087e-75
IC10-IC32	-0.0532873	3.15298e-18
IC11-IC32	-0.0926369	6.8732e-52
IC12-IC32	-0.0532819	3.17775e-18
IC13-IC32	0.047353	1.03287e-14
IC14-IC32	0.0713981	1.78732e-31
IC15-IC32	-0.0630473	6.80946e-25
IC16-IC32	0.0138427	0.0238175
IC17-IC32	0.0595506	2.22815e-22
IC18-IC32	0.0733129	4.25191e-33
IC19-IC32	-0.0684118	4.9983e-29
IC20-IC32	0.0755341	4.91558e-35
IC21-IC32	0.0461962	4.4894e-14
IC22-IC32	-0.0483051	3.00156e-15
IC23-IC32	-0.0954608	5.27739e-55
IC24-IC32	0.0424499	4.10697e-12
IC25-IC32	0.074769	2.319e-34
IC26-IC32	0.0012653	0.836344
IC27-IC32	-0.0898875	6.01287e-49
IC28-IC32	0.108999	2.98265e-71
IC29-IC32	-0.0146279	0.0169282
IC30-IC32	0.0648269	3.15294e-26
IC31-IC32	0.0648355	3.10595e-26
IC1-IC33	0.0146166	0.0170132
IC2-IC33	-0.00780446	0.202604
IC3-IC33	0.0681568	7.99728e-29
IC4-IC33	0.0056545	0.355926
IC5-IC33	-0.0119476	0.0511016
IC6-IC33	-0.0194597	0.00148667
IC7-IC33	-0.00141146	0.817755
IC8-IC33	0.0357917	5.06013e-09
IC9-IC33	-0.0932147	1.61243e-52
IC10-IC33	-0.0494179	6.86772e-16
IC11-IC33	0.00943218	0.123579
IC12-IC33	0.114064	6.80859e-78
IC13-IC33	-0.0278781	5.30779e-06
IC14-IC33	0.0698562	3.37643e-30
IC15-IC33	0.1355	2.00401e-109
IC16-IC33	0.0230433	0.000168206
IC17-IC33	-0.0427177	3.01051e-12
IC18-IC33	-0.0333444	5.17231e-08
IC19-IC33	0.0025497	0.677219
IC20-IC33	-0.0302469	7.84434e-07
IC21-IC33	-0.0978775	9.5901e-58
IC22-IC33	0.0793318	1.76204e-38
IC23-IC33	0.0359663	4.26112e-09
IC24-IC33	0.0410464	2.02757e-11
IC25-IC33	0.00279388	0.648299
IC26-IC33	0.0184087	0.0026502
IC27-IC33	0.0288411	2.48264e-06
IC28-IC33	-0.034125	2.50629e-08
IC29-IC33	-0.000853877	0.889132
IC30-IC33	-0.0193275	0.0016012
IC31-IC33	0.0384267	3.4781e-10
IC32-IC33	-0.0340868	2.59767e-08
IC1-IC34	0.0255459	3.02896e-05
IC2-IC34	-0.0359312	4.41123e-09
IC3-IC34	0.0286999	2.77937e-06
IC4-IC34	-0.0539747	1.16221e-18
IC5-IC34	0.106138	1.22938e-67
IC6-IC34	0.0264535	1.56361e-05
IC7-IC34	0.0683908	5.1964e-29
IC8-IC34	0.0263688	1.66461e-05
IC9-IC34	0.0103665	0.090557
IC10-IC34	0.151176	4.98932e-136
IC11-IC34	0.0232861	0.00014343
IC12-IC34	-0.0189769	0.00194555
IC13-IC34	0.0654323	1.08738e-26
IC14-IC34	0.0506621	1.27007e-16
IC15-IC34	-0.0100966	0.0992703
IC16-IC34	0.00802384	0.190201
IC17-IC34	0.115999	1.63809e-80
IC18-IC34	0.0257817	2.55601e-05
IC19-IC34	0.0963835	4.83358e-56
IC20-IC34	-0.0870486	5.28521e-46
IC21-IC34	0.000273159	0.96443
IC22-IC34	-0.130624	9.19177e-102
IC23-IC34	0.0891316	3.73472e-48
IC24-IC34	-0.0260669	2.0777e-05
IC25-IC34	-0.107394	3.27296e-69
IC26-IC34	-0.0910702	3.34585e-50
IC27-IC34	-0.062159	3.05767e-24
IC28-IC34	-0.0186615	0.00231202
IC29-IC34	-0.0357352	5.34816e-09
IC30-IC34	-0.0287993	2.56727e-06
IC31-IC34	-0.0344419	1.85913e-08
IC32-IC34	-0.0507201	1.1727e-16
IC33-IC34	-0.125651	3.02054e-94
IC1-IC35	-0.0290451	2.10712e-06
IC2-IC35	0.00695555	0.256137
IC3-IC35	-0.0440692	6.10148e-13
IC4-IC35	-0.0221786	0.000293125
IC5-IC35	0.00860798	0.159915
IC6-IC35	0.00109912	0.857592
IC7-IC35	-0.0535523	2.14921e-18
IC8-IC35	-0.0431881	1.7368e-12
IC9-IC35	0.0382563	4.15798e-10
IC10-IC35	0.0516612	3.17906e-17
IC11-IC35	0.0482746	3.12364e-15
IC12-IC35	0.0668473	8.69245e-28
IC13-IC35	-0.0053101	0.385981
IC14-IC35	-0.0584336	1.3226e-21
IC15-IC35	-0.00495507	0.418535
IC16-IC35	-0.0524616	1.02827e-17
IC17-IC35	0.0362242	3.30125e-09
IC18-IC35	-0.0796792	8.36345e-39
IC19-IC35	0.0558769	6.87866e-20
IC20-IC35	-0.0217164	0.00039141
IC21-IC35	-0.011149	0.0687243
IC22-IC35	-0.0131737	0.0314905
IC23-IC35	0.0479973	4.48706e-15
IC24-IC35	0.0525905	8.56037e-18
IC25-IC35	-0.00349692	0.568064
IC26-IC35	-0.0124805	0.0415862
IC27-IC35	0.0555908	1.05899e-19
IC28-IC35	-0.00262197	0.668607
IC29-IC35	0.0283733	3.60192e-06
IC30-IC35	-0.0135656	0.0267731
IC31-IC35	0.0330857	6.55312e-08
IC32-IC35	-0.0620969	3.39342e-24
IC33-IC35	0.0567188	1.90882e-20
IC34-IC35	-0.0812999	2.47619e-40
IC1-IC36	-0.0436078	1.05789e-12
IC2-IC36	0.0915487	1.02857e-50
IC3-IC36	-0.00860705	0.15996
IC4-IC36	-0.0105836	0.0840022
IC5-IC36	0.0428212	2.66861e-12
IC6-IC36	-0.0817527	9.14682e-41
IC7-IC36	0.00625852	0.30689
IC8-IC36	0.0335378	4.32859e-08
IC9-IC36	-0.0399776	6.60721e-11
IC10-IC36	-0.183694	5.62873e-201
IC11-IC36	-0.0295646	1.38091e-06
IC12-IC36	-0.0138185	0.0240646
IC13-IC36	-0.00783925	0.200599
IC14-IC36	-0.0213726	0.000483613
IC15-IC36	0.0740931	9.01189e-34
IC16-IC36	0.00721394	0.238894
IC17-IC36	-0.027933	5.08622e-06
IC18-IC36	0.0969495	1.10257e-56
IC19-IC36	0.137011	7.38944e-112
IC20-IC36	-0.0444306	3.94968e-13
IC21-IC36	0.00375135	0.540244
IC22-IC36	-0.0194427	0.00150097
IC23-IC36	0.0739732	1.14507e-33
IC24-IC36	0.0417507	9.15768e-12
IC25-IC36	-0.0203055	0.000915111
IC26-IC36	0.0329516	7.40319e-08
IC27-IC36	-0.0426255	3.35094e-12
IC28-IC36	-0.0410308	2.06325e-11
IC29-IC36	0.0580177	2.5453e-21
IC30-IC36	-0.118639	3.7158e-84
IC31-IC36	0.0306004	5.824e-07
IC32-IC36	-0.0807608	8.04805e-40
IC33-IC36	-0.0762167	1.21536e-35
IC34-IC36	0.0736253	2.28914e-33
IC35-IC36	0.0541434	9.0802e-19
IC1-IC37	-0.0420863	6.24177e-12
IC2-IC37	0.0300934	8.91757e-07
IC3-IC37	-0.0128539	0.0358514
IC4-IC37	-0.0229835	0.0001749
IC5-IC37	-0.00404528	0.508977
IC6-IC37	-0.0156426	0.0106508
IC7-IC37	-0.00934043	0.127273
IC8-IC37	-0.0362459	3.23088e-09
IC9-IC37	-0.0320151	1.71269e-07
IC10-IC37	0.100844	3.33476e-61
IC11-IC37	0.101575	4.50901e-62
IC12-IC37	0.0196593	0.00132795
IC13-IC37	-0.0345541	1.67164e-08
IC14-IC37	-0.0216399	0.000410381
IC15-IC37	-0.138082	1.34053e-113
IC16-IC37	-0.0215991	0.000420851
IC17-IC37	0.0637215	2.14729e-25
IC18-IC37	-0.0761898	1.28461e-35
IC19-IC37	-0.0711184	3.06008e-31
IC20-IC37	-0.0417771	8.8865e-12
IC21-IC37	-0.0377347	7.15075e-10
IC22-IC37	-0.0280352	4.69676e-06
IC23-IC37	0.078397	1.2876e-37
IC24-IC37	-0.0491487	9.84159e-16
IC25-IC37	-0.032117	1.56499e-07
IC26-IC37	-0.0517999	2.61762e-17
IC27-IC37	0.12701	2.85775e-96
IC28-IC37	-0.0440486	6.25455e-13
IC29-IC37	0.00084689	0.890033
IC30-IC37	0.00747656	0.222225
IC31-IC37	-0.0517841	2.67615e-17
IC32-IC37	-0.0206121	0.000764145
IC33-IC37	0.0911629	2.66334e-50
IC34-IC37	0.0273695	7.85319e-06
IC35-IC37	-0.00289021	0.637031
IC36-IC37	0.00380727	0.534222
IC1-IC38	-0.0396896	9.03746e-11
IC2-IC38	0.111116	5.43921e-74
IC3-IC38	-0.00273586	0.655125
IC4-IC38	0.0202904	0.000923258
IC5-IC38	-0.131387	6.08499e-103
IC6-IC38	-0.0401944	5.21208e-11
IC7-IC38	-0.128431	2.06916e-98
IC8-IC38	-0.0113949	0.0628313
IC9-IC38	-0.109553	5.79051e-72
IC10-IC38	-0.0420962	6.17127e-12
IC11-IC38	-0.0801916	2.76979e-39
IC12-IC38	0.0372484	1.1777e-09
IC13-IC38	-0.102008	1.37228e-62
IC14-IC38	-0.0338274	3.30972e-08
IC15-IC38	0.00131933	0.829461
IC16-IC38	-0.0251553	4.00003e-05
IC17-IC38	-0.0385956	2.91127e-10
IC18-IC38	0.0580696	2.34643e-21
IC19-IC38	-0.0180857	0.00314817
IC20-IC38	-0.0910748	3.30779e-50
IC21-IC38	-0.0757881	2.92721e-35
IC22-IC38	0.0350505	1.04006e-08
IC23-IC38	0.065522	9.27927e-27
IC24-IC38	0.0084975	0.165345
IC25-IC38	0.0506448	1.30044e-16
IC26-IC38	0.117818	5.16174e-83
IC27-IC38	0.0759106	2.27811e-35
IC28-IC38	0.0147278	0.0161914
IC29-IC38	0.0496313	5.1567e-16
IC30-IC38	-0.0789144	4.29511e-38
IC31-IC38	-0.00727195	0.235138
IC32-IC38	-0.105607	5.63423e-67
IC33-IC38	0.11259	6.2699e-76
IC34-IC38	0.0389372	2.02722e-10
IC35-IC38	0.0392416	1.46469e-10
IC36-IC38	-0.0832614	3.18096e-42
IC37-IC38	0.106177	1.10133e-67
IC1-IC39	0.0279844	4.88663e-06
IC2-IC39	0.00360905	0.555719
IC3-IC39	0.0197317	0.00127439
IC4-IC39	-0.0322574	1.38158e-07
IC5-IC39	0.0942768	1.09616e-53
IC6-IC39	0.0310487	3.97397e-07
IC7-IC39	-0.0121841	0.0466744
IC8-IC39	-0.0245739	6.00735e-05
IC9-IC39	0.0311662	3.59209e-07
IC10-IC39	-0.0178625	0.00354048
IC11-IC39	-0.00406189	0.50724
IC12-IC39	-0.00631684	0.302405
IC13-IC39	0.0702954	1.47121e-30
IC14-IC39	0.0123663	0.0434886
IC15-IC39	-0.0518615	2.40048e-17
IC16-IC39	-0.0251977	3.88188e-05
IC17-IC39	0.0812891	2.53575e-40
IC18-IC39	0.0371485	1.30381e-09
IC19-IC39	0.0231097	0.000161053
IC20-IC39	-0.063589	2.6966e-25
IC21-IC39	0.0526977	7.34758e-18
IC22-IC39	-0.0296013	1.33997e-06
IC23-IC39	0.0376667	7.67002e-10
IC24-IC39	0.0151712	0.0132499
IC25-IC39	-0.0239493	9.21082e-05
IC26-IC39	-0.00255793	0.676236
IC27-IC39	-0.0441998	5.2164e-13
IC28-IC39	0.030553	6.06234e-07
IC29-IC39	0.00849618	0.16541
IC30-IC39	-0.0109112	0.0748477
IC31-IC39	0.0657195	6.53975e-27
IC32-IC39	0.00556075	0.363957
IC33-IC39	-0.0941322	1.58335e-53
IC34-IC39	0.00819115	0.181124
IC35-IC39	0.0130093	0.033672
IC36-IC39	-0.0397752	8.23604e-11
IC37-IC39	0.00439234	0.473317
IC38-IC39	-0.00105003	0.863889
IC1-IC40	-0.0322483	1.39285e-07
IC2-IC40	-0.00618933	0.312268
IC3-IC40	0.00240225	0.694918
IC4-IC40	-0.0115148	0.0601146
IC5-IC40	0.0393813	1.26061e-10
IC6-IC40	-0.00570379	0.351749
IC7-IC40	-0.0728437	1.07254e-32
IC8-IC40	-0.023427	0.000130673
IC9-IC40	-0.0268856	1.13295e-05
IC10-IC40	-0.00743529	0.224788
IC11-IC40	0.0485544	2.16314e-15
IC12-IC40	0.0492767	8.29603e-16
IC13-IC40	0.0020503	0.737829
IC14-IC40	-0.052722	7.09648e-18
IC15-IC40	-0.167088	3.79434e-166
IC16-IC40	-0.0486532	1.89874e-15
IC17-IC40	0.0571758	9.44354e-21
IC18-IC40	0.0305458	6.09934e-07
IC19-IC40	-0.163754	1.4216e-159
IC20-IC40	-0.0312603	3.31205e-07
IC21-IC40	0.0376651	7.6826e-10
IC22-IC40	0.0157569	0.0100935
IC23-IC40	-0.0240561	8.56773e-05
IC24-IC40	0.0127141	0.0379153
IC25-IC40	0.118708	2.97241e-84
IC26-IC40	0.0580478	2.42784e-21
IC27-IC40	-0.0195374	0.00142293
IC28-IC40	-0.0251923	3.8966e-05
IC29-IC40	0.0522229	1.4424e-17
IC30-IC40	0.0154155	0.0118402
IC31-IC40	0.0938701	3.07978e-53
IC32-IC40	-0.000885165	0.885097
IC33-IC40	0.0144594	0.018238
IC34-IC40	0.0283444	3.68475e-06
IC35-IC40	0.0013947	0.819881
IC36-IC40	-0.151296	3.04022e-136
IC37-IC40	-0.0139848	0.0224152
IC38-IC40	-0.0395012	1.10791e-10
IC39-IC40	-0.0934871	8.11598e-53
IC1-IC41	0.0684918	4.31158e-29
IC2-IC41	-0.121567	2.6888e-88
IC3-IC41	0.0585771	1.05417e-21
IC4-IC41	0.0665315	1.53479e-27
IC5-IC41	0.0778004	4.52615e-37
IC6-IC41	0.028743	2.68529e-06
IC7-IC41	-0.0297922	1.14498e-06
IC8-IC41	-0.0364267	2.69861e-09
IC9-IC41	0.0436233	1.03863e-12
IC10-IC41	0.0348817	1.22305e-08
IC11-IC41	-0.0345141	1.73623e-08
IC12-IC41	-0.0206616	0.000742029
IC13-IC41	0.0411728	1.75984e-11
IC14-IC41	0.0361903	3.41434e-09
IC15-IC41	-0.0449223	2.17334e-13
IC16-IC41	-0.0596941	1.76811e-22
IC17-IC41	0.0867189	1.14482e-45
IC18-IC41	0.0485051	2.30819e-15
IC19-IC41	-0.0289181	2.33395e-06
IC20-IC41	0.0441628	5.4533e-13
IC21-IC41	-0.0386508	2.74649e-10
IC22-IC41	-0.153085	1.77876e-139
IC23-IC41	0.00511545	0.403634
IC24-IC41	0.0545923	4.69113e-19
IC25-IC41	-0.0279456	5.03632e-06
IC26-IC41	-0.040699	2.98646e-11
IC27-IC41	0.0329642	7.31852e-08
IC28-IC41	0.0363536	2.90267e-09
IC29-IC41	-0.046799	2.09686e-14
IC30-IC41	-0.00697392	0.254883
IC31-IC41	0.0893797	2.05397e-48
IC32-IC41	0.0336477	3.9107e-08
IC33-IC41	-0.143876	2.90066e-123
IC34-IC41	-0.0177741	0.00370776
IC35-IC41	-0.0760291	1.78681e-35
IC36-IC41	-0.045728	8.05478e-14
IC37-IC41	0.00382858	0.531937
IC38-IC41	-0.011191	0.067687
IC39-IC41	0.01735	0.0046148
IC40-IC41	0.102228	7.46975e-63
IC1-IC42	0.0389674	1.96311e-10
IC2-IC42	-0.0390676	1.76424e-10
IC3-IC42	-0.00241713	0.693124
IC4-IC42	-0.0269802	1.05508e-05
IC5-IC42	0.0497217	4.56517e-16
IC6-IC42	-0.0159201	0.0093423
IC7-IC42	-0.0192578	0.00166481
IC8-IC42	0.00860071	0.160268
IC9-IC42	0.0842947	3.07692e-43
IC10-IC42	0.101822	2.29088e-62
IC11-IC42	0.0320677	1.63482e-07
IC12-IC42	-0.00775674	0.205379
IC13-IC42	0.0453931	1.21942e-13
IC14-IC42	0.0167415	0.00626842
IC15-IC42	-0.0177305	0.00379282
IC16-IC42	-0.0642441	8.70543e-26
IC17-IC42	0.0659027	4.72279e-27
IC18-IC42	0.0205515	0.000791996
IC19-IC42	0.0634731	3.29001e-25
IC20-IC42	0.00125135	0.838123
IC21-IC42	0.0639768	1.38257e-25
IC22-IC42	-0.0817804	8.60364e-41
IC23-IC42	0.0955963	3.72024e-55
IC24-IC42	-0.0615643	8.26085e-24
IC25-IC42	-0.0973602	3.75232e-57
IC26-IC42	-0.0560828	5.03671e-20
IC27-IC42	0.00541501	0.376667
IC28-IC42	0.0263047	1.74517e-05
IC29-IC42	0.0436216	1.04078e-12
IC30-IC42	-0.0251542	4.00316e-05
IC31-IC42	0.023389	0.000133999
IC32-IC42	0.0070625	0.248898
IC33-IC42	-0.0343162	2.09362e-08
IC34-IC42	0.0602289	7.43372e-23
IC35-IC42	-0.0950657	1.45865e-54
IC36-IC42	0.0366342	2.19228e-09
IC37-IC42	-0.0153663	0.0121132
IC38-IC42	0.0150745	0.0138479
IC39-IC42	0.0452189	1.51121e-13
IC40-IC42	0.0243034	7.23762e-05
IC41-IC42	0.00964807	0.115217
IC1-IC43	-0.0236479	0.000112797
IC2-IC43	0.0559199	6.44656e-20
IC3-IC43	0.0466977	2.38471e-14
IC4-IC43	0.0456994	8.34663e-14
IC5-IC43	-0.0900192	4.36671e-49
IC6-IC43	0.0155397	0.0111759
IC7-IC43	-0.141987	4.56479e-120
IC8-IC43	0.00754589	0.217967
IC9-IC43	-0.00474909	0.438141
IC10-IC43	-0.121517	3.17044e-88
IC11-IC43	-0.161565	2.46401e-155
IC12-IC43	-0.0370683	1.41462e-09
IC13-IC43	-0.0641399	1.04272e-25
IC14-IC43	0.0271713	9.13142e-06
IC15-IC43	0.0775526	7.60864e-37
IC16-IC43	0.0305378	6.14088e-07
IC17-IC43	-0.0808223	7.03797e-40
IC18-IC43	0.132848	3.20303e-105
IC19-IC43	0.0106998	0.080658
IC20-IC43	0.0451497	1.64519e-13
IC21-IC43	-0.0598166	1.45084e-22
IC22-IC43	0.0190314	0.00188788
IC23-IC43	0.0876999	1.13764e-46
IC24-IC43	0.0130345	0.0333294
IC25-IC43	0.0333261	5.25991e-08
IC26-IC43	0.0612371	1.42143e-23
IC27-IC43	0.0757267	3.31811e-35
IC28-IC43	0.0580254	2.5147e-21
IC29-IC43	0.0576744	4.35412e-21
IC30-IC43	-0.0198907	0.00116361
IC31-IC43	0.0591866	3.9958e-22
IC32-IC43	0.0216006	0.000420445
IC33-IC43	-0.0345788	1.63288e-08
IC34-IC43	0.0775312	7.95571e-37
IC35-IC43	0.076274	1.08033e-35
IC36-IC43	-0.119792	8.95341e-86
IC37-IC43	0.0766875	4.60271e-36
IC38-IC43	-0.0640554	1.20696e-25
IC39-IC43	-0.0172755	0.00479346
IC40-IC43	-0.00980123	0.109559
IC41-IC43	-0.00645712	0.291794
IC42-IC43	-0.00253135	0.679411
IC1-IC44	-0.0424408	4.15054e-12
IC2-IC44	-0.102825	1.42825e-63
IC3-IC44	-0.0322371	1.40669e-07
IC4-IC44	-0.00767658	0.2101
IC5-IC44	0.0270466	1.00352e-05
IC6-IC44	0.0354861	6.82194e-09
IC7-IC44	-0.0152024	0.0130621
IC8-IC44	-0.0297372	1.19818e-06
IC9-IC44	-0.022665	0.000214966
IC10-IC44	0.104932	3.84795e-66
IC11-IC44	0.0374865	9.23181e-10
IC12-IC44	0.0201401	0.00100765
IC13-IC44	0.00252733	0.679892
IC14-IC44	-0.0191367	0.0017809
IC15-IC44	-0.0897321	8.76369e-49
IC16-IC44	0.0135384	0.0270803
IC17-IC44	0.00538194	0.379587
IC18-IC44	-0.0693481	8.7688e-30
IC19-IC44	-0.102581	2.81528e-63
IC20-IC44	0.0739446	1.21238e-33
IC21-IC44	-0.0318513	1.97862e-07
IC22-IC44	0.0531774	3.69421e-18
IC23-IC44	-0.0745355	3.71153e-34
IC24-IC44	0.0393972	1.23924e-10
IC25-IC44	0.0601761	8.10063e-23
IC26-IC44	-0.0133095	0.0297804
IC27-IC44	0.0229826	0.000175003
IC28-IC44	-0.0036343	0.552958
IC29-IC44	-0.0503421	1.96797e-16
IC30-IC44	0.0812068	3.03693e-40
IC31-IC44	0.0623966	2.05047e-24
IC32-IC44	0.0919273	4.02698e-51
IC33-IC44	0.0227497	0.000203547
IC34-IC44	-0.0646811	4.0682e-26
IC35-IC44	-0.0240632	8.52655e-05
IC36-IC44	0.0154678	0.0115564
IC37-IC44	-0.0285715	3.07852e-06
IC38-IC44	0.0649747	2.43355e-26
IC39-IC44	0.0504473	1.70452e-16
IC40-IC44	0.110717	1.80329e-73
IC41-IC44	-0.0345945	1.60859e-08
IC42-IC44	-0.0386583	2.72476e-10
IC43-IC44	0.0642028	9.35117e-26
IC1-IC45	-0.0048865	0.425004
IC2-IC45	0.0692975	9.63798e-30
IC3-IC45	0.00396215	0.517724
IC4-IC45	0.0242897	7.30585e-05
IC5-IC45	-0.0134896	0.0276373
IC6-IC45	-0.0872688	3.14828e-46
IC7-IC45	0.0294809	1.47888e-06
IC8-IC45	-0.0068711	0.261955
IC9-IC45	0.0319557	1.80485e-07
IC10-IC45	-0.0869296	6.98893e-46
IC11-IC45	0.0186662	0.00230606
IC12-IC45	-0.0526015	8.4268e-18
IC13-IC45	0.0286649	2.85813e-06
IC14-IC45	-0.0364794	2.56002e-09
IC15-IC45	0.00380899	0.534037
IC16-IC45	-0.0588426	6.91652e-22
IC17-IC45	0.0224373	0.000248735
IC18-IC45	0.0446961	2.86292e-13
IC19-IC45	0.0558679	6.97332e-20
IC20-IC45	-0.026925	1.09989e-05
IC21-IC45	0.0653038	1.3642e-26
IC22-IC45	-0.0375988	8.22513e-10
IC23-IC45	0.053341	2.91782e-18
IC24-IC45	-0.0549005	2.97126e-19
IC25-IC45	-0.0130215	0.0335061
IC26-IC45	-0.0190146	0.0019055
IC27-IC45	0.00293898	0.631358
IC28-IC45	0.00218516	0.721281
IC29-IC45	0.0953133	7.71671e-55
IC30-IC45	-0.0773536	1.15302e-36
IC31-IC45	-0.0510345	7.60205e-17
IC32-IC45	-0.0685905	3.59192e-29
IC33-IC45	0.0750349	1.35508e-34
IC34-IC45	0.0652304	1.55238e-26
IC35-IC45	-0.0103767	0.0902406
IC36-IC45	-0.0586227	9.80566e-22
IC37-IC45	-0.00619843	0.311558
IC38-IC45	-0.0450581	1.84072e-13
IC39-IC45	-0.056126	4.71656e-20
IC40-IC45	-0.14378	4.22953e-123
IC41-IC45	0.0372235	1.20799e-09
IC42-IC45	0.0336673	3.84014e-08
IC43-IC45	-0.0520391	1.86989e-17
IC44-IC45	-0.0205142	0.00080962
IC1-IC46	0.0173291	0.00466424
IC2-IC46	0.0071248	0.244748
IC3-IC46	-0.0233467	0.000137803
IC4-IC46	-0.0137039	0.0252614
IC5-IC46	-0.0862312	3.57379e-45
IC6-IC46	0.0261593	1.94182e-05
IC7-IC46	-0.0270222	1.02222e-05
IC8-IC46	0.0217723	0.000378066
IC9-IC46	-0.0144914	0.0179825
IC10-IC46	-0.0536602	1.8378e-18
IC11-IC46	-0.0498938	3.61857e-16
IC12-IC46	-0.0697397	4.20462e-30
IC13-IC46	0.0145476	0.0175417
IC14-IC46	-0.0136341	0.0260143
IC15-IC46	0.0703505	1.32524e-30
IC16-IC46	0.00715055	0.243046
IC17-IC46	-0.0404531	3.92075e-11
IC18-IC46	-0.0684869	4.35089e-29
IC19-IC46	-0.0467379	2.26597e-14
IC20-IC46	-0.00386471	0.528072
IC21-IC46	0.0546999	4.00068e-19
IC22-IC46	0.0361231	3.64957e-09
IC23-IC46	-0.0677432	1.70739e-28
IC24-IC46	-0.0514828	4.07911e-17
IC25-IC46	0.0345711	1.64476e-08
IC26-IC46	0.00668367	0.275193
IC27-IC46	-0.00429909	0.482762
IC28-IC46	0.0870137	5.73677e-46
IC29-IC46	0.0544715	5.60657e-19
IC30-IC46	0.0195349	0.0014249
IC31-IC46	0.00534173	0.383159
IC32-IC46	-0.0150014	0.0143155
IC33-IC46	0.0951482	1.17995e-54
IC34-IC46	-0.0297135	1.22179e-06
IC35-IC46	0.0441529	5.51853e-13
IC36-IC46	0.0140876	0.0214456
IC37-IC46	0.00555468	0.364481
IC38-IC46	-0.00704793	0.249875
IC39-IC46	0.0054992	0.369291
IC40-IC46	0.102535	3.1966e-63
IC41-IC46	0.0368463	1.77097e-09
IC42-IC46	-0.0593832	2.91605e-22
IC43-IC46	-0.0636981	2.23565e-25
IC44-IC46	0.0362046	3.36623e-09
IC45-IC46	0.0182034	0.00295754
IC1-IC47	-0.0345244	1.71931e-08
IC2-IC47	-0.00163655	0.789329
IC3-IC47	-0.020836	0.000668859
IC4-IC47	0.0214385	0.000464494
IC5-IC47	0.0361465	3.56595e-09
IC6-IC47	-0.0754357	6.00687e-35
IC7-IC47	0.0560153	5.57897e-20
IC8-IC47	-0.02591	2.32916e-05
IC9-IC47	-0.0326533	9.69444e-08
IC10-IC47	-0.018207	0.00295197
IC11-IC47	0.101347	8.44519e-62
IC12-IC47	0.052932	5.25524e-18
IC13-IC47	0.0163554	0.00757732
IC14-IC47	-0.0588142	7.23596e-22
IC15-IC47	-0.0605003	4.77431e-23
IC16-IC47	-0.0544469	5.81306e-19
IC17-IC47	0.0398421	7.65784e-11
IC18-IC47	-0.0485884	2.06835e-15
IC19-IC47	0.0131045	0.0323933
IC20-IC47	-0.0226066	0.000223197
IC21-IC47	2.16629e-05	0.997178
IC22-IC47	-0.0468366	1.999e-14
IC23-IC47	0.0050571	0.409018
IC24-IC47	0.0389263	2.05084e-10
IC25-IC47	0.0250191	4.40332e-05
IC26-IC47	0.00232234	0.704582
IC27-IC47	-0.0206364	0.000753208
IC28-IC47	-0.074138	8.23807e-34
IC29-IC47	-0.0262126	1.86742e-05
IC30-IC47	-0.0624352	1.92131e-24
IC31-IC47	-0.0173968	0.00450574
IC32-IC47	-0.0554541	1.30038e-19
IC33-IC47	0.0172044	0.00496989
IC34-IC47	-0.00714827	0.243197
IC35-IC47	-0.0147065	0.0163463
IC36-IC47	0.0422808	4.9918e-12
IC37-IC47	-0.0352935	8.22526e-09
IC38-IC47	-0.023629	0.000114232
IC39-IC47	-0.0150365	0.0140894
IC40-IC47	-0.102646	2.3458e-63
IC41-IC47	-0.0137867	0.024391
IC42-IC47	0.0380219	5.30964e-10
IC43-IC47	-0.0401929	5.22076e-11
IC44-IC47	-0.0502043	2.37455e-16
IC45-IC47	0.0221216	0.00030386
IC46-IC47	0.0740612	9.60471e-34
IC1-IC48	0.0270729	9.83796e-06
IC2-IC48	-0.042768	2.83921e-12
IC3-IC48	0.00150248	0.80623
IC4-IC48	-0.0503908	1.84146e-16
IC5-IC48	0.10168	3.38329e-62
IC6-IC48	0.0929042	3.5183e-52
IC7-IC48	0.104545	1.15201e-65
IC8-IC48	-0.0285697	3.08286e-06
IC9-IC48	0.0214358	0.000465291
IC10-IC48	0.0619548	4.30597e-24
IC11-IC48	0.0601443	8.53038e-23
IC12-IC48	-0.0713044	2.14065e-31
IC13-IC48	0.0967284	1.96585e-56
IC14-IC48	0.0162309	0.00804867
IC15-IC48	-0.0269546	1.07563e-05
IC16-IC48	-0.0137902	0.0243548
IC17-IC48	0.0498203	3.99645e-16
IC18-IC48	-0.0855493	1.73587e-44
IC19-IC48	-0.0915409	1.04846e-50
IC20-IC48	0.0477444	6.23242e-15
IC21-IC48	0.0575657	5.15784e-21
IC22-IC48	0.0222723	0.000276262
IC23-IC48	-0.0796967	8.05377e-39
IC24-IC48	-0.0630945	6.2828e-25
IC25-IC48	-0.0793526	1.68511e-38
IC26-IC48	-0.134977	1.37422e-108
IC27-IC48	-0.00300644	0.623547
IC28-IC48	0.00821465	0.179876
IC29-IC48	-0.0155739	0.010999
IC30-IC48	0.109256	1.39615e-71
IC31-IC48	0.0173047	0.00472271
IC32-IC48	0.0934559	8.77998e-53
IC33-IC48	-0.0243441	7.03848e-05
IC34-IC48	-0.0643624	7.0889e-26
IC35-IC48	0.0159548	0.00918921
IC36-IC48	0.0395868	1.01011e-10
IC37-IC48	-0.0357975	5.03133e-09
IC38-IC48	0.046312	3.88114e-14
IC39-IC48	-0.0177463	0.00376178
IC40-IC48	0.100878	3.04195e-61
IC41-IC48	-0.0248411	4.98852e-05
IC42-IC48	-0.0374347	9.73543e-10
IC43-IC48	0.0229684	0.000176627
IC44-IC48	0.00512952	0.402342
IC45-IC48	0.0987955	8.36778e-59
IC46-IC48	0.00645426	0.292008
IC47-IC48	0.0219471	0.000339029
IC1-IC49	-0.0088688	0.147634
IC2-IC49	0.0199371	0.00113298
IC3-IC49	0.0222224	0.000285124
IC4-IC49	0.0365395	2.41069e-09
IC5-IC49	0.0295625	1.38332e-06
IC6-IC49	-0.036671	2.11284e-09
IC7-IC49	0.00985604	0.107589
IC8-IC49	0.0440052	6.58829e-13
IC9-IC49	-0.0810313	4.45961e-40
IC10-IC49	-0.0240865	8.39221e-05
IC11-IC49	-0.0948356	2.63147e-54
IC12-IC49	-0.0752765	8.30307e-35
IC13-IC49	-0.0142484	0.0200031
IC14-IC49	-0.000403461	0.947482
IC15-IC49	0.083408	2.28768e-42
IC16-IC49	0.0124256	0.0424925
IC17-IC49	-0.059351	3.0704e-22
IC18-IC49	0.127898	1.32153e-97
IC19-IC49	0.0454986	1.07043e-13
IC20-IC49	0.0319026	1.8914e-07
IC21-IC49	-0.0304603	6.55625e-07
IC22-IC49	-0.0250799	4.21859e-05
IC23-IC49	-0.00198274	0.746165
IC24-IC49	0.0504683	1.65639e-16
IC25-IC49	0.0176337	0.0039883
IC26-IC49	0.0180278	0.0032459
IC27-IC49	-0.0393793	1.26333e-10
IC28-IC49	-0.0161901	0.00820885
IC29-IC49	0.0309626	4.27846e-07
IC30-IC49	-0.071875	7.1092e-32
IC31-IC49	0.0549319	2.83604e-19
IC32-IC49	-0.0190148	0.00190529
IC33-IC49	-0.12105	1.47159e-87
IC34-IC49	0.0547004	3.99767e-19
IC35-IC49	0.0172489	0.00485884
IC36-IC49	-0.0640437	1.23171e-25
IC37-IC49	0.0685096	4.17188e-29
IC38-IC49	-0.0602519	7.15987e-23
IC39-IC49	0.0144895	0.0179977
IC40-IC49	0.0514358	4.35488e-17
IC41-IC49	-0.0305507	6.07422e-07
IC42-IC49	0.062287	2.4661e-24
IC43-IC49	-0.12001	4.40676e-86
IC44-IC49	0.0192618	0.0016611
IC45-IC49	0.0767834	3.77402e-36
IC46-IC49	-0.013258	0.030419
IC47-IC49	0.037597	8.24067e-10
IC48-IC49	0.0908407	5.87748e-50
IC1-IC50	0.0021808	0.721814
IC2-IC50	-0.0661435	3.07462e-27
IC3-IC50	-0.00136199	0.824036
IC4-IC50	0.0496472	5.0475e-16
IC5-IC50	-0.0765546	6.058e-36
IC6-IC50	0.0415307	1.17557e-11
IC7-IC50	-0.0921709	2.19814e-51
IC8-IC50	-0.01651	0.0070263
IC9-IC50	-0.0215378	0.00043703
IC10-IC50	0.0476686	6.87529e-15
IC11-IC50	-0.0311622	3.60438e-07
IC12-IC50	-0.00532928	0.384268
IC13-IC50	-0.0124487	0.0421096
IC14-IC50	0.0155237	0.0112595
IC15-IC50	-0.0931605	1.848e-52
IC16-IC50	0.00100855	0.869216
IC17-IC50	-0.0020304	0.740281
IC18-IC50	-0.0230955	0.000162564
IC19-IC50	-0.13137	6.46466e-103
IC20-IC50	0.0389955	1.90524e-10
IC21-IC50	-0.039707	8.86827e-11
IC22-IC50	0.0355753	6.25351e-09
IC23-IC50	-0.0796355	9.18568e-39
IC24-IC50	0.042264	5.0891e-12
IC25-IC50	0.0800108	4.09384e-39
IC26-IC50	0.0436783	9.72923e-13
IC27-IC50	0.0193304	0.00159862
IC28-IC50	0.0518423	2.46633e-17
IC29-IC50	-0.0408567	2.50622e-11
IC30-IC50	0.0670094	6.48544e-28
IC31-IC50	0.010424	0.0887805
IC32-IC50	0.0617369	6.19632e-24
IC33-IC50	0.0603099	6.51497e-23
IC34-IC50	-0.0358925	4.58276e-09
IC35-IC50	0.00492351	0.421506
IC36-IC50	-0.0450952	1.75893e-13
IC37-IC50	-0.000991182	0.871448
IC38-IC50	0.0175695	0.00412291
IC39-IC50	0.0513341	5.01733e-17
IC40-IC50	0.111057	6.49417e-74
IC41-IC50	0.0232769	0.000144305
IC42-IC50	0.00318908	0.602612
IC43-IC50	0.0482849	3.08176e-15
IC44-IC50	0.0815691	1.37055e-40
IC45-IC50	-0.0656562	7.3168e-27
IC46-IC50	-0.0048657	0.426978
IC47-IC50	-0.0676455	2.04124e-28
IC48-IC50	0.0392605	1.43521e-10
IC49-IC50	-0.0306569	5.5518e-07
IC1-IC51	0.00960884	0.116703
IC2-IC51	0.00822146	0.179515
IC3-IC51	0.0811031	3.81122e-40
IC4-IC51	-0.0374656	9.43199e-10
IC5-IC51	0.00426856	0.485875
IC6-IC51	-0.00900418	0.14155
IC7-IC51	-0.038642	2.77228e-10
IC8-IC51	0.099847	4.978e-60
IC9-IC51	0.0522608	1.36708e-17
IC10-IC51	-0.0806709	9.78876e-40
IC11-IC51	-0.0707966	5.66713e-31
IC12-IC51	-0.0124239	0.042521
IC13-IC51	0.0151747	0.0132288
IC14-IC51	0.119508	2.25004e-85
IC15-IC51	0.085967	6.60198e-45
IC16-IC51	0.102286	6.3569e-63
IC17-IC51	-0.00241621	0.693235
IC18-IC51	-0.00192655	0.75312
IC19-IC51	0.0414719	1.25642e-11
IC20-IC51	0.0114982	0.0604852
IC21-IC51	0.00720289	0.239614
IC22-IC51	0.014996	0.0143507
IC23-IC51	0.104768	6.11474e-66
IC24-IC51	-0.0548333	3.283e-19
IC25-IC51	-0.0336162	4.02605e-08
IC26-IC51	-0.073873	1.39823e-33
IC27-IC51	0.00709293	0.246864
IC28-IC51	0.0678238	1.47331e-28
IC29-IC51	0.0338037	3.38368e-08
IC30-IC51	0.00740424	0.22673
IC31-IC51	0.047421	9.46404e-15
IC32-IC51	0.0196435	0.0013399
IC33-IC51	-0.0258854	2.37112e-05
IC34-IC51	-0.0142632	0.0198744
IC35-IC51	-0.00496384	0.417713
IC36-IC51	-0.0560371	5.39788e-20
IC37-IC51	0.0247979	5.14149e-05
IC38-IC51	0.0354299	7.20523e-09
IC39-IC51	-0.0707494	6.2008e-31
IC40-IC51	-0.0269037	1.11762e-05
IC41-IC51	-0.0555144	1.18776e-19
IC42-IC51	-0.0524958	9.79527e-18
IC43-IC51	-0.0457022	8.3175e-14
IC44-IC51	0.0109581	0.0736044
IC45-IC51	0.00704568	0.250026
IC46-IC51	-0.0337321	3.61621e-08
IC47-IC51	0.0165981	0.00672871
IC48-IC51	-0.0386916	2.63072e-10
IC49-IC51	-0.0459961	5.76778e-14
IC50-IC51	0.00491384	0.422418
IC1-IC52	0.0340276	2.7458e-08
IC2-IC52	0.00969254	0.113551
IC3-IC52	0.0624362	1.91784e-24
IC4-IC52	0.00469704	0.443178
IC5-IC52	0.0168764	0.00586179
IC6-IC52	-0.0105247	0.0857424
IC7-IC52	0.000461923	0.939886
IC8-IC52	0.0514649	4.1823e-17
IC9-IC52	0.05988	1.30946e-22
IC10-IC52	-0.0165361	0.00693697
IC11-IC52	-0.00315076	0.606978
IC12-IC52	-0.0129821	0.0340449
IC13-IC52	0.00418351	0.494608
IC14-IC52	0.104461	1.45761e-65
IC15-IC52	-0.0410102	2.11137e-11
IC16-IC52	0.0630132	7.21656e-25
IC17-IC52	0.0308245	4.81425e-07
IC18-IC52	-0.0291251	1.97515e-06
IC19-IC52	0.0100447	0.10102
IC20-IC52	0.0273853	7.75896e-06
IC21-IC52	0.0210562	0.000586021
IC22-IC52	-0.0113071	0.0648863
IC23-IC52	0.0589331	5.98874e-22
IC24-IC52	-0.0536017	2.00053e-18
IC25-IC52	-0.0499923	3.1669e-16
IC26-IC52	-0.0418303	8.36426e-12
IC27-IC52	0.0398842	7.31508e-11
IC28-IC52	0.00185099	0.762506
IC29-IC52	0.00101809	0.86799
IC30-IC52	0.0558738	6.91136e-20
IC31-IC52	-0.0269312	1.09479e-05
IC32-IC52	0.0367425	1.96624e-09
IC33-IC52	0.0387576	2.45314e-10
IC34-IC52	0.0130334	0.0333444
IC35-IC52	-0.0236077	0.000115871
IC36-IC52	-0.0140814	0.0215033
IC37-IC52	-0.00812866	0.184476
IC38-IC52	0.0538456	1.40324e-18
IC39-IC52	-0.0339614	2.92109e-08
IC40-IC52	-0.0712033	2.59963e-31
IC41-IC52	0.00202512	0.740932
IC42-IC52	-0.0200124	0.00108489
IC43-IC52	0.0111115	0.069662
IC44-IC52	-0.00958596	0.117576
IC45-IC52	0.000769093	0.900079
IC46-IC52	-0.0362671	3.16344e-09
IC47-IC52	-0.00278792	0.648998
IC48-IC52	-0.0441506	5.53396e-13
IC49-IC52	0.019011	0.00190929
IC50-IC52	0.0150287	0.0141389
IC51-IC52	0.0243443	7.03734e-05
IC1-IC53	-0.0272084	8.87813e-06
IC2-IC53	0.0234208	0.000131208
IC3-IC53	-0.0458989	6.51123e-14
IC4-IC53	0.026575	1.42894e-05
IC5-IC53	0.00798148	0.192551
IC6-IC53	-0.0117305	0.0554709
IC7-IC53	0.0231523	0.000156624
IC8-IC53	0.00266059	0.664022
IC9-IC53	-0.00066879	0.913055
IC10-IC53	0.0264553	1.56156e-05
IC11-IC53	-0.00112248	0.854598
IC12-IC53	-0.0702144	1.71563e-30
IC13-IC53	-0.0164455	0.00725183
IC14-IC53	-0.0554099	1.38947e-19
IC15-IC53	0.00238241	0.697312
IC16-IC53	0.00362395	0.554089
IC17-IC53	-0.0371934	1.24565e-09
IC18-IC53	0.0228452	0.000191355
IC19-IC53	0.0578896	3.11095e-21
IC20-IC53	-0.00925961	0.130598
IC21-IC53	0.00165007	0.78763
IC22-IC53	-0.0722792	3.23896e-32
IC23-IC53	0.0150611	0.0139324
IC24-IC53	0.0165451	0.00690649
IC25-IC53	-0.0213087	0.000502844
IC26-IC53	0.000293864	0.961735
IC27-IC53	-0.00526966	0.389609
IC28-IC53	0.0162223	0.0080823
IC29-IC53	-0.0218128	0.000368653
IC30-IC53	-0.0666991	1.13531e-27
IC31-IC53	-0.0797268	7.54963e-39
IC32-IC53	-0.0345132	1.73773e-08
IC33-IC53	-0.010976	0.0731355
IC34-IC53	0.0702389	1.63765e-30
IC35-IC53	0.0199162	0.00114666
IC36-IC53	0.0791351	2.68299e-38
IC37-IC53	-0.055764	8.1578e-20
IC38-IC53	-0.0660296	3.76725e-27
IC39-IC53	0.0839573	6.61821e-43
IC40-IC53	-0.0271365	9.37564e-06
IC41-IC53	0.00317044	0.604734
IC42-IC53	0.0451896	1.56655e-13
IC43-IC53	-0.00948817	0.121366
IC44-IC53	-0.0634112	3.65757e-25
IC45-IC53	-0.00927796	0.129837
IC46-IC53	-0.0478645	5.33305e-15
IC47-IC53	-0.00912619	0.136234
IC48-IC53	0.00888062	0.147095
IC49-IC53	0.0412634	1.58949e-11
IC50-IC53	-0.0988728	6.80833e-59
IC51-IC53	0.0211257	0.000561952
IC52-IC53	0.0199015	0.00115639
IC1-IC54	-0.00716301	0.242226
IC2-IC54	-0.000339077	0.955854
IC3-IC54	-0.0173432	0.00463097
IC4-IC54	0.0296574	1.27959e-06
IC5-IC54	-0.0335206	4.3981e-08
IC6-IC54	-0.0231987	0.000151924
IC7-IC54	-0.0496517	5.01689e-16
IC8-IC54	-0.00339704	0.579169
IC9-IC54	0.00159426	0.79465
IC10-IC54	-0.0269863	1.05022e-05
IC11-IC54	-0.0590665	4.84125e-22
IC12-IC54	-0.0124529	0.0420398
IC13-IC54	-0.0230222	0.000170543
IC14-IC54	0.0179813	0.00332638
IC15-IC54	-0.0196927	0.00130296
IC16-IC54	-0.00327785	0.592553
IC17-IC54	-0.0283663	3.62175e-06
IC18-IC54	0.060307	6.54554e-23
IC19-IC54	0.000707867	0.907997
IC20-IC54	0.0471761	1.29613e-14
IC21-IC54	-0.0456522	8.85053e-14
IC22-IC54	-0.00755883	0.217179
IC23-IC54	0.0191073	0.00181024
IC24-IC54	0.0436862	9.63832e-13
IC25-IC54	0.0233488	0.000137612
IC26-IC54	0.0265911	1.41187e-05
IC27-IC54	0.0208161	0.000676853
IC28-IC54	0.00335892	0.583434
IC29-IC54	0.007225	0.238175
IC30-IC54	0.00111829	0.855135
IC31-IC54	0.00636698	0.298583
IC32-IC54	0.0129562	0.0344035
IC33-IC54	-0.0164301	0.00730656
IC34-IC54	0.0481561	3.64771e-15
IC35-IC54	-0.0164743	0.00715046
IC36-IC54	-0.0190283	0.00189108
IC37-IC54	0.0358603	4.72996e-09
IC38-IC54	-0.0224343	0.000249223
IC39-IC54	0.0508542	9.7504e-17
IC40-IC54	0.0196577	0.0013292
IC41-IC54	-0.00484852	0.428612
IC42-IC54	0.00974823	0.111492
IC43-IC54	-0.00709703	0.246591
IC44-IC54	0.00553034	0.366587
IC45-IC54	0.00913505	0.135854
IC46-IC54	-0.0188086	0.00213387
IC47-IC54	-0.0105602	0.0846896
IC48-IC54	0.0648969	2.78888e-26
IC49-IC54	-0.0213181	0.000499968
IC50-IC54	-0.00297313	0.627398
IC51-IC54	0.0226001	0.000224125
IC52-IC54	-0.00736188	0.229398
IC53-IC54	-0.0100221	0.10179
IC1-IC55	0.00519613	0.396259
IC2-IC55	0.0276605	6.28131e-06
IC3-IC55	-0.0173683	0.00457198
IC4-IC55	-0.00845589	0.167425
IC5-IC55	0.0140267	0.0220158
IC6-IC55	-0.0118075	0.0538856
IC7-IC55	0.0333223	5.27809e-08
IC8-IC55	-0.00763361	0.212664
IC9-IC55	0.0710337	3.59959e-31
IC10-IC55	-0.0328531	8.09418e-08
IC11-IC55	0.0303242	7.35166e-07
IC12-IC55	-0.0514363	4.35231e-17
IC13-IC55	0.0476871	6.71237e-15
IC14-IC55	-0.0463076	3.90271e-14
IC15-IC55	-0.0289044	2.35969e-06
IC16-IC55	-0.0526158	8.25682e-18
IC17-IC55	0.0506681	1.25957e-16
IC18-IC55	-0.0306846	5.42294e-07
IC19-IC55	0.00551236	0.368147
IC20-IC55	-0.0104074	0.0892902
IC21-IC55	0.0747556	2.38271e-34
IC22-IC55	0.0105171	0.0859673
IC23-IC55	0.00613435	0.316586
IC24-IC55	-0.055632	9.95272e-20
IC25-IC55	-0.0128365	0.0361037
IC26-IC55	-0.0577418	3.91954e-21
IC27-IC55	-0.0025978	0.671482
IC28-IC55	0.0232637	0.000145558
IC29-IC55	0.0474661	8.92982e-15
IC30-IC55	-0.038089	4.9517e-10
IC31-IC55	-0.0367358	1.9795e-09
IC32-IC55	-0.0348779	1.22745e-08
IC33-IC55	0.0643326	7.46521e-26
IC34-IC55	-0.00465894	0.446885
IC35-IC55	9.18968e-05	0.98803
IC36-IC55	0.0289345	2.30342e-06
IC37-IC55	-0.0441859	5.30408e-13
IC38-IC55	-0.065079	2.02627e-26
IC39-IC55	-0.0514495	4.27279e-17
IC40-IC55	-0.0319919	1.74815e-07
IC41-IC55	0.0381914	4.45012e-10
IC42-IC55	-0.0469726	1.68106e-14
IC43-IC55	-0.00689268	0.26046
IC44-IC55	-0.00684727	0.263613
IC45-IC55	-0.0122552	0.0454095
IC46-IC55	-0.0172559	0.00484146
IC47-IC55	0.00981009	0.109239
IC48-IC55	0.0374078	1.00072e-09
IC49-IC55	0.0766858	4.61842e-36
IC50-IC55	-0.0417139	9.54972e-12
IC51-IC55	-0.0227596	0.000202251
IC52-IC55	-0.0323902	1.22731e-07
IC53-IC55	-0.0146575	0.0167071
IC54-IC55	0.0082934	0.175738

## Sheet: Figure 5 sMRI
Regional volumes of subcortical structures derived from FreeSurfer subcortical volumetric subsegmentation.
Structure	Label	Atlas	Hemisphere	Correlation with predicted g-factor	p-value
Volume of Corticoamygdaloid-transitio (left hemisphere)	corticoamygdaloid_transitio	HippoAmyg	left	0.399043	0
Volume of CA4-head (left hemisphere)	ca4_head	HippoAmyg	left	0.372963	0
Volume of CA3-head (right hemisphere)	ca3_head	HippoAmyg	right	0.347018	0
Volume of Lateral-nucleus (left hemisphere)	lateral_nucleus	HippoAmyg	left	0.323503	0
Volume of Whole-hippocampal-head (right hemisphere)	whole_hippocampal_head	HippoAmyg	right	0.437071	0
Volume of subiculum-body (left hemisphere)	subiculum_body	HippoAmyg	left	0.303539	0
Volume of LP (right hemisphere)	right_lp	Thalamus	right	0.149348	1.81207e-135
Volume of subiculum-head (right hemisphere)	subiculum_head	HippoAmyg	right	0.323747	0
Volume of CM (left hemisphere)	left_cm	Thalamus	left	0.0990097	3.11222e-60
Volume of GC-ML-DG-head (right hemisphere)	gc_ml_dg_head	HippoAmyg	right	0.364161	0
Volume of Pf (left hemisphere)	left_pf	Thalamus	left	0.0893539	2.38717e-49
Volume of VM (right hemisphere)	right_vm	Thalamus	right	0.174522	5.26087e-185
Volume of Paralaminar-nucleus (right hemisphere)	paralaminar_nucleus	HippoAmyg	right	0.242397	0
Volume of VPL (left hemisphere)	left_vpl	Thalamus	left	0.193015	1.3183e-226
Volume of Pt (right hemisphere)	right_pt	Thalamus	right	0.024624	4.86609e-05
Volume of VPL (right hemisphere)	right_vpl	Thalamus	right	0.236452	0
Volume of MDm (right hemisphere)	right_mdm	Thalamus	right	0.3854	0
Volume of AV (right hemisphere)	right_av	Thalamus	right	0.107193	2.41919e-70
Volume of Pf (right hemisphere)	right_pf	Thalamus	right	0.112753	1.11932e-77
Volume of molecular-layer-HP-body (right hemisphere)	molecular_layer_hp_body	HippoAmyg	right	0.20648	9.80601e-260
Volume of Pc (left hemisphere)	left_pc	Thalamus	left	0.343693	0
Volume of Midbrain (whole brain)	midbrain	Brainstem	right	0.10803	2.01443e-71
Volume of MDm (left hemisphere)	left_mdm	Thalamus	left	0.389388	0
Volume of Pons (whole brain)	pons	Brainstem	right	0.0992838	1.47097e-60
Volume of L-Sg (left hemisphere)	left_l_sg	Thalamus	left	-0.0887468	1.05844e-48
Volume of VLa (right hemisphere)	right_vla	Thalamus	right	0.392451	0
Volume of Medulla (whole brain)	medulla	Brainstem	right	0.110127	3.63052e-74
Volume of PuM (right hemisphere)	right_pum	Thalamus	right	0.249649	0
Volume of VAmc (left hemisphere)	left_vamc	Thalamus	left	0.268146	0
Volume of CL (right hemisphere)	right_cl	Thalamus	right	0.00125763	0.835676
Volume of HATA (left hemisphere)	hata	HippoAmyg	left	0.400986	0
Volume of HATA (right hemisphere)	hata	HippoAmyg	right	0.34995	0
Volume of Whole-hippocampal-body (right hemisphere)	whole_hippocampal_body	HippoAmyg	right	0.40232	0
Volume of CeM (left hemisphere)	left_cem	Thalamus	left	0.239981	0
Volume of Whole-brainstem (whole brain)	right_r	Thalamus	right	0.110241	2.56706e-74
Volume of VLp (right hemisphere)	right_vlp	Thalamus	right	0.395045	0
Volume of LGN (right hemisphere)	right_lgn	Thalamus	right	0.423906	0
Volume of presubiculum-body (right hemisphere)	subiculum_body	HippoAmyg	right	0.35863	0
Volume of Pc (right hemisphere)	right_pc	Thalamus	right	0.366048	0
Volume of Cortical-nucleus (right hemisphere)	cortical_nucleus	HippoAmyg	right	0.290013	0
Volume of Whole-hippocampal-body (left hemisphere)	whole_hippocampal_body	HippoAmyg	left	0.413593	0
Volume of Anterior-amygdaloid-area-AAA (left hemisphere)	anterior_amygdaloid_area_aaa	HippoAmyg	left	0.264756	0
Volume of parasubiculum (right hemisphere)	parasubiculum	HippoAmyg	right	0.164334	5.55116e-164
Volume of MDl (right hemisphere)	right_mdl	Thalamus	right	0.193089	8.79452e-227
Volume of hippocampal-fissure (right hemisphere)	hippocampal_fissure	HippoAmyg	right	-0.276689	0
Volume of PuL (left hemisphere)	left_pul	Thalamus	left	0.0571674	3.84996e-21
Volume of LD (left hemisphere)	left_ld	Thalamus	left	0.115701	1.01679e-81
Volume of Whole-hippocampus (left hemisphere)	whole_hippocampus	HippoAmyg	left	0.46657	0
Volume of CA4-body (right hemisphere)	ca4_body	HippoAmyg	right	0.218618	1.1067e-291
Volume of Whole-amygdala (right hemisphere)	whole_amygdala	HippoAmyg	right	0.388446	0
Volume of parasubiculum (left hemisphere)	parasubiculum	HippoAmyg	left	0.17644	4.11668e-189
Volume of PuA (right hemisphere)	right_pua	Thalamus	right	0.237375	0
Volume of Accessory-Basal-nucleus (right hemisphere)	basal_nucleus	HippoAmyg	right	0.393791	0
Volume of VAmc (right hemisphere)	right_vamc	Thalamus	right	0.356784	0
Volume of CL (left hemisphere)	left_cl	Thalamus	left	0.0359359	3.04806e-09
Volume of MV(Re) (right hemisphere)	right_mv(re)	Thalamus	right	0.206535	7.1195e-260
Volume of subiculum-body (right hemisphere)	subiculum_body	HippoAmyg	right	0.292209	0
Volume of MGN (left hemisphere)	left_mgn	Thalamus	left	0.195382	2.96428e-232
Volume of PuM (left hemisphere)	left_pum	Thalamus	left	0.249182	0
Volume of Whole-thalamus (right hemisphere)	whole_thalamus	Thalamus	right	0.404401	0
Volume of CeM (right hemisphere)	right_cem	Thalamus	right	0.273394	0
Volume of Paralaminar-nucleus (left hemisphere)	paralaminar_nucleus	HippoAmyg	left	0.297796	0
Volume of Lateral-nucleus (right hemisphere)	lateral_nucleus	HippoAmyg	right	0.313169	0
Volume of subiculum-head (left hemisphere)	subiculum_head	HippoAmyg	left	0.361112	0
Volume of LD (right hemisphere)	right_ld	Thalamus	right	0.0618717	1.70615e-24
Volume of PuL (right hemisphere)	right_pul	Thalamus	right	0.0126752	0.0365581
Volume of Medial-nucleus (left hemisphere)	medial_nucleus	HippoAmyg	left	0.177967	2.04513e-192
Volume of Basal-nucleus (left hemisphere)	basal_nucleus	HippoAmyg	left	0.37387	0
Volume of Hippocampal-tail (left hemisphere)	hippocampal_tail	HippoAmyg	left	0.227285	0
Volume of CA4-body (left hemisphere)	ca4_body	HippoAmyg	left	0.21758	7.12969e-289
Volume of LGN (left hemisphere)	left_lgn	Thalamus	left	0.345694	0
Volume of Central-nucleus (left hemisphere)	central_nucleus	HippoAmyg	left	0.246149	0
Volume of molecular-layer-HP-head (right hemisphere)	molecular_layer_hp_head	HippoAmyg	right	0.309812	0
Volume of CA3-head (left hemisphere)	ca3_head	HippoAmyg	left	0.376861	0
Volume of Whole-hippocampal-head (left hemisphere)	whole_hippocampal_head	HippoAmyg	left	0.478102	0
Volume of GC-ML-DG-head (left hemisphere)	gc_ml_dg_head	HippoAmyg	left	0.424229	0
Volume of Whole-thalamus (left hemisphere)	whole_thalamus	Thalamus	left	0.376941	0
Volume of Corticoamygdaloid-transitio (right hemisphere)	corticoamygdaloid_transitio	HippoAmyg	right	0.378116	0
Volume of Whole-hippocampus (right hemisphere)	whole_hippocampus	HippoAmyg	right	0.435593	0
Volume of presubiculum-head (left hemisphere)	subiculum_head	HippoAmyg	left	0.373088	0
Volume of VA (left hemisphere)	left_va	Thalamus	left	0.238176	0
Volume of PuI (left hemisphere)	left_pui	Thalamus	left	0.220839	9.54965e-298
Volume of VM (left hemisphere)	left_vm	Thalamus	left	0.126179	5.96398e-97
Volume of CA4-head (right hemisphere)	ca4_head	HippoAmyg	right	0.312873	0
Volume of PuI (right hemisphere)	right_pui	Thalamus	right	0.186412	3.08031e-211
Volume of fimbria (left hemisphere)	fimbria	HippoAmyg	left	0.388827	0
Volume of MGN (right hemisphere)	right_mgn	Thalamus	right	0.250424	0
Volume of GC-ML-DG-body (left hemisphere)	gc_ml_dg_body	HippoAmyg	left	0.339324	0
Volume of MV(Re) (left hemisphere)	left_mv(re)	Thalamus	left	0.185175	2.0078e-208
Volume of fimbria (right hemisphere)	fimbria	HippoAmyg	right	0.371052	0
Volume of molecular-layer-HP-head (left hemisphere)	molecular_layer_hp_head	HippoAmyg	left	0.317732	0
Volume of L-Sg (right hemisphere)	right_l_sg	Thalamus	right	-0.163498	2.57518e-162
Volume of MDl (left hemisphere)	left_mdl	Thalamus	left	0.204733	2.66617e-255
Volume of hippocampal-fissure (left hemisphere)	hippocampal_fissure	HippoAmyg	left	-0.205302	9.71514e-257
Volume of CA3-body (left hemisphere)	ca3_body	HippoAmyg	left	0.106679	1.10274e-69
Volume of Whole-amygdala (left hemisphere)	whole_amygdala	HippoAmyg	left	0.412362	0
Volume of VA (right hemisphere)	right_va	Thalamus	right	0.314314	0
Volume of CA1-body (left hemisphere)	ca1_body	HippoAmyg	left	0.250761	0
Volume of LP (left hemisphere)	left_lp	Thalamus	left	0.182522	1.87329e-202
Volume of presubiculum-head (right hemisphere)	subiculum_head	HippoAmyg	right	0.359378	0
Volume of Anterior-amygdaloid-area-AAA (right hemisphere)	anterior_amygdaloid_area_aaa	HippoAmyg	right	0.270396	0
Volume of Cortical-nucleus (left hemisphere)	cortical_nucleus	HippoAmyg	left	0.25994	0
Volume of presubiculum-body (left hemisphere)	subiculum_body	HippoAmyg	left	0.351156	0
Volume of molecular-layer-HP-body (left hemisphere)	molecular_layer_hp_body	HippoAmyg	left	0.2021	1.08117e-248
Volume of Hippocampal-tail (right hemisphere)	hippocampal_tail	HippoAmyg	right	0.204722	2.85153e-255
Volume of PuA (left hemisphere)	left_pua	Thalamus	left	0.268686	0
Volume of CA1-head (right hemisphere)	ca1_head	HippoAmyg	right	0.361698	0
Volume of CM (right hemisphere)	right_cm	Thalamus	right	0.139149	1.09448e-117
Volume of Accessory-Basal-nucleus (left hemisphere)	basal_nucleus	HippoAmyg	left	0.428493	0
Volume of VLa (left hemisphere)	left_vla	Thalamus	left	0.327664	0
Volume of Basal-nucleus (right hemisphere)	basal_nucleus	HippoAmyg	right	0.341182	0
Volume of VLp (left hemisphere)	left_vlp	Thalamus	left	0.355212	0
Volume of Central-nucleus (right hemisphere)	central_nucleus	HippoAmyg	right	0.249644	0
Volume of CA1-head (left hemisphere)	ca1_head	HippoAmyg	left	0.411989	0
Volume of CA1-body (right hemisphere)	ca1_body	HippoAmyg	right	0.254803	0
Volume of Pt (left hemisphere)	left_pt	Thalamus	left	0.0537711	6.98412e-19
Volume of GC-ML-DG-body (right hemisphere)	gc_ml_dg_body	HippoAmyg	right	0.325009	0
Volume of AV (left hemisphere)	left_av	Thalamus	left	0.146793	6.84077e-131
Volume of Medial-nucleus (right hemisphere)	medial_nucleus	HippoAmyg	right	0.189968	1.92009e-219
Volume of SCP (whole brain)	scp	Brainstem	right	-0.00847454	0.162182
Volume of CA3-body (right hemisphere)	ca3_body	HippoAmyg	right	0.163664	1.20274e-162
