# Supplementary material for: Multimodal MRI marker of cognition explains the association between cognition and mental health in the UK Biobank
Source: eLife. 2026 May 20;14:RP108109. doi: 10.7554/eLife.108109 (PMC13189626; doi:10.7554/eLife.108109)
Supplement: Figure 6—source data 1. [file elife-108109-fig6-data1.xlsx]

## Sheet: Figure 6 dwMRI
Results of commonality analyses: the contribution of dwMRI neuroimaging phenotypes to the relationship between cognition and mental health.
dwMRI Feature	Unique: Mental Health	Unique: dwMRI	Common	Var. Exp. dwMRI	Total Var.
aparc.a2009s-I Streamline Count	7.29	3.334	1.736	19.27	12.36
Schaefer200-I SIFT2	7.43	3.304	1.596	17.72	12.33
Schaefer200-I Streamline Count	7.48	3.294	1.546	17.17	12.32
aparc-I Streamline Count	7.38	3.284	1.646	18.27	12.31
aparc-I Mean Length	7.46	3.174	1.566	17.39	12.2
aparc-I SIFT2	7.36	3.144	1.666	18.49	12.17
Schaefer200-I FA	7.5	3.084	1.526	16.94	12.11
aparc.a2009s-I SIFT2	7.46	3.024	1.566	17.39	12.05
aparc.a2009s-I FA	7.43	2.974	1.596	17.72	12
aparc-I FA	7.48	2.964	1.546	17.17	11.99
Schaefer500-IV SIFT2	7.57	2.934	1.456	16.17	11.96
Glasser-IV SIFT2	7.57	2.904	1.456	16.17	11.93
L2 TBSS	7.66	2.904	1.366	15.17	11.93
Schaefer500-IV Streamline Count	7.63	2.894	1.396	15.5	11.92
Glasser-IV Streamline Count	7.63	2.884	1.396	15.5	11.91
aparc.a2009s-I Mean Length	7.54	2.874	1.486	16.5	11.9
Glasser-IV FA	7.74	2.874	1.286	14.29	11.9
Schaefer500-IV FA	7.81	2.754	1.216	13.51	11.78
Glasser-I FA	7.81	2.744	1.216	13.51	11.77
L1 TBSS	7.73	2.714	1.296	14.4	11.74
FA TBSS	7.82	2.704	1.206	13.4	11.73
L3 TBSS	7.8	2.694	1.226	13.62	11.72
MD TBSS	7.87	2.654	1.156	12.85	11.68
Schaefer200-I Mean Length	7.66	2.654	1.366	15.17	11.68
Glasser-I SIFT2	7.72	2.604	1.306	14.51	11.63
Glasser-I Streamline Count	7.76	2.584	1.266	14.06	11.61
ICVF TBSS	7.77	2.534	1.256	13.95	11.56
MD Prob.	7.85	2.514	1.176	13.07	11.54
Glasser-IV Mean Length	7.89	2.424	1.136	12.62	11.45
Glasser-I Mean Length	7.93	2.364	1.096	12.18	11.39
L3 Prob.	7.92	2.344	1.106	12.29	11.37
L2 Prob.	7.94	2.234	1.086	12.07	11.26
ISOVF TBSS	8.11	2.134	0.916	10.19	11.16
L1 Prob.	7.96	2.074	1.066	11.85	11.1
ICVF Prob.	8.12	1.874	0.906	10.08	10.9
OD TBSS	8.12	1.704	0.906	10.08	10.73
MO TBSS	8.17	1.694	0.856	9.52	10.72
Schaefer500-IV Mean Length	8.33	1.524	0.696	7.75	10.55
ISOVF Prob.	8.28	1.524	0.746	8.31	10.55
FA Prob.	8.39	1.454	0.636	7.09	10.48
OD Prob.	8.7	0.534	0.326	3.65	9.56
MO Prob.	8.84	0.384	0.186	2.1	9.41

## Sheet: Figure 6 rsMRI
Results of commonality analyses: the contribution of rsMRI neuroimaging phenotypes to the relationship between cognition and mental health.
rsMRI Feature	Unique: Mental Health	Unique: rsMRI	Common	Var. Exp. rsMRI	Total Var.
55 IC Func. Connectivity	6.64	5.825	2.305	25.81	14.77
Schaefer200-I Func. Connectivity	6.97	4.785	1.975	22.12	13.73
Schaefer500-IV Func. Connectivity	7.35	4.355	1.595	17.88	13.3
Glasser-I Func. Connectivity	7.41	4.135	1.535	17.21	13.08
Glasser-IV Func. Connectivity	7.43	3.885	1.515	16.98	12.83
21 IC Func. Connectivity	7.53	3.515	1.415	15.87	12.46
aparc.a2009s-I Func. Connectivity	7.45	3.505	1.495	16.76	12.45
aparc-I Func. Connectivity	7.43	3.335	1.515	16.98	12.28
55 IC Amplitudes	8.32	1.345	0.625	6.94	10.29
21 IC Amplitudes	8.58	0.765	0.365	4.03	9.71

## Sheet: Figure 6 sMRI
Results of commonality analyses: the contribution of sMRI neuroimaging phenotypes to the relationship between cognition and mental health.
sMRI Feature	Unique: Mental Health	Unique: sMRI	Common	Var. Exp. sMRI	Total Var.
Subcortical Volumetric Subseg.	6.89	4.175	1.915	21.79	12.98
ASEG Volume	6.98	3.975	1.825	20.68	12.78
FSL FAST	7.29	3.405	1.515	17.25	12.21
Whole-brain T1/T2	7.47	3.155	1.335	15.21	11.96
Desikan GM/WM Intensity	7.56	2.605	1.245	14.19	11.41
ASEG Mean Thickness	7.44	2.595	1.365	15.45	11.4
aparc.a2009s Volume	7.81	2.195	0.995	11.35	11
aparc.a2009s Mean Thickness	7.98	1.615	0.825	9.32	10.42
FSL FIRST	7.96	1.615	0.845	9.55	10.42
aparc.a2009s Area	7.95	1.605	0.855	9.76	10.41
DKT Volume	8.03	1.555	0.775	8.85	10.36
Desikan WM Volume	8.06	1.495	0.745	8.41	10.3
BA ex-vivo Volume	8.1	1.465	0.705	7.95	10.27
Desikan WM Mean Thickness	8.05	1.435	0.755	8.63	10.24
DKT Mean Thickness	8.08	1.435	0.725	8.18	10.24
Desikan Pial	8.14	1.375	0.665	7.5	10.18
DKT Area	8.18	1.115	0.625	7.05	9.92
Desikan WM Area	8.13	1.075	0.675	7.72	9.88
BA ex-vivo Mean Thickness	8.3	0.985	0.505	5.68	9.79
BA ex-vivo Area	8.39	0.725	0.415	4.77	9.53
