# Supplementary material for: Multimodal MRI marker of cognition explains the association between cognition and mental health in the UK Biobank
Source: eLife. 2026 May 20;14:RP108109. doi: 10.7554/eLife.108109 (PMC13189626; doi:10.7554/eLife.108109)
Supplement: Figure 7—source data 1. [file elife-108109-fig7-data1.xlsx]

## Sheet: Figure 7
PLSR performance of individual neuroimaging phenotypes.						The proportion of the cognition–mental health relationship captured by neuroimaging phenotypes.
dwMRI Feature	R2	Pearson r	MSE	MAE		dwMRI Feature	Unique: Mental Health	Unique: dwMRI	Common	Var. Exp. dwMRI	Total Var.
aparc MSA I Connectome Streamline Count	0.052	0.226	0.569	0.596		aparc.a2009s-I Streamline Count	7.29	3.334	1.736	19.27	12.36
aparc MSA I Connectome SIFT2	0.051	0.224	0.569	0.596		Schaefer200-I SIFT2	7.43	3.304	1.596	17.72	12.33
aparc a2009s MSA I Connectome Streamline Count	0.05	0.227	0.57	0.597		Schaefer200-I Streamline Count	7.48	3.294	1.546	17.17	12.32
Schaefer7n200p MSA I Connectome Streamline Count	0.049	0.221	0.57	0.597		aparc-I Streamline Count	7.38	3.284	1.646	18.27	12.31
Schaefer7n200p MSA I Connectome SIFT2	0.048	0.221	0.571	0.598		aparc-I Mean Length	7.46	3.174	1.566	17.39	12.2
aparc MSA I Connectome FA	0.048	0.214	0.571	0.597		aparc-I SIFT2	7.36	3.144	1.666	18.49	12.17
aparc a2009s MSA I Connectome FA	0.047	0.213	0.572	0.597		Schaefer200-I FA	7.5	3.084	1.526	16.94	12.11
aparc MSA I Connectome Mean Length	0.047	0.215	0.571	0.597		aparc.a2009s-I SIFT2	7.46	3.024	1.566	17.39	12.05
aparc a2009s MSA I Connectome SIFT2	0.046	0.215	0.572	0.598		aparc.a2009s-I FA	7.43	2.974	1.596	17.72	12
L2 TBSS	0.045	0.207	0.576	0.601		aparc-I FA	7.48	2.964	1.546	17.17	11.99
Schaefer7n200p MSA I Connectome FA	0.045	0.21	0.573	0.598		Schaefer500-IV SIFT2	7.57	2.934	1.456	16.17	11.96
aparc a2009s MSA I Connectome Mean Length	0.043	0.207	0.574	0.599		Glasser-IV SIFT2	7.57	2.904	1.456	16.17	11.93
Glasser MSA IV Connectome SIFT2	0.043	0.204	0.574	0.599		L2 TBSS	7.66	2.904	1.366	15.17	11.93
Glasser MSA IV Connectome Streamline Count	0.043	0.202	0.574	0.599		Schaefer500-IV Streamline Count	7.63	2.894	1.396	15.5	11.92
L3 TBSS	0.042	0.2	0.578	0.602		Glasser-IV Streamline Count	7.63	2.884	1.396	15.5	11.91
ICVF TBSS	0.042	0.199	0.578	0.602		aparc.a2009s-I Mean Length	7.54	2.874	1.486	16.5	11.9
Glasser MSA IV Connectome FA	0.042	0.195	0.574	0.599		Glasser-IV FA	7.74	2.874	1.286	14.29	11.9
Schaefer7n500p MSA IV Connectome SIFT2	0.041	0.204	0.575	0.599		Schaefer500-IV FA	7.81	2.754	1.216	13.51	11.78
L1 TBSS	0.041	0.197	0.579	0.603		Glasser-I FA	7.81	2.744	1.216	13.51	11.77
Schaefer7n500p MSA IV Connectome Streamline Count	0.041	0.202	0.575	0.599		L1 TBSS	7.73	2.714	1.296	14.4	11.74
FA TBSS	0.041	0.198	0.579	0.602		FA TBSS	7.82	2.704	1.206	13.4	11.73
Glasser MSA I Connectome FA	0.04	0.191	0.575	0.6		L3 TBSS	7.8	2.694	1.226	13.62	11.72
Schaefer7n200p MSA I Connectome Mean Length	0.039	0.196	0.576	0.6		MD TBSS	7.87	2.654	1.156	12.85	11.68
MD TBSS	0.039	0.194	0.58	0.603		Schaefer200-I Mean Length	7.66	2.654	1.366	15.17	11.68
MD Probabilistic	0.039	0.19	0.58	0.603		Glasser-I SIFT2	7.72	2.604	1.306	14.51	11.63
Glasser MSA I Connectome Streamline Count	0.037	0.191	0.577	0.6		Glasser-I Streamline Count	7.76	2.584	1.266	14.06	11.61
L3 Probabilistic	0.037	0.186	0.582	0.604		ICVF TBSS	7.77	2.534	1.256	13.95	11.56
Schaefer7n500p MSA IV Connectome FA	0.037	0.19	0.577	0.6		MD Prob.	7.85	2.514	1.176	13.07	11.54
Glasser MSA I Connectome SIFT2	0.037	0.192	0.577	0.6		Glasser-IV Mean Length	7.89	2.424	1.136	12.62	11.45
L2 Probabilistic	0.035	0.181	0.582	0.604		Glasser-I Mean Length	7.93	2.364	1.096	12.18	11.39
L1 Probabilistic	0.033	0.178	0.583	0.605		L3 Prob.	7.92	2.344	1.106	12.29	11.37
ISOVF TBSS	0.032	0.175	0.584	0.605		L2 Prob.	7.94	2.234	1.086	12.07	11.26
Glasser MSA IV Connectome Mean Length	0.031	0.181	0.58	0.602		ISOVF TBSS	8.11	2.134	0.916	10.19	11.16
Glasser MSA I Connectome Mean Length	0.03	0.178	0.581	0.602		L1 Prob.	7.96	2.074	1.066	11.85	11.1
OD TBSS	0.029	0.165	0.586	0.606		ICVF Prob.	8.12	1.874	0.906	10.08	10.9
ICVF Probabilistic	0.029	0.165	0.586	0.606		OD TBSS	8.12	1.704	0.906	10.08	10.73
MO TBSS	0.028	0.163	0.586	0.606		MO TBSS	8.17	1.694	0.856	9.52	10.72
ISOVF Probabilistic	0.023	0.15	0.588	0.608		Schaefer500-IV Mean Length	8.33	1.524	0.696	7.75	10.55
FA Probabilistic	0.022	0.141	0.59	0.609		ISOVF Prob.	8.28	1.524	0.746	8.31	10.55
Schaefer7n500p MSA IV Connectome Mean Length	0.018	0.145	0.587	0.606		FA Prob.	8.39	1.454	0.636	7.09	10.48
OD Probabilistic	0.01	0.099	0.596	0.612		OD Prob.	8.7	0.534	0.326	3.65	9.56
MO Probabilistic	0.006	0.076	0.598	0.613		MO Prob.	8.84	0.384	0.186	2.1	9.41
rsMRI Feature	R2	Pearson r	MSE	MAE		rsMRI Feature	Unique: Mental Health	Unique: rsMRI	Common	Var. Exp. rsMRI	Total Var.
Tangent matrices 55 IC	0.088	0.302	0.552	0.587		55 IC Func. Connectivity	6.64	5.825	2.305	25.81	14.77
Schaefer7n200p MSA I Full correlation	0.071	0.271	0.557	0.589		Schaefer200-I Func. Connectivity	6.97	4.785	1.975	22.12	13.73
Schaefer7n500p MSA IV Full correlation	0.058	0.252	0.563	0.593		Schaefer500-IV Func. Connectivity	7.35	4.355	1.595	17.88	13.3
Glasser MSA I Full correlation	0.057	0.249	0.564	0.593		Glasser-I Func. Connectivity	7.41	4.135	1.535	17.21	13.08
Tangent matrices 21 IC	0.054	0.232	0.571	0.599		Glasser-IV Func. Connectivity	7.43	3.885	1.515	16.98	12.83
Glasser MSA IV Full correlation	0.053	0.243	0.566	0.595		21 IC Func. Connectivity	7.53	3.515	1.415	15.87	12.46
aparc MSA I Full correlation	0.052	0.232	0.567	0.596		aparc.a2009s-I Func. Connectivity	7.45	3.505	1.495	16.76	12.45
aparc a2009s MSA I Full correlation	0.051	0.233	0.569	0.597		aparc-I Func. Connectivity	7.43	3.335	1.515	16.98	12.28
Amplitudes 55 IC	0.019	0.14	0.59	0.608		55 IC Amplitudes	8.32	1.345	0.625	6.94	10.29
Amplitudes 21 IC	0.013	0.112	0.594	0.611		21 IC Amplitudes	8.58	0.765	0.365	4.03	9.71
sMRI Feature	R2	Pearson r	MSE	MAE		sMRI Feature	Unique: Mental Health	Unique: sMRI	Common	Var. Exp. sMRI	Total Var.
Subcortical volumetric subsegmentation	0.068	0.244	0.564	0.593		Subcortical Volumetric Subseg.	6.89	4.175	1.915	21.79	12.98
ASEG volume	0.059	0.235	0.568	0.595		ASEG Volume	6.98	3.975	1.825	20.68	12.78
FSL FAST	0.051	0.219	0.572	0.598		FSL FAST	7.29	3.405	1.515	17.25	12.21
Whole-brain T1/T2	0.047	0.209	0.567	0.596		Whole-brain T1/T2	7.47	3.155	1.335	15.21	11.96
ASEG mean intensity	0.043	0.199	0.577	0.601		Desikan GM/WM Intensity	7.56	2.605	1.245	14.19	11.41
Desikan grey/white matter intensity	0.043	0.203	0.576	0.601		ASEG Mean Thickness	7.44	2.595	1.365	15.45	11.4
aparc a2009s volume	0.034	0.18	0.582	0.604		aparc.a2009s Volume	7.81	2.195	0.995	11.35	11
aparc a2009s mean thickness	0.027	0.161	0.586	0.606		aparc.a2009s Mean Thickness	7.98	1.615	0.825	9.32	10.42
Desikan-Killiany-Tourville volume	0.025	0.157	0.586	0.606		FSL FIRST	7.96	1.615	0.845	9.55	10.42
Desikan white matter mean thickness	0.024	0.151	0.587	0.607		aparc.a2009s Area	7.95	1.605	0.855	9.76	10.41
Desikan-Killiany-Tourville mean thickness	0.024	0.152	0.587	0.606		DKT Volume	8.03	1.555	0.775	8.85	10.36
aparc a2009s area	0.024	0.155	0.587	0.606		Desikan WM Volume	8.06	1.495	0.745	8.41	10.3
Desikan white matter volume	0.023	0.152	0.587	0.607		BA ex-vivo Volume	8.1	1.465	0.705	7.95	10.27
FSL FIRST	0.023	0.146	0.588	0.607		Desikan WM Mean Thickness	8.05	1.435	0.755	8.63	10.24
Desikan pial	0.021	0.144	0.589	0.608		DKT Mean Thickness	8.08	1.435	0.725	8.18	10.24
BA ex-vivo volume	0.021	0.143	0.589	0.608		Desikan Pial	8.14	1.375	0.665	7.5	10.18
BA ex-vivo mean thickness	0.018	0.132	0.591	0.608		DKT Area	8.18	1.115	0.625	7.05	9.92
Desikan-Killiany-Tourville area	0.018	0.132	0.59	0.608		Desikan WM Area	8.13	1.075	0.675	7.72	9.88
Desikan white matter area	0.017	0.131	0.591	0.608		BA ex-vivo Mean Thickness	8.3	0.985	0.505	5.68	9.79
BA ex-vivo area	0.008	0.089	0.596	0.611		BA ex-vivo Area	8.39	0.725	0.415	4.77	9.53
