# Supplementary material for: Multimodal MRI marker of cognition explains the association between cognition and mental health in the UK Biobank
Source: eLife. 2026 May 20;14:RP108109. doi: 10.7554/eLife.108109 (PMC13189626; doi:10.7554/eLife.108109)
Supplement: Figure 8—source data 1. [file elife-108109-fig8-data1.xlsx]

## Sheet: Figure 8a
Distributions of the g-factor derived from cognitive tests via ESEM and predicted from stacked dwMRI phenotypes.
Fold	Observed g-factor	Predicted g-factor
0	-0.153673	0.114396
0	0.785074	0.451244
0	-0.235547	0.803159
0	-1.28582	-0.379469
0	0.213568	-0.228204
0	0.975946	-0.154923
0	-0.153935	-0.558307
0	-0.496294	-0.269346
0	-1.42091	-0.534174
0	-0.445229	0.362945
0	-2.67377	-0.77826
0	0.631658	0.379116
0	-1.45693	0.0756445
0	0.750321	-0.291591
0	0.838404	-0.269975
0	1.25575	-0.163851
0	-0.486408	0.108764
0	0.189372	-0.370601
0	0.454372	0.206636
0	-0.253099	-0.117614
0	0.302931	-0.18701
0	0.75083	-0.178398
0	-0.598778	-0.50495
0	-1.02976	-0.452776
0	0.545308	0.362887
0	1.1274	-0.182749
0	1.01342	0.337451
0	-0.724356	0.190779
0	-1.01068	-0.911459
0	1.72973	-0.470853
0	1.49775	0.058835
0	-0.401229	0.694815
0	-1.65613	0.346173
0	-0.799289	-0.17139
0	-2.22484	0.458229
0	0.41981	0.0724747
0	0.13165	0.307229
0	-0.0626253	0.110181
0	-0.84586	-0.0728858
0	-1.32288	-0.0322273
0	0.708446	0.0587066
0	-1.64795	-0.762759
0	-1.09408	-0.059442
0	0.645282	0.11692
0	0.215278	0.323812
0	-0.0113356	-0.123885
0	-0.669071	0.0781304
0	1.08042	-0.0703511
0	-2.09153	0.323053
0	1.66932	0.318628
0	-1.17442	0.0387256
0	0.315574	-0.110912
0	-1.46354	0.071178
0	0.430454	0.0600055
0	-1.19017	0.0887112
0	1.21736	0.333194
0	0.102947	-0.202005
0	-0.288037	0.275925
0	1.79355	-0.0218345
0	-0.877715	0.154834
0	0.717069	0.456246
0	0.929465	-0.315564
0	0.411434	-0.374272
0	0.266034	0.096901
0	-0.511388	0.737041
0	0.923956	0.235582
0	1.1498	0.1424
0	0.506197	0.582886
0	-0.287723	0.243806
0	0.48638	-0.112415
0	-2.26189	0.195454
0	-1.26944	-0.0373363
0	0.345353	0.17251
0	0.923353	-0.0935856
0	-0.435474	-0.341926
0	-0.686388	-0.0712547
0	0.772709	-0.250711
0	1.24274	0.263565
0	0.338347	0.232778
0	-1.02546	0.337786
0	0.0952094	0.429941
0	-0.216814	-0.0793272
0	0.875757	-0.215618
0	0.166916	-0.360902
0	0.494361	-0.458407
0	0.156795	-0.0560552
0	0.12895	0.306839
0	0.0180291	0.353937
0	1.02815	-0.0954879
0	0.595412	0.0622034
0	-0.206322	0.625251
0	2.69306	0.208922
0	0.976754	-0.730873
0	0.865872	0.00173215
0	1.72936	-0.420934
0	0.556628	0.376841
0	-0.392888	0.228886
0	0.543393	0.179354
0	0.177638	-0.969571
0	-0.0365259	0.163959
0	0.681568	-0.340296
0	1.22055	-0.18902
0	-0.747019	-0.0544527
0	-0.256152	0.0513349
0	0.129613	0.326229
0	0.739675	-0.326873
0	-0.201525	-0.194849
0	-0.324401	-0.0798095
0	-1.23953	-0.362578
0	1.14822	0.358233
0	1.30648	0.709787
0	-0.828167	-0.0696998
0	-0.119584	-0.143645
0	-0.119859	-0.652806
0	1.00184	-0.841518
0	-0.0125332	0.168599
0	-1.61319	0.34097
0	-1.14311	0.166091
0	1.13367	0.617148
0	-0.901013	-0.0034127
0	-0.840405	-0.120738
0	-1.56407	0.141942
0	-1.10139	-0.215247
0	0.529401	0.240337
0	-0.783803	-0.127383
0	-1.3013	-0.125194
0	0.519441	-0.597184
0	-1.70446	-0.486749
0	0.810534	-0.0944587
0	1.82361	-0.137133
0	-0.666645	-0.0834956
0	0.191715	0.706458
0	-0.401847	-0.709444
0	-0.0904767	0.16027
0	0.0878004	-0.0904237
0	-0.00610891	0.639654
0	-0.752539	-0.121036
0	0.399494	0.138287
0	0.148026	0.426221
0	0.625689	0.239838
0	0.887165	0.334659
0	-0.75638	0.0827385
0	1.14893	-0.035315
0	-0.512246	0.133679
0	-0.464461	-0.338896
0	0.164882	-0.4599
0	0.0439087	0.0467514
0	0.664458	0.247916
0	1.3173	-0.230373
0	-0.840089	0.270525
0	-1.79026	-0.749501
0	-0.612417	-0.54187
0	-0.520324	0.288969
0	0.463561	0.305774
0	-0.0572092	0.133534
0	0.299785	-0.321834
0	-1.11956	0.10247
0	-1.65396	-0.367808
0	-1.13336	0.408824
0	0.654661	0.175237
0	-0.112708	0.596735
0	0.0502981	-0.215194
0	0.643826	-0.00615367
0	0.377758	-0.484902
0	0.628066	-0.246237
0	0.579994	0.485863
0	-0.99981	-0.314114
0	0.567995	0.339233
0	1.21495	0.173412
0	-0.365639	0.346526
0	-1.40511	-0.167328
0	0.142613	-0.682233
0	0.380747	0.153873
0	0.494504	-0.0455584
0	-2.1634	-0.173582
0	-0.0659139	0.327165
0	0.735807	-0.353746
0	1.73319	0.34161
0	-0.0224623	0.0953494
0	0.809498	-0.143019
0	-0.109777	-0.155501
0	-0.70816	-0.0331886
0	-0.0485605	0.274472
0	-0.163181	-0.685264
0	-1.79493	-0.671951
0	0.149826	-0.0968286
0	-0.342627	0.223479
0	1.37145	0.178079
0	-0.170644	-0.114656
0	0.0355646	-0.651593
0	0.417969	0.356688
0	0.782174	-0.460762
0	1.69098	0.517706
0	0.684324	0.300473
0	-2.17045	-0.224832
0	-0.0944424	0.13344
0	1.26693	-0.233248
0	-1.03708	-0.699901
0	-1.2489	0.0354022
0	0.622199	0.19686
0	0.728492	-0.320322
0	0.648172	-0.218906
0	-0.451377	0.265547
0	-0.0335522	0.276083
0	-0.15038	0.135428
0	0.0984542	0.344207
0	-0.252308	0.199107
0	0.639817	-0.477855
0	-0.125871	0.333563
0	-0.376176	-0.274139
0	0.239848	0.222663
0	0.796413	0.042931
0	-0.179316	0.260931
0	-1.17238	-0.168258
0	0.504769	0.126255
0	0.444835	-0.651105
0	-0.437397	0.777855
0	0.761456	-0.398498
0	-0.409252	0.0118173
0	-0.17294	0.0205104
0	-0.830982	0.0147603
0	-0.484293	0.323224
0	-0.501829	0.246772
0	-0.891404	-0.65108
0	1.11881	-0.285773
0	1.16343	-0.086594
0	0.838284	-0.172536
0	0.152921	0.305468
0	1.03445	-0.213637
0	-0.234287	-0.00560343
0	-0.0974955	-0.223339
0	-0.481769	-0.877487
0	-0.945753	0.468967
0	0.180581	-0.254431
0	1.03287	0.260851
0	0.101778	0.210865
0	-0.230633	-0.078857
0	0.223518	-0.0173149
0	0.56872	0.194789
0	0.307428	0.150217
0	0.747002	0.223421
0	0.297973	0.100635
0	-0.0992835	-0.302205
0	1.50487	0.0319599
0	-0.674334	0.760316
0	0.666531	0.578798
0	0.0997899	-0.144011
0	-0.00588718	-0.127623
0	-0.0765256	0.16623
0	-1.21356	-0.292152
0	-0.446642	-0.348873
0	1.22061	0.600661
0	0.188236	-0.766651
0	-0.0563731	0.0260402
0	0.681293	0.24935
0	1.91311	0.229265
0	-1.11268	0.222336
0	-0.199739	-0.247141
0	-0.49902	-0.329604
0	-0.983861	-0.548025
0	1.36323	0.535145
0	1.06558	-0.199286
0	-0.587483	-0.578356
0	0.244051	0.109587
0	-0.304131	-0.192281
0	0.457033	-0.305781
0	-0.199209	0.00759464
0	0.674522	-0.201916
0	1.09782	-0.218838
0	-0.466094	-0.0378661
0	-1.61048	-0.394115
0	-2.02713	0.294908
0	0.748488	-0.0279295
0	0.27822	0.299559
0	-1.30244	0.154367
0	1.98617	0.393063
0	-0.507824	0.686378
0	0.768167	-0.14593
0	0.581818	-0.0394963
0	-2.67624	-0.15864
0	1.38259	-0.354047
0	0.174959	-0.132435
0	1.49733	0.256766
0	0.612768	0.389321
0	-1.25365	-0.169005
0	-1.19242	0.311251
0	0.899026	0.338097
0	0.338894	-0.237709
0	0.0643625	-0.463189
0	-0.087534	-0.666407
0	0.0207149	-0.108259
0	0.257474	0.27314
0	1.44828	0.622482
0	-0.366695	-0.165386
0	0.961896	0.539099
0	-0.847071	-0.848225
0	-0.854775	0.206718
0	0.927097	0.740055
0	-0.150322	-0.285316
0	0.558896	0.27072
0	-0.319614	-0.897676
0	-0.0113656	0.210387
0	-1.38202	-0.688107
0	-0.0858913	-0.0455554
0	-0.296191	-0.247054
0	-0.593033	0.246364
0	-0.402931	0.676956
0	-0.370694	-0.483181
0	-0.464177	0.298336
0	-1.02361	-0.255078
0	0.623355	-0.694517
0	0.716985	0.688763
0	1.669	0.0790346
0	-1.48648	-0.34589
0	-0.393916	0.163026
0	1.0065	0.149793
0	-1.04904	-0.313792
0	0.822005	-0.534786
0	-0.774045	-0.207615
0	1.52334	0.038903
0	1.73006	0.549006
0	-0.839084	0.32552
0	-2.59211	0.352824
0	-1.09119	0.469699
0	-0.162258	-0.240906
0	0.468676	0.393724
0	0.288951	0.376041
0	-0.319198	-0.242875
0	0.876376	0.279719
0	0.757987	-0.470032
0	-0.250048	-0.415512
0	0.425024	-0.11203
0	-1.70259	-0.48588
0	-0.766013	0.207574
0	-0.797215	-0.359614
0	-0.267281	0.095205
0	1.27545	0.0627685
0	1.87564	-0.226443
0	0.509595	-0.26978
0	0.456141	0.357539
0	0.35412	0.333576
0	1.12814	-0.0797594
0	1.00801	0.401026
0	0.534806	0.535605
0	1.20164	-0.534595
0	-1.27079	0.452631
0	1.06375	0.208873
0	-0.625117	0.0747171
0	-0.578504	-0.629699
0	-0.181755	0.306325
0	1.50824	0.390185
0	0.816295	-0.30422
0	1.26293	0.165763
0	-0.916023	0.0826807
0	-0.898503	-0.409277
0	0.822549	0.524527
0	-1.38702	-0.0596839
0	0.34489	0.00577708
0	0.361439	0.441135
0	0.962491	0.22629
0	-1.00737	-0.231747
0	1.18363	-0.0798794
0	-0.679124	-0.732693
0	0.386988	-0.0649192
0	-1.10685	-0.614184
0	-1.44067	0.173018
0	0.684525	0.303622
0	-0.183242	0.493801
0	-1.27377	0.25259
0	0.773018	0.187082
0	0.613843	0.19808
0	0.152326	0.326397
0	-1.81736	-0.902278
0	0.542635	-0.171389
0	-1.36319	-0.243595
0	-1.11557	-0.0443801
0	-0.527282	0.0810963
0	-0.501551	-0.262704
0	-0.216456	-0.954718
0	-0.741884	-0.196611
0	0.755063	0.0465033
0	-0.0387279	0.00861965
0	-0.452128	-0.184714
0	2.97573	0.598176
0	-0.454925	-0.0602203
0	-1.36998	-0.165033
0	-0.191449	-0.464123
0	-0.112765	-0.583606
0	0.486263	0.185256
0	2.08243	-0.014975
0	0.913921	0.191972
0	0.329451	-0.0864675
0	0.753231	-0.125991
0	0.927239	0.42611
0	-0.0166223	-0.207684
0	1.68821	-0.0815086
0	0.54234	0.159303
0	0.390675	0.298222
0	1.90027	0.477473
0	-0.323936	0.319625
0	0.301702	-0.190669
0	0.871496	0.139884
0	-0.958026	-0.556299
0	-0.402176	0.282612
0	-0.00925749	-0.302796
0	2.05965	0.549596
0	0.439002	0.370821
0	2.48419	0.436631
0	-2.15864	0.475571
0	-0.187967	0.411322
0	0.928942	0.0115574
0	0.113098	0.290338
0	-0.339779	-0.02079
0	0.577612	0.215743
0	0.0582529	0.534251
0	-0.795291	0.0337396
0	-1.3674	-0.244634
0	-0.212235	-0.356171
0	0.5809	0.291207
0	-1.16469	-0.361221
0	-0.848711	-0.185789
0	-1.02267	0.143876
0	0.511813	0.312695
0	-0.964957	-0.24292
0	-0.719876	-0.439339
0	-0.441012	0.159141
0	0.951174	0.187938
0	-1.21557	-0.033146
0	-0.958673	0.255822
0	-0.663754	-0.1556
0	1.22295	-0.263821
0	1.56549	-0.396089
0	1.20178	-0.0903855
0	-1.09052	-0.0552175
0	-0.807055	0.143315
0	-0.247981	0.26679
0	1.15959	0.382026
0	0.06845	0.0309309
0	-0.173105	-0.475937
0	-2.11706	-0.220435
0	0.469314	-0.278531
0	-0.193614	-0.604204
0	-2.61422	-0.352623
0	-1.8233	-0.398368
0	0.890305	0.0384318
0	-0.601915	0.326786
0	0.253361	0.342686
0	-2.46267	-0.0898835
0	-2.08765	-0.627127
0	-0.181058	-0.122851
0	1.66908	0.564673
0	-0.986077	0.382849
0	-0.692688	-0.751441
0	0.18546	0.314506
0	0.910423	0.190453
0	1.49207	-0.331673
0	1.35062	-0.036055
0	0.516925	0.439432
0	0.336349	-0.150035
0	0.63989	0.192342
0	-0.167484	-0.788944
0	0.0759444	0.425677
0	0.443707	0.275828
0	0.189692	0.0988899
0	-0.679139	0.309347
0	-0.366561	0.077778
0	-0.227423	-0.104362
0	0.143855	0.205484
0	-0.277792	-0.0114615
0	-0.0869484	0.364481
0	-0.208468	-0.492075
0	-0.619264	-0.60821
0	0.0844263	-0.135995
0	0.21937	0.238604
0	-1.44992	0.128635
0	-2.22387	-0.110666
0	-1.09465	0.175376
0	-0.840666	0.00658441
0	1.24727	0.259013
0	-2.22437	-0.444378
0	-0.701302	0.246402
0	-0.213688	0.140009
0	-0.209647	-0.31059
0	-1.21601	-0.909687
0	-1.71494	-0.412119
0	0.59011	0.112727
0	1.04019	0.276395
0	-0.751202	-0.384979
0	1.14602	0.362092
0	1.96355	0.671792
0	0.886788	-0.746546
0	-0.557571	-0.220453
0	-0.769736	-0.068618
0	-0.594784	-0.169552
0	0.395382	0.179997
0	-0.587212	0.41945
0	1.51107	0.372802
0	0.568489	0.1612
0	1.72518	-0.0814552
0	0.538058	0.43459
0	0.117949	-0.00348309
0	0.231751	0.609348
0	0.0337804	-0.186063
0	1.36817	0.460509
0	-0.506333	-0.229554
0	2.12023	0.294167
0	1.64908	0.452097
0	0.766749	0.556522
0	0.0504116	-0.879596
0	1.61537	0.475941
0	0.826923	0.0333569
0	-0.480825	-0.81012
0	-0.285115	0.102778
0	1.23568	-0.530583
0	-1.14603	-0.0514367
0	0.144745	-0.654825
0	-2.36661	-0.357403
0	-1.17753	-0.510223
0	1.12627	0.683439
0	0.0193447	-0.552754
0	0.522421	-0.205842
0	-0.237997	-0.375962
0	0.978654	-0.00483633
0	0.485356	0.408164
0	0.0948784	-0.223091
0	-0.362613	-0.298624
0	0.353261	-0.554337
0	-1.03756	-0.0351487
0	1.696	0.390664
0	-0.201975	0.466229
0	0.445073	-0.0051565
0	0.45687	-0.102026
0	0.681543	0.418552
0	1.08252	-0.221228
0	0.262767	-0.102686
0	0.263674	0.117763
0	0.947842	0.0398633
0	1.13657	0.148431
0	0.04972	0.0621351
0	0.0459007	-0.137345
0	1.77277	-0.00228153
0	-0.274762	-0.1038
0	-0.844326	-0.645928
0	0.81839	0.245087
0	1.09598	0.294855
0	-3.27363	0.153631
0	0.507913	-0.0472376
0	0.314716	0.0831383
0	1.11814	0.014998
0	-1.35365	-0.899752
0	-1.59131	0.306155
0	-0.850819	0.213796
0	-1.06732	0.646294
0	0.799078	-0.617337
0	-0.424121	0.237807
0	-1.02316	-0.679696
0	-0.780977	0.381996
0	0.877328	0.152289
0	1.62183	-0.431505
0	-0.275636	0.841988
0	-0.289992	0.106377
0	0.995214	0.648944
0	0.787055	0.153162
0	0.0805336	-0.0983151
0	-1.43239	0.0709376
0	2.04684	0.13252
0	-0.772273	0.119843
0	0.601765	0.290105
0	0.159306	-0.601697
0	1.74234	0.230253
0	0.15866	0.0263465
0	-0.492314	-0.244026
0	2.05923	0.387379
0	0.88411	-0.387832
0	-1.47757	-0.0560854
0	0.76268	0.346282
0	0.00401444	-0.229692
0	0.388901	0.244965
0	-0.38262	-0.100566
0	-1.78091	-0.616948
0	0.302856	0.186114
0	-0.210954	0.283535
0	0.197865	-0.0614134
0	0.121528	-0.492775
0	-0.49013	-0.0829442
0	0.636922	-0.135815
0	0.306808	0.37016
0	1.32403	0.786525
0	1.58799	0.329033
0	0.981893	0.194661
0	0.613794	0.256058
0	-1.3117	0.236604
0	-1.52871	-0.110816
0	0.596095	-0.165141
0	0.121633	0.384771
0	1.27451	-0.031616
0	1.12376	-0.00132465
0	-0.205716	-0.0476167
0	-1.90383	-0.345181
0	0.0318369	0.200901
0	0.471734	0.132145
0	-0.310894	0.074027
0	-0.243533	0.540979
0	-0.49005	-0.302711
0	-0.850243	0.199751
0	-0.370645	-0.307731
0	1.17254	0.387423
0	-0.571252	-0.332379
0	-1.17585	-0.339607
0	1.80829	0.426904
0	-0.83055	-0.379727
0	-1.16522	0.00121954
0	1.76114	0.24464
0	1.62585	0.0835976
0	0.560134	0.307659
0	0.278808	0.689732
0	1.06644	0.282541
0	-0.687774	-0.426242
0	0.926863	0.26388
0	1.19093	-0.179485
0	-1.19944	-0.0526603
0	0.222768	0.209995
0	2.0181	0.216015
0	1.42196	0.192398
0	1.10724	0.375872
0	0.956233	-0.497542
0	0.285986	-0.0498235
0	-0.347566	-0.429294
0	0.533699	-0.0631548
0	-2.12022	-0.831887
0	-0.588485	-0.104321
0	-1.80519	-0.318829
0	0.426661	0.156572
0	-0.267677	0.664837
0	-0.311961	0.0692964
0	0.75973	-0.335169
0	1.95782	0.248236
0	-0.224658	-0.15532
0	-0.169557	-0.432264
0	0.768503	-0.0277184
0	0.680904	0.000546119
0	0.713269	0.274615
0	-0.0834443	-0.142427
0	1.42705	-0.292402
0	-2.64209	-0.9277
0	-0.337787	0.486957
0	0.317494	0.22687
0	0.165415	-0.0415614
0	-0.408712	-0.0947549
0	-1.91556	-0.188683
0	-1.49393	0.433032
0	-1.35406	-0.134809
0	0.745031	0.130321
0	-0.447827	-0.726117
0	0.996781	0.225665
0	0.437124	0.4182
0	0.942109	0.363459
0	0.0859928	0.112635
0	-0.0388577	0.146931
0	-1.30947	-0.299561
0	-1.75198	-0.807737
0	-1.9425	0.143867
0	-0.532524	0.0744698
0	0.295391	0.451499
0	-0.255299	-0.1955
0	0.523568	-0.247689
0	-1.00212	0.128551
0	2.04281	-0.221705
0	0.252407	0.214794
0	0.42817	-0.314149
0	0.685174	-0.711785
0	0.323061	0.219151
0	-0.423953	-0.199776
0	0.532607	0.067145
0	-0.83991	0.0724052
0	-0.417358	-0.531497
0	-0.662233	-0.19751
0	0.794817	0.248586
0	0.390584	0.544872
0	-2.18266	0.737315
0	0.0609569	-0.13246
0	-0.534161	0.70276
0	0.714349	0.238568
0	-2.20874	-0.265363
0	1.58477	0.519029
0	0.798835	-0.37824
0	-1.85263	-0.431867
0	0.16118	-0.140763
0	0.393399	0.0480331
0	-0.817074	0.244129
0	-0.287215	-0.0789084
0	0.163887	-0.299469
0	0.555252	-0.0893488
0	-0.83242	-0.40171
0	0.492059	0.119406
0	-0.386806	-0.0757819
0	0.214781	-0.0867508
0	0.145843	-0.0705033
0	-1.44631	0.0812133
0	0.121872	-0.311762
0	-0.20811	0.117529
0	0.235619	0.229595
0	-2.29381	0.2285
0	-0.87831	-0.159754
0	0.525853	0.209215
0	0.49841	0.328655
0	-1.41792	-0.445116
0	-0.911248	0.0441543
0	0.529176	-0.668782
0	0.765501	0.0276163
0	-0.00146721	-0.132801
0	2.11056	0.0932782
0	-2.5646	-0.371748
0	-0.0794194	0.279913
0	-3.2369	-0.0464808
0	0.411877	-0.0622399
0	1.84607	0.42609
0	-0.0302518	-0.283675
0	0.378129	0.129377
0	0.332073	0.151194
0	0.12114	-0.0869001
0	-1.17793	0.155037
0	-1.33204	-0.237675
0	-1.47766	-0.199896
0	-0.00301009	-0.663219
0	0.324928	0.405969
0	0.764451	0.693177
0	-0.495925	-0.0500603
0	-0.207116	-0.113628
0	-0.405079	0.346322
0	-0.461663	-0.673866
0	1.57699	-0.0530841
0	-0.236357	-0.152565
0	0.92364	-0.371514
0	0.686506	0.046931
0	-0.2359	0.461757
0	0.749275	0.457434
0	-1.31962	-0.411672
0	-0.452525	-0.515298
0	-0.938473	-0.0186684
0	0.126708	-0.485343
0	0.159357	-0.219389
0	0.0372169	0.421653
0	1.42719	0.198436
0	-0.246994	-0.0647296
0	-0.522305	0.373468
0	0.03936	-0.745704
0	-0.85445	-0.116048
0	1.00828	0.0609166
0	0.335067	0.146327
0	-1.57834	0.0340649
0	-0.162501	0.0174252
0	0.850567	0.597665
0	1.25464	0.273313
0	-0.149438	0.101992
0	0.450603	0.0144767
0	0.314394	-0.0125682
0	1.05665	0.219966
0	-0.494857	-0.23822
0	-1.74827	-0.768353
0	0.545243	0.233381
0	-0.0447307	-0.0592146
0	0.377882	-0.428182
0	0.21449	0.437184
0	0.0040479	-0.319405
0	-1.32229	-0.356794
0	-0.342439	-0.0219261
0	0.41161	0.0541642
0	0.482228	0.443698
0	0.581372	0.633046
0	-1.13193	0.18076
0	1.08153	0.326039
0	1.13467	-0.102697
0	0.351533	0.0497593
0	0.779537	0.21245
0	0.336305	0.189316
0	-1.63534	-0.614157
0	-0.341303	-0.0841121
0	-0.0671291	-0.458433
0	-0.0200237	0.205555
0	0.158596	0.22541
0	-1.69348	0.313185
0	-0.651945	0.172299
0	0.474267	-0.152925
0	0.11653	-0.374681
0	0.230494	0.22945
0	0.202652	-0.0852482
0	0.16063	-0.162805
0	-0.871415	0.34425
0	-0.591925	-0.162816
0	0.667456	0.293412
0	-0.323627	-0.144984
0	-0.428615	-0.335423
0	0.132588	-0.664884
0	2.14868	0.337297
0	1.42511	-0.118018
0	1.21752	0.228252
0	1.95267	0.774611
0	1.07819	0.419661
0	1.59102	0.380348
0	1.32133	0.505563
0	0.688955	0.10874
0	-0.326557	0.726282
0	0.654185	-0.593911
0	0.495841	0.134629
0	-0.90953	-0.231659
0	0.358653	-0.273483
0	-0.483723	-0.311683
0	-1.97435	-0.108068
0	-1.71018	-0.0318106
0	0.537972	0.375086
0	0.483642	0.151224
0	0.465512	0.294987
0	0.30344	-0.000597518
0	1.28515	0.255096
0	0.631846	0.188067
0	1.29855	0.488272
0	0.675392	0.35905
0	-1.20265	0.0450099
0	0.507169	0.136185
0	-1.148	0.105024
0	-0.960145	-0.158986
0	-1.09194	0.465017
0	0.843112	0.654982
0	-0.310664	0.614963
0	0.787085	-0.224754
0	-1.47112	-0.42404
0	-0.339806	-0.614765
0	-0.132879	-0.156775
0	-1.07681	-0.291375
0	-0.19594	-0.24796
0	-1.54269	-0.380909
0	0.0860348	-0.428433
0	-0.00516308	0.109815
0	0.938881	0.241952
0	0.615656	0.210547
0	-0.515747	0.593309
0	1.44979	-0.554348
0	0.2486	-0.0632689
0	-2.60498	-0.458268
0	0.896442	0.238734
0	0.489272	-0.0135532
0	-0.655811	-0.242915
0	-0.62975	-0.964648
0	-0.763126	0.327956
0	-1.41798	0.0282844
0	-0.537513	0.150344
0	1.14337	0.348415
0	-0.954883	0.253348
0	0.767047	-0.114344
0	-0.301209	0.214909
0	0.652798	0.723501
0	-0.704364	-0.33336
0	0.835559	0.112007
0	-0.172835	-0.331226
0	0.224913	0.473936
0	-0.188778	0.266411
0	0.180285	0.0469773
0	-1.3185	-0.104016
0	0.406177	0.415561
0	0.920314	-0.0119186
0	-1.69843	-0.858116
0	-1.40888	-0.275642
0	0.266995	0.566871
0	1.15272	-0.0858244
0	-0.00334125	0.269599
0	1.35611	-0.225573
0	0.627677	-0.459361
0	0.590717	0.714172
0	0.248499	0.723129
0	0.246378	0.692573
0	-2.54914	-0.69654
0	-2.41041	-0.356737
0	0.0677309	0.233908
0	-1.3859	0.322847
0	-0.303321	-0.241006
0	-1.99194	-0.456305
0	-1.75033	-0.97449
0	0.421329	-0.241558
0	0.267583	0.446237
0	-0.944183	0.392437
0	0.586202	0.133484
0	-2.53996	-0.119575
0	1.26016	0.112135
0	1.77703	0.139213
0	0.0645468	0.15113
0	-0.612106	0.329449
0	-0.284555	0.379759
0	-0.95585	-0.134981
0	-1.10427	0.0745324
0	0.125097	0.374047
0	-0.501633	-0.111668
0	-2.23937	0.506407
0	-0.372978	-0.443862
0	-0.119962	0.253464
0	-1.93885	-0.119808
0	0.233968	0.449701
0	0.436295	-0.176143
0	-0.592136	-0.38126
0	-0.644666	-0.0120213
0	1.23451	0.725031
0	0.416567	0.172912
0	1.00646	0.276538
0	0.707234	0.464756
0	-0.921095	-0.0510061
0	1.45733	-0.134774
0	-1.29848	0.297834
0	-0.557503	0.283592
0	-0.645293	-0.687035
0	1.78274	0.230012
0	-1.6426	-0.683372
0	-0.753317	-0.547848
0	-0.784877	0.327846
0	0.28629	-0.0469205
0	-0.868213	-0.704628
0	-0.70059	0.2221
0	-1.56908	-0.0622876
0	1.04768	0.14613
0	-1.05376	-0.372535
0	2.18139	0.411972
0	1.529	0.524079
0	-1.53589	0.102285
0	-0.0621092	0.170333
0	-0.853734	-0.0395212
0	0.448029	0.110434
0	2.25966	0.292521
0	-0.77086	-0.417069
0	2.03975	0.572094
0	0.73365	0.107723
0	0.499794	0.41039
0	1.13137	0.169646
0	-0.798002	-0.499019
0	-0.390602	-0.185612
0	1.12148	0.107875
0	0.0740489	0.356098
0	-1.03659	-0.00798404
0	0.0993894	-0.257551
0	-0.627055	0.155011
0	0.172169	0.0902543
0	1.16645	-0.0373394
0	0.682259	0.304
0	-0.611567	-0.101366
0	1.98389	0.543637
0	-0.160038	0.163466
0	-1.07092	-0.44981
0	-0.320165	-0.544745
0	-0.719216	0.391657
0	0.194405	-0.296584
0	-2.65775	-0.0311058
0	-0.0779216	0.210591
0	0.790087	0.0444891
0	-1.79775	-0.0361243
0	0.889472	0.403424
0	-0.382473	0.311666
0	-0.856212	0.494837
0	-0.214747	-0.183916
0	0.339121	-0.0709311
0	0.35466	0.416955
0	0.912213	-0.0510485
0	-1.01611	-0.833116
0	0.63724	0.451716
0	0.0101357	-0.130492
0	0.237309	0.0659315
0	-0.251588	-0.721463
0	2.32727	0.0358892
0	1.12493	-0.276552
0	0.133543	-0.592562
0	0.210703	0.0192641
0	-0.610523	0.170972
0	0.00326117	0.25932
0	0.694033	0.076071
0	-0.927574	-0.482847
0	-1.70787	-0.728654
0	-1.27344	-0.23264
0	0.224286	0.128443
0	0.226482	0.319404
0	1.02868	-0.176353
0	-0.532836	-0.119228
0	-0.283839	-0.449754
0	0.259045	-0.278192
0	0.00291234	-0.184915
0	0.226923	0.158522
0	-0.794527	-0.118624
0	-0.952415	-0.203584
0	-0.638737	0.387397
0	-1.89265	-0.0503705
0	-0.413896	0.0777338
0	-1.08921	-0.647325
0	0.270629	0.140397
0	-1.64114	-0.405807
0	1.08713	0.0622216
0	1.54363	-0.0332149
0	1.7291	0.127835
0	0.499587	0.276054
0	-1.35397	-0.187314
0	-1.2422	0.279516
0	0.553248	0.0693134
0	0.901918	0.226389
0	0.110464	0.0809592
0	0.650534	0.467815
0	-0.638143	-0.155116
0	0.13133	-0.141595
0	0.315914	0.12246
0	-1.64655	0.246265
0	1.36908	-0.218764
0	-0.0188609	0.249598
0	-1.99376	-0.251684
0	-1.61872	0.0946742
0	0.306444	0.0157567
0	0.326496	-0.514747
0	-0.962698	-0.0165048
0	0.34337	0.182983
0	-0.624575	0.374638
0	0.29385	-0.1359
0	-0.643529	0.0950211
0	-0.940435	-0.188657
0	1.15226	-0.00905584
0	0.52826	0.0394161
0	-0.962906	-0.0704467
0	-1.0628	-0.42037
0	-0.301727	-0.404774
0	1.3001	-0.223109
0	0.787158	0.443363
0	-0.197789	0.390768
0	0.142321	-0.206391
0	0.123669	0.241974
0	-0.795723	0.168526
0	-0.312016	-0.352874
0	1.71304	0.496089
0	-0.755096	0.0694445
0	-1.23939	0.222524
0	1.04013	0.430461
0	-0.543591	-0.264037
0	-0.380454	0.225827
0	0.791452	0.707212
0	-0.911983	-0.223862
0	0.512375	-0.135669
0	2.31374	0.204772
0	0.363811	0.0188741
0	-0.0311405	-0.839305
0	-0.815647	0.120048
0	0.0547595	0.0253423
0	-1.25408	-0.3598
0	1.18052	-0.0336027
0	-0.280214	-0.27721
0	1.42156	0.427426
0	-0.837628	-0.550151
0	0.540928	0.357007
0	-0.05009	-0.770213
0	0.109203	0.492651
0	0.722059	-0.379808
0	1.32075	0.406743
0	1.43931	0.116418
0	0.0759138	-0.0158387
0	-1.81979	-0.246049
0	0.0644749	0.017742
0	1.33936	0.128377
0	0.458819	-0.223529
0	1.48952	-0.221816
0	1.2041	-0.0669529
0	0.110426	0.347492
0	-0.0882445	-0.444907
0	0.488936	0.248264
0	-0.183121	0.184615
0	-1.02453	-0.420055
0	0.623181	0.415145
0	-0.74098	0.00126333
0	0.373951	-0.134934
0	-1.57213	-0.595541
0	-0.236836	0.377017
0	1.30594	0.264605
0	1.34111	0.335093
0	-1.21715	0.252338
0	-0.602175	-0.130125
0	0.0233016	-0.562541
0	-0.367647	0.250576
0	-0.0400194	0.0405763
0	-0.539841	-0.799687
0	0.288707	0.534016
0	0.215911	-0.351985
0	0.0344995	-0.776665
0	-1.46453	-0.19942
0	0.812055	-0.618167
0	0.758325	-0.532866
0	0.795253	0.0213946
0	-1.06225	-0.176046
0	0.398289	-0.0234744
0	0.775085	0.0614984
0	-1.20658	-0.420926
0	-0.535434	0.177785
0	-1.40766	0.047203
0	-0.0248898	0.486301
0	-0.781674	-0.752741
0	1.89585	0.140245
0	-0.0131285	-0.375082
0	-0.678117	-0.891163
0	-0.588566	0.0283895
0	0.890773	0.356499
0	-0.0791179	-0.28277
0	0.784038	0.479132
0	0.130981	0.49257
0	1.06181	0.0468784
0	1.4848	-0.162376
0	0.541562	0.0447607
0	-0.66211	0.421439
0	1.28777	0.427862
0	0.746368	-0.4715
0	-2.16616	-0.372603
0	-0.661693	0.383844
0	-0.196772	0.231907
0	-1.13946	0.22807
0	0.0603091	-0.39722
0	0.529427	0.0104592
0	0.674272	0.597592
0	0.0864813	0.407123
0	0.127841	-0.25715
0	0.283387	-0.0614773
0	0.598246	-0.209381
0	-1.01018	-0.76868
0	0.105003	0.217917
0	0.885693	-0.0267593
0	-0.303549	-0.867821
0	-0.899066	0.0976803
0	0.321724	0.0683276
0	0.190523	0.29384
0	-0.535551	0.0199083
0	-1.00114	-0.155781
0	1.38662	0.525899
0	-0.636954	0.0576939
0	0.276476	-0.0620146
0	1.07249	0.117624
0	0.0548666	-0.45027
0	-0.0912788	0.492576
0	1.8001	0.00690043
0	0.781733	-0.0854572
0	0.525726	0.170934
0	-1.0038	0.225728
0	-0.228136	-0.187313
0	-1.31837	-0.336084
0	0.236639	-0.521623
0	0.143938	-0.00833995
0	0.0456531	-0.268228
0	-0.745006	0.344601
0	-0.0952939	0.494471
0	-0.175752	0.134492
0	0.441581	-0.441647
0	1.99651	0.286157
0	1.41418	0.0980339
0	0.59267	-0.135537
0	-0.668697	0.18616
0	0.729852	0.314542
0	-0.865675	0.0915687
0	-0.708596	0.386936
0	-0.66911	-0.170007
0	-0.0443799	0.104377
0	-0.307043	0.219911
0	-0.225748	0.118673
0	0.967739	0.226452
0	0.741083	0.388398
0	0.393395	0.356659
0	-0.752825	0.460733
0	-0.319561	-0.470865
0	-0.472338	0.357514
0	-0.421197	-0.154393
0	-0.671111	-0.580928
0	-0.268352	0.243026
0	-1.59641	-0.230397
0	0.86872	0.652826
0	-0.43069	0.0254431
0	-0.753436	0.194145
0	-2.55717	-0.578909
0	0.876519	-0.266341
0	-0.160474	0.660592
0	-0.52776	0.155906
0	-0.626617	0.189657
0	0.758692	0.187626
0	-0.291797	0.30036
0	0.186305	-0.212444
0	1.67747	0.129123
0	0.4676	0.192512
0	0.686217	0.197526
0	1.41634	0.629347
0	0.283303	-0.272495
0	0.23402	0.125687
0	1.65665	0.187922
0	0.639322	0.40755
0	0.475097	0.410466
0	-0.0473539	-0.48132
0	-2.29271	-0.299071
0	-1.02484	-0.145934
0	-1.9166	-0.596299
0	-1.5881	-0.115995
0	0.304335	-0.628329
0	-0.168997	0.406653
0	-0.550699	-0.581555
0	-0.889966	-0.482158
0	0.111576	-0.285372
0	-1.39277	-0.675602
0	-0.857612	0.0493648
0	1.44577	0.0099768
0	-0.63386	-0.0665106
0	-0.0812236	0.179605
0	0.989571	0.297658
0	-1.0423	-0.176051
0	-0.0257265	-0.676334
0	-1.22766	-0.824062
0	0.108048	0.556042
0	-1.56123	-0.247704
0	-1.79717	-0.0776768
0	-0.377359	0.647465
0	1.66786	-0.0421342
0	-2.77664	-0.869895
0	1.03002	0.202127
0	-0.14042	-0.0910596
0	-1.94907	0.387695
0	-1.21212	0.207637
0	0.0859824	0.0842393
0	-1.12167	0.474746
0	-0.785083	0.229321
0	-0.684288	-0.171636
0	1.42065	0.63229
0	0.900553	0.226722
0	1.34482	0.246935
0	0.620024	0.646174
0	0.468421	-0.326242
0	0.488237	0.551345
0	1.05583	0.350902
0	1.28656	0.252979
0	-1.48745	0.420039
0	-0.408446	-0.228732
0	-0.307017	0.0241952
0	0.782037	-0.129374
0	-0.755254	0.0686631
0	0.568301	0.387063
0	0.699842	0.558709
0	-0.34018	0.250328
0	0.0991174	-0.360138
0	0.684987	-0.0748221
0	0.47321	0.0100338
0	-0.713432	-0.165072
0	-0.186926	-0.234787
0	0.345198	-0.229496
0	0.833255	0.474679
0	0.730621	0.122819
0	-0.0641978	-0.177853
0	0.260276	0.309263
0	-0.764065	-0.323069
0	0.514943	0.118802
0	0.0118306	0.655011
0	-0.51559	0.251927
0	-2.73357	-0.359961
0	-0.785116	-0.578781
0	0.723939	0.392089
0	-0.323076	-0.0897906
0	-0.336987	-0.473443
0	-1.58644	0.353407
0	0.489743	-0.071258
0	0.0637157	-0.497924
0	0.493825	0.168485
0	0.191926	0.303814
0	-1.08746	0.0107946
0	-0.146134	-0.262355
0	0.241762	-0.283963
0	-1.0484	0.212356
0	0.948724	0.276889
0	0.446615	0.512706
0	-0.328977	0.0816853
0	-0.0229686	0.0659456
0	0.656541	-0.19219
0	1.07108	0.0883675
0	-0.310975	0.216316
0	-0.276791	-0.237871
0	1.52296	0.336536
0	-0.337663	0.0217432
0	1.39202	0.0145645
0	-0.737635	-0.143144
0	1.76989	0.372779
0	-0.105324	0.180146
0	0.78478	0.292917
0	0.34411	0.317624
0	-0.263642	0.198915
0	-0.499172	-0.198238
0	-1.00882	-0.0701807
0	-1.17957	-0.439035
0	1.96159	0.0846064
0	0.273541	0.559865
0	-0.509868	0.0952814
0	0.726679	0.19595
0	-0.0129387	-0.314376
0	-0.593967	0.12063
0	-1.93603	-0.282273
0	-0.23187	0.653399
0	2.34299	0.19938
0	-0.603515	-0.32697
0	1.02791	0.479483
0	1.04428	0.0773973
0	0.301024	0.212296
0	-0.321998	-0.569572
0	1.26579	0.192252
0	-0.958138	-0.0218786
0	0.646188	0.29247
0	1.26236	0.471344
0	-0.713762	-0.30571
0	1.84968	0.463993
0	0.784888	-0.308131
0	0.274282	0.134743
0	-1.7055	0.179518
0	0.389908	0.271506
0	-1.48475	-0.208473
0	0.256853	-0.394379
0	1.09764	0.224073
0	0.513462	0.027267
0	-0.40679	-0.09461
0	-0.158245	-0.144076
0	1.19744	0.421949
0	-1.13444	-0.199725
0	0.454705	0.373449
0	0.514759	0.516788
0	-0.231472	-0.328071
0	-0.7003	-0.435753
0	1.11036	0.155519
0	-0.193594	0.00176629
0	-0.0327308	0.217239
0	1.96117	0.233229
0	-0.266001	-0.29299
0	-1.95865	-0.299054
0	1.34005	0.158969
0	-0.589559	-0.043693
0	-1.37294	-0.656394
0	-0.382244	-0.122047
0	-0.231833	-0.884974
0	1.44479	-0.048049
0	1.96472	0.559479
0	0.646811	0.586959
0	-0.389569	0.153561
0	1.8409	0.130611
0	-0.0992705	0.0257827
0	1.42101	-0.177561
0	-2.01072	-0.667163
0	0.211154	0.165198
0	0.812545	-0.113807
0	-0.245059	-0.444623
0	-1.23432	0.247055
0	0.183115	-0.0943185
0	2.45032	0.414818
0	-0.605397	0.475746
0	0.560799	0.287121
0	-1.51018	-0.95493
0	-0.473825	-0.449764
0	-0.049716	-0.129488
0	-0.978216	0.40668
0	-1.29188	-0.657272
0	-1.34356	0.082736
0	-0.925364	-0.63941
0	0.540788	0.0114342
0	0.151417	0.56039
0	-0.205426	0.312386
0	1.07123	0.567184
0	1.04455	-0.404865
0	-1.94824	-0.211337
0	-0.24817	0.371858
0	0.413869	0.00517119
0	-1.32596	-0.517996
0	0.212194	-0.0664442
0	-0.279145	0.455967
0	-0.671682	0.0622011
0	0.709813	-0.374801
0	0.773098	-0.0969164
0	-0.229174	-0.740199
0	0.318417	0.248584
0	0.774366	0.12647
0	1.92651	0.480921
0	-1.73738	-0.23414
0	0.126685	-0.115758
0	0.178492	-0.571222
0	0.0374094	0.393239
0	-1.23985	0.0917112
0	-0.6588	-6.96328e-05
0	0.486153	-0.530465
0	1.71942	0.663305
0	1.27897	0.474066
0	-0.0587036	0.199191
0	-2.03107	0.505951
0	0.79365	-0.222752
0	-0.685031	-0.404101
0	-0.0428326	-0.263229
0	-0.954191	-0.034988
0	0.407258	-0.0779529
0	-0.709841	-0.0976707
0	0.420384	0.254579
0	-0.364301	0.312474
0	1.42289	0.35439
0	-1.89151	-0.508967
0	0.475844	-0.524113
0	0.978093	-0.142423
0	-0.512002	-0.378705
0	-0.261973	0.462917
0	0.391556	-0.051399
0	0.220467	0.0318387
0	-0.165449	-0.421718
0	0.593753	-0.218316
0	1.28397	0.54137
0	-0.884443	-0.334951
0	-0.46666	-0.0903973
0	-0.217856	-0.483257
0	-0.944419	-0.161562
0	-0.257458	-0.0776051
0	0.303112	-0.000736465
0	1.97187	0.373655
0	-0.417467	-0.354695
0	1.57581	-0.314877
0	0.0519005	-0.547219
0	-0.419035	-0.367725
0	-0.618261	-0.2366
0	-0.548142	0.12678
0	1.151	0.0642846
0	0.461802	0.549749
0	1.23848	0.726236
0	-0.900206	-0.352689
0	-1.78169	-0.318261
0	-1.49144	-0.0764891
0	1.00906	0.291393
0	-0.706351	0.242014
0	-1.02725	0.265358
0	1.32187	-0.547838
0	-0.835335	-0.157933
0	-1.14603	0.0935146
0	-1.04901	0.354858
0	-0.524789	0.400825
0	0.768441	-0.0752005
0	-1.49019	-0.382521
0	0.890246	-0.0358425
0	-0.158461	0.40921
0	0.501285	-0.71199
0	0.0641273	0.233534
0	0.300325	-0.586864
0	-0.976466	-0.627006
0	1.35777	-0.0616535
0	-0.38584	-0.094281
0	1.77863	-0.446211
0	-0.955229	-0.0985428
0	0.247883	0.188897
0	1.0423	0.229985
0	0.0818342	-0.103175
0	-0.454548	0.281327
0	0.206744	0.0241214
0	-0.31187	-0.464581
0	0.567709	0.517232
0	-1.14062	0.379737
0	-0.397764	0.127904
0	-0.207264	-0.208198
0	0.60594	0.288174
0	0.10387	-0.342747
0	0.199364	-0.321306
0	0.293689	0.0532987
0	-0.86241	0.279448
0	0.830377	0.386463
0	-0.320028	0.352301
0	0.868771	0.250309
0	1.17541	-0.291447
0	-0.714076	-0.699555
0	0.64621	0.381646
0	0.0856	-0.216587
0	0.450767	-0.0355466
0	-0.0526368	-0.542445
0	0.0513663	0.0237491
0	-1.20936	0.141957
0	-0.199564	0.378846
0	0.00759024	-0.198055
0	0.722093	0.0968119
0	-0.696273	0.0403858
0	-0.798746	0.308955
0	0.553708	0.377523
0	1.15074	0.119653
0	-0.260544	0.246504
0	1.12129	-0.437588
0	1.14361	0.189329
0	-3.0127	-0.237258
0	0.311523	0.0672502
0	-0.809432	-0.50664
0	-1.05797	-0.674556
0	0.750389	0.458632
0	-0.302136	-0.491142
0	0.549107	0.277879
0	0.183046	0.568599
0	-0.753024	0.11099
0	-0.995587	-0.531416
0	-1.63489	0.68665
0	0.440279	-0.600921
0	-0.821021	-0.146235
0	-0.22645	0.066367
0	0.231273	-0.584236
0	-1.3481	-0.800544
0	0.184228	0.395775
0	-1.16728	-0.499448
0	-0.654153	-0.206621
0	-0.294458	-0.368791
0	2.26478	0.476419
0	0.218335	0.389837
0	-0.333857	-0.208434
0	0.177916	0.0701895
0	-0.36923	0.575734
0	0.434881	-0.395264
0	0.527205	0.0770169
0	0.714856	-0.128434
0	2.49167	0.327085
0	0.194942	-0.268868
0	-1.08536	-0.620291
0	-1.72651	-0.224981
0	0.361273	-0.175075
0	0.230492	0.256918
0	0.542893	-0.235285
0	1.05911	0.331595
0	1.44683	0.731231
0	-0.684114	0.251611
0	-0.299099	-0.644946
0	0.129033	0.272136
0	0.411692	0.322466
0	-0.792297	-0.488663
0	0.607855	0.0878185
0	-0.890976	0.145605
0	0.876576	0.147857
0	2.78886	0.496512
0	1.5377	0.302754
0	-0.784359	0.355509
0	0.0244184	0.112957
0	0.271878	0.0279296
0	-1.13106	-0.387243
0	-0.154837	-0.24764
0	0.786565	0.175066
0	-0.305325	0.322274
0	2.97945	0.208893
0	-0.570118	-0.229361
0	-0.519375	-0.45201
0	0.85842	0.380519
0	1.26507	0.137845
0	-0.623987	0.225238
0	-0.393345	-0.291383
0	-1.72372	-0.0800495
0	-2.47502	-0.0139592
0	0.0346923	0.60544
0	-2.43271	-0.075212
0	0.137829	-0.350765
0	2.02801	0.42168
0	-0.168157	-0.502187
0	0.0350836	0.129719
0	1.17469	-0.235868
0	0.600029	-0.412151
0	0.5672	0.549239
0	0.315483	0.12829
0	0.933862	0.0151524
0	0.104472	-0.409599
0	-3.3128	-0.52448
0	-0.87889	-0.809237
0	-1.48379	-0.176757
0	0.552876	0.180326
0	0.362334	0.0201505
0	-0.850179	-0.457103
0	-0.226306	0.0287286
0	1.11682	0.191838
0	1.50529	0.345867
0	-0.75405	0.329992
0	0.670583	0.387034
0	0.369538	0.154263
0	0.338603	0.341985
0	1.21881	0.220733
0	0.00623007	-0.00103676
0	0.742772	0.246696
0	0.890291	0.0405199
0	0.863799	0.305671
0	0.572441	0.246087
0	-0.0522048	0.139656
0	-0.958623	-0.108668
0	1.57437	0.675059
0	0.0252935	-0.00867785
0	1.15984	0.452632
0	-1.30385	0.282074
0	0.970266	-0.418753
0	-0.0925348	0.412038
0	-1.07515	-0.312037
0	1.64892	0.0718903
0	-0.359677	0.131556
0	-1.42952	-0.193349
0	0.779521	0.327001
0	0.27984	0.152016
0	-0.783089	-0.0804164
0	-1.56915	-0.135337
0	-0.772174	0.328637
0	1.43432	-0.0893511
0	0.744691	0.261997
0	-0.614706	0.00996104
0	-1.40408	0.0692597
0	0.6012	0.528079
0	0.657171	0.295344
0	-2.32821	0.185539
0	0.150409	0.484991
0	-0.626153	-0.0220024
0	-0.746603	0.283525
0	-1.14267	0.30921
0	-0.348068	0.0749976
0	0.825992	-0.213222
0	1.73705	-0.0782246
0	0.0124641	0.142898
0	0.682205	0.755525
0	-0.763562	-0.174782
0	-0.914043	0.0483025
0	0.755153	0.466526
0	-0.159568	-0.108928
0	-0.248342	0.309501
0	-0.136474	-0.650774
0	2.15836	-0.165516
0	1.24016	0.236447
0	0.0953849	0.393471
0	1.23169	-0.727001
0	0.34187	-0.170356
0	-1.75182	-0.193951
0	0.286282	0.22927
0	-1.33402	-0.480411
0	-0.392578	0.272398
0	-0.141164	0.182895
0	1.37599	0.540111
0	-0.490516	0.165218
0	-0.272915	-0.0815209
0	-0.209224	0.222743
0	-0.601978	-0.160733
0	-0.0885006	-0.019351
0	-1.05271	0.0664883
0	0.0855604	0.2952
0	-0.220935	-0.386122
0	-0.654343	0.19701
0	-0.739147	0.17167
0	0.405882	0.247883
0	0.0407382	-0.418439
0	0.634127	0.266698
0	-0.211966	-0.468537
0	-0.0241919	-0.34259
0	0.139542	0.302743
0	0.394329	-0.0789372
0	1.01474	-0.170286
0	0.367924	0.36321
0	-1.67197	0.15081
0	-0.904384	-0.107696
0	-1.04341	-0.0736992
0	0.803422	0.264948
0	1.4659	0.0202378
0	-1.64386	-0.509777
0	-0.489297	-0.5715
0	0.933114	-0.306021
0	-0.440142	-0.649297
0	-0.23687	0.302858
0	1.61122	0.0810852
0	0.203424	0.214435
0	-0.170624	-0.244875
0	-1.18005	-0.163514
0	-1.66803	-0.135226
0	0.56714	0.379077
0	-0.251768	-0.116706
0	-1.26572	-0.299952
0	-0.684565	-0.214325
0	-1.20827	-0.350747
0	0.998063	-0.037406
0	-0.85984	-0.779397
0	-0.129122	-0.00641057
0	-0.083194	-0.160533
0	0.867027	0.0399847
0	1.80575	0.272766
0	-0.2222	-0.123761
0	-0.105526	-0.121685
0	1.65432	0.617479
0	0.0823752	0.340724
0	0.675564	0.434626
0	0.668524	0.421836
0	-0.486839	0.221836
0	-0.545713	-0.192255
0	0.30544	-0.503187
0	-0.414414	0.348299
0	0.204498	-0.678548
0	-1.13817	0.170381
0	0.590219	0.282078
0	0.674128	0.0382206
0	3.20311	0.263921
0	1.45833	0.235835
0	1.50249	-0.0893589
0	-1.20222	-0.172947
0	-0.799701	0.359251
0	-0.579434	-0.290385
0	1.62827	0.294197
0	0.962366	-0.0496239
0	0.548731	0.0163104
0	-1.49855	-0.371824
0	0.283688	-0.421203
0	1.14558	-0.264715
0	0.203502	0.331113
0	-0.272085	-0.334277
0	-0.744365	-0.111201
0	0.890147	-0.305606
0	-1.53092	-0.718065
0	-0.400323	0.338168
0	-0.321132	0.0166749
0	0.469674	-0.215401
0	1.06794	-0.389046
0	-1.45523	0.20266
0	-1.21198	-0.355985
0	0.3915	0.18829
0	-0.996364	-0.330274
0	0.285288	-0.0532833
0	-2.16656	0.312903
0	0.115903	0.165063
0	-1.50203	-0.696533
0	-0.158001	0.0811727
0	-1.42769	-0.155432
0	-0.74671	0.156399
0	-0.70939	0.170379
0	-0.173149	-0.059901
0	-0.0326863	-0.0149181
0	-0.0921219	0.336266
0	0.115743	0.341907
0	0.703598	0.24076
0	-0.559091	-0.0654681
0	-0.18448	-0.468436
0	0.686607	0.194931
0	-0.776701	-0.773496
0	1.3268	0.445785
0	0.65113	-0.407471
0	-0.221315	-0.456502
0	-0.84519	-0.39758
0	0.419686	-0.0514743
0	-1.53549	-0.585546
0	0.764901	0.266573
0	0.637771	0.0711481
0	0.0222153	-0.276212
0	-0.643453	-0.221936
0	-0.707223	0.179331
0	0.11387	0.460095
0	0.786334	-0.0607771
0	0.508196	-0.0735224
0	0.662185	-0.00144161
0	0.751146	0.656604
0	-0.977871	-0.581983
0	0.221024	0.41579
0	-0.900626	0.119896
0	-0.723622	-0.0944271
0	-0.560602	0.32176
0	-2.25673	-0.395621
0	-0.151643	-0.144064
0	-1.28629	-0.522266
0	0.510365	-0.0863197
0	-0.229837	0.402402
0	-1.39931	-0.699662
0	0.255098	-0.122373
0	0.686131	0.402154
0	0.100777	0.0808329
0	0.717591	-0.360486
0	-1.80719	-0.909643
0	-1.09205	0.173405
0	0.605662	-0.077217
0	0.330099	0.38636
0	-0.650059	-0.507107
0	-0.447654	0.0311616
0	1.37412	0.231923
0	-0.788617	0.210209
0	-0.175917	-0.274802
0	0.664873	0.307132
0	0.262851	-0.0448486
0	0.405447	-0.164855
0	2.15431	0.582774
0	-0.425493	0.191211
0	0.85098	-0.0288816
0	-0.534288	-0.103633
0	-0.129253	0.475697
0	1.95115	0.0608279
0	0.492723	0.15469
0	0.75683	0.250212
0	1.51277	0.143968
0	0.193885	-0.241428
0	0.763484	0.0583536
0	-0.238844	0.362279
0	-0.511631	0.235871
0	0.217245	-0.289556
0	0.347229	0.517552
0	-0.878855	-0.0293526
0	0.42275	-0.00276746
0	0.662659	-0.100048
0	-0.467855	-0.130986
0	-0.943246	0.566174
0	-1.21427	-0.769424
0	-0.667537	0.00220325
0	-1.61989	0.640891
0	0.158609	-0.417203
0	0.0688548	-0.258782
0	0.647285	-0.0701473
0	0.424017	0.0644222
0	-0.785096	0.327286
0	0.182846	-0.145489
0	-1.88052	-0.298976
0	0.602776	0.235368
0	0.0311458	0.12669
0	1.01494	0.339355
0	0.79014	0.343942
0	-1.37991	0.241701
0	-0.0729184	-0.360404
0	-0.175351	0.0436733
0	-0.382487	0.213929
0	-2.1882	-0.233992
0	0.144008	0.533619
0	-0.853996	0.157201
0	0.423882	0.342313
0	-0.138714	-0.337616
0	-0.181523	0.181789
0	-2.45235	-0.474899
0	0.973101	0.272297
0	0.284353	0.305669
0	-0.557293	0.354812
0	0.921841	-0.212794
0	-0.679401	0.0239125
0	0.915204	-0.119816
0	-0.585011	0.0829086
0	-1.7055	-0.0838367
0	0.257028	0.27001
0	0.149249	0.0477386
0	1.20606	0.0491893
0	0.35197	-0.14236
0	0.447374	0.206522
0	0.418794	-0.402795
0	0.874167	0.110101
0	-0.0644881	0.174694
0	2.09118	0.215863
0	-0.106571	-0.0128362
0	0.832299	-0.166565
0	0.336026	-0.55732
0	-1.91953	-0.0727855
0	-1.46848	-0.00560399
0	0.8197	0.260941
0	-0.550463	0.219856
0	-0.353682	0.1683
0	-0.882295	-0.102104
0	-2.55669	0.129041
0	0.424627	0.163729
0	0.698242	0.225709
0	-0.548199	0.027248
0	-0.782274	0.0136961
0	-1.28725	-0.415933
0	-0.122629	0.312362
0	-0.266314	-0.049752
0	-0.112015	-0.189143
0	0.585787	0.25011
0	-0.872791	-0.70452
0	-1.98526	0.268623
0	-0.447573	-0.0232535
0	2.42114	0.351512
0	-1.08219	0.0384313
0	0.798376	-0.105796
0	1.68906	0.441483
0	0.186079	0.456204
0	-1.08598	0.198076
0	-0.805169	0.33695
0	-0.0778837	0.358399
0	-1.0629	0.194482
0	-0.0575625	0.329198
0	1.77024	-0.512474
0	1.28049	0.388727
0	-0.706608	0.0492754
0	0.627948	-0.195512
0	-0.372172	0.423179
0	0.973299	0.668151
0	0.808385	-0.22037
0	-1.92683	0.282244
0	0.213043	-0.0489207
0	-0.117524	-0.0528109
0	0.289724	0.449486
0	0.232886	0.705196
0	0.322166	-0.440967
0	1.21845	0.129602
0	2.08627	0.237548
0	0.872627	0.377032
0	0.607788	-0.0905802
0	-0.742732	-0.465138
0	-0.752976	-0.0290085
0	-2.01625	0.198843
0	-0.133789	0.441812
0	0.506969	-0.610206
0	0.546393	-0.18219
0	-0.143165	-0.487818
0	-0.315413	-0.310974
0	-0.700712	0.15451
0	-0.770856	-0.272774
0	-0.835177	-0.120452
0	1.61622	0.477208
0	0.354127	0.269099
0	0.738332	0.245866
0	-0.660583	-0.357791
0	0.501436	0.353106
0	0.459135	0.291381
0	-0.634126	-0.118942
0	0.25254	-0.114488
0	0.537111	-0.57423
0	-0.746005	-0.316941
0	-0.360845	0.253872
0	-0.0857596	-0.201202
0	-0.124829	-0.315062
0	-0.648002	-0.349806
0	-0.338302	0.220695
0	0.478514	0.609147
0	0.0201014	-0.45106
0	1.04386	0.038968
0	-1.58483	0.273463
0	-2.41182	-0.494303
0	0.41728	-0.204305
0	-0.558196	-0.306579
0	1.50825	0.519072
0	1.37083	0.280023
0	-2.16977	0.237306
0	-0.589781	0.0767764
0	0.762029	0.373188
0	-1.31141	0.135532
0	-1.12474	0.0458532
0	-1.37343	-0.100058
0	1.47025	0.197335
0	-0.379801	0.286654
0	2.03858	0.201671
0	-0.648484	0.432981
0	0.364911	0.47729
0	-2.13452	0.316684
0	-0.67957	0.444169
0	-1.88536	-0.194592
0	-0.327453	0.325025
0	-0.686533	0.0723366
0	-0.594995	-0.619788
0	-0.501185	0.0757842
0	-1.0904	0.396297
0	0.555109	0.263576
0	0.617534	0.250953
0	0.238402	-0.468421
0	-0.187568	0.114403
0	0.164256	0.557298
0	1.49065	0.252552
0	-0.401509	0.161412
0	1.86058	0.247992
0	-0.0627346	-0.348264
0	0.0590727	-0.187157
0	-0.625509	0.143767
0	-0.160268	0.36526
0	1.52661	0.699409
0	-0.309043	-0.454457
0	-2.40325	-0.370013
0	0.979609	0.30884
0	0.095908	-0.345482
0	-0.562378	-0.17085
0	1.43653	-0.0600917
0	0.475282	-0.299238
0	0.824516	-0.426623
0	-2.43022	-0.0207162
0	1.59204	-0.250005
0	-0.583415	-0.566011
0	-0.351037	0.356536
0	0.247148	0.215703
0	0.570034	0.381984
0	0.170114	-0.620288
0	-2.58651	-0.0669615
0	-1.32426	-0.168933
0	-0.00343479	0.220688
0	-0.146935	0.325654
0	-0.305124	-0.230657
0	0.559675	0.0635461
0	0.899699	-0.266286
0	-0.653511	0.34802
0	0.511044	-0.689272
0	-0.62271	-0.668618
0	0.568227	0.362666
0	0.184352	-0.104224
0	1.06229	0.0490192
0	0.269862	0.0158251
0	0.106202	0.364358
0	1.98957	0.296408
0	-0.326829	-0.0668837
0	0.127854	0.123993
0	-1.6565	-0.38059
0	0.955145	0.300798
0	-1.22386	-0.123553
0	-0.723431	-0.0881033
0	-0.288003	0.10659
0	1.03359	0.69755
0	1.21649	0.414717
0	0.287768	0.0412626
0	0.0704459	-0.289101
0	0.550193	0.0630223
0	-0.325014	0.300741
0	-0.626655	-0.188002
0	2.39078	0.0387842
0	0.45826	0.402962
0	1.67984	0.112594
0	0.705879	-0.00435424
0	0.0431665	0.012778
0	1.17152	-0.399606
0	-1.17164	-0.288783
0	0.311911	0.40078
0	0.524044	-0.160326
0	1.14085	0.273203
[truncated: 23,581 more rows]

## Sheet: Figure 8b
Distributions of the g-factor derived from cognitive tests via ESEM and predicted from stacked rsMRI phenotypes.
Fold	Observed g-factor	Predicted g-factor
0	-0.159159	0.28612
0	0.781368	0.415148
0	-0.241189	-0.492838
0	-1.29345	-0.406896
0	0.208778	-0.75689
0	0.972601	0.252476
0	-0.159422	-0.59308
0	-0.50243	-0.0458567
0	-1.4288	-0.479179
0	-0.451268	0.0623851
0	-2.68404	-0.957257
0	0.627661	-0.743516
0	-1.46489	-0.100902
0	0.746549	0.202579
0	0.834798	0.453999
0	1.25294	-0.525262
0	-0.492525	-0.0956657
0	0.184536	-0.282579
0	0.450038	-0.0260372
0	-0.258774	-0.722748
0	0.29831	-0.245136
0	0.747059	0.425337
0	-0.605108	-0.510959
0	-1.03691	-0.0554852
0	0.541147	0.622355
0	1.12434	0.351798
0	1.01015	-0.27527
0	-0.730925	-0.444523
0	-1.01779	-0.414059
0	1.72781	-0.426198
0	1.49539	0.210034
0	-0.407185	-0.106976
0	-1.66447	0.57349
0	-0.806	-0.220103
0	0.415411	-0.197802
0	-0.0679391	0.247078
0	-0.852658	-0.415478
0	-1.33059	0.00563963
0	0.704594	0.0806788
0	-1.65627	-0.598266
0	-1.10135	0.133066
0	0.64131	-0.314908
0	0.210491	0.370283
0	-0.0165522	-0.133158
0	-0.675535	0.511691
0	1.07727	-0.184034
0	-2.10069	-0.609416
0	1.66729	0.725553
0	-1.18185	0.245925
0	0.310977	-0.705426
0	-1.47151	-0.187277
0	0.426075	-0.0419488
0	-1.19762	-0.597707
0	1.21447	0.490871
0	0.0979468	0.423048
0	-0.293779	-0.175129
0	1.79176	0.172073
0	-0.884574	-0.524269
0	0.713233	-0.384717
0	0.926032	-0.111747
0	0.407019	-0.166968
0	0.261344	-0.603931
0	-0.517553	0.721837
0	0.920513	-0.711028
0	1.14679	-0.348608
0	0.501962	0.401481
0	-0.293463	0.577759
0	0.482107	0.317707
0	-2.27137	0.14678
0	-1.27704	-0.0696345
0	0.340813	0.426668
0	0.919909	-0.541333
0	-0.441495	-0.172272
0	-0.692885	-1.03229
0	0.768979	-0.304108
0	1.2399	0.570538
0	-1.0326	-0.407603
0	0.090195	0.439284
0	-0.222421	-0.279636
0	0.872222	-0.0423259
0	0.162038	-0.0209286
0	0.490103	0.0675512
0	0.151897	0.0304037
0	0.123999	-0.665978
0	0.0128683	0.379928
0	1.0249	0.24853
0	0.591346	-0.223353
0	-0.211908	0.757092
0	2.69297	0.389751
0	0.973411	0.297494
0	0.862319	0.323687
0	1.72745	-0.184336
0	0.552489	0.465569
0	-0.398828	0.107546
0	0.539229	0.168588
0	0.17278	0.630789
0	-0.0417902	0.711847
0	0.677665	0.44528
0	1.21767	-0.507119
0	-0.75363	-0.600773
0	-0.261833	-0.196102
0	0.124664	0.0773773
0	0.735883	0.137747
0	-0.207102	-0.854156
0	-0.330211	0.495757
0	-1.24708	-1.11363
0	1.1452	0.102562
0	1.30376	0.704319
0	-0.834932	-0.656723
0	-0.125006	-0.0919354
0	-0.125281	-0.428548
0	0.998549	0.340116
0	-0.0177519	-0.0530378
0	-1.62145	-0.155037
0	-1.15047	-0.707986
0	1.13063	0.387127
0	-0.907916	0.27862
0	-0.847193	-0.191547
0	-1.57223	-0.481413
0	-1.10867	-0.831409
0	0.52521	-0.41796
0	-0.790484	-0.185312
0	-1.30896	-0.577742
0	0.515231	0.572497
0	-1.71288	0.127635
0	0.806876	-0.122576
0	1.82188	-0.193511
0	-0.673104	-0.143981
0	0.186883	0.0631735
0	-0.407804	-1.22755
0	-0.0958433	-0.268428
0	0.0827719	-0.572931
0	-0.0113155	-0.396763
0	-0.759161	-0.109258
0	0.395056	-0.527438
0	0.143112	-0.0187533
0	0.62168	-0.767178
0	0.883652	0.227127
0	-0.763009	0.193281
0	1.14592	0.619984
0	-0.518413	-0.251478
0	-0.470537	-0.282838
0	0.159999	-0.360049
0	0.0387969	0.0837999
0	0.660523	0.331163
0	1.31461	0.164234
0	-0.846877	0.172308
0	-1.79885	-0.722611
0	-0.618773	-0.846751
0	-0.526506	-0.306461
0	0.459245	0.136589
0	-0.0625127	-0.157504
0	0.295159	0.501763
0	-1.12688	0.169251
0	-1.66229	-0.131675
0	-1.1407	0.540409
0	0.650708	-0.441116
0	-0.118116	0.0382333
0	0.0451985	-0.118703
0	0.639851	0.176448
0	0.373279	0.690139
0	0.624062	0.673434
0	0.575898	0.909246
0	-1.0069	-0.308019
0	0.563877	0.526526
0	1.21206	0.642739
0	-0.371527	-0.13826
0	-1.41296	0.146787
0	0.137689	0.0346248
0	0.376274	0.479182
0	0.490247	0.565882
0	-2.17269	-0.187064
0	-0.0712339	0.46268
0	0.732008	0.456211
0	1.73128	0.0449556
0	-0.0276999	-0.562599
0	-0.11518	-0.317408
0	-0.714698	0.562206
0	-0.0538476	0.0133515
0	-0.168686	-0.306349
0	-1.80353	-0.316053
0	0.144915	0.0465448
0	-0.348472	0.22138
0	1.36885	0.753429
0	-0.176163	0.0498459
0	0.030437	0.246071
0	0.413566	0.359496
0	0.778462	0.579133
0	1.68899	0.655002
0	0.680427	-0.539379
0	-2.17977	0.32383
0	-0.0998165	0.337341
0	1.26414	-0.146717
0	-1.04424	-0.671238
0	-1.25647	-0.794899
0	0.618184	0.255778
0	0.724679	-0.160769
0	0.644206	-0.336433
0	-0.457427	-0.0019227
0	-0.0388109	0.0506628
0	-0.15586	-0.262214
0	0.0934459	0.559485
0	-0.257982	0.335059
0	0.635835	0.330173
0	-0.131304	-0.122488
0	-0.382084	-0.239815
0	0.235108	0.527431
0	0.792728	0.769302
0	-0.184851	0.631299
0	-1.17979	0.0825642
0	0.500531	0.487792
0	0.440484	0.306938
0	-0.443421	0.366723
0	0.757705	0.333633
0	-0.415223	-0.178618
0	-0.178463	0.17991
0	-0.837752	-0.235161
0	-0.490406	0.0144436
0	-0.507975	-0.472648
0	-0.898289	0.259866
0	1.11574	0.127411
0	1.16044	-0.334156
0	0.834678	-0.329806
0	0.148016	0.387488
0	1.03122	-0.132815
0	-0.239926	0.146496
0	-0.102875	0.097975
0	-0.487878	-0.682789
0	-0.952742	0.08111
0	0.175729	0.302212
0	1.02963	0.335569
0	0.0967755	-0.311235
0	-0.236266	-0.284207
0	0.218747	0.0618589
0	0.564604	0.28094
0	0.302816	0.479122
0	0.743223	0.233801
0	0.293343	0.148369
0	-0.104667	-0.164053
0	1.50253	-0.34852
0	-0.680808	0.322914
0	0.6626	0.16657
0	0.0947841	0.153896
0	-0.0110934	-0.27482
0	-0.0818657	-0.113929
0	-1.22106	0.0830002
0	-0.452684	-0.0513267
0	1.21773	0.0842048
0	0.183398	0.0465044
0	-0.061675	0.36142
0	0.67739	-0.726438
0	1.91154	0.449144
0	-1.11998	0.0141032
0	-0.205313	-0.910386
0	-0.505161	0.0615196
0	-0.990922	0.21746
0	1.36062	0.832547
0	1.0624	0.623358
0	-0.593792	-0.0776323
0	0.239319	-0.119614
0	-0.309903	-0.137616
0	0.452705	0.276488
0	-0.204782	-0.945281
0	0.670606	1.00549
0	1.0947	0.271924
0	-0.472173	0.0919706
0	-1.61873	-0.885049
0	-2.03617	-0.125135
0	0.744712	0.316015
0	0.273552	0.332132
0	-1.3101	0.15005
0	1.98474	0.505345
0	-0.513982	0.36178
0	0.764428	0.30608
0	0.577726	0.804627
0	-2.68651	0.266593
0	1.38002	0.184077
0	0.170096	0.445137
0	1.49498	0.285603
0	0.608735	0.378563
0	-1.26123	0.67506
0	-1.19987	0.00766537
0	0.895536	-0.523662
0	0.334342	0.361134
0	0.0592895	-0.381771
0	-0.0928949	0.382897
0	0.0155591	-0.175549
0	0.252767	-0.102709
0	1.44584	0.429773
0	-0.372585	0.15461
0	0.958525	0.19431
0	-0.853872	-0.00728893
0	-0.86159	-0.105805
0	0.92366	-0.387197
0	-0.155802	0.516548
0	0.554761	0.386806
0	-0.325415	-0.759852
0	-0.0165821	0.049561
0	-1.38983	-0.554602
0	-0.0912492	0.730963
0	-0.301948	-0.608228
0	-0.599352	-0.051493
0	-0.40889	0.197357
0	-0.376592	0.205331
0	-0.470252	0.801833
0	-1.03074	0.364731
0	0.619341	-0.748142
0	0.71315	-0.0883549
0	1.66697	0.0706604
0	-1.49449	-0.365561
0	-0.399858	-0.228534
0	1.00322	0.77193
0	-1.05623	-0.0104423
0	0.818369	-0.820299
0	-0.780708	-0.703213
0	1.52103	0.541945
0	1.72814	-0.287011
0	-0.84587	-0.486377
0	-2.60222	-1.4472
0	-1.09845	0.148344
0	-0.16776	-0.282881
0	0.46437	-0.280179
0	0.284303	0.461852
0	-0.324998	-0.033257
0	0.872843	0.128273
0	0.754229	0.289753
0	-0.255717	0.175235
0	0.420635	-0.491709
0	-1.71101	-0.162207
0	-0.77266	-0.210184
0	-0.803922	-0.292906
0	-0.272983	-0.89981
0	1.27267	0.501829
0	1.87401	0.562364
0	0.505367	0.457258
0	0.451811	0.0515519
0	0.349596	0.238196
0	1.12509	-0.155928
0	1.00473	0.510551
0	0.530625	0.593091
0	1.19872	-0.173757
0	-1.27839	-0.122626
0	1.06058	-0.347665
0	-0.631497	0.537659
0	-0.584796	1.01189
0	-0.187294	0.123674
0	1.5059	0.746196
0	0.812647	0.0502743
0	1.26013	0.135527
0	-0.922955	0.18109
0	-0.905401	-0.56108
0	0.818914	0.696337
0	-1.39485	-0.722076
0	0.340349	0.00374992
0	0.356929	0.28989
0	0.959121	0.0337404
0	-1.01448	-0.16459
0	1.18068	0.668067
0	-0.685606	-0.765761
0	0.382527	0.330512
0	-1.11414	0.151892
0	-1.44859	-0.189139
0	0.680628	0.539205
0	-0.188785	0.398442
0	-1.28138	-0.318454
0	0.769289	0.353407
0	0.14742	-0.126766
0	-1.826	-0.240713
0	0.538469	-0.207296
0	-1.37097	0.0803005
0	-1.12289	-1.0803
0	-0.533477	0.0265633
0	-0.507697	0.433296
0	-0.222062	-0.162293
0	-0.748486	0.193827
0	0.751299	0.491895
0	-0.0439963	-0.269462
0	-0.458181	-0.251752
0	2.97617	0.479239
0	-0.460983	0.272956
0	-1.37777	-0.313707
0	-0.197007	0.3825
0	-0.118174	-0.427774
0	0.48199	0.0388762
0	2.08118	-0.356777
0	0.910459	0.368835
0	0.32488	-0.704099
0	0.749464	0.568169
0	0.923802	0.166307
0	-0.0218489	0.210022
0	1.68622	0.617645
0	0.538174	0.297114
0	0.38622	0.190514
0	1.89868	0.471839
0	-0.329745	0.178156
0	0.297079	-0.784369
0	0.867954	-0.0955372
0	-0.965038	-0.908023
0	-0.408133	-0.203504
0	-0.0144701	0.30036
0	2.05836	0.0286774
0	0.434639	1.0527
0	2.4837	0.312845
0	-2.16792	-0.327325
0	-0.193518	0.497168
0	0.925508	0.671378
0	0.108118	0.375579
0	-0.345619	-0.739343
0	0.573512	0.493958
0	0.0531683	0.726709
0	-0.801994	-0.56532
0	-1.37519	-0.85044
0	-0.217833	0.134029
0	0.576806	0.207832
0	-1.17209	-0.728643
0	-0.855515	0.0643302
0	-1.02981	-0.758256
0	0.507588	0.655406
0	-0.971982	-0.69544
0	-0.726436	0.125973
0	-0.447043	-0.486232
0	0.947782	0.053993
0	-1.22307	-0.55496
0	-0.965686	-0.319103
0	-0.670207	-0.280313
0	1.22008	0.557376
0	1.56326	-0.294661
0	1.19886	0.0794831
0	-1.09779	0.144601
0	-0.81378	0.404451
0	-0.253646	0.124872
0	1.15659	0.257346
0	0.0633848	-0.214948
0	-0.178628	0.636261
0	-2.12627	-0.120651
0	0.465008	0.17864
0	-0.199176	-0.730568
0	-1.83195	0.199149
0	0.886798	0.318768
0	-0.608251	-0.517674
0	0.248646	0.691663
0	-2.47254	-0.19199
0	-2.09681	-0.297103
0	-0.186596	-0.235587
0	1.66705	0.30475
0	-0.993141	-0.888419
0	-0.699197	0.270153
0	0.180616	0.590456
0	0.906954	0.352169
0	1.48971	-0.41484
0	1.34798	0.391534
0	0.51271	-0.0180626
0	0.331792	0.306163
0	0.635908	0.503355
0	-0.172996	-0.129484
0	0.0708934	0.727537
0	0.439354	-0.00940669
0	0.184856	-0.385099
0	-0.685621	0.10044
0	-0.372451	0.446152
0	-0.23305	0.386608
0	0.138933	0.201597
0	-0.283514	-0.714058
0	-0.0923083	0.262931
0	-0.214058	0.0561035
0	-0.625633	0.208537
0	0.0793914	0.31685
0	0.214591	-0.103964
0	-1.45786	0.0631314
0	-2.23328	-0.0665185
0	-1.10192	-0.692947
0	-0.847455	-0.703556
0	1.24444	0.191588
0	-2.23379	-0.485599
0	-0.707827	-0.21319
0	-0.219289	-0.0119427
0	-0.215239	0.126111
0	-1.22352	-0.0166403
0	-1.72339	-0.503127
0	0.586034	-0.488827
0	1.03697	0.578691
0	-0.757821	-0.483467
0	1.143	0.355041
0	1.96208	0.483111
0	0.883274	-0.482859
0	-0.563824	0.238489
0	-0.77639	-0.230252
0	-0.601107	0.291736
0	0.390937	0.334546
0	-0.59352	-0.515417
0	1.50874	0.875839
0	0.564372	-0.191243
0	1.72326	-0.0173729
0	0.533883	0.00366094
0	0.112978	0.00693913
0	0.226995	0.0195313
0	0.0286494	0.300802
0	1.36557	0.37426
0	-0.512488	0.308368
0	2.11906	0.220952
0	1.64701	-0.122403
0	0.763008	0.016994
0	0.0453122	-0.375087
0	1.61324	0.545056
0	0.823296	0.275801
0	-0.486932	-0.253107
0	-0.290851	0.146503
0	1.23283	-0.299958
0	-1.1534	-0.352498
0	0.139824	-0.00871993
0	-2.3763	-0.0257146
0	-1.18496	-0.642482
0	1.12321	0.103038
0	0.0141864	-0.203866
0	0.518217	0.520072
0	-0.243644	-0.543985
0	0.975314	0.0193999
0	0.481081	-0.38338
0	0.0898632	-0.445837
0	-0.368496	-0.534902
0	0.348736	0.431678
0	-1.04472	0.124409
0	1.69402	0.135516
0	-0.207553	0.413174
0	0.440722	0.110206
0	0.452541	0.562262
0	0.67764	0.0635123
0	1.07938	0.764499
0	0.25807	-0.447275
0	0.258978	0.0329242
0	0.944445	-0.165687
0	1.13353	0.249462
0	0.0446192	0.467447
0	0.0407927	-0.0102382
0	1.77094	0.324229
0	-0.280478	-0.326487
0	-0.851122	-0.259105
0	0.814747	0.0417089
0	1.09286	-0.117502
0	-3.28503	0.29006
0	0.503681	-0.330722
0	0.310117	-0.237784
0	1.11506	0.167388
0	-1.36141	0.172763
0	-1.59953	0.266747
0	-0.857628	-0.591158
0	-1.07454	0.0723627
0	0.795399	0.178163
0	-0.43012	0.285989
0	-1.03029	-0.252491
0	-0.787653	-0.331367
0	0.873796	0.449136
0	1.61971	0.0804366
0	-0.281354	0.147333
0	-0.295737	0.00231719
0	0.991906	0.529252
0	0.783353	0.377273
0	0.0754913	0.468309
0	-1.4403	-0.446439
0	2.04552	0.0835082
0	-0.778932	0.0353828
0	0.597711	0.472998
0	2.05658	0.0284681
0	0.154413	0.100557
0	1.74045	0.349377
0	0.153766	-0.0397498
0	-0.498443	0.249377
0	2.05794	0.546543
0	0.880591	-0.369057
0	-1.48557	-0.22902
0	0.758931	0.172602
0	-0.00117297	-0.27628
0	0.384444	-0.419672
0	-0.388541	-0.396127
0	-1.78948	0.26549
0	0.298235	-0.2751
0	-0.21655	-0.100337
0	0.193045	-0.46445
0	0.116564	0.18248
0	-0.496254	-0.323698
0	0.632934	0.0227161
0	0.302195	-0.24435
0	1.32135	0.567422
0	1.5858	0.654161
0	0.97856	0.070555
0	0.609762	0.61877
0	-1.31938	-0.26648
0	-1.53681	-0.598159
0	0.59203	0.137788
0	0.116668	0.182447
0	1.27173	0.0328377
0	1.1207	-0.225951
0	-0.211302	-0.0778574
0	-1.91264	-0.0572138
0	0.0267023	0.199996
0	0.467433	-0.341124
0	-0.316678	-0.901263
0	-0.24919	-0.575985
0	-0.496174	-0.210518
0	-0.85705	0.000407455
0	-0.376543	0.0653889
0	1.16957	0.775454
0	-0.57753	-0.70272
0	-1.18327	-0.539246
0	1.80653	0.506498
0	-0.837319	-0.76344
0	-1.17263	0.146961
0	1.75929	0.512487
0	1.62374	-0.0427165
0	0.556001	-0.41249
0	0.274142	0.513876
0	1.06327	0.615128
0	-0.694273	0.610275
0	0.923425	-0.153858
0	1.18799	0.072238
0	-1.20691	-0.594691
0	0.217995	0.202509
0	2.01673	0.671094
0	1.41946	-0.498433
0	1.10415	0.338131
0	0.952851	0.0489461
0	0.281334	-0.915269
0	-0.35342	-0.149542
0	0.529516	0.515457
0	-2.12944	-0.586646
0	-0.594796	0.022831
0	-1.8138	-1.1296
0	0.422275	0.848941
0	-0.273379	0.49728
0	-0.317748	-0.78062
0	0.755976	0.11285
0	1.95633	0.290028
0	-0.230279	-0.350364
0	-0.175074	-0.235682
0	0.764766	0.791546
0	0.677	0.0329498
0	0.709426	-0.329122
0	-0.0887975	0.540316
0	1.42456	0.612467
0	-2.65229	-0.570768
0	-0.343623	-0.751098
0	0.312901	-0.576651
0	0.160534	-0.970336
0	-0.414682	0.519606
0	-1.92439	0.255891
0	-1.50196	-0.74919
0	-1.36182	-0.692601
0	0.741248	0.574415
0	-0.453871	-0.113197
0	0.993476	0.257463
0	0.432757	0.437786
0	0.938701	0.434107
0	0.0809609	0.0938389
0	-1.31715	-0.266897
0	-1.7605	-1.01131
0	-1.95138	-0.558839
0	-0.538729	-1.0127
0	0.290756	0.270607
0	-0.260978	0.0396946
0	0.519365	-0.948863
0	-1.00922	0.0446619
0	2.04149	0.361881
0	0.24769	0.404205
0	0.423787	0.199896
0	0.681278	-0.183169
0	0.318478	0.664451
0	-0.429952	0.382948
0	0.528422	0.0182089
0	-0.846697	-0.886023
0	-0.423345	-0.0704266
0	-0.668683	-1.01189
0	0.791129	0.130854
0	0.38613	0.16642
0	-2.192	0.351842
0	0.0558774	0.367794
0	-0.540369	-0.240588
0	0.710508	0.174294
0	1.58258	0.221925
0	0.795155	0.348615
0	-1.86134	-0.861593
0	0.15629	0.292504
0	0.38895	-0.0163764
0	-0.823818	0.00489776
0	-0.292955	-0.0260211
0	0.159003	0.308491
0	0.55111	-0.015481
0	-0.839194	-0.703635
0	0.487797	-0.229421
0	-0.392734	-0.0926931
0	0.209993	-0.172401
0	0.140924	0.576521
0	-1.45424	-0.0197416
0	-0.2137	0.402462
0	0.230871	0.115813
0	-2.30335	-0.00503424
0	-0.885171	-0.172523
0	0.521655	-0.121647
0	-1.4258	-0.298832
0	-0.91817	-0.0485789
0	0.524984	0.220593
0	0.761757	0.195205
0	-0.00666501	-0.449617
0	2.10937	0.689649
0	-2.57465	0.438213
0	-0.084765	0.0903239
0	-3.24823	-0.481429
0	0.407463	-0.0654637
0	1.84437	-0.0405975
0	-0.0355042	-0.255292
0	0.373651	0.594843
0	0.327508	0.113704
0	0.116174	-0.274528
0	-1.18536	-0.5346
0	-1.48566	-0.920872
0	-0.00821082	-0.284935
0	0.320349	0.873592
0	0.760706	0.370518
0	-0.502061	-0.616311
0	-0.212704	-0.110769
0	-0.411042	0.111011
0	-0.467733	-0.241688
0	1.57478	-0.219933
0	-0.242	0.0134603
0	0.920197	-0.0989597
0	0.682612	-0.542351
0	-0.241542	0.253987
0	0.745501	-0.161538
0	-1.32732	-0.55432
0	-0.458578	-0.0765626
0	-0.945447	-0.422919
0	0.121753	-0.398678
0	0.154464	-0.177696
0	0.0320925	0.0458427
0	1.4247	0.0303094
0	-0.252658	0.136105
0	-0.52849	-0.040761
0	0.0342396	-0.443315
0	-0.861265	-1.14207
0	1.005	-0.222632
0	0.330508	0.275704
0	-1.58653	-0.0152279
0	-0.168004	-0.688573
0	0.846984	-0.022501
0	1.25183	-0.0847344
0	-0.154916	-0.00661307
0	0.446262	0.351467
0	0.309795	0.322083
0	1.05346	0.180071
0	-0.500991	-0.736572
0	-1.75678	0.793774
0	0.541082	-0.308252
0	-0.0500105	0.0972747
0	0.373403	-0.119007
0	0.209702	0.475419
0	-0.00113944	-0.294963
0	-1.32999	0.100362
0	-0.348284	-0.213728
0	0.407196	-0.211207
0	0.477948	0.213336
0	0.577279	0.0499578
0	-1.13927	-0.224501
0	1.07839	0.136281
0	1.13163	0.609712
0	0.347005	0.33612
0	0.775821	0.242333
0	0.331748	-0.148124
0	-1.64363	-0.308374
0	-0.347145	-0.263758
0	-0.0724514	-0.160483
0	-0.0252566	0.271149
0	0.153702	-0.256172
0	-1.70188	-0.463458
0	-0.658377	-0.460259
0	0.469972	0.305006
0	0.111556	0.0753205
0	0.225736	0.0137801
0	0.197841	-0.0562421
0	0.155739	0.247643
0	-0.878262	0.296702
0	-0.598243	-0.0881198
0	0.663527	-0.407381
0	-0.329435	0.13438
0	-0.434623	-0.360373
0	0.127645	-0.334292
0	2.14756	0.129213
0	1.42261	0.133769
0	1.21463	0.456666
0	1.95118	0.350796
0	1.07504	0.209204
0	1.58884	0.574193
0	1.31864	0.238619
0	0.685066	-0.173838
0	-0.332372	0.066962
0	0.65023	-0.172184
0	0.491586	0.437711
0	-0.91645	0.26891
0	0.354138	-0.200404
0	-0.489835	0.00194408
0	-1.98329	-0.356836
0	-1.71862	-0.118442
0	0.533797	0.367624
0	0.479364	0.53439
0	0.4612	0.120238
0	0.29882	0.181576
0	1.28239	-0.150659
0	0.627849	0.139407
0	1.29581	0.518673
0	0.671477	0.157958
0	-1.21012	-0.773411
0	0.502935	0.0218946
0	-1.15537	-0.490056
0	-0.967161	-0.202925
0	-1.0992	0.104475
0	0.839515	0.18274
0	-0.316448	0.746472
0	0.783382	-0.601092
0	-1.4791	-0.657465
0	-0.345646	0.193857
0	-0.138326	0.370342
0	-1.08404	-0.405032
0	-0.201507	-0.140267
0	-1.55081	0.277
0	0.0810029	-0.130798
0	-0.0103679	0.40613
0	0.935466	0.283306
0	0.611628	0.104505
0	-0.52192	0.0163923
0	0.243877	0.426806
0	-2.61511	-0.428004
0	0.892946	0.54342
0	0.485005	0.053795
0	-0.66225	-0.0656434
0	-0.636139	-0.91953
0	-0.769768	0.223149
0	-1.42586	0.0349296
0	-0.543727	-0.291634
0	1.14034	-0.0379149
0	-0.961888	-0.265335
0	0.763307	0.286365
0	-0.306975	-0.302577
0	0.648841	0.533236
0	-0.710895	-0.364426
0	0.831948	0.228229
0	-0.178358	-0.781554
0	0.220144	0.0286283
0	-0.194331	-0.181185
0	0.175432	0.0400642
0	-1.32619	0.113806
0	0.401752	0.700688
0	0.916864	0.611237
0	-1.70684	-0.649078
0	-1.41675	-0.641411
0	0.262306	0.811723
0	1.14971	0.0579287
0	-0.0085426	0.474765
0	1.35349	-0.0657978
0	0.623672	-0.378595
0	0.586642	0.235277
0	0.243775	0.386661
0	0.24165	0.38986
0	-2.55917	-0.346733
0	-2.42018	-0.079527
0	0.0626643	0.122418
0	-1.39372	-0.714106
0	-0.309091	0.52498
0	-2.00091	0.724253
0	-1.75884	-0.828095
0	0.416933	0.00756357
0	0.262895	0.0960159
0	-0.951168	-0.573215
0	0.582119	0.554663
0	-2.54998	-0.343793
0	1.25735	0.288453
0	1.77521	0.280317
0	0.0594741	0.0843835
0	-0.618462	-0.42816
0	-0.29029	0.0713196
0	-0.962857	-0.571625
0	-1.11156	-0.408769
0	0.120139	0.344733
0	-0.507779	-0.311487
0	-2.24881	0.165432
0	-0.37888	0.0546317
0	-0.125385	0.128864
0	-1.94772	-0.223693
0	0.229216	0.373674
0	0.431927	0.696186
0	-0.598454	-0.45153
0	-0.651084	0.316053
0	1.23165	0.794193
0	0.412161	0.311423
0	1.00317	0.549974
0	0.70338	0.0879219
0	-0.928037	-0.710449
0	1.4549	-0.156518
0	-1.30613	-0.0624455
0	-0.563755	0.0812448
0	-0.651711	0.0394395
0	1.78092	0.184435
0	-1.65091	-0.813253
0	-0.75994	0.357766
0	-0.79156	0.83532
0	0.281637	0.143221
0	-0.875055	-0.198117
0	-0.707114	-0.215623
0	-1.57725	0.139336
0	1.04447	0.134581
0	-1.06095	-0.883851
0	2.18033	0.790488
0	1.5267	-0.205097
0	-1.544	-0.375377
0	-0.067422	-0.0347077
0	-0.860548	0.254166
0	0.443683	-0.261068
0	2.25875	0.4589
0	-0.777516	-0.682748
0	2.03843	0.171866
0	0.729846	0.238944
0	0.495546	-0.336604
0	1.12832	0.455297
0	-0.80471	-0.357373
0	-0.396538	0.194415
0	1.11841	0.582193
0	0.0689943	0.351673
0	-1.04375	-0.359724
0	0.0943828	-0.155349
0	-0.633439	-0.379068
0	0.1673	0.0819208
0	1.16347	-0.130109
0	0.678357	0.164809
0	-0.617922	0.225993
0	1.98246	0.20541
0	-0.165536	0.695447
0	-1.07815	-0.13037
0	-0.325967	-0.0752528
0	-0.725775	0.112991
0	0.189579	-0.00216151
0	-0.0832643	0.0859161
0	0.78639	0.116
0	-1.80636	-0.161937
0	0.885963	-0.357375
0	-0.388393	-0.392169
0	-0.86303	0.514322
0	-0.220349	-0.122692
0	0.334569	0.125496
0	0.350138	-0.112415
0	0.908748	0.0551952
0	-1.02323	-0.204969
0	0.633253	0.292372
0	0.00495994	-0.661812
0	0.232564	0.193535
0	-0.25726	0.526004
0	2.32649	0.695478
0	1.12187	0.443151
0	0.128601	0.759636
0	0.205907	0.266242
0	-0.616876	-0.301629
0	-0.00192767	-0.0995245
0	0.690153	0.183741
0	-1.7163	0.202798
0	-1.28105	-0.542624
0	0.219516	-0.293418
0	0.221716	0.138583
0	1.02544	-0.195909
0	-0.539041	-0.491768
0	-0.289572	-0.369004
0	0.254341	-0.339929
0	-0.00227716	0.293435
0	0.222158	-0.504881
0	-0.801228	0.0559629
0	-0.959416	-0.165971
0	-0.645143	-0.45964
0	-1.90143	-0.841377
0	-0.419876	-0.172192
0	-1.09647	-0.12941
0	0.265947	0.379708
0	-1.64945	-1.20028
0	1.084	0.264826
0	1.54137	0.145639
0	1.72718	-0.388443
0	0.495339	0.516132
0	-1.36174	0.381466
0	-1.24975	-1.12418
0	0.549102	0.081197
0	0.898433	-0.447251
0	0.105479	0.401419
0	0.646572	0.198514
0	-0.644548	-0.863647
0	0.126384	-0.707416
0	0.311318	-0.0256412
0	-1.65487	0.0607607
0	1.36649	-0.199318
0	-0.0240917	-0.234051
0	-2.00274	0.399853
0	-1.62698	-0.410383
0	0.30183	-0.137256
0	0.32192	-0.244287
0	-0.969719	-0.837561
0	0.338826	0.102309
0	-0.630954	0.139302
0	0.289212	-0.571546
0	-0.649944	0.257853
0	-0.947413	-0.450572
0	1.14925	0.0689426
0	0.524067	-0.173183
0	-0.969927	0.10704
0	-1.07001	-0.460968
0	-0.307494	-0.605594
0	1.29737	0.598249
0	0.783455	0.416061
0	-0.203359	0.203291
0	0.137396	-0.361353
0	0.118708	-0.0172708
0	-0.802427	-0.408903
0	-0.317803	-0.0776456
0	1.71109	0.682862
0	-0.761723	-0.679705
0	-1.24694	-0.430005
0	1.03691	0.306363
0	-0.549816	0.135873
0	-0.38637	-0.261448
0	0.787758	0.787398
0	0.508151	0.0212324
0	2.31294	0.915286
0	0.359306	-0.0779341
0	-0.0363946	-0.338187
0	-0.822389	0.117855
0	0.0496683	-0.103578
0	-1.26165	0.213451
0	1.17756	0.597991
0	-0.285941	-0.710459
0	1.41906	0.402386
0	-0.844411	0.272164
0	0.536759	0.163518
0	-0.05538	-0.44898
0	0.104215	-0.0194316
0	0.718233	-0.170824
0	1.31805	-0.456937
0	1.43684	0.161948
0	0.0708628	0.0520739
0	-1.82844	-0.157922
0	0.0594021	-0.0269746
0	1.33671	0.067591
0	0.454494	0.130667
0	1.48715	-0.249619
0	1.20119	-0.364627
0	0.10544	-0.354377
0	-0.0936069	-1.23823
0	0.484668	0.285822
0	-0.188663	0.570514
0	-1.03167	-0.109261
0	0.619168	0.299312
0	-0.74758	0.11442
0	0.369465	-0.338995
0	-1.58031	0.466425
0	-0.24248	-0.251678
0	1.30322	0.226461
0	1.33845	0.0537651
0	-1.22466	-0.683404
0	-0.608512	0.362762
0	0.0181507	-0.281683
0	-0.373539	-0.320994
0	-0.0452903	-0.100522
0	-0.546059	0.00465828
0	0.28406	0.79644
0	0.211126	-0.275277
0	0.0293699	-0.605529
0	-1.4725	-0.624892
0	0.8084	0.457741
0	0.754568	-0.58649
0	0.791566	-0.757156
0	-1.06946	-0.213392
0	0.39385	0.668559
0	0.77136	0.0465207
0	-1.21406	-0.68306
0	-0.541644	-0.0166628
0	-1.41552	-0.407612
0	-0.0301321	0.0346627
0	-0.788351	-0.698121
0	1.89425	-0.093183
0	-0.0183484	0.0393523
0	-0.684597	-0.0725933
0	-0.594878	-0.832947
0	0.887267	0.00569039
0	-0.084463	-0.0680091
0	0.780329	1.13826
0	0.126034	-0.154955
0	1.05863	-0.846629
0	1.48242	-0.386914
0	0.537394	-0.453979
0	-0.668561	-0.451105
0	1.28502	0.15634
0	0.742588	-0.44808
0	-2.17546	-0.0156581
0	-0.668143	0.33021
0	-0.20234	-0.644079
0	-1.14682	-0.65019
0	0.0552285	0.152554
0	0.525236	0.703202
0	0.670355	-0.553148
0	0.0814503	0.0597813
0	0.122888	-0.054608
0	0.278729	0.630656
0	0.594186	-0.256335
0	-1.01729	-0.558411
0	0.100007	-0.133083
0	0.882177	-0.215245
0	-0.30932	-0.238064
0	-0.905966	-0.273808
0	0.317139	0.47596
0	0.185689	-0.216621
0	-0.541762	-0.188451
0	-1.00824	-0.346543
0	1.38406	0.150328
0	-0.643357	-0.301155
0	0.271805	-0.0863441
0	1.06933	0.079852
0	0.0497756	-0.357212
0	-0.0966469	0.232902
0	1.79832	0.679837
0	0.77802	-0.441363
0	0.521528	0.407559
0	-1.0109	0.309709
0	-0.233763	-0.515171
0	-1.32607	-0.668217
0	0.231893	-0.474764
0	0.139016	0.0541608
0	0.0405446	0.0653671
0	-0.751614	-0.0739198
0	-0.10067	-0.511595
0	-0.18128	-0.21711
0	0.437223	-0.292504
0	1.9951	-0.384439
0	1.41167	-0.0502751
0	-0.67516	0.477672
0	0.726041	0.874242
0	-0.872512	0.209204
0	-0.715135	0.638064
0	-0.675574	0.0131656
0	-0.0496591	-0.110172
0	-0.31282	0.314848
0	-0.231371	-0.512297
0	0.964379	0.231733
0	0.737293	0.249477
0	0.388946	0.247512
0	-0.759448	0.723719
0	-0.325362	0.390437
0	-0.478428	-0.0812442
0	-0.427191	0.20157
0	-0.677578	-0.418541
0	-0.274056	0.286894
0	-1.60463	-0.225483
0	0.865172	0.646474
0	-0.436702	-0.257603
0	-0.760059	0.148716
0	-2.56722	-1.05064
0	0.872986	0.394301
0	-0.165973	0.620188
0	-0.533956	0.190731
0	-0.633	-0.444171
0	0.754936	0.684017
0	-0.297546	-0.540555
0	0.181463	0.171915
0	1.67545	0.340741
0	0.463292	0.194029
0	0.682324	0.266982
0	1.41383	0.594027
0	0.278645	-0.584635
0	0.229269	-0.331333
0	1.6546	0.119147
0	0.635339	-0.23245
0	0.470803	0.178472
0	-0.0526387	0.106277
0	-2.30225	0.0762401
0	-1.03198	-0.0834075
0	-1.92543	-0.248948
0	-1.59631	-0.461028
0	0.299717	-0.276443
0	-0.174513	-0.0346127
0	-0.556938	-0.0756708
0	0.106593	0.10172
0	-1.40061	-0.879931
0	-0.864433	-0.0750431
0	1.44332	0.694349
0	-0.640257	-0.435948
0	-0.0865726	0.449158
0	0.986252	0.681836
0	-1.04948	-0.649181
0	-0.0309703	0.199666
0	-1.23519	-0.0814025
0	0.103058	0.625484
0	-1.80577	0.23583
0	-0.383269	0.786118
0	1.66582	0.513129
0	-2.7871	0.201948
0	1.02678	-0.205534
0	-0.145882	-0.146193
0	-1.95796	-0.914996
0	-1.21962	-0.618082
0	0.0809504	0.381434
0	-1.12899	-0.422204
0	-0.791766	-0.444663
0	-0.690781	0.146992
0	1.41814	0.920651
0	0.897066	0.414982
0	1.34218	-0.026363
0	0.616005	0.379644
0	0.464114	-0.651355
0	0.483967	0.247966
0	1.05264	0.164469
0	1.2838	0.255722
0	-1.49547	0.255498
0	-0.414415	0.145298
0	-0.312794	-0.106306
0	0.778324	0.830915
0	-0.761881	0.247466
0	0.564184	0.634294
0	0.695974	0.582387
0	-0.34602	0.240633
0	0.681091	0.631762
0	0.468912	0.553271
0	-0.71998	-0.141004
0	-0.192475	-0.518854
0	0.340657	0.809006
0	0.82964	0.23562
0	0.726812	0.165805
0	-0.0695145	-0.261088
0	0.255575	-0.481497
0	-0.770709	0.42862
0	0.510725	-0.42883
0	0.00665802	0.817379
0	-0.521762	0.538466
0	-2.74395	0.0276978
0	-0.7918	-1.39999
0	0.720117	-0.0400719
0	-0.328884	0.0322602
0	-0.342821	-0.256778
0	-1.59464	-0.0710222
0	0.485477	-0.367305
0	0.0586415	0.324939
0	0.489566	-0.718091
0	0.187095	-0.414684
0	-1.09472	-0.177123
0	-0.151606	0.0764784
0	0.237026	0.299996
0	-1.05558	0.456379
0	0.945328	0.631609
0	0.442267	0.534393
0	-0.334796	-0.456348
0	-0.0282072	-0.195254
0	0.652591	0.82284
0	1.06791	0.881987
0	-0.316759	0.28017
0	-0.282511	-0.360467
0	1.52065	-0.171066
0	-0.343498	-0.123934
0	1.38946	0.823192
0	-0.744229	-0.526836
0	1.76805	-0.0125746
0	-0.110718	0.234093
0	0.781073	0.569054
0	0.339568	0.328345
0	-0.269337	-0.120885
0	-0.505313	0.0583812
0	-1.01592	0.0842337
0	-1.187	-0.169126
0	1.96011	0.482345
0	0.268865	0.0968401
0	-0.516029	0.177312
0	0.722862	0.215845
0	-0.0181582	0.167718
0	-0.600288	0.312888
0	-1.94489	-0.0201604
0	-0.237504	-0.371882
0	2.34224	0.216374
0	-0.609854	0.167793
0	1.02467	-0.429101
0	1.04106	0.0630755
0	0.2964	0.0561524
0	-0.327804	-0.272989
0	1.263	0.45833
0	-0.96515	-0.259403
0	0.642218	0.378245
0	1.25955	0.506554
0	-0.72031	-0.692667
0	1.84799	-0.00450582
0	0.781182	-0.0344684
0	0.269607	-0.188602
0	-1.71393	-0.518703
0	0.385452	0.470439
0	-1.49276	-0.975057
0	0.252145	-0.0231944
0	1.09453	-0.60979
0	0.50924	0.216701
0	-0.412757	0.139958
0	-0.16374	-0.517617
0	1.19452	-0.0191515
0	-1.14178	0.110985
0	0.450372	0.0991959
0	0.51054	0.406999
0	-0.237106	-0.0641143
0	-0.706823	-0.617917
0	1.10727	0.33793
0	-0.199157	-0.902095
0	-0.0379879	0.715628
0	1.95969	0.398315
0	-0.271701	0.0693416
0	-1.96756	-0.40567
0	1.3374	0.619951
0	-0.595872	-0.0511989
0	-1.38074	-0.440953
0	-0.388164	0.233753
0	-0.237468	-0.408075
0	1.44234	0.743938
0	1.96325	0.0825991
0	0.642843	0.415081
0	-0.395502	0.208695
0	1.8392	0.115303
0	-0.104654	-0.68331
0	1.4185	0.24605
0	-2.01973	0.339801
0	0.206359	0.319976
0	0.80889	-0.0442741
0	-0.250719	0.125307
0	-1.24186	0.216288
0	0.178267	0.0498895
0	2.44977	0.954104
0	-0.61174	0.68581
0	0.556668	-0.314135
0	-1.51824	-0.875357
0	-0.479918	0.137381
0	-0.0550052	-0.59758
0	-0.985265	0.166858
0	-1.29952	-1.31755
0	-1.3513	-0.112463
0	-0.932314	-0.496192
0	0.536619	-0.184988
0	0.146509	0.0647089
0	-0.211011	-0.112503
0	1.06807	0.499082
0	1.04134	-0.824457
0	-1.95713	-0.422684
0	-0.253836	0.116841
0	0.409459	0.656029
0	-1.33367	-0.570372
0	0.207402	0.147188
0	-0.678151	0.810556
0	0.705964	-0.276418
0	0.769369	-0.140394
0	-0.234803	-0.542677
0	0.313826	0.0234115
0	0.770639	-0.0406653
0	1.92497	0.38096
0	-1.74587	-0.601346
0	0.12173	-0.0172778
0	0.173636	0.526586
0	0.0322853	0.341812
0	-1.24739	0.0887915
0	-0.665244	-0.515927
0	0.48188	0.324583
0	1.71749	0.27229
0	1.2762	0.412791
0	-0.0640099	-0.0317396
0	-2.04012	0.52895
0	0.78996	-0.300959
0	-0.691525	-0.118022
0	-0.0481088	-0.355812
0	-0.961195	-0.503835
0	0.402835	-0.592615
0	-0.716382	-0.0166245
0	0.415986	0.459264
0	-0.370186	0.0194547
0	1.4204	0.493004
0	-1.9003	-0.569219
0	0.471551	0.0137553
0	0.974752	-0.279314
0	-0.518168	-0.493934
0	-0.267665	-0.251992
0	0.387103	-0.906107
0	0.21569	-0.212921
0	-0.170957	0.628814
0	0.589684	-0.0384239
0	1.28121	0.44071
0	-0.891315	-0.209215
0	-0.47274	-0.381915
0	-0.223464	-0.0983272
0	-0.951405	-0.407045
0	-0.263141	-0.196188
0	0.298492	-0.275037
0	1.97042	0.111634
0	-0.423453	0.149845
0	1.57361	0.0425105
0	0.0468039	-0.560082
0	-0.425025	-0.419755
0	-0.624629	0.27588
0	-0.554376	-0.316769
0	1.14799	0.181309
0	0.457482	-0.368576
0	1.23563	0.299603
0	-0.907108	-0.192722
0	-1.79026	0.0633618
0	-1.49946	-0.000388929
0	1.00578	0.478857
0	-0.712885	-0.196799
0	-1.03439	-0.422751
0	1.31919	-0.549872
0	-0.842114	-0.581579
0	-0.530979	0.0578067
0	0.764703	-0.0166415
0	-1.49821	-0.793259
0	0.886739	0.825312
0	-0.163956	0.697763
0	0.49704	-0.0769266
0	0.0590539	0.0116021
0	0.295699	-0.283296
0	-0.983512	0.324196
0	1.35515	-0.162774
0	-0.391767	0.0493205
0	1.77681	0.262597
0	0.243158	-0.208266
0	1.03908	1.07424
0	0.0767944	0.409209
0	-0.460605	0.175218
0	0.201941	0.0356902
0	-0.317657	0.114281
0	0.563591	0.44012
0	-1.14797	0.61561
0	-0.403713	0.344379
0	-0.212852	-0.521694
0	0.601894	0.505974
0	0.0988716	-0.122318
0	0.194547	-0.103573
0	0.28905	0.370105
0	-0.86924	-0.667881
0	0.826756	-0.364449
0	-0.32583	0.255954
0	0.865223	-0.199882
0	1.17245	0.885011
0	-0.720625	-0.223199
0	0.64224	0.348202
0	0.0805673	0.411032
0	0.446427	0.302835
0	-0.0579316	-0.0125494
0	0.0462687	-0.298666
0	-1.21684	-0.373225
0	-0.205137	0.665404
0	0.00240962	0.292832
0	0.718268	-0.37522
0	-0.702789	-0.214526
0	-0.805455	-0.254896
0	0.549563	-0.190997
0	1.14773	-0.590935
0	-0.266233	-0.58772
0	1.11822	0.0890495
0	1.14058	-0.563451
0	-3.02361	-0.112886
0	0.306919	0.712936
0	-0.816162	-0.258504
0	-1.06517	0.538997
0	0.746617	-0.106695
0	-0.307904	0.369099
0	0.544953	0.720289
0	0.178198	0.112903
0	-0.759647	0.0565806
0	-1.00267	-0.00447113
0	-1.64319	0.021989
0	0.435919	-0.173995
0	-0.827773	0.440402
0	-0.232075	0.172293
0	0.226516	-0.535956
0	-1.35585	0.19451
0	-1.17468	-0.462793
0	-0.660588	-0.0887659
0	-0.300212	-0.844585
0	2.26388	0.7398
0	0.213554	-0.373938
0	-0.339685	-0.0807307
0	0.173059	-0.0553458
0	-0.375125	0.383652
0	0.430511	-0.34861
0	0.52301	-0.416267
0	0.711017	0.2378
0	2.4912	0.565628
0	0.190116	0.0583344
0	-1.09262	0.0175357
0	-1.73498	-0.454192
0	0.356763	0.24768
0	0.225734	0.141137
0	0.538727	-0.30907
0	1.05592	0.241537
0	1.44438	0.56518
0	-0.690606	-1.03506
0	-0.304861	-0.116194
0	0.124083	-0.0854055
0	0.407277	-0.576743
0	-0.798994	-0.421675
0	0.603812	0.323336
0	-0.89786	-0.479363
0	0.873043	-0.198749
0	2.78895	1.0986
0	1.53542	0.409561
0	-0.791041	-0.563431
0	0.0192697	0.169243
0	0.267199	0.103658
0	-1.1384	-0.227325
0	-0.160326	-0.473747
0	0.782862	-0.0220487
0	-0.311099	-0.366713
0	2.9799	1.08439
0	-0.576394	-0.00679117
0	-0.525555	-0.465237
0	0.854852	0.366505
0	1.26228	0.33132
0	-0.630365	-0.0437195
0	-0.399286	-0.22517
0	-1.73219	0.000145389
0	-2.48491	-1.42895
0	0.0295631	-0.42673
0	-2.44252	0.421664
0	0.132895	-0.386819
0	2.02666	0.54618
0	-0.173671	-0.303227
0	0.0299551	0.22282
0	1.17173	0.252482
0	0.595972	0.441899
0	0.563081	0.433693
0	0.310887	0.00119239
0	0.930437	-0.703135
0	0.0994755	0.297377
0	-3.32428	-0.791753
0	-0.885751	-0.672406
0	-1.4918	-0.996326
0	0.548729	0.126674
0	0.357826	0.260073
0	-0.856986	-0.47226
0	-0.23193	0.0926794
0	1.11374	-0.340656
0	0.666659	0.283601
0	0.365043	0.0834607
0	0.33405	-0.258949
0	1.21592	0.113477
0	0.00104686	0.107965
0	0.738986	0.740983
0	0.886784	0.368237
0	0.860242	-0.00570903
0	0.568331	-0.133234
0	-0.0574988	-0.203429
0	-0.965635	-1.16278
0	1.57216	-0.130602
0	0.0201465	0.12636
0	-1.31152	-0.120079
0	0.966911	-0.749924
0	-0.0979053	0.0957143
0	-1.08238	0.0346081
0	1.64685	0.406874
0	-0.365554	-0.208118
0	-1.43743	-0.975737
0	0.775804	-0.167914
0	0.275176	0.561242
0	-0.789769	0.182576
0	-1.57732	-0.120353
0	-0.778833	0.00900789
0	1.43184	0.494135
0	0.740908	1.07817
0	-0.621066	-0.448524
0	-1.41193	0.124006
0	0.597144	0.506301
0	0.653222	0.131159
0	-2.33782	-1.09438
0	0.145499	0.778013
0	-0.632535	-0.177708
0	-0.753214	-0.227831
0	-1.15003	-0.167849
0	-0.353923	0.0728201
0	0.822363	0.0215582
0	1.73515	0.76689
0	0.00729275	0.142945
0	0.678303	0.178286
0	-0.770205	-0.0290588
0	-0.920971	-0.224869
0	0.75139	0.330276
0	-0.165065	-0.901614
0	-0.141928	0.73921
0	2.15726	0.321015
0	1.23732	0.404117
0	0.0903708	-0.131541
0	1.22883	-0.322147
0	0.337324	0.0992225
0	-1.76034	-0.930411
0	0.28163	-0.753672
0	-1.34174	-0.00999148
0	-0.398517	-0.118193
0	-0.146627	-0.187003
0	1.37341	1.06513
0	-0.496641	-0.154229
0	-0.278627	-0.10301
0	-0.214815	-0.402124
0	-0.608314	-0.3507
0	-0.0938635	-0.383409
0	-1.0599	-0.546805
0	0.0805276	0.447201
0	-0.226548	-0.837067
0	-0.660778	0.170323
0	-0.745744	-0.0984966
0	0.401457	-0.192735
0	0.0356204	-0.674156
0	0.630134	0.553722
0	-0.217563	-0.743042
0	-0.0294328	-0.19101
0	0.134612	0.0905039
0	0.389881	-0.344642
0	1.01147	0.130095
0	0.363426	0.45055
0	-1.68033	-0.371956
0	-0.911293	0.326415
0	-1.05058	-0.901724
0	0.79975	-0.207489
0	1.46349	-0.553823
0	-1.65217	-0.914211
0	-0.49542	-0.615933
0	0.929689	-0.00334686
0	-0.446172	-0.306557
0	-0.242515	-0.164106
0	1.60908	0.757538
0	0.198614	0.146654
0	-0.176142	0.314061
0	-1.18749	-0.245902
0	-1.67639	1.09962
0	0.56302	-0.196354
0	-0.25744	-0.22552
0	-1.27331	-0.733953
0	-0.691058	-0.189101
0	-1.21576	0.0361607
0	0.99476	-0.345935
0	-0.866666	-1.20787
0	-0.134561	-0.196631
0	-0.0885468	0.21331
0	0.863476	0.0983721
0	1.80397	0.339061
0	-0.227816	-0.860044
0	-0.110921	0.439099
0	1.65227	0.08412
0	0.0773364	0.472648
0	0.67165	-0.554309
0	0.664596	0.293924
0	-0.492957	-0.30635
0	-0.551943	-0.479474
0	0.300824	-0.478788
0	-0.420395	-0.299418
0	0.199691	-0.220609
0	-1.14552	0.00781111
0	0.586143	0.194507
0	0.670212	0.0326674
0	3.20398	0.545953
0	1.4559	0.647618
0	1.50015	0.391568
0	-1.20969	-0.72107
0	-0.806412	0.636431
0	-0.585727	-0.246292
0	1.62616	-0.375488
0	0.958996	-0.206889
0	0.544576	-0.115159
0	-1.50658	-0.458486
0	0.279031	-0.454709
0	1.14256	0.335537
0	0.198693	0.516721
0	-0.277796	-0.762671
0	0.88664	-0.202938
0	-1.53902	0.340721
0	-0.406277	0.440963
0	-0.326936	0.185438
0	0.465369	-0.36289
0	1.06477	-0.277369
0	-1.46318	-0.981466
0	-1.21947	-0.337412
0	0.387047	0.182392
0	-1.00345	-0.108635
0	0.280634	-0.0358729
0	-2.17586	-0.48792
0	0.110927	0.769992
0	-0.163496	-0.657308
0	-1.4356	-0.380723
0	-0.71593	0.100008
0	-0.178673	-1.08755
0	-0.0379433	0.115512
0	-0.0974916	0.0231783
0	0.110767	0.483585
0	0.699737	-0.0565525
0	-0.565346	0.0910132
0	-0.190025	0.615413
0	0.682714	0.850005
0	-0.783369	-0.134123
0	1.32412	-0.0555888
0	0.64717	0.571715
0	-0.22693	0.337941
0	-0.851988	-0.344847
0	0.415286	-0.305891
0	-1.5436	-0.634542
0	0.761156	0.218304
0	0.633785	0.7025
0	0.0170624	-0.743869
0	-0.649868	-0.103535
0	-0.713759	0.371476
0	0.108891	0.411206
0	0.78263	0.311882
0	0.503965	0.482361
0	0.658246	0.249993
0	0.747375	0.655407
0	-0.98492	-0.0417582
0	0.216248	-0.435096
0	-0.907529	-0.100516
0	-0.730189	-0.552747
0	-0.56686	0.249312
0	-2.26621	-0.598055
0	-1.29392	-0.522428
0	0.506138	0.038217
0	-0.235468	-0.569404
0	-1.40716	-0.186832
0	0.250386	-0.320412
0	0.682237	-0.0373746
0	0.0957726	-0.0970707
0	0.713757	-0.0229048
0	-1.81581	-0.282759
0	-1.09931	0.0629257
0	0.601615	0.42749
0	0.32553	-0.364828
0	-0.656486	-0.275793
0	-0.453697	0.327305
0	1.37153	-0.0200279
0	-0.795308	-0.175878
0	-0.181445	0.394349
0	0.660938	0.467083
0	0.258154	0.276875
0	0.401021	0.180255
0	2.1532	0.2888
0	-0.431495	-0.747529
0	0.847399	-0.266234
0	-0.540496	0.0770278
0	-0.134693	0.0499079
0	1.94966	0.0854449
0	0.488462	0.256475
0	0.75307	-0.159311
0	1.51044	0.378731
0	0.189058	0.76185
0	0.759736	-0.0486125
0	-0.244492	0.828773
0	-0.517796	0.0885492
0	0.212462	-0.414663
0	0.342693	-0.126639
0	-0.885716	-0.185491
0	0.418357	-0.298237
0	0.65872	0.213269
0	-0.473938	-0.0972005
0	-0.95023	0.428132
0	-1.22177	-0.385431
0	-0.673998	0.137573
0	-1.62816	-0.899765
0	0.153715	0.351744
0	0.0637903	0.488578
0	0.643317	-0.000577476
0	0.419626	-0.289743
0	-0.791779	-0.766624
0	0.177998	-0.459222
0	-1.88928	-0.237624
0	0.598724	-0.0554232
0	0.0260098	0.697344
0	1.01167	0.296572
0	0.786443	0.703511
0	-1.38772	0.0991614
0	-0.0782516	-0.695934
0	-0.180879	0.340203
0	-0.388408	-0.133178
0	-2.19755	0.302559
0	0.139086	0.387059
0	-0.860811	-0.326646
0	0.419491	-0.708392
0	-0.144172	-0.76021
0	-0.187062	-0.544131
0	-2.46219	-0.17067
0	0.969751	0.213255
0	0.279697	0.621023
0	-0.563544	-0.20111
0	0.918394	-0.0425294
0	-0.685884	-0.602289
0	0.911744	0.388131
0	-0.591315	-0.458785
0	-1.71393	0.0161596
0	0.25232	0.388119
0	0.144337	0.0973029
0	1.20315	0.354629
0	0.347443	-0.34902
0	0.443027	-0.2759
0	0.414393	-0.69308
0	0.87063	0.217604
0	-0.0698054	-0.449819
0	2.08995	0.264824
0	-0.111968	0.72907
0	0.828682	0.657564
0	0.331468	-0.321375
0	-1.92837	-0.504701
0	-1.47646	0.148962
0	0.816059	-0.609822
0	-0.556702	-0.214683
0	-0.359547	0.200459
0	-0.889163	-0.189657
0	-2.56673	-0.616593
0	0.420237	0.0915359
0	0.694371	0.341521
0	-0.554433	-0.0371843
0	-0.788952	0.442067
0	-1.29489	-0.651387
0	-0.128057	-0.0417166
0	-0.272014	0.448193
0	-0.117422	-0.725406
0	0.581703	-0.163057
0	-0.879641	-0.378773
0	-1.99422	-0.186118
0	-0.453617	-0.100441
0	2.42054	0.201177
0	-1.08944	-0.310323
0	0.794694	-0.0257049
0	1.68707	0.578783
0	0.181236	0.603762
0	-1.09324	-0.0286602
0	-0.81189	-0.132649
0	-0.0832264	0.0745928
0	-1.07011	0.166977
0	-0.0628667	0.275912
0	1.76841	-0.579796
0	1.27772	0.374217
0	-0.713143	0.245687
0	0.623944	0.186373
0	-0.378072	0.0802196
0	0.969949	0.0624976
0	0.804723	0.493918
0	-1.93568	-0.297197
0	0.208252	0.240058
0	-0.122942	-0.425425
0	0.285079	1.18866
0	0.228132	0.833957
0	0.317582	-0.455663
0	1.21556	0.437836
0	2.08503	0.602049
0	0.869087	-0.0859816
0	0.603746	-0.0600398
0	-0.749335	-0.713892
0	-0.759599	-0.105893
0	-2.02526	-0.484522
0	-0.139238	0.181139
0	0.502735	-0.0832408
0	0.542234	0.239275
0	-0.148632	0.525189
0	-0.321206	0.0430902
0	-0.707236	-0.468358
0	-0.777513	-0.045766
0	-0.841956	-0.00605027
0	1.61409	0.341841
0	0.349604	0.542911
0	0.734537	0.210047
0	-0.66703	-0.729535
0	0.497191	0.420024
0	0.454811	-0.979533
0	-0.640523	-0.8155
0	0.247824	-0.297895
0	0.532935	-0.454492
0	-0.752615	-0.266607
0	-0.366724	0.325942
0	-0.0911172	0.129712
0	-0.130261	-0.238978
0	-0.654426	-0.850153
0	-0.344139	0.0120332
0	0.474226	0.0216715
0	0.0149445	-0.591036
0	1.04065	0.150502
0	-1.59303	-0.0230486
0	-2.42159	-0.874753
0	0.412876	0.306155
0	-0.564449	-0.279323
0	1.50591	0.509443
0	1.36823	-0.660871
0	-2.17908	-0.323625
0	-0.596095	0.000675779
0	0.758279	0.388795
0	-1.31909	0.217004
0	-1.13206	0.243901
0	-1.38123	-0.543106
0	1.46784	-0.013547
0	-0.385716	0.0219286
0	2.03725	0.243558
0	-0.654908	0.155301
0	0.360408	0.267469
0	-2.14376	-0.123302
0	-0.686054	0.357804
0	-1.89413	-0.447403
0	-0.333269	0.159975
0	-0.693029	-0.97221
0	-0.601318	-0.52811
0	-0.507331	0.708406
0	-1.09767	-0.45478
0	0.550967	-0.364778
0	0.61351	0.217967
0	0.233659	0.0799592
0	-0.193119	0.203948
0	0.159372	0.662942
0	1.48828	0.289862
0	-0.407465	-0.547223
0	1.85892	0.702261
0	-0.0680486	-0.42656
0	0.0539897	0.272915
0	-0.63189	-0.303704
0	-0.165767	0.204386
0	1.52431	0.75569
0	-0.314824	-0.262068
0	-2.413	0.0635482
0	0.976271	0.0540292
0	-0.568639	-0.0365644
0	1.43406	0.73105
0	0.470988	-0.0664162
0	0.820884	-0.508488
0	-2.44003	0.245573
0	1.58986	-0.337173
0	-0.589716	0.377074
0	-0.356898	-0.252555
0	0.242422	-0.482543
0	0.56592	0.22365
0	0.165241	0.00577344
0	-2.59661	-0.134263
0	-1.33196	0.0654708
0	-0.00863632	-0.331286
0	-0.152409	0.198989
0	-0.310898	-0.562545
0	0.555541	-0.541314
0	0.89621	-0.146912
0	-0.659945	0.382129
0	0.506818	0.178944
0	-0.629085	-0.393356
0	0.56411	-0.0330877
0	0.179507	0.390775
0	1.05911	0.637552
0	0.265179	0.123377
0	0.101208	0.690328
0	1.98815	0.150952
0	-0.332644	-1.11034
0	0.122901	0.297851
0	-1.66484	-1.01006
0	0.951761	0.265024
0	-1.23138	-0.133157
0	-0.729998	0.369498
0	-0.293744	-0.305847
0	1.03035	0.377774
0	1.2136	0.371008
0	0.283118	-0.173799
0	0.0653845	0.0238788
0	0.546041	0.322024
0	-0.330825	-0.51149
0	-0.633038	-0.361985
0	2.39012	-0.213162
0	0.453933	-0.851908
0	1.67783	0.342511
0	0.702023	-0.210038
0	0.0380533	-0.0670131
0	1.16854	0.522606
0	-1.17906	0.603591
0	0.307308	0.5537
0	0.519843	-0.570016
0	1.13782	0.00159302
0	-0.318669	-0.614648
0	0.541072	0.435959
0	0.862391	-0.214596
0	1.88306	0.512145
0	-0.246003	-0.719872
0	0.460717	0.288962
0	1.34484	0.310014
0	0.240137	0.188866
0	-1.1026	-0.392649
0	1.81692	-0.361316
0	-0.955075	-0.328803
0	-0.11591	-0.520699
0	-1.17221	-0.573678
0	1.65755	0.42813
0	0.44234	0.103337
0	0.128083	-0.0399509
0	-1.03439	-0.311224
0	0.795268	0.508222
0	-1.12926	-0.357582
0	0.0709131	-0.456512
0	-0.561703	-0.192937
0	-0.644959	-0.246188
0	-0.0258372	-0.00365042
0	-0.0312176	0.655409
0	0.466141	-0.468664
0	1.54069	0.214109
0	-0.224689	0.307633
0	-0.189311	-0.208644
0	0.0833781	0.355034
0	-0.890012	-0.478925
0	-1.0869	-1.15598
0	-0.319192	-0.122675
[truncated: 23,191 more rows]

## Sheet: Figure 8c
Distributions of the g-factor derived from cognitive tests via ESEM and predicted from stacked sMRI phenotypes.
Fold	Observed g-factor	Predicted g-factor
0	0.781714	-0.331048
0	-0.245697	0.582006
0	-1.30295	-0.871984
0	0.206406	-0.00852437
0	0.973856	-0.531064
0	-0.163542	-0.582968
0	-0.508179	-0.527978
0	-1.43894	-0.388729
0	-0.456774	0.613444
0	-2.70015	-0.129002
0	0.627278	0.286814
0	-1.47521	0.419039
0	0.746731	-0.122531
0	0.835399	0.249057
0	1.25552	-0.433654
0	-0.498227	0.22547
0	-0.263366	-0.458278
0	0.296363	-0.0670406
0	-0.611345	-0.427905
0	-1.0452	-0.291702
0	0.540353	0.599085
0	1.01158	0.161727
0	-0.737759	0.076805
0	1.73265	0.193567
0	1.49913	0.202148
0	-0.412482	0.37022
0	-1.67574	0.123714
0	-0.81319	0.251356
0	-2.24822	0.202819
0	-0.206454	0.0783036
0	0.41402	-0.0557456
0	0.123942	-0.211441
0	-0.071625	-0.342663
0	-0.860071	-0.410506
0	-1.34027	0.231224
0	0.704576	0.336389
0	-1.6675	-0.664289
0	0.640992	0.325784
0	0.208127	0.750909
0	-0.0199941	0.383463
0	-0.682106	0.25962
0	1.07902	-0.52158
0	1.67184	0.354313
0	-1.19082	-0.211404
0	0.30909	0.628512
0	0.424735	0.520452
0	-1.20667	-0.12635
0	1.21687	0.160278
0	0.0950485	0.43597
0	0.167367	0.277688
0	-0.298537	0.484757
0	1.7969	0.436886
0	-0.892138	-0.233038
0	0.713257	0.0787841
0	0.927066	0.150678
0	0.405589	-0.437844
0	-0.523374	0.581477
0	0.921521	0.610835
0	1.14887	0.270166
0	0.500982	0.653292
0	-0.29822	0.434017
0	0.481033	0.119586
0	-1.28647	0.0928652
0	0.339068	-0.048699
0	0.920914	-0.301418
0	-0.446955	-0.249025
0	-0.699538	-0.127552
0	0.769268	0.725158
0	1.24242	0.450111
0	0.332015	0.425748
0	-1.04087	-0.335273
0	-0.881217	-0.272254
0	-0.22684	0.0239757
0	0.873001	-0.528609
0	0.159444	-0.407595
0	0.489067	-0.162627
0	0.149255	-0.37693
0	1.02641	0.535586
0	0.59079	0.0997536
0	-0.216278	0.253388
0	2.70239	0.211982
0	0.97467	-0.0947526
0	0.863051	-0.124968
0	1.73229	-0.41185
0	0.551749	0.367037
0	-0.404085	0.0578241
0	0.538426	0.0853061
0	0.170237	-0.675182
0	-0.045352	0.462325
0	0.67752	0.12786
0	1.22009	0.579686
0	-0.760572	0.00920715
0	-0.266439	-0.0136932
0	0.121892	0.544075
0	-0.211449	0.157024
0	-0.335142	0.417277
0	-1.25636	-0.627162
0	1.14728	0.674352
0	1.30659	0.725
0	-0.84226	-0.137275
0	-0.128963	0.147719
0	0.999927	-0.409588
0	-0.0211996	0.376064
0	-1.63251	0.491171
0	-1.1593	0.361091
0	1.13263	0.349693
0	-0.915591	-0.222087
0	-1.58306	0.079203
0	-1.1173	-0.38668
0	0.52434	0.346841
0	-0.797601	0.41385
0	-1.31854	-0.143005
0	0.514314	0.0917601
0	-1.72438	-0.431463
0	1.82716	0.0217157
0	-0.679664	-0.19295
0	0.184407	-0.0667227
0	-0.413104	-0.168123
0	-0.0996617	0.295696
0	0.0798016	0.173582
0	-0.0147326	0.575819
0	-0.766129	0.00969746
0	0.393569	0.199815
0	0.140428	0.414863
0	0.621269	0.316992
0	0.884485	0.223659
0	-0.769996	0.115529
0	1.14799	-0.0425855
0	-0.476134	-0.019825
0	0.157396	-0.157891
0	0.0356178	-0.122511
0	0.660296	1.10929
0	-0.854262	0.307919
0	-1.81075	-0.651784
0	-0.532369	-0.162545
0	0.458063	0.138952
0	-0.0661729	0.171924
0	0.293197	-0.0197007
0	-1.13559	0.175363
0	-1.67355	-0.270506
0	-1.14948	0.100694
0	0.650434	0.213846
0	-0.122041	0.517332
0	0.0420498	0.0366193
0	0.639526	-0.0564626
0	0.371688	-0.618112
0	0.623662	-0.10324
0	-1.01505	-0.443861
0	1.21445	0.164609
0	-0.376654	0.204138
0	-1.42304	0.152816
0	0.134979	-0.445583
0	0.374698	0.242985
0	0.489211	0.305436
0	-2.18637	-0.838312
0	-0.0749354	0.278431
0	0.73212	0.37864
0	1.73614	0.572453
0	-0.0311947	0.100822
0	0.806301	0.398193
0	-0.119091	0.080998
0	-0.721455	0.166888
0	-0.0574666	0.510386
0	-0.17285	-0.874939
0	-1.81545	-0.772033
0	0.14224	-0.418054
0	-0.35349	0.75429
0	1.37199	0.244691
0	-0.180362	-0.277603
0	0.0272182	-0.87238
0	0.412167	-0.0602849
0	0.778795	-0.0220597
0	1.69365	0.304464
0	-2.19348	-0.661817
0	-0.103654	0.128277
0	1.26678	-0.495544
0	0.617756	0.145022
0	0.724756	-0.161798
0	0.643901	-0.0168795
0	-0.462963	0.24855
0	-0.0423585	0.731179
0	-0.159963	-0.144306
0	0.0905263	-0.261027
0	-0.26257	0.229835
0	0.635491	-0.811875
0	-0.135291	0.204399
0	-0.387262	-0.085137
0	0.232861	0.371856
0	0.793129	0.346245
0	-0.189092	0.00886411
0	-1.18876	-0.691963
0	0.499545	0.258798
0	0.439212	-0.559489
0	-0.44889	0.6863
0	0.757939	0.184929
0	-0.182674	-0.0615911
0	-0.845094	0.121368
0	-0.496098	0.218613
0	-0.51375	0.147227
0	-0.905918	-0.797422
0	1.11768	0.109551
0	1.16259	0.204687
0	0.835278	-0.0598199
0	0.145356	0.0210282
0	1.03275	0.0270297
0	-0.106727	0.2173
0	-0.960629	0.131218
0	0.1732	0.150858
0	1.03116	0.169318
0	-2.29998	-1.11279
0	0.0938717	0.366638
0	0.216422	0.612236
0	0.563921	0.233363
0	0.300891	-0.0264914
0	0.743389	-0.0044175
0	0.291372	0.336928
0	-0.108527	-0.355851
0	1.5063	0.232216
0	-0.687404	0.597979
0	0.662383	0.44197
0	0.0918709	0.300311
0	-0.0145093	-0.236778
0	-0.0856177	0.434847
0	-1.23022	-0.345313
0	-0.458197	-0.0817709
0	1.22015	0.552933
0	0.180906	-0.761134
0	-0.0653312	-0.184546
0	-2.11529	-0.344607
0	1.91725	0.0548906
0	-1.12867	0.617099
0	-0.99899	-0.416686
0	-0.49475	0.050397
0	1.36371	0.831279
0	1.06408	0.136251
0	-0.599975	-0.361693
0	-0.314738	0.0936901
0	-0.209117	0.0030839
0	0.670427	-0.0037954
0	1.09654	-0.0173418
0	-0.477778	0.294726
0	-1.62978	-0.258903
0	-2.0492	0.413499
0	0.744885	0.149953
0	0.271488	0.142592
0	-1.31969	0.0650978
0	1.9908	0.304358
0	-0.519786	0.385671
0	0.764695	0.256016
0	0.577106	-0.484314
0	-2.70263	-0.38056
0	1.38321	-0.525951
0	0.16754	0.0235049
0	0.608262	0.287102
0	-1.27058	-0.00250617
0	-1.20894	0.20581
0	0.896425	0.590152
0	0.0562077	-0.210445
0	-0.0966994	-0.253215
0	0.0122697	-0.124844
0	0.250604	-0.137996
0	1.44934	0.292895
0	-0.377717	0.238387
0	0.959713	0.103172
0	-0.86129	-0.428344
0	-0.869045	-0.122599
0	0.924682	0.676913
0	-0.159905	-0.340632
0	0.554032	0.0755097
0	-0.330324	-0.575376
0	-3.65035	-0.688941
0	-1.3998	-0.581362
0	-0.0950458	-0.383373
0	-0.306745	0.179082
0	-0.414195	0.781701
0	-0.381743	0.00592814
0	-0.475848	0.336175
0	-1.039	-0.323031
0	0.618919	-0.266923
0	1.67152	0.145855
0	-1.50495	-0.98094
0	1.00462	0.148432
0	-1.0646	0.373653
0	0.818892	-0.132503
0	-0.726192	-0.0547567
0	-0.787778	-0.0435019
0	1.52489	0.067156
0	1.73299	0.686352
0	-2.61794	0.432955
0	-1.10703	0.697431
0	-0.17192	-0.569538
0	0.28229	0.629122
0	0.873624	0.361408
0	0.754447	-0.422058
0	-0.260294	0.308938
0	-1.7225	-0.129972
0	-0.779693	0.459823
0	-0.811102	0.0807691
0	-0.277643	-0.222777
0	1.16204	0.00351385
0	1.27535	0.226953
0	1.87954	0.363179
0	0.450593	0.144895
0	0.347893	0.332495
0	1.12707	-0.223388
0	1.00614	0.526035
0	0.529782	0.259539
0	1.20105	-0.25775
0	-1.28783	-0.0548419
0	1.06225	0.134564
0	-0.637859	0.308004
0	-0.590936	-0.461365
0	-0.191547	0.567333
0	1.50969	0.0369402
0	0.813143	-0.0452581
0	1.26275	-0.428764
0	-0.930701	-0.542471
0	-0.913064	-0.261295
0	0.338601	0.0594002
0	0.355261	0.388868
0	-0.0214823	-0.579081
0	0.960312	0.199532
0	-1.02266	0.0631902
0	1.18292	-0.0442587
0	-0.692225	0.485948
0	0.38098	-0.0174831
0	-1.45883	0.440881
0	0.680497	0.25909
0	0.769579	0.313663
0	0.609345	0.00517275
0	0.144757	0.281622
0	-1.83804	-0.428262
0	0.537663	-0.0337277
0	-2.3327	-0.465006
0	-1.38084	-0.387325
0	-1.13158	-0.0725267
0	-0.539373	0.755779
0	-0.513471	0.0408272
0	-0.226479	-0.22057
0	-0.755403	-0.0100582
0	0.751504	0.0567982
0	-0.0475685	-0.0602203
0	-0.46372	0.122961
0	2.98694	0.861978
0	-0.466535	0.230491
0	-1.38768	0.00606096
0	-0.201306	-0.302398
0	0.480915	0.454218
0	2.0877	0.305219
0	0.911419	0.192029
0	0.74966	0.143156
0	-0.0253159	0.113376
0	1.69086	0.449774
0	0.537366	0.414375
0	0.384691	0.331678
0	1.90433	0.20358
0	-0.334674	0.349393
0	0.868712	0.312523
0	-0.972984	-0.544491
0	-0.413435	-0.386892
0	-0.0179021	-0.152181
0	2.06478	0.328421
0	0.43334	0.439146
0	2.49213	0.594581
0	-2.18158	0.0826212
0	-0.197801	0.155252
0	0.926539	0.523903
0	0.105268	0.532878
0	-0.350623	-0.348559
0	-2.9783	-0.51246
0	0.572872	0.432916
0	0.0500575	0.0970755
0	-0.809166	0.285857
0	-1.38508	0.0801011
0	-0.22223	-0.166937
0	-1.63359	-0.305382
0	-1.18102	-0.483433
0	-0.86294	0.272406
0	-1.03806	0.403646
0	0.506635	0.101882
0	-0.979961	-0.178855
0	-0.733248	-0.352988
0	-0.452529	0.490564
0	0.948919	0.213517
0	-0.973635	0.0739291
0	-0.676753	-0.534885
0	1.22251	0.0960421
0	1.56732	-0.125634
0	1.20119	-0.187091
0	0.537926	-0.296045
0	-1.10636	0.21639
0	-0.821008	0.292597
0	-0.258214	0.379038
0	1.15872	0.745921
0	0.0603224	0.436328
0	0.463853	-0.348336
0	-1.84402	0.289652
0	0.887646	0.104251
0	-0.614503	0.237542
0	0.246464	0.207061
0	-2.48764	-0.340452
0	1.67161	0.454568
0	-1.00122	0.0579522
0	-0.70588	-0.956099
0	0.178111	0.392234
0	0.907897	0.331032
0	1.49342	0.454991
0	1.35102	0.129655
0	0.330004	0.115981
0	-0.177181	-0.607592
0	0.0678667	0.459272
0	0.438077	0.0212078
0	0.182371	0.208129
0	-0.69224	0.00974201
0	-0.377583	0.401969
0	-0.23752	-0.362806
0	0.13623	0.365857
0	-0.288223	-0.210196
0	-0.09611	0.463417
0	-0.218438	-0.720479
0	-0.631968	-0.233415
0	0.076405	-0.0335128
0	0.212247	0.45562
0	-1.46815	-0.0640844
0	-2.24725	0.0656269
0	-1.11052	0.395461
0	-0.854842	-0.555244
0	1.24698	0.1161
0	-2.24776	-0.0520294
0	-0.714552	0.403326
0	-0.219625	0.286016
0	-1.73494	-0.480414
0	0.585453	0.102007
0	1.14506	0.318867
0	1.96803	0.193559
0	0.884105	-0.892925
0	-1.20249	-0.0434782
0	-0.569864	0.0840219
0	-0.607324	-0.366168
0	0.38943	0.458507
0	-0.599702	0.658
0	1.51254	0.451585
0	0.563689	-0.0311549
0	1.72808	0.393131
0	0.533055	0.661869
0	0.110151	0.439189
0	0.22471	0.801706
0	1.36869	0.518192
0	-0.518285	-0.132913
0	2.12576	0.368137
0	1.65147	0.658246
0	0.763268	0.150454
0	0.042164	-1.23597
0	1.61754	0.720279
0	0.823842	-0.15435
0	-0.492607	-0.373225
0	-0.295595	0.222041
0	1.23532	-0.177746
0	-1.16224	-0.0948543
0	-2.39094	-0.62331
0	-1.19395	-0.792884
0	1.12518	0.609879
0	0.0108904	-0.233758
0	0.517314	-0.258377
0	-0.248164	-0.270401
0	0.480002	0.102135
0	0.0869266	0.160643
0	-0.373609	-0.181546
0	0.347029	-0.101498
0	-1.05304	-0.245679
0	1.6987	0.472676
0	-0.211902	0.595394
0	0.439451	0.0823459
0	0.451327	0.086233
0	0.677494	0.158534
0	1.08114	0.300281
0	0.255932	-0.0628877
0	0.256845	0.208044
0	0.945566	0.648298
0	1.13555	-0.0820698
0	0.0414678	-0.154355
0	0.0376231	0.131371
0	1.77598	-0.0369911
0	-0.285173	-0.0376334
0	-0.858527	-0.465049
0	0.815252	0.0530458
0	1.09468	0.589253
0	-3.304	-0.73585
0	0.502709	0.464504
0	0.308227	0.245106
0	1.11699	0.367106
0	-1.61048	0.41177
0	-0.865063	0.0072965
0	-1.083	0.243764
0	-0.435526	0.433519
0	-1.03855	-0.487115
0	-0.794756	-0.214108
0	0.874582	-0.0785405
0	1.62404	-0.480882
0	-0.286053	0.726141
0	-0.300504	0.200595
0	0.993252	0.388778
0	0.783709	0.620649
0	0.0724865	-0.458908
0	-1.4505	-0.436888
0	-1.42442	0.0696514
0	2.05187	0.454831
0	-0.785994	0.135029
0	0.597186	0.208568
0	2.06298	0.125388
0	0.151783	-0.10814
0	1.74535	0.476045
0	0.151133	0.156664
0	-0.504173	-0.441785
0	0.881409	-0.0659174
0	-1.49598	-0.0075678
0	-0.00454185	0.204848
0	0.382906	0.244194
0	-0.393749	0.326297
0	-1.80134	0.333879
0	0.296288	0.533243
0	-0.220941	0.80523
0	0.190598	0.137513
0	0.113754	-0.35815
0	-0.501974	0.0813128
0	0.632577	-0.0916484
0	0.300267	-0.0362012
0	1.32426	0.57886
0	1.58997	0.709261
0	0.979843	0.232325
0	0.609294	0.72902
0	-1.32901	0.213717
0	1.27441	-0.0623836
0	1.12266	0.302889
0	-0.215668	-0.154812
0	-1.92508	-0.167404
0	0.0234657	-0.0174719
0	0.466289	-0.0556575
0	-0.321545	-0.201326
0	-0.253736	0.496441
0	-0.501893	-0.0911023
0	-0.381694	-0.463471
0	1.17176	0.640037
0	-0.583636	-0.0912092
0	1.81174	0.290118
0	-0.844659	0.312736
0	-1.18156	0.52338
0	1.76428	0.206917
0	1.62809	-0.174158
0	0.555277	0.640476
0	0.27208	0.218131
0	1.06495	0.636392
0	0.924447	-0.176335
0	1.19027	0.498557
0	-1.21601	-0.296036
0	0.215667	0.0710211
0	2.02295	-0.314926
0	1.42283	0.725391
0	1.10603	-0.109017
0	0.954012	-0.0353856
0	0.279306	0.188393
0	0.528667	0.0564452
0	-2.14291	-0.441841
0	-0.600983	-0.201917
0	0.420917	0.313505
0	-0.278041	0.563379
0	-0.32262	0.179436
0	0.756202	-0.255191
0	1.96226	0.391661
0	-0.234736	0.384007
0	-0.179269	-0.407772
0	0.765034	0.0402867
0	0.676851	0.26841
0	0.709432	0.150796
0	-0.0925825	0.364364
0	1.42796	0.0147797
0	-2.66825	-1.01473
0	-0.348618	0.49156
0	0.311024	0.326699
0	0.157933	-0.314198
0	-0.420015	-0.205443
0	-1.37165	-0.474514
0	0.741405	0.268403
0	-0.45939	-0.0426149
0	0.994831	0.368364
0	0.431449	0.300014
0	0.939795	0.544221
0	-0.0476992	-0.18055
0	-1.32677	0.229919
0	-1.77222	-0.505749
0	-1.96401	0.363694
0	-0.54465	0.409559
0	2.04782	0.401807
0	0.245503	0.270704
0	0.425343	-0.271244
0	0.422436	0.265988
0	0.68115	-1.13185
0	0.316627	0.458292
0	-0.435357	-0.0915415
0	0.527567	-0.262914
0	-0.854081	-0.426754
0	-0.428718	-0.358125
0	-0.675222	-0.341747
0	0.791523	0.228387
0	0.3846	0.577765
0	0.0527794	0.0612632
0	-0.546298	-0.00167991
0	0.710519	-0.00316335
0	1.58674	0.574233
0	-1.94178	-0.545655
0	0.795567	0.247512
0	-1.87354	-0.375829
0	0.153669	-0.505434
0	0.387434	0.0837049
0	-0.831093	0.325437
0	0.550363	0.145704
0	-0.846542	-0.751928
0	0.48675	0.207462
0	-0.397962	-0.161847
0	0.207627	0.49375
0	-1.46451	-0.0390602
0	0.1141	0.135274
0	0.228604	-0.322962
0	0.520769	0.46186
0	0.493143	0.326693
0	-1.43593	-0.477024
0	-0.925894	-0.229405
0	0.524114	-0.386563
0	0.762011	0.17615
0	-0.01006	0.0170634
0	2.11602	0.079058
0	-2.59024	-0.356395
0	-0.0885308	0.352606
0	0.406034	-0.08054
0	1.84977	0.237051
0	0.372062	0.178287
0	0.325699	0.489634
0	0.113363	-0.331263
0	-1.19436	0.347338
0	-1.34949	-0.109444
0	-1.49607	0.333629
0	-0.0116131	-0.599759
0	0.760954	0.171582
0	-0.507808	-0.423851
0	-0.217077	-0.00531958
0	-0.473317	-0.765697
0	1.5789	0.193971
0	-0.779507	0.0097185
0	-0.246513	0.157395
0	0.921203	-0.262105
0	-0.246053	0.344214
0	0.745678	-0.070458
0	-1.33698	-0.36365
0	-0.9533	-0.50487
0	0.118968	-0.679236
0	0.151835	0.371696
0	0.0288816	0.187011
0	1.4281	0.320528
0	-0.635092	-0.272945
0	-0.257221	0.142807
0	-0.534363	0.493435
0	0.0310389	-0.438809
0	-0.868718	0.383669
0	1.00641	0.371455
0	-1.59743	-0.40237
0	-0.172165	-0.302265
0	0.847643	0.703114
0	1.25441	0.138084
0	-0.159015	0.197105
0	0.445018	0.502832
0	1.0551	0.0606503
0	-0.506733	-0.444799
0	0.540288	0.184388
0	0.371813	-0.0149004
0	0.207335	-0.0795122
0	-1.33967	-0.432701
0	0.26618	-0.617207
0	0.405766	0.228452
0	0.476854	0.395656
0	0.576657	0.0231224
0	-1.14805	0.0628661
0	1.08015	0.411556
0	1.13364	-0.595128
0	0.345289	-0.376389
0	0.776141	0.155571
0	-0.645513	-0.581582
0	0.32996	0.577336
0	-1.6548	-0.19099
0	-0.352157	0.0179999
0	-0.0761587	0.050986
0	-0.0287399	0.104381
0	0.151068	0.508042
0	-1.71333	0.715402
0	-0.664866	0.107867
0	0.46884	0.125956
0	0.108722	0.0588146
0	0.223444	-0.0597885
0	0.195417	-0.125527
0	-0.885796	0.00648003
0	-0.604447	-0.0243805
0	0.663314	-0.0699892
0	0.124887	-0.0567376
0	2.1544	0.208557
0	1.21704	0.218175
0	1.95708	0.427331
0	1.07678	0.298176
0	1.59302	0.472818
0	1.32154	0.407249
0	0.684956	0.239342
0	-0.337313	0.332462
0	0.649954	-0.302773
0	0.490557	0.0926539
0	-0.924165	0.400458
0	0.352457	-0.0641725
0	-0.495524	-0.285862
0	-1.99607	-0.136016
0	-1.73014	0.0817232
0	0.532968	0.678541
0	0.478277	-0.621212
0	0.460026	0.603525
0	0.296875	0.0851813
0	1.28512	0.545285
0	0.627467	-0.0449661
0	0.671302	0.148043
0	-1.21923	0.0475946
0	0.50196	-0.441617
0	-0.876319	-0.049794
0	-1.16422	-0.129206
0	-0.975116	-0.0602883
0	-0.321314	0.416515
0	-0.35065	-0.284084
0	-0.142346	0.0247801
0	-1.09255	-0.485269
0	-0.205827	-0.304124
0	-1.56154	0.042894
0	0.0780242	0.199146
0	-0.0137804	0.110616
0	0.611169	-0.0786763
0	1.45085	-0.226772
0	0.241672	0.128217
0	-2.63089	-0.168131
0	-0.104116	-0.207844
0	-0.642523	-0.903405
0	-0.776787	0.374973
0	-1.436	-0.201276
0	-1.20276	-0.618986
0	1.14239	0.252612
0	-0.969819	0.583412
0	-0.311796	-0.0577947
0	0.648559	0.46065
0	-0.717634	-0.713622
0	0.832535	0.265818
0	-0.182568	-0.456802
0	0.217826	0.370112
0	0.172902	0.140179
0	-1.33585	0.00873254
0	0.400296	0.499627
0	0.917854	-0.274959
0	-1.71831	-0.535619
0	-1.42684	-0.686536
0	0.260188	0.55161
0	0.454047	-0.386669
0	1.15181	0.22829
0	-0.0119465	0.548379
0	1.35655	0.437261
0	0.62327	0.133784
0	0.586064	0.541419
0	0.241569	0.43652
0	0.239434	0.412757
0	-2.57469	-0.37188
0	1.42404	-0.0258668
0	-2.43503	-0.335286
0	0.0595985	0.738729
0	-1.4037	0.371128
0	-0.313922	0.0317405
0	-1.77056	-0.565961
0	0.41555	0.0596505
0	0.260781	0.0348758
0	-0.959048	-0.0199997
0	0.581519	0.237327
0	-2.56545	0.323188
0	1.25996	0.465212
0	1.78027	0.269256
0	-0.624762	-0.0801221
0	-0.295031	0.378927
0	-0.970793	-0.0615213
0	-1.1202	-0.047682
0	-0.513554	0.213612
0	-2.26285	0.241181
0	-0.384043	-0.612198
0	-1.96033	-0.156418
0	0.226941	0.60015
0	0.430615	0.21822
0	-0.604659	0.0288621
0	-0.657539	-0.136324
0	1.23414	0.443818
0	0.410755	0.0239498
0	0.703356	0.0322849
0	1.45844	-0.0156073
0	-1.3157	0.357736
0	-0.569795	0.123584
0	-0.658169	-0.369552
0	-1.66211	-0.52165
0	-0.766912	0.0251175
0	-0.798682	0.689778
0	0.279611	0.076066
0	-0.882573	-0.670708
0	-0.713834	-0.114343
0	-1.5881	-0.331276
0	1.04607	0.243593
0	-1.06936	-0.77158
0	2.18732	0.924788
0	-1.55469	-0.522752
0	-0.546534	-0.145281
0	-0.0711054	0.0675999
0	-0.867997	0.465065
0	0.442427	-0.158916
0	2.26611	0.438907
0	-0.784572	-0.0942331
0	0.729948	0.251499
0	0.494536	0.0260849
0	1.13032	-0.465989
0	-0.811895	0.109992
0	1.12036	0.325321
0	0.0659586	0.146109
0	-1.05207	0.264026
0	0.0914677	0.242348
0	-0.63981	0.23009
0	0.164731	0.297125
0	1.16563	0.275034
0	0.678215	-0.0276495
0	-0.624219	-0.0217927
0	1.98851	0.74474
0	-1.08663	-0.377584
0	-0.464104	0.236132
0	-0.330878	-0.668052
0	-0.732584	0.386356
0	0.187116	0.550206
0	-0.087023	0.0446531
0	0.78676	0.104489
0	-1.8183	0.116538
0	0.886807	0.689423
0	-0.3936	0.163291
0	-0.870492	-0.0621946
0	-0.224758	-0.237252
0	0.332794	-0.0125032
0	0.348437	0.450612
0	0.9097	-0.103473
0	0.00162018	-0.389762
0	0.230305	-0.309525
0	2.33417	0.301246
0	1.12384	-0.124478
0	0.125848	-0.316681
0	0.820927	0.528548
0	-0.00530013	-0.672599
0	-0.942328	-1.13054
0	-1.72782	-0.586404
0	-1.2905	0.053631
0	0.217195	0.140976
0	1.02694	0.342312
0	-0.544964	0.240903
0	-0.29431	-0.168845
0	0.252185	0.14025
0	0.219849	0.000266643
0	-0.808396	-0.0754667
0	-0.967335	-0.017624
0	-0.65157	0.776602
0	-1.91382	-0.10353
0	-0.425233	0.316533
0	-1.10504	-0.417885
0	0.263847	0.387156
0	-1.66065	0.087509
0	1.08578	0.725144
0	1.54532	0.217422
0	1.73202	0.046332
0	0.494328	0.128169
0	-0.726721	0.0964539
0	-1.37157	0.114907
0	-1.25905	0.0829386
0	0.548347	0.231458
0	0.899336	0.321863
0	0.102616	-0.180405
0	0.646279	0.330407
0	-0.650972	-0.0748865
0	0.123621	0.0312748
0	0.309433	-0.38454
0	1.36961	-0.234523
0	-0.0275694	0.465201
0	-1.63807	-0.0225384
0	-0.458203	-0.749517
0	-0.977687	0.204081
0	0.337072	0.125248
0	-0.637313	0.21831
0	0.287222	-0.0975639
0	-0.656393	0.215348
0	-0.955275	-0.12321
0	1.15134	-0.18369
0	0.523192	0.160124
0	-0.977896	-0.214649
0	-0.312318	-0.169887
0	1.30017	0.265898
0	-0.207688	0.331048
0	0.134685	-0.23513
0	0.115909	0.0502365
0	-0.809601	-0.0989448
0	-0.322675	-0.34383
0	1.71585	0.279027
0	-0.768703	0.15689
0	-1.25622	-0.122309
0	1.03847	0.891827
0	-0.391568	0.323474
0	-0.977397	-0.59021
0	-0.926634	-0.0398338
0	0.507201	0.258183
0	2.32056	0.427056
0	0.357649	0.0558122
0	-0.0399307	-1.0952
0	0.0465408	0.528023
0	-1.27101	-0.559506
0	1.17979	-0.181782
0	-0.290662	0.195284
0	1.42244	-0.0105885
0	0.535944	0.108683
0	-0.0590063	-0.378444
0	0.101347	0.349674
0	0.71828	0.0447398
0	1.32095	0.32397
0	1.4403	0.30483
0	0.0678359	-0.0738297
0	0.0563208	0.41229
0	1.33969	0.223484
0	0.453288	-0.488883
0	1.49085	0.256244
0	1.20353	0.167142
0	0.102577	0.17048
0	-0.0974147	-0.249965
0	-0.192922	0.0385639
0	-1.03993	-0.289569
0	-2.10381	-0.640427
0	0.618744	0.0673947
0	0.367856	-0.45891
0	-1.59118	-0.547344
0	-0.246995	0.117037
0	1.34145	-0.0748907
0	-0.614765	-0.108437
0	0.0148736	-0.299289
0	-0.552015	-0.495577
0	0.282045	0.716314
0	0.208765	0.275207
0	0.026146	-0.160865
0	-1.48286	-0.0622917
0	0.808875	-0.124775
0	0.754788	0.09082
0	-1.0779	0.341897
0	0.392356	-0.281975
0	0.771659	-0.0209893
0	-1.22319	0.0306757
0	-1.42561	-0.118393
0	-0.795457	-0.4321
0	1.89988	0.32431
0	-0.691212	-0.753498
0	0.888117	0.103659
0	-0.0882273	0.305391
0	0.123269	0.0208775
0	1.0603	0.264804
0	1.4861	-0.26884
0	-1.33256	-0.535015
0	0.536583	0.511962
0	-0.675099	0.225444
0	1.28776	0.0769031
0	0.742751	-0.290911
0	-2.18916	0.0348537
0	-0.674678	0.638483
0	-0.206664	0.570485
0	-1.15563	0.243002
0	0.0521274	-0.188794
0	0.524366	0.291789
0	0.670175	0.289706
0	0.0784737	0.474533
0	0.276689	0.20703
0	0.593644	-0.147461
0	0.0971185	0.402963
0	0.883003	0.359802
0	-0.314152	-0.528288
0	0.315281	-0.0237603
0	0.183207	0.243979
0	-0.547698	0.300352
0	-1.01639	0.0816466
0	1.38726	0.612626
0	-0.649775	0.0536003
0	0.269733	0.180137
0	1.07104	0.393385
0	0.0466487	-0.340165
0	-0.100469	0.393086
0	0.778351	0.0589977
0	0.520641	0.126981
0	-1.01906	0.0813181
0	-0.238237	-0.167896
0	-1.33573	0.193947
0	0.22963	-0.265375
0	-0.117698	-0.127346
0	0.136313	0.450202
0	0.0373738	-0.0805421
0	-0.758546	-0.207196
0	-0.104511	0.474518
0	-0.185504	0.0489656
0	0.435936	0.244632
0	1.41501	0.491811
0	0.58803	0.227642
0	0.726125	0.539579
0	-0.880018	0.271098
0	-0.721894	0.440959
0	-0.682145	-0.370038
0	-0.0532582	0.495458
0	-0.317669	0.086967
0	-0.235833	-0.0581221
0	0.965595	0.576841
0	-0.350846	-0.225267
0	0.38743	0.056942
0	-0.766417	0.0703726
0	-0.33027	-0.093186
0	-0.684159	-0.573614
0	-0.27872	0.465455
0	0.865917	0.557496
0	-0.442139	0.00810349
0	-2.58277	-0.193724
0	-0.170124	-0.378311
0	-0.539855	-0.0678729
0	-0.639369	0.0585207
0	0.755157	0.344933
0	-0.302322	0.509756
0	0.178961	-0.000722645
0	1.68005	0.393948
0	0.6822	-0.270427
0	-0.169245	0.258119
0	0.226994	0.180796
0	0.0260569	-0.761736
0	1.65909	0.356416
0	0.634993	-0.0912746
0	0.14077	-0.352779
0	0.469675	0.677606
0	-0.056252	-0.334187
0	-2.31655	-0.655248
0	-1.04025	-0.190766
0	-1.93793	-0.0145162
0	-1.60725	-0.335935
0	-0.178705	0.230718
0	-0.562946	-0.651855
0	-0.904471	-0.0450671
0	0.103736	-0.3568
0	-1.41062	-0.913518
0	-0.871901	0.014063
0	1.44681	0.542126
0	-0.64666	0.513014
0	-0.090347	0.495164
0	0.987572	0.72151
0	-1.05782	-0.128259
0	-1.24441	-0.444986
0	0.100184	-0.00323587
0	-1.81771	-0.0428163
0	1.67037	0.504624
0	-2.80369	-0.917822
0	1.02829	0.293121
0	-0.149938	0.0149815
0	-1.97062	-0.0200571
0	-1.13772	0.738627
0	-0.798889	0.44622
0	-0.697424	0.182383
0	0.615567	0.447041
0	0.462955	-0.506243
0	1.05428	0.170699
0	1.28653	0.131341
0	-1.50593	0.214266
0	-0.419746	-0.194276
0	-0.317642	0.0309398
0	0.778657	-0.260196
0	-0.768862	0.23213
0	0.5635	0.472651
0	0.695915	0.203439
0	-0.351026	0.333484
0	0.0911938	-0.14174
0	0.467775	0.154227
0	-0.726762	0.256526
0	-0.196752	0.579415
0	0.338912	-0.235821
0	0.830216	0.644565
0	0.7269	0.818813
0	-0.0732079	0.0651996
0	0.253425	-0.233551
0	-0.777732	-0.264484
0	0.509786	0.0335547
0	0.00332632	0.625522
0	-0.527603	0.573053
0	-2.76034	-0.304898
0	-0.798923	0.00544763
0	0.720173	0.527604
0	-0.333809	-0.317738
0	-0.347812	-0.518799
0	-1.60558	0.580631
0	0.484419	0.586099
0	0.0555566	-0.193419
0	0.488528	0.199411
0	0.18462	-0.124068
0	-0.155689	-0.121014
0	-0.483255	0.344453
0	0.234788	-0.771726
0	-1.06396	-0.35157
0	0.946454	0.620745
0	-0.339749	0.200158
0	-0.0317045	-0.0195298
0	0.652326	-0.213829
0	1.06962	0.317648
0	-0.321627	0.300939
0	-0.287216	-0.57241
0	1.52451	0.322009
0	-0.751126	-0.138762
0	1.77308	0.334598
0	0.781418	0.656065
0	-0.273979	-0.135117
0	-1.196	-0.0758278
0	1.96606	0.000133519
0	-0.806778	0.326734
0	-0.521843	0.114965
0	0.722931	0.0157279
0	-0.0216078	-0.605609
0	-0.606502	0.217102
0	-1.95749	0.567113
0	-0.241995	0.0361914
0	2.35	0.355354
0	-0.616113	-0.370882
0	1.02617	0.479315
0	1.04264	0.565405
0	-0.332723	0.0101534
0	1.26563	0.282062
0	-0.973096	-0.512322
0	1.26217	0.159689
0	-0.727094	0.0923227
0	1.8534	0.297428
0	0.781528	0.529379
0	0.267524	0.324483
0	-1.72543	0.428853
0	0.383919	0.533851
0	0.249979	-0.0836814
0	0.508295	-0.0602205
0	-0.167881	-0.237855
0	1.19682	0.300672
0	-1.15057	-0.106949
0	0.449147	-0.00151187
0	0.509601	0.557718
0	-0.241595	-0.0599187
0	1.10917	0.405762
0	-0.203466	0.0400529
0	-0.0415316	0.168675
0	1.96563	0.0904072
0	-0.276354	-0.453787
0	-1.98027	-0.349011
0	1.34039	0.229463
0	-0.602064	-0.144716
0	-1.39066	-0.264238
0	-0.39337	0.0822714
0	-0.241959	-0.581395
0	1.96921	0.789447
0	0.00915666	-0.00732368
0	-0.629448	0.0715646
0	-0.400744	0.0251183
0	1.84457	-0.0422164
0	-0.108514	0.344668
0	1.42188	0.18131
0	0.203976	0.163474
0	0.809368	-0.218865
0	-0.255273	-0.165919
0	-1.25112	-0.328279
0	0.175751	-0.111083
0	2.45804	0.567011
0	-0.618008	0.19463
0	-1.52881	-0.754647
0	-0.48556	0.0648294
0	-0.0586297	-0.153602
0	-0.993307	0.516148
0	-1.30906	-0.865487
0	-1.36108	0.0937585
0	-0.940104	-0.207668
0	0.535803	-0.132814
0	0.143841	0.293506
0	-0.215376	0.713872
0	1.06978	-0.0598391
0	1.04292	-0.328906
0	-1.96978	-0.621235
0	-0.258405	0.783426
0	0.40804	0.449105
0	-1.34337	-0.157621
0	0.205023	-0.110258
0	-0.289585	0.30913
0	-0.684734	-0.171613
0	0.705953	-0.334934
0	0.769659	-0.036955
0	-0.239281	-0.062922
0	0.311953	0.126425
0	0.770935	0.429544
0	-1.75752	-0.596804
0	0.118944	0.657352
0	0.171097	-0.394364
0	0.0290753	0.048024
0	-1.25668	0.219132
0	-0.671766	0.2943
0	0.480804	-0.689636
0	0.122462	-0.100617
0	1.72228	0.352304
0	1.2789	0.61397
0	-0.0676772	-0.150321
0	0.790348	0.00905183
0	-0.698172	0.136224
0	-0.969122	0.145452
0	0.401385	0.625492
0	-0.723147	-0.0430856
0	0.414598	0.178563
0	-0.375308	-0.103808
0	1.42378	0.455107
0	-1.91268	0.0897066
0	0.976017	-0.74496
0	-0.523992	0.318461
0	-0.272299	-0.141589
0	0.385578	0.0792371
0	0.21335	0.323789
0	-0.175132	-0.117788
0	0.58912	0.158061
0	1.28393	0.593494
0	-0.898911	-0.131791
0	-0.478348	0.0524059
0	-0.227889	-0.0020956
0	-0.959286	-0.173499
0	-0.267754	-0.08965
0	1.97641	0.651846
0	-0.428827	-0.299074
0	1.57772	0.0466196
0	0.0436628	0.106793
0	-0.430406	-0.958528
0	-0.630958	0.101902
0	-0.560372	-0.262299
0	1.15007	0.63711
0	0.456291	0.441025
0	1.23813	0.217078
0	-1.80213	-0.137906
0	1.00719	0.127077
0	-0.719634	0.275922
0	-1.04267	0.155946
0	1.32209	-0.293929
0	-1.16224	-0.131197
0	-1.06457	0.41221
0	-0.536863	0.255118
0	0.764971	-0.375268
0	0.887586	-0.00248019
0	-0.168098	0.0127532
0	0.496037	-0.73478
0	0.055971	0.310733
0	1.35823	0.445947
0	-0.396991	-0.150055
0	1.78188	-0.223703
0	-0.970168	0.215665
0	0.24095	0.440719
0	1.04065	-0.0933538
0	0.0737957	0.0138036
0	-0.466155	0.541999
0	0.199536	0.508529
0	-0.322528	-0.177765
0	0.562903	0.409818
0	-1.15679	0.304303
0	-0.408993	0.00640444
0	-0.217226	-0.0723612
0	0.601388	0.252685
0	0.0959777	-0.332967
0	0.192107	-0.18392
0	0.28706	-0.337245
0	0.827318	0.293604
0	0.865968	0.674186
0	1.17465	0.069446
0	-0.72741	-0.124934
0	0.641926	0.479993
0	0.0775866	-0.216163
0	0.445184	-0.117876
0	-0.06157	-0.216928
0	0.043125	0.164474
0	-1.22599	-0.172998
0	-0.209475	0.264717
0	-0.000942254	-0.0157948
0	-0.709489	-0.0154663
0	-0.812643	0.452978
0	1.14982	0.46846
0	1.12017	-0.366081
0	1.14263	0.144736
0	0.0775434	-0.0161505
0	-3.04133	-0.168361
0	-0.823401	-0.735667
0	-1.07359	-0.712874
0	0.746799	0.19925
0	-0.312729	-0.399669
0	0.544177	0.336912
0	0.175681	0.354086
0	-1.01079	-0.209065
0	-1.65435	0.802714
0	0.434625	-0.309873
0	-0.835067	-1.16392
0	-0.23654	0.111366
0	-1.36565	-0.703094
0	0.17687	0.481529
0	-0.667088	-0.290159
0	-0.305	-0.615665
0	2.27126	0.59035
0	-0.344661	0.592631
0	0.170517	-0.481242
0	-0.380269	-0.0802437
0	0.429192	0.238268
0	0.52213	0.232555
0	2.49967	0.2229
0	-1.74658	-0.270202
0	0.223443	0.371906
0	0.537922	-0.602189
0	1.05757	0.234549
0	1.44788	0.924968
0	-0.697249	0.554868
0	-0.309672	-0.623285
0	0.121309	0.489666
0	0.405848	-0.295605
0	-0.806151	-0.0194984
0	0.603316	0.254515
0	-0.905487	0.215336
0	0.873825	0.0519301
0	1.53935	0.00118989
0	-0.79816	0.124439
0	0.265104	0.466835
0	-1.14717	-0.628991
0	-0.16445	0.450587
0	0.783216	-0.0719919
0	-0.31594	0.608299
0	-0.582494	-0.105913
0	-0.531414	-0.64632
0	0.855548	0.369062
0	1.26491	0.399276
0	-1.74377	-0.299264
0	-2.50007	-0.198581
0	0.0263401	0.410341
0	-2.45748	-0.120317
0	0.130163	-0.204951
0	2.03292	0.997196
0	0.026734	0.255759
0	1.17393	-0.180348
0	0.595439	0.281036
0	1.19691	0.360631
0	0.562391	0.566954
0	0.308999	0.096018
0	0.931492	0.0165777
0	0.0965845	-0.222956
0	-3.34342	-0.13495
0	-0.89332	-0.676533
0	-1.50225	-0.252629
0	0.547972	0.199305
0	0.356162	-0.00869711
0	-0.864418	0.244834
0	-0.236395	0.199095
0	-0.0100804	-0.604486
0	1.11566	0.10708
0	1.50673	0.504221
0	-0.76765	0.43444
0	0.666462	0.310057
0	0.332272	0.7151
0	1.21833	0.599787
0	-0.00231148	-0.0433969
0	0.739131	-0.354452
0	0.887632	0.389475
0	0.840936	0.465767
0	0.860963	-0.366571
0	0.567666	0.0437574
0	-0.0611352	0.33613
0	-0.973584	-0.582048
0	1.57627	0.192112
0	0.0168788	0.193647
0	-1.32111	-0.531172
0	0.968138	0.139875
0	-0.101733	0.502978
0	-1.09088	-0.125655
0	1.6513	-0.0535425
0	0.196505	-0.551986
0	-1.44762	-0.637396
0	0.776125	0.428902
0	0.273119	0.310225
0	-0.785895	-0.186824
0	0.741063	0.23013
0	-0.627379	0.377138
0	-1.422	0.388844
0	0.596617	0.0984812
0	0.652961	0.292669
0	-2.35229	0.760751
0	0.142827	0.459029
0	-0.638902	-0.0190145
0	-0.760154	0.210517
0	-1.15885	0.246923
0	-0.358967	0.16979
0	0.822905	0.439546
0	1.74003	0.380317
0	0.00396407	0.366786
0	0.678161	0.247872
0	-0.777226	-0.0237194
0	0.751594	0.478094
0	-0.169212	0.29222
0	-0.258578	0.326439
0	0.359498	0.608324
0	-0.145965	-0.415777
0	2.16414	0.245962
0	1.23983	0.252168
0	0.0874366	0.491941
0	1.23131	-0.353381
0	0.335562	0.361632
0	-1.77206	-0.348664
0	0.279604	-0.0108593
0	-0.403773	0.124143
0	-0.150687	0.143691
0	1.37657	0.0765572
0	-0.283314	0.147489
0	-0.219199	0.0982394
0	-0.614566	-0.228383
0	-1.0683	0.22005
0	0.0775467	-0.0976251
0	-0.230988	0.228387
0	-0.667279	0.0298059
0	-0.752648	-0.0919954
0	0.4	-0.261356
0	0.0324262	-0.34126
0	0.629763	0.131352
0	-0.221959	0.142733
0	2.05408	0.535874
0	-0.0329358	-0.320132
0	0.131888	-0.074002
0	0.388369	-0.0172376
0	0.361789	0.375625
0	-1.69167	0.0317467
0	-0.918984	-0.381306
0	0.800185	0.335429
0	1.46708	0.461078
0	-0.501136	-0.519239
0	0.93074	-0.105299
0	-0.451654	-0.833416
0	-0.247029	0.345923
0	1.61336	0.615661
0	0.196194	0.00710253
0	-1.68771	-0.0747801
0	0.56233	0.36671
0	-0.262026	-0.106741
0	-1.28272	0.355115
0	-0.697703	-0.220475
0	-1.2249	-0.207269
0	0.99612	-0.529738
0	-0.874144	-0.528499
0	-0.138564	0.365661
0	0.864213	0.0958615
0	1.80918	0.328444
0	-0.232261	-0.274553
0	-0.114811	0.522886
0	1.65675	0.569167
0	0.671476	0.686456
0	-0.498661	0.471296
0	-0.557927	-0.0522123
0	0.298889	-0.610558
0	-0.425755	0.284356
0	0.197276	-0.355534
0	0.585563	0.216469
0	3.21583	0.142536
0	1.45945	0.445967
0	1.50391	0.245396
0	-1.2188	-0.264
0	-0.813605	-0.124999
0	-0.591872	0.148284
0	1.63052	0.353596
0	0.543799	0.437625
0	1.14462	-0.0819702
0	0.196273	0.473901
0	-0.757901	0.24824
0	0.887486	0.0320011
0	-1.54969	-0.388251
0	-0.41157	0.045825
0	-0.288737	-0.199671
0	0.464216	-0.259625
0	1.06646	-0.0586125
0	1.36888	-0.169798
0	-1.47349	0.268384
0	-1.22862	-0.495641
0	0.385521	-0.388699
0	-1.01158	-0.807239
0	0.278603	0.392642
0	-2.18956	-0.594039
0	-0.167635	0.421046
0	-0.760261	0.706375
0	-0.722693	0.436189
0	-0.182884	-0.14173
0	-0.0414868	-0.309155
0	-0.101318	0.201755
0	0.699697	0.572532
0	-0.571393	0.0651699
0	0.682592	0.322525
0	-0.790452	-0.345603
0	1.32704	0.515209
0	0.64688	-0.208077
0	-0.231371	-0.458872
0	-0.859396	-0.517437
0	-1.55429	-1.01948
0	0.761407	-0.144673
0	0.633431	0.0224224
0	0.0137801	0.114174
0	-0.656317	0.0749578
0	-0.720511	0.208239
0	0.782983	0.584776
0	0.502995	-0.152402
0	0.747561	0.266958
0	-0.99296	-0.357182
0	0.213912	0.435292
0	-0.737019	0.151694
0	-0.572915	-0.0525108
0	-2.28033	-0.333039
0	-0.161235	-0.373432
0	-1.30343	-0.123683
0	0.505178	-0.308195
0	-0.239949	0.210361
0	-1.4172	-0.340004
0	0.248212	-0.0139105
0	0.682114	-0.0191079
0	0.0928641	-0.309171
0	0.713783	0.0537051
0	-1.8278	-0.820787
0	-1.1079	-0.139963
0	0.601109	0.33359
0	0.323713	0.591498
0	-0.662967	-0.521258
0	-0.802447	0.0765909
0	-0.18567	0.0249669
0	2.16006	0.29185
0	-0.436907	0.351601
0	0.848059	0.309128
0	-0.546425	0.482189
0	-0.138696	0.0329604
0	1.95555	-0.115175
0	1.51425	0.285487
0	0.186592	-0.518652
0	0.759981	0.277058
0	-0.523618	0.201554
0	0.210108	0.190154
0	0.340957	0.130248
0	-0.893285	-0.0804298
0	0.41698	-0.00175873
0	0.658485	-0.0886865
0	-0.479551	0.0428948
0	-0.958105	0.382073
0	-1.23093	-1.1292
0	-0.680561	0.0343821
0	-1.63925	0.400699
0	0.151082	0.393365
0	0.0607299	-0.0630584
0	0.643008	0.213091
0	0.418255	0.369399
0	-0.798902	0.281853
0	-1.90162	-0.380538
0	0.598204	-0.0915213
0	0.02277	0.280859
0	1.01311	0.463952
0	0.786814	0.473733
0	-0.0819865	-0.498564
0	-0.185101	-0.168632
0	0.136383	0.56001
0	-0.868261	-0.249766
0	0.418119	0.0931415
0	-0.14822	0.101082
0	-0.191314	0.539337
0	-2.47724	-0.668693
0	0.970993	0.487809
0	0.277662	0.590207
0	-0.569584	0.233951
0	0.919392	0.243243
0	-0.692505	0.0427089
0	-0.927008	-0.681075
0	0.91271	-0.2715
0	-1.72543	-0.693059
0	0.141659	0.0381965
0	1.2055	-0.0215521
0	0.441767	0.238191
0	0.412997	-0.0579188
0	0.8714	0.208652
0	-0.0735002	0.37529
0	2.09652	-0.00247276
0	-0.115863	-0.305767
0	0.829254	-0.20216
0	0.329679	-0.192204
0	-1.94089	-0.267381
0	-1.48683	-0.232018
0	0.816571	0.378217
0	-0.562709	0.21343
0	-0.364618	-0.330997
0	-0.896749	-0.241597
0	0.418869	-0.0623356
0	0.694305	0.0833526
0	-0.560429	0.0159942
0	-0.796062	0.434221
0	-1.3044	-0.5105
0	-0.132028	0.144261
0	-0.276669	0.143783
0	-0.121343	0.0371788
0	0.581101	0.229193
0	-0.887181	-0.057464
0	-2.00705	0.110575
0	2.42867	0.358894
0	-1.09798	0.0593428
0	0.795105	0.348702
0	1.69172	0.722432
0	0.178734	0.527183
0	-1.10179	-0.690912
0	-0.819109	0.671059
0	-0.0869849	0.405866
0	-1.07856	-0.148551
0	-0.0665285	0.471277
0	1.77344	0.33142
0	1.28043	0.534413
0	0.623543	-0.107328
0	-0.383231	0.390211
0	0.971192	0.297276
0	-1.94824	0.105401
0	0.205878	0.0850751
0	-0.126889	-0.30299
0	0.283069	0.222822
0	0.225852	0.680869
0	0.315727	-0.0853904
0	1.21797	-0.0382097
0	2.09157	0.689783
0	0.603249	0.107431
0	-0.756256	-0.316775
0	-0.766569	0.179452
0	-0.143262	0.125496
0	0.501759	-0.198988
0	0.541446	0.023509
0	-0.152701	-0.64261
0	-0.175766	0.0923704
0	-0.326094	-0.165924
0	-0.713958	0.58891
0	-0.849317	-0.154826
0	0.347901	0.165774
0	0.734661	0.116437
0	-0.646928	0.269355
0	0.245637	0.196444
0	0.532102	-0.621999
0	-0.759552	-0.442201
0	-0.371829	0.52734
0	-0.134242	0.143859
0	-0.660896	-0.161821
0	-0.349136	0.233143
0	0.473115	0.502212
0	0.0116521	-0.241043
0	1.04223	0.252262
0	-1.60396	0.0997967
0	-2.43645	0.0250719
0	0.411473	-0.187818
0	-0.570493	-0.255024
0	1.5097	0.128447
0	1.37137	0.293975
0	-2.19279	0.643637
0	-0.602289	-0.398526
0	-1.08851	-0.409039
0	-1.1408	-0.0368914
0	-1.39115	-0.0245393
0	-0.182256	-0.33845
0	-0.390911	0.371387
0	2.04356	0.838993
0	0.358756	0.375408
0	-0.338215	-0.386457
0	-0.699683	-0.0422146
0	-0.513103	0.0219466
0	-1.10624	0.337283
0	0.55022	0.147287
0	0.61306	-0.0709111
0	0.231405	-0.316895
0	-0.197399	-0.144132
0	1.49198	0.326713
0	-0.412763	0.201324
0	1.86438	0.506644
0	-0.071735	-1.02328
0	0.0508827	0.145172
0	-0.638254	-0.338085
0	-0.169918	0.280184
0	1.52819	0.842493
0	-0.319682	0.023785
0	-2.42782	-0.197434
0	0.977544	0.243903
0	0.0879631	0.0417294
0	1.43751	0.138987
0	0.469862	0.393175
0	-2.45498	-0.177515
0	1.59405	0.206724
0	-0.59588	0.0266175
0	0.24021	0.357087
0	0.565244	0.32097
0	0.162662	-0.600237
0	-1.34165	-0.583913
0	0.833325	-0.0235809
0	-0.0120406	0.609692
0	-0.156496	0.0582509
0	-0.315737	-0.260539
0	0.554816	0.646346
0	0.897102	0.0397885
0	0.505862	-0.0301751
0	-0.635436	-0.554858
0	0.563425	0.53536
0	0.176996	-0.612645
0	1.06078	0.319173
0	0.263075	0.449925
0	0.0983253	0.145568
0	1.99423	1.14024
0	-0.337587	0.45412
0	0.120122	0.0217741
0	-1.6761	-0.404057
0	0.952917	0.10343
0	-1.24059	-0.188629
0	-0.736827	-0.396474
0	-0.298503	-0.182273
0	1.03188	0.202049
0	1.216	0.313503
0	0.0623316	0.128912
0	0.54527	-0.0342701
0	-0.335759	0.804142
0	2.39811	0.221297
0	0.452726	0.237535
0	1.68243	0.269179
0	0.701993	0.235446
0	0.0348707	-0.225713
0	1.17073	0.559137
0	0.305403	0.690916
0	0.518948	-0.125883
0	1.13986	0.311183
0	-0.323545	-0.52891
0	0.540277	-0.355817
0	1.88863	0.247697
0	0.459542	0.191657
0	1.34786	0.421107
0	-1.1112	-0.248936
0	1.82219	0.787848
0	-0.962974	-0.142975
0	-0.119824	0.0506246
0	-1.18114	-0.148764
0	1.66206	0.128307
0	0.441077	-0.410374
0	0.125328	-0.0494876
0	-1.04266	0.269941
0	0.795681	0.251807
0	-1.13798	-0.146736
0	0.0678865	-0.565704
0	-0.567734	0.0281825
0	-0.651385	0.211341
0	-0.0293232	-0.109013
0	-0.0347291	0.170735
0	0.464991	0.338698
0	1.54464	-0.0517657
0	-0.22912	0.38775
0	-0.193573	-0.403783
0	0.0804107	-0.337142
0	-0.897601	0.150707
0	-1.09543	-0.535856
0	0.260192	0.0399766
0	-0.271262	0.676155
0	1.74501	0.491204
0	0.627346	-0.151468
0	1.15302	0.196295
0	1.37776	0.498479
0	0.469062	0.234385
0	1.37391	0.343068
0	-1.13887	0.00864941
0	0.603512	0.365436
0	2.20206	0.991396
0	1.19108	-0.0288406
0	-1.16735	0.230718
0	0.960537	0.25361
0	2.08558	0.404509
0	-1.33957	-0.0212488
0	-1.17401	0.134148
0	-0.208047	0.0159952
0	0.517014	0.170769
0	-1.08723	0.0192075
0	0.684481	0.441599
0	0.395713	0.120644
0	0.240954	0.0734625
0	0.428547	0.232047
0	-1.22507	-0.387935
0	0.278054	0.374055
0	1.6036	0.0583929
0	-0.0840353	0.122397
0	-1.72589	-0.353355
0	-0.0166285	-0.434149
0	-0.252674	0.0770392
0	-0.936565	0.708216
0	2.34642	0.328367
0	-1.95772	-0.271833
0	-0.763439	0.318319
0	0.723704	0.534938
0	0.390952	0.084387
0	-0.164812	-0.430032
0	1.35543	0.264851
0	0.0928209	0.379673
0	0.8771	0.263677
0	-0.884378	-0.360176
0	-0.557293	0.0639649
0	0.145599	-0.299804
0	0.878005	-0.336839
0	-2.93066	-1.19273
0	0.969148	0.477371
0	0.356368	-0.0796393
0	1.76505	0.0583277
0	-0.442165	-0.0514439
0	-1.51817	-0.142102
0	-0.727818	-0.253617
0	1.56362	0.346079
0	-1.14733	-0.0595207
0	-0.810605	0.572573
0	-1.33953	-0.0704905
0	1.32391	-0.0780503
0	1.792	0.304223
0	0.0019261	-0.231375
0	0.20199	0.423871
0	-1.1226	-0.243132
0	-0.346517	-0.21006
0	-0.850924	0.756886
0	0.309724	0.299934
0	0.36785	0.0887724
0	-0.834237	-0.843876
0	-1.82883	-0.0064162
0	0.0854831	-0.657345
0	-0.654462	0.323758
0	-0.180754	-0.499606
0	1.38777	0.205989
0	-0.640079	0.0233181
0	1.28482	0.128782
0	-0.763214	-0.252763
0	1.30303	0.116186
0	-0.893774	0.04175
0	1.13275	0.392564
0	0.578618	-0.0578113
0	0.689771	-0.310548
0	-0.491417	-0.260891
0	-0.783348	0.0864793
0	1.15972	-0.115385
0	1.33799	-0.0769598
0	0.617008	0.539659
0	-1.02981	-0.565772
0	0.0391567	0.014535
0	-0.727831	-0.188705
0	0.568406	0.545089
0	0.177588	0.312396
0	1.51791	0.473679
0	-1.03983	-0.260669
0	-0.235153	0.287782
0	0.212201	0.31251
0	-0.136947	-0.00113868
0	-0.347155	-0.388076
0	-0.527197	-0.870997
0	0.210417	-0.303443
0	1.08835	0.407622
0	0.132335	0.296325
0	-0.734373	-0.00178601
0	-1.32128	0.345527
0	1.71266	0.419235
0	-0.142211	0.0646157
0	0.029363	-0.497237
0	0.595917	0.222906
0	1.29414	-0.491144
0	1.2611	0.0356006
0	0.49778	0.503309
0	0.0795586	0.173395
0	0.863501	0.552134
0	-0.738584	-0.20094
0	0.51103	0.599166
0	0.593235	-0.0252082
0	-0.680775	-0.187742
0	0.181759	0.523189
0	0.80127	0.263305
0	0.467104	0.458603
0	-0.292024	0.50528
0	0.535278	-0.209249
0	0.106488	0.497505
0	-1.37654	-0.193987
0	-0.378228	0.555949
0	0.588668	-0.439867
0	-0.603446	0.0311739
0	-1.14787	-0.200042
0	-0.37487	0.25406
0	0.0630259	0.13531
0	0.535444	-0.43949
0	-0.6246	-0.209184
0	0.389675	-0.270532
0	-0.48704	0.272915
0	0.132406	0.372831
0	-0.0789596	0.237332
0	1.1036	0.411898
0	1.04123	0.706872
0	-2.53584	-0.799625
0	0.339996	0.0822461
0	-0.72411	0.0799338
0	-0.456668	-0.408531
0	-3.10777	0.0329249
0	-0.678969	0.0794213
0	0.303898	0.231497
0	0.127255	0.495499
0	0.621795	0.593642
0	-0.387809	-0.329142
0	0.408467	-0.0619492
0	-1.08072	-0.0216803
0	0.789475	0.374802
0	-0.928294	0.140981
0	0.152174	0.236629
0	0.302379	0.070676
0	0.69426	0.138971
0	-1.5568	-0.636806
0	-0.504422	-0.227591
0	-1.24132	0.016984
0	1.17599	0.177889
0	0.403198	0.377258
0	0.273588	-0.270629
0	-0.153454	-0.050769
0	-0.315604	0.257024
0	0.159541	0.262732
0	-1.2096	-0.222142
0	-1.14046	0.0350383
0	-0.541991	0.0488012
0	-0.325296	-0.199181
0	-0.169202	0.078624
0	-0.633825	0.695321
0	-1.7162	-0.469736
0	1.89474	0.408196
0	-2.53404	-0.94334
0	-0.843547	0.0418344
0	-1.00826	0.203037
0	0.0937195	0.2531
0	1.39242	0.0859639
0	-0.245541	0.563905
0	-0.0974744	0.717685
0	0.67706	-0.0231506
0	-0.880279	-0.379913
0	0.14017	0.259107
0	-1.83092	0.459873
0	0.361995	0.251834
0	-2.23823	-0.217732
0	-1.97204	-0.333477
0	1.03826	0.210922
0	-0.858497	-0.0418464
0	0.0783093	-0.245879
0	-0.324091	0.0967788
0	-0.328747	0.0685423
0	-0.367466	0.444387
0	1.18793	0.421899
0	-0.393314	-0.466848
0	0.0569638	0.235212
0	-0.889769	0.259845
0	1.05987	0.0553924
0	1.52622	0.695084
0	-0.50889	0.917871
0	1.24964	-0.0381173
0	-0.936245	-0.0727909
0	0.939359	-0.484511
0	0.272098	0.521009
0	-0.728195	0.405254
0	1.50507	0.280183
0	0.630976	-0.145732
0	0.798964	0.327206
0	0.607594	0.199944
0	0.547328	0.484991
0	-1.09907	0.365699
0	-0.608773	0.282059
0	0.338894	-0.284047
0	0.335075	0.0520588
0	0.0850904	-0.128124
0	2.02229	0.326101
0	-1.4962	-0.262386
0	-0.123949	-0.0921711
0	0.387782	0.0519687
0	-0.0467672	-0.0267046
0	1.29988	-0.409277
0	0.431185	0.0724902
0	0.0666829	0.157965
0	0.579616	0.46214
0	-0.178902	0.0127392
0	-0.468215	-0.76758
0	-0.278665	-0.339565
0	-0.0661617	0.380231
0	0.173835	0.00391388
0	-0.895404	-0.559354
0	-0.577948	0.432737
0	-1.12839	0.628592
0	-0.396651	-0.620431
0	1.04337	0.506222
0	0.679298	0.091133
0	-0.662737	0.270287
0	1.05203	0.672587
0	-0.17021	-0.0326391
0	0.345883	0.100805
0	1.2702	0.469019
0	1.76197	0.244494
0	0.248553	0.589623
[truncated: 20,107 more rows]

## Sheet: Figure 8d
Distributions of the g-factor derived from cognitive tests via ESEM and predicted from all MRI modalities stacked.
Fold	Observed g-factor	Predicted g-factor
0	0.768846	0.162417
0	-0.263681	-0.115964
0	-1.3262	-1.21212
0	0.190673	-0.634718
0	0.961945	-0.132058
0	-0.181116	-0.825324
0	-0.527469	-0.582889
0	-1.46287	-0.876154
0	-0.475808	0.428607
0	-2.73035	-0.888503
0	0.613641	-0.427307
0	-1.49931	0.0751644
0	0.733688	-0.247958
0	0.822798	0.565485
0	1.24501	-0.510776
0	-0.517468	0.060034
0	-0.281437	-0.887462
0	0.281079	0.100006
0	-0.631149	-0.656184
0	-1.06716	-0.67777
0	0.526283	0.896198
0	0.999856	-0.298574
0	-0.758192	-0.323111
0	1.72452	-0.750722
0	1.48983	0.332302
0	-0.431295	-0.0658141
0	-1.70084	0.585681
0	-0.833999	-0.18958
0	0.399322	0.0104689
0	-0.0887415	0.270717
0	-0.881112	-0.587377
0	-1.3637	0.0213313
0	0.691324	0.110815
0	-1.69256	-1.2021
0	0.627423	-0.0785552
0	0.192403	0.836896
0	-0.0368536	0.14308
0	-0.702262	0.60294
0	1.06763	-0.490774
0	1.6634	0.856666
0	-1.21351	-0.0290539
0	0.293869	-0.279966
0	0.41009	0.284937
0	-1.22944	-0.485705
0	1.20617	0.645461
0	0.0787618	0.498125
0	-0.316783	-0.0117811
0	1.78909	0.362605
0	-0.913339	-0.438667
0	0.700048	-0.476859
0	0.914921	-0.125082
0	0.390848	-0.374147
0	-0.542739	1.0368
0	0.909349	0.101856
0	1.13783	-0.173952
0	0.486717	0.842658
0	-0.316465	0.832695
0	0.466668	0.334991
0	-1.30963	-0.301699
0	0.323996	0.462448
0	0.908739	-0.464678
0	-0.46594	-0.365792
0	-0.719781	-0.996659
0	0.756337	-0.0763938
0	1.23185	0.736817
0	-1.06281	-0.329129
0	-0.244729	-0.211757
0	0.860587	-0.461642
0	0.143478	-0.027582
0	0.474742	-0.0914456
0	0.133238	-0.191238
0	1.01476	0.156989
0	0.576972	-0.0775212
0	-0.234114	0.838084
0	2.69909	0.608759
0	0.962763	0.0177661
0	0.850587	0.249934
0	1.72415	-0.46228
0	0.537736	0.528028
0	-0.422857	0.0873324
0	0.524347	0.430915
0	0.154325	-0.0241905
0	-0.0623377	0.788427
0	0.664133	0.3931
0	1.2094	-0.0663801
0	-0.781118	-0.404912
0	-0.284526	-0.372511
0	0.105739	0.469386
0	-0.229261	-0.679131
0	-0.353571	0.350276
0	-1.27938	-1.32216
0	1.13623	0.533075
0	1.29633	0.959592
0	-0.863213	-0.28283
0	-0.146365	-0.0125071
0	0.988146	-0.221976
0	-0.038065	0.0166227
0	-1.6574	0.11038
0	-1.18183	-0.506986
0	1.12151	0.908038
0	-0.936909	-0.0781679
0	-1.6077	-0.843523
0	-1.13962	-1.12089
0	0.510191	-0.0505597
0	-0.818332	0.236199
0	-1.34187	-0.627488
0	0.500115	-0.0391812
0	-1.74973	-0.104337
0	1.8195	-0.342648
0	-0.699808	-0.362447
0	0.168565	0.0487128
0	-0.431921	-1.5939
0	-0.116918	-0.148392
0	0.063439	-0.114607
0	-0.0315658	0.318752
0	-0.786703	-0.151334
0	0.378768	-0.374415
0	0.124367	0.528709
0	0.607602	-0.351631
0	0.872129	0.48715
0	-0.790589	0.358169
0	1.13695	0.529685
0	-0.495265	-0.06387
0	0.141419	-0.494641
0	0.0190352	-0.168017
0	0.646823	0.872607
0	-0.875275	0.439726
0	-1.83653	-1.64536
0	-0.55178	-0.0577326
0	0.443583	0.408013
0	-0.0832623	0.148455
0	0.277897	0.538481
0	-1.15801	0.259585
0	-1.69864	-0.368799
0	-1.17197	0.755766
0	0.636913	-0.190114
0	-0.139408	0.741289
0	0.0254992	-0.0593422
0	0.62595	0.267667
0	0.356779	-0.00873475
0	0.610007	0.319316
0	-1.03686	-0.345762
0	1.20374	0.570266
0	-0.39529	-0.224993
0	-1.44688	0.0182774
0	0.118891	-0.387498
0	0.359803	0.413211
0	0.474887	0.669806
0	-2.21402	-0.631451
0	-0.0920685	0.404392
0	0.719005	0.409898
0	1.72802	0.671684
0	-0.04811	-0.116872
0	-0.136443	-0.299505
0	-0.741806	0.448854
0	-0.0745126	0.492459
0	-0.19047	-1.04563
0	-1.84125	-0.82536
0	0.126188	-0.102168
0	-0.37201	0.295034
0	1.36206	0.710879
0	-0.19802	-0.384702
0	0.0105938	-0.905299
0	0.397459	0.445795
0	0.765912	0.427229
0	1.68532	0.952183
0	-2.22116	0.104411
0	-0.12093	0.115443
0	1.25633	-0.26405
0	0.604071	0.416121
0	0.711605	-0.335273
0	0.630347	-0.206011
0	-0.482028	0.137284
0	-0.0593293	0.61854
0	-0.177519	-0.362192
0	0.0742171	0.301512
0	-0.280637	0.417458
0	0.621895	-0.32706
0	-0.152725	-0.00646776
0	-0.40595	-0.33627
0	0.21726	0.75773
0	0.780317	0.594066
0	-0.206793	0.630006
0	-1.21144	-0.309438
0	0.485272	0.649435
0	0.424639	-0.344864
0	-0.467885	0.845885
0	0.744953	0.307533
0	-0.200343	0.205853
0	-0.866061	-0.256076
0	-0.515328	0.190316
0	-0.533068	-0.0730121
0	-0.927188	-0.544293
0	1.10648	-0.0155542
0	1.15161	-0.129562
0	0.822677	-0.567736
0	0.129319	0.400535
0	1.02113	-0.192756
0	-0.124018	0.14494
0	-0.982171	0.325323
0	0.157302	-0.0361226
0	1.01953	0.625028
0	0.0775791	0.00679532
0	0.20074	0.269381
0	0.549969	0.369254
0	0.285629	0.5364
0	0.73033	0.0255295
0	0.276063	0.143079
0	-0.125827	-0.578928
0	1.49704	-0.133001
0	-0.707586	0.820288
0	0.648921	0.453389
0	0.0755683	0.522681
0	-0.0313415	-0.534529
0	-0.102804	0.552319
0	-1.25311	-0.315174
0	-0.477238	-0.217984
0	1.20947	0.413107
0	0.165047	-0.678961
0	-0.0824164	-0.015102
0	1.91004	0.583996
0	-1.15105	0.518047
0	-1.02072	-0.41773
0	1.35374	1.14812
0	1.05262	0.324583
0	-0.619722	-0.372491
0	-0.333064	-0.0905617
0	-0.226918	-0.707055
0	0.657005	0.650242
0	1.08524	0.108781
0	-0.496917	0.181554
0	-1.65465	-0.982368
0	-2.07616	0.182225
0	0.731834	0.477508
0	0.25608	0.444632
0	-1.34302	0.0933434
0	1.98395	0.842906
0	-0.539134	0.591482
0	0.751742	0.143352
0	0.563219	0.337127
0	-2.73285	0.141887
0	1.37333	-0.333123
0	0.151614	0.435465
0	0.594531	0.322126
0	-1.29366	0.359651
0	-1.23171	0.227934
0	0.884128	-0.1541
0	0.0397276	-0.617649
0	-0.113941	-0.174997
0	-0.00442915	-0.358311
0	0.235092	-0.19603
0	1.43979	0.682363
0	-0.396358	0.178923
0	0.947731	0.683965
0	-0.882338	-0.64908
0	-0.890131	-0.340083
0	0.912526	0.0589323
0	-0.177461	0.0987223
0	0.54003	0.237498
0	-0.348728	-1.29374
0	-1.42353	-0.918762
0	-0.112279	0.342382
0	-0.325032	-0.861057
0	-0.433017	0.877386
0	-0.400404	0.092002
0	-0.494977	0.953029
0	-1.06094	0.0978223
0	0.60524	-1.11595
0	1.66308	0.28734
0	-1.5292	-0.940264
0	0.99286	0.813056
0	-1.08666	0.00523386
0	0.806209	-0.786143
0	-0.80846	-0.754083
0	1.51573	0.53391
0	1.72486	0.580258
0	-2.64774	-0.578896
0	-1.1293	0.621195
0	-0.189536	-0.606213
0	0.266936	0.559882
0	0.861214	0.502366
0	0.741443	-0.21132
0	-0.27835	0.0949285
0	-1.74784	-0.686491
0	-0.800334	0.131808
0	-0.831901	-0.373496
0	-0.295785	-0.791146
0	1.26494	0.486155
0	1.87214	0.717362
0	0.436077	0.050901
0	0.332865	0.430211
0	1.11592	0.0172587
0	0.994384	0.842611
0	0.515659	0.909676
0	1.19027	-0.648886
0	-1.311	-0.40408
0	1.05078	0.0735201
0	-0.657795	0.68527
0	-0.610638	-0.126956
0	-0.20926	0.371083
0	1.50045	0.893536
0	0.800431	0.0395972
0	1.25228	0.285167
0	-0.952095	-0.46964
0	-0.93437	-0.946963
0	0.323527	0.0704524
0	0.340269	0.631287
0	0.948333	0.0743647
0	-1.04451	-0.0494442
0	1.17205	0.578166
0	-0.712431	-0.964506
0	0.366117	0.211134
0	-1.48286	0.0512644
0	0.667125	0.666353
0	0.75665	0.585583
0	0.128718	0.217942
0	-1.86395	-0.567079
0	0.52358	0.0322671
0	-1.40448	-0.284783
0	-1.15397	-0.903042
0	-0.558819	0.405366
0	-0.532787	0.392939
0	-0.244367	-0.646032
0	-0.775924	0.169886
0	0.738485	0.441368
0	-0.0645653	-0.377376
0	-0.482788	-0.326558
0	2.98505	0.955291
0	-0.485618	0.363482
0	-1.41135	-0.25662
0	-0.219068	-0.00581748
0	0.466549	0.472691
0	2.08134	-0.122401
0	0.899197	0.578558
0	0.736632	0.437598
0	-0.0422019	0.317552
0	1.68252	0.706083
0	0.523281	0.193289
0	0.369846	0.326236
0	1.89705	0.838353
0	-0.3531	0.606505
0	0.856277	0.151312
0	-0.994588	-1.30481
0	-0.432253	-0.511388
0	-0.0347512	0.343952
0	2.05829	0.775116
0	0.418737	1.08429
0	2.48778	0.736564
0	-2.2092	-0.0134447
0	-0.215545	0.814612
0	0.914392	0.855377
0	0.0890319	0.788403
0	-0.369129	-0.977285
0	0.558964	0.67136
0	0.0335467	1.05291
0	-0.829954	-0.46076
0	-1.40874	-0.77764
0	-0.240097	-0.350005
0	-1.20366	-1.22787
0	-0.883997	-0.0861736
0	-1.05999	-0.674862
0	0.492398	1.0587
0	-1.0016	-0.690222
0	-0.753659	-0.410038
0	-0.471542	-0.420117
0	0.936884	0.116222
0	-0.995242	0.0428856
0	-0.696882	-0.490551
0	1.21183	0.532074
0	1.55837	-0.530003
0	1.19041	-0.0125428
0	-1.12863	0.0974794
0	-0.841855	0.390959
0	-0.276259	0.765138
0	1.14773	0.651733
0	0.0438628	0.130982
0	0.449403	-0.286258
0	-1.86996	0.29809
0	0.875305	0.116694
0	-0.634322	-0.150449
0	0.230931	1.00871
0	-2.51679	-0.836324
0	1.66317	0.879772
0	-1.02297	-0.645184
0	-0.726154	-0.303751
0	0.162238	0.906983
0	0.895657	0.483062
0	1.48409	-0.1194
0	1.34099	0.418245
0	0.314887	0.163509
0	-0.194823	-0.663211
0	0.0514447	0.890986
0	0.423498	0.346846
0	0.166519	-0.140681
0	-0.712447	0.135235
0	-0.396222	0.433521
0	-0.255462	0.188145
0	0.120148	0.453635
0	-0.306418	-0.450578
0	-0.113348	0.514728
0	-0.236285	-0.478537
0	-0.651874	-0.198188
0	0.0600255	0.0653722
0	0.196543	0.00382
0	-1.49222	0.0336955
0	-2.2752	-0.119441
0	-1.13281	-0.481628
0	-0.875858	-0.723739
0	1.23643	0.349393
0	-2.27571	-0.927909
0	-0.734869	0.0651426
0	-0.237478	-0.155552
0	-1.76033	-0.931698
0	0.571608	-0.0710636
0	1.134	0.820049
0	1.96107	0.952828
0	0.871747	-0.866404
0	-0.589461	0.293617
0	-0.627108	0.0586384
0	0.374609	0.366243
0	-0.619448	-0.0985248
0	1.50331	1.05261
0	0.549735	-0.284239
0	1.71992	0.0400665
0	0.518949	0.446522
0	0.0939393	0.104145
0	0.209069	0.815293
0	1.35875	0.69781
0	-0.537625	0.43435
0	2.11958	0.528171
0	1.64293	0.190891
0	0.750308	0.245877
0	0.025614	-1.05591
0	1.60883	1.08933
0	0.811183	0.0111793
0	-0.51182	-0.380852
0	-0.313827	0.230113
0	1.22471	-0.477081
0	-1.18478	-0.0987712
0	-2.41961	-0.667079
0	-1.21666	-1.1719
0	1.11402	0.429764
0	-0.0058153	-0.556671
0	0.50313	0.195237
0	-0.266159	-0.840947
0	0.465632	-0.154863
0	0.0705995	-0.266792
0	-0.392229	-0.606921
0	0.331997	-0.0129738
0	-1.07505	-0.0641007
0	1.6904	0.115081
0	-0.229717	0.693265
0	0.424879	-0.004117
0	0.436814	0.37559
0	0.664107	0.4314
0	1.06977	0.568903
0	0.240446	-0.521008
0	0.241364	0.253193
0	0.933514	0.0442844
0	1.12444	-0.0434767
0	0.0249143	0.316352
0	0.0210505	-0.0664317
0	1.76806	0.449021
0	-0.303352	-0.244507
0	-0.879561	-0.96505
0	0.802551	0.209067
0	1.08337	0.105521
0	-3.33721	-0.439649
0	0.488452	0.0584797
0	0.293001	-0.0736756
0	1.10579	0.512996
0	-1.63526	0.637854
0	-0.88613	-0.447053
0	-1.10515	0.242819
0	-0.454454	0.580893
0	-1.06048	-1.19357
0	-0.815473	-0.58996
0	0.862176	0.34301
0	1.61537	-0.267744
0	-0.304237	1.03478
0	-0.318761	0.0169643
0	0.981437	1.10242
0	0.770851	0.699317
0	0.0560874	-0.140738
0	-1.47448	-0.577107
0	2.04533	-0.0758819
0	-0.806667	0.0926534
0	0.583399	0.669117
0	0.135779	-0.315394
0	1.73728	0.403717
0	0.135126	0.215095
0	-0.523443	-0.181097
0	0.869038	-0.666114
0	-1.52019	-0.250069
0	-0.0213244	-0.349982
0	0.368052	-0.00329635
0	-0.412469	-0.482111
0	-1.82707	-0.118051
0	0.281003	0.193847
0	-0.238801	0.414633
0	0.174787	-0.067463
0	0.0975604	-0.00153983
0	-0.521233	-0.319769
0	0.618966	0.00504361
0	0.285002	0.000815139
0	1.31409	0.956289
0	1.58113	0.973423
0	0.967962	-0.175034
0	0.595568	0.970971
0	-1.35239	-0.158247
0	1.26399	-0.0742259
0	1.11149	-0.383097
0	-0.233502	-0.0751578
0	-1.95143	-0.0782804
0	0.00682263	0.0787188
0	0.451851	-0.099904
0	-0.339906	-0.676679
0	-0.27176	-0.343572
0	-0.521152	-0.497096
0	-0.400355	-0.803915
0	1.16083	0.993572
0	-0.603301	-0.952929
0	1.804	0.725527
0	-0.865624	-0.525663
0	-1.2042	0.347945
0	1.7563	0.683942
0	1.61943	-0.00382432
0	0.541282	-0.0745422
0	0.256675	0.904848
0	1.0535	0.587164
0	0.912289	-0.153688
0	1.17943	0.0861591
0	-1.23882	-1.06821
0	0.199981	0.193887
0	2.01626	0.580599
0	1.41316	-0.166
0	1.09477	0.524456
0	0.942002	-0.122423
0	0.263937	-0.880686
0	0.514539	0.653311
0	-2.17034	-0.980063
0	-0.620735	-0.344175
0	0.406252	0.925229
0	-0.296185	1.25427
0	-0.340986	-0.476575
0	0.743207	0.0758009
0	1.95527	0.704242
0	-0.252664	0.00403489
0	-0.196921	-0.481249
0	0.752083	0.9159
0	0.663461	0.11402
0	0.696204	-0.245134
0	-0.109803	0.503961
0	1.41831	0.425329
0	-2.69829	-1.15994
0	-0.367114	-0.560048
0	0.295812	-0.368365
0	0.141959	-0.956131
0	-0.438866	-0.00631743
0	-1.39524	-0.747001
0	0.728336	0.520535
0	-0.478437	-0.616988
0	0.983024	0.439208
0	0.416837	0.235239
0	0.927714	0.550992
0	-1.35014	-0.158063
0	-1.7978	-1.96434
0	-1.99055	-0.360897
0	-0.564122	-0.489107
0	2.04126	0.576519
0	0.229965	0.395927
0	0.407779	-0.116721
0	0.667781	-1.06331
0	0.301444	0.805961
0	-0.454284	0.181537
0	0.513434	-0.322253
0	-0.875093	-0.646983
0	-0.447613	-0.517331
0	-0.695343	-0.77391
0	0.778703	0.383408
0	0.369755	0.733519
0	0.0362823	0.245657
0	-0.565778	-0.0119192
0	0.697296	-0.0024452
0	1.57788	0.664554
0	0.782768	0.0917338
0	-1.89963	-1.06813
0	0.137674	0.0922016
0	0.372603	-0.13137
0	-0.851991	-0.279157
0	0.536344	0.02835
0	-0.867516	-1.04083
0	0.472413	-0.202263
0	-0.416703	-0.187497
0	0.1919	-0.0110396
0	-1.48856	-0.0390328
0	0.212982	-0.00810281
0	0.506601	0.263302
0	-1.45984	-0.521773
0	-0.947263	-0.343033
0	0.509963	-0.194742
0	0.749045	-0.0214918
0	-0.02687	-0.356071
0	2.1098	0.700047
0	-2.6199	-0.0344969
0	-0.105732	0.0393959
0	0.391296	-0.0881711
0	1.84221	0.14296
0	0.357154	0.64664
0	0.310561	0.38329
0	0.097167	-0.296758
0	-1.21706	-0.187645
0	-1.52028	-0.566612
0	-0.0284309	-1.02448
0	0.747983	0.646888
0	-0.527096	-0.744522
0	-0.234918	-0.14504
0	-0.492434	-0.566527
0	1.57	0.119787
0	-0.2645	-0.0269003
0	0.909029	-0.227366
0	-0.264038	0.675432
0	0.73263	0.118321
0	-1.3604	-1.09458
0	-0.974806	-0.697381
0	0.1028	-0.72656
0	0.135831	0.0638256
0	0.0122654	0.268746
0	1.41845	0.375147
0	-0.275261	0.221734
0	-0.553783	0.498769
0	0.0144335	-1.09057
0	-0.889803	-0.95897
0	0.994657	0.0836134
0	-1.62214	-0.193886
0	-0.189782	-0.89615
0	0.835103	0.702338
0	1.24389	0.000886683
0	-0.176567	0.146518
0	0.430473	0.548758
0	1.04359	0.329446
0	-0.526016	-0.842285
0	0.526218	0.0389165
0	0.356904	-0.0667173
0	0.191607	0.567132
0	-1.3631	-0.355131
0	0.391026	-0.0535805
0	0.462468	0.563492
0	0.562768	0.275952
0	-1.17052	-0.125642
0	1.06877	0.608038
0	1.12252	0.296835
0	0.330249	0.171121
0	0.763245	0.373536
0	0.314843	0.305144
0	-1.6798	-0.560352
0	-0.37067	-0.0713136
0	-0.0932979	-0.221714
0	-0.0456429	0.205395
0	0.13506	0.215554
0	-1.73862	0.162591
0	-0.684936	-0.223027
0	0.454414	0.319794
0	0.0925036	-0.250023
0	0.207797	-0.0400822
0	0.17963	-0.088965
0	-0.906966	0.355825
0	-0.624216	-0.381291
0	0.649857	0.133877
0	0.108749	-0.447265
0	2.14836	0.272525
0	1.20633	0.67998
0	1.95006	0.62388
0	1.06538	0.702889
0	1.58419	1.0335
0	1.31136	0.618603
0	0.671606	0.239433
0	-0.355752	0.356778
0	0.63643	-0.58957
0	0.47624	0.377128
0	-0.945526	0.426473
0	0.337451	-0.389097
0	-0.514751	-0.196315
0	-2.02277	-0.554997
0	-1.75551	-0.633757
0	0.518862	0.898509
0	0.463898	-0.0900287
0	0.445557	0.259115
0	0.281594	0.474989
0	1.27475	0.187972
0	0.613831	-0.0581344
0	0.657885	0.451571
0	-1.24206	-0.677847
0	0.487699	-0.23466
0	-1.18677	-0.760094
0	-0.996731	-0.107369
0	-0.339673	1.16772
0	-0.369156	-0.28242
0	-0.159815	0.157214
0	-1.11475	-0.629671
0	-0.223612	-0.283785
0	-1.58607	0.07514
0	0.0616528	-0.25651
0	-0.030609	0.459857
0	0.597452	-0.131582
0	0.226115	0.214591
0	-2.66075	-0.970183
0	-0.662481	-1.6462
0	-0.797414	0.651257
0	-1.4599	-0.36158
0	1.13132	0.482386
0	-0.991407	0.23839
0	-0.330108	-0.197081
0	0.635028	0.892002
0	-0.737967	-0.839828
0	0.81992	0.383998
0	-0.200237	-0.951035
0	0.202151	0.383908
0	0.157002	0.220672
0	-1.35926	-0.0279957
0	0.385529	1.01338
0	0.905664	0.266761
0	-1.74362	-1.27659
0	-1.4507	-0.861408
0	0.244724	1.06639
0	1.14078	0.0620304
0	-0.0287659	0.60995
0	1.34655	0.0215821
0	0.609613	-0.335862
0	0.572222	0.806822
0	0.226012	0.91311
0	0.223867	0.853372
0	-2.60427	-0.661373
0	-2.46392	-0.490489
0	0.0431353	0.614203
0	-1.42745	-0.352213
0	-0.332245	0.437179
0	-1.79613	-1.23502
0	0.400859	-0.0854678
0	0.245319	0.317403
0	-0.980583	-0.61705
0	0.567655	0.514654
0	-2.59498	-0.16354
0	1.24947	0.663708
0	1.77238	0.497923
0	-0.644632	-0.349065
0	-0.31326	0.433561
0	-0.992386	-0.727568
0	-1.14254	-0.304492
0	-0.53287	-0.330671
0	-2.29088	0.442752
0	-0.402715	-0.497146
0	-1.98685	-0.246434
0	0.211311	0.459514
0	0.415999	0.721203
0	-0.624429	-0.66874
0	-0.677572	0.171271
0	1.22352	1.44216
0	0.39604	0.265219
0	0.690098	0.525852
0	1.44894	-0.0942941
0	-1.33901	0.132364
0	-0.589392	0.171671
0	-0.678206	-0.738077
0	-1.68714	-1.25809
0	-0.78749	0.163323
0	-0.819418	0.971827
0	0.264244	0.0923802
0	-0.903727	-0.747076
0	-0.734148	-0.129865
0	-1.61277	-0.216083
0	1.03452	0.223113
0	-1.09144	-1.29264
0	2.18145	1.06278
0	-1.57919	-0.645003
0	-0.0882194	-0.359237
0	-0.889079	0.0962267
0	0.42787	-0.190035
0	2.26063	0.998272
0	-0.805238	-0.922086
0	0.716823	0.554577
0	0.480238	-0.716029
0	1.11918	-0.139959
0	-0.832697	-0.740197
0	1.10917	0.674862
0	0.049527	0.268111
0	-1.07406	-0.39563
0	0.0751631	0.0267234
0	-0.659755	-0.12698
0	0.148791	-0.0547079
0	1.15467	-0.00899511
0	0.664832	0.141131
0	-0.644087	0.116777
0	1.98165	0.766661
0	-1.1088	-0.594235
0	-0.349286	-0.726817
0	-0.752991	0.338507
0	0.171287	0.0170374
0	-0.104216	-0.0281932
0	0.773917	0.00135451
0	-1.84411	-0.351021
0	0.874462	0.252645
0	-0.41232	-0.297522
0	-0.891585	0.713862
0	-0.242637	-0.0913121
0	0.317691	0.0527469
0	0.333412	0.41569
0	0.897469	0.151524
0	-0.0151317	-0.824913
0	0.214692	-0.159025
0	2.32903	0.522106
0	1.11267	-0.410179
0	0.109715	0.0874938
0	-0.0220865	-0.258783
0	-1.75318	-0.182033
0	-1.31368	-0.828211
0	0.201516	-0.041119
0	1.0153	0.0634443
0	-0.564437	-0.341457
0	-0.312535	-0.679688
0	0.236681	-0.332867
0	0.204184	-0.053368
0	-0.829181	0.00158015
0	-0.988911	-0.183967
0	-0.671574	0.248643
0	-1.94011	-0.857937
0	-0.44411	0.148298
0	-1.1273	-0.688859
0	0.248401	0.438235
0	-1.68567	-1.10733
0	1.07443	0.501102
0	1.53626	-0.0706687
0	1.72389	-0.330749
0	0.480029	0.546039
0	-1.39515	0.0545337
0	-1.28208	-0.691119
0	0.534317	-0.00145644
0	0.887054	-0.280897
0	0.0863673	0.319089
0	0.632737	0.323741
0	-0.670972	-0.683803
0	0.107476	-0.635026
0	0.294214	-0.139462
0	1.35967	-0.367915
0	-0.0444666	0.210591
0	-1.66299	-0.269873
0	-0.999314	-0.506038
0	0.32199	0.309823
0	-0.657246	0.245313
0	0.271893	-1.10218
0	-0.676421	0.390662
0	-0.976791	-0.683675
0	1.14031	0.0887009
0	0.509037	0.0175263
0	-0.999524	-0.29321
0	-0.330633	-0.669031
0	1.28988	0.792377
0	-0.225482	0.467024
0	0.118595	-0.356369
0	0.0997256	0.104191
0	-0.830391	-0.283292
0	-0.341042	-0.261322
0	1.70764	0.798097
0	-0.78929	-0.36264
0	-1.27924	-0.376169
0	1.02688	0.900524
0	-0.410278	-0.0849287
0	0.492966	0.114161
0	2.31535	1.00325
0	0.342669	-0.0481234
0	-0.0568894	-0.958686
0	0.0300126	0.552778
0	-1.2941	-0.113951
0	1.1689	0.352649
0	-0.308869	-0.529609
0	1.41276	0.0994263
0	0.521853	0.283684
0	-0.07606	-0.672171
0	0.0850912	0.520628
0	0.705096	-0.354809
0	1.31077	0.0157325
0	1.43071	0.38305
0	0.0514137	-0.217752
0	0.0398413	0.0562416
0	1.3296	0.336157
0	0.438785	-0.102354
0	1.48151	-0.213179
0	1.19276	-0.329049
0	0.0863281	0.0141905
0	-0.11466	-1.25618
0	-0.210643	0.562668
0	-1.06187	-0.67841
0	0.605065	0.462194
0	0.352927	-0.414646
0	-1.61586	0.19085
0	-0.264984	-0.0259182
0	1.33136	-0.128187
0	-0.634586	0.172522
0	-0.00181227	-0.533848
0	-0.571524	-0.265542
0	0.266689	1.16769
0	0.193044	-0.403244
0	0.00951625	-1.10135
0	-1.507	-1.00382
0	0.796142	-0.10174
0	0.741786	-0.903499
0	-1.10002	-0.0732106
0	0.37755	0.615386
0	0.758741	0.18249
0	-1.24604	-0.663015
0	-1.44946	-0.469414
0	-0.816178	-1.16845
0	1.89258	0.351613
0	-0.711413	-0.997968
0	0.875779	0.157371
0	-0.105427	0.0333526
0	0.107123	-0.0234451
0	1.04881	-0.437021
0	1.47674	-0.384448
0	0.522494	0.0566949
0	-0.69522	-0.179098
0	1.27741	0.472534
0	0.729689	-0.675217
0	-2.21682	-0.281855
0	-0.694797	0.870392
0	-0.224453	-0.134472
0	-1.17814	-0.501446
0	0.035627	-0.15483
0	0.510217	0.429163
0	0.656751	0.182334
0	0.0621045	0.549991
0	0.261307	0.511263
0	0.579839	-0.3184
0	0.0808421	0.350971
0	0.870639	0.0539421
0	-0.332476	-0.977161
0	0.300091	0.355658
0	0.167359	0.151935
0	-0.567184	-0.0214145
0	-1.03821	-0.295579
0	1.37741	0.522931
0	-0.66977	0.111776
0	0.254316	-0.317125
0	1.05961	0.285293
0	0.030121	-0.848144
0	-0.117729	0.402655
0	0.765467	-0.460877
0	0.506473	0.599275
0	-1.0409	0.418068
0	-0.256183	-0.517198
0	-1.35914	-0.471094
0	0.214014	-0.711759
0	0.120231	0.0677269
0	0.0207999	-0.181992
0	-0.779083	0.227576
0	-0.121791	-0.230163
0	-0.203187	-0.292004
0	0.421346	-0.214846
0	1.4053	0.0302193
0	0.71298	1.12936
0	-0.901159	0.304048
0	-0.742248	0.668165
0	-0.702301	-0.0905927
0	-0.0702833	-0.074894
0	-0.33601	0.100481
0	-0.253767	-0.184721
0	0.953642	0.602517
0	0.372599	0.0197637
0	-0.786993	0.783887
0	-0.348674	0.185256
0	-0.704325	-0.841764
0	-0.296868	0.404038
0	0.853468	1.19202
0	-0.4611	-0.10362
0	-2.61239	-1.36489
0	-0.187731	0.736179
0	-0.559302	0.313985
0	-0.659312	-0.492273
0	0.742157	0.752134
0	-0.320587	-0.105165
0	0.163092	0.0968401
0	1.67165	0.430475
0	0.668837	-0.0386571
0	0.211364	-0.377011
0	1.65059	0.176222
0	0.621394	0.0486744
0	0.455254	0.661847
0	-0.073292	-0.320358
0	-2.34484	-0.814837
0	-1.06218	-0.473359
0	-1.96434	-0.671969
0	-1.63201	-0.856911
0	-0.196355	0.243893
0	-0.582509	-0.630063
0	0.0874922	-0.429581
0	-1.4344	-1.36268
0	-0.893002	-0.0565532
0	1.43725	0.68995
0	-0.66664	-0.110506
0	-0.107557	0.617758
0	0.975729	0.676391
0	-1.07985	-0.610947
0	-1.26737	-0.555952
0	0.083923	0.763947
0	-1.84352	0.259269
0	1.66193	0.512828
0	-2.83441	-0.412312
0	1.01665	-0.0709192
0	-0.167444	-0.151104
0	-1.99719	-0.499887
0	-1.16014	0.0384793
0	-0.819627	-0.129927
0	-0.717656	0.0349725
0	0.601871	1.15622
0	0.4485	-0.519173
0	1.04276	0.379687
0	1.27618	0.224073
0	-1.53019	0.502561
0	-0.438596	0.000603446
0	-0.335984	-0.103743
0	0.765774	0.227922
0	-0.78945	0.349133
0	0.549545	1.00976
0	0.68262	0.817831
0	-0.369533	0.515485
0	0.453344	0.717941
0	-0.74714	-0.207516
0	-0.214492	-0.0898275
0	0.323839	0.437866
0	0.817589	0.478463
0	0.713759	0.503119
0	-0.0903323	-0.207735
0	0.237927	-0.247114
0	-0.798364	-0.0976235
0	0.495565	-0.133792
0	-0.0134171	1.30117
0	-0.54699	0.822098
0	-2.79085	-0.529406
0	-0.81966	-1.62203
0	0.706999	0.222333
0	-0.352231	-0.218516
0	-0.366304	-0.596523
0	-1.63033	0.201921
0	0.470071	-0.136638
0	0.0390733	-0.0381011
0	0.4742	-0.439224
0	0.168779	-0.314341
0	-0.173224	-0.211496
0	0.219197	-0.312224
0	-1.08601	0.205834
0	0.934406	0.577476
0	-0.3582	-0.348431
0	-0.0486222	-0.151125
0	0.638814	0.365584
0	1.05819	0.821078
0	-0.339988	0.298064
0	-0.305406	-0.573989
0	1.51534	0.129833
0	-0.771626	-0.298516
0	1.76515	0.345157
0	0.768549	0.833994
0	-0.292103	-0.239797
0	-1.21871	-0.582619
0	1.95908	0.385469
0	-0.541201	0.0151853
0	0.70977	0.145091
0	-0.0384753	-0.543585
0	-0.626281	0.272677
0	-1.984	0.134563
0	-0.25996	0.00616689
0	2.34494	0.466529
0	-0.63594	-0.15747
0	1.01452	0.0486882
0	1.03107	-0.0791276
0	-0.35114	-0.385298
0	1.25517	0.531775
0	-0.994701	-0.275376
0	1.2517	0.725882
0	-0.747474	-0.72198
0	1.84587	0.41753
0	0.768659	-0.125878
0	0.252095	0.0781463
0	-1.75078	-0.327574
0	0.369071	0.778196
0	0.234464	-0.250841
0	0.494066	-0.0136945
0	-0.185477	-0.647123
0	1.18602	0.129931
0	-1.17306	0.0176379
0	0.434623	0.27949
0	0.495378	0.607297
0	-0.259558	0.0580617
0	1.09793	0.367397
0	-0.221238	-1.0362
0	-0.0584983	0.759904
0	1.95866	0.700379
0	-0.29449	-0.528778
0	-2.00689	-0.382969
0	1.3303	0.647336
0	-0.621822	-0.747971
0	-1.41434	-0.86209
0	-0.412089	0.136338
0	-0.259923	-0.821151
0	1.96226	0.726273
0	-0.419499	0.171475
0	1.83699	0.137578
0	-0.125814	-0.511507
0	1.4122	0.0726008
0	0.188231	0.39605
0	0.796637	-0.281752
0	-0.273304	-0.175272
0	-1.27411	0.123022
0	0.159866	-0.23446
0	2.45352	1.01601
0	-0.637844	0.695705
0	-1.55318	-1.56171
0	-0.504738	0.0298396
0	-0.0756816	-0.666819
0	-1.01501	0.730007
0	-1.33234	-2.05205
0	-1.38461	-0.0153577
0	-0.961544	-0.579867
0	0.521711	-0.28214
0	0.127797	0.0359708
0	-0.233208	0.300653
0	1.05834	0.422599
0	1.03135	-0.967406
0	-1.99635	-0.500065
0	-0.276451	0.488211
0	0.393311	0.717552
0	-1.36682	-0.835149
0	0.189284	0.0420793
0	-0.704903	0.468879
0	0.692708	-0.435202
0	0.756731	0.135493
0	-0.257233	-0.709191
0	0.296746	0.598477
0	0.758013	0.324482
0	-1.78303	-0.793755
0	0.102777	0.141147
0	0.155189	-0.226434
0	0.0124602	0.541604
0	-1.2797	0.25926
0	-0.69187	-0.435065
0	0.466438	-0.0304837
0	1.7141	0.878753
0	1.2685	1.06298
0	-0.084774	-0.00483519
0	0.777522	-0.145644
0	-0.718408	-0.317019
0	-0.990707	-0.354908
0	0.386623	-0.376252
0	-0.743507	-0.492464
0	0.399902	0.643693
0	-0.393936	0.323646
0	1.4141	0.976277
0	-1.93897	-0.685532
0	0.964117	-0.53804
0	-0.54336	-0.283432
0	-0.290414	-0.534697
0	0.370738	-0.746073
0	0.197653	-0.0682474
0	-0.192764	0.185642
0	0.575293	-0.0613011
0	1.27357	0.730856
0	-0.920146	-0.411425
0	-0.49749	-0.356931
0	-0.245783	-0.209888
0	-0.980822	-0.828545
0	-0.285847	-0.327174
0	1.96949	0.548188
0	-0.447722	-0.177128
0	1.56881	-0.209228
0	0.0271203	-0.400371
0	-0.449309	-0.999063
0	-0.650859	-0.0266145
0	-0.579921	-0.538869
0	1.13904	0.312401
0	0.441803	-0.238672
0	1.22754	0.768279
0	-1.82786	-0.0147845
0	0.995444	0.556708
0	-0.739976	0.00736813
0	-1.06462	-0.206915
0	1.31191	-0.819886
0	-0.556296	0.4804
0	0.75202	-0.264188
0	0.875245	0.635398
0	-0.185695	0.624169
0	0.481746	-1.14845
0	0.0394897	0.236957
0	1.34823	0.090558
0	-0.415727	-0.0635725
0	1.77399	-0.00776643
0	0.225389	0.0244794
0	1.02908	0.636894
0	0.0574032	0.109595
0	-0.485236	0.681578
0	0.18377	0.328367
0	-0.340894	-0.141687
0	0.548946	0.7935
0	-1.17931	0.827814
0	-0.427789	0.319811
0	-0.235068	-0.512629
0	0.587622	0.572836
0	0.0796956	-0.465653
0	0.176303	-0.0413787
0	0.271729	-0.334003
0	0.814677	0.0344999
0	0.853519	0.624898
0	1.16374	0.50117
0	-0.747791	-0.443645
0	0.628362	0.666279
0	0.0612129	0.0041788
0	0.43064	0.0595407
0	-0.0786365	-0.312729
0	0.0265798	-0.0185345
0	-1.24885	-0.296128
0	-0.227278	0.880943
0	-0.0177069	0.228856
0	-0.729781	-0.024716
0	-0.833449	0.133631
0	1.13878	-0.144109
0	1.10899	-0.280793
0	1.13156	-0.464383
0	-3.07323	-0.261873
0	-0.84426	-0.853439
0	-1.09569	-0.221539
0	0.733757	0.0720882
0	-0.331046	-0.178042
0	0.530127	0.744216
0	0.159796	0.15337
0	-1.03259	-0.206907
0	-1.67935	0.676026
0	0.420029	-0.352331
0	-0.855984	-0.611768
0	-0.254478	0.3125
0	-1.38921	-0.440051
0	-0.687169	-0.127288
0	-0.323279	-1.07192
0	2.26581	1.081
0	-0.363137	-0.112357
0	0.154606	-0.590649
0	-0.398922	0.68767
0	0.414568	-0.494095
0	0.507969	-0.86195
0	2.49535	0.758104
0	-1.77204	-0.579224
0	0.207795	0.49461
0	0.52384	-0.968086
0	1.04608	0.482926
0	1.43833	1.31827
0	-0.71748	-0.449055
0	-0.327973	-0.472737
0	0.105153	0.234626
0	0.391108	-0.67714
0	-0.826925	-1.06952
0	0.58956	0.488904
0	-0.926755	-0.124601
0	0.861416	0.0660161
0	1.53025	0.40473
0	-0.818894	-0.570442
0	0.249664	0.299018
0	-1.16964	-0.535509
0	-0.182029	-0.595121
0	0.770355	-0.0417474
0	-0.334273	-0.0756673
0	-0.602154	0.108738
0	-0.55082	-0.90221
0	0.843048	0.563209
0	1.25444	0.584235
0	-1.76922	-0.393372
0	-2.52927	-1.26936
0	0.00971132	0.236838
0	-2.48648	0.239924
0	0.114051	-0.787614
0	2.02628	0.890181
0	0.0101072	0.493221
0	1.16301	-0.120981
0	0.581643	0.198954
0	0.548431	0.770262
0	0.293778	-0.14323
0	0.91937	-0.777361
0	0.0803054	0.0627918
0	-3.37683	-0.740958
0	-0.914528	-1.11768
0	-1.52649	-1.10901
0	0.53394	0.121353
0	0.341175	-0.0783886
0	-0.885482	-0.399363
0	-0.254331	0.30164
0	1.10446	-0.0362581
0	0.65302	0.75908
0	0.317167	0.227243
0	1.20764	0.492058
0	-0.0190829	0.296802
0	0.726051	0.399647
0	0.875291	0.413423
0	0.84849	-0.0245178
0	0.553733	0.119624
0	-0.0781995	0.104421
0	-0.995191	-1.33483
0	1.56735	0.125099
0	0.000202918	0.172925
0	-1.34444	-0.651482
0	0.956199	-0.705572
0	-0.119	0.42446
0	-1.11307	-0.0874281
0	1.64277	0.387654
0	-1.47159	-1.09694
0	0.763229	0.370594
0	0.257719	0.321951
0	-0.806567	-0.0640438
0	0.727992	0.79201
0	-0.647262	-0.242793
0	-1.44584	0.284696
0	0.582827	0.734337
0	0.639451	0.470365
0	-2.38076	-0.295552
0	0.126778	0.852167
0	-0.658842	-0.366392
0	-0.780698	0.225841
0	-1.18138	0.109817
0	-0.377514	0.140125
0	0.810242	0.0906698
0	1.73193	0.723963
0	-0.0127761	0.372076
0	0.664777	0.499796
0	-0.797855	-0.00099591
0	0.738576	0.491906
0	-0.186815	-0.738493
0	-0.163452	0.0213622
0	2.15815	0.304156
0	1.22924	0.564915
0	0.071112	0.193648
0	1.22068	-0.82155
0	0.320473	0.144984
0	-1.79765	-1.10738
0	0.264236	-0.692859
0	-0.422543	0.298225
0	-0.168197	0.0863937
0	1.36666	1.20512
0	-0.301484	-0.27515
0	-0.23705	-0.244247
0	-0.634386	-0.516656
0	-1.09038	-0.31335
0	0.0611728	0.376131
0	-0.248897	-0.54804
0	-0.687361	0.228913
0	-0.773155	0.122212
0	0.385231	-0.314016
0	0.0158277	-0.988613
0	0.616138	0.573447
0	-0.239824	-0.915
0	-0.0498597	-0.563975
0	0.115784	0.240745
0	0.373543	-0.544457
0	0.34683	0.705755
0	-1.71686	-0.223404
0	-0.940319	0.100323
0	0.787409	0.0961687
0	1.45762	-0.125467
0	-0.520391	-0.973499
0	0.918614	-0.184167
0	-0.470662	-0.850101
0	-0.265019	0.171126
0	1.60463	0.96284
0	0.180411	0.178371
0	-1.71287	0.389469
0	0.54837	0.131413
0	-0.28009	-0.277205
0	-1.30587	-0.799799
0	-0.717937	-0.476449
0	-1.24775	-0.0549655
0	0.98432	-0.518951
0	-0.895256	-1.42877
0	-0.156014	0.0406273
0	0.851756	0.0932366
0	1.80142	0.455019
0	-0.250178	-0.751592
0	-0.132142	0.553092
0	1.64824	0.282273
0	0.658059	0.116839
0	-0.517903	0.218166
0	-0.577464	-0.460894
0	0.283617	-0.971269
0	-0.444634	0.0411748
0	0.181498	-0.669898
0	0.571718	0.263083
0	3.21508	0.586926
0	1.44996	0.781534
0	1.49464	0.467582
0	-1.24163	-0.859742
0	-0.834415	0.520591
0	-0.611578	-0.224771
0	1.62188	-0.102186
0	0.529746	0.0784057
0	1.13356	0.356955
0	0.18049	0.669571
0	0.875145	-0.0127652
0	-1.57416	-0.013407
0	-0.430379	0.419236
0	0.449767	-0.512094
0	1.05501	-0.898566
0	-1.49759	-0.799492
0	-1.2515	-0.734587
0	0.370681	0.209175
0	-1.03337	-0.586505
0	0.26323	0.183206
0	-2.21722	-0.669318
0	-0.18523	-0.361119
0	-0.743051	0.536042
0	-0.200555	-1.09065
0	-0.0584533	0.0316841
0	-0.118582	0.275505
0	0.68642	0.453976
0	-0.590998	0.148387
0	0.669231	0.737367
0	-0.811147	-0.708311
0	1.31689	0.312809
0	0.63334	0.102955
0	-0.249283	0.041714
0	-0.880435	-1.00634
0	-1.57879	-1.19222
0	0.748438	0.0776372
0	0.619825	0.576133
0	-0.00291126	-0.504155
0	-0.676344	-0.364126
0	-0.740858	0.657733
0	0.770121	0.230308
0	0.488739	0.274244
0	0.734523	1.19239
0	-1.01466	-0.521613
0	0.198217	-0.0253827
0	-0.757449	-0.334336
0	-0.592527	0.11123
0	-2.30844	-0.883986
0	-1.32668	-0.660031
0	0.490933	-0.163664
0	-0.257904	-0.308314
0	-1.44102	-0.678213
0	0.232688	-0.162738
0	0.66875	-0.171969
0	0.0765665	-0.402777
0	0.700577	0.059376
0	-1.85366	-0.904091
0	-1.13017	0.212533
0	0.587341	0.285515
0	0.308564	0.048433
0	-0.683028	-0.695704
0	-0.823202	0.0740142
0	-0.203354	0.209993
0	2.15406	0.896064
0	-0.455842	-0.572633
0	0.835522	0.187094
0	-0.565906	0.158463
0	-0.156146	-0.0526594
0	1.94853	0.0581515
0	1.50503	0.405199
0	0.170762	-0.140689
0	0.747004	-0.106112
0	-0.542985	-0.0573425
0	0.194394	-0.318519
0	0.325894	0.193709
0	-0.914492	-0.298321
0	0.402296	-0.318438
0	0.645003	0.0773396
0	-0.498699	-0.0946685
0	-0.979635	0.741984
0	-1.25382	-0.971447
0	-0.700709	0.200205
0	-1.66417	-0.41596
0	0.135074	0.186437
0	0.0442723	0.358343
0	0.62945	0.0756234
0	0.403577	-0.266721
0	-0.81964	-0.461353
0	-1.92784	-0.534519
0	0.584422	0.0737804
0	0.00612342	0.725504
0	1.00139	0.624953
0	0.773971	0.714508
0	-0.0991546	-0.907509
0	-0.202782	0.194397
0	0.120302	0.905109
0	-0.889344	-0.583431
0	0.403441	-0.334646
0	-0.165718	-0.629477
0	-0.209026	-0.191828
0	-2.50634	-0.728825
0	0.959067	0.684206
0	0.262284	1.09423
0	-0.589179	0.327759
0	0.907209	9.5254e-05
0	-0.712712	-0.510678
0	0.900494	0.214918
0	-1.75079	-0.63146
0	0.125604	-0.121477
0	1.19474	0.309133
0	0.427207	0.0567318
0	0.398294	-0.808798
0	0.858979	0.588754
0	-0.090626	-0.0566287
0	2.09019	0.465989
0	-0.133199	0.264152
0	0.816622	0.484389
0	0.31456	-0.355441
0	-1.96731	-0.465316
0	-1.511	-0.226973
0	0.803877	-0.22698
0	-0.58227	-0.0409122
0	-0.383193	-0.0576384
0	-0.917973	-0.160383
0	0.404195	0.0777729
0	0.681001	0.229679
0	-0.579979	-0.0328727
0	-0.816785	0.627116
0	-1.32766	-0.963636
0	-0.149446	0.376883
0	-0.294806	0.192293
0	-0.138707	-0.564372
0	0.567235	0.180522
0	-0.908358	-0.54282
0	-2.0338	0.111296
0	2.424	0.347806
0	-1.1202	-0.241885
0	0.782303	-0.00639066
0	1.68338	0.691909
0	0.162864	0.773577
0	-1.12404	-0.444104
0	-0.839947	0.288068
0	-0.104178	0.367404
0	-1.10069	0.189424
0	-0.0836196	0.513707
0	1.76551	-0.609422
0	1.27004	0.688917
0	0.609888	0.0373337
0	-0.401899	0.519168
0	0.959267	0.577126
0	-1.9747	0.0732422
0	0.190143	0.200527
0	-0.144281	-0.596455
0	0.267718	1.02488
0	0.210217	1.35662
0	0.300539	-0.515601
0	1.20727	0.372865
0	2.08523	0.906488
0	0.589493	0.0906611
0	-0.776781	-1.13655
0	-0.787145	0.197876
0	-0.160735	0.200956
0	0.487497	-0.373192
0	0.527381	0.208624
0	-0.170221	-0.245302
0	-0.344478	-0.947489
0	-0.734272	0.26882
0	-0.870306	-0.119705
0	0.332873	0.494817
0	0.721559	0.180863
0	-0.666908	-0.76918
0	0.2301	-0.38798
0	0.517991	-0.682424
0	-0.780093	-0.705775
0	-0.39044	0.396488
0	-0.151671	-0.426585
0	-0.680947	-1.021
0	-0.367635	0.307509
0	0.45871	0.576112
0	-0.0050498	-0.81781
0	1.03066	0.338659
0	-1.62871	0.193066
0	-2.46534	-0.969829
0	0.396762	0.256754
0	-0.590093	-0.662061
0	1.50046	0.946985
0	1.36144	-0.0361426
0	-2.22047	0.00526631
0	-0.622047	0.0236704
0	-1.16324	0.405168
0	-1.41483	-0.549036
0	-0.409617	0.416542
0	2.03698	0.420557
0	0.343782	0.251425
0	-0.356658	-0.0804321
0	-0.719927	-0.743336
0	-0.532417	0.612724
0	-1.12851	-0.17407
0	0.536199	-0.0872073
0	0.599352	0.334595
0	0.215798	-0.137698
0	-0.215142	-0.197784
0	1.48265	0.62074
0	-0.431578	-0.443503
0	1.8569	0.93387
0	-0.0888521	-0.744586
0	0.0343761	0.122665
0	-0.658192	-0.172909
0	-0.187524	0.215934
0	1.51903	1.36777
0	-0.338034	-0.323297
0	-2.45667	0.160012
0	0.965651	0.280664
0	1.4279	0.586633
0	0.455441	-0.114934
0	-2.48396	0.0259095
0	1.58523	-0.390699
0	-0.615606	0.244079
0	0.224646	-0.057407
0	0.551298	0.65898
0	0.146712	-0.78671
0	-1.36509	-0.355352
0	-0.0288605	-0.107744
0	-0.174035	0.290689
0	-0.334069	-0.841334
0	0.540818	-0.0690784
0	0.884808	-0.141106
0	0.49162	-0.183116
0	-0.655359	-1.08488
0	0.54947	0.454915
0	0.161117	-0.179885
0	1.0493	0.507282
0	0.247624	0.167354
0	0.0820549	0.90182
0	1.98739	0.603828
0	-0.356027	-0.651366
0	0.10396	-0.0116337
0	-1.70121	-1.27385
0	0.940901	0.399366
0	-1.26352	-0.110778
0	-0.757256	-0.253194
0	-0.316749	-0.250279
0	1.02026	0.435977
0	1.2053	0.572521
0	0.045882	-0.207841
0	0.531225	0.148773
0	-0.354191	0.200556
0	2.39329	-0.0535435
0	0.43822	-0.535436
0	1.67405	0.598298
0	0.688728	-0.163582
0	0.0182844	-0.171949
0	1.1598	0.473947
0	0.290164	0.672763
0	0.504771	-0.838151
0	1.12877	0.32968
0	-0.341916	-0.953905
0	0.526207	0.410195
0	1.88128	0.658192
0	0.44507	0.420472
0	1.33782	0.803482
0	-1.13349	-0.702247
0	1.8145	-0.0940142
0	-0.984528	-0.448734
0	-0.13718	-0.61052
0	-1.20378	-0.396511
0	1.65357	0.351015
0	0.426513	-0.225616
0	0.109192	-0.400558
0	-1.06461	-0.535973
0	0.782882	0.774578
0	-1.16041	-0.513201
0	0.0514646	-0.634174
0	-0.58732	-0.0887387
0	-0.671387	0.341433
0	-0.0462291	-0.133104
0	-0.051662	0.765618
0	0.450546	-0.119357
0	1.53557	0.197719
0	-0.24702	0.454195
0	-0.211297	-0.395197
0	0.0640511	0.105649
0	-0.91883	-0.285907
0	-1.11764	-1.27335
0	0.244727	-0.115684
0	-0.289372	-0.0194682
0	1.73694	0.646042
0	0.613709	-0.386337
0	1.142	0.736841
0	1.36786	0.691695
0	0.454637	0.50748
0	1.36399	0.307928
0	-1.1613	-0.155365
0	0.589756	0.0635053
0	2.19626	0.40397
0	1.18025	-0.0222008
0	-1.18992	-0.14449
0	2.07921	0.527937
0	-1.19662	0.361881
0	-0.225843	0.731502
0	0.502828	0.791095
0	-1.1094	-0.471021
0	0.671129	0.427147
0	0.380923	0.330478
0	0.225394	0.0227161
0	0.413921	0.0498468
0	-1.24793	-0.119328
0	0.262678	0.672357
0	1.59482	-0.0307862
0	-0.101214	0.0488029
0	-0.0334712	-0.739451
0	-0.270692	0.305803
0	-0.957987	-0.317045
0	2.34135	0.363941
0	-1.98422	-0.746689
0	-0.784	0.161764
0	0.710547	0.2949
0	0.376138	-0.567423
0	-0.182392	-1.01312
0	1.34542	0.169968
0	0.0765231	0.160466
0	0.864707	-0.393947
0	-0.905541	0.127085
0	-0.576828	-0.317031
0	0.129564	0.175789
0	0.865616	0.402807
0	-2.96201	-0.608132
0	0.957213	0.249018
0	0.341382	-0.555601
0	1.75708	0.0814485
0	-0.461126	0.151266
0	-1.54249	-0.348899
0	-0.748201	0.276068
0	1.55464	0.0983145
0	-1.1698	-1.38962
0	-0.831401	-0.225839
0	-1.36296	0.306792
0	1.31374	0.281642
0	1.78416	-0.0467236
0	-0.0148243	-0.180672
0	0.186236	0.347749
0	-1.14495	-0.525953
0	-0.365002	-0.127503
0	-0.87192	-0.143747
0	0.294506	0.555889
0	0.352921	-0.209854
0	-0.85515	-0.550857
0	-1.8547	-0.162305
0	0.0691488	-0.247408
0	-0.674481	0.257984
0	-0.198414	-0.255723
0	1.37792	0.278186
0	-0.660026	-0.282889
0	1.27445	0.703907
0	-0.783773	-0.585891
0	1.29275	0.191905
0	-0.914983	-0.331142
0	1.12163	0.240035
0	0.564739	-0.271497
0	0.676445	-0.344292
0	-0.510623	0.0288053
0	-0.804008	0.232605
0	1.14873	-0.120689
0	1.32789	0.102473
0	0.60332	0.345172
0	-1.0517	-1.32223
0	0.0225917	0.282803
0	-0.748215	-0.187729
0	0.554476	0.459104
0	0.161712	0.578889
0	1.50871	0.826884
0	-1.06177	-0.0860693
0	-0.253084	0.0729248
0	0.196498	0.485621
0	-0.154389	0.387134
0	-0.365644	-0.198857
0	-0.546582	-1.163
0	0.194705	-1.02837
0	1.07701	0.616901
0	0.116234	0.390721
0	-0.754789	-0.0864522
0	1.70443	0.758351
0	-0.159679	-0.143726
0	0.0127493	-0.280488
0	0.582124	0.0703812
0	1.28382	-0.09652
0	1.25061	0.101517
0	0.483498	-0.874046
0	0.0631948	0.362391
0	0.85104	0.199103
0	-0.759021	-0.641705
0	0.496814	0.451248
0	0.579428	0.477872
0	-0.700924	-0.0744894
0	0.165904	0.304091
0	0.788499	0.279318
0	0.45267	0.602001
0	-0.310238	0.0112257
0	0.0902584	0.337793
0	-1.40016	-0.234642
0	-0.396871	0.330506
0	0.574839	0.0646447
0	-0.62321	-0.194607
0	-1.17035	-0.32846
0	-0.393496	-0.0602504
0	0.0465798	-0.133837
0	0.52135	0.128017
0	-0.644469	-0.136887
0	0.374855	-0.380883
0	-0.506225	-0.179245
0	0.116305	-0.340547
0	-0.0961126	0.552309
0	1.09233	0.862213
0	1.02965	1.14006
0	-2.56523	-0.704192
0	-0.744475	0.200368
0	-0.475701	-0.271821
0	-3.14	-0.478715
0	-0.699109	-0.0196198
0	0.288651	-0.0124157
0	0.111128	0.351301
0	0.608131	1.13192
0	-0.406499	-0.74426
0	0.393741	0.00858841
0	-1.10286	0.459072
0	0.776646	0.290501
0	-0.949675	0.540252
0	0.136171	-0.482945
0	0.287124	-0.100798
0	0.680956	-0.0688767
0	-1.58131	-0.983395
0	-0.523693	-0.487908
0	-1.26426	0.14386
0	1.16508	0.805091
0	0.388445	0.332427
0	0.25819	-0.103232
0	-0.170977	0.00188822
0	-0.333935	0.550593
0	0.143575	-0.0154347
0	-1.23238	0.231116
0	-1.1629	-0.337724
0	-0.561449	0.128926
0	-0.343676	0.39162
0	-0.186805	0.610059
0	-0.65374	0.293287
0	-1.7415	0.0262867
0	1.88742	0.655578
0	-2.56342	-2.07318
0	-0.864507	-0.840844
0	-1.03004	-0.344289
0	0.0774262	0.437623
0	1.3826	0.740113
0	-0.263523	0.511514
0	-0.11472	0.598997
0	0.66367	0.882518
0	-0.901421	-0.453364
0	0.124108	0.264588
0	-1.8568	-0.0956265
0	0.347038	-0.07573
0	-2.26613	-0.645116
0	-1.99862	-0.885146
0	1.02667	0.644037
0	-0.879531	0.0847685
0	0.0619392	-0.61979
0	-0.342464	-0.430913
0	-0.347144	-0.274195
0	-0.386056	-0.412367
0	1.17708	0.300819
0	-0.412032	-0.0904406
0	0.0404874	0.293877
0	-0.910959	0.0980837
0	1.04838	-0.144602
0	1.51705	0.158589
0	-0.528183	0.51639
0	1.2391	-0.0223964
0	-0.957666	-0.418043
0	0.927275	-0.824515
0	0.256693	-0.302106
0	-0.748581	-0.0303594
0	1.4958	1.35519
0	0.617357	-0.388005
0	0.786182	-0.704659
0	0.593859	0.417241
0	0.533293	0.671
0	-1.1213	0.368345
0	-0.628564	0.542709
0	0.323821	-0.56085
0	0.319983	-0.849787
0	0.0687541	-0.175284
0	2.0156	-0.196949
0	-1.52041	-0.199624
0	-0.141326	0.282845
0	0.372953	0.43101
0	1.2896	-0.068383
0	0.416571	-0.339611
0	0.0502549	0.392914
0	0.565742	-0.113378
0	-0.196553	-0.1483
0	-0.487306	0.20846
0	-0.296813	-0.213726
0	-0.083251	-0.522628
0	0.157941	0.184401
0	-0.916622	-0.556057
0	-0.597585	0.385691
0	-0.415385	-0.569007
0	1.03181	0.582596
0	0.66592	0.708157
0	-0.682797	-0.648642
0	1.04051	-0.0156991
0	-0.187818	-0.259586
0	0.330845	-0.0834916
0	1.25977	-0.217302
0	1.75398	-0.0090103
0	0.233031	-0.132369
0	0.931227	-0.437141
0	0.414127	0.0303685
0	0.151117	-0.440561
0	0.745339	0.347948
0	0.522668	0.867626
0	-1.22527	-0.241405
0	-1.02401	0.174303
0	-0.323504	-0.820722
0	-0.774469	-1.05485
0	-0.0978899	0.0626409
0	-0.103905	-0.00181826
0	0.935874	1.03124
0	-1.21579	-0.734384
0	-0.439794	0.0998386
0	-1.05325	-0.648014
0	0.679585	0.00978318
0	1.1315	-0.219924
0	0.00112201	0.039176
0	0.471697	0.141074
0	-0.303392	-0.459229
0	0.944151	0.636546
0	0.506998	0.1155
0	0.64687	0.200988
0	0.449026	0.0434695
0	0.422204	0.763746
0	0.738961	0.369383
0	1.13836	0.0247776
0	-1.12752	-0.160673
0	0.849836	-0.145405
0	-0.611871	-0.135635
0	-1.61291	-1.00828
0	-0.882738	0.000706226
0	0.412159	-0.549167
0	0.318747	0.29347
0	0.94867	-0.0798373
0	1.58069	0.245454
0	-0.202516	0.40171
0	-0.765278	0.262219
0	-0.622719	-0.61083
0	0.164089	-0.517224
0	-0.225955	-0.0100794
0	0.234131	0.00718383
0	1.27616	0.288828
0	1.01154	0.51225
0	0.632676	0.190488
0	-0.220461	-0.436449
0	-1.97451	-1.58041
0	-0.237182	-0.271418
0	0.721029	0.273533
0	1.06395	0.836901
0	-1.4959	-2.18921
0	-0.477295	-0.595235
0	-0.140731	0.745834
0	0.56592	0.062042
0	-0.186724	-0.0876349
0	-2.20556	-0.725108
0	0.132981	-0.222276
0	0.622867	-0.0645753
0	0.298139	-0.551109
0	-0.0298207	0.56266
0	-0.992368	-1.01629
0	-0.91972	-0.445039
0	-2.50906	-0.287383
0	0.936454	0.0105709
0	-1.37612	-0.226029
0	0.514577	-0.322592
0	-0.094593	-0.0726334
0	-2.3203	-0.536754
0	1.5195	0.377628
0	-0.537878	0.0334414
0	-1.91557	-0.211083
0	0.235511	0.0184079
0	0.370584	0.426505
0	1.05607	0.506412
0	-0.0776394	0.268577
0	0.909784	0.189099
0	0.108357	-0.545839
0	-0.393739	0.272795
0	-0.145308	0.326762
0	1.01514	0.272589
0	0.55186	0.613966
0	-1.09412	-0.0695149
0	0.837746	0.376346
0	-0.636006	-0.288168
0	0.160885	0.632134
0	-0.523153	-0.256875
0	1.28073	0.239576
0	-2.19103	-0.777036
0	-0.330085	-0.0338021
0	-0.723111	-0.909274
0	0.543045	0.0636935
0	-2.79001	0.293666
0	-1.00929	-0.384383
0	0.0582534	0.618832
0	-0.922982	-0.13376
[truncated: 19,055 more rows]

## Sheet: Figure 8e–h
The proportion of variance in the g-factor explained uniquely by mental health and neuroimaging phenotypes stacked within dwMRI, rsMRI, sMRI, and across all MRI modalities, as well as the common effects between mental health and MRI modalities.
Modality	Unique: Mental Health	Unique: MRI	Common	Total Var.
dwMRI	0.0673	0.0478	0.023	0.1381
rsMRI	0.0628	0.0695	0.0267	0.159
sMRI	0.0605	0.0628	0.028	0.1513
All MRI Stacked	0.0455	0.1088	0.0421	0.1964

## Sheet: Figure 8i–l
The proportion of variance in the g-factor explained uniquely by mental health, neuroimaging phenotypes stacked within dwMRI, rsMRI, sMRI, and across all MRI modalities, and age and sex, as well as the common effects among all explanatory variables.
Unique: Mental Health + Age&Sex	Unique: dwMRI	Unique: Age&Sex	Common: Mental Health + dwMRI	Common: Mental Health + Age&Sex	Common: dwMRI + Age&Sex	Common: Mental Health + dwMRI + Age&Sex	Total Var.
0.0478	0.0079	0.0478	0.0029	0.0195	0.0399	0.0201	0.1859
Unique: Mental Health + Age&Sex	Unique: rsMRI	Unique: Age&Sex	Common: Mental Health + rsMRI	Common: Mental Health + Age&Sex	Common: rsMRI + Age&Sex	Common: Mental Health + rsMRI + Age&Sex
0.037	0.0501	0.0677	0.0134	0.0258	0.0194	0.0133	0.2267
Unique: Mental Health + Age&Sex	Unique: sMRI	Unique: Age&Sex	Common: Mental Health + sMRI	Common: Mental Health + Age&Sex	Common: sMRI + Age&Sex	Common: Mental Health + sMRI + Age&Sex
0.0474	0.0086	0.0316	0.0024	0.0131	0.0542	0.0251	0.1824
Unique: Mental Health + Age&Sex	Unique: all MRI	Unique: Age&Sex	Common: Mental Health + all MRI	Common: Mental Health + Age&Sex	Common: all MRI + Age&Sex	Common: Mental Health + all MRI + Age&Sex
0.0352	0.0529	0.0276	0.0145	0.0103	0.0559	0.0276	0.224
