# Supplementary material for: Multimodal MRI marker of cognition explains the association between cognition and mental health in the UK Biobank
Source: eLife. 2026 May 20;14:RP108109. doi: 10.7554/eLife.108109 (PMC13189626; doi:10.7554/eLife.108109)
Supplement: Supplementary file 1. [file elife-108109-supp1.xlsx]

## Sheet: g-factor variance
The unique variance of each cognitive score that is not explained by the g-factor, the variance of each score explained by the g-factor, and the proportion of covariance in cognitive scores captured by the g-factor
	Fold 1		Fold 2	Fold 2:	Fold 3	Fold 3:	Fold 4	Fold 4:	Fold 5	Fold 5:
	Unique Var.	Var. Exp.	Unique Var.	Var. Exp.	Unique Var.	Var. Exp.	Unique Var.	Var. Exp.	Unique Var.	Var. Exp.
RT	0.85	0.15	0.85	0.15	0.85	0.16	0.85	0.15	0.85	0.15
FIS	0.35	0.65	0.43	0.57	0.43	0.57	0.24	0.76	0.34	0.66
NM	0.77	0.23	0.77	0.23	0.77	0.23	0.78	0.22	0.78	0.22
TMT-num.	0.28	0.72	0.38	0.62	0.43	0.57	0.26	0.74	0.24	0.76
TMT-alphab.	0.46	0.54	0.44	0.56	0.42	0.58	0.45	0.55	0.46	0.54
SDS	0.58	0.42	0.55	0.45	0.56	0.44	0.57	0.43	0.58	0.43
PAL	0.65	0.35	0.74	0.27	0.74	0.26	0.65	0.35	0.67	0.33
Tower Rear.	0.55	0.45	0.02	0.98	-0.07	1.07	0.62	0.39	0.56	0.44
Matrix PC	0.64	0.37	0.64	0.36	0.64	0.37	0.64	0.36	0.63	0.37
Pairs Match.	0.89	0.11	0.89	0.11	0.9	0.11	0.89	0.11	0.89	0.11
Pict. Vocab.	0.62	0.38	0.62	0.38	0.62	0.38	0.67	0.33	0.62	0.38
Prosp. Mem.	0.86	0.14	0.88	0.12	0.86	0.14	0.86	0.14	0.86	0.14
% Var Exp.		0.38		0.4		0.4		0.38		0.38
Unique Var., the standardised residual variances (the unexplained or unique variance of each cognitive score); Var. Exp., the proportion of variance in each cognitive score explained by the g-factor (standardised loadings); % Var. Exp., the proportion of variance in the cognitive scores captured by the g-factor (∑Var. Exp. ÷ number of scores); RT, Reaction time; FIS, Fluid intelligence score; NM,…
