# Supplementary material for: Multimodal MRI marker of cognition explains the association between cognition and mental health in the UK Biobank
Source: eLife. 2026 May 20;14:RP108109. doi: 10.7554/eLife.108109 (PMC13189626; doi:10.7554/eLife.108109)
Supplement: Supplementary file 2. [file elife-108109-supp2.xlsx]

## Sheet: MRI performance
Out-of-sample predictive performance of dwMRI in the PLSR model averaged across five folds
dwMRI neuroimaging phenotypes	R2	Pearson r	MSE	MAE
aparc MSA I Connectome Streamline Count	0.052	0.226	0.569	0.596
aparc MSA I Connectome SIFT2	0.051	0.224	0.569	0.596
aparc a2009s MSA I Connectome Streamline Count	0.05	0.227	0.57	0.597
Schaefer7n200p MSA I Connectome Streamline Count	0.049	0.221	0.57	0.597
Schaefer7n200p MSA I Connectome SIFT2	0.048	0.221	0.571	0.598
aparc MSA I Connectome FA	0.048	0.214	0.571	0.597
aparc a2009s MSA I Connectome FA	0.047	0.213	0.572	0.597
aparc MSA I Connectome Mean Length	0.047	0.215	0.571	0.597
aparc a2009s MSA I Connectome SIFT2	0.046	0.215	0.572	0.598
L2 TBSS	0.045	0.207	0.576	0.601
Schaefer7n200p MSA I Connectome FA	0.045	0.21	0.573	0.598
aparc a2009s MSA I Connectome Mean Length	0.043	0.207	0.574	0.599
Glasser MSA IV Connectome SIFT2	0.043	0.204	0.574	0.599
Glasser MSA IV Connectome Streamline Count	0.043	0.202	0.574	0.599
L3 TBSS	0.042	0.2	0.578	0.602
ICVF TBSS	0.042	0.199	0.578	0.602
Glasser MSA IV Connectome FA	0.042	0.195	0.574	0.599
Schaefer7n500p MSA IV Connectome SIFT2	0.041	0.204	0.575	0.599
L1 TBSS	0.041	0.197	0.579	0.603
Schaefer7n500p MSA IV Connectome Streamline Count	0.041	0.202	0.575	0.599
FA TBSS	0.041	0.198	0.579	0.602
Glasser MSA I Connectome FA	0.04	0.191	0.575	0.6
Schaefer7n200p MSA I Connectome Mean Length	0.039	0.196	0.576	0.6
MD TBSS	0.039	0.194	0.58	0.603
MD Probabilistic	0.039	0.19	0.58	0.603
Glasser MSA I Connectome Streamline Count	0.037	0.191	0.577	0.6
L3 Probabilistic	0.037	0.186	0.582	0.604
Schaefer7n500p MSA IV Connectome FA	0.037	0.19	0.577	0.6
Glasser MSA I Connectome SIFT2	0.037	0.192	0.577	0.6
L2 Probabilistic	0.035	0.181	0.582	0.604
L1 Probabilistic	0.033	0.178	0.583	0.605
ISOVF TBSS	0.032	0.175	0.584	0.605
Glasser MSA IV Connectome Mean Length	0.031	0.181	0.58	0.602
Glasser MSA I Connectome Mean Length	0.03	0.178	0.581	0.602
OD TBSS	0.029	0.165	0.586	0.606
ICVF Probabilistic	0.029	0.165	0.586	0.606
MO TBSS	0.028	0.163	0.586	0.606
ISOVF Probabilistic	0.023	0.15	0.588	0.608
FA Probabilistic	0.022	0.141	0.59	0.609
Schaefer7n500p MSA IV Connectome Mean Length	0.018	0.145	0.587	0.606
OD Probabilistic	0.01	0.099	0.596	0.612
MO Probabilistic	0.006	0.076	0.598	0.613
rsMRI neuroimaging phenotypes	R2	Pearson r	MSE	MAE
55 IC Functional connectivity (Tangent)	0.088	0.302	0.552	0.587
Schaefer7n200p MSA I Functional connectivity (Full correlation)	0.071	0.271	0.557	0.589
Schaefer7n500p MSA IV Functional connectivity (Full correlation)	0.058	0.252	0.563	0.593
Glasser MSA I Functional connectivity (Full correlation)	0.057	0.249	0.564	0.593
21 IC Functional connectivity	0.054	0.232	0.571	0.599
Glasser MSA IV Functional connectivity (Full correlation)	0.053	0.243	0.566	0.595
aparc MSA I Functional connectivity (Full correlation)	0.052	0.232	0.567	0.596
aparc a2009s MSA I Functional connectivity (Full correlation)	0.051	0.233	0.569	0.597
55 IC Amplitudes	0.019	0.14	0.59	0.608
21 IC Amplitudes	0.013	0.112	0.594	0.611
sMRI neuroimaging phenotypes	R2	Pearson r	MSE	MAE
Subcortical volumetric subsegmentation	0.068	0.244	0.564	0.593
ASEG volume	0.059	0.235	0.568	0.595
FSL FAST	0.051	0.219	0.572	0.598
Whole-brain T1w/T2w	0.047	0.209	0.567	0.596
ASEG mean intensity	0.043	0.199	0.577	0.601
Desikan grey/white matter intensity	0.043	0.203	0.576	0.601
a2009s volume	0.034	0.18	0.582	0.604
a2009s mean thickness	0.027	0.161	0.586	0.606
Desikan-Killiany-Tourville volume	0.025	0.157	0.586	0.606
Desikan white matter mean thickness	0.024	0.151	0.587	0.607
Desikan-Killiany-Tourville mean thickness	0.024	0.152	0.587	0.606
a2009s area	0.024	0.155	0.587	0.606
Desikan white matter volume	0.023	0.152	0.587	0.607
FSL FIRST	0.023	0.146	0.588	0.607
BA ex-vivo volume	0.021	0.143	0.589	0.608
Desikan pial	0.021	0.144	0.589	0.608
Desikan-Killiany-Tourville area	0.018	0.132	0.59	0.608
BA ex-vivo mean thickness	0.018	0.132	0.591	0.608
Desikan white matter area	0.017	0.131	0.591	0.608
BA ex-vivo area	0.008	0.089	0.596	0.611
dwMRI, diffusion-weighted MRI; rsMRI, resting-state MRI; sMRI, T1-weighted (T1w) and T2-weighted (T2w) structural MRI; R2, coefficient of determination; MSE, mean squared error; MAE, mean absolute error; FA, fractional anisotropy; MD, mean diffusivity; MO, diffusion tensor mode; L1, L2, L3, eigenvalues of the diffusion tensor; OD, orientation dispersion index; ICVF, intracellular volume fraction;…
