# Supplementary material for: Multimodal MRI marker of cognition explains the association between cognition and mental health in the UK Biobank
Source: eLife. 2026 May 20;14:RP108109. doi: 10.7554/eLife.108109 (PMC13189626; doi:10.7554/eLife.108109)
Supplement: Supplementary file 3. [file elife-108109-supp3.xlsx]

## Sheet: Score distribution
Whole-sample distributions of mental health measures used as features in machine learning models (N = 21,077)
No	Variable	Mental Health Domain	Statistics / Values	Frequencies	Distribution Plot
1	Diagnoses: Anxiety/panic attacks	Clinical diagnoses (Non-cancer illness code, self-reported)	Min: 0	0: 20324 (96.4%)
			Mean: 0
			Max: 1	1: 753 (3.6%)
2	N-12	Neuroticism	Mean (SD): 3.3 (3)	13 distinct values
			min < med < max:
			0 < 3 < 12
			IQR (CV): 4 (0.9)
3	PCL-6	Traumatic events	Mean (SD): 7.8 (2.9)	24 distinct values
			min < med < max:
			6 < 6 < 29
			IQR (CV): 3 (0.4)
4	PHQ-9	Depression	Mean (SD): 2.6 (3.5)	28 distinct values
			min < med < max:
			0 < 1 < 27
			IQR (CV): 4 (1.4)
5	PDS	Depression	Min: 0	0: 16367 (77.7%)
			Mean: 0.2	1: 4710 (22.3%)
			Max: 1
6	RDS-4	Depression	Mean (SD): 5.1 (1.7)	13 distinct values
			min < med < max:
			4 < 5 < 16
			IQR (CV): 2 (0.3)
7	Diagnoses: Depression	Clinical diagnoses (Non-cancer illness code, self-reported)	Min: 0	0: 19144 (90.8%)
			Mean: 0.1
			Max: 1	1: 1933 (9.2%)
8	Self-harm: Ever thought life not worth living	Self-harm behaviours	Min: 0	0: 14661 (69.6%)
			Mean: 0.3	1: 6416 (30.4%)
			Max: 1
9	Ever attempted suicide	Self-harm behaviours	Min: 0	0: 20675 (98.1%)
			Mean: 0	1: 402 (1.9%)
			Max: 1
10	Ever self-harmed	Self-harm behaviours	Min: 0	0: 20238 (96.0%)
			Mean: 0	1: 839 (4.0%)
			Max: 1
11	Ever self-harmed (non-suicidal)	Self-harm behaviours	Min: 0	0: 20665 (98.0%)
			Mean: 0	1: 412 (2.0%)
			Max: 1
12	Unusual experience	Unusual/psychotic experiences	Min: 0	0: 20083 (95.3%)
			Mean: 0	1: 994 (4.7%)
			Max: 1
13	Recent unusual experience	Unusual/psychotic experiences	Min: 0	0: 20820 (98.8%)
			Mean: 0	1: 257 (1.2%)
			Max: 1
14	Repeated disturbing thoughts of stressful experience in past month	Traumatic events	Mean (SD): 0.4 (0.7)	0: 15611 (74.1%)
			min < med < max:	1: 4151 (19.7%)
			0 < 0 < 4	2: 691 (3.3%)
			IQR (CV): 1 (2)	3: 520 (2.5%)
				4: 104 (0.5%)
15	Felt very upset when reminded of stressful experience in past month	Traumatic events	Mean (SD): 0.5 (0.8)	0: 13692 (65.0%)
			min < med < max:	1: 5718 (27.1%)
			0 < 0 < 4	2: 941 (4.5%)
			IQR (CV): 1 (1.6)	3: 559 (2.7%)
				4: 167 (0.8%)
16	Avoided activities or situations because of previous stressful experience in past month	Traumatic events	Mean (SD): 0.3 (0.6)	0: 17051 (80.9%)
			min < med < max:	1: 2981 (14.1%)
			0 < 0 < 4	2: 547 (2.6%)
			IQR (CV): 0 (2.4)	3: 401 (1.9%)
				4: 97 (0.5%)
17	Frequency of “life not worth living” thoughts	Self-harm behaviours	Mean (SD): 0.5 (0.8)	0: 14661 (69.6%)
			min < med < max:	1: 2812 (13.3%)
			0 < 0 < 2	2: 3604 (17.1%)
			IQR (CV): 1 (1.6)
18	Lifetime frequency of contemplating self-harm	Self-harm behaviours	Mean (SD): 0.2 (0.6)	0: 17956 (85.2%)
			min < med < max:	1: 1573 (7.5%)
			0 < 0 < 2	2: 1548 (7.3%)
			IQR (CV): 0 (2.6)
19	Ever had prolonged feelings of sadness or depression	Depression	Min: 0	0: 9708 (46.1%)
			Mean: 0.5	1: 11369 (53.9%)
			Max: 1
20	Ever had prolonged loss of interest in normal activities	Depression	Min: 0	0: 13043 (61.9%)
			Mean: 0.4	1: 8034 (38.1%)
			Max: 1
21	Ever felt worried, tense, or anxious for most of a month or longer	Anxiety	Min: 0	0: 15908 (75.5%)
			Mean: 0.2	1: 5169 (24.5%)
			Max: 1
22	Ever worried more than most people would in a similar situation	Anxiety	Min: 0	0: 16689 (79.2%)
			Mean: 0.2	1: 4388 (20.8%)
			Max: 1
23	Ever addicted to any substance or behaviour	Addictions	Min: 0	0: 19896 (94.4%)
			Mean: 0.1	1: 1181 (5.6%)
			Max: 1
24	Ever believed in an unreal conspiracy against self	Unusual/psychotic experiences	Min: 0	0: 20937 (99.3%)
			Mean: 0	1: 140 (0.7%)
			Max: 1
25	Ever believed in unreal communications or signs	Unusual/psychotic experiences	Min: 0	0: 20944 (99.4%)
			Mean: 0	1: 133 (0.6%)
			Max: 1
26	Ever heard an unreal voice	Unusual/psychotic experiences	Min: 0	0: 20727 (98.3%)
			Mean: 0	1: 350 (1.7%)
			Max: 1
27	Ever seen an unreal vision	Unusual/psychotic experiences	Min: 0	0: 20432 (96.9%)
			Mean: 0	1: 645 (3.1%)
			Max: 1
28	Mood swings	Neuroticism	Min: 0	0: 14186 (67.3%)
			Mean: 0.3	1: 6891 (32.7%)
			Max: 1
29	Miserableness	Neuroticism	Min: 0	0: 14338 (68.0%)
			Mean: 0.3	1: 6739 (32.0%)
			Max: 1
30	Irritability	Neuroticism	Min: 0	0: 16056 (76.2%)
			Mean: 0.2	1: 5021 (23.8%)
			Max: 1
31	Sensitivity / hurt feelings	Neuroticism	Min: 0	0: 12287 (58.3%)
			Mean: 0.4	1: 8790 (41.7%)
			Max: 1
32	Fed-up feelings	Neuroticism	Min: 0	0: 15147 (71.9%)
			Mean: 0.3	1: 5930 (28.1%)
			Max: 1
33	Nervous feelings	Neuroticism	Min: 0	0: 17631 (83.7%)
			Mean: 0.2	1: 3446 (16.3%)
			Max: 1
34	Worrier / anxious feelings	Neuroticism	Min: 0	0: 11178 (53.0%)
			Mean: 0.5	1: 9899 (47.0%)
			Max: 1
35	Tense / “highly strung”	Neuroticism	Min: 0	0: 18864 (89.5%)
			Mean: 0.1	1: 2213 (10.5%)
			Max: 1
36	Worry too long after embarrassment	Neuroticism	Min: 0	0: 11600 (55.0%)
			Mean: 0.4	1: 9477 (45.0%)
			Max: 1
37	Suffer from “nerves”	Neuroticism	Min: 0	0: 18348 (87.1%)
			Mean: 0.1	1: 2729 (12.9%)
			Max: 1
38	Loneliness, isolation	Neuroticism	Min: 0	0: 18362 (87.1%)
			Mean: 0.1	1: 2715 (12.9%)
			Max: 1
39	Guilty feelings	Neuroticism	Min: 0	0: 15978 (75.8%)
			Mean: 0.2	1: 5099 (24.2%)
			Max: 1
40	Risk taking	Neuroticism	Min: 0	0: 15911 (75.5%)
			Mean: 0.2	1: 5166 (24.5%)
			Max: 1
41	Frequency of depressed mood in last 2 weeks	Depression	Mean (SD): 1.2 (0.5)	1: 17559 (83.3%)
			min < med < max:	2: 3020 (14.3%)
			1 < 1 < 4	3: 308 (1.5%)
			IQR (CV): 0 (0.4)	4: 190 (0.9%)
42	Frequency of unenthusiasm/disinterest in the last 2 weeks	Depression	Mean (SD): 1.2 (0.5)	1: 18031 (85.5%)
			min < med < max:	2: 2553 (12.1%)
			1 < 1 < 4	3: 308 (1.5%)
			IQR (CV): 0 (0.4)	4: 185 (0.9%)
43	Frequency of tenseness/restlessness in last 2 weeks	Depression	Mean (SD): 1.2 (0.5)	1: 17150 (81.4%)
			min < med < max:	2: 3504 (16.6%)
			1 < 1 < 4	3: 266 (1.3%)
			IQR (CV): 0 (0.4)	4: 157 (0.7%)
44	Frequency of tiredness/lethargy in last 2 weeks	Depression	Mean (SD): 1.5 (0.7)	1: 11831 (56.1%)
			min < med < max:	2: 7698 (36.5%)
			1 < 1 < 4	3: 824 (3.9%)
			IQR (CV): 1 (0.5)	4: 724 (3.4%)
45	Seen a psychiatrist for nerves, anxiety, tension, or depression	Depression	Min: 0	0: 19200 (91.1%)
			Mean: 0.1	1: 1877 (8.9%)
			Max: 1
46	Seen a doctor (GP) for nerves, anxiety, tension, or depression	Depression	Min: 0	0: 14774 (70.1%)
			Mean: 0.3	1: 6303 (29.9%)
			Max: 1
47	Ever depressed for a whole week	Depression	Mean (SD): 0.6 (0.6)	0: 9985 (47.4%)
			min < med < max:	1: 10727 (50.9%)
			0 < 1 < 3	3: 365 (1.7%)
			IQR (CV): 1 (1.1)
48	Ever unenthusiastic/	Depression	Min: 0	0: 14705 (69.8%)
	disinterested for a whole week		Mean: 0.3	1: 6372 (30.2%)
			Max: 1
49	Ever highly irritable/	Mania	Min: 0	0: 18868 (89.5%)
	argumentative for 2 days		Mean: 0.1	1: 2209 (10.5%)
			Max: 1
50	Ever manic/hyper for 2 days	Mania	Min: 0	0: 20508 (97.3%)
			Mean: 0	1: 569 (2.7%)
			Max: 1
51	Mental and behavioural disorders	Clinical diagnoses (ICD-10 code: F)	Mean (sd): 0 (0.1)	0: 20934 (99.3%)
			min < med < max:	1: 129 (0.6%)
			0 < 0 < 3	2: 12 (0.1%)
			IQR (CV): 0 (12.7)	3: 2 (0.0%)
52	Diseases of the nervous system	Clinical diagnoses (ICD-10 code: G)	Mean (sd): 0.1 (0.2)	0: 19879 (94.3%)
			min < med < max:	1: 1144 (5.4%)
			0 < 0 < 2	2: 54 (0.3%)
			IQR (CV): 0 (4.2)
53	Diagnoses: Neurological problems, nervous system injury, epilepsy	Clinical diagnoses (Non-cancer illness code, self-reported)	Min: 0	0: 20659 (98.0%)
			Mean: 0
			Max: 1	1: 418 (2.0%)
54	Diagnoses: Stress, insomnia, migraine, nervous/mental problems	Clinical diagnoses (Non-cancer illness code, self-reported)	Min: 0	0: 19349 (91.8%)
			Mean: 0.1
			Max: 1	1: 1728 (8.2%)
55	Ever had a period of mania/excitability	Mania	Min: 0	0: 20232 (96.0%)
			Mean: 0	1: 845 (4.0%)
			Max: 1
56	Ever had a period of extreme irritability	Mania	Min: 0	0: 15705 (74.5%)
			Mean: 0.3	1: 5372 (25.5%)
			Max: 1
57	Recent feelings of inadequacy	Depression	Mean (SD): 1.2 (0.6)	1: 17073 (81.0%)
			min < med < max:	2: 3245 (15.4%)
			1 < 1 < 4	3: 393 (1.9%)
			IQR (CV): 0 (0.5)	4: 366 (1.7%)
58	Recent trouble concentrating on things	Depression	Mean (SD): 1.2 (0.5)	1: 17405 (82.6%)
			min < med < max:	2: 3021 (14.3%)
			1 < 1 < 4	3: 378 (1.8%)
			IQR (CV): 0 (0.4)	4: 273 (1.3%)
59	Recent feelings of depression	Depression	Mean (SD): 1.2 (0.5)	1: 16787 (79.6%)
			min < med < max:	2: 3675 (17.4%)
			1 < 1 < 4	3: 400 (1.9%)
			IQR (CV): 0 (0.4)	4: 215 (1.0%)
60	Recent poor appetite or overeating	Depression	Mean (SD): 1.2 (0.6)	1: 17549 (83.3%)
			min < med < max:	2: 2582 (12.3%)
			1 < 1 < 4	3: 491 (2.3%)
			IQR (CV): 0 (0.5)	4: 455 (2.2%)
61	Recent thoughts of suicide or self-harm	Depression	Mean (SD): 1 (0.3)	1: 20282 (96.2%)
			min < med < max:	2: 681 (3.2%)
			1 < 1 < 4	3: 64 (0.3%)
			IQR (CV): 0 (0.2)	4: 50 (0.2%)
62	Recent lack of interest or pleasure in doing things	Depression	Mean (SD): 1.2 (0.5)	1: 17456 (82.8%)
			min < med < max:	2: 2928 (13.9%)
			1 < 1 < 4	3: 429 (2.0%)
			IQR (CV): 0 (0.4)	4: 264 (1.3%)
63	Trouble falling or staying asleep, or sleeping too much	Depression	Mean (SD): 1.7 (0.9)	1: 11002 (52.2%)
			min < med < max:	2: 7210 (34.2%)
			1 < 1 < 4	3: 1366 (6.5%)
			IQR (CV): 1 (0.5)	4: 1499 (7.1%)
64	Recent changes in speed/amount of moving or speaking	Depression	Mean (SD): 1.1 (0.3)	1: 20085 (95.3%)
			min < med < max:	2: 798 (3.8%)
			1 < 1 < 4	3: 128 (0.6%)
			IQR (CV): 0 (0.3)	4: 66 (0.3%)
65	Recent feelings of tiredness or low energy	Depression	Mean (SD): 1.6 (0.8)	1: 11169 (53.0%)
			min < med < max:	2: 7964 (37.8%)
			1 < 1 < 4	3: 1029 (4.9%)
			IQR (CV): 1 (0.5)	4: 915 (4.3%)
66	Depression ever	Depression	Min: 0	0: 16248 (77.1%)
			Mean: 0.2	1: 4829 (22.9%)
			Max: 1
67	Subthreshold depression	Depression	Min: 0	0: 13473 (63.9%)
			Mean: 0.4
			Max: 1	1: 7604 (36.1%)
68	Bipolar I	Mania	Min: 0	0: 20979 (99.5%)
			Mean: 0	1: 98 (0.5%)
			Max: 1
69	Bipolar II	Mania	Min: 0	0: 20903 (99.2%)
			Mean: 0	1: 174 (0.8%)
			Max: 1
70	Depression single episode	Depression	Min: 0	0: 19221 (91.2%)
			Mean: 0.1	1: 1856 (8.8%)
			Max: 1
71	Recurrent depression	Depression	Min: 0	0: 18334 (87.0%)
			Mean: 0.1	1: 2743 (13.0%)
			Max: 1
72	Depression triggered by loss	Depression	Min: 0	0: 19622 (93.1%)
			Mean: 0.1	1: 1455 (6.9%)
			Max: 1
73	Current depression	Depression	Min: 0	0: 20764 (98.5%)
			Mean: 0	1: 313 (1.5%)
			Max: 1
74	Current severe depression	Depression	Min: 0	0: 20873 (99.0%)
			Mean: 0	1: 204 (1.0%)
			Max: 1
75	Recent easy annoyance or irritability	Anxiety	Mean (SD): 1.3 (0.6)	1: 15570 (73.9%)
			min < med < max:	2: 4879 (23.1%)
			1 < 1 < 4	3: 369 (1.8%)
			IQR (CV): 1 (0.4)	4: 259 (1.2%)
76	Recent feelings of nervousness or anxiety	Anxiety	Mean (SD): 1.3 (0.6)	1: 15515 (73.6%)
			min < med < max:	2: 4745 (22.5%)
			1 < 1 < 4	3: 436 (2.1%)
			IQR (CV): 1 (0.5)	4: 381 (1.8%)
77	Recent inability to stop or control worrying	Anxiety	Mean (SD): 1.3 (0.6)	1: 16568 (78.6%)
			min < med < max:	2: 3694 (17.5%)
			1 < 1 < 4	3: 407 (1.9%)
			IQR (CV): 0 (0.5)	4: 408 (1.9%)
78	Recent feelings of foreboding	Anxiety	Mean (SD): 1.2 (0.5)	1: 17842 (84.7%)
			min < med < max:	2: 2616 (12.4%)
			1 < 1 < 4	3: 330 (1.6%)
			IQR (CV): 0 (0.4)	4: 289 (1.4%)
79	Recent trouble relaxing	Anxiety	Mean (SD): 1.3 (0.7)	1: 15371 (72.9%)
			min < med < max:	2: 4620 (21.9%)
			1 < 1 < 4	3: 529 (2.5%)
			IQR (CV): 1 (0.5)	4: 557 (2.6%)
80	Recent restlessness	Anxiety	Mean (SD): 1.1 (0.4)	1: 18739 (88.9%)
			min < med < max:	2: 1898 (9.0%)
			1 < 1 < 4	3: 266 (1.3%)
			IQR (CV): 0 (0.4)	4: 174 (0.8%)
81	Recent worrying too much about different things	Anxiety	Mean (SD): 1.4 (0.6)	1: 14840 (70.4%)
			min < med < max:	2: 5259 (25.0%)
			1 < 1 < 4	3: 499 (2.4%)
			IQR (CV): 1 (0.5)	4: 479 (2.3%)
82	GAD-7	Anxiety	Mean (SD): 1.9 (3.2)	22 distinct values
			min < med < max:
			0 < 0 < 21
			IQR (CV): 3 (1.6)
83	GAD ever	Anxiety	Min: 0	0: 19690 (93.4%)
			Mean: 0.1	1: 1387 (6.6%)
			Max: 1
84	Current GAD	Anxiety	Min: 0	0: 20779 (98.6%)
			Mean: 0	1: 298 (1.4%)
			Max: 1
85	Current GAD mild	Anxiety	Min: 0	0: 20667 (98.1%)
			Mean: 0	1: 410 (1.9%)
			Max: 1
86	Current GAD moderate	Anxiety	Min: 0	0: 20909 (99.2%)
			Mean: 0	1: 168 (0.8%)
			Max: 1
87	Current GAD severe	Anxiety	Min: 0	0: 20947 (99.4%)
			Mean: 0	1: 130 (0.6%)
			Max: 1
88	PTSD	Traumatic events	Min: 0	0: 19926 (94.5%)
			Mean: 0.1	1: 1151 (5.5%)
			Max: 1
89	Amount of alcohol drunk on a typical drinking day	Alcohol and cannabis use	Mean (SD): 0.8 (1.1)	0: 10819 (51.3%)
			min < med < max:	1: 5709 (27.1%)
			0 < 0 < 4	2: 2560 (12.1%)
			IQR (CV): 1 (1.3)	3: 1402 (6.7%)
				4: 587 (2.8%)
90	Frequency of drinking alcohol	Alcohol and cannabis use	Mean (SD): 2.7 (1.2)	0: 1350 (6.4%)
			min < med < max:	1: 2450 (11.6%)
			0 < 3 < 4	2: 3957 (18.8%)
			IQR (CV): 2 (0.4)	3: 6694 (31.8%)
				4: 6626 (31.4%)
91	Frequency of consuming six or more units of alcohol	Alcohol and cannabis use	Mean (SD): 1 (1.2)	0: 10321 (49.0%)
			min < med < max:	1: 5279 (25.0%)
			0 < 1 < 4	2: 1969 (9.3%)
			IQR (CV): 2 (1.2)	3: 2830 (13.4%)
				4: 678 (3.2%)
92	(log)AUDIT	Alcohol and cannabis use	Mean (SD): 1.6 (0.7)	35 distinct values
			min < med < max:
			0 < 1.6 < 3.6
			IQR (CV): 1 (0.4)
93	(log)AUDIT-C	Alcohol and cannabis use	Mean (SD): 1.5 (0.6)	13 distinct values
			min < med < max:
			0 < 1.6 < 2.6
			IQR (CV): 0.8 (0.4)
94	(log)AUDIT-P	Alcohol and cannabis use	Mean (SD): 0.3 (0.7)	23 distinct values
			min < med < max:
			0 < 0 < 3.1
			IQR (CV): 0 (2)
95	Hazardous alcohol use (AUDIT ≥ 8)	Alcohol and cannabis use	Min: 0	0: 15994 (75.9%)
			Mean: 0.2	1: 5083 (24.1%)
			Max: 1
96	Alcohol dependence (AUDIT ≥ 15)	Alcohol and cannabis use	Min: 0	0: 20038 (95.1%)
			Mean: 0	1: 1039 (4.9%)
			Max: 1
97	Felt hated by family member as a child	Traumatic events	Mean (SD): 1.3 (0.7)	1: 17886 (84.9%)
			min < med < max:	2: 1377 (6.5%)
			1 < 1 < 5	3: 1305 (6.2%)
			IQR (CV): 0 (0.6)	4: 284 (1.3%)
				5: 225 (1.1%)
98	Physically abused by family as a child	Traumatic events	Mean (SD): 1.3 (0.7)	1: 17061 (80.9%)
			min < med < max:	2: 2416 (11.5%)
			1 < 1 < 5	3: 1333 (6.3%)
			IQR (CV): 0 (0.5)	4: 162 (0.8%)
				5: 105 (0.5%)
99	Felt loved as a child	Traumatic events	Mean (SD): 4.2 (1)	1: 270 (1.3%)
			min < med < max:	2: 904 (4.3%)
			1 < 5 < 5	3: 3436 (16.3%)
			IQR (CV): 1 (0.2)	4: 5319 (25.2%)
				5: 11148 (52.9%)
100	Sexually molested as a child	Traumatic events	Mean (SD): 1.1 (0.5)	1: 19165 (90.9%)
			min < med < max:	2: 1085 (5.1%)
			1 < 1 < 5	3: 664 (3.2%)
			IQR (CV): 0 (0.4)	4: 90 (0.4%)
				5: 73 (0.3%)
101	Someone to take to a doctor when needed as a child	Traumatic events	Mean (SD): 4.8 (0.7)	1: 369 (1.8%)
			min < med < max:	2: 147 (0.7%)
			1 < 5 < 5	3: 473 (2.2%)
			IQR (CV): 0 (0.1)	4: 1875 (8.9%)
				5: 18213 (86.4%)
102	Ever sought or received professional help for mental distress	Mental distress	Min: 0	0: 12990 (61.6%)
			Mean: 0.4	1: 8087 (38.4%)
			Max: 1
103	Ever suffered mental distress preventing usual activities	Mental distress	Min: 0	0: 14265 (67.7%)
			Mean: 0.3	1: 6812 (32.3%)
			Max: 1
104	Belittlement by partner or ex-partner as an adult	Traumatic events	Mean (SD): 1.4 (0.9)	1: 16092 (76.3%)
			min < med < max:	2: 2124 (10.1%)
			1 < 1 < 5	3: 2051 (9.7%)
			IQR (CV): 0 (0.6)	4: 440 (2.1%)
				5: 370 (1.8%)
105	Been in a confiding relationship as an adult	Traumatic events	Mean (SD): 4.1 (1.2)	1: 1472 (7.0%)
			min < med < max:	2: 925 (4.4%)
			1 < 5 < 5	3: 3568 (16.9%)
			IQR (CV): 2 (0.3)	4: 3594 (17.1%)
				5: 11518 (54.6%)
106	Physical violence by a partner or ex-partner as an adult	Traumatic events	Mean (SD): 1.2 (0.6)	1: 18528 (87.9%)
			min < med < max:	2: 1343 (6.4%)
			1 < 1 < 5	3: 893 (4.2%)
			IQR (CV): 0 (0.5)	4: 137 (0.6%)
				5: 176 (0.8%)
107	Sexual interference by a partner or ex-partner without consent as an adult	Traumatic events	Mean (SD): 1.1 (0.4)	1: 19963 (94.7%)
			min < med < max:	2: 645 (3.1%)
			1 < 1 < 5	3: 363 (1.7%)
			IQR (CV): 0 (0.4)	4: 49 (0.2%)
				5: 57 (0.3%)
108	Able to pay rent/mortgage as an adult	Traumatic events	Mean (SD): 4.8 (0.8)	1: 590 (2.8%)
			min < med < max:	2: 98 (0.5%)
			1 < 5 < 5	3: 416 (2.0%)
			IQR (CV): 0 (0.2)	4: 1351 (6.4%)
				5: 18622 (88.4%)
109	Been in a serious accident believed to be life-threatening	Traumatic events	Mean (SD): 0.1 (0.3)	0: 19056 (90.4%)
			min < med < max:	1: 1971 (9.4%)
			0 < 0 < 2	2: 50 (0.2%)
			IQR (CV): 0 (3.1)
110	Been involved in combat or exposed to war-zone	Traumatic events	Mean (SD): 0 (0.2)	0: 20322 (96.4%)
			min < med < max:	1: 741 (3.5%)
			0 < 0 < 2	2: 14 (0.1%)
			IQR (CV): 0 (5.2)
111	Diagnosed with a life-threatening illness	Traumatic events	Mean (SD): 0.1 (0.4)	0: 18727 (88.9%)
			min < med < max:	1: 2074 (9.8%)
			0 < 0 < 2	2: 276 (1.3%)
			IQR (CV): 0 (3)
112	Victim of physically violent crime	Traumatic events	Mean (SD): 0.2 (0.4)	0: 16838 (79.9%)
			min < med < max:	1: 4147 (19.7%)
			0 < 0 < 2	2: 92 (0.4%)
			IQR (CV): 0 (2)
113	Witnessed sudden violent death	Traumatic events	Mean (SD): 0.2 (0.4)	0: 18003 (85.4%)
			min < med < max:	1: 2956 (14.0%)
			0 < 0 < 2	2: 118 (0.6%)
			IQR (CV): 0 (2.5)
114	Victim of sexual assault	Traumatic events	Mean (SD): 0.1 (0.4)	0: 17950 (85.2%)
			min < med < max:	1: 3104 (14.7%)
			0 < 0 < 2	2: 23 (0.1%)
			IQR (CV): 0 (2.4)
115	Physical alcohol dependence ever	Addictions	Min: 0	0: 20989 (99.6%)
			Mean: 0	1: 88 (0.4%)
			Max: 1
116	Substance addiction	Addictions	Min: 0	0: 20513 (97.3%)
			Mean: 0	1: 564 (2.7%)
			Max: 1
117	Current addiction	Addictions	Min: 0	0: 20698 (98.2%)
			Mean: 0	1: 379 (1.8%)
			Max: 1
118	Cannabis ever	Alcohol and cannabis use	Min: 0	0: 16058 (76.2%)
			Mean: 0.2	1: 5019 (23.8%)
			Max: 1
119	Lifetime frequency of taking cannabis	Alcohol and cannabis use	Mean (SD): 0.5 (1)	0: 16058 (76.2%)
			min < med < max:	1: 2213 (10.5%)
			0 < 0 < 4	2: 1310 (6.2%)
			IQR (CV): 0 (2.1)	3: 977 (4.6%)
				4: 519 (2.5%)
120	Cannabis daily	Alcohol and cannabis use	Min: 0	0: 20804 (98.7%)
			Mean: 0	1: 273 (1.3%)
			Max: 1
121	Childhood adverse events	Traumatic events	Min: 0	0: 11417 (54.2%)
			Mean: 0.5	1: 9660 (45.8%)
			Max: 1
122	Adult adverse events	Traumatic events	Min: 0	0: 10486 (49.8%)
			Mean: 0.5	1: 10591 (50.2%)
			Max: 1
123	Catastrophic trauma	Traumatic events	Min: 0	0: 10686 (50.7%)
			Mean: 0.5	1: 10391 (49.3%)
			Max: 1
124	Any distress	Mental distress	Min: 0	0: 10100 (47.9%)
			Mean: 0.5
			Max: 1	1: 10977 (52.1%)
125	Happiness	Happiness and subjective well-being	Mean (SD): 4.5 (0.7)	1: 20 (0.1%)
			min < med < max:	2: 96 (0.5%)
			1 < 5 < 6	3: 672 (3.2%)
			IQR (CV): 1 (0.2)	4: 9578 (45.4%)
				5: 9381 (44.5%)
				6: 1330 (6.3%)
126	Health satisfaction	Happiness and subjective well-being	Mean (SD): 4.4 (0.8)	1: 63 (0.3%)
			min < med < max:	2: 281 (1.3%)
			1 < 4 < 6	3: 1290 (6.1%)
			IQR (CV): 1 (0.2)	4: 9322 (44.2%)
				5: 8741 (41.5%)
				6: 1380 (6.5%)
127	Family relationship satisfaction	Happiness and subjective well-being	Mean (SD): 4.8 (0.8)	1: 73 (0.3%)
			min < med < max:	2: 173 (0.8%)
			1 < 5 < 6	3: 855 (4.1%)
			IQR (CV): 1 (0.2)	4: 5667 (26.9%)
				5: 10204 (48.4%)
				6: 4105 (19.5%)
128	Friendships satisfaction	Happiness and subjective well-being	Mean (SD): 4.8 (0.7)	1: 28 (0.1%)
			min < med < max:	2: 69 (0.3%)
			1 < 5 < 6	3: 498 (2.4%)
			IQR (CV): 1 (0.2)	4: 6262 (29.7%)
				5: 11399 (54.1%)
				6: 2821 (13.4%)
129	Financial situation satisfaction	Happiness and subjective well-being	Mean (SD): 4.8 (0.8)	1: 73 (0.3%)
			min < med < max:	2: 169 (0.8%)
			1 < 5 < 6	3: 711 (3.4%)
			IQR (CV): 1 (0.2)	4: 6437 (30.5%)
				5: 10155 (48.2%)
				6: 3532 (16.8%)
130	General happiness	Happiness and subjective well-being	Mean (SD): 4.6 (0.8)	1: 41 (0.2%)
			min < med < max:	2: 143 (0.7%)
			1 < 5 < 6	3: 873 (4.1%)
			IQR (CV): 1 (0.2)	4: 8033 (38.1%)
				5: 9784 (46.4%)
				6: 2203 (10.5%)
131	General happiness with own health	Happiness and subjective well-being	Mean (SD): 4.5 (0.9)	1: 139 (0.7%)
			min < med < max:	2: 326 (1.5%)
			1 < 5 < 6	3: 1523 (7.2%)
			IQR (CV): 1 (0.2)	4: 8291 (39.3%)
				5: 8597 (40.8%)
				6: 2201 (10.4%)
132	Belief that own life is meaningful	Happiness and subjective well-being	Mean (SD): 3.7 (0.8)	1: 278 (1.3%)
			min < med < max:	2: 1145 (5.4%)
			1 < 4 < 5	3: 5398 (25.6%)
			IQR (CV): 1 (0.2)	4: 11504 (54.6%)
				5: 2752 (13.1%)
133	Wellbeing	Happiness and subjective well-being	Mean (SD): 12.8 (1.9)	15 distinct values
			min < med < max:
			3 < 13 < 17
			IQR (CV): 2 (0.1)
SD, standard deviation; IQR, interquartile range; CV, coefficient of variation; N-12, Eysenck Neuroticism score; PTSD, post-traumatic stress disorder; PCL-6, PTSD Checklist; PHQ-9, Patient Health Questionnaire score; PDS, Probable Depression Status; RDS-4, Recent Depressive Symptoms; AUDIT, Alcohol Use Disorders Identification Test; GAD-7, Generalised Anxiety Disorder score; GP, general practitio…
