# Supplementary material for: Multimodal MRI marker of cognition explains the association between cognition and mental health in the UK Biobank
Source: eLife. 2026 May 20;14:RP108109. doi: 10.7554/eLife.108109 (PMC13189626; doi:10.7554/eLife.108109)
Supplement: Supplementary file 4. [file elife-108109-supp4.xlsx]

## Sheet: Neuroimaging phenotypes
UK Biobank neuroimaging variables included in the study
	Neuroimaging feature	Instance	Modality: Brain neuroimaging phenotype
25888	Volume of grey matter in Amygdala (left)	2	sMRI: Regional grey matter volumes (FAST) n=139
25889	Volume of grey matter in Amygdala (right)
25822	Volume of grey matter in Angular Gyrus (left)
25823	Volume of grey matter in Angular Gyrus (right)
25892	Volume of grey matter in Brain-Stem
25880	Volume of grey matter in Caudate (left)
25881	Volume of grey matter in Caudate (right)
25864	Volume of grey matter in Central Opercular Cortex (left)
25865	Volume of grey matter in Central Opercular Cortex (right)
25838	Volume of grey matter in Cingulate Gyrus, anterior division (left)
25839	Volume of grey matter in Cingulate Gyrus, anterior division (right)
25840	Volume of grey matter in Cingulate Gyrus, posterior division (left)
25841	Volume of grey matter in Cingulate Gyrus, posterior division (right)
25900	Volume of grey matter in Crus I Cerebellum (left)
25902	Volume of grey matter in Crus I Cerebellum (right)
25901	Volume of grey matter in Crus I Cerebellum (vermis)
25903	Volume of grey matter in Crus II Cerebellum (left)
25905	Volume of grey matter in Crus II Cerebellum (right)
25904	Volume of grey matter in Crus II Cerebellum (vermis)
25844	Volume of grey matter in Cuneal Cortex (left)
25845	Volume of grey matter in Cuneal Cortex (right)
25830	Volume of grey matter in Frontal Medial Cortex (left)
25831	Volume of grey matter in Frontal Medial Cortex (right)
25862	Volume of grey matter in Frontal Operculum Cortex (left)
25863	Volume of grey matter in Frontal Operculum Cortex (right)
25846	Volume of grey matter in Frontal Orbital Cortex (left)
25847	Volume of grey matter in Frontal Orbital Cortex (right)
25782	Volume of grey matter in Frontal Pole (left)
25783	Volume of grey matter in Frontal Pole (right)
25870	Volume of grey matter in Heschl's Gyrus (includes H1 and H2) (left)
25871	Volume of grey matter in Heschl's Gyrus (includes H1 and H2) (right)
25886	Volume of grey matter in Hippocampus (left)
25887	Volume of grey matter in Hippocampus (right)
25893	Volume of grey matter in I-IV Cerebellum (left)
25894	Volume of grey matter in I-IV Cerebellum (right)
25915	Volume of grey matter in IX Cerebellum (left)
25917	Volume of grey matter in IX Cerebellum (right)
25916	Volume of grey matter in IX Cerebellum (vermis)
25792	Volume of grey matter in Inferior Frontal Gyrus, pars opercularis (left)
25793	Volume of grey matter in Inferior Frontal Gyrus, pars opercularis (right)
25790	Volume of grey matter in Inferior Frontal Gyrus, pars triangularis (left)
25791	Volume of grey matter in Inferior Frontal Gyrus, pars triangularis (right)
25808	Volume of grey matter in Inferior Temporal Gyrus, anterior division (left)
25809	Volume of grey matter in Inferior Temporal Gyrus, anterior division (right)
25810	Volume of grey matter in Inferior Temporal Gyrus, posterior division (left)
25811	Volume of grey matter in Inferior Temporal Gyrus, posterior division (right)
25812	Volume of grey matter in Inferior Temporal Gyrus, temporooccipital part (left)
25813	Volume of grey matter in Inferior Temporal Gyrus, temporooccipital part (right)
25784	Volume of grey matter in Insular Cortex (left)
25785	Volume of grey matter in Insular Cortex (right)
25828	Volume of grey matter in Intracalcarine Cortex (left)
25829	Volume of grey matter in Intracalcarine Cortex (right)
25832	Volume of grey matter in Juxtapositional Lobule Cortex (formerly Supplementary Motor Cortex) (left)
25833	Volume of grey matter in Juxtapositional Lobule Cortex (formerly Supplementary Motor Cortex) (right)
25826	Volume of grey matter in Lateral Occipital Cortex, inferior division (left)
25827	Volume of grey matter in Lateral Occipital Cortex, inferior division (right)
25824	Volume of grey matter in Lateral Occipital Cortex, superior division (left)
25825	Volume of grey matter in Lateral Occipital Cortex, superior division (right)
25852	Volume of grey matter in Lingual Gyrus (left)
25853	Volume of grey matter in Lingual Gyrus (right)
25788	Volume of grey matter in Middle Frontal Gyrus (left)
25789	Volume of grey matter in Middle Frontal Gyrus (right)
25802	Volume of grey matter in Middle Temporal Gyrus, anterior division (left)
25803	Volume of grey matter in Middle Temporal Gyrus, anterior division (right)
25804	Volume of grey matter in Middle Temporal Gyrus, posterior division (left)
25805	Volume of grey matter in Middle Temporal Gyrus, posterior division (right)
25806	Volume of grey matter in Middle Temporal Gyrus, temporooccipital part (left)
25807	Volume of grey matter in Middle Temporal Gyrus, temporooccipital part (right)
25860	Volume of grey matter in Occipital Fusiform Gyrus (left)
25861	Volume of grey matter in Occipital Fusiform Gyrus (right)
25876	Volume of grey matter in Occipital Pole (left)
25877	Volume of grey matter in Occipital Pole (right)
25884	Volume of grey matter in Pallidum (left)
25885	Volume of grey matter in Pallidum (right)
25836	Volume of grey matter in Paracingulate Gyrus (left)
25837	Volume of grey matter in Paracingulate Gyrus (right)
25848	Volume of grey matter in Parahippocampal Gyrus, anterior division (left)
25849	Volume of grey matter in Parahippocampal Gyrus, anterior division (right)
25850	Volume of grey matter in Parahippocampal Gyrus, posterior division (left)
25851	Volume of grey matter in Parahippocampal Gyrus, posterior division (right)
25866	Volume of grey matter in Parietal Operculum Cortex (left)
25867	Volume of grey matter in Parietal Operculum Cortex (right)
25868	Volume of grey matter in Planum Polare (left)
25869	Volume of grey matter in Planum Polare (right)
25872	Volume of grey matter in Planum Temporale (left)
25873	Volume of grey matter in Planum Temporale (right)
25814	Volume of grey matter in Postcentral Gyrus (left)
25815	Volume of grey matter in Postcentral Gyrus (right)
25794	Volume of grey matter in Precentral Gyrus (left)
25795	Volume of grey matter in Precentral Gyrus (right)
25842	Volume of grey matter in Precuneous Cortex (left)
25843	Volume of grey matter in Precuneous Cortex (right)
25882	Volume of grey matter in Putamen (left)
25883	Volume of grey matter in Putamen (right)
25834	Volume of grey matter in Subcallosal Cortex (left)
25835	Volume of grey matter in Subcallosal Cortex (right)
25786	Volume of grey matter in Superior Frontal Gyrus (left)
25787	Volume of grey matter in Superior Frontal Gyrus (right)
25816	Volume of grey matter in Superior Parietal Lobule (left)
25817	Volume of grey matter in Superior Parietal Lobule (right)
25798	Volume of grey matter in Superior Temporal Gyrus, anterior division (left)
25799	Volume of grey matter in Superior Temporal Gyrus, anterior division (right)
25800	Volume of grey matter in Superior Temporal Gyrus, posterior division (left)
25801	Volume of grey matter in Superior Temporal Gyrus, posterior division (right)
25874	Volume of grey matter in Supracalcarine Cortex (left)
25875	Volume of grey matter in Supracalcarine Cortex (right)
25818	Volume of grey matter in Supramarginal Gyrus, anterior division (left)
25819	Volume of grey matter in Supramarginal Gyrus, anterior division (right)
25820	Volume of grey matter in Supramarginal Gyrus, posterior division (left)
25821	Volume of grey matter in Supramarginal Gyrus, posterior division (right)
25854	Volume of grey matter in Temporal Fusiform Cortex, anterior division (left)
25855	Volume of grey matter in Temporal Fusiform Cortex, anterior division (right)
25856	Volume of grey matter in Temporal Fusiform Cortex, posterior division (left)
25857	Volume of grey matter in Temporal Fusiform Cortex, posterior division (right)
25858	Volume of grey matter in Temporal Occipital Fusiform Cortex (left)
25859	Volume of grey matter in Temporal Occipital Fusiform Cortex (right)
25796	Volume of grey matter in Temporal Pole (left)
25797	Volume of grey matter in Temporal Pole (right)
25878	Volume of grey matter in Thalamus (left)
25879	Volume of grey matter in Thalamus (right)
25895	Volume of grey matter in V Cerebellum (left)
25896	Volume of grey matter in V Cerebellum (right)
25897	Volume of grey matter in VI Cerebellum (left)
25899	Volume of grey matter in VI Cerebellum (right)
25898	Volume of grey matter in VI Cerebellum (vermis)
25909	Volume of grey matter in VIIIa Cerebellum (left)
25911	Volume of grey matter in VIIIa Cerebellum (right)
25910	Volume of grey matter in VIIIa Cerebellum (vermis)
25912	Volume of grey matter in VIIIb Cerebellum (left)
25914	Volume of grey matter in VIIIb Cerebellum (right)
25913	Volume of grey matter in VIIIb Cerebellum (vermis)
25906	Volume of grey matter in VIIb Cerebellum (left)
25908	Volume of grey matter in VIIb Cerebellum (right)
25907	Volume of grey matter in VIIb Cerebellum (vermis)
25890	Volume of grey matter in Ventral Striatum (left)
25891	Volume of grey matter in Ventral Striatum (right)
25918	Volume of grey matter in X Cerebellum (left)
25919	Volume of grey matter in X Cerebellum (vermis)
25920	Volume of grey matter in X Cerebellum (right)
25023	Volume of accumbens (left)	2	sMRI: Subcortical volumes (FIRST) n=14
25024	Volume of accumbens (right)
25021	Volume of amygdala (left)
25022	Volume of amygdala (right)
25013	Volume of caudate (left)
25014	Volume of caudate (right)
25019	Volume of hippocampus (left)
25020	Volume of hippocampus (right)
25017	Volume of pallidum (left)
25018	Volume of pallidum (right)
25015	Volume of putamen (left)
25016	Volume of putamen (right)
25011	Volume of thalamus (left)
25012	Volume of thalamus (right)
26501	Mean intensity of 3rd-Ventricle (whole brain)	2	sMRI: Freesurfer subcortical volumetric segmentation: mean intensity n=43
26502	Mean intensity of 4th-Ventricle (whole brain)
26503	Mean intensity of 5th-Ventricle (whole brain)
26548	Mean intensity of Accumbens-area (left hemisphere)
26579	Mean intensity of Accumbens-area (right hemisphere)
26547	Mean intensity of Amygdala (left hemisphere)
26578	Mean intensity of Amygdala (right hemisphere)
26504	Mean intensity of Brain-Stem (whole brain)
26513	Mean intensity of CC-Anterior (whole brain)
26511	Mean intensity of CC-Central (whole brain)
26512	Mean intensity of CC-Mid-Anterior (whole brain)
26510	Mean intensity of CC-Mid-Posterior (whole brain)
26509	Mean intensity of CC-Posterior (whole brain)
26505	Mean intensity of CSF (whole brain)
26543	Mean intensity of Caudate (left hemisphere)
26574	Mean intensity of Caudate (right hemisphere)
26541	Mean intensity of Cerebellum-Cortex (left hemisphere)
26572	Mean intensity of Cerebellum-Cortex (right hemisphere)
26540	Mean intensity of Cerebellum-White-Matter (left hemisphere)
26571	Mean intensity of Cerebellum-White-Matter (right hemisphere)
26546	Mean intensity of Hippocampus (left hemisphere)
26577	Mean intensity of Hippocampus (right hemisphere)
26539	Mean intensity of Inf-Lat-Vent (left hemisphere)
26570	Mean intensity of Inf-Lat-Vent (right hemisphere)
26538	Mean intensity of Lateral-Ventricle (left hemisphere)
26569	Mean intensity of Lateral-Ventricle (right hemisphere)
26508	Mean intensity of Optic-Chiasm (whole brain)
26545	Mean intensity of Pallidum (left hemisphere)
26576	Mean intensity of Pallidum (right hemisphere)
26544	Mean intensity of Putamen (left hemisphere)
26575	Mean intensity of Putamen (right hemisphere)
26542	Mean intensity of Thalamus-Proper (left hemisphere)
26573	Mean intensity of Thalamus-Proper (right hemisphere)
26549	Mean intensity of VentralDC (left hemisphere)
26580	Mean intensity of VentralDC (right hemisphere)
26506	Mean intensity of WM-hypointensities (whole brain)
26551	Mean intensity of choroid-plexus (left hemisphere)
26582	Mean intensity of choroid-plexus (right hemisphere)
26507	Mean intensity of non-WM-hypointensities (whole brain)
26550	Mean intensity of vessel (left hemisphere)
26581	Mean intensity of vessel (right hemisphere)
26568	Number of HolesBeforeFixing (left hemisphere)
26599	Number of HolesBeforeFixing (right hemisphere)
26523	Volume of 3rd-Ventricle (whole brain)	2	sMRI: Freesurfer subcortical volumetric segmentation: volume n=56
26524	Volume of 4th-Ventricle (whole brain)
26525	Volume of 5th-Ventricle (whole brain)
26564	Volume of Accumbens-area (left hemisphere)
26595	Volume of Accumbens-area (right hemisphere)
26563	Volume of Amygdala (left hemisphere)
26594	Volume of Amygdala (right hemisphere)
26526	Volume of Brain-Stem (whole brain)
26514	Volume of BrainSeg (whole brain)
26515	Volume of BrainSegNotVent (whole brain)
26516	Volume of BrainSegNotVentSurf (whole brain)
26535	Volume of CC-Anterior (whole brain)
26533	Volume of CC-Central (whole brain)
26534	Volume of CC-Mid-Anterior (whole brain)
26532	Volume of CC-Mid-Posterior (whole brain)
26531	Volume of CC-Posterior (whole brain)
26527	Volume of CSF (whole brain)
26559	Volume of Caudate (left hemisphere)
26590	Volume of Caudate (right hemisphere)
26557	Volume of Cerebellum-Cortex (left hemisphere)
26588	Volume of Cerebellum-Cortex (right hemisphere)
26556	Volume of Cerebellum-White-Matter (left hemisphere)
26587	Volume of Cerebellum-White-Matter (right hemisphere)
26553	Volume of CerebralWhiteMatter (left hemisphere)
26584	Volume of CerebralWhiteMatter (right hemisphere)
26552	Volume of Cortex (left hemisphere)
26583	Volume of Cortex (right hemisphere)
26521	Volume of EstimatedTotalIntraCranial (whole brain)
26562	Volume of Hippocampus (left hemisphere)
26593	Volume of Hippocampus (right hemisphere)
26555	Volume of Inf-Lat-Vent (left hemisphere)
26586	Volume of Inf-Lat-Vent (right hemisphere)
26554	Volume of Lateral-Ventricle (left hemisphere)
26585	Volume of Lateral-Ventricle (right hemisphere)
26530	Volume of Optic-Chiasm (whole brain)
26561	Volume of Pallidum (left hemisphere)
26592	Volume of Pallidum (right hemisphere)
26560	Volume of Putamen (left hemisphere)
26591	Volume of Putamen (right hemisphere)
26517	Volume of SubCortGray (whole brain)
26519	Volume of SupraTentorial (whole brain)
26520	Volume of SupraTentorialNotVent (whole brain)
26558	Volume of Thalamus-Proper (left hemisphere)
26589	Volume of Thalamus-Proper (right hemisphere)
26518	Volume of TotalGray (whole brain)
26565	Volume of VentralDC (left hemisphere)
26596	Volume of VentralDC (right hemisphere)
26522	Volume of VentricleChoroid (whole brain)
26528	Volume of WM-hypointensities (whole brain)
26567	Volume of choroid-plexus (left hemisphere)
26598	Volume of choroid-plexus (right hemisphere)
26529	Volume of non-WM-hypointensities (whole brain)
26566	Volume of vessel (left hemisphere)
26597	Volume of vessel (right hemisphere)
26536	Volume-ratio of BrainSegVol-to-eTIV (whole brain)
26537	Volume-ratio of MaskVol-to-eTIV (whole brain)
27059	Area of BA1 (left hemisphere)	2	sMRI: Freesurfer BA exvivo: area n=28
27101	Area of BA1 (right hemisphere)
27060	Area of BA2 (left hemisphere)
27102	Area of BA2 (right hemisphere)
27061	Area of BA3a (left hemisphere)
27103	Area of BA3a (right hemisphere)
27062	Area of BA3b (left hemisphere)
27104	Area of BA3b (right hemisphere)
27066	Area of BA44 (left hemisphere)
27108	Area of BA44 (right hemisphere)
27067	Area of BA45 (left hemisphere)
27109	Area of BA45 (right hemisphere)
27063	Area of BA4a (left hemisphere)
27105	Area of BA4a (right hemisphere)
27064	Area of BA4p (left hemisphere)
27106	Area of BA4p (right hemisphere)
27065	Area of BA6 (left hemisphere)
27107	Area of BA6 (right hemisphere)
27070	Area of MT (left hemisphere)
27112	Area of MT (right hemisphere)
27068	Area of V1 (left hemisphere)
27110	Area of V1 (right hemisphere)
27069	Area of V2 (left hemisphere)
27111	Area of V2 (right hemisphere)
27072	Area of entorhinal (left hemisphere)
27114	Area of entorhinal (right hemisphere)
27071	Area of perirhinal (left hemisphere)
27113	Area of perirhinal (right hemisphere)
27073	Mean thickness of BA1 (left hemisphere)	2	sMRI: Freesurfer BA exvivo: mean thickness n=28
27115	Mean thickness of BA1 (right hemisphere)
27074	Mean thickness of BA2 (left hemisphere)
27116	Mean thickness of BA2 (right hemisphere)
27075	Mean thickness of BA3a (left hemisphere)
27117	Mean thickness of BA3a (right hemisphere)
27076	Mean thickness of BA3b (left hemisphere)
27118	Mean thickness of BA3b (right hemisphere)
27080	Mean thickness of BA44 (left hemisphere)
27122	Mean thickness of BA44 (right hemisphere)
27081	Mean thickness of BA45 (left hemisphere)
27123	Mean thickness of BA45 (right hemisphere)
27077	Mean thickness of BA4a (left hemisphere)
27119	Mean thickness of BA4a (right hemisphere)
27078	Mean thickness of BA4p (left hemisphere)
27120	Mean thickness of BA4p (right hemisphere)
27079	Mean thickness of BA6 (left hemisphere)
27121	Mean thickness of BA6 (right hemisphere)
27084	Mean thickness of MT (left hemisphere)
27126	Mean thickness of MT (right hemisphere)
27082	Mean thickness of V1 (left hemisphere)
27124	Mean thickness of V1 (right hemisphere)
27083	Mean thickness of V2 (left hemisphere)
27125	Mean thickness of V2 (right hemisphere)
27086	Mean thickness of entorhinal (left hemisphere)
27128	Mean thickness of entorhinal (right hemisphere)
27085	Mean thickness of perirhinal (left hemisphere)
27127	Mean thickness of perirhinal (right hemisphere)
27087	Volume of BA1 (left hemisphere)	2	sMRI: Freesurfer BA exvivo: volume n=28
27129	Volume of BA1 (right hemisphere)
27088	Volume of BA2 (left hemisphere)
27130	Volume of BA2 (right hemisphere)
27089	Volume of BA3a (left hemisphere)
27131	Volume of BA3a (right hemisphere)
27090	Volume of BA3b (left hemisphere)
27132	Volume of BA3b (right hemisphere)
27094	Volume of BA44 (left hemisphere)
27136	Volume of BA44 (right hemisphere)
27095	Volume of BA45 (left hemisphere)
27137	Volume of BA45 (right hemisphere)
27091	Volume of BA4a (left hemisphere)
27133	Volume of BA4a (right hemisphere)
27092	Volume of BA4p (left hemisphere)
27134	Volume of BA4p (right hemisphere)
27093	Volume of BA6 (left hemisphere)
27135	Volume of BA6 (right hemisphere)
27098	Volume of MT (left hemisphere)
27140	Volume of MT (right hemisphere)
27096	Volume of V1 (left hemisphere)
27138	Volume of V1 (right hemisphere)
27097	Volume of V2 (left hemisphere)
27139	Volume of V2 (right hemisphere)
27100	Volume of entorhinal (left hemisphere)
27142	Volume of entorhinal (right hemisphere)
27099	Volume of perirhinal (left hemisphere)
27141	Volume of perirhinal (right hemisphere)
27334	Area of G+S-cingul-Ant (left hemisphere)	2	sMRI: Freesurfer Destrieux (a2009s) white surface parcellation: area n=148
27556	Area of G+S-cingul-Ant (right hemisphere)
27335	Area of G+S-cingul-Mid-Ant (left hemisphere)
27557	Area of G+S-cingul-Mid-Ant (right hemisphere)
27336	Area of G+S-cingul-Mid-Post (left hemisphere)
27558	Area of G+S-cingul-Mid-Post (right hemisphere)
27329	Area of G+S-frontomargin (left hemisphere)
27551	Area of G+S-frontomargin (right hemisphere)
27330	Area of G+S-occipital-inf (left hemisphere)
27552	Area of G+S-occipital-inf (right hemisphere)
27331	Area of G+S-paracentral (left hemisphere)
27553	Area of G+S-paracentral (right hemisphere)
27332	Area of G+S-subcentral (left hemisphere)
27554	Area of G+S-subcentral (right hemisphere)
27333	Area of G+S-transv-frontopol (left hemisphere)
27555	Area of G+S-transv-frontopol (right hemisphere)
27345	Area of G-Ins-lg+S-cent-ins (left hemisphere)
27567	Area of G-Ins-lg+S-cent-ins (right hemisphere)
27337	Area of G-cingul-Post-dorsal (left hemisphere)
27559	Area of G-cingul-Post-dorsal (right hemisphere)
27338	Area of G-cingul-Post-ventral (left hemisphere)
27560	Area of G-cingul-Post-ventral (right hemisphere)
27339	Area of G-cuneus (left hemisphere)
27561	Area of G-cuneus (right hemisphere)
27340	Area of G-front-inf-Opercular (left hemisphere)
27562	Area of G-front-inf-Opercular (right hemisphere)
27341	Area of G-front-inf-Orbital (left hemisphere)
27563	Area of G-front-inf-Orbital (right hemisphere)
27342	Area of G-front-inf-Triangul (left hemisphere)
27564	Area of G-front-inf-Triangul (right hemisphere)
27343	Area of G-front-middle (left hemisphere)
27565	Area of G-front-middle (right hemisphere)
27344	Area of G-front-sup (left hemisphere)
27566	Area of G-front-sup (right hemisphere)
27346	Area of G-insular-short (left hemisphere)
27568	Area of G-insular-short (right hemisphere)
27349	Area of G-oc-temp-lat-fusifor (left hemisphere)
27571	Area of G-oc-temp-lat-fusifor (right hemisphere)
27350	Area of G-oc-temp-med-Lingual (left hemisphere)
27572	Area of G-oc-temp-med-Lingual (right hemisphere)
27351	Area of G-oc-temp-med-Parahip (left hemisphere)
27573	Area of G-oc-temp-med-Parahip (right hemisphere)
27347	Area of G-occipital-middle (left hemisphere)
27569	Area of G-occipital-middle (right hemisphere)
27348	Area of G-occipital-sup (left hemisphere)
27570	Area of G-occipital-sup (right hemisphere)
27352	Area of G-orbital (left hemisphere)
27574	Area of G-orbital (right hemisphere)
27353	Area of G-pariet-inf-Angular (left hemisphere)
27575	Area of G-pariet-inf-Angular (right hemisphere)
27354	Area of G-pariet-inf-Supramar (left hemisphere)
27576	Area of G-pariet-inf-Supramar (right hemisphere)
27355	Area of G-parietal-sup (left hemisphere)
27577	Area of G-parietal-sup (right hemisphere)
27356	Area of G-postcentral (left hemisphere)
27578	Area of G-postcentral (right hemisphere)
27357	Area of G-precentral (left hemisphere)
27579	Area of G-precentral (right hemisphere)
27358	Area of G-precuneus (left hemisphere)
27580	Area of G-precuneus (right hemisphere)
27359	Area of G-rectus (left hemisphere)
27581	Area of G-rectus (right hemisphere)
27360	Area of G-subcallosal (left hemisphere)
27582	Area of G-subcallosal (right hemisphere)
27361	Area of G-temp-sup-G-T-transv (left hemisphere)
27583	Area of G-temp-sup-G-T-transv (right hemisphere)
27362	Area of G-temp-sup-Lateral (left hemisphere)
27584	Area of G-temp-sup-Lateral (right hemisphere)
27363	Area of G-temp-sup-Plan-polar (left hemisphere)
27585	Area of G-temp-sup-Plan-polar (right hemisphere)
27364	Area of G-temp-sup-Plan-tempo (left hemisphere)
27586	Area of G-temp-sup-Plan-tempo (right hemisphere)
27365	Area of G-temporal-inf (left hemisphere)
27587	Area of G-temporal-inf (right hemisphere)
27366	Area of G-temporal-middle (left hemisphere)
27588	Area of G-temporal-middle (right hemisphere)
27367	Area of Lat-Fis-ant-Horizont (left hemisphere)
27589	Area of Lat-Fis-ant-Horizont (right hemisphere)
27368	Area of Lat-Fis-ant-Vertical (left hemisphere)
27590	Area of Lat-Fis-ant-Vertical (right hemisphere)
27369	Area of Lat-Fis-post (left hemisphere)
27591	Area of Lat-Fis-post (right hemisphere)
27370	Area of Pole-occipital (left hemisphere)
27592	Area of Pole-occipital (right hemisphere)
27371	Area of Pole-temporal (left hemisphere)
27593	Area of Pole-temporal (right hemisphere)
27372	Area of S-calcarine (left hemisphere)
27594	Area of S-calcarine (right hemisphere)
27373	Area of S-central (left hemisphere)
27595	Area of S-central (right hemisphere)
27374	Area of S-cingul-Marginalis (left hemisphere)
27596	Area of S-cingul-Marginalis (right hemisphere)
27375	Area of S-circular-insula-ant (left hemisphere)
27597	Area of S-circular-insula-ant (right hemisphere)
27376	Area of S-circular-insula-inf (left hemisphere)
27598	Area of S-circular-insula-inf (right hemisphere)
27377	Area of S-circular-insula-sup (left hemisphere)
27599	Area of S-circular-insula-sup (right hemisphere)
27378	Area of S-collat-transv-ant (left hemisphere)
27600	Area of S-collat-transv-ant (right hemisphere)
27379	Area of S-collat-transv-post (left hemisphere)
27601	Area of S-collat-transv-post (right hemisphere)
27380	Area of S-front-inf (left hemisphere)
27602	Area of S-front-inf (right hemisphere)
27381	Area of S-front-middle (left hemisphere)
27603	Area of S-front-middle (right hemisphere)
27382	Area of S-front-sup (left hemisphere)
27604	Area of S-front-sup (right hemisphere)
27383	Area of S-interm-prim-Jensen (left hemisphere)
27605	Area of S-interm-prim-Jensen (right hemisphere)
27384	Area of S-intrapariet+P-trans (left hemisphere)
27606	Area of S-intrapariet+P-trans (right hemisphere)
27385	Area of S-oc-middle+Lunatus (left hemisphere)
27607	Area of S-oc-middle+Lunatus (right hemisphere)
27386	Area of S-oc-sup+transversal (left hemisphere)
27608	Area of S-oc-sup+transversal (right hemisphere)
27388	Area of S-oc-temp-lat (left hemisphere)
27610	Area of S-oc-temp-lat (right hemisphere)
27389	Area of S-oc-temp-med+Lingual (left hemisphere)
27611	Area of S-oc-temp-med+Lingual (right hemisphere)
27387	Area of S-occipital-ant (left hemisphere)
27609	Area of S-occipital-ant (right hemisphere)
27392	Area of S-orbital-H-Shaped (left hemisphere)
27614	Area of S-orbital-H-Shaped (right hemisphere)
27390	Area of S-orbital-lateral (left hemisphere)
27612	Area of S-orbital-lateral (right hemisphere)
27391	Area of S-orbital-med-olfact (left hemisphere)
27613	Area of S-orbital-med-olfact (right hemisphere)
27393	Area of S-parieto-occipital (left hemisphere)
27615	Area of S-parieto-occipital (right hemisphere)
27394	Area of S-pericallosal (left hemisphere)
27616	Area of S-pericallosal (right hemisphere)
27395	Area of S-postcentral (left hemisphere)
27617	Area of S-postcentral (right hemisphere)
27396	Area of S-precentral-inf-part (left hemisphere)
27618	Area of S-precentral-inf-part (right hemisphere)
27397	Area of S-precentral-sup-part (left hemisphere)
27619	Area of S-precentral-sup-part (right hemisphere)
27398	Area of S-suborbital (left hemisphere)
27620	Area of S-suborbital (right hemisphere)
27399	Area of S-subparietal (left hemisphere)
27621	Area of S-subparietal (right hemisphere)
27400	Area of S-temporal-inf (left hemisphere)
27622	Area of S-temporal-inf (right hemisphere)
27401	Area of S-temporal-sup (left hemisphere)
27623	Area of S-temporal-sup (right hemisphere)
27402	Area of S-temporal-transverse (left hemisphere)
27624	Area of S-temporal-transverse (right hemisphere)
27408	Mean thickness of G+S-cingul-Ant (left hemisphere)	2	sMRI: Freesurfer Destrieux (a2009s) white surface parcellation: mean thickness n=148
27630	Mean thickness of G+S-cingul-Ant (right hemisphere)
27409	Mean thickness of G+S-cingul-Mid-Ant (left hemisphere)
27631	Mean thickness of G+S-cingul-Mid-Ant (right hemisphere)
27410	Mean thickness of G+S-cingul-Mid-Post (left hemisphere)
27632	Mean thickness of G+S-cingul-Mid-Post (right hemisphere)
27403	Mean thickness of G+S-frontomargin (left hemisphere)
27625	Mean thickness of G+S-frontomargin (right hemisphere)
27404	Mean thickness of G+S-occipital-inf (left hemisphere)
27626	Mean thickness of G+S-occipital-inf (right hemisphere)
27405	Mean thickness of G+S-paracentral (left hemisphere)
27627	Mean thickness of G+S-paracentral (right hemisphere)
27406	Mean thickness of G+S-subcentral (left hemisphere)
27628	Mean thickness of G+S-subcentral (right hemisphere)
27407	Mean thickness of G+S-transv-frontopol (left hemisphere)
27629	Mean thickness of G+S-transv-frontopol (right hemisphere)
27419	Mean thickness of G-Ins-lg+S-cent-ins (left hemisphere)
27641	Mean thickness of G-Ins-lg+S-cent-ins (right hemisphere)
27411	Mean thickness of G-cingul-Post-dorsal (left hemisphere)
27633	Mean thickness of G-cingul-Post-dorsal (right hemisphere)
27412	Mean thickness of G-cingul-Post-ventral (left hemisphere)
27634	Mean thickness of G-cingul-Post-ventral (right hemisphere)
27413	Mean thickness of G-cuneus (left hemisphere)
27635	Mean thickness of G-cuneus (right hemisphere)
27414	Mean thickness of G-front-inf-Opercular (left hemisphere)
27636	Mean thickness of G-front-inf-Opercular (right hemisphere)
27415	Mean thickness of G-front-inf-Orbital (left hemisphere)
27637	Mean thickness of G-front-inf-Orbital (right hemisphere)
27416	Mean thickness of G-front-inf-Triangul (left hemisphere)
27638	Mean thickness of G-front-inf-Triangul (right hemisphere)
27417	Mean thickness of G-front-middle (left hemisphere)
27639	Mean thickness of G-front-middle (right hemisphere)
27418	Mean thickness of G-front-sup (left hemisphere)
27640	Mean thickness of G-front-sup (right hemisphere)
27420	Mean thickness of G-insular-short (left hemisphere)
27642	Mean thickness of G-insular-short (right hemisphere)
27423	Mean thickness of G-oc-temp-lat-fusifor (left hemisphere)
27645	Mean thickness of G-oc-temp-lat-fusifor (right hemisphere)
27424	Mean thickness of G-oc-temp-med-Lingual (left hemisphere)
27646	Mean thickness of G-oc-temp-med-Lingual (right hemisphere)
27425	Mean thickness of G-oc-temp-med-Parahip (left hemisphere)
27647	Mean thickness of G-oc-temp-med-Parahip (right hemisphere)
27421	Mean thickness of G-occipital-middle (left hemisphere)
27643	Mean thickness of G-occipital-middle (right hemisphere)
27422	Mean thickness of G-occipital-sup (left hemisphere)
27644	Mean thickness of G-occipital-sup (right hemisphere)
27426	Mean thickness of G-orbital (left hemisphere)
27648	Mean thickness of G-orbital (right hemisphere)
27427	Mean thickness of G-pariet-inf-Angular (left hemisphere)
27649	Mean thickness of G-pariet-inf-Angular (right hemisphere)
27428	Mean thickness of G-pariet-inf-Supramar (left hemisphere)
27650	Mean thickness of G-pariet-inf-Supramar (right hemisphere)
27429	Mean thickness of G-parietal-sup (left hemisphere)
27651	Mean thickness of G-parietal-sup (right hemisphere)
27430	Mean thickness of G-postcentral (left hemisphere)
27652	Mean thickness of G-postcentral (right hemisphere)
27431	Mean thickness of G-precentral (left hemisphere)
27653	Mean thickness of G-precentral (right hemisphere)
27432	Mean thickness of G-precuneus (left hemisphere)
27654	Mean thickness of G-precuneus (right hemisphere)
27433	Mean thickness of G-rectus (left hemisphere)
27655	Mean thickness of G-rectus (right hemisphere)
27434	Mean thickness of G-subcallosal (left hemisphere)
27656	Mean thickness of G-subcallosal (right hemisphere)
27435	Mean thickness of G-temp-sup-G-T-transv (left hemisphere)
27657	Mean thickness of G-temp-sup-G-T-transv (right hemisphere)
27436	Mean thickness of G-temp-sup-Lateral (left hemisphere)
27658	Mean thickness of G-temp-sup-Lateral (right hemisphere)
27437	Mean thickness of G-temp-sup-Plan-polar (left hemisphere)
27659	Mean thickness of G-temp-sup-Plan-polar (right hemisphere)
27438	Mean thickness of G-temp-sup-Plan-tempo (left hemisphere)
27660	Mean thickness of G-temp-sup-Plan-tempo (right hemisphere)
27439	Mean thickness of G-temporal-inf (left hemisphere)
27661	Mean thickness of G-temporal-inf (right hemisphere)
27440	Mean thickness of G-temporal-middle (left hemisphere)
27662	Mean thickness of G-temporal-middle (right hemisphere)
27441	Mean thickness of Lat-Fis-ant-Horizont (left hemisphere)
27663	Mean thickness of Lat-Fis-ant-Horizont (right hemisphere)
27442	Mean thickness of Lat-Fis-ant-Vertical (left hemisphere)
27664	Mean thickness of Lat-Fis-ant-Vertical (right hemisphere)
27443	Mean thickness of Lat-Fis-post (left hemisphere)
27665	Mean thickness of Lat-Fis-post (right hemisphere)
27444	Mean thickness of Pole-occipital (left hemisphere)
27666	Mean thickness of Pole-occipital (right hemisphere)
27445	Mean thickness of Pole-temporal (left hemisphere)
27667	Mean thickness of Pole-temporal (right hemisphere)
27446	Mean thickness of S-calcarine (left hemisphere)
27668	Mean thickness of S-calcarine (right hemisphere)
27447	Mean thickness of S-central (left hemisphere)
27669	Mean thickness of S-central (right hemisphere)
27448	Mean thickness of S-cingul-Marginalis (left hemisphere)
27670	Mean thickness of S-cingul-Marginalis (right hemisphere)
27449	Mean thickness of S-circular-insula-ant (left hemisphere)
27671	Mean thickness of S-circular-insula-ant (right hemisphere)
27450	Mean thickness of S-circular-insula-inf (left hemisphere)
27672	Mean thickness of S-circular-insula-inf (right hemisphere)
27451	Mean thickness of S-circular-insula-sup (left hemisphere)
27673	Mean thickness of S-circular-insula-sup (right hemisphere)
27452	Mean thickness of S-collat-transv-ant (left hemisphere)
27674	Mean thickness of S-collat-transv-ant (right hemisphere)
27453	Mean thickness of S-collat-transv-post (left hemisphere)
27675	Mean thickness of S-collat-transv-post (right hemisphere)
27454	Mean thickness of S-front-inf (left hemisphere)
27676	Mean thickness of S-front-inf (right hemisphere)
27455	Mean thickness of S-front-middle (left hemisphere)
27677	Mean thickness of S-front-middle (right hemisphere)
27456	Mean thickness of S-front-sup (left hemisphere)
27678	Mean thickness of S-front-sup (right hemisphere)
27457	Mean thickness of S-interm-prim-Jensen (left hemisphere)
27679	Mean thickness of S-interm-prim-Jensen (right hemisphere)
27458	Mean thickness of S-intrapariet+P-trans (left hemisphere)
27680	Mean thickness of S-intrapariet+P-trans (right hemisphere)
27459	Mean thickness of S-oc-middle+Lunatus (left hemisphere)
27681	Mean thickness of S-oc-middle+Lunatus (right hemisphere)
27460	Mean thickness of S-oc-sup+transversal (left hemisphere)
27682	Mean thickness of S-oc-sup+transversal (right hemisphere)
27462	Mean thickness of S-oc-temp-lat (left hemisphere)
27684	Mean thickness of S-oc-temp-lat (right hemisphere)
27463	Mean thickness of S-oc-temp-med+Lingual (left hemisphere)
27685	Mean thickness of S-oc-temp-med+Lingual (right hemisphere)
27461	Mean thickness of S-occipital-ant (left hemisphere)
27683	Mean thickness of S-occipital-ant (right hemisphere)
27466	Mean thickness of S-orbital-H-Shaped (left hemisphere)
27688	Mean thickness of S-orbital-H-Shaped (right hemisphere)
27464	Mean thickness of S-orbital-lateral (left hemisphere)
27686	Mean thickness of S-orbital-lateral (right hemisphere)
27465	Mean thickness of S-orbital-med-olfact (left hemisphere)
27687	Mean thickness of S-orbital-med-olfact (right hemisphere)
27467	Mean thickness of S-parieto-occipital (left hemisphere)
27689	Mean thickness of S-parieto-occipital (right hemisphere)
27468	Mean thickness of S-pericallosal (left hemisphere)
27690	Mean thickness of S-pericallosal (right hemisphere)
27469	Mean thickness of S-postcentral (left hemisphere)
27691	Mean thickness of S-postcentral (right hemisphere)
27470	Mean thickness of S-precentral-inf-part (left hemisphere)
27692	Mean thickness of S-precentral-inf-part (right hemisphere)
27471	Mean thickness of S-precentral-sup-part (left hemisphere)
27693	Mean thickness of S-precentral-sup-part (right hemisphere)
27472	Mean thickness of S-suborbital (left hemisphere)
27694	Mean thickness of S-suborbital (right hemisphere)
27473	Mean thickness of S-subparietal (left hemisphere)
27695	Mean thickness of S-subparietal (right hemisphere)
27474	Mean thickness of S-temporal-inf (left hemisphere)
27696	Mean thickness of S-temporal-inf (right hemisphere)
27475	Mean thickness of S-temporal-sup (left hemisphere)
27697	Mean thickness of S-temporal-sup (right hemisphere)
27476	Mean thickness of S-temporal-transverse (left hemisphere)
27698	Mean thickness of S-temporal-transverse (right hemisphere)
27482	Volume of G+S-cingul-Ant (left hemisphere)	2	sMRI: Freesurfer Destrieux (a2009s) white surface parcellation: volume n=148
27704	Volume of G+S-cingul-Ant (right hemisphere)
27483	Volume of G+S-cingul-Mid-Ant (left hemisphere)
27705	Volume of G+S-cingul-Mid-Ant (right hemisphere)
27484	Volume of G+S-cingul-Mid-Post (left hemisphere)
27706	Volume of G+S-cingul-Mid-Post (right hemisphere)
27477	Volume of G+S-frontomargin (left hemisphere)
27699	Volume of G+S-frontomargin (right hemisphere)
27478	Volume of G+S-occipital-inf (left hemisphere)
27700	Volume of G+S-occipital-inf (right hemisphere)
27479	Volume of G+S-paracentral (left hemisphere)
27701	Volume of G+S-paracentral (right hemisphere)
27480	Volume of G+S-subcentral (left hemisphere)
27702	Volume of G+S-subcentral (right hemisphere)
27481	Volume of G+S-transv-frontopol (left hemisphere)
27703	Volume of G+S-transv-frontopol (right hemisphere)
27493	Volume of G-Ins-lg+S-cent-ins (left hemisphere)
27715	Volume of G-Ins-lg+S-cent-ins (right hemisphere)
27485	Volume of G-cingul-Post-dorsal (left hemisphere)
27707	Volume of G-cingul-Post-dorsal (right hemisphere)
27486	Volume of G-cingul-Post-ventral (left hemisphere)
27708	Volume of G-cingul-Post-ventral (right hemisphere)
27487	Volume of G-cuneus (left hemisphere)
27709	Volume of G-cuneus (right hemisphere)
27488	Volume of G-front-inf-Opercular (left hemisphere)
27710	Volume of G-front-inf-Opercular (right hemisphere)
27489	Volume of G-front-inf-Orbital (left hemisphere)
27711	Volume of G-front-inf-Orbital (right hemisphere)
27490	Volume of G-front-inf-Triangul (left hemisphere)
27712	Volume of G-front-inf-Triangul (right hemisphere)
27491	Volume of G-front-middle (left hemisphere)
27713	Volume of G-front-middle (right hemisphere)
27492	Volume of G-front-sup (left hemisphere)
27714	Volume of G-front-sup (right hemisphere)
27494	Volume of G-insular-short (left hemisphere)
27716	Volume of G-insular-short (right hemisphere)
27497	Volume of G-oc-temp-lat-fusifor (left hemisphere)
27719	Volume of G-oc-temp-lat-fusifor (right hemisphere)
27498	Volume of G-oc-temp-med-Lingual (left hemisphere)
27720	Volume of G-oc-temp-med-Lingual (right hemisphere)
27499	Volume of G-oc-temp-med-Parahip (left hemisphere)
27721	Volume of G-oc-temp-med-Parahip (right hemisphere)
27495	Volume of G-occipital-middle (left hemisphere)
27717	Volume of G-occipital-middle (right hemisphere)
27496	Volume of G-occipital-sup (left hemisphere)
27718	Volume of G-occipital-sup (right hemisphere)
27500	Volume of G-orbital (left hemisphere)
27722	Volume of G-orbital (right hemisphere)
27501	Volume of G-pariet-inf-Angular (left hemisphere)
27723	Volume of G-pariet-inf-Angular (right hemisphere)
27502	Volume of G-pariet-inf-Supramar (left hemisphere)
27724	Volume of G-pariet-inf-Supramar (right hemisphere)
27503	Volume of G-parietal-sup (left hemisphere)
27725	Volume of G-parietal-sup (right hemisphere)
27504	Volume of G-postcentral (left hemisphere)
27726	Volume of G-postcentral (right hemisphere)
27505	Volume of G-precentral (left hemisphere)
27727	Volume of G-precentral (right hemisphere)
27506	Volume of G-precuneus (left hemisphere)
27728	Volume of G-precuneus (right hemisphere)
27507	Volume of G-rectus (left hemisphere)
27729	Volume of G-rectus (right hemisphere)
27508	Volume of G-subcallosal (left hemisphere)
27730	Volume of G-subcallosal (right hemisphere)
27509	Volume of G-temp-sup-G-T-transv (left hemisphere)
27731	Volume of G-temp-sup-G-T-transv (right hemisphere)
27510	Volume of G-temp-sup-Lateral (left hemisphere)
27732	Volume of G-temp-sup-Lateral (right hemisphere)
27511	Volume of G-temp-sup-Plan-polar (left hemisphere)
27733	Volume of G-temp-sup-Plan-polar (right hemisphere)
27512	Volume of G-temp-sup-Plan-tempo (left hemisphere)
27734	Volume of G-temp-sup-Plan-tempo (right hemisphere)
27513	Volume of G-temporal-inf (left hemisphere)
27735	Volume of G-temporal-inf (right hemisphere)
27514	Volume of G-temporal-middle (left hemisphere)
27736	Volume of G-temporal-middle (right hemisphere)
27515	Volume of Lat-Fis-ant-Horizont (left hemisphere)
27737	Volume of Lat-Fis-ant-Horizont (right hemisphere)
27516	Volume of Lat-Fis-ant-Vertical (left hemisphere)
27738	Volume of Lat-Fis-ant-Vertical (right hemisphere)
27517	Volume of Lat-Fis-post (left hemisphere)
27739	Volume of Lat-Fis-post (right hemisphere)
27518	Volume of Pole-occipital (left hemisphere)
27740	Volume of Pole-occipital (right hemisphere)
27519	Volume of Pole-temporal (left hemisphere)
27741	Volume of Pole-temporal (right hemisphere)
27520	Volume of S-calcarine (left hemisphere)
27742	Volume of S-calcarine (right hemisphere)
27521	Volume of S-central (left hemisphere)
27743	Volume of S-central (right hemisphere)
27522	Volume of S-cingul-Marginalis (left hemisphere)
27744	Volume of S-cingul-Marginalis (right hemisphere)
27523	Volume of S-circular-insula-ant (left hemisphere)
27745	Volume of S-circular-insula-ant (right hemisphere)
27524	Volume of S-circular-insula-inf (left hemisphere)
27746	Volume of S-circular-insula-inf (right hemisphere)
27525	Volume of S-circular-insula-sup (left hemisphere)
27747	Volume of S-circular-insula-sup (right hemisphere)
27526	Volume of S-collat-transv-ant (left hemisphere)
27748	Volume of S-collat-transv-ant (right hemisphere)
27527	Volume of S-collat-transv-post (left hemisphere)
27749	Volume of S-collat-transv-post (right hemisphere)
27528	Volume of S-front-inf (left hemisphere)
27750	Volume of S-front-inf (right hemisphere)
27529	Volume of S-front-middle (left hemisphere)
27751	Volume of S-front-middle (right hemisphere)
27530	Volume of S-front-sup (left hemisphere)
27752	Volume of S-front-sup (right hemisphere)
27531	Volume of S-interm-prim-Jensen (left hemisphere)
27753	Volume of S-interm-prim-Jensen (right hemisphere)
27532	Volume of S-intrapariet+P-trans (left hemisphere)
27754	Volume of S-intrapariet+P-trans (right hemisphere)
27533	Volume of S-oc-middle+Lunatus (left hemisphere)
27755	Volume of S-oc-middle+Lunatus (right hemisphere)
27534	Volume of S-oc-sup+transversal (left hemisphere)
27756	Volume of S-oc-sup+transversal (right hemisphere)
27536	Volume of S-oc-temp-lat (left hemisphere)
27758	Volume of S-oc-temp-lat (right hemisphere)
27537	Volume of S-oc-temp-med+Lingual (left hemisphere)
27759	Volume of S-oc-temp-med+Lingual (right hemisphere)
27535	Volume of S-occipital-ant (left hemisphere)
27757	Volume of S-occipital-ant (right hemisphere)
27540	Volume of S-orbital-H-Shaped (left hemisphere)
27762	Volume of S-orbital-H-Shaped (right hemisphere)
27538	Volume of S-orbital-lateral (left hemisphere)
27760	Volume of S-orbital-lateral (right hemisphere)
27539	Volume of S-orbital-med-olfact (left hemisphere)
27761	Volume of S-orbital-med-olfact (right hemisphere)
27541	Volume of S-parieto-occipital (left hemisphere)
27763	Volume of S-parieto-occipital (right hemisphere)
27542	Volume of S-pericallosal (left hemisphere)
27764	Volume of S-pericallosal (right hemisphere)
27543	Volume of S-postcentral (left hemisphere)
27765	Volume of S-postcentral (right hemisphere)
27544	Volume of S-precentral-inf-part (left hemisphere)
27766	Volume of S-precentral-inf-part (right hemisphere)
27545	Volume of S-precentral-sup-part (left hemisphere)
27767	Volume of S-precentral-sup-part (right hemisphere)
27546	Volume of S-suborbital (left hemisphere)
27768	Volume of S-suborbital (right hemisphere)
27547	Volume of S-subparietal (left hemisphere)
27769	Volume of S-subparietal (right hemisphere)
27548	Volume of S-temporal-inf (left hemisphere)
27770	Volume of S-temporal-inf (right hemisphere)
27549	Volume of S-temporal-sup (left hemisphere)
27771	Volume of S-temporal-sup (right hemisphere)
27550	Volume of S-temporal-transverse (left hemisphere)
27772	Volume of S-temporal-transverse (right hemisphere)
27143	Area of caudalanteriorcingulate (left hemisphere)	2	sMRI: Freesurfer Desikan–Killiany–Tourville white surface parcellation: area n=62
27236	Area of caudalanteriorcingulate (right hemisphere)
27144	Area of caudalmiddlefrontal (left hemisphere)
27237	Area of caudalmiddlefrontal (right hemisphere)
27145	Area of cuneus (left hemisphere)
27238	Area of cuneus (right hemisphere)
27146	Area of entorhinal (left hemisphere)
27239	Area of entorhinal (right hemisphere)
27147	Area of fusiform (left hemisphere)
27240	Area of fusiform (right hemisphere)
27148	Area of inferiorparietal (left hemisphere)
27241	Area of inferiorparietal (right hemisphere)
27149	Area of inferiortemporal (left hemisphere)
27242	Area of inferiortemporal (right hemisphere)
27173	Area of insula (left hemisphere)
27266	Area of insula (right hemisphere)
27150	Area of isthmuscingulate (left hemisphere)
27243	Area of isthmuscingulate (right hemisphere)
27151	Area of lateraloccipital (left hemisphere)
27244	Area of lateraloccipital (right hemisphere)
27152	Area of lateralorbitofrontal (left hemisphere)
27245	Area of lateralorbitofrontal (right hemisphere)
27153	Area of lingual (left hemisphere)
27246	Area of lingual (right hemisphere)
27154	Area of medialorbitofrontal (left hemisphere)
27247	Area of medialorbitofrontal (right hemisphere)
27155	Area of middletemporal (left hemisphere)
27248	Area of middletemporal (right hemisphere)
27157	Area of paracentral (left hemisphere)
27250	Area of paracentral (right hemisphere)
27156	Area of parahippocampal (left hemisphere)
27249	Area of parahippocampal (right hemisphere)
27158	Area of parsopercularis (left hemisphere)
27251	Area of parsopercularis (right hemisphere)
27159	Area of parsorbitalis (left hemisphere)
27252	Area of parsorbitalis (right hemisphere)
27160	Area of parstriangularis (left hemisphere)
27253	Area of parstriangularis (right hemisphere)
27161	Area of pericalcarine (left hemisphere)
27254	Area of pericalcarine (right hemisphere)
27162	Area of postcentral (left hemisphere)
27255	Area of postcentral (right hemisphere)
27163	Area of posteriorcingulate (left hemisphere)
27256	Area of posteriorcingulate (right hemisphere)
27164	Area of precentral (left hemisphere)
27257	Area of precentral (right hemisphere)
27165	Area of precuneus (left hemisphere)
27258	Area of precuneus (right hemisphere)
27166	Area of rostralanteriorcingulate (left hemisphere)
27259	Area of rostralanteriorcingulate (right hemisphere)
27167	Area of rostralmiddlefrontal (left hemisphere)
27260	Area of rostralmiddlefrontal (right hemisphere)
27168	Area of superiorfrontal (left hemisphere)
27261	Area of superiorfrontal (right hemisphere)
27169	Area of superiorparietal (left hemisphere)
27262	Area of superiorparietal (right hemisphere)
27170	Area of superiortemporal (left hemisphere)
27263	Area of superiortemporal (right hemisphere)
27171	Area of supramarginal (left hemisphere)
27264	Area of supramarginal (right hemisphere)
27172	Area of transversetemporal (left hemisphere)
27265	Area of transversetemporal (right hemisphere)
27174	Mean thickness of caudalanteriorcingulate (left hemisphere)	2	sMRI: Freesurfer Desikan–Killiany–Tourville white surface parcellation: area n=62
27267	Mean thickness of caudalanteriorcingulate (right hemisphere)
27175	Mean thickness of caudalmiddlefrontal (left hemisphere)
27268	Mean thickness of caudalmiddlefrontal (right hemisphere)
27176	Mean thickness of cuneus (left hemisphere)
27269	Mean thickness of cuneus (right hemisphere)
27177	Mean thickness of entorhinal (left hemisphere)
27270	Mean thickness of entorhinal (right hemisphere)
27178	Mean thickness of fusiform (left hemisphere)
27271	Mean thickness of fusiform (right hemisphere)
27179	Mean thickness of inferiorparietal (left hemisphere)
27272	Mean thickness of inferiorparietal (right hemisphere)
27180	Mean thickness of inferiortemporal (left hemisphere)
27273	Mean thickness of inferiortemporal (right hemisphere)
27204	Mean thickness of insula (left hemisphere)
27297	Mean thickness of insula (right hemisphere)
27181	Mean thickness of isthmuscingulate (left hemisphere)
27274	Mean thickness of isthmuscingulate (right hemisphere)
27182	Mean thickness of lateraloccipital (left hemisphere)
27275	Mean thickness of lateraloccipital (right hemisphere)
27183	Mean thickness of lateralorbitofrontal (left hemisphere)
27276	Mean thickness of lateralorbitofrontal (right hemisphere)
27184	Mean thickness of lingual (left hemisphere)
27277	Mean thickness of lingual (right hemisphere)
27185	Mean thickness of medialorbitofrontal (left hemisphere)
27278	Mean thickness of medialorbitofrontal (right hemisphere)
27186	Mean thickness of middletemporal (left hemisphere)
27279	Mean thickness of middletemporal (right hemisphere)
27188	Mean thickness of paracentral (left hemisphere)
27281	Mean thickness of paracentral (right hemisphere)
27187	Mean thickness of parahippocampal (left hemisphere)
27280	Mean thickness of parahippocampal (right hemisphere)
27189	Mean thickness of parsopercularis (left hemisphere)
27282	Mean thickness of parsopercularis (right hemisphere)
27190	Mean thickness of parsorbitalis (left hemisphere)
27283	Mean thickness of parsorbitalis (right hemisphere)
27191	Mean thickness of parstriangularis (left hemisphere)
27284	Mean thickness of parstriangularis (right hemisphere)
27192	Mean thickness of pericalcarine (left hemisphere)
27285	Mean thickness of pericalcarine (right hemisphere)
27193	Mean thickness of postcentral (left hemisphere)
27286	Mean thickness of postcentral (right hemisphere)
27194	Mean thickness of posteriorcingulate (left hemisphere)
27287	Mean thickness of posteriorcingulate (right hemisphere)
27195	Mean thickness of precentral (left hemisphere)
27288	Mean thickness of precentral (right hemisphere)
27196	Mean thickness of precuneus (left hemisphere)
27289	Mean thickness of precuneus (right hemisphere)
27197	Mean thickness of rostralanteriorcingulate (left hemisphere)
27290	Mean thickness of rostralanteriorcingulate (right hemisphere)
27198	Mean thickness of rostralmiddlefrontal (left hemisphere)
27291	Mean thickness of rostralmiddlefrontal (right hemisphere)
27199	Mean thickness of superiorfrontal (left hemisphere)
27292	Mean thickness of superiorfrontal (right hemisphere)
27200	Mean thickness of superiorparietal (left hemisphere)
27293	Mean thickness of superiorparietal (right hemisphere)
27201	Mean thickness of superiortemporal (left hemisphere)
27294	Mean thickness of superiortemporal (right hemisphere)
27202	Mean thickness of supramarginal (left hemisphere)
27295	Mean thickness of supramarginal (right hemisphere)
27203	Mean thickness of transversetemporal (left hemisphere)
27296	Mean thickness of transversetemporal (right hemisphere)
27205	Volume of caudalanteriorcingulate (left hemisphere)	2	sMRI: Freesurfer Desikan–Killiany–Tourville white surface parcellation: volume n=62
27298	Volume of caudalanteriorcingulate (right hemisphere)
27206	Volume of caudalmiddlefrontal (left hemisphere)
27299	Volume of caudalmiddlefrontal (right hemisphere)
27207	Volume of cuneus (left hemisphere)
27300	Volume of cuneus (right hemisphere)
27208	Volume of entorhinal (left hemisphere)
27301	Volume of entorhinal (right hemisphere)
27209	Volume of fusiform (left hemisphere)
27302	Volume of fusiform (right hemisphere)
27210	Volume of inferiorparietal (left hemisphere)
27303	Volume of inferiorparietal (right hemisphere)
27211	Volume of inferiortemporal (left hemisphere)
27304	Volume of inferiortemporal (right hemisphere)
27235	Volume of insula (left hemisphere)
27328	Volume of insula (right hemisphere)
27212	Volume of isthmuscingulate (left hemisphere)
27305	Volume of isthmuscingulate (right hemisphere)
27213	Volume of lateraloccipital (left hemisphere)
27306	Volume of lateraloccipital (right hemisphere)
27214	Volume of lateralorbitofrontal (left hemisphere)
27307	Volume of lateralorbitofrontal (right hemisphere)
27215	Volume of lingual (left hemisphere)
27308	Volume of lingual (right hemisphere)
27216	Volume of medialorbitofrontal (left hemisphere)
27309	Volume of medialorbitofrontal (right hemisphere)
27217	Volume of middletemporal (left hemisphere)
27310	Volume of middletemporal (right hemisphere)
27219	Volume of paracentral (left hemisphere)
27312	Volume of paracentral (right hemisphere)
27218	Volume of parahippocampal (left hemisphere)
27311	Volume of parahippocampal (right hemisphere)
27220	Volume of parsopercularis (left hemisphere)
27313	Volume of parsopercularis (right hemisphere)
27221	Volume of parsorbitalis (left hemisphere)
27314	Volume of parsorbitalis (right hemisphere)
27222	Volume of parstriangularis (left hemisphere)
27315	Volume of parstriangularis (right hemisphere)
27223	Volume of pericalcarine (left hemisphere)
27316	Volume of pericalcarine (right hemisphere)
27224	Volume of postcentral (left hemisphere)
27317	Volume of postcentral (right hemisphere)
27225	Volume of posteriorcingulate (left hemisphere)
27318	Volume of posteriorcingulate (right hemisphere)
27226	Volume of precentral (left hemisphere)
27319	Volume of precentral (right hemisphere)
27227	Volume of precuneus (left hemisphere)
27320	Volume of precuneus (right hemisphere)
27228	Volume of rostralanteriorcingulate (left hemisphere)
27321	Volume of rostralanteriorcingulate (right hemisphere)
27229	Volume of rostralmiddlefrontal (left hemisphere)
27322	Volume of rostralmiddlefrontal (right hemisphere)
27230	Volume of superiorfrontal (left hemisphere)
27323	Volume of superiorfrontal (right hemisphere)
27231	Volume of superiorparietal (left hemisphere)
27324	Volume of superiorparietal (right hemisphere)
27232	Volume of superiortemporal (left hemisphere)
27325	Volume of superiortemporal (right hemisphere)
27233	Volume of supramarginal (left hemisphere)
27326	Volume of supramarginal (right hemisphere)
27234	Volume of transversetemporal (left hemisphere)
27327	Volume of transversetemporal (right hemisphere)
26990	Grey-white contrast in bankssts (left hemisphere)	2	sMRI: Freesurfer Desikan–Killiany parcellation: Mean gray-white matter intensity n=70
27025	Grey-white contrast in bankssts (right hemisphere)
26991	Grey-white contrast in caudalanteriorcingulate (left hemisphere)
27026	Grey-white contrast in caudalanteriorcingulate (right hemisphere)
26992	Grey-white contrast in caudalmiddlefrontal (left hemisphere)
27027	Grey-white contrast in caudalmiddlefrontal (right hemisphere)
26993	Grey-white contrast in cuneus (left hemisphere)
27028	Grey-white contrast in cuneus (right hemisphere)
26994	Grey-white contrast in entorhinal (left hemisphere)
27029	Grey-white contrast in entorhinal (right hemisphere)
27020	Grey-white contrast in frontalpole (left hemisphere)
27055	Grey-white contrast in frontalpole (right hemisphere)
26995	Grey-white contrast in fusiform (left hemisphere)
27030	Grey-white contrast in fusiform (right hemisphere)
26996	Grey-white contrast in inferiorparietal (left hemisphere)
27031	Grey-white contrast in inferiorparietal (right hemisphere)
26997	Grey-white contrast in inferiortemporal (left hemisphere)
27032	Grey-white contrast in inferiortemporal (right hemisphere)
27023	Grey-white contrast in insula (left hemisphere)
27058	Grey-white contrast in insula (right hemisphere)
26998	Grey-white contrast in isthmuscingulate (left hemisphere)
27033	Grey-white contrast in isthmuscingulate (right hemisphere)
26999	Grey-white contrast in lateraloccipital (left hemisphere)
27034	Grey-white contrast in lateraloccipital (right hemisphere)
27000	Grey-white contrast in lateralorbitofrontal (left hemisphere)
27035	Grey-white contrast in lateralorbitofrontal (right hemisphere)
27001	Grey-white contrast in lingual (left hemisphere)
27036	Grey-white contrast in lingual (right hemisphere)
27002	Grey-white contrast in medialorbitofrontal (left hemisphere)
27037	Grey-white contrast in medialorbitofrontal (right hemisphere)
27003	Grey-white contrast in middletemporal (left hemisphere)
27038	Grey-white contrast in middletemporal (right hemisphere)
27005	Grey-white contrast in paracentral (left hemisphere)
27040	Grey-white contrast in paracentral (right hemisphere)
27004	Grey-white contrast in parahippocampal (left hemisphere)
27039	Grey-white contrast in parahippocampal (right hemisphere)
27006	Grey-white contrast in parsopercularis (left hemisphere)
27041	Grey-white contrast in parsopercularis (right hemisphere)
27007	Grey-white contrast in parsorbitalis (left hemisphere)
27042	Grey-white contrast in parsorbitalis (right hemisphere)
27008	Grey-white contrast in parstriangularis (left hemisphere)
27043	Grey-white contrast in parstriangularis (right hemisphere)
27009	Grey-white contrast in pericalcarine (left hemisphere)
27044	Grey-white contrast in pericalcarine (right hemisphere)
27010	Grey-white contrast in postcentral (left hemisphere)
27045	Grey-white contrast in postcentral (right hemisphere)
27011	Grey-white contrast in posteriorcingulate (left hemisphere)
27046	Grey-white contrast in posteriorcingulate (right hemisphere)
27012	Grey-white contrast in precentral (left hemisphere)
27047	Grey-white contrast in precentral (right hemisphere)
27013	Grey-white contrast in precuneus (left hemisphere)
27048	Grey-white contrast in precuneus (right hemisphere)
27014	Grey-white contrast in rostralanteriorcingulate (left hemisphere)
27049	Grey-white contrast in rostralanteriorcingulate (right hemisphere)
27015	Grey-white contrast in rostralmiddlefrontal (left hemisphere)
27050	Grey-white contrast in rostralmiddlefrontal (right hemisphere)
27016	Grey-white contrast in superiorfrontal (left hemisphere)
27051	Grey-white contrast in superiorfrontal (right hemisphere)
27017	Grey-white contrast in superiorparietal (left hemisphere)
27052	Grey-white contrast in superiorparietal (right hemisphere)
27018	Grey-white contrast in superiortemporal (left hemisphere)
27053	Grey-white contrast in superiortemporal (right hemisphere)
27019	Grey-white contrast in supramarginal (left hemisphere)
27054	Grey-white contrast in supramarginal (right hemisphere)
27021	Grey-white contrast in temporalpole (left hemisphere)
27056	Grey-white contrast in temporalpole (right hemisphere)
27022	Grey-white contrast in transversetemporal (left hemisphere)
27057	Grey-white contrast in transversetemporal (right hemisphere)
26989	Grey-white contrast in unknown (left hemisphere)
27024	Grey-white contrast in unknown (right hemisphere)
26923	Area of TotalSurface (left hemisphere)	2	sMRI: Freesurfer Desikan–Killiany pial surface parcellation n=66
26956	Area of TotalSurface (right hemisphere)
26924	Area of bankssts (left hemisphere)
26957	Area of bankssts (right hemisphere)
26925	Area of caudalanteriorcingulate (left hemisphere)
26958	Area of caudalanteriorcingulate (right hemisphere)
26926	Area of caudalmiddlefrontal (left hemisphere)
26959	Area of caudalmiddlefrontal (right hemisphere)
26927	Area of cuneus (left hemisphere)
26960	Area of cuneus (right hemisphere)
26928	Area of entorhinal (left hemisphere)
26961	Area of entorhinal (right hemisphere)
26954	Area of frontalpole (left hemisphere)
26987	Area of frontalpole (right hemisphere)
26929	Area of fusiform (left hemisphere)
26962	Area of fusiform (right hemisphere)
26930	Area of inferiorparietal (left hemisphere)
26963	Area of inferiorparietal (right hemisphere)
26931	Area of inferiortemporal (left hemisphere)
26964	Area of inferiortemporal (right hemisphere)
26932	Area of isthmuscingulate (left hemisphere)
26965	Area of isthmuscingulate (right hemisphere)
26933	Area of lateraloccipital (left hemisphere)
26966	Area of lateraloccipital (right hemisphere)
26934	Area of lateralorbitofrontal (left hemisphere)
26967	Area of lateralorbitofrontal (right hemisphere)
26935	Area of lingual (left hemisphere)
26968	Area of lingual (right hemisphere)
26936	Area of medialorbitofrontal (left hemisphere)
26969	Area of medialorbitofrontal (right hemisphere)
26937	Area of middletemporal (left hemisphere)
26970	Area of middletemporal (right hemisphere)
26939	Area of paracentral (left hemisphere)
26972	Area of paracentral (right hemisphere)
26938	Area of parahippocampal (left hemisphere)
26971	Area of parahippocampal (right hemisphere)
26940	Area of parsopercularis (left hemisphere)
26973	Area of parsopercularis (right hemisphere)
26941	Area of parsorbitalis (left hemisphere)
26974	Area of parsorbitalis (right hemisphere)
26942	Area of parstriangularis (left hemisphere)
26975	Area of parstriangularis (right hemisphere)
26943	Area of pericalcarine (left hemisphere)
26976	Area of pericalcarine (right hemisphere)
26944	Area of postcentral (left hemisphere)
26977	Area of postcentral (right hemisphere)
26945	Area of posteriorcingulate (left hemisphere)
26978	Area of posteriorcingulate (right hemisphere)
26946	Area of precentral (left hemisphere)
26979	Area of precentral (right hemisphere)
26947	Area of precuneus (left hemisphere)
26980	Area of precuneus (right hemisphere)
26948	Area of rostralanteriorcingulate (left hemisphere)
26981	Area of rostralanteriorcingulate (right hemisphere)
26949	Area of rostralmiddlefrontal (left hemisphere)
26982	Area of rostralmiddlefrontal (right hemisphere)
26950	Area of superiorfrontal (left hemisphere)
26983	Area of superiorfrontal (right hemisphere)
26951	Area of superiorparietal (left hemisphere)
26984	Area of superiorparietal (right hemisphere)
26952	Area of superiortemporal (left hemisphere)
26985	Area of superiortemporal (right hemisphere)
26953	Area of supramarginal (left hemisphere)
26986	Area of supramarginal (right hemisphere)
26955	Area of transversetemporal (left hemisphere)
26988	Area of transversetemporal (right hemisphere)
26721	Area of TotalSurface (left hemisphere)	2	sMRI: Freesurfer Desikan–Killiany white surface parcellation: area n=68
26822	Area of TotalSurface (right hemisphere)
26722	Area of bankssts (left hemisphere)
26823	Area of bankssts (right hemisphere)
26723	Area of caudalanteriorcingulate (left hemisphere)
26824	Area of caudalanteriorcingulate (right hemisphere)
26724	Area of caudalmiddlefrontal (left hemisphere)
26825	Area of caudalmiddlefrontal (right hemisphere)
26725	Area of cuneus (left hemisphere)
26826	Area of cuneus (right hemisphere)
26726	Area of entorhinal (left hemisphere)
26827	Area of entorhinal (right hemisphere)
26752	Area of frontalpole (left hemisphere)
26853	Area of frontalpole (right hemisphere)
26727	Area of fusiform (left hemisphere)
26828	Area of fusiform (right hemisphere)
26728	Area of inferiorparietal (left hemisphere)
26829	Area of inferiorparietal (right hemisphere)
26729	Area of inferiortemporal (left hemisphere)
26830	Area of inferiortemporal (right hemisphere)
26754	Area of insula (left hemisphere)
26855	Area of insula (right hemisphere)
26730	Area of isthmuscingulate (left hemisphere)
26831	Area of isthmuscingulate (right hemisphere)
26731	Area of lateraloccipital (left hemisphere)
26832	Area of lateraloccipital (right hemisphere)
26732	Area of lateralorbitofrontal (left hemisphere)
26833	Area of lateralorbitofrontal (right hemisphere)
26733	Area of lingual (left hemisphere)
26834	Area of lingual (right hemisphere)
26734	Area of medialorbitofrontal (left hemisphere)
26835	Area of medialorbitofrontal (right hemisphere)
26735	Area of middletemporal (left hemisphere)
26836	Area of middletemporal (right hemisphere)
26737	Area of paracentral (left hemisphere)
26838	Area of paracentral (right hemisphere)
26736	Area of parahippocampal (left hemisphere)
26837	Area of parahippocampal (right hemisphere)
26738	Area of parsopercularis (left hemisphere)
26839	Area of parsopercularis (right hemisphere)
26739	Area of parsorbitalis (left hemisphere)
26840	Area of parsorbitalis (right hemisphere)
26740	Area of parstriangularis (left hemisphere)
26841	Area of parstriangularis (right hemisphere)
26741	Area of pericalcarine (left hemisphere)
26842	Area of pericalcarine (right hemisphere)
26742	Area of postcentral (left hemisphere)
26843	Area of postcentral (right hemisphere)
26743	Area of posteriorcingulate (left hemisphere)
26844	Area of posteriorcingulate (right hemisphere)
26744	Area of precentral (left hemisphere)
26845	Area of precentral (right hemisphere)
26745	Area of precuneus (left hemisphere)
26846	Area of precuneus (right hemisphere)
26746	Area of rostralanteriorcingulate (left hemisphere)
26847	Area of rostralanteriorcingulate (right hemisphere)
26747	Area of rostralmiddlefrontal (left hemisphere)
26848	Area of rostralmiddlefrontal (right hemisphere)
26748	Area of superiorfrontal (left hemisphere)
26849	Area of superiorfrontal (right hemisphere)
26749	Area of superiorparietal (left hemisphere)
26850	Area of superiorparietal (right hemisphere)
26750	Area of superiortemporal (left hemisphere)
26851	Area of superiortemporal (right hemisphere)
26751	Area of supramarginal (left hemisphere)
26852	Area of supramarginal (right hemisphere)
26753	Area of transversetemporal (left hemisphere)
26854	Area of transversetemporal (right hemisphere)
26755	Mean thickness of GlobalMeanmean thickness (left hemisphere)	2	sMRI: Freesurfer Desikan–Killiany white surface parcellation: mean thickness
26856	Mean thickness of GlobalMeanmean thickness (right hemisphere)
26756	Mean thickness of bankssts (left hemisphere)
26857	Mean thickness of bankssts (right hemisphere)
26757	Mean thickness of caudalanteriorcingulate (left hemisphere)
26858	Mean thickness of caudalanteriorcingulate (right hemisphere)
26758	Mean thickness of caudalmiddlefrontal (left hemisphere)
26859	Mean thickness of caudalmiddlefrontal (right hemisphere)
26759	Mean thickness of cuneus (left hemisphere)
26860	Mean thickness of cuneus (right hemisphere)
26760	Mean thickness of entorhinal (left hemisphere)
26861	Mean thickness of entorhinal (right hemisphere)
26786	Mean thickness of frontalpole (left hemisphere)
26887	Mean thickness of frontalpole (right hemisphere)
26761	Mean thickness of fusiform (left hemisphere)
26862	Mean thickness of fusiform (right hemisphere)
26762	Mean thickness of inferiorparietal (left hemisphere)
26863	Mean thickness of inferiorparietal (right hemisphere)
26763	Mean thickness of inferiortemporal (left hemisphere)
26864	Mean thickness of inferiortemporal (right hemisphere)
26788	Mean thickness of insula (left hemisphere)
26889	Mean thickness of insula (right hemisphere)
26764	Mean thickness of isthmuscingulate (left hemisphere)
26865	Mean thickness of isthmuscingulate (right hemisphere)
26765	Mean thickness of lateraloccipital (left hemisphere)
26866	Mean thickness of lateraloccipital (right hemisphere)
26766	Mean thickness of lateralorbitofrontal (left hemisphere)
26867	Mean thickness of lateralorbitofrontal (right hemisphere)
26767	Mean thickness of lingual (left hemisphere)
26868	Mean thickness of lingual (right hemisphere)
26768	Mean thickness of medialorbitofrontal (left hemisphere)
26869	Mean thickness of medialorbitofrontal (right hemisphere)
26769	Mean thickness of middletemporal (left hemisphere)
26870	Mean thickness of middletemporal (right hemisphere)
26771	Mean thickness of paracentral (left hemisphere)
26872	Mean thickness of paracentral (right hemisphere)
26770	Mean thickness of parahippocampal (left hemisphere)
26871	Mean thickness of parahippocampal (right hemisphere)
26772	Mean thickness of parsopercularis (left hemisphere)
26873	Mean thickness of parsopercularis (right hemisphere)
26773	Mean thickness of parsorbitalis (left hemisphere)
26874	Mean thickness of parsorbitalis (right hemisphere)
26774	Mean thickness of parstriangularis (left hemisphere)
26875	Mean thickness of parstriangularis (right hemisphere)
26775	Mean thickness of pericalcarine (left hemisphere)
26876	Mean thickness of pericalcarine (right hemisphere)
26776	Mean thickness of postcentral (left hemisphere)
26877	Mean thickness of postcentral (right hemisphere)
26777	Mean thickness of posteriorcingulate (left hemisphere)
26878	Mean thickness of posteriorcingulate (right hemisphere)
26778	Mean thickness of precentral (left hemisphere)
26879	Mean thickness of precentral (right hemisphere)
26779	Mean thickness of precuneus (left hemisphere)
26880	Mean thickness of precuneus (right hemisphere)
26780	Mean thickness of rostralanteriorcingulate (left hemisphere)
26881	Mean thickness of rostralanteriorcingulate (right hemisphere)
26781	Mean thickness of rostralmiddlefrontal (left hemisphere)
26882	Mean thickness of rostralmiddlefrontal (right hemisphere)
26782	Mean thickness of superiorfrontal (left hemisphere)
26883	Mean thickness of superiorfrontal (right hemisphere)
26783	Mean thickness of superiorparietal (left hemisphere)
26884	Mean thickness of superiorparietal (right hemisphere)
26784	Mean thickness of superiortemporal (left hemisphere)
26885	Mean thickness of superiortemporal (right hemisphere)
26785	Mean thickness of supramarginal (left hemisphere)
26886	Mean thickness of supramarginal (right hemisphere)
26787	Mean thickness of transversetemporal (left hemisphere)
26888	Mean thickness of transversetemporal (right hemisphere)
26789	Volume of bankssts (left hemisphere)	2	sMRI: Freesurfer Desikan–Killiany white surface parcellation: volume
26890	Volume of bankssts (right hemisphere)
26790	Volume of caudalanteriorcingulate (left hemisphere)
26891	Volume of caudalanteriorcingulate (right hemisphere)
26791	Volume of caudalmiddlefrontal (left hemisphere)
26892	Volume of caudalmiddlefrontal (right hemisphere)
26792	Volume of cuneus (left hemisphere)
26893	Volume of cuneus (right hemisphere)
26793	Volume of entorhinal (left hemisphere)
26894	Volume of entorhinal (right hemisphere)
26819	Volume of frontalpole (left hemisphere)
26920	Volume of frontalpole (right hemisphere)
26794	Volume of fusiform (left hemisphere)
26895	Volume of fusiform (right hemisphere)
26795	Volume of inferiorparietal (left hemisphere)
26896	Volume of inferiorparietal (right hemisphere)
26796	Volume of inferiortemporal (left hemisphere)
26897	Volume of inferiortemporal (right hemisphere)
26821	Volume of insula (left hemisphere)
26922	Volume of insula (right hemisphere)
26797	Volume of isthmuscingulate (left hemisphere)
26898	Volume of isthmuscingulate (right hemisphere)
26798	Volume of lateraloccipital (left hemisphere)
26899	Volume of lateraloccipital (right hemisphere)
26799	Volume of lateralorbitofrontal (left hemisphere)
26900	Volume of lateralorbitofrontal (right hemisphere)
26800	Volume of lingual (left hemisphere)
26901	Volume of lingual (right hemisphere)
26801	Volume of medialorbitofrontal (left hemisphere)
26902	Volume of medialorbitofrontal (right hemisphere)
26802	Volume of middletemporal (left hemisphere)
26903	Volume of middletemporal (right hemisphere)
26804	Volume of paracentral (left hemisphere)
26905	Volume of paracentral (right hemisphere)
26803	Volume of parahippocampal (left hemisphere)
26904	Volume of parahippocampal (right hemisphere)
26805	Volume of parsopercularis (left hemisphere)
26906	Volume of parsopercularis (right hemisphere)
26806	Volume of parsorbitalis (left hemisphere)
26907	Volume of parsorbitalis (right hemisphere)
26807	Volume of parstriangularis (left hemisphere)
26908	Volume of parstriangularis (right hemisphere)
26808	Volume of pericalcarine (left hemisphere)
26909	Volume of pericalcarine (right hemisphere)
26809	Volume of postcentral (left hemisphere)
26910	Volume of postcentral (right hemisphere)
26810	Volume of posteriorcingulate (left hemisphere)
26911	Volume of posteriorcingulate (right hemisphere)
26811	Volume of precentral (left hemisphere)
26912	Volume of precentral (right hemisphere)
26812	Volume of precuneus (left hemisphere)
26913	Volume of precuneus (right hemisphere)
26813	Volume of rostralanteriorcingulate (left hemisphere)
26914	Volume of rostralanteriorcingulate (right hemisphere)
26814	Volume of rostralmiddlefrontal (left hemisphere)
26915	Volume of rostralmiddlefrontal (right hemisphere)
26815	Volume of superiorfrontal (left hemisphere)
26916	Volume of superiorfrontal (right hemisphere)
26816	Volume of superiorparietal (left hemisphere)
26917	Volume of superiorparietal (right hemisphere)
26817	Volume of superiortemporal (left hemisphere)
26918	Volume of superiortemporal (right hemisphere)
26818	Volume of supramarginal (left hemisphere)
26919	Volume of supramarginal (right hemisphere)
26820	Volume of transversetemporal (left hemisphere)
26921	Volume of transversetemporal (right hemisphere)
26684	Volume of AV (left hemisphere)	2	sMRI: Freesurfer subcortical volumetric subsegmentation
26710	Volume of AV (right hemisphere)
26602	Volume of Accessory-Basal-nucleus (left hemisphere)
26612	Volume of Accessory-Basal-nucleus (right hemisphere)
26603	Volume of Anterior-amygdaloid-area-AAA (left hemisphere)
26613	Volume of Anterior-amygdaloid-area-AAA (right hemisphere)
26601	Volume of Basal-nucleus (left hemisphere)
26611	Volume of Basal-nucleus (right hemisphere)
26622	Volume of CA1-body (left hemisphere)
26644	Volume of CA1-body (right hemisphere)
26626	Volume of CA1-head (left hemisphere)
26648	Volume of CA1-head (right hemisphere)
26632	Volume of CA3-body (left hemisphere)
26654	Volume of CA3-body (right hemisphere)
26637	Volume of CA3-head (left hemisphere)
26659	Volume of CA3-head (right hemisphere)
26635	Volume of CA4-body (left hemisphere)
26657	Volume of CA4-body (right hemisphere)
26634	Volume of CA4-head (left hemisphere)
26656	Volume of CA4-head (right hemisphere)
26681	Volume of CL (left hemisphere)
26706	Volume of CL (right hemisphere)
26670	Volume of CM (left hemisphere)
26694	Volume of CM (right hemisphere)
26677	Volume of CeM (left hemisphere)
26703	Volume of CeM (right hemisphere)
26604	Volume of Central-nucleus (left hemisphere)
26614	Volume of Central-nucleus (right hemisphere)
26606	Volume of Cortical-nucleus (left hemisphere)
26616	Volume of Cortical-nucleus (right hemisphere)
26607	Volume of Corticoamygdaloid-transitio (left hemisphere)
26617	Volume of Corticoamygdaloid-transitio (right hemisphere)
26633	Volume of GC-ML-DG-body (left hemisphere)
26655	Volume of GC-ML-DG-body (right hemisphere)
26631	Volume of GC-ML-DG-head (left hemisphere)
26653	Volume of GC-ML-DG-head (right hemisphere)
26638	Volume of HATA (left hemisphere)
26660	Volume of HATA (right hemisphere)
26620	Volume of Hippocampal-tail (left hemisphere)
26642	Volume of Hippocampal-tail (right hemisphere)
26668	Volume of L-Sg (left hemisphere)
26692	Volume of L-Sg (right hemisphere)
26712	Volume of LD (left hemisphere)
26713	Volume of LD (right hemisphere)
26665	Volume of LGN (left hemisphere)
26688	Volume of LGN (right hemisphere)
26687	Volume of LP (left hemisphere)
26711	Volume of LP (right hemisphere)
26600	Volume of Lateral-nucleus (left hemisphere)
26610	Volume of Lateral-nucleus (right hemisphere)
26676	Volume of MDl (left hemisphere)
26700	Volume of MDl (right hemisphere)
26673	Volume of MDm (left hemisphere)
26697	Volume of MDm (right hemisphere)
26664	Volume of MGN (left hemisphere)
26689	Volume of MGN (right hemisphere)
26679	Volume of MV(Re) (left hemisphere)
26702	Volume of MV(Re) (right hemisphere)
26605	Volume of Medial-nucleus (left hemisphere)
26615	Volume of Medial-nucleus (right hemisphere)
26716	Volume of Medulla (whole brain)
26719	Volume of Midbrain (whole brain)
26608	Volume of Paralaminar-nucleus (left hemisphere)
26618	Volume of Paralaminar-nucleus (right hemisphere)
26685	Volume of Pc (left hemisphere)
26708	Volume of Pc (right hemisphere)
26674	Volume of Pf (left hemisphere)
26698	Volume of Pf (right hemisphere)
26717	Volume of Pons (whole brain)
26683	Volume of Pt (left hemisphere)
26709	Volume of Pt (right hemisphere)
26672	Volume of PuA (left hemisphere)
26696	Volume of PuA (right hemisphere)
26666	Volume of PuI (left hemisphere)
26690	Volume of PuI (right hemisphere)
26682	Volume of PuL (left hemisphere)
26705	Volume of PuL (right hemisphere)
26667	Volume of PuM (left hemisphere)
26691	Volume of PuM (right hemisphere)
26718	Volume of SCP (whole brain)
26678	Volume of VA (left hemisphere)
26701	Volume of VA (right hemisphere)
26675	Volume of VAmc (left hemisphere)
26699	Volume of VAmc (right hemisphere)
26671	Volume of VLa (left hemisphere)
26695	Volume of VLa (right hemisphere)
26686	Volume of VLp (left hemisphere)
26707	Volume of VLp (right hemisphere)
26680	Volume of VM (left hemisphere)
26704	Volume of VM (right hemisphere)
26669	Volume of VPL (left hemisphere)
26693	Volume of VPL (right hemisphere)
26609	Volume of Whole-amygdala (left hemisphere)
26619	Volume of Whole-amygdala (right hemisphere)
26720	Volume of Whole-brainstem (whole brain)
26639	Volume of Whole-hippocampal-body (left hemisphere)
26661	Volume of Whole-hippocampal-body (right hemisphere)
26640	Volume of Whole-hippocampal-head (left hemisphere)
26662	Volume of Whole-hippocampal-head (right hemisphere)
26641	Volume of Whole-hippocampus (left hemisphere)
26663	Volume of Whole-hippocampus (right hemisphere)
26714	Volume of Whole-thalamus (left hemisphere)
26715	Volume of Whole-thalamus (right hemisphere)
26636	Volume of fimbria (left hemisphere)
26658	Volume of fimbria (right hemisphere)
26624	Volume of hippocampal-fissure (left hemisphere)
26646	Volume of hippocampal-fissure (right hemisphere)
26630	Volume of molecular-layer-HP-body (left hemisphere)
26652	Volume of molecular-layer-HP-body (right hemisphere)
26629	Volume of molecular-layer-HP-head (left hemisphere)
26651	Volume of molecular-layer-HP-head (right hemisphere)
26628	Volume of parasubiculum (left hemisphere)
26650	Volume of parasubiculum (right hemisphere)
26627	Volume of presubiculum-body (left hemisphere)
26649	Volume of presubiculum-body (right hemisphere)
26625	Volume of presubiculum-head (left hemisphere)
26647	Volume of presubiculum-head (right hemisphere)
26621	Volume of subiculum-body (left hemisphere)
26643	Volume of subiculum-body (right hemisphere)
26623	Volume of subiculum-head (left hemisphere)
26645	Volume of subiculum-head (right hemisphere)
25010	Volume of brain, grey+white matter	2	sMRI: whole-brain measures from T1-weighted MRI
25009	Volume of brain, grey+white matter (normalised for head size)
25008	Volume of white matter
25007	Volume of white matter (normalised for head size)
25006	Volume of grey matter
25005	Volume of grey matter (normalised for head size)
25002	Volume of peripheral cortical grey matter
25001	Volume of peripheral cortical grey matter (normalised for head size)
25004	Volume of ventricular cerebrospinal fluid
25003	Volume of ventricular cerebrospinal fluid (normalised for head size)
25025	Volume of brain stem + 4th ventricle
26536	Volume-ratio of BrainSegVol-to-eTIV (whole brain)
26537	Volume-ratio of MaskVol-to-eTIV (whole brain)
24486	Total volume of deep white matter hyperintensities	2	sMRI: whole-brain measures from T2-weighted MRI
24485	Total volume of peri-ventricular white matter hyperintensities
25781	Total volume of white matter hyperintensities (from T1 and T2 FLAIR images)
			Total sMRI phenotypes: 20
25079	Mean FA in anterior corona radiata on FA skeleton (left)	2	dwMRI: fractional anisotropy (FA) TBSS
25078	Mean FA in anterior corona radiata on FA skeleton (right)
25073	Mean FA in anterior limb of internal capsule on FA skeleton (left)
25072	Mean FA in anterior limb of internal capsule on FA skeleton (right)
25059	Mean FA in body of corpus callosum on FA skeleton
25071	Mean FA in cerebral peduncle on FA skeleton (left)
25070	Mean FA in cerebral peduncle on FA skeleton (right)
25091	Mean FA in cingulum cingulate gyrus on FA skeleton (left)
25090	Mean FA in cingulum cingulate gyrus on FA skeleton (right)
25093	Mean FA in cingulum hippocampus on FA skeleton (left)
25092	Mean FA in cingulum hippocampus on FA skeleton (right)
25063	Mean FA in corticospinal tract on FA skeleton (left)
25062	Mean FA in corticospinal tract on FA skeleton (right)
25089	Mean FA in external capsule on FA skeleton (left)
25088	Mean FA in external capsule on FA skeleton (right)
25095	Mean FA in fornix cres+stria terminalis on FA skeleton (left)
25094	Mean FA in fornix cres+stria terminalis on FA skeleton (right)
25061	Mean FA in fornix on FA skeleton
25058	Mean FA in genu of corpus callosum on FA skeleton
25067	Mean FA in inferior cerebellar peduncle on FA skeleton (left)
25066	Mean FA in inferior cerebellar peduncle on FA skeleton (right)
25065	Mean FA in medial lemniscus on FA skeleton (left)
25064	Mean FA in medial lemniscus on FA skeleton (right)
25056	Mean FA in middle cerebellar peduncle on FA skeleton
25057	Mean FA in pontine crossing tract on FA skeleton
25083	Mean FA in posterior corona radiata on FA skeleton (left)
25082	Mean FA in posterior corona radiata on FA skeleton (right)
25075	Mean FA in posterior limb of internal capsule on FA skeleton (left)
25074	Mean FA in posterior limb of internal capsule on FA skeleton (right)
25085	Mean FA in posterior thalamic radiation on FA skeleton (left)
25084	Mean FA in posterior thalamic radiation on FA skeleton (right)
25077	Mean FA in retrolenticular part of internal capsule on FA skeleton (left)
25076	Mean FA in retrolenticular part of internal capsule on FA skeleton (right)
25087	Mean FA in sagittal stratum on FA skeleton (left)
25086	Mean FA in sagittal stratum on FA skeleton (right)
25060	Mean FA in splenium of corpus callosum on FA skeleton
25069	Mean FA in superior cerebellar peduncle on FA skeleton (left)
25068	Mean FA in superior cerebellar peduncle on FA skeleton (right)
25081	Mean FA in superior corona radiata on FA skeleton (left)
25080	Mean FA in superior corona radiata on FA skeleton (right)
25099	Mean FA in superior fronto-occipital fasciculus on FA skeleton (left)
25098	Mean FA in superior fronto-occipital fasciculus on FA skeleton (right)
25097	Mean FA in superior longitudinal fasciculus on FA skeleton (left)
25096	Mean FA in superior longitudinal fasciculus on FA skeleton (right)
25103	Mean FA in tapetum on FA skeleton (left)
25102	Mean FA in tapetum on FA skeleton (right)
25101	Mean FA in uncinate fasciculus on FA skeleton (left)
25100	Mean FA in uncinate fasciculus on FA skeleton (right)
25367	Mean ICVF in anterior corona radiata on FA skeleton (left)	2	dwMRI: intra-cellular volume fraction (ICVF) TBSS
25366	Mean ICVF in anterior corona radiata on FA skeleton (right)
25361	Mean ICVF in anterior limb of internal capsule on FA skeleton (left)
25360	Mean ICVF in anterior limb of internal capsule on FA skeleton (right)
25347	Mean ICVF in body of corpus callosum on FA skeleton
25359	Mean ICVF in cerebral peduncle on FA skeleton (left)
25358	Mean ICVF in cerebral peduncle on FA skeleton (right)
25379	Mean ICVF in cingulum cingulate gyrus on FA skeleton (left)
25378	Mean ICVF in cingulum cingulate gyrus on FA skeleton (right)
25381	Mean ICVF in cingulum hippocampus on FA skeleton (left)
25380	Mean ICVF in cingulum hippocampus on FA skeleton (right)
25351	Mean ICVF in corticospinal tract on FA skeleton (left)
25350	Mean ICVF in corticospinal tract on FA skeleton (right)
25377	Mean ICVF in external capsule on FA skeleton (left)
25376	Mean ICVF in external capsule on FA skeleton (right)
25383	Mean ICVF in fornix cres+stria terminalis on FA skeleton (left)
25382	Mean ICVF in fornix cres+stria terminalis on FA skeleton (right)
25349	Mean ICVF in fornix on FA skeleton
25346	Mean ICVF in genu of corpus callosum on FA skeleton
25355	Mean ICVF in inferior cerebellar peduncle on FA skeleton (left)
25354	Mean ICVF in inferior cerebellar peduncle on FA skeleton (right)
25353	Mean ICVF in medial lemniscus on FA skeleton (left)
25352	Mean ICVF in medial lemniscus on FA skeleton (right)
25344	Mean ICVF in middle cerebellar peduncle on FA skeleton
25345	Mean ICVF in pontine crossing tract on FA skeleton
25371	Mean ICVF in posterior corona radiata on FA skeleton (left)
25370	Mean ICVF in posterior corona radiata on FA skeleton (right)
25363	Mean ICVF in posterior limb of internal capsule on FA skeleton (left)
25362	Mean ICVF in posterior limb of internal capsule on FA skeleton (right)
25373	Mean ICVF in posterior thalamic radiation on FA skeleton (left)
25372	Mean ICVF in posterior thalamic radiation on FA skeleton (right)
25365	Mean ICVF in retrolenticular part of internal capsule on FA skeleton (left)
25364	Mean ICVF in retrolenticular part of internal capsule on FA skeleton (right)
25375	Mean ICVF in sagittal stratum on FA skeleton (left)
25374	Mean ICVF in sagittal stratum on FA skeleton (right)
25348	Mean ICVF in splenium of corpus callosum on FA skeleton
25357	Mean ICVF in superior cerebellar peduncle on FA skeleton (left)
25356	Mean ICVF in superior cerebellar peduncle on FA skeleton (right)
25369	Mean ICVF in superior corona radiata on FA skeleton (left)
25368	Mean ICVF in superior corona radiata on FA skeleton (right)
25387	Mean ICVF in superior fronto-occipital fasciculus on FA skeleton (left)
25386	Mean ICVF in superior fronto-occipital fasciculus on FA skeleton (right)
25385	Mean ICVF in superior longitudinal fasciculus on FA skeleton (left)
25384	Mean ICVF in superior longitudinal fasciculus on FA skeleton (right)
25391	Mean ICVF in tapetum on FA skeleton (left)
25390	Mean ICVF in tapetum on FA skeleton (right)
25389	Mean ICVF in uncinate fasciculus on FA skeleton (left)
25388	Mean ICVF in uncinate fasciculus on FA skeleton (right)
25463	Mean ISOVF in anterior corona radiata on FA skeleton (left)	2	dwMRI: intra-cellular volume fraction (ICVF) TBSS
25462	Mean ISOVF in anterior corona radiata on FA skeleton (right)
25457	Mean ISOVF in anterior limb of internal capsule on FA skeleton (left)
25456	Mean ISOVF in anterior limb of internal capsule on FA skeleton (right)
25443	Mean ISOVF in body of corpus callosum on FA skeleton
25455	Mean ISOVF in cerebral peduncle on FA skeleton (left)
25454	Mean ISOVF in cerebral peduncle on FA skeleton (right)
25475	Mean ISOVF in cingulum cingulate gyrus on FA skeleton (left)
25474	Mean ISOVF in cingulum cingulate gyrus on FA skeleton (right)
25477	Mean ISOVF in cingulum hippocampus on FA skeleton (left)
25476	Mean ISOVF in cingulum hippocampus on FA skeleton (right)
25447	Mean ISOVF in corticospinal tract on FA skeleton (left)
25446	Mean ISOVF in corticospinal tract on FA skeleton (right)
25473	Mean ISOVF in external capsule on FA skeleton (left)
25472	Mean ISOVF in external capsule on FA skeleton (right)
25479	Mean ISOVF in fornix cres+stria terminalis on FA skeleton (left)
25478	Mean ISOVF in fornix cres+stria terminalis on FA skeleton (right)
25445	Mean ISOVF in fornix on FA skeleton
25442	Mean ISOVF in genu of corpus callosum on FA skeleton
25451	Mean ISOVF in inferior cerebellar peduncle on FA skeleton (left)
25450	Mean ISOVF in inferior cerebellar peduncle on FA skeleton (right)
25449	Mean ISOVF in medial lemniscus on FA skeleton (left)
25448	Mean ISOVF in medial lemniscus on FA skeleton (right)
25440	Mean ISOVF in middle cerebellar peduncle on FA skeleton
25441	Mean ISOVF in pontine crossing tract on FA skeleton
25467	Mean ISOVF in posterior corona radiata on FA skeleton (left)
25466	Mean ISOVF in posterior corona radiata on FA skeleton (right)
25459	Mean ISOVF in posterior limb of internal capsule on FA skeleton (left)
25458	Mean ISOVF in posterior limb of internal capsule on FA skeleton (right)
25469	Mean ISOVF in posterior thalamic radiation on FA skeleton (left)
25468	Mean ISOVF in posterior thalamic radiation on FA skeleton (right)
25461	Mean ISOVF in retrolenticular part of internal capsule on FA skeleton (left)
25460	Mean ISOVF in retrolenticular part of internal capsule on FA skeleton (right)
25471	Mean ISOVF in sagittal stratum on FA skeleton (left)
25470	Mean ISOVF in sagittal stratum on FA skeleton (right)
25444	Mean ISOVF in splenium of corpus callosum on FA skeleton
25453	Mean ISOVF in superior cerebellar peduncle on FA skeleton (left)
25452	Mean ISOVF in superior cerebellar peduncle on FA skeleton (right)
25465	Mean ISOVF in superior corona radiata on FA skeleton (left)
25464	Mean ISOVF in superior corona radiata on FA skeleton (right)
25483	Mean ISOVF in superior fronto-occipital fasciculus on FA skeleton (left)
25482	Mean ISOVF in superior fronto-occipital fasciculus on FA skeleton (right)
25481	Mean ISOVF in superior longitudinal fasciculus on FA skeleton (left)
25480	Mean ISOVF in superior longitudinal fasciculus on FA skeleton (right)
25487	Mean ISOVF in tapetum on FA skeleton (left)
25486	Mean ISOVF in tapetum on FA skeleton (right)
25485	Mean ISOVF in uncinate fasciculus on FA skeleton (left)
25484	Mean ISOVF in uncinate fasciculus on FA skeleton (right)
25223	Mean L1 in anterior corona radiata on FA skeleton (left)	2	dwMRI: L1 TBSS
25222	Mean L1 in anterior corona radiata on FA skeleton (right)
25217	Mean L1 in anterior limb of internal capsule on FA skeleton (left)
25216	Mean L1 in anterior limb of internal capsule on FA skeleton (right)
25203	Mean L1 in body of corpus callosum on FA skeleton
25215	Mean L1 in cerebral peduncle on FA skeleton (left)
25214	Mean L1 in cerebral peduncle on FA skeleton (right)
25235	Mean L1 in cingulum cingulate gyrus on FA skeleton (left)
25234	Mean L1 in cingulum cingulate gyrus on FA skeleton (right)
25237	Mean L1 in cingulum hippocampus on FA skeleton (left)
25236	Mean L1 in cingulum hippocampus on FA skeleton (right)
25207	Mean L1 in corticospinal tract on FA skeleton (left)
25206	Mean L1 in corticospinal tract on FA skeleton (right)
25233	Mean L1 in external capsule on FA skeleton (left)
25232	Mean L1 in external capsule on FA skeleton (right)
25239	Mean L1 in fornix cres+stria terminalis on FA skeleton (left)
25238	Mean L1 in fornix cres+stria terminalis on FA skeleton (right)
25205	Mean L1 in fornix on FA skeleton
25202	Mean L1 in genu of corpus callosum on FA skeleton
25211	Mean L1 in inferior cerebellar peduncle on FA skeleton (left)
25210	Mean L1 in inferior cerebellar peduncle on FA skeleton (right)
25209	Mean L1 in medial lemniscus on FA skeleton (left)
25208	Mean L1 in medial lemniscus on FA skeleton (right)
25200	Mean L1 in middle cerebellar peduncle on FA skeleton
25201	Mean L1 in pontine crossing tract on FA skeleton
25227	Mean L1 in posterior corona radiata on FA skeleton (left)
25226	Mean L1 in posterior corona radiata on FA skeleton (right)
25219	Mean L1 in posterior limb of internal capsule on FA skeleton (left)
25218	Mean L1 in posterior limb of internal capsule on FA skeleton (right)
25229	Mean L1 in posterior thalamic radiation on FA skeleton (left)
25228	Mean L1 in posterior thalamic radiation on FA skeleton (right)
25221	Mean L1 in retrolenticular part of internal capsule on FA skeleton (left)
25220	Mean L1 in retrolenticular part of internal capsule on FA skeleton (right)
25231	Mean L1 in sagittal stratum on FA skeleton (left)
25230	Mean L1 in sagittal stratum on FA skeleton (right)
25204	Mean L1 in splenium of corpus callosum on FA skeleton
25213	Mean L1 in superior cerebellar peduncle on FA skeleton (left)
25212	Mean L1 in superior cerebellar peduncle on FA skeleton (right)
25225	Mean L1 in superior corona radiata on FA skeleton (left)
25224	Mean L1 in superior corona radiata on FA skeleton (right)
25243	Mean L1 in superior fronto-occipital fasciculus on FA skeleton (left)
25242	Mean L1 in superior fronto-occipital fasciculus on FA skeleton (right)
25241	Mean L1 in superior longitudinal fasciculus on FA skeleton (left)
25240	Mean L1 in superior longitudinal fasciculus on FA skeleton (right)
25247	Mean L1 in tapetum on FA skeleton (left)
25246	Mean L1 in tapetum on FA skeleton (right)
25245	Mean L1 in uncinate fasciculus on FA skeleton (left)
25244	Mean L1 in uncinate fasciculus on FA skeleton (right)
25271	Mean L2 in anterior corona radiata on FA skeleton (left)	2	dwMRI: L2 TBSS
25270	Mean L2 in anterior corona radiata on FA skeleton (right)
25265	Mean L2 in anterior limb of internal capsule on FA skeleton (left)
25264	Mean L2 in anterior limb of internal capsule on FA skeleton (right)
25251	Mean L2 in body of corpus callosum on FA skeleton
25263	Mean L2 in cerebral peduncle on FA skeleton (left)
25262	Mean L2 in cerebral peduncle on FA skeleton (right)
25283	Mean L2 in cingulum cingulate gyrus on FA skeleton (left)
25282	Mean L2 in cingulum cingulate gyrus on FA skeleton (right)
25285	Mean L2 in cingulum hippocampus on FA skeleton (left)
25284	Mean L2 in cingulum hippocampus on FA skeleton (right)
25255	Mean L2 in corticospinal tract on FA skeleton (left)
25254	Mean L2 in corticospinal tract on FA skeleton (right)
25281	Mean L2 in external capsule on FA skeleton (left)
25280	Mean L2 in external capsule on FA skeleton (right)
25287	Mean L2 in fornix cres+stria terminalis on FA skeleton (left)
25286	Mean L2 in fornix cres+stria terminalis on FA skeleton (right)
25253	Mean L2 in fornix on FA skeleton
25250	Mean L2 in genu of corpus callosum on FA skeleton
25259	Mean L2 in inferior cerebellar peduncle on FA skeleton (left)
25258	Mean L2 in inferior cerebellar peduncle on FA skeleton (right)
25257	Mean L2 in medial lemniscus on FA skeleton (left)
25256	Mean L2 in medial lemniscus on FA skeleton (right)
25248	Mean L2 in middle cerebellar peduncle on FA skeleton
25249	Mean L2 in pontine crossing tract on FA skeleton
25275	Mean L2 in posterior corona radiata on FA skeleton (left)
25274	Mean L2 in posterior corona radiata on FA skeleton (right)
25267	Mean L2 in posterior limb of internal capsule on FA skeleton (left)
25266	Mean L2 in posterior limb of internal capsule on FA skeleton (right)
25277	Mean L2 in posterior thalamic radiation on FA skeleton (left)
25276	Mean L2 in posterior thalamic radiation on FA skeleton (right)
25269	Mean L2 in retrolenticular part of internal capsule on FA skeleton (left)
25268	Mean L2 in retrolenticular part of internal capsule on FA skeleton (right)
25279	Mean L2 in sagittal stratum on FA skeleton (left)
25278	Mean L2 in sagittal stratum on FA skeleton (right)
25252	Mean L2 in splenium of corpus callosum on FA skeleton
25261	Mean L2 in superior cerebellar peduncle on FA skeleton (left)
25260	Mean L2 in superior cerebellar peduncle on FA skeleton (right)
25273	Mean L2 in superior corona radiata on FA skeleton (left)
25272	Mean L2 in superior corona radiata on FA skeleton (right)
25291	Mean L2 in superior fronto-occipital fasciculus on FA skeleton (left)
25290	Mean L2 in superior fronto-occipital fasciculus on FA skeleton (right)
25289	Mean L2 in superior longitudinal fasciculus on FA skeleton (left)
25288	Mean L2 in superior longitudinal fasciculus on FA skeleton (right)
25295	Mean L2 in tapetum on FA skeleton (left)
25294	Mean L2 in tapetum on FA skeleton (right)
25293	Mean L2 in uncinate fasciculus on FA skeleton (left)
25292	Mean L2 in uncinate fasciculus on FA skeleton (right)
25319	Mean L3 in anterior corona radiata on FA skeleton (left)	2	dwMRI: L3 TBSS
25318	Mean L3 in anterior corona radiata on FA skeleton (right)
25313	Mean L3 in anterior limb of internal capsule on FA skeleton (left)
25312	Mean L3 in anterior limb of internal capsule on FA skeleton (right)
25299	Mean L3 in body of corpus callosum on FA skeleton
25311	Mean L3 in cerebral peduncle on FA skeleton (left)
25310	Mean L3 in cerebral peduncle on FA skeleton (right)
25331	Mean L3 in cingulum cingulate gyrus on FA skeleton (left)
25330	Mean L3 in cingulum cingulate gyrus on FA skeleton (right)
25333	Mean L3 in cingulum hippocampus on FA skeleton (left)
25332	Mean L3 in cingulum hippocampus on FA skeleton (right)
25303	Mean L3 in corticospinal tract on FA skeleton (left)
25302	Mean L3 in corticospinal tract on FA skeleton (right)
25329	Mean L3 in external capsule on FA skeleton (left)
25328	Mean L3 in external capsule on FA skeleton (right)
25335	Mean L3 in fornix cres+stria terminalis on FA skeleton (left)
25334	Mean L3 in fornix cres+stria terminalis on FA skeleton (right)
25301	Mean L3 in fornix on FA skeleton
25298	Mean L3 in genu of corpus callosum on FA skeleton
25307	Mean L3 in inferior cerebellar peduncle on FA skeleton (left)
25306	Mean L3 in inferior cerebellar peduncle on FA skeleton (right)
25305	Mean L3 in medial lemniscus on FA skeleton (left)
25304	Mean L3 in medial lemniscus on FA skeleton (right)
25296	Mean L3 in middle cerebellar peduncle on FA skeleton
25297	Mean L3 in pontine crossing tract on FA skeleton
25323	Mean L3 in posterior corona radiata on FA skeleton (left)
25322	Mean L3 in posterior corona radiata on FA skeleton (right)
25315	Mean L3 in posterior limb of internal capsule on FA skeleton (left)
25314	Mean L3 in posterior limb of internal capsule on FA skeleton (right)
25325	Mean L3 in posterior thalamic radiation on FA skeleton (left)
25324	Mean L3 in posterior thalamic radiation on FA skeleton (right)
25317	Mean L3 in retrolenticular part of internal capsule on FA skeleton (left)
25316	Mean L3 in retrolenticular part of internal capsule on FA skeleton (right)
25327	Mean L3 in sagittal stratum on FA skeleton (left)
25326	Mean L3 in sagittal stratum on FA skeleton (right)
25300	Mean L3 in splenium of corpus callosum on FA skeleton
25309	Mean L3 in superior cerebellar peduncle on FA skeleton (left)
25308	Mean L3 in superior cerebellar peduncle on FA skeleton (right)
25321	Mean L3 in superior corona radiata on FA skeleton (left)
25320	Mean L3 in superior corona radiata on FA skeleton (right)
25339	Mean L3 in superior fronto-occipital fasciculus on FA skeleton (left)
25338	Mean L3 in superior fronto-occipital fasciculus on FA skeleton (right)
25337	Mean L3 in superior longitudinal fasciculus on FA skeleton (left)
25336	Mean L3 in superior longitudinal fasciculus on FA skeleton (right)
25343	Mean L3 in tapetum on FA skeleton (left)
25342	Mean L3 in tapetum on FA skeleton (right)
25341	Mean L3 in uncinate fasciculus on FA skeleton (left)
25340	Mean L3 in uncinate fasciculus on FA skeleton (right)
25127	Mean MD in anterior corona radiata on FA skeleton (left)	2	dwMRI: mean diffusivity (MD) TBSS
25126	Mean MD in anterior corona radiata on FA skeleton (right)
25121	Mean MD in anterior limb of internal capsule on FA skeleton (left)
25120	Mean MD in anterior limb of internal capsule on FA skeleton (right)
25107	Mean MD in body of corpus callosum on FA skeleton
25119	Mean MD in cerebral peduncle on FA skeleton (left)
25118	Mean MD in cerebral peduncle on FA skeleton (right)
25139	Mean MD in cingulum cingulate gyrus on FA skeleton (left)
25138	Mean MD in cingulum cingulate gyrus on FA skeleton (right)
25141	Mean MD in cingulum hippocampus on FA skeleton (left)
25140	Mean MD in cingulum hippocampus on FA skeleton (right)
25111	Mean MD in corticospinal tract on FA skeleton (left)
25110	Mean MD in corticospinal tract on FA skeleton (right)
25137	Mean MD in external capsule on FA skeleton (left)
25136	Mean MD in external capsule on FA skeleton (right)
25143	Mean MD in fornix cres+stria terminalis on FA skeleton (left)
25142	Mean MD in fornix cres+stria terminalis on FA skeleton (right)
25109	Mean MD in fornix on FA skeleton
25106	Mean MD in genu of corpus callosum on FA skeleton
25115	Mean MD in inferior cerebellar peduncle on FA skeleton (left)
25114	Mean MD in inferior cerebellar peduncle on FA skeleton (right)
25113	Mean MD in medial lemniscus on FA skeleton (left)
25112	Mean MD in medial lemniscus on FA skeleton (right)
25104	Mean MD in middle cerebellar peduncle on FA skeleton
25105	Mean MD in pontine crossing tract on FA skeleton
25131	Mean MD in posterior corona radiata on FA skeleton (left)
25130	Mean MD in posterior corona radiata on FA skeleton (right)
25123	Mean MD in posterior limb of internal capsule on FA skeleton (left)
25122	Mean MD in posterior limb of internal capsule on FA skeleton (right)
25133	Mean MD in posterior thalamic radiation on FA skeleton (left)
25132	Mean MD in posterior thalamic radiation on FA skeleton (right)
25125	Mean MD in retrolenticular part of internal capsule on FA skeleton (left)
25124	Mean MD in retrolenticular part of internal capsule on FA skeleton (right)
25135	Mean MD in sagittal stratum on FA skeleton (left)
25134	Mean MD in sagittal stratum on FA skeleton (right)
25108	Mean MD in splenium of corpus callosum on FA skeleton
25117	Mean MD in superior cerebellar peduncle on FA skeleton (left)
25116	Mean MD in superior cerebellar peduncle on FA skeleton (right)
25129	Mean MD in superior corona radiata on FA skeleton (left)
25128	Mean MD in superior corona radiata on FA skeleton (right)
25147	Mean MD in superior fronto-occipital fasciculus on FA skeleton (left)
25146	Mean MD in superior fronto-occipital fasciculus on FA skeleton (right)
25145	Mean MD in superior longitudinal fasciculus on FA skeleton (left)
25144	Mean MD in superior longitudinal fasciculus on FA skeleton (right)
25151	Mean MD in tapetum on FA skeleton (left)
25150	Mean MD in tapetum on FA skeleton (right)
25149	Mean MD in uncinate fasciculus on FA skeleton (left)
25148	Mean MD in uncinate fasciculus on FA skeleton (right)
25175	Mean MO in anterior corona radiata on FA skeleton (left)	2	dwMRI: diffusion tensor mode (MO) TBSS
25174	Mean MO in anterior corona radiata on FA skeleton (right)
25169	Mean MO in anterior limb of internal capsule on FA skeleton (left)
25168	Mean MO in anterior limb of internal capsule on FA skeleton (right)
25155	Mean MO in body of corpus callosum on FA skeleton
25167	Mean MO in cerebral peduncle on FA skeleton (left)
25166	Mean MO in cerebral peduncle on FA skeleton (right)
25187	Mean MO in cingulum cingulate gyrus on FA skeleton (left)
25186	Mean MO in cingulum cingulate gyrus on FA skeleton (right)
25189	Mean MO in cingulum hippocampus on FA skeleton (left)
25188	Mean MO in cingulum hippocampus on FA skeleton (right)
25159	Mean MO in corticospinal tract on FA skeleton (left)
25158	Mean MO in corticospinal tract on FA skeleton (right)
25185	Mean MO in external capsule on FA skeleton (left)
25184	Mean MO in external capsule on FA skeleton (right)
25191	Mean MO in fornix cres+stria terminalis on FA skeleton (left)
25190	Mean MO in fornix cres+stria terminalis on FA skeleton (right)
25157	Mean MO in fornix on FA skeleton
25154	Mean MO in genu of corpus callosum on FA skeleton
25163	Mean MO in inferior cerebellar peduncle on FA skeleton (left)
25162	Mean MO in inferior cerebellar peduncle on FA skeleton (right)
25161	Mean MO in medial lemniscus on FA skeleton (left)
25160	Mean MO in medial lemniscus on FA skeleton (right)
25152	Mean MO in middle cerebellar peduncle on FA skeleton
25153	Mean MO in pontine crossing tract on FA skeleton
25179	Mean MO in posterior corona radiata on FA skeleton (left)
25178	Mean MO in posterior corona radiata on FA skeleton (right)
25171	Mean MO in posterior limb of internal capsule on FA skeleton (left)
25170	Mean MO in posterior limb of internal capsule on FA skeleton (right)
25181	Mean MO in posterior thalamic radiation on FA skeleton (left)
25180	Mean MO in posterior thalamic radiation on FA skeleton (right)
25173	Mean MO in retrolenticular part of internal capsule on FA skeleton (left)
25172	Mean MO in retrolenticular part of internal capsule on FA skeleton (right)
25183	Mean MO in sagittal stratum on FA skeleton (left)
25182	Mean MO in sagittal stratum on FA skeleton (right)
25156	Mean MO in splenium of corpus callosum on FA skeleton
25165	Mean MO in superior cerebellar peduncle on FA skeleton (left)
25164	Mean MO in superior cerebellar peduncle on FA skeleton (right)
25177	Mean MO in superior corona radiata on FA skeleton (left)
25176	Mean MO in superior corona radiata on FA skeleton (right)
25195	Mean MO in superior fronto-occipital fasciculus on FA skeleton (left)
25194	Mean MO in superior fronto-occipital fasciculus on FA skeleton (right)
25193	Mean MO in superior longitudinal fasciculus on FA skeleton (left)
25192	Mean MO in superior longitudinal fasciculus on FA skeleton (right)
25199	Mean MO in tapetum on FA skeleton (left)
25198	Mean MO in tapetum on FA skeleton (right)
25197	Mean MO in uncinate fasciculus on FA skeleton (left)
25196	Mean MO in uncinate fasciculus on FA skeleton (right)
25415	Mean OD in anterior corona radiata on FA skeleton (left)	2	dwMRI: orientation dispersion index (OD) TBSS
25414	Mean OD in anterior corona radiata on FA skeleton (right)
25409	Mean OD in anterior limb of internal capsule on FA skeleton (left)
25408	Mean OD in anterior limb of internal capsule on FA skeleton (right)
25395	Mean OD in body of corpus callosum on FA skeleton
25407	Mean OD in cerebral peduncle on FA skeleton (left)
25406	Mean OD in cerebral peduncle on FA skeleton (right)
25427	Mean OD in cingulum cingulate gyrus on FA skeleton (left)
25426	Mean OD in cingulum cingulate gyrus on FA skeleton (right)
25429	Mean OD in cingulum hippocampus on FA skeleton (left)
25428	Mean OD in cingulum hippocampus on FA skeleton (right)
25399	Mean OD in corticospinal tract on FA skeleton (left)
25398	Mean OD in corticospinal tract on FA skeleton (right)
25425	Mean OD in external capsule on FA skeleton (left)
25424	Mean OD in external capsule on FA skeleton (right)
25431	Mean OD in fornix cres+stria terminalis on FA skeleton (left)
25430	Mean OD in fornix cres+stria terminalis on FA skeleton (right)
25397	Mean OD in fornix on FA skeleton
25394	Mean OD in genu of corpus callosum on FA skeleton
25403	Mean OD in inferior cerebellar peduncle on FA skeleton (left)
25402	Mean OD in inferior cerebellar peduncle on FA skeleton (right)
25401	Mean OD in medial lemniscus on FA skeleton (left)
25400	Mean OD in medial lemniscus on FA skeleton (right)
25392	Mean OD in middle cerebellar peduncle on FA skeleton
25393	Mean OD in pontine crossing tract on FA skeleton
25419	Mean OD in posterior corona radiata on FA skeleton (left)
25418	Mean OD in posterior corona radiata on FA skeleton (right)
25411	Mean OD in posterior limb of internal capsule on FA skeleton (left)
25410	Mean OD in posterior limb of internal capsule on FA skeleton (right)
25421	Mean OD in posterior thalamic radiation on FA skeleton (left)
25420	Mean OD in posterior thalamic radiation on FA skeleton (right)
25413	Mean OD in retrolenticular part of internal capsule on FA skeleton (left)
25412	Mean OD in retrolenticular part of internal capsule on FA skeleton (right)
25423	Mean OD in sagittal stratum on FA skeleton (left)
25422	Mean OD in sagittal stratum on FA skeleton (right)
25396	Mean OD in splenium of corpus callosum on FA skeleton
25405	Mean OD in superior cerebellar peduncle on FA skeleton (left)
25404	Mean OD in superior cerebellar peduncle on FA skeleton (right)
25417	Mean OD in superior corona radiata on FA skeleton (left)
25416	Mean OD in superior corona radiata on FA skeleton (right)
25435	Mean OD in superior fronto-occipital fasciculus on FA skeleton (left)
25434	Mean OD in superior fronto-occipital fasciculus on FA skeleton (right)
25433	Mean OD in superior longitudinal fasciculus on FA skeleton (left)
25432	Mean OD in superior longitudinal fasciculus on FA skeleton (right)
25439	Mean OD in tapetum on FA skeleton (left)
25438	Mean OD in tapetum on FA skeleton (right)
25437	Mean OD in uncinate fasciculus on FA skeleton (left)
25436	Mean OD in uncinate fasciculus on FA skeleton (right)
25488	Weighted-mean FA in tract acoustic radiation (left)	2	dwMRI: fractional anisotropy (FA) probabilistic tractography
25489	Weighted-mean FA in tract acoustic radiation (right)
25490	Weighted-mean FA in tract anterior thalamic radiation (left)
25491	Weighted-mean FA in tract anterior thalamic radiation (right)
25492	Weighted-mean FA in tract cingulate gyrus part of cingulum (left)
25493	Weighted-mean FA in tract cingulate gyrus part of cingulum (right)
25496	Weighted-mean FA in tract corticospinal tract (left)
25497	Weighted-mean FA in tract corticospinal tract (right)
25498	Weighted-mean FA in tract forceps major
25499	Weighted-mean FA in tract forceps minor
25500	Weighted-mean FA in tract inferior fronto-occipital fasciculus (left)
25501	Weighted-mean FA in tract inferior fronto-occipital fasciculus (right)
25502	Weighted-mean FA in tract inferior longitudinal fasciculus (left)
25503	Weighted-mean FA in tract inferior longitudinal fasciculus (right)
25505	Weighted-mean FA in tract medial lemniscus (left)
25506	Weighted-mean FA in tract medial lemniscus (right)
25504	Weighted-mean FA in tract middle cerebellar peduncle
25494	Weighted-mean FA in tract parahippocampal part of cingulum (left)
25495	Weighted-mean FA in tract parahippocampal part of cingulum (right)
25507	Weighted-mean FA in tract posterior thalamic radiation (left)
25508	Weighted-mean FA in tract posterior thalamic radiation (right)
25509	Weighted-mean FA in tract superior longitudinal fasciculus (left)
25510	Weighted-mean FA in tract superior longitudinal fasciculus (right)
25511	Weighted-mean FA in tract superior thalamic radiation (left)
25512	Weighted-mean FA in tract superior thalamic radiation (right)
25513	Weighted-mean FA in tract uncinate fasciculus (left)
25514	Weighted-mean FA in tract uncinate fasciculus (right)
25650	Weighted-mean ICVF in tract acoustic radiation (left)		dwMRI: intra-cellular volume fraction (ICVF) probabilistic tractography
25651	Weighted-mean ICVF in tract acoustic radiation (right)
25652	Weighted-mean ICVF in tract anterior thalamic radiation (left)
25653	Weighted-mean ICVF in tract anterior thalamic radiation (right)
25654	Weighted-mean ICVF in tract cingulate gyrus part of cingulum (left)
25655	Weighted-mean ICVF in tract cingulate gyrus part of cingulum (right)
25658	Weighted-mean ICVF in tract corticospinal tract (left)
25659	Weighted-mean ICVF in tract corticospinal tract (right)
25660	Weighted-mean ICVF in tract forceps major
25661	Weighted-mean ICVF in tract forceps minor
25662	Weighted-mean ICVF in tract inferior fronto-occipital fasciculus (left)
25663	Weighted-mean ICVF in tract inferior fronto-occipital fasciculus (right)
25664	Weighted-mean ICVF in tract inferior longitudinal fasciculus (left)
25665	Weighted-mean ICVF in tract inferior longitudinal fasciculus (right)
25667	Weighted-mean ICVF in tract medial lemniscus (left)
25668	Weighted-mean ICVF in tract medial lemniscus (right)
25666	Weighted-mean ICVF in tract middle cerebellar peduncle
25656	Weighted-mean ICVF in tract parahippocampal part of cingulum (left)
25657	Weighted-mean ICVF in tract parahippocampal part of cingulum (right)
25669	Weighted-mean ICVF in tract posterior thalamic radiation (left)
25670	Weighted-mean ICVF in tract posterior thalamic radiation (right)
25671	Weighted-mean ICVF in tract superior longitudinal fasciculus (left)
25672	Weighted-mean ICVF in tract superior longitudinal fasciculus (right)
25673	Weighted-mean ICVF in tract superior thalamic radiation (left)
25674	Weighted-mean ICVF in tract superior thalamic radiation (right)
25675	Weighted-mean ICVF in tract uncinate fasciculus (left)
25676	Weighted-mean ICVF in tract uncinate fasciculus (right)
25704	Weighted-mean ISOVF in tract acoustic radiation (left)	2	dwMRI: isotropic or free water volume fraction (ISOVF) probabilistic tractography
25705	Weighted-mean ISOVF in tract acoustic radiation (right)
25706	Weighted-mean ISOVF in tract anterior thalamic radiation (left)
25707	Weighted-mean ISOVF in tract anterior thalamic radiation (right)
25708	Weighted-mean ISOVF in tract cingulate gyrus part of cingulum (left)
25709	Weighted-mean ISOVF in tract cingulate gyrus part of cingulum (right)
25712	Weighted-mean ISOVF in tract corticospinal tract (left)
25713	Weighted-mean ISOVF in tract corticospinal tract (right)
25714	Weighted-mean ISOVF in tract forceps major
25715	Weighted-mean ISOVF in tract forceps minor
25716	Weighted-mean ISOVF in tract inferior fronto-occipital fasciculus (left)
25717	Weighted-mean ISOVF in tract inferior fronto-occipital fasciculus (right)
25718	Weighted-mean ISOVF in tract inferior longitudinal fasciculus (left)
25719	Weighted-mean ISOVF in tract inferior longitudinal fasciculus (right)
25721	Weighted-mean ISOVF in tract medial lemniscus (left)
25722	Weighted-mean ISOVF in tract medial lemniscus (right)
25720	Weighted-mean ISOVF in tract middle cerebellar peduncle
25710	Weighted-mean ISOVF in tract parahippocampal part of cingulum (left)
25711	Weighted-mean ISOVF in tract parahippocampal part of cingulum (right)
25723	Weighted-mean ISOVF in tract posterior thalamic radiation (left)
25724	Weighted-mean ISOVF in tract posterior thalamic radiation (right)
25725	Weighted-mean ISOVF in tract superior longitudinal fasciculus (left)
25726	Weighted-mean ISOVF in tract superior longitudinal fasciculus (right)
25727	Weighted-mean ISOVF in tract superior thalamic radiation (left)
25728	Weighted-mean ISOVF in tract superior thalamic radiation (right)
25729	Weighted-mean ISOVF in tract uncinate fasciculus (left)
25730	Weighted-mean ISOVF in tract uncinate fasciculus (right)
25569	Weighted-mean L1 in tract acoustic radiation (left)	2	dwMRI: L1 probabilistic tractography
25570	Weighted-mean L1 in tract acoustic radiation (right)
25571	Weighted-mean L1 in tract anterior thalamic radiation (left)
25572	Weighted-mean L1 in tract anterior thalamic radiation (right)
25573	Weighted-mean L1 in tract cingulate gyrus part of cingulum (left)
25574	Weighted-mean L1 in tract cingulate gyrus part of cingulum (right)
25577	Weighted-mean L1 in tract corticospinal tract (left)
25578	Weighted-mean L1 in tract corticospinal tract (right)
25579	Weighted-mean L1 in tract forceps major
25580	Weighted-mean L1 in tract forceps minor
25581	Weighted-mean L1 in tract inferior fronto-occipital fasciculus (left)
25582	Weighted-mean L1 in tract inferior fronto-occipital fasciculus (right)
25583	Weighted-mean L1 in tract inferior longitudinal fasciculus (left)
25584	Weighted-mean L1 in tract inferior longitudinal fasciculus (right)
25586	Weighted-mean L1 in tract medial lemniscus (left)
25587	Weighted-mean L1 in tract medial lemniscus (right)
25585	Weighted-mean L1 in tract middle cerebellar peduncle
25575	Weighted-mean L1 in tract parahippocampal part of cingulum (left)
25576	Weighted-mean L1 in tract parahippocampal part of cingulum (right)
25588	Weighted-mean L1 in tract posterior thalamic radiation (left)
25589	Weighted-mean L1 in tract posterior thalamic radiation (right)
25590	Weighted-mean L1 in tract superior longitudinal fasciculus (left)
25591	Weighted-mean L1 in tract superior longitudinal fasciculus (right)
25592	Weighted-mean L1 in tract superior thalamic radiation (left)
25593	Weighted-mean L1 in tract superior thalamic radiation (right)
25594	Weighted-mean L1 in tract uncinate fasciculus (left)
25595	Weighted-mean L1 in tract uncinate fasciculus (right)
25596	Weighted-mean L2 in tract acoustic radiation (left)	2	dwMRI: L2 probabilistic tractography
25597	Weighted-mean L2 in tract acoustic radiation (right)
25598	Weighted-mean L2 in tract anterior thalamic radiation (left)
25599	Weighted-mean L2 in tract anterior thalamic radiation (right)
25600	Weighted-mean L2 in tract cingulate gyrus part of cingulum (left)
25601	Weighted-mean L2 in tract cingulate gyrus part of cingulum (right)
25604	Weighted-mean L2 in tract corticospinal tract (left)
25605	Weighted-mean L2 in tract corticospinal tract (right)
25606	Weighted-mean L2 in tract forceps major
25607	Weighted-mean L2 in tract forceps minor
25608	Weighted-mean L2 in tract inferior fronto-occipital fasciculus (left)
25609	Weighted-mean L2 in tract inferior fronto-occipital fasciculus (right)
25610	Weighted-mean L2 in tract inferior longitudinal fasciculus (left)
25611	Weighted-mean L2 in tract inferior longitudinal fasciculus (right)
25613	Weighted-mean L2 in tract medial lemniscus (left)
25614	Weighted-mean L2 in tract medial lemniscus (right)
[truncated: 265 more rows]
