# Supplementary material for: Multimodal MRI marker of cognition explains the association between cognition and mental health in the UK Biobank
Source: eLife. 2026 May 20;14:RP108109. doi: 10.7554/eLife.108109 (PMC13189626; doi:10.7554/eLife.108109)
Supplement: Supplementary file 5. [file elife-108109-supp5.xlsx]

## Sheet: Param grids
Hyperparameter grids for machine learning algorithms used in the study
Algorithm (regressor)	Hyperparameter	Values / Range
PLSRegression	n_components	range(1, X_train.shape[1] + 1)
ElasticNet	alpha	np.logspace(-6, 4, 500)
	l1_ratio	np.linspace(0, 1, 100)
	max_iter	1000
SVR	kernel	rbf
	gamma	scale, auto, 1e-08, 1e-07, 1e-06, 1e-05, 1e-04, 1e-03, 3e-08, 3e-07, 3e-06, 3e-05, 3e-04, 3e-03, 6e-08, 6e-07, 6e-06, 6e-05, 6e-04, 6e-03
	C	1, 6, 9, 10, 12, 15, 20, 50
RandomForestRegressor	n_estimators	5000
	max_depth	1, 2, 3, 4, 5, 6
	max_features	sqrt, log2
PLSR, Partial Least Squares Regression; SVR, Support Vector Regression.
